# Supplementary material for: A Quinoxaline−Naphthaldehyde Conjugate for Colorimetric Determination of Copper Ion
Source: MDPI journal article supplement (doi:10.3390/molecules27092908), 2022-05-03
Supplement: s1 [file s1]

## *Electronic Supplementary Information*

### **A quinoxaline–naphthaldehyde conjugate for colorimetric determination of copper ion**

**Sutapa Sahu<sup>1</sup>, Yeasin Sikdar<sup>1,2</sup>, Riya Bag<sup>1</sup>, Michael G. B. Drew<sup>3</sup>, José P. Cerón-Carrasco<sup>4,\*</sup> and Sanchita Goswami<sup>1,\*</sup>**

<sup>1</sup> Department of Chemistry, University of Calcutta, 92, A.P.C. Road, Kolkata 700009, India; sutapa.sahu11@gmail.com (S.S.); y.sikdar@gmail.com (Y.S.); riyabag.chem@gmail.com (R.B.)

<sup>2</sup> Department of Chemistry, The Bhawanipur Education Society College, 5, Lala Lajpat Rai Sarani, Kolkata 700020, India; y.sikdar@gmail.com (Y.S.)

<sup>3</sup> Department of Chemistry, University of Reading, Whiteknights, Reading RG6 6AD, UK

<sup>4</sup> Centro Universitario de la Defensa, Academia General del Aire, Universidad Politécnica de Cartagena, C/Coronel López Peña S/N, Santiago de La Ribera, 30720 Murcia, Spain

\* Correspondence: jose.ceron@ cud.upct.es (J.P.C.-C.); sgchem@caluniv.ac.in (S.G.)

#### **Contents of the Supporting Information**

|                                                                                                                          | <b>Page No.</b> |
|--------------------------------------------------------------------------------------------------------------------------|-----------------|
| <b>Scheme S1.</b> Synthetic procedure of QNH.                                                                            | S3              |
| <b>Figure S1.</b> Molecular structure of QNH. Color code: C = pista green; N = blue; O = red; H= gray; Cl = bright green | S4              |
| <b>Figure S2.</b> <sup>1</sup> H NMR spectrum of QNH in CDCl <sub>3</sub> .                                              | S4              |
| <b>Figure S3.</b> ESI–MS spectrum of QNH.                                                                                | S5              |
| <b>Figure S4.</b> ESI–MS spectrum of QNH + Cu <sup>2+</sup> complex.                                                     | S5              |
| <b>Figure S5.</b> FT–IR spectrum of QNH.                                                                                 | S6              |
| <b>Figure S6.</b> FT–IR spectrum of QNH + Cu <sup>2+</sup> complex                                                       | S6              |

|                                                                                                                                                                                                                                                                                                                                                                                                                                                                        |     |
|------------------------------------------------------------------------------------------------------------------------------------------------------------------------------------------------------------------------------------------------------------------------------------------------------------------------------------------------------------------------------------------------------------------------------------------------------------------------|-----|
| <b>Figure S7.</b> Absorbance spectra of QNH ( $10^{-5}$ M) in presence of 5 equiv. of various cations ( $\text{Na}^+$ , $\text{K}^+$ , $\text{Ca}^{2+}$ , $\text{Mg}^{2+}$ , $\text{Hg}^{2+}$ , $\text{Ni}^{2+}$ , $\text{Fe}^{3+}$ , $\text{Cu}^{2+}$ , $\text{Co}^{2+}$ , $\text{Cd}^{2+}$ , $\text{Zn}^{2+}$ , $\text{Mn}^{2+}$ , $\text{Pb}^{2+}$ , $\text{Al}^{3+}$ , $\text{Cr}^{3+}$ ) in (3:7, v/v) HEPES buffer : acetonitrile medium.                        | S7  |
| <b>Figure S8.</b> Absorption intensity of QNH ( $10^{-5}$ M) in the presence of 5 equiv. of different cations in absence of same equiv. of $\text{Cu}^{2+}$ in solution [the green bar portion]. Absorption intensity of a mixture of QNH ( $10^{-5}$ M) with 5 equiv. of other cations followed by addition of 5 equiv. of $\text{Cu}^{2+}$ to the solution ( $\lambda_{\text{abs}}=552$ nm) [the orange blue bar portion].                                           | S7  |
| <b>Figure S9.</b> Determination of the detection limit of QNH in presence of $\text{Cu}^{2+}$ in (3:7 v/v) HEPES buffer : acetonitrile medium at 552 nm.                                                                                                                                                                                                                                                                                                               | S8  |
| <b>Figure S10.</b> Job's plot for the identification of stoichiometry using absorbance values at 552 nm.                                                                                                                                                                                                                                                                                                                                                               | S8  |
| <b>Figure S11.</b> Benesi-Hildebrand plot for determination of binding constant of QNH with $\text{Cu}^{2+}$ .                                                                                                                                                                                                                                                                                                                                                         | S9  |
| <b>Figure S12.</b> Absorbance of QNH in absence and in presence of $\text{Cu}^{2+}$ at different pH values.                                                                                                                                                                                                                                                                                                                                                            | S9  |
| <b>Figure S13.</b> Absorbance spectra of QNH in present different anion $\text{Cu}^{2+}$ of salts. (Inset: Bar plot of QNH in present different anion $\text{Cu}^{2+}$ of salts)                                                                                                                                                                                                                                                                                       | S10 |
| <b>Figure S14.</b> (A) Absorption spectrum of QNH shows reversibility towards $\text{Cu}^{2+}$ in presence of EDTA in (3:7, v/v) HEPES buffer : acetonitrile medium. (B) The reversible colorimetric switch by alternate addition of $\text{Cu}^{2+}$ and EDTA into the (3:7, v/v) HEPES buffer : acetonitrile medium. (C) Visual color change of QNH showing reversibility towards $\text{Cu}^{2+}$ in presence of EDTA.                                              | S10 |
| <b>Figure S15.</b> (A) UV–Visible titration of QNH– $\text{Cu}^{2+}$ complex ( $10^{-5}$ M) in the presence of various concentration of histidine. (Downward arrow indicates gradual decrease of absorption at 552 nm with increasing concentration of externally added histidine) (Inset: Visual color change of QNH in presence of $\text{Cu}^{2+}$ followed by histidine). (B) Absorbance of QNH– $\text{Cu}^{2+}$ complex at 552 nm as a function of [histidine]). | S11 |
| <b>Figure S16.</b> Determination of the detection limit of Histidine in (3:7 v/v) HEPES buffer :                                                                                                                                                                                                                                                                                                                                                                       | S11 |

|                                                                                                                                                                                                                                                            |     |
|------------------------------------------------------------------------------------------------------------------------------------------------------------------------------------------------------------------------------------------------------------|-----|
| acetonitrile medium at 552 nm.                                                                                                                                                                                                                             |     |
| <b>Figure S17.</b> Visual change of QNH in presence of Cu <sup>2+</sup> in A) paper strip and B) gel form.                                                                                                                                                 | S12 |
| <b>Figure S18.</b> Crystal structure of QNH + Cu <sup>2+</sup> metal complex. (Inset: The geometry of the two Cu centre of the complex in unit A and unit B). Color code: C = pista green; N = blue; O = red; H= gray; Cl = bright green; Cu = cyan.       | S12 |
| <b>Figure S19.</b> The supramolecular 2D packing diagram of the QNH showing the propagation via H-bonding and short ring-interactions, forms a 2D sheet like structure.                                                                                    | S13 |
| <b>Figure S20.</b> The supramolecular 1D packing diagram of QNH via (A) H-bonding interaction along b axis with enlarged version and c axis view of the interaction; (B) short ring-interactions with enlarged version and c axis view of the interaction. | S13 |
| <b>Table S1.</b> Colorimetric Cu <sup>2+</sup> sensing receptors found in the literature.                                                                                                                                                                  | S14 |
| <b>Table S2.</b> The crystallographic data for QNH.                                                                                                                                                                                                        | S16 |
| <b>Table S3.</b> The crystallographic data for QNH + Cu <sup>2+</sup> .                                                                                                                                                                                    | S17 |
| <b>Table S4.</b> Analysis of X-I...J (H bonding) interactions in QNH. (Bond lengths (Å), bond angles (°)).                                                                                                                                                 | S19 |
| <b>Table S5.</b> Analysis of short ring-interactions with Cg...Cg distances (Å) in QNH.                                                                                                                                                                    | S19 |

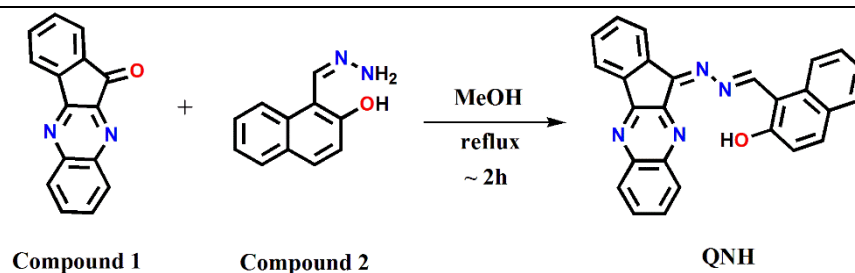

**Scheme S1.** Synthetic procedure of QNH.

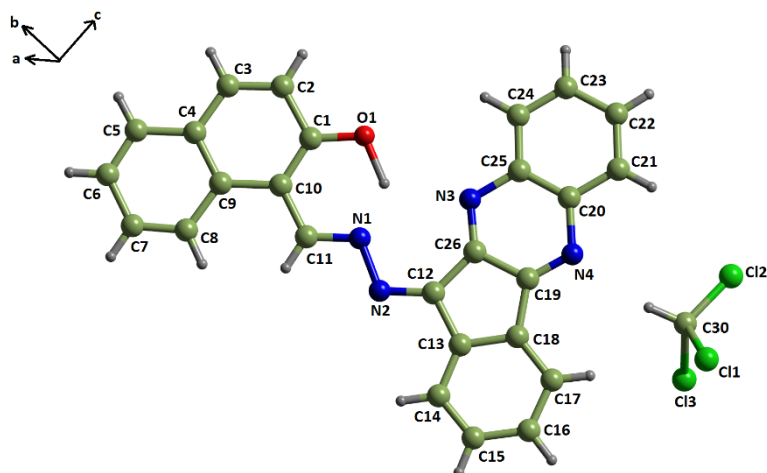

**Figure S1.** Molecular structure of QNH. Color code: C = pista green; N = blue; O = red; H= gray; Cl = bright green.

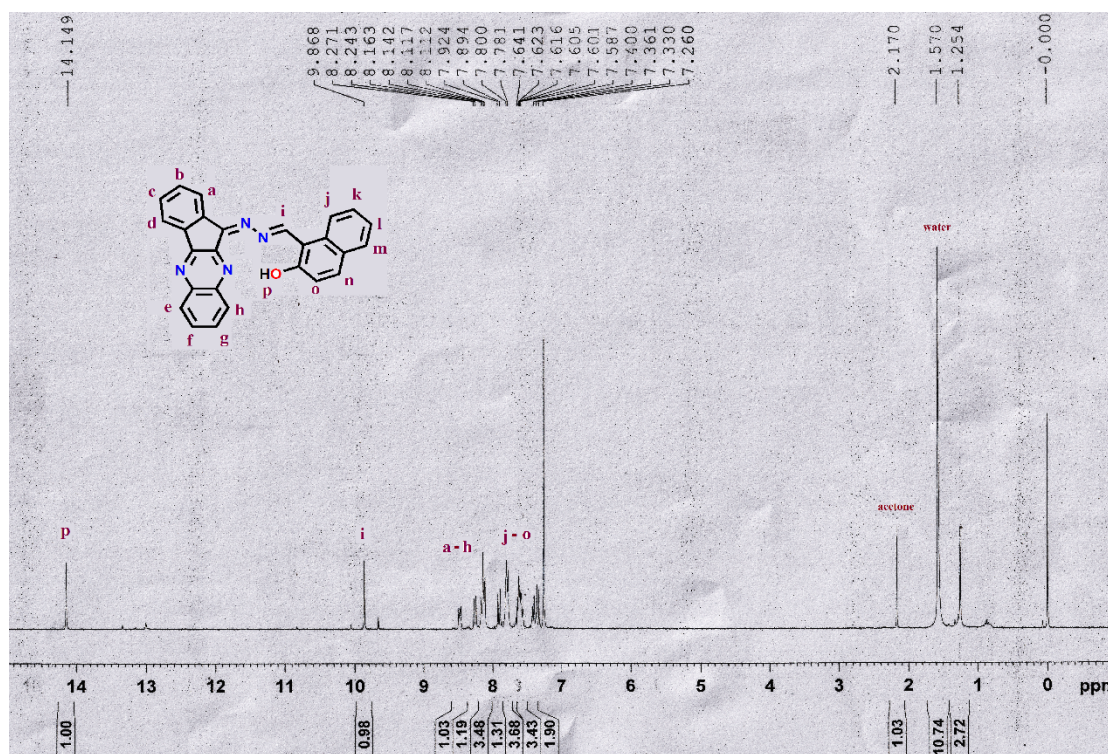

**Figure S2.**  $^1\text{H}$  NMR spectrum of QNH in  $\text{CDCl}_3$ .



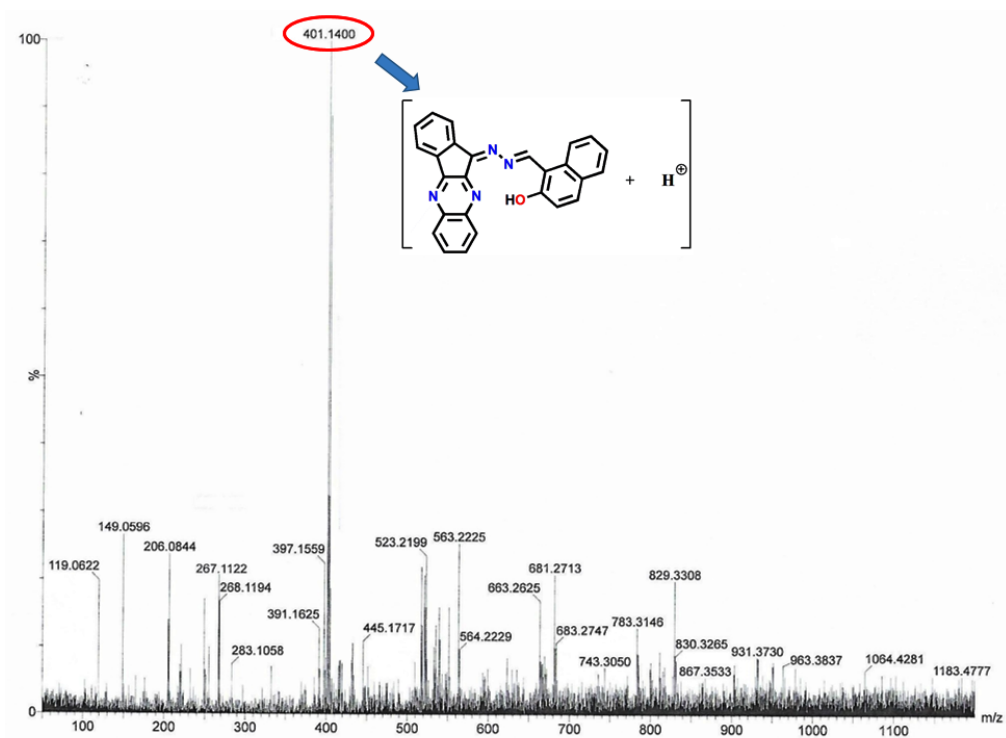

**Figure S3.** ESI-MS spectrum of QNH.

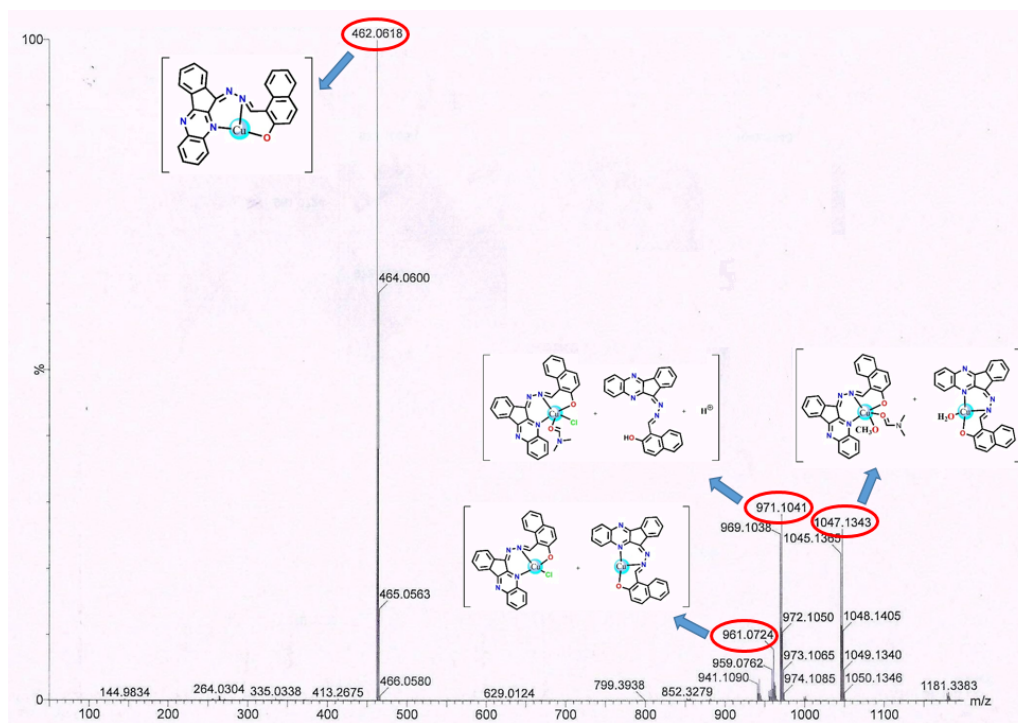

**Figure S4.** ESI-MS Spectrum of QNH +  $Cu^{2+}$  complex.

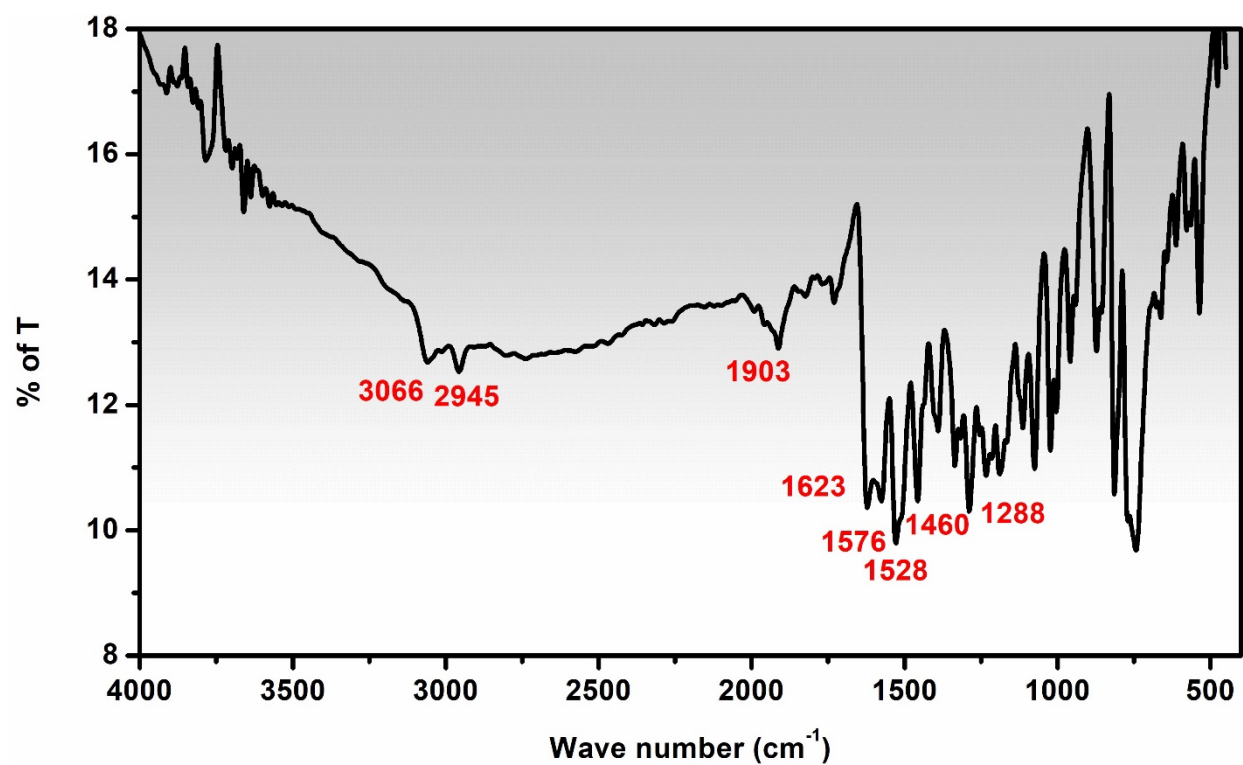

Figure S5. FT-IR Spectrum of QNH.

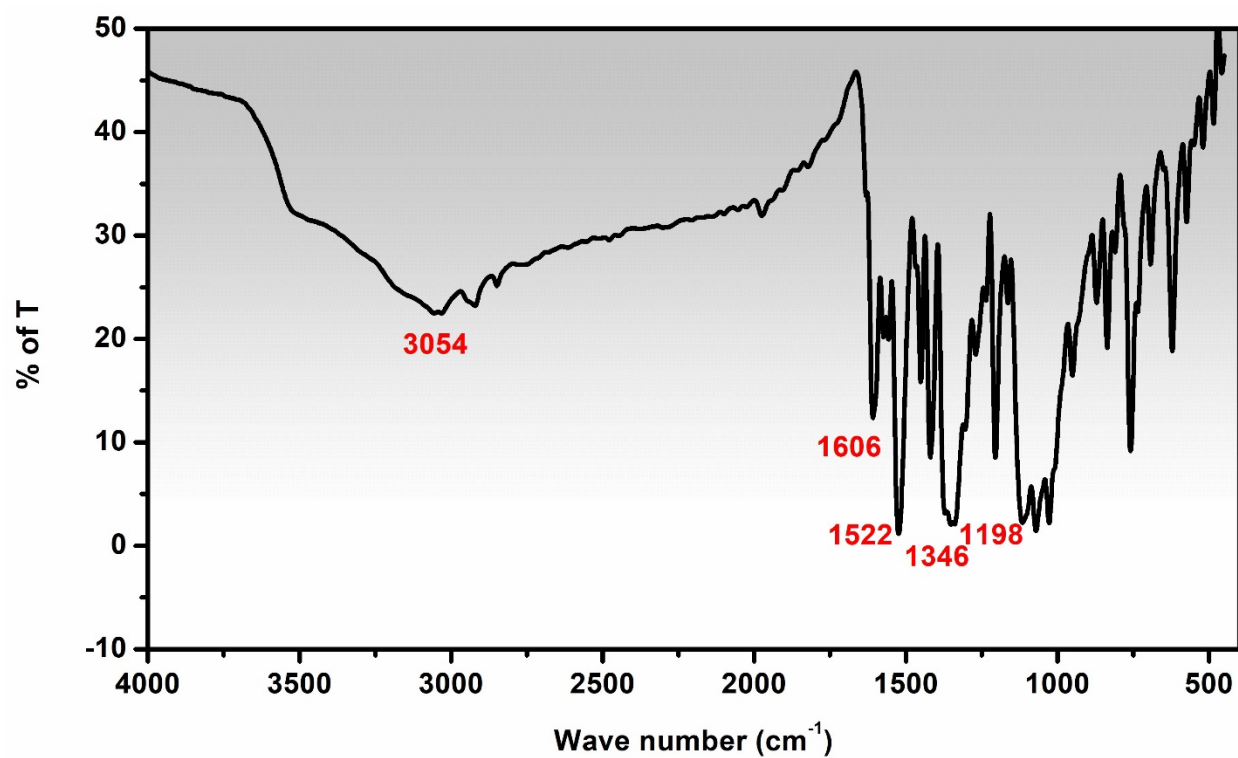

Figure S6. FT-IR Spectrum of QNH + Cu<sup>2+</sup> complex

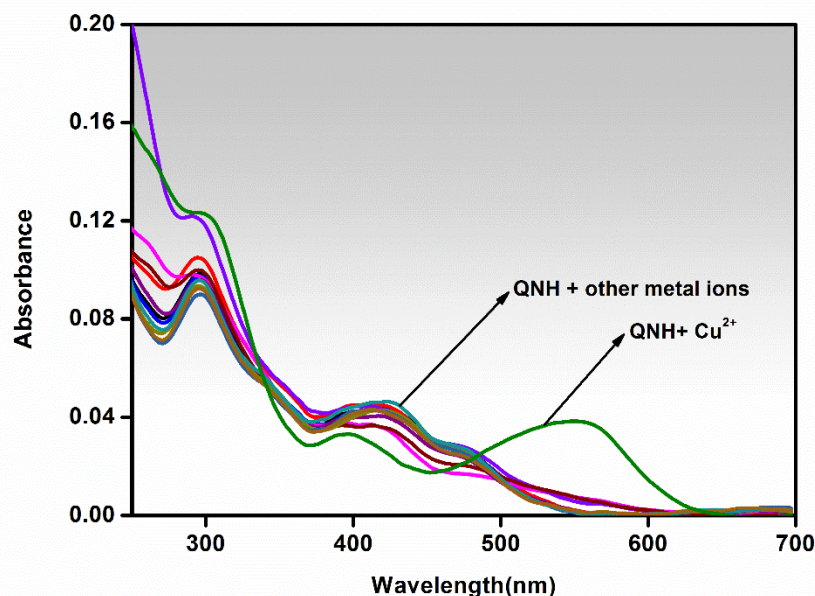

**Figure S7.** Absorbance spectra of QNH ( $10^{-5}$  M) in presence of 5 equiv. of various cations ( $\text{Na}^+$ ,  $\text{K}^+$ ,  $\text{Ca}^{2+}$ ,  $\text{Mg}^{2+}$ ,  $\text{Hg}^{2+}$ ,  $\text{Ni}^{2+}$ ,  $\text{Fe}^{3+}$ ,  $\text{Cu}^{2+}$ ,  $\text{Co}^{2+}$ ,  $\text{Cd}^{2+}$ ,  $\text{Zn}^{2+}$ ,  $\text{Mn}^{2+}$ ,  $\text{Pb}^{2+}$ ,  $\text{Al}^{3+}$ ,  $\text{Cr}^{3+}$ ) in (3:7, v/v) HEPES buffer : acetonitrile medium.

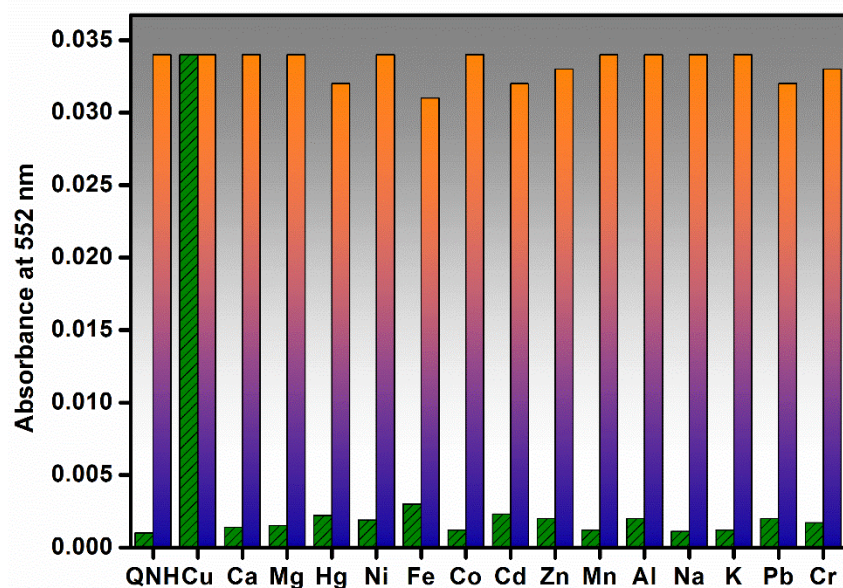

**Figure S8.** Absorption intensity of QNH ( $10^{-5}$  M) in the presence of 5 equiv. of different cations in absence of same equiv. of  $\text{Cu}^{2+}$  in solution [the green bar portion]. Absorption intensity of a mixture of QNH ( $10^{-5}$  M) with 5 equiv. of other cations followed by addition of 5 equiv. of  $\text{Cu}^{2+}$  to the solution ( $\lambda_{\text{abs}}=552\text{nm}$ ) [the orange blue bar portion].



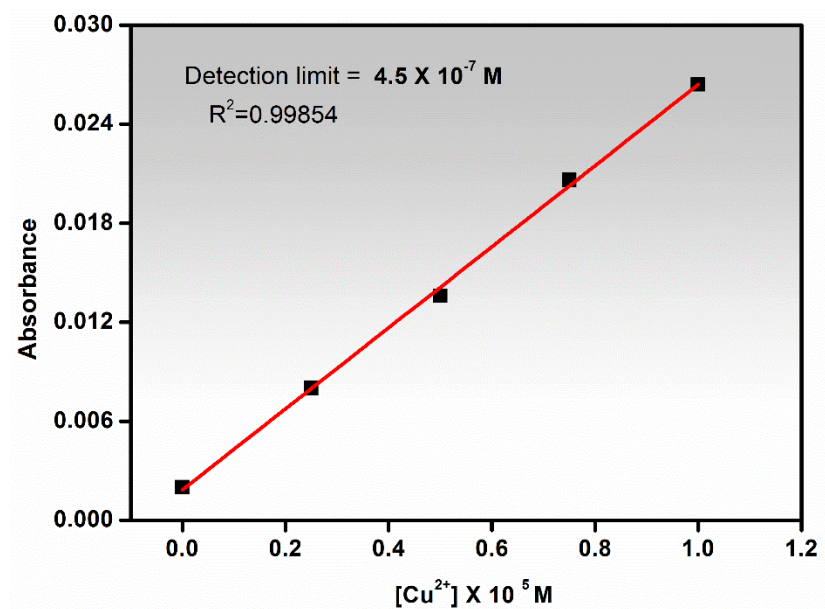

**Figure S9.** Determination of the detection limit of QNH in presence of Cu<sup>2+</sup> in (3:7, v/v) HEPES buffer : acetonitrile medium at 552 nm.

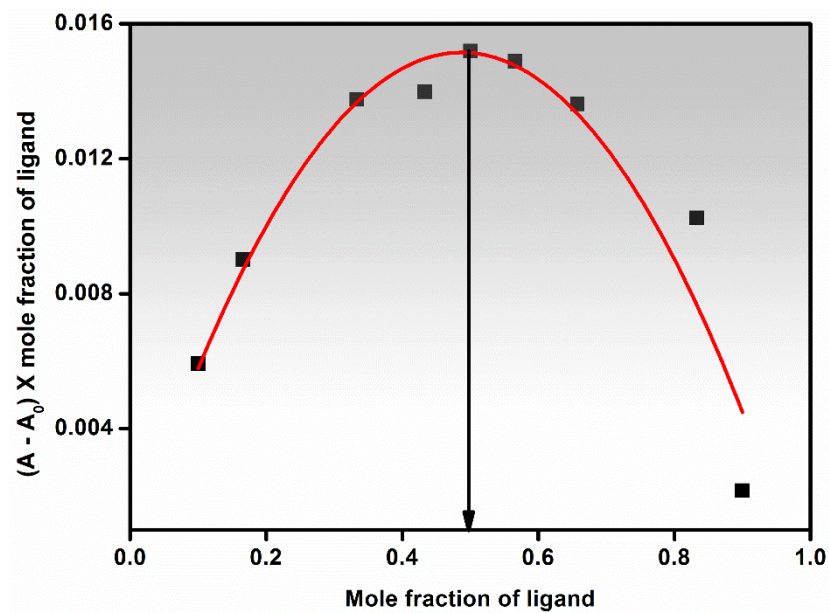

**Figure S10.** Job's plot for the identification of stoichiometry using absorbance values at 552 nm.

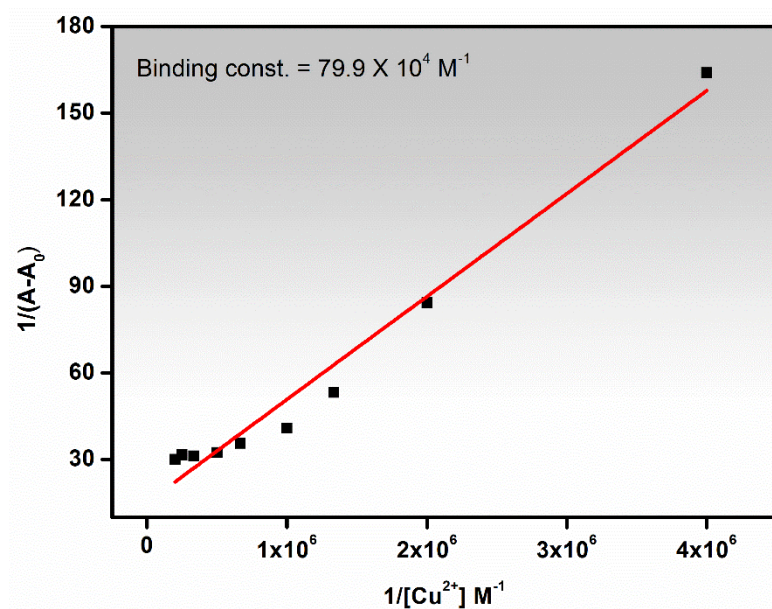

**Figure S11.** Benesi-Hildebrand plot for determination of binding constant of QNH with  $Cu^{2+}$ .

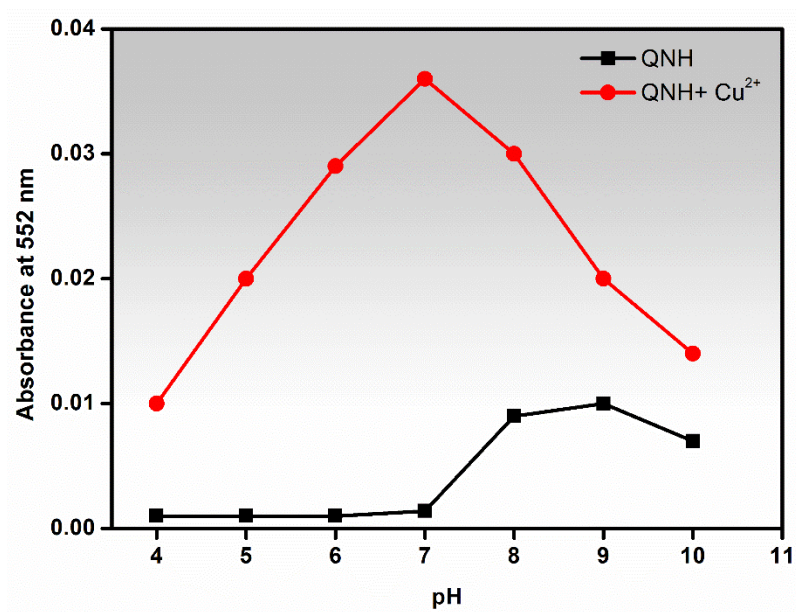

**Figure S12.** Absorbance of QNH in absence and in presence of  $Cu^{2+}$  at different pH values.

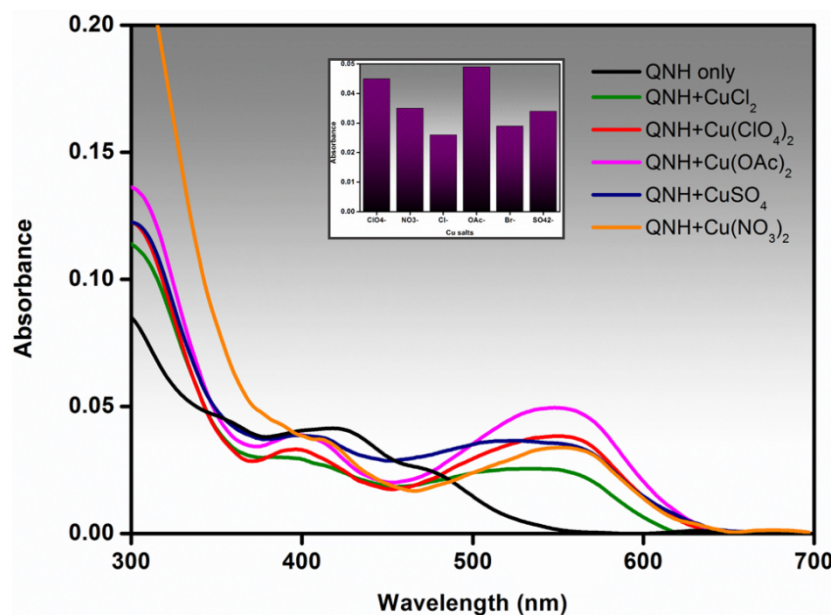

**Figure S13.** Absorbance spectra of QNH in presence of different anions of  $\text{Cu}^{2+}$  salts. (Inset: Bar plot of QNH in presence of different anions of  $\text{Cu}^{2+}$  salts)

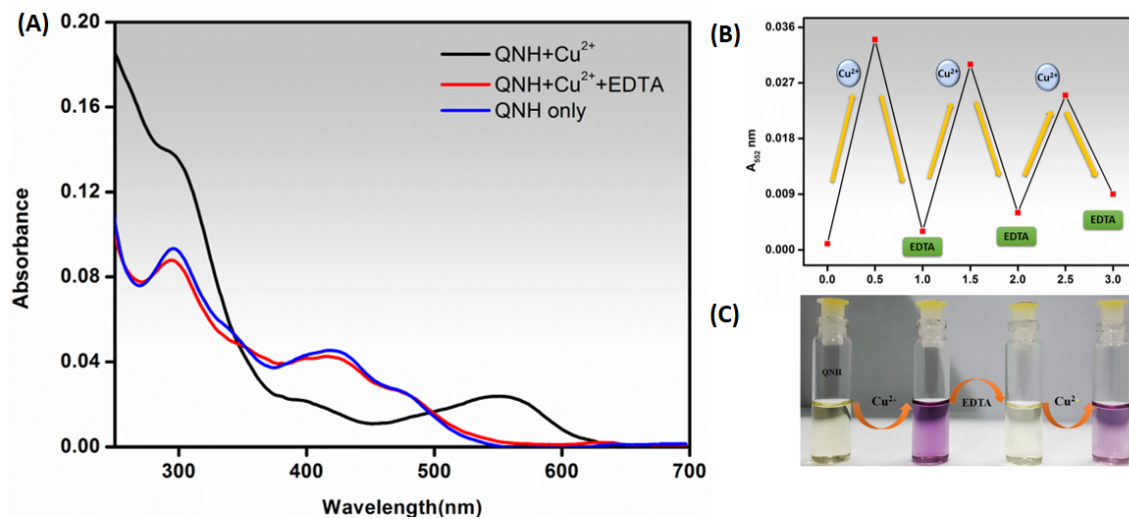

**Figure S14.** (A) Absorption spectrum of QNH shows reversibility towards  $\text{Cu}^{2+}$  in presence of EDTA in (3:7, v/v) HEPES buffer : acetonitrile medium. (B) The reversible colorimetric switch by alternate addition of  $\text{Cu}^{2+}$  and EDTA into the (3:7, v/v) HEPES buffer : acetonitrile medium. (C) Visual color change of QNH showing reversibility towards  $\text{Cu}^{2+}$  in presence of EDTA.



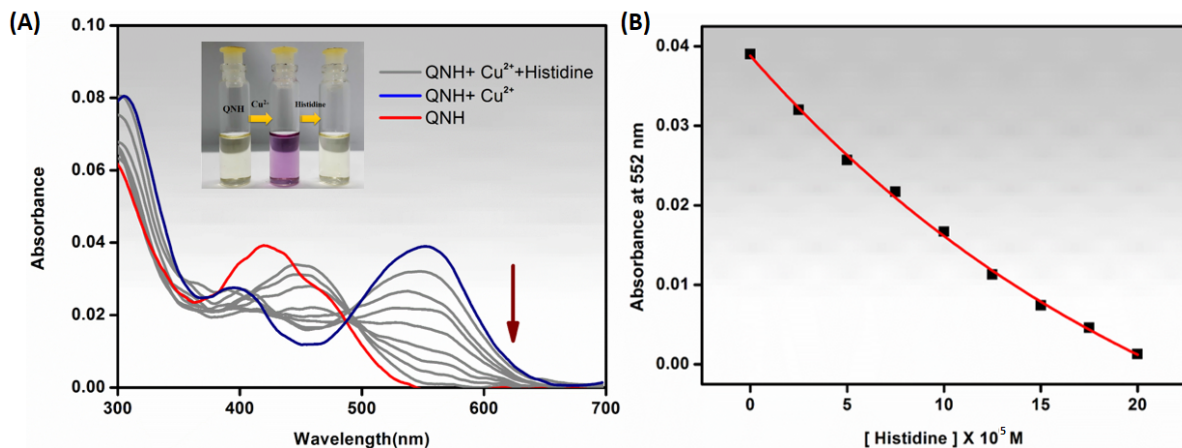

**Figure S15.** (A) UV-Vis titration of QNH-Cu<sup>2+</sup> complex (10<sup>-5</sup>M) in the presence of various concentration of Histidine. (Downward arrow indicates gradual decrease of absorption at 552 nm with increasing concentration of externally added Histidine) (Inset: Visual color change of QNH in presence of Cu<sup>2+</sup> followed by histidine). (B) Absorbance of QNH-Cu<sup>2+</sup> complex at 552 nm as a function of [Histidine]).

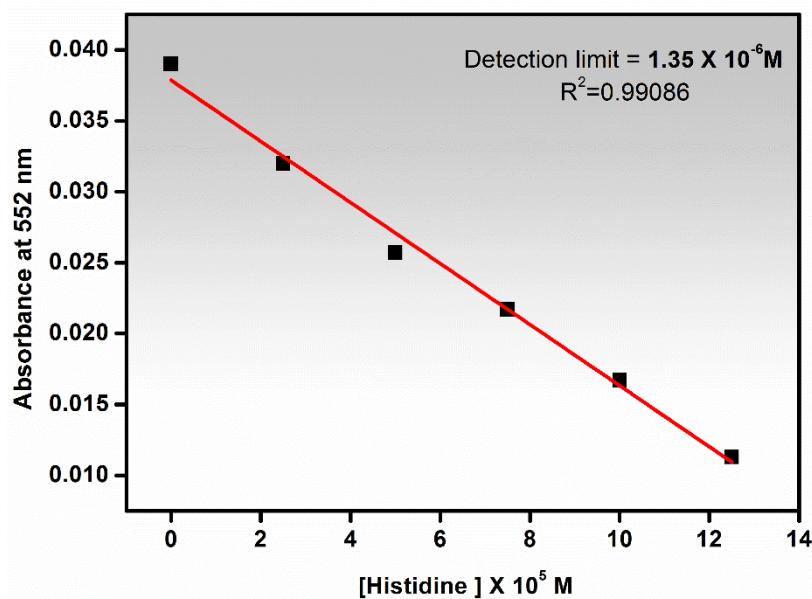

**Figure S16.** Determination of the detection limit of Histidine in (3:7 v/v) HEPES buffer : acetonitrile medium at 552 nm.

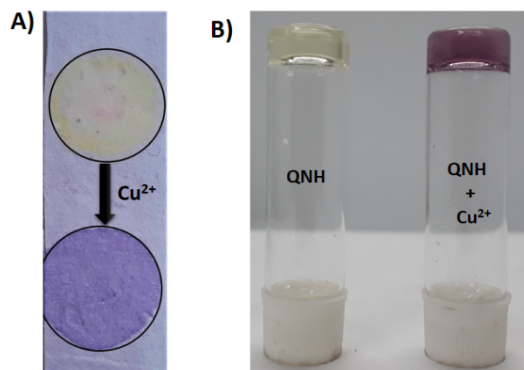

**Figure S17.** Visual change of QNH in presence of  $\text{Cu}^{2+}$  in A) paper strip and B) gel form.

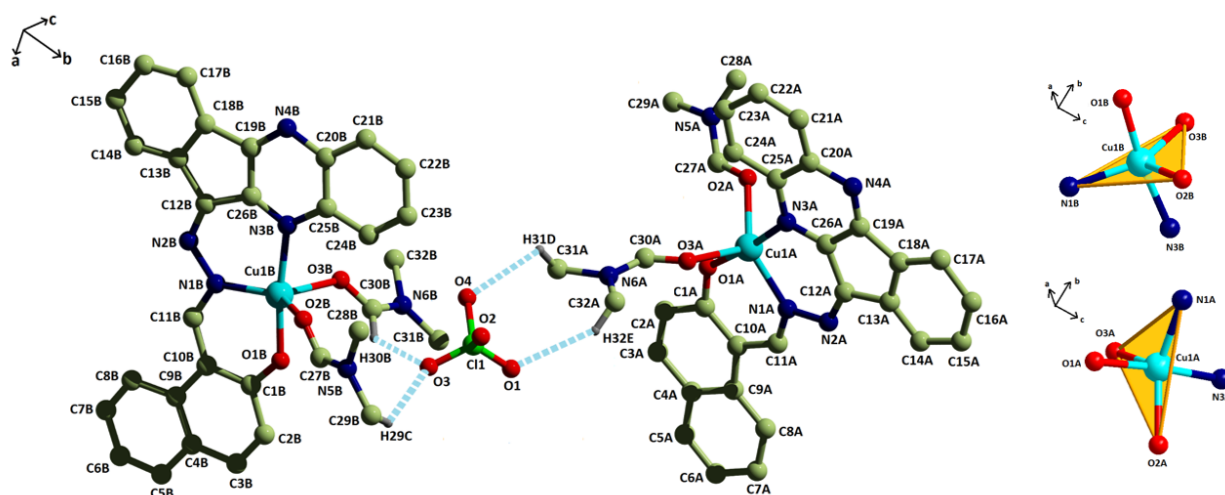

**Figure S18.** Crystal structure of  $\text{QNH} + \text{Cu}^{2+}$  metal complex. (Inset: The geometry of the two Cu centre of the complex in unit A and unit B). Color code: C = pista green; N = blue; O = red; H= gray; Cl = bright green; Cu = cyan.

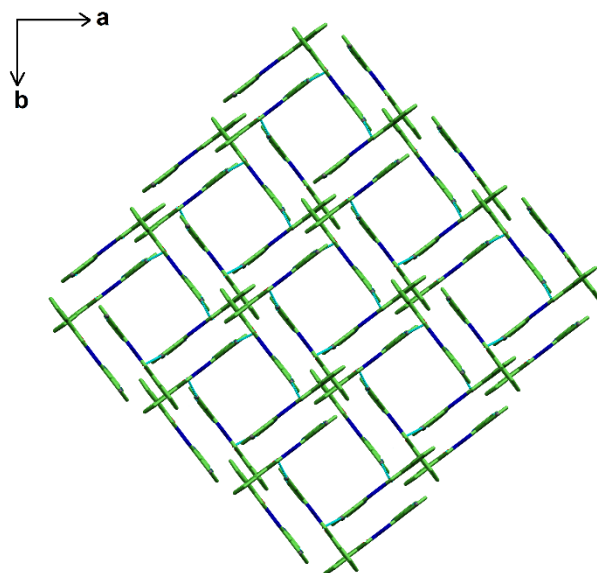

**Figure S19.** The supramolecular 2D packing diagram of the QNH showing the propagation via H-bonding and short ring-interactions, forms a 2D sheet like structure.

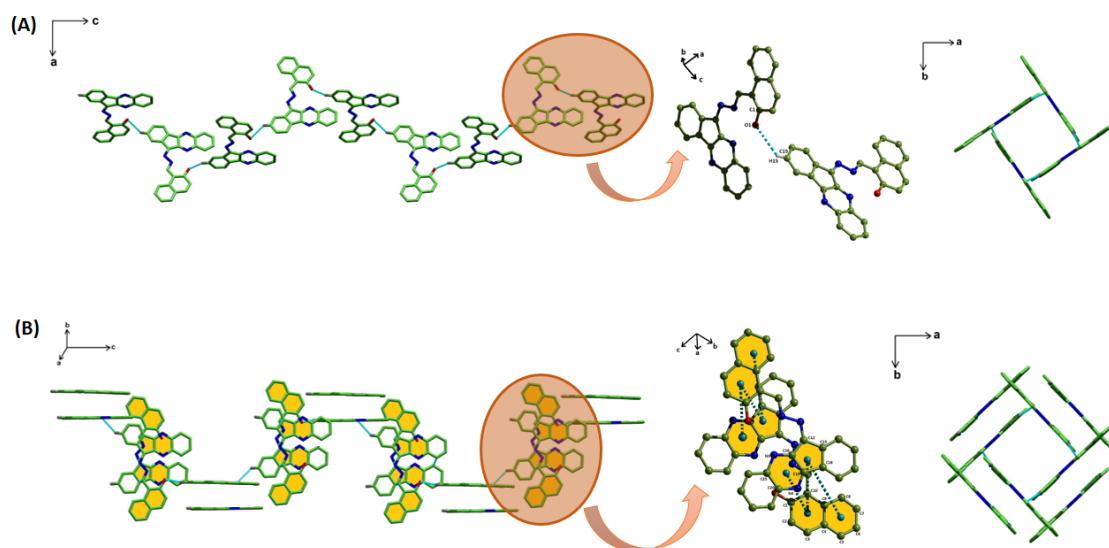

**Figure S20.** The supramolecular 1D packing diagram of QNH via (A)H-bonding interaction along b axis with enlarged version and c axis view of the interaction ; (B) short ring-interactions with enlarged version and c axis view of the interaction.

**Table S1.**Colorimetric Cu<sup>2+</sup> sensing receptors found in the literature.

| Ligand structure                                                                    | Solvent                                        | Detection limit<br>(Absorption) | Ref.      |
|-------------------------------------------------------------------------------------|------------------------------------------------|---------------------------------|-----------|
| 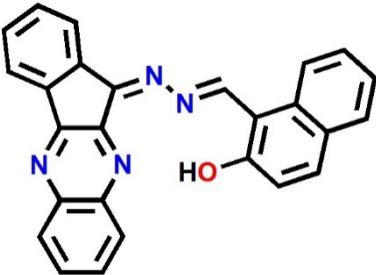   | HEPES buffer :<br>CH <sub>3</sub> CN (3:7;v/v) | 0.45 μM                         | This work |
|    | DMSO                                           | 1.6 μM                          | [1]       |
|   | EtOH/ HEPES buffer<br>(9:1; v/v)               | 2 μM                            | [2]       |
|  | Bis-tris<br>buffer/DMSO (7:3;<br>v/v)          | 0.14 μM                         | [3]       |
|  | MeOH                                           | 0.041 μM                        | [4]       |

|                                                                                     |                                  |          |     |
|-------------------------------------------------------------------------------------|----------------------------------|----------|-----|
| 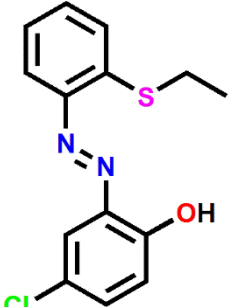   | CH <sub>3</sub> CN               | 0.062 μM | [5] |
|    | THF: water( 9: 1; v/v )          | 1.54 μM  | [6] |
|    | EtOH:H <sub>2</sub> O (1:9;v/v ) | 3.49 μM  | [7] |
|   | THF–HEPES buffer (9:1;v/v)       | 10 μM    | [8] |
|  | H <sub>2</sub> O                 | 0.031 μM | [9] |

|                                                                                   |                                                  |         |      |
|-----------------------------------------------------------------------------------|--------------------------------------------------|---------|------|
| 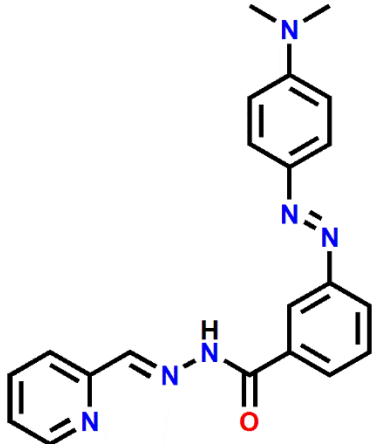 | CH <sub>3</sub> CN:HEPES<br>buffer (1:1;v/v)     | 3.68 μM | [10] |
|  | CH <sub>3</sub> CN/H <sub>2</sub> O<br>(4:1;v/v) | 8.06 μM | [11] |

**Table S2.** The crystallographic data for QNH.

|                      |                                                                          |
|----------------------|--------------------------------------------------------------------------|
| CCDC No              | 2156635                                                                  |
| Chem. Formula        | 2(C <sub>26</sub> H <sub>16</sub> N <sub>4</sub> O), C H Cl <sub>3</sub> |
| Formula weight       | 920.22                                                                   |
| Crystal color, habit | Orange, rectangular                                                      |
| Temp (K)             | 296                                                                      |
| $\lambda^a$ / Å      | 0.71073                                                                  |
| Crystal system       | tetragonal                                                               |
| Space group          | I 41/a                                                                   |
| Unit cell dimensions |                                                                          |
| $a$ (Å)              | 16.455(2)                                                                |
| $b$ (Å)              | 16.455(2)                                                                |
| $c$ (Å)              | 33.088(9)                                                                |
| $\alpha$ (deg)       | 90                                                                       |



|                                                                                                                                                                                                                                                                                           |                |
|-------------------------------------------------------------------------------------------------------------------------------------------------------------------------------------------------------------------------------------------------------------------------------------------|----------------|
| $\beta$ (deg)                                                                                                                                                                                                                                                                             | 90             |
| $\gamma$ (deg)                                                                                                                                                                                                                                                                            | 90             |
| Volume (Å <sup>3</sup> ), Z                                                                                                                                                                                                                                                               | 8959(3), 8     |
| Density (mg m <sup>-3</sup> )                                                                                                                                                                                                                                                             | 1.365          |
| Absorption Coeff(mm <sup>-1</sup> )                                                                                                                                                                                                                                                       | 0.258          |
| F(000)                                                                                                                                                                                                                                                                                    | 3792           |
| Crystal size (mm)                                                                                                                                                                                                                                                                         | 0.19×0.17×0.12 |
| $\theta$ range (deg)                                                                                                                                                                                                                                                                      | 1.3–23.7       |
|                                                                                                                                                                                                                                                                                           | –18≤h≤17       |
|                                                                                                                                                                                                                                                                                           | –18≤k≤18       |
| Limiting indices                                                                                                                                                                                                                                                                          | –35≤l≤37       |
| Reflections collected                                                                                                                                                                                                                                                                     | 19954          |
| Unique reflections [R <sub>int</sub> ]                                                                                                                                                                                                                                                    | 3383(0.093)    |
| Completeness to $\theta$                                                                                                                                                                                                                                                                  | 98.5%(23.7)    |
| Data/restraints/parameters                                                                                                                                                                                                                                                                | 3383/0/319     |
| GOOF on F <sup>2</sup>                                                                                                                                                                                                                                                                    | 1.083          |
| R <sub>1</sub> <sup>a</sup> , wR <sub>2</sub> <sup>b</sup> values [I > 2σ(I)]                                                                                                                                                                                                             | 0.1034, 0.3079 |
| R <sub>1</sub> <sup>a</sup> , wR <sub>2</sub> <sup>b</sup> values (all data)                                                                                                                                                                                                              | 0.1861, 0.3480 |
| Maximum, minimum residual peaks (e Å <sup>-3</sup> )                                                                                                                                                                                                                                      | 0.584, -0.400  |
| <sup>a</sup> Graphitemonochromator <sup>b</sup> R <sub>1</sub> = Σ( F <sub>o</sub>   –  F <sub>c</sub>  )/Σ F <sub>o</sub>  . <sup>c</sup> wR <sub>2</sub> = {Σ[w( F <sub>o</sub>   <sup>2</sup> –  F <sub>c</sub>   <sup>2</sup> )/Σ[w( F <sub>o</sub>   <sup>2</sup> )]} <sup>1/2</sup> |                |

**Table S3.** The crystallographic data for QNH + Cu<sup>2+</sup>.

|                      |                                                                                        |
|----------------------|----------------------------------------------------------------------------------------|
| CCDC No              | 2156636                                                                                |
| Chem. Formula        | C <sub>32</sub> H <sub>30</sub> Cl <sub>0.75</sub> Cu N <sub>6</sub> O <sub>6.50</sub> |
| Formula weight       | 692.75                                                                                 |
| Crystal color, habit | black bronze, rectangular cuboid                                                       |
| Temp (K)             | 296                                                                                    |
| $\lambda^a$ / Å      | 0.71073                                                                                |
| Crystal system       | triclinic                                                                              |
| Space group          | <i>P</i> - <i>1</i>                                                                    |

---

|                                                                                                                                                                                  |                      |
|----------------------------------------------------------------------------------------------------------------------------------------------------------------------------------|----------------------|
| Unit cell dimensions                                                                                                                                                             |                      |
| $a$ (Å)                                                                                                                                                                          | 14.067(4)            |
| $b$ (Å)                                                                                                                                                                          | 15.587(4)            |
| $c$ (Å)                                                                                                                                                                          | 15.601(4)            |
| $\alpha$ (deg)                                                                                                                                                                   | 106.091(7)           |
| $\beta$ (deg)                                                                                                                                                                    | 91.734(7)            |
| $\gamma$ (deg)                                                                                                                                                                   | 100.266(8)           |
| Volume (Å <sup>3</sup> ), $Z$                                                                                                                                                    | 3222.4(14), 4        |
| Density (mg m <sup>-3</sup> )                                                                                                                                                    | 1.428                |
| Absorption Coeff (mm <sup>-1</sup> )                                                                                                                                             | 0.795                |
| $F(000)$                                                                                                                                                                         | 1431                 |
| Crystal size (mm)                                                                                                                                                                | 0.20×0.17×0.11       |
| $\theta$ range (deg)                                                                                                                                                             | 1.36–24.9            |
|                                                                                                                                                                                  | $-13 \leq h \leq 16$ |
|                                                                                                                                                                                  | $-18 \leq k \leq 18$ |
| Limiting indices                                                                                                                                                                 | $-18 \leq l \leq 18$ |
| Reflections collected                                                                                                                                                            | 27051                |
| Unique reflections [ $R_{\text{int}}$ ]                                                                                                                                          | 11126(0.067)         |
| Completeness to $\theta$                                                                                                                                                         | 99.7% (24.9)         |
| Data/restraints/parameters                                                                                                                                                       | 11126/0/838          |
| GOOF on $F^2$                                                                                                                                                                    | 2.051                |
| $R_1^a$ , $wR_2^b$ values [ $I > 2\sigma(I)$ ]                                                                                                                                   | 0.1842, 0.4651       |
| $R_1^a$ , $wR_2^b$ values (all data)                                                                                                                                             | 0.2217, 0.5019       |
| Maximum, minimum residual peaks (e Å <sup>-3</sup> )                                                                                                                             | 3.32, -1.03          |
| <sup>a</sup> Graphite monochromator <sup>b</sup> $R_1 = \Sigma( F_o  -  F_c )/\Sigma F_o $ . <sup>c</sup> $wR_2 = \{\Sigma[w( F_o ^2 -  F_c ^2)^2]/\Sigma[w( F_o ^2)^2]\}^{1/2}$ |                      |

---

**Table S4.** Analysis of X–I···J (H bonding) interactions in QNH. (Bond lengths (Å), bond angles (°))

| I  | J   | Distance(I···J) | X  | ∠X–I···J |
|----|-----|-----------------|----|----------|
| O1 | H15 | 2.65            | C1 | 104°     |

**Table S5.** Analysis of short ring–interactions with Cg···Cg distances (Å) in QNH.

| Cg···Cg          | Cg···Cg distance (Å) | Slippage(Å) |
|------------------|----------------------|-------------|
| <b>Cg1···Cg3</b> | 3.7606(10)           | 1.382       |
| <b>Cg3···Cg1</b> | 3.7606(10)           | 1.333       |
| <b>Cg1···Cg4</b> | 3.9321(11)           | 1.824       |
| <b>Cg4···Cg1</b> | 3.9321(11)           | 1.741       |
| <b>Cg2···Cg4</b> | 3.5062(10)           | 0.327       |
| <b>Cg4···Cg2</b> | 3.5062(10)           | 0.406       |

Cg1: C12 C13 C18 C19 C26

Cg2: N3 C25 C20 N4 C19 C26

Cg3:C1 C2 C3 C4 C9 C10

Cg4:C4 C5 C6 C7 C8 C9

## References

- [1] I. J. Chang, M. G. Choi, Y. A. Jeong, S. H. Lee, S.-K. Chang, *Tetrahedron Lett.* **2017**, 58, 474-477.
- [2] Y. Hu, J. Zhang, Y.-Z. Lv, X.-H. Huang, S.-l. Hu, *Spectrochim. Acta - A: Mol. Biomol. Spectrosc.* **2016**, 157, 164-169.
- [3] M. S. Kim, J. M. Jung , J. H. Kang , H. M. Ahn , P.-G. Kim, C. Kim ,*Tetrahedron* **2017**, 73, 4750-4757.
- [4] H. Liu, S. Cui, F. Shi, S. Pu , *Dyes Pigm.* **2019**, 161, 34-43.
- [5] P. Roy, S. Das, K. Aich, S. Gharami, L. Patra, T. K. Mondal , *J. Indian Chem. Soc.* **2017**, 94, 755-760.
- [6] M. Pannipara, A. G. A. Sehem, M. Assiri, A. Kalama , *Opt. Mater.* **2018**, 79, 255–258.
- [7] P. A. Patil, S. Sehlangia, C. P. Pradeep , *Sensors International* 2021, 2, 100075.
- [8] S.-M. Shi, Q. Li, S.-L. Hu, *J. Chem. Res.* **2019**, 43, 426–430.

- [9] H. Tavallali, G. Deilamy-Rad, M. A. Karimi, E. Rahimy, *Anal. Biochem.* **2019**, 583, 113376.
- [10] Y. Zhang, Y.-T. Wang, X.-X. Kang, M. Ge, H.-Y. Feng, J. Han, D.-H. Wang, D.-Z. Zhao, *J. Photochem. Photobiol. A: Chem.* **2018**, 356, 652-660.
- [11] M. Zhao, Y. Zhang, X. Zheng, Z. Li, S. Xu, *Inorg. Chem. Commun.* **2020**, 121, 108198.
