# Supplementary material for: A Quinoxaline−Naphthaldehyde Conjugate for Colorimetric Determination of Copper Ion
Source: MDPI journal article supplement (doi:10.3390/molecules27092908), 2022-05-03
Supplement: s1 [file s1]

## checkCIF/PLATON report

You have not supplied any structure factors. As a result the full set of tests cannot be run.

THIS REPORT IS FOR GUIDANCE ONLY. IF USED AS PART OF A REVIEW PROCEDURE FOR PUBLICATION, IT SHOULD NOT REPLACE THE EXPERTISE OF AN EXPERIENCED CRYSTALLOGRAPHIC REFEREE.

No syntax errors found.      CIF dictionary      Interpreting this report

### Datablock: QNHCu

---

Bond precision:    C-C = 0.0231 Å                      Wavelength=0.71073

Cell:                      a=14.067(4)                      b=15.587(4)                      c=15.601(4)  
                            alpha=106.091(7)                      beta=91.734(7)                      gamma=100.266(8)  
Temperature:    296 K

|                        | Calculated                          | Reported                   |
|------------------------|-------------------------------------|----------------------------|
| Volume                 | 3222.6(15)                          | 3222.4(14)                 |
| Space group            | P -1                                | P -1                       |
| Hall group             | -P 1                                | -P 1                       |
| Moiety formula         | 4(C32 H29 Cu N6 O3), 3(Cl O4), 2(O) | ?                          |
| Sum formula            | C128 H116 Cl3 Cu4 N24 O26           | C32 H30 Cl0.75 Cu N6 O6.50 |
| Mr                     | 2767.00                             | 692.75                     |
| Dx, g cm <sup>-3</sup> | 1.426                               | 1.428                      |
| Z                      | 1                                   | 4                          |
| Mu (mm <sup>-1</sup> ) | 0.795                               | 0.795                      |
| F000                   | 1427.0                              | 1431.0                     |
| F000'                  | 1429.27                             |                            |
| h, k, lmax             | 16, 18, 18                          | 16, 18, 18                 |
| Nref                   | 11366                               | 11126                      |
| Tmin, Tmax             | 0.853, 0.916                        | 0.853, 0.916               |
| Tmin'                  | 0.853                               |                            |

Correction method= # Reported T Limits: Tmin=0.853 Tmax=0.916  
AbsCorr = MULTI-SCAN

Data completeness= 0.979                      Theta(max)= 24.999

|                               |                                  |
|-------------------------------|----------------------------------|
| R(reflections)= 0.1842( 7896) | wR2(reflections)= 0.5019( 11126) |
| S = 2.051                     | Npar= 838                        |

---

The following ALERTS were generated. Each ALERT has the format

**test-name\_ALERT\_alert-type\_alert-level.**

Click on the hyperlinks for more details of the test.

---

### Alert level A

PLAT084\_ALERT\_3\_A High wR2 Value (i.e. > 0.25) ..... 0.50 Report

---

### Alert level B

PLAT082\_ALERT\_2\_B High R1 Value ..... 0.18 Report  
PLAT097\_ALERT\_2\_B Large Reported Max. (Positive) Residual Density 3.32 eA-3  
PLAT306\_ALERT\_2\_B Isolated Oxygen Atom (H-atoms Missing ?) ..... 01W Check  
PLAT341\_ALERT\_3\_B Low Bond Precision on C-C Bonds ..... 0.02312 Ang.

---

### Alert level C

DIFMX02\_ALERT\_1\_C The maximum difference density is > 0.1\*ZMAX\*0.75  
The relevant atom site should be identified.  
GOODF01\_ALERT\_2\_C The least squares goodness of fit parameter lies  
outside the range 0.80 <> 2.00  
Goodness of fit given = 2.051  
PLAT018\_ALERT\_1\_C \_diffrn\_measured\_fraction\_theta\_max .NE. \*\_full ! Check  
PLAT041\_ALERT\_1\_C Calc. and Reported SumFormula Strings Differ Please Check  
PLAT043\_ALERT\_1\_C Calculated and Reported Mol. Weight Differ by .. 4.00 Check  
PLAT068\_ALERT\_1\_C Reported F000 Differs from Calcd (or Missing)... Please Check  
PLAT087\_ALERT\_2\_C Unsatisfactory S value (Too High) ..... 2.05 Check  
PLAT094\_ALERT\_2\_C Ratio of Maximum / Minimum Residual Density .... 3.22 Report  
PLAT214\_ALERT\_2\_C Atom O1 (Anion/Solvent) ADP max/min Ratio 4.2 prolat  
PLAT220\_ALERT\_2\_C NonSolvent Resd 1 C Ueq(max)/Ueq(min) Range 4.1 Ratio  
PLAT220\_ALERT\_2\_C NonSolvent Resd 2 C Ueq(max)/Ueq(min) Range 4.1 Ratio  
PLAT222\_ALERT\_3\_C NonSolvent Resd 1 H Uiso(max)/Uiso(min) Range 4.7 Ratio  
PLAT222\_ALERT\_3\_C NonSolvent Resd 2 H Uiso(max)/Uiso(min) Range 4.7 Ratio  
PLAT234\_ALERT\_4\_C Large Hirshfeld Difference N6A --C30A . 0.18 Ang.  
PLAT234\_ALERT\_4\_C Large Hirshfeld Difference N6B --C30B . 0.19 Ang.  
PLAT241\_ALERT\_2\_C High 'MainMol' Ueq as Compared to Neighbors of C16A Check  
PLAT242\_ALERT\_2\_C Low 'MainMol' Ueq as Compared to Neighbors of N5A Check  
PLAT242\_ALERT\_2\_C Low 'MainMol' Ueq as Compared to Neighbors of N6A Check  
PLAT242\_ALERT\_2\_C Low 'MainMol' Ueq as Compared to Neighbors of N5B Check  
PLAT242\_ALERT\_2\_C Low 'MainMol' Ueq as Compared to Neighbors of N6B Check  
PLAT260\_ALERT\_2\_C Large Average Ueq of Residue Including C12 0.159 Check  
PLAT260\_ALERT\_2\_C Large Average Ueq of Residue Including C11 0.212 Check  
PLAT410\_ALERT\_2\_C Short Intra H...H Contact H8A ..H11A . 1.96 Ang.  
x,y,z = 1\_555 Check  
PLAT410\_ALERT\_2\_C Short Intra H...H Contact H8B ..H11B . 1.98 Ang.  
x,y,z = 1\_555 Check  
PLAT413\_ALERT\_2\_C Short Inter XH3 .. XHn H7A ..H32A . 2.13 Ang.  
x,l+y,z = 1\_565 Check  
PLAT601\_ALERT\_2\_C Unit Cell Contains Solvent Accessible VOIDS of . 86 Ang\*\*3

---

### Alert level G

FORMU01\_ALERT\_2\_G There is a discrepancy between the atom counts in the  
\_chemical\_formula\_sum and the formula from the \_atom\_site\* data.  
Atom count from \_chemical\_formula\_sum:C32 H30 Cl0.75 Cu1 N6 O6.5

Atom count from the \_atom\_site data: C32 H29 Cl0.75 Cu1 N6 O6.5  
 CELLZ01\_ALERT\_1\_G Difference between formula and atom\_site contents detected.  
 CELLZ01\_ALERT\_1\_G WARNING: H atoms missing from atom site list. Is this intentional?  
 From the CIF: \_cell\_formula\_units\_Z 4  
 From the CIF: \_chemical\_formula\_sum C32 H30 Cl0.75 Cu N6 O6.50  
 TEST: Compare cell contents of formula and atom\_site data

| atom | Z*formula | cif sites | diff |
|------|-----------|-----------|------|
| C    | 128.00    | 128.00    | 0.00 |
| H    | 120.00    | 116.00    | 4.00 |
| Cl   | 3.00      | 3.00      | 0.00 |
| Cu   | 4.00      | 4.00      | 0.00 |
| N    | 24.00     | 24.00     | 0.00 |
| O    | 26.00     | 26.00     | 0.00 |

|                   |                                                  |                |           |
|-------------------|--------------------------------------------------|----------------|-----------|
| PLAT003_ALERT_2_G | Number of Uiso or Uij Restrained non-H Atoms ... | 2              | Report    |
| PLAT045_ALERT_1_G | Calculated and Reported Z Differ by a Factor ... | 0.250          | Check     |
| PLAT066_ALERT_1_G | Predicted and Reported Tmin&Tmax Range Identical | ?              | Check     |
| PLAT186_ALERT_4_G | The CIF-Embedded .res File Contains ISOR Records | 1              | Report    |
| PLAT244_ALERT_4_G | Low 'Solvent' Ueq as Compared to Neighbors of    | C11            | Check     |
| PLAT300_ALERT_4_G | Atom Site Occupancy of O5                        | Constrained at | 0.5 Check |
| PLAT300_ALERT_4_G | Atom Site Occupancy of O6                        | Constrained at | 0.5 Check |
| PLAT300_ALERT_4_G | Atom Site Occupancy of O7                        | Constrained at | 0.5 Check |
| PLAT300_ALERT_4_G | Atom Site Occupancy of O8                        | Constrained at | 0.5 Check |
| PLAT302_ALERT_4_G | Anion/Solvent/Minor-Residue Disorder (Resd 3 )   | 80%            | Note      |
| PLAT333_ALERT_2_G | Large Aver C6-Ring C-C Dist C1B -C10B            | 1.42           | Ang.      |
| PLAT380_ALERT_4_G | Incorrectly? Oriented X(sp2)-Methyl Moiety ..... | C28A           | Check     |
| PLAT380_ALERT_4_G | Incorrectly? Oriented X(sp2)-Methyl Moiety ..... | C29A           | Check     |
| PLAT380_ALERT_4_G | Incorrectly? Oriented X(sp2)-Methyl Moiety ..... | C28B           | Check     |
| PLAT380_ALERT_4_G | Incorrectly? Oriented X(sp2)-Methyl Moiety ..... | C29B           | Check     |
| PLAT721_ALERT_1_G | Bond Calc 0.97000, Rep 0.96000 Dev...            | 0.01           | Ang.      |
|                   | C32B -H32B 1_555 1_555 .....                     | # 155          | Check     |
| PLAT779_ALERT_4_G | Suspect or Irrelevant (Bond) Angle(s) in CIF ... | 42.00          | Deg.      |
|                   | O6 -O8 -CL2 2_766 1_555 1_555 .....              | # 313          | Check     |
| PLAT794_ALERT_5_G | Tentative Bond Valency for Cu1A (II)             | 2.22           | Info      |
| PLAT794_ALERT_5_G | Tentative Bond Valency for Cu1B (II)             | 2.13           | Info      |
| PLAT860_ALERT_3_G | Number of Least-Squares Restraints .....         | 12             | Note      |
| PLAT870_ALERT_4_G | ALERTS Related to Twinning Effects Suppressed .. | !              | Info      |
| PLAT941_ALERT_3_G | Average HKL Measurement Multiplicity .....       | 2.4            | Low       |
| PLAT967_ALERT_5_G | Note: Two-Theta Cutoff Value in Embedded .res .. | 50.0           | Degree    |

---

1 **ALERT level A** = Most likely a serious problem - resolve or explain  
 4 **ALERT level B** = A potentially serious problem, consider carefully  
 26 **ALERT level C** = Check. Ensure it is not caused by an omission or oversight  
 26 **ALERT level G** = General information/check it is not something unexpected

10 ALERT type 1 CIF construction/syntax error, inconsistent or missing data  
 23 ALERT type 2 Indicator that the structure model may be wrong or deficient  
 6 ALERT type 3 Indicator that the structure quality may be low  
 15 ALERT type 4 Improvement, methodology, query or suggestion  
 3 ALERT type 5 Informative message, check

---

It is advisable to attempt to resolve as many as possible of the alerts in all categories. Often the minor alerts point to easily fixed oversights, errors and omissions in your CIF or refinement strategy, so attention to these fine details can be worthwhile. In order to resolve some of the more serious problems it may be necessary to carry out additional measurements or structure refinements. However, the purpose of your study may justify the reported deviations and the more serious of these should normally be commented upon in the discussion or experimental section of a paper or in the "special\_details" fields of the CIF. checkCIF was carefully designed to identify outliers and unusual parameters, but every test has its limitations and alerts that are not important in a particular case may appear. Conversely, the absence of alerts does not guarantee there are no aspects of the results needing attention. It is up to the individual to critically assess their own results and, if necessary, seek expert advice.

### **Publication of your CIF in IUCr journals**

A basic structural check has been run on your CIF. These basic checks will be run on all CIFs submitted for publication in IUCr journals (*Acta Crystallographica*, *Journal of Applied Crystallography*, *Journal of Synchrotron Radiation*); however, if you intend to submit to *Acta Crystallographica Section C* or *E* or *IUCrData*, you should make sure that full publication checks are run on the final version of your CIF prior to submission.

### **Publication of your CIF in other journals**

Please refer to the *Notes for Authors* of the relevant journal for any special instructions relating to CIF submission.

PLATON-Mar 2 14:22:05 2022 - (190222)

Z -132 QNHCU

P -1

$$R = 0.18$$

RES= 0-115 X

NO MOVE FORCED

```

Prob = 50
Temp = 296

```
