# Supplementary material for: A Quinoxaline−Naphthaldehyde Conjugate for Colorimetric Determination of Copper Ion
Source: Molecules. 2022 May 3;27(9):2908. doi: 10.3390/molecules27092908 (PMC9105850; doi:10.3390/molecules27092908)
Supplement: Supplementary file 1 [file molecules-27-02908-s001.zip]

Archive with 5 entries (5 files):
- 2156635.cif
- 2156636.cif
- checkcif_2156635.pdf
- checkcif_2156636.pdf
- ESI_molecules-1648806.pdf
