# Supplementary material for: A Quinoxaline−Naphthaldehyde Conjugate for Colorimetric Determination of Copper Ion
Source: Molecules. 2022 May 3;27(9):2908. doi: 10.3390/molecules27092908 (PMC9105850; doi:10.3390/molecules27092908)
Supplement: Supplementary file 1 [file molecules-27-02908-s001.zip › 2156635.cif]

####################################################################### 
# 
# This file contains crystal structure data downloaded from the 
# Cambridge Structural Database (CSD) hosted by the Cambridge 
# Crystallographic Data Centre (CCDC).
# 
# Full information about CCDC data access policies and citation 
# guidelines are available at http://www.ccdc.cam.ac.uk/access/V1 
# 
# Audit and citation data items may have been added by the CCDC. 
# Please retain this information to preserve the provenance of 
# this file and to allow appropriate attribution of the data. 
# 
#######################################################################

data_QNH
_database_code_depnum_ccdc_archive 'CCDC 2156635'
loop_
_audit_author_name
_audit_author_address
'Sutapa Sahu'
;University of Calcutta
India
;
_audit_update_record             
;
2022-03-05 deposited with the CCDC.	2022-04-19 downloaded from the CCDC.
;

_audit_creation_method           SHELXL-2016/6
_shelx_SHELXL_version_number     2016/6
_chemical_name_systematic        ?
_chemical_name_common            ?
_chemical_melting_point          ?
_chemical_formula_moiety         ?
_chemical_formula_sum            'C26.50 H16.50 Cl1.50 N4 O'
_chemical_formula_weight         460.11

loop_
_atom_type_symbol
_atom_type_description
_atom_type_scat_dispersion_real
_atom_type_scat_dispersion_imag
_atom_type_scat_source
C C 0.0033 0.0016 'International Tables Vol C Tables 4.2.6.8 and 6.1.1.4'
H H 0.0000 0.0000 'International Tables Vol C Tables 4.2.6.8 and 6.1.1.4'
N N 0.0061 0.0033 'International Tables Vol C Tables 4.2.6.8 and 6.1.1.4'
O O 0.0106 0.0060 'International Tables Vol C Tables 4.2.6.8 and 6.1.1.4'
Cl Cl 0.1484 0.1585 'International Tables Vol C Tables 4.2.6.8 and 6.1.1.4'

_space_group_crystal_system      tetragonal
_space_group_IT_number           88
_space_group_name_H-M_alt        'I 41/a'
_space_group_name_Hall           '-I 4ad'

_shelx_space_group_comment       
;
The symmetry employed for this shelxl refinement is uniquely defined
by the following loop, which should always be used as a source of
symmetry information in preference to the above space-group names.
They are only intended as comments.
;

loop_
_space_group_symop_operation_xyz
'x, y, z'
'-y+1/4, x+3/4, z+3/4'
'y+1/4, -x+1/4, z+1/4'
'-x, -y+1/2, z'
'x+1/2, y+1/2, z+1/2'
'-y+3/4, x+5/4, z+5/4'
'y+3/4, -x+3/4, z+3/4'
'-x+1/2, -y+1, z+1/2'
'-x, -y, -z'
'y-1/4, -x-3/4, -z-3/4'
'-y-1/4, x-1/4, -z-1/4'
'x, y-1/2, -z'
'-x+1/2, -y+1/2, -z+1/2'
'y+1/4, -x-1/4, -z-1/4'
'-y+1/4, x+1/4, -z+1/4'
'x+1/2, y, -z+1/2'

_cell_length_a                   16.455(2)
_cell_length_b                   16.455(2)
_cell_length_c                   33.088(9)
_cell_angle_alpha                90
_cell_angle_beta                 90
_cell_angle_gamma                90
_cell_volume                     8959(3)
_cell_formula_units_Z            16
_cell_measurement_temperature    296(2)
_cell_measurement_reflns_used    3383
_cell_measurement_theta_min      1.3
_cell_measurement_theta_max      23.7

_exptl_crystal_description       rectangular
_exptl_crystal_colour            orange
_exptl_crystal_density_meas      ?
_exptl_crystal_density_method    'not measured'
_exptl_crystal_density_diffrn    1.365
_exptl_crystal_F_000             3792
_exptl_transmission_factor_min   ?
_exptl_transmission_factor_max   ?
_exptl_crystal_size_max          0.19
_exptl_crystal_size_mid          0.17
_exptl_crystal_size_min          0.12
_exptl_absorpt_coefficient_mu    0.258
_shelx_estimated_absorpt_T_min   ?
_shelx_estimated_absorpt_T_max   ?
_exptl_absorpt_correction_type   multi-scan
_exptl_absorpt_correction_T_min  0.952
_exptl_absorpt_correction_T_max  0.970
_exptl_absorpt_process_details   SADABS(Sheldrick,2008)
_exptl_absorpt_special_details   ?
_diffrn_ambient_temperature      296(2)
_diffrn_radiation_wavelength     0.71073
_diffrn_radiation_type           MoK\a
_diffrn_source                   'fine-focus sealed tube'
_diffrn_measurement_device_type  'Bruker Apex II'
_diffrn_measurement_method       'phi and omega scan'
_diffrn_detector_area_resol_mean ?
_diffrn_reflns_number            19954
_diffrn_reflns_av_unetI/netI     0.0727
_diffrn_reflns_av_R_equivalents  0.0928
_diffrn_reflns_limit_h_min       -18
_diffrn_reflns_limit_h_max       17
_diffrn_reflns_limit_k_min       -18
_diffrn_reflns_limit_k_max       18
_diffrn_reflns_limit_l_min       -35
_diffrn_reflns_limit_l_max       37
_diffrn_reflns_theta_min         1.382
_diffrn_reflns_theta_max         23.799
_diffrn_reflns_theta_full        23.799
_diffrn_measured_fraction_theta_max 0.985
_diffrn_measured_fraction_theta_full 0.985
_diffrn_reflns_Laue_measured_fraction_max 0.985
_diffrn_reflns_Laue_measured_fraction_full 0.985
_diffrn_reflns_point_group_measured_fraction_max 0.985
_diffrn_reflns_point_group_measured_fraction_full 0.985
_reflns_number_total             3383
_reflns_number_gt                1630
_reflns_threshold_expression     'I > 2\s(I)'
_reflns_Friedel_coverage         0.000
_reflns_Friedel_fraction_max     .
_reflns_Friedel_fraction_full    .

_reflns_special_details          
;
 Reflections were merged by SHELXL according to the crystal
 class for the calculation of statistics and refinement.
 
 _reflns_Friedel_fraction is defined as the number of unique
 Friedel pairs measured divided by the number that would be
 possible theoretically, ignoring centric projections and
 systematic absences.
;

_computing_data_collection       ?
_computing_cell_refinement       ?
_computing_data_reduction        ?
_computing_structure_solution    'SHELXT 2014/5 (Sheldrick, 2014)'
_computing_structure_refinement  'SHELXL-2016/6 (Sheldrick, 2016)'
_computing_molecular_graphics    ?
_computing_publication_material  ?
_refine_special_details          ?
_refine_ls_structure_factor_coef Fsqd
_refine_ls_matrix_type           full
_refine_ls_weighting_scheme      calc
_refine_ls_weighting_details     
'w=1/[\s^2^(Fo^2^)+(0.2000P)^2^] where P=(Fo^2^+2Fc^2^)/3'
_atom_sites_solution_primary     direct
_atom_sites_solution_secondary   difmap
_atom_sites_solution_hydrogens   mixed
_refine_ls_hydrogen_treatment    mixed
_refine_ls_extinction_method     none
_refine_ls_extinction_coef       .
_refine_ls_number_reflns         3383
_refine_ls_number_parameters     319
_refine_ls_number_restraints     12
_refine_ls_R_factor_all          0.1861
_refine_ls_R_factor_gt           0.1034
_refine_ls_wR_factor_ref         0.3480
_refine_ls_wR_factor_gt          0.3079
_refine_ls_goodness_of_fit_ref   1.083
_refine_ls_restrained_S_all      1.116
_refine_ls_shift/su_max          0.005
_refine_ls_shift/su_mean         0.001

loop_
_atom_site_label
_atom_site_type_symbol
_atom_site_fract_x
_atom_site_fract_y
_atom_site_fract_z
_atom_site_U_iso_or_equiv
_atom_site_adp_type
_atom_site_occupancy
_atom_site_site_symmetry_order
_atom_site_calc_flag
_atom_site_refinement_flags_posn
_atom_site_refinement_flags_adp
_atom_site_refinement_flags_occupancy
_atom_site_disorder_assembly
_atom_site_disorder_group
C1 C 0.2114(4) 0.3842(4) 0.2860(2) 0.0839(18) Uani 1 1 d . . . . .
C2 C 0.2507(4) 0.4458(4) 0.3115(2) 0.093(2) Uani 1 1 d . . . . .
H2 H 0.247221 0.442734 0.339504 0.112 Uiso 1 1 calc R U . . .
C3 C 0.2913(5) 0.5064(5) 0.2939(2) 0.100(2) Uani 1 1 d . . . . .
H3 H 0.315012 0.545405 0.310419 0.120 Uiso 1 1 calc R U . . .
C4 C 0.3007(4) 0.5149(5) 0.2517(2) 0.096(2) Uani 1 1 d . . . . .
C5 C 0.3449(5) 0.5810(4) 0.2336(3) 0.108(2) Uani 1 1 d . . . . .
H5 H 0.368812 0.620267 0.249962 0.129 Uiso 1 1 calc R U . . .
C6 C 0.3517(5) 0.5859(5) 0.1946(3) 0.115(3) Uani 1 1 d . . . . .
H6 H 0.380359 0.629155 0.183416 0.138 Uiso 1 1 calc R U . . .
C7 C 0.3170(5) 0.5277(5) 0.1688(3) 0.109(2) Uani 1 1 d . . . . .
H7 H 0.324017 0.532348 0.141013 0.131 Uiso 1 1 calc R U . . .
C8 C 0.2744(4) 0.4661(4) 0.18363(19) 0.0811(18) Uani 1 1 d . . . . .
H8 H 0.251201 0.428510 0.166078 0.097 Uiso 1 1 calc R U . . .
C9 C 0.2637(4) 0.4567(4) 0.2262(2) 0.0843(19) Uani 1 1 d . . . . .
C10 C 0.2182(3) 0.3892(3) 0.24479(17) 0.0613(14) Uani 1 1 d . . . . .
C11 C 0.1795(4) 0.3314(4) 0.21867(19) 0.0818(18) Uani 1 1 d . . . . .
H11 H 0.183098 0.336236 0.190723 0.098 Uiso 1 1 calc R U . . .
C12 C 0.0621(3) 0.1598(4) 0.22284(17) 0.0686(15) Uani 1 1 d . . . . .
C13 C 0.0220(3) 0.1008(4) 0.1966(2) 0.0768(17) Uani 1 1 d . . . . .
C14 C 0.0176(4) 0.0959(4) 0.15513(19) 0.0865(19) Uani 1 1 d . . . . .
H14 H 0.042965 0.134636 0.139027 0.104 Uiso 1 1 calc R U . . .
C15 C -0.0244(4) 0.0338(4) 0.13812(19) 0.0892(19) Uani 1 1 d . . . . .
H15 H -0.027160 0.029796 0.110123 0.107 Uiso 1 1 calc R U . . .
C16 C -0.0629(4) -0.0234(4) 0.1617(2) 0.093(2) Uani 1 1 d . . . . .
H16 H -0.091408 -0.065255 0.149236 0.111 Uiso 1 1 calc R U . . .
C17 C -0.0605(4) -0.0203(4) 0.2033(2) 0.0830(18) Uani 1 1 d . . . . .
H17 H -0.086438 -0.059572 0.218843 0.100 Uiso 1 1 calc R U . . .
C18 C -0.0183(3) 0.0429(4) 0.22111(17) 0.0707(16) Uani 1 1 d . . . . .
C19 C -0.0044(4) 0.0648(4) 0.26340(19) 0.0811(18) Uani 1 1 d . . . . .
C20 C -0.0076(4) 0.0672(4) 0.33148(17) 0.0766(17) Uani 1 1 d . . . . .
C21 C -0.0365(5) 0.0309(4) 0.3666(2) 0.099(2) Uani 1 1 d . . . . .
H21 H -0.069739 -0.014783 0.365447 0.119 Uiso 1 1 calc R U . . .
C22 C -0.0143(6) 0.0647(6) 0.4031(2) 0.128(3) Uani 1 1 d . . . . .
H22 H -0.032066 0.041105 0.427098 0.153 Uiso 1 1 calc R U . . .
C23 C 0.0349(6) 0.1347(6) 0.4044(2) 0.120(3) Uani 1 1 d . . . . .
H23 H 0.049600 0.156579 0.429235 0.144 Uiso 1 1 calc R U . . .
C24 C 0.0613(4) 0.1707(5) 0.3699(2) 0.102(2) Uani 1 1 d . . . . .
H24 H 0.092837 0.217553 0.371042 0.122 Uiso 1 1 calc R U . . .
C25 C 0.0410(4) 0.1370(4) 0.33328(19) 0.0817(17) Uani 1 1 d . . . . .
C26 C 0.0450(3) 0.1388(3) 0.26403(19) 0.0685(15) Uani 1 1 d . . . . .
N1 N 0.1392(3) 0.2716(3) 0.23526(14) 0.0816(15) Uani 1 1 d . . . . .
N2 N 0.1041(3) 0.2198(3) 0.20646(14) 0.0841(15) Uani 1 1 d . . . . .
N3 N 0.0683(3) 0.1742(3) 0.29776(16) 0.0816(15) Uani 1 1 d . . . . .
N4 N -0.0303(3) 0.0307(3) 0.29451(17) 0.0905(16) Uani 1 1 d . . . . .
O1 O 0.1727(3) 0.3264(3) 0.30553(12) 0.0914(13) Uani 1 1 d . . . . .
Cl3 Cl -0.0062(15) -0.244(2) 0.26288(18) 0.208(5) Uani 0.5 1 d . . P . .
Cl1 Cl -0.1685(4) -0.1783(4) 0.2685(2) 0.187(2) Uani 0.5 1 d . . P . .
Cl2 Cl -0.0811(5) -0.1957(4) 0.33996(17) 0.204(3) Uani 0.5 1 d . U P . .
C30 C -0.0787(9) -0.1653(9) 0.2915(4) 0.106(4) Uani 0.5 1 d . U P . .
H30 H -0.059080 -0.109316 0.288900 0.127 Uiso 0.5 1 calc R U P . .
H1 H 0.148(4) 0.273(4) 0.281(2) 0.127 Uiso 1 1 d . U . . .

loop_
_atom_site_aniso_label
_atom_site_aniso_U_11
_atom_site_aniso_U_22
_atom_site_aniso_U_33
_atom_site_aniso_U_23
_atom_site_aniso_U_13
_atom_site_aniso_U_12
C1 0.084(5) 0.086(5) 0.082(5) 0.001(4) -0.008(4) 0.021(4)
C2 0.116(6) 0.089(5) 0.075(4) -0.010(4) -0.023(4) -0.004(4)
C3 0.103(5) 0.090(5) 0.106(6) -0.019(4) -0.027(4) 0.008(4)
C4 0.080(5) 0.094(5) 0.116(6) -0.011(5) -0.023(4) 0.018(4)
C5 0.098(6) 0.075(5) 0.151(8) 0.018(5) -0.001(5) -0.019(4)
C6 0.097(6) 0.095(6) 0.153(8) 0.021(6) -0.010(6) -0.023(4)
C7 0.106(6) 0.098(6) 0.123(6) 0.013(5) 0.003(5) -0.001(5)
C8 0.086(5) 0.077(4) 0.081(4) 0.012(3) -0.008(3) 0.000(4)
C9 0.060(4) 0.077(4) 0.115(6) -0.014(4) -0.021(4) 0.022(3)
C10 0.062(4) 0.052(3) 0.070(4) -0.006(3) -0.015(3) 0.005(3)
C11 0.074(4) 0.085(5) 0.086(4) 0.010(4) 0.001(3) 0.009(4)
C12 0.069(4) 0.063(4) 0.074(4) -0.009(3) -0.008(3) 0.000(3)
C13 0.064(4) 0.065(4) 0.102(5) -0.006(4) -0.004(3) 0.006(3)
C14 0.096(5) 0.095(5) 0.069(4) -0.007(3) -0.001(3) -0.014(4)
C15 0.095(5) 0.105(5) 0.068(4) -0.008(4) -0.003(3) -0.017(4)
C16 0.092(5) 0.096(5) 0.090(5) -0.034(4) -0.003(4) -0.006(4)
C17 0.079(4) 0.082(4) 0.088(5) -0.006(3) 0.005(3) 0.000(3)
C18 0.064(4) 0.078(4) 0.070(4) -0.015(3) -0.006(3) 0.012(3)
C19 0.070(4) 0.095(5) 0.078(5) 0.006(4) 0.003(3) 0.017(4)
C20 0.088(4) 0.084(5) 0.058(4) 0.004(3) -0.007(3) 0.017(4)
C21 0.125(6) 0.104(5) 0.067(4) 0.000(4) 0.002(4) -0.003(4)
C22 0.158(8) 0.136(7) 0.089(6) 0.027(5) 0.017(5) 0.022(6)
C23 0.154(8) 0.139(7) 0.065(5) -0.023(5) -0.027(5) 0.040(6)
C24 0.117(6) 0.099(5) 0.089(5) -0.008(4) -0.008(4) 0.013(4)
C25 0.087(5) 0.080(5) 0.078(5) 0.000(4) -0.009(4) 0.014(4)
C26 0.057(3) 0.062(4) 0.087(4) -0.012(3) -0.009(3) 0.005(3)
N1 0.095(4) 0.074(3) 0.076(3) -0.012(3) -0.011(3) -0.001(3)
N2 0.089(4) 0.089(4) 0.074(3) -0.011(3) -0.008(3) -0.003(3)
N3 0.079(3) 0.078(3) 0.087(4) 0.004(3) 0.002(3) 0.008(3)
N4 0.085(4) 0.098(4) 0.089(4) 0.018(3) 0.008(3) 0.015(3)
O1 0.104(3) 0.092(3) 0.079(3) 0.003(3) -0.012(2) -0.005(3)
Cl3 0.160(8) 0.238(11) 0.225(5) -0.056(16) 0.066(11) -0.082(7)
Cl1 0.159(5) 0.175(5) 0.228(6) 0.052(4) 0.020(4) 0.017(4)
Cl2 0.316(7) 0.169(5) 0.129(4) 0.002(3) 0.008(4) -0.045(5)
C30 0.115(6) 0.104(6) 0.099(6) 0.000(4) -0.004(4) -0.007(5)

_geom_special_details            
;
 All esds (except the esd in the dihedral angle between two l.s. planes)
 are estimated using the full covariance matrix.  The cell esds are taken
 into account individually in the estimation of esds in distances, angles
 and torsion angles; correlations between esds in cell parameters are only
 used when they are defined by crystal symmetry.  An approximate (isotropic)
 treatment of cell esds is used for estimating esds involving l.s. planes.
;

loop_
_geom_bond_atom_site_label_1
_geom_bond_atom_site_label_2
_geom_bond_distance
_geom_bond_site_symmetry_2
_geom_bond_publ_flag
C1 O1 1.314(7) . ?
C1 C10 1.372(8) . ?
C1 C2 1.468(9) . ?
C2 C3 1.334(9) . ?
C2 H2 0.9300 . ?
C3 C4 1.411(10) . ?
C3 H3 0.9300 . ?
C4 C9 1.414(9) . ?
C4 C5 1.438(10) . ?
C5 C6 1.299(10) . ?
C5 H5 0.9300 . ?
C6 C7 1.404(10) . ?
C6 H6 0.9300 . ?
C7 C8 1.327(9) . ?
C7 H7 0.9300 . ?
C8 C9 1.427(9) . ?
C8 H8 0.9300 . ?
C9 C10 1.475(8) . ?
C10 C11 1.434(8) . ?
C11 N1 1.307(7) . ?
C11 H11 0.9300 . ?
C12 N2 1.322(7) . ?
C12 C26 1.434(8) . ?
C12 C13 1.460(8) . ?
C13 C14 1.376(9) . ?
C13 C18 1.416(8) . ?
C14 C15 1.355(8) . ?
C14 H14 0.9300 . ?
C15 C16 1.378(8) . ?
C15 H15 0.9300 . ?
C16 C17 1.375(9) . ?
C16 H16 0.9300 . ?
C17 C18 1.384(8) . ?
C17 H17 0.9300 . ?
C18 C19 1.463(8) . ?
C19 N4 1.248(7) . ?
C19 C26 1.464(9) . ?
C20 C21 1.390(8) . ?
C20 C25 1.400(9) . ?
C20 N4 1.413(8) . ?
C21 C22 1.380(10) . ?
C21 H21 0.9300 . ?
C22 C23 1.409(12) . ?
C22 H22 0.9300 . ?
C23 C24 1.357(10) . ?
C23 H23 0.9300 . ?
C24 C25 1.374(9) . ?
C24 H24 0.9300 . ?
C25 N3 1.399(8) . ?
C26 N3 1.316(7) . ?
N1 N2 1.403(6) . ?
O1 H1 1.26(8) . ?
Cl3 Cl3 0.28(6) 4_545 ?
Cl3 C30 2.00(3) . ?
Cl3 C30 2.25(3) 4_545 ?
Cl1 C30 1.676(15) . ?
Cl2 C30 1.680(15) . ?
C30 H30 0.9800 . ?

loop_
_geom_angle_atom_site_label_1
_geom_angle_atom_site_label_2
_geom_angle_atom_site_label_3
_geom_angle
_geom_angle_site_symmetry_1
_geom_angle_site_symmetry_3
_geom_angle_publ_flag
O1 C1 C10 124.8(6) . . ?
O1 C1 C2 115.6(6) . . ?
C10 C1 C2 119.5(7) . . ?
C3 C2 C1 119.1(6) . . ?
C3 C2 H2 120.5 . . ?
C1 C2 H2 120.5 . . ?
C2 C3 C4 124.2(7) . . ?
C2 C3 H3 117.9 . . ?
C4 C3 H3 117.9 . . ?
C3 C4 C9 118.4(7) . . ?
C3 C4 C5 122.8(8) . . ?
C9 C4 C5 118.8(8) . . ?
C6 C5 C4 120.3(8) . . ?
C6 C5 H5 119.9 . . ?
C4 C5 H5 119.9 . . ?
C5 C6 C7 121.8(8) . . ?
C5 C6 H6 119.1 . . ?
C7 C6 H6 119.1 . . ?
C8 C7 C6 120.8(8) . . ?
C8 C7 H7 119.6 . . ?
C6 C7 H7 119.6 . . ?
C7 C8 C9 120.8(7) . . ?
C7 C8 H8 119.6 . . ?
C9 C8 H8 119.6 . . ?
C4 C9 C8 117.6(7) . . ?
C4 C9 C10 118.7(6) . . ?
C8 C9 C10 123.8(6) . . ?
C1 C10 C11 121.6(6) . . ?
C1 C10 C9 120.2(6) . . ?
C11 C10 C9 118.3(5) . . ?
N1 C11 C10 118.1(6) . . ?
N1 C11 H11 120.9 . . ?
C10 C11 H11 120.9 . . ?
N2 C12 C26 132.3(5) . . ?
N2 C12 C13 119.3(5) . . ?
C26 C12 C13 108.5(5) . . ?
C14 C13 C18 120.5(5) . . ?
C14 C13 C12 131.0(6) . . ?
C18 C13 C12 108.5(6) . . ?
C15 C14 C13 119.0(6) . . ?
C15 C14 H14 120.5 . . ?
C13 C14 H14 120.5 . . ?
C14 C15 C16 120.9(6) . . ?
C14 C15 H15 119.5 . . ?
C16 C15 H15 119.5 . . ?
C17 C16 C15 121.9(6) . . ?
C17 C16 H16 119.1 . . ?
C15 C16 H16 119.1 . . ?
C16 C17 C18 117.9(6) . . ?
C16 C17 H17 121.0 . . ?
C18 C17 H17 121.0 . . ?
C17 C18 C13 119.7(5) . . ?
C17 C18 C19 132.2(6) . . ?
C13 C18 C19 108.0(5) . . ?
N4 C19 C18 128.7(7) . . ?
N4 C19 C26 123.5(6) . . ?
C18 C19 C26 107.8(6) . . ?
C21 C20 C25 120.9(6) . . ?
C21 C20 N4 116.7(6) . . ?
C25 C20 N4 122.4(5) . . ?
C22 C21 C20 117.9(7) . . ?
C22 C21 H21 121.0 . . ?
C20 C21 H21 121.0 . . ?
C21 C22 C23 120.5(7) . . ?
C21 C22 H22 119.8 . . ?
C23 C22 H22 119.8 . . ?
C24 C23 C22 121.1(7) . . ?
C24 C23 H23 119.5 . . ?
C22 C23 H23 119.5 . . ?
C23 C24 C25 119.2(8) . . ?
C23 C24 H24 120.4 . . ?
C25 C24 H24 120.4 . . ?
C24 C25 N3 119.1(7) . . ?
C24 C25 C20 120.5(7) . . ?
N3 C25 C20 120.4(6) . . ?
N3 C26 C12 129.9(6) . . ?
N3 C26 C19 122.9(6) . . ?
C12 C26 C19 107.2(5) . . ?
C11 N1 N2 112.4(5) . . ?
C12 N2 N1 113.0(5) . . ?
C26 N3 C25 115.1(5) . . ?
C19 N4 C20 115.6(6) . . ?
C1 O1 H1 111(3) . . ?
Cl3 Cl3 C30 151(2) 4_545 . ?
Cl3 Cl3 C30 25(2) 4_545 4_545 ?
C30 Cl3 C30 126.9(9) . 4_545 ?
Cl1 C30 Cl2 112.0(9) . . ?
Cl1 C30 Cl3 103.1(10) . . ?
Cl2 C30 Cl3 105.8(11) . . ?
Cl1 C30 H30 111.8 . . ?
Cl2 C30 H30 111.8 . . ?
Cl3 C30 H30 111.8 . . ?

loop_
_geom_hbond_atom_site_label_D
_geom_hbond_atom_site_label_H
_geom_hbond_atom_site_label_A
_geom_hbond_distance_DH
_geom_hbond_distance_HA
_geom_hbond_distance_DA
_geom_hbond_angle_DHA
_geom_hbond_site_symmetry_A
C30 H30 N4 0.98 2.36 3.323(17) 167.7 .
O1 H1 N1 1.26(8) 1.53(7) 2.554(6) 132(5) .
O1 H1 N2 1.26(8) 2.72(8) 3.885(6) 153(4) .
O1 H1 N3 1.26(8) 2.15(7) 3.047(7) 124(4) .

_refine_diff_density_max         0.584
_refine_diff_density_min         -0.400
_refine_diff_density_rms         0.061

_shelx_res_file                  
;
TITL TP_a.res in I4(1)/a
    shelx.res
    created by SHELXL-2016/6 at 10:21:07 on 13-Apr-2021
CELL  0.71073  16.4548  16.4548  33.0881   90.000   90.000   90.000
ZERR    16.00   0.0021   0.0021   0.0087    0.000    0.000    0.000
LATT   2
SYMM  1/4 - Y, 3/4 + X, 3/4 + Z
SYMM  1/4 + Y, 1/4 - X, 1/4 + Z
SYMM  - X, 1/2 - Y,   Z
SFAC  C    H    N    O    CL
UNIT  424 264 64 16 24
MERG   2
OMIT     0.00  50.00
isor 0.005 cl2  c30
HTAB C30 N4
HTAB N1 O1
HTAB O1 N1
HTAB O1 N2
HTAB O1 N3
free c30 cl3_$1
eqiv  $1   -x, -y-1/2, z

FMAP   2
PLAN   20
ACTA
HTAB    2.00000
BOND   $H
L.S.   12
TEMP    23.00
WGHT    0.200000
FVAR       0.09914
C1    1    0.211408    0.384176    0.286046    11.00000    0.08371    0.08590 =
         0.08208    0.00137   -0.00752    0.02093
C2    1    0.250653    0.445826    0.311491    11.00000    0.11567    0.08854 =
         0.07487   -0.00952   -0.02308   -0.00432
AFIX  43
H2    2    0.247221    0.442734    0.339504    11.00000   -1.20000
AFIX   0
C3    1    0.291323    0.506367    0.293856    11.00000    0.10315    0.08967 =
         0.10596   -0.01939   -0.02712    0.00761
AFIX  43
H3    2    0.315012    0.545405    0.310419    11.00000   -1.20000
AFIX   0
C4    1    0.300676    0.514927    0.251679    11.00000    0.07952    0.09368 =
         0.11578   -0.01099   -0.02316    0.01777
C5    1    0.344949    0.580951    0.233626    11.00000    0.09756    0.07488 =
         0.15121    0.01816   -0.00079   -0.01899
AFIX  43
H5    2    0.368812    0.620267    0.249962    11.00000   -1.20000
AFIX   0
C6    1    0.351746    0.585899    0.194586    11.00000    0.09681    0.09537 =
         0.15285    0.02074   -0.01031   -0.02324
AFIX  43
H6    2    0.380359    0.629155    0.183416    11.00000   -1.20000
AFIX   0
C7    1    0.317039    0.527672    0.168808    11.00000    0.10587    0.09828 =
         0.12347    0.01269    0.00309   -0.00087
AFIX  43
H7    2    0.324017    0.532348    0.141013    11.00000   -1.20000
AFIX   0
C8    1    0.274406    0.466062    0.183631    11.00000    0.08583    0.07662 =
         0.08083    0.01179   -0.00831    0.00033
AFIX  43
H8    2    0.251201    0.428510    0.166078    11.00000   -1.20000
AFIX   0
C9    1    0.263724    0.456716    0.226177    11.00000    0.06042    0.07723 =
         0.11520   -0.01426   -0.02142    0.02239
C10   1    0.218150    0.389231    0.244792    11.00000    0.06204    0.05222 =
         0.06979   -0.00630   -0.01460    0.00548
C11   1    0.179544    0.331374    0.218670    11.00000    0.07406    0.08506 =
         0.08616    0.00997    0.00069    0.00863
AFIX  43
H11   2    0.183098    0.336236    0.190723    11.00000   -1.20000
AFIX   0
C12   1    0.062131    0.159753    0.222838    11.00000    0.06873    0.06340 =
         0.07365   -0.00888   -0.00752    0.00018
C13   1    0.021988    0.100807    0.196583    11.00000    0.06366    0.06533 =
         0.10153   -0.00590   -0.00369    0.00588
C14   1    0.017556    0.095910    0.155134    11.00000    0.09600    0.09498 =
         0.06851   -0.00670   -0.00114   -0.01418
AFIX  43
H14   2    0.042965    0.134636    0.139027    11.00000   -1.20000
AFIX   0
C15   1   -0.024368    0.033842    0.138124    11.00000    0.09462    0.10521 =
         0.06790   -0.00842   -0.00268   -0.01657
AFIX  43
H15   2   -0.027160    0.029796    0.110123    11.00000   -1.20000
AFIX   0
C16   1   -0.062942   -0.023393    0.161735    11.00000    0.09211    0.09622 =
         0.09008   -0.03449   -0.00310   -0.00636
AFIX  43
H16   2   -0.091408   -0.065255    0.149236    11.00000   -1.20000
AFIX   0
C17   1   -0.060518   -0.020335    0.203251    11.00000    0.07908    0.08214 =
         0.08771   -0.00580    0.00497   -0.00045
AFIX  43
H17   2   -0.086438   -0.059572    0.218843    11.00000   -1.20000
AFIX   0
C18   1   -0.018321    0.042926    0.221111    11.00000    0.06440    0.07789 =
         0.06986   -0.01486   -0.00639    0.01157
C19   1   -0.004355    0.064765    0.263401    11.00000    0.07028    0.09458 =
         0.07835    0.00609    0.00319    0.01684
C20   1   -0.007582    0.067222    0.331485    11.00000    0.08771    0.08441 =
         0.05782    0.00434   -0.00695    0.01695
C21   1   -0.036505    0.030877    0.366565    11.00000    0.12543    0.10441 =
         0.06679   -0.00010    0.00173   -0.00350
AFIX  43
H21   2   -0.069739   -0.014783    0.365447    11.00000   -1.20000
AFIX   0
C22   1   -0.014347    0.064687    0.403122    11.00000    0.15800    0.13602 =
         0.08863    0.02671    0.01740    0.02246
AFIX  43
H22   2   -0.032066    0.041105    0.427098    11.00000   -1.20000
AFIX   0
C23   1    0.034936    0.134693    0.404368    11.00000    0.15440    0.13910 =
         0.06547   -0.02305   -0.02657    0.03967
AFIX  43
H23   2    0.049600    0.156579    0.429235    11.00000   -1.20000
AFIX   0
C24   1    0.061338    0.170682    0.369898    11.00000    0.11651    0.09885 =
         0.08936   -0.00768   -0.00758    0.01270
AFIX  43
H24   2    0.092837    0.217553    0.371042    11.00000   -1.20000
AFIX   0
C25   1    0.040957    0.137015    0.333277    11.00000    0.08674    0.08018 =
         0.07814   -0.00019   -0.00926    0.01379
C26   1    0.044988    0.138759    0.264033    11.00000    0.05702    0.06167 =
         0.08679   -0.01207   -0.00922    0.00548
N1    3    0.139230    0.271627    0.235259    11.00000    0.09454    0.07377 =
         0.07646   -0.01199   -0.01061   -0.00111
N2    3    0.104133    0.219832    0.206458    11.00000    0.08910    0.08935 =
         0.07388   -0.01077   -0.00837   -0.00291
N3    3    0.068308    0.174214    0.297761    11.00000    0.07934    0.07850 =
         0.08684    0.00383    0.00206    0.00760
N4    3   -0.030319    0.030684    0.294513    11.00000    0.08509    0.09776 =
         0.08879    0.01783    0.00821    0.01509
O1    4    0.172721    0.326360    0.305531    11.00000    0.10361    0.09156 =
         0.07900    0.00293   -0.01196   -0.00459
CL3   5   -0.006192   -0.244288    0.262882    10.50000    0.15976    0.23833 =
         0.22484   -0.05588    0.06599   -0.08248
CL1   5   -0.168509   -0.178341    0.268463    10.50000    0.15888    0.17479 =
         0.22752    0.05214    0.02043    0.01691
CL2   5   -0.081129   -0.195703    0.339955    10.50000    0.31580    0.16862 =
         0.12898    0.00242    0.00831   -0.04483
C30   1   -0.078749   -0.165288    0.291502    10.50000    0.11503    0.10436 =
         0.09917    0.00031   -0.00437   -0.00712
AFIX  13
H30   2   -0.059080   -0.109316    0.288900    10.50000   -1.20000
AFIX   0
H1    2    0.147987    0.272687    0.281396    11.00000   -1.20000
HKLF    4


REM  TP_a.res in I4(1)/a
REM R1 =  0.1034 for    1630 Fo > 4sig(Fo)  and  0.1861 for all    3383 data
REM    319 parameters refined using     12 restraints

END

WGHT      0.2000      0.0000

REM Instructions for potential hydrogen bonds
HTAB C30 N4
HTAB O1 N1
HTAB O1 N3

REM Highest difference peak  0.584,  deepest hole -0.400,  1-sigma level  0.061
Q1    1   0.0000 -0.2500  0.3076  10.50000  0.05    0.58
Q2    1  -0.1356 -0.1565  0.3085  11.00000  0.05    0.51
Q3    1   0.1202  0.2425  0.3144  11.00000  0.05    0.43
Q4    1   0.1560  0.2879  0.1945  11.00000  0.05    0.36
Q5    1   0.0046 -0.2040  0.3401  11.00000  0.05    0.34
Q6    1   0.2351  0.3953  0.1708  11.00000  0.05    0.32
Q7    1  -0.0325 -0.1741  0.2987  11.00000  0.05    0.27
Q8    1   0.3533  0.6134  0.2690  11.00000  0.05    0.22
Q9    1   0.2765  0.4687  0.2364  11.00000  0.05    0.21
Q10   1  -0.0445  0.0011  0.2656  11.00000  0.05    0.21
Q11   1   0.3216  0.5703  0.2916  11.00000  0.05    0.20
Q12   1   0.2031  0.3652  0.2067  11.00000  0.05    0.19
Q13   1  -0.0472  0.0469  0.4041  11.00000  0.05    0.18
Q14   1   0.2796  0.5078  0.2185  11.00000  0.05    0.17
Q15   1   0.0180  0.1239  0.1923  11.00000  0.05    0.15
Q16   1   0.0068  0.0629  0.2122  11.00000  0.05    0.15
Q17   1  -0.0827 -0.0522  0.1427  11.00000  0.05    0.14
Q18   1   0.0778  0.1984  0.2976  11.00000  0.05    0.14
Q19   1  -0.0788 -0.2206  0.2501  11.00000  0.05    0.13
Q20   1   0.2590  0.6062  0.2960  11.00000  0.05    0.13
;
_shelx_res_checksum              68887

_shelx_hkl_file                  
;
   1   0  -1  352.86   26.80
   1   0  -1  371.86   26.80
  -1   0   1  344.87   26.80
   2   0  -2  229.28   17.40
  -2   0   2  224.68   17.40
  -2   0   2  240.08   17.60
   3   0  -3   57.89    4.50
  -3   0   3   60.09    4.80
   4   0  -4    6.20    0.70
  -4   0   4    5.30    1.10
   5   0  -5   57.59    4.50
  -5   0   5   59.19    5.00
  -5   0   5   53.89    5.60
   6   0  -6   10.20    1.10
  -6   0   6   10.90    1.70
  -6   0   6   10.00    2.60
   7   0  -7   17.20    1.60
  -7   0   7   14.40    2.20
  -7   0   7   15.10    3.40
   8   0  -8   22.80    2.00
  -8   0   8   24.40    2.80
  -8   0   8   17.80    3.90
   9   0  -9   11.40    1.30
  -9   0   9   11.30    2.20
  -9   0   9    8.60    2.80
  10   0 -10    4.40    0.90
 -10   0  10    4.00    1.60
 -11   0  11    3.70    1.60
 -12   0  12    1.50    1.50
 -13   0  13    2.10    1.60
 -14   0  14    2.70    1.70
 -15   0  15    0.90    1.60
 -16   0  16    0.20    1.50
 -16   1  15    2.00    2.00
 -15   1  14    0.80    1.70
 -14   1  13    4.40    2.10
 -13   1  12    3.90    1.70
 -12   1  11    7.10    2.10
 -11   1  10    6.90    2.00
 -10   1   9    2.70    1.20
  -9   1   8   -0.60    0.80
   9  -1  -8    1.10    0.40
  -8   1   7   22.80    3.00
   8  -1  -7   21.00    1.90
  -7   1   6   16.70    2.20
   7  -1  -6   11.60    1.20
  -6   1   5   34.00    3.20
   6  -1  -5   30.90    2.50
  -5   1   4   20.30    2.10
   5  -1  -4   18.20    1.50
  -4   1   3    4.00    0.80
  -4   1   3    3.60    0.50
   4  -1  -3    4.10    0.40
  -3   1   2  172.68   12.80
  -3   1   2  169.78   12.50
   3  -1  -2  156.48   12.50
  -1   1   0    0.30    0.20
  -1   1   0    0.70    0.10
   1  -1   0    0.10    0.10
   1  -1   0    0.00    0.10
   1   1  -2   17.50    1.40
  -1  -1   2   17.90    1.50
   2   1  -3   27.00    2.30
  -2  -1   3   30.60    2.50
   3   1  -4   18.50    1.60
  -3  -1   4   18.50    1.80
   4   1  -5   62.49    4.90
  -4  -1   5   61.99    5.20
   5   1  -6   38.80    3.00
  -5  -1   6   34.20    3.40
   6   1  -7   53.99    4.40
  -6  -1   7   55.89    4.90
   7   1  -8    0.20    0.90
  -7  -1   8    0.50    1.80
  -7  -1   8    2.00    1.20
   8   1  -9    7.40    1.10
  -8  -1   9    7.30    1.70
  -8  -1   9    5.10    2.40
   9   1 -10   23.80    2.30
  -9  -1  10   37.70    5.50
  -9  -1  10   23.80    3.30
  10   1 -11    7.50    1.30
 -10  -1  11    6.20    2.70
 -10  -1  11    4.90    1.70
 -11  -1  12    0.50    1.30
 -11  -1  12    0.10    2.30
 -12  -1  13    4.20    1.70
 -13  -1  14   11.20    2.70
 -14  -1  15    2.80    1.70
 -15  -1  16    0.50    1.80
 -16  -1  17    4.70    2.40
 -16   2  14    1.00    1.80
 -15   2  13    1.50    1.80
 -14   2  12   13.50    2.90
 -13   2  11   10.50    2.60
 -12   2  10    3.30    1.70
 -11   2   9    5.50    1.80
 -10   2   8    3.10    1.40
  -9   2   7    4.90    1.40
   9  -2  -7    4.80    0.60
  -8   2   6    9.40    1.90
   8  -2  -6   12.90    1.10
  -7   2   5   62.09    5.20
   7  -2  -5   56.19    4.40
  -6   2   4  122.09    9.90
  -6   2   4  144.79   10.60
  -5   2   3  251.07   18.30
   5  -2  -3  224.18   17.70
  -4   2   2 3436.96  252.27
   4  -2  -2 3282.47  251.87
  -3   2   1  494.45   36.90
   3  -2  -1  482.65   36.60
   3  -2  -1  485.25   36.60
  -2   2   0    1.90    0.30
   2  -2   0    1.70    0.40
  -1   2  -1   22.50    1.80
   1  -2   1   22.00    1.90
   0   2  -2  233.68   17.90
   0  -2   2  240.38   18.10
   1   2  -3   22.00    1.90
  -1  -2   3   22.20    2.00
   2   2  -4  513.65   39.70
  -2  -2   4  539.25   39.90
   3   2  -5   18.40    1.70
  -3  -2   5   17.80    1.90
   4   2  -6    1.50    0.50
  -4  -2   6    1.30    0.70
   5   2  -7   32.30    2.80
  -5  -2   7   32.40    3.20
   6   2  -8    3.90    0.80
  -6  -2   8    1.90    1.00
   7   2  -9   31.70    2.80
  -7  -2   9   31.70    3.50
   8   2 -10   35.30    3.20
  -8  -2  10   36.10    3.80
   9   2 -11   42.90    3.70
  -9  -2  11   41.40    4.50
  10   2 -12   -0.40    0.70
 -10  -2  12   -0.30    2.40
 -10  -2  12    0.70    1.00
 -11  -2  13    0.70    1.30
 -11  -2  13   -1.70    1.90
 -12  -2  14    0.90    1.40
 -12  -2  14    2.10    2.70
 -13  -2  15    0.30    1.50
 -13  -2  15   -2.70    2.30
 -14  -2  16    0.40    1.50
 -15  -2  17    0.10    1.70
 -16  -2  18    2.90    2.20
 -16   3  13   -0.70    1.20
 -15   3  12   -2.80    1.40
 -14   3  11    2.10    1.80
 -13   3  10    3.50    1.90
 -12   3   9    0.30    1.20
 -11   3   8    0.40    1.00
 -10   3   7    5.20    1.60
  -9   3   6   16.80    2.60
  -8   3   5    6.20    1.50
  -7   3   4  156.38   12.50
  -6   3   3    6.30    1.30
  -5   3   2   38.20    3.50
   5  -3  -2   39.20    3.00
  -4   3   1 9675.33  715.23
   4  -3  -1 9371.46  714.23
  -3   3   0    0.20    0.30
   3  -3   0    0.10    0.50
  -2   3  -1  555.04   43.10
   2  -3   1  588.84   43.10
  -1   3  -2   42.00    3.10
   1  -3   2   34.30    3.10
   0   3  -3   61.49    4.70
   0  -3   3   57.99    5.10
   1   3  -4   77.59    6.00
  -1  -3   4   75.19    6.30
   2   3  -5  159.88   12.60
  -2  -3   5  169.38   12.90
   3   3  -6    1.90    0.60
  -3  -3   6    1.90    0.80
   4   3  -7   41.30    3.40
  -4  -3   7   38.60    3.70
   5   3  -8    7.50    1.10
  -5  -3   8   11.10    1.80
   6   3  -9    4.80    1.40
  -6  -3   9    4.20    1.30
   7   3 -10    1.80    0.70
  -7  -3  10    1.00    1.00
   8   3 -11    0.20    0.60
  -8  -3  11    0.70    0.90
   9   3 -12    6.30    1.20
  -9  -3  12    5.40    1.70
  10   3 -13    2.60    1.00
 -10  -3  13    1.30    1.30
  11   3 -14    1.30    1.20
 -11  -3  14    1.00    2.10
 -11  -3  14   -0.20    0.90
 -12  -3  15   -1.20    1.30
 -12  -3  15   -0.20    2.80
 -13  -3  16    1.30    1.60
 -13  -3  16   -2.00    2.60
 -14  -3  17    6.60    3.90
 -14  -3  17    8.00    2.70
 -15  -3  18    1.20    2.10
 -15  -3  18   -2.30    2.60
 -16   4  12    1.50    1.90
 -15   4  11    2.10    1.80
 -14   4  10    0.40    1.50
 -13   4   9    3.30    1.70
 -12   4   8    4.10    1.80
 -11   4   7    2.10    1.30
 -10   4   6    1.50    1.20
  -9   4   5    3.70    1.30
  -8   4   4   49.50    4.60
  -7   4   3   24.50    2.80
  -6   4   2   15.60    1.90
   6  -4  -2   10.10    1.00
  -5   4   1    9.20    1.60
   5  -4  -1   15.60    1.20
  -4   4   0   13.60    1.20
   4  -4   0   11.40    1.60
  -3   4  -1  146.89   11.10
   3  -4   1  143.19   11.20
  -2   4  -2  163.48   12.40
   2  -4   2  160.48   12.50
  -1   4  -3  357.96   27.00
   1  -4   3  355.36   27.10
   0   4  -4    4.90    0.80
   0  -4   4    5.20    1.50
   1   4  -5  175.58   13.80
  -1  -4   5  183.68   14.20
   2   4  -6    3.30    0.70
  -2  -4   6    3.50    1.00
   3   4  -7   40.10    3.40
  -3  -4   7   39.50    3.80
   4   4  -8   -0.20    0.50
  -4  -4   8    0.80    0.80
   5   4  -9   44.40    3.80
  -5  -4   9   41.20    4.20
   6   4 -10   36.10    3.30
  -6  -4  10   37.80    3.90
   7   4 -11   14.80    1.80
  -7  -4  11   13.10    2.30
   8   4 -12    3.90    1.00
  -8  -4  12    2.80    1.30
   9   4 -13   13.00    1.80
  -9  -4  13   10.20    2.30
  10   4 -14    7.70    1.50
 -10  -4  14    8.20    2.30
  11   4 -15   13.60    2.20
 -11  -4  15    6.50    2.20
 -12  -4  16    1.60    1.70
 -13  -4  17    1.50    1.70
 -13  -4  17   -2.30    2.50
 -14  -4  18    3.30    2.20
 -14  -4  18    0.70    3.40
 -15  -4  19   -0.70    1.70
 -15  -4  19    1.10    3.60
 -16   5  11   -0.20    1.60
 -15   5  10    4.00    2.00
 -14   5   9    1.50    1.50
 -13   5   8    5.00    1.80
 -12   5   7    2.10    1.40
 -11   5   6    0.70    1.10
 -10   5   5   10.20    2.10
  -9   5   4   12.90    2.20
  -8   5   3  237.58   18.50
   8  -5  -3  231.18   17.70
  -7   5   2   83.69    7.30
   7  -5  -2   88.09    6.70
  -6   5   1    1.00    0.70
   6  -5  -1    0.70    0.40
  -4   5  -1   63.39    5.10
   4  -5   1   65.59    5.40
  -3   5  -2   42.40    3.60
   3  -5   2   46.30    3.80
  -2   5  -3   10.20    1.30
   2  -5   3   11.50    1.40
  -1   5  -4    6.10    1.00
   1  -5   4    8.80    1.30
   0   5  -5   55.99    4.40
   0  -5   5   50.49    5.80
   0  -5   5   52.29    5.00
   1   5  -6    0.60    0.50
  -1  -5   6    0.80    1.10
  -1  -5   6    2.80    1.80
   2   5  -7   57.69    4.70
  -2  -5   7   55.49    5.20
   3   5  -8   10.70    1.50
  -3  -5   8   12.10    2.10
   4   5  -9   94.09    7.90
  -4  -5   9  103.19    8.40
   5   5 -10    0.60    0.70
  -5  -5  10    0.20    0.90
   6   5 -11    9.90    1.60
  -6  -5  11   12.30    2.30
   7   5 -12   15.40    2.10
  -7  -5  12   15.80    2.80
   8   5 -13    2.20    1.20
  -8  -5  13    1.50    1.20
   9   5 -14    3.60    1.20
  -9  -5  14    2.70    1.60
  10   5 -15    4.70    1.40
 -10  -5  15    6.70    2.20
  11   5 -16    2.40    1.30
 -11  -5  16    4.90    2.10
 -12  -5  17   10.00    2.80
 -13  -5  18    4.00    2.30
 -14  -5  19    4.80    2.50
 -14  -5  19    3.10    3.70
 -16   6  10   -0.90    1.50
 -15   6   9   -0.90    1.50
 -14   6   8   -0.10    1.30
 -13   6   7    0.70    1.30
 -12   6   6   12.80    2.70
 -11   6   5   15.00    2.60
 -10   6   4    6.70    1.80
  -9   6   3    2.90    1.30
  -8   6   2  514.95   42.00
   8  -6  -2  575.54   41.30
  -7   6   1  117.09    9.00
   7  -6  -1  101.49    8.30
  -6   6   0  211.78   15.60
   6  -6   0  187.18   15.10
  -5   6  -1    3.90    0.80
   5  -6   1    4.70    1.10
  -4   6  -2    5.80    0.90
   4  -6   2    4.20    1.00
  -3   6  -3    0.70    0.50
   3  -6   3    0.40    0.60
  -2   6  -4   55.69    4.60
   2  -6   4   55.09    4.70
   2  -6   4   56.69    6.10
  -1   6  -5    2.20    0.80
   1  -6   5    3.80    1.00
   1  -6   5    9.20    2.80
   0   6  -6    8.60    1.30
   0  -6   6   11.40    2.10
   0  -6   6   10.60    3.10
   1   6  -7    1.70    0.70
  -1  -6   7    5.70    2.50
  -1  -6   7   -0.30    1.20
   2   6  -8   14.30    1.80
  -2  -6   8   15.50    2.70
   3   6  -9    5.20    1.50
  -3  -6   9    8.60    2.10
   4   6 -10    0.80    0.70
  -4  -6  10   -0.80    0.90
   5   6 -11   18.20    2.10
  -5  -6  11   13.70    2.50
   6   6 -12    5.40    1.30
  -6  -6  12    8.30    2.00
   7   6 -13   21.60    2.80
  -7  -6  13   28.20    3.90
   8   6 -14    1.10    0.90
  -8  -6  14    0.80    1.20
   9   6 -15   -0.70    0.90
  -9  -6  15   -0.10    1.30
  10   6 -16   -2.40    1.50
 -10  -6  16   -0.10    1.20
  11   6 -17   -0.20    1.10
 -11  -6  17    1.40    1.60
 -12  -6  18   -0.40    1.40
 -13  -6  19    0.70    1.80
 -14  -6  20   -1.40    1.70
 -14  -6  20   -3.50    3.00
 -16   7   9   -1.80    1.40
 -15   7   8   -0.40    1.50
 -14   7   7    1.90    1.70
 -13   7   6    0.10    1.20
 -12   7   5   46.80    5.10
 -11   7   4    4.80    1.70
 -10   7   3    1.60    1.20
  -9   7   2   -0.90    0.90
  -8   7   1    2.60    1.30
   8  -7  -1   14.10    1.20
  -7   7   0   -0.90    0.70
  -6   7  -1   31.40    2.70
   6  -7   1   26.80    3.00
  -5   7  -2   37.90    3.20
   5  -7   2   36.20    3.50
  -4   7  -3   32.70    3.00
   4  -7   3   34.10    3.20
   4  -7   3   20.00    5.20
  -3   7  -4   25.60    2.40
   3  -7   4   17.20    4.10
   3  -7   4   28.20    2.60
  -2   7  -5    1.20    0.70
   2  -7   5    0.60    0.70
   2  -7   5    0.20    1.80
  -1   7  -6  173.98   12.80
   1  -7   6  155.28   14.70
   1  -7   6  158.88   13.00
   0   7  -7   16.50    2.10
   0  -7   7   21.00    3.00
   0  -7   7   19.40    4.20
   1   7  -8    8.40    1.70
  -1  -7   8    7.10    2.30
   2   7  -9   97.39    7.60
  -2  -7   9   86.89    8.40
   3   7 -10    5.90    1.30
  -3  -7  10    6.20    1.90
   4   7 -11   18.00    2.20
  -4  -7  11   14.30    2.80
   5   7 -12   28.00    3.00
  -5  -7  12   29.30    4.10
   6   7 -13    2.90    1.10
  -6  -7  13    3.70    1.60
   7   7 -14    7.30    1.50
  -7  -7  14    4.30    1.80
   8   7 -15    1.70    1.20
  -8  -7  15    1.20    1.40
   9   7 -16    2.70    1.80
  -9  -7  16    1.00    1.70
  10   7 -17    0.10    1.20
 -10  -7  17    4.70    2.30
  11   7 -18    0.60    1.30
 -11  -7  18   -0.10    1.50
 -12  -7  19   -2.50    1.50
 -13  -7  20    0.00    1.60
 -16   8   8    4.20    2.30
 -15   8   7    2.00    1.90
 -14   8   6   -0.60    1.50
 -13   8   5    1.00    1.60
 -12   8   4   63.19    6.30
 -11   8   3    1.00    1.40
 -10   8   2    1.80    1.40
  -9   8   1    7.50    1.80
  -8   8   0   10.70    2.10
   8  -8   0   18.20    1.80
  -7   8  -1   13.10    2.00
   7  -8   1    6.20    2.70
   7  -8   1   13.90    1.50
  -6   8  -2   38.90    3.30
   6  -8   2   35.70    3.60
  -5   8  -3    4.70    1.00
   5  -8   3    5.50    1.20
   5  -8   3    1.90    2.00
  -4   8  -4   41.30    3.80
   4  -8   4   44.70    3.90
  -3   8  -5    0.90    0.70
   3  -8   5    0.00    1.80
   3  -8   5    1.20    0.80
  -2   8  -6    1.40    0.80
   2  -8   6    2.20    0.90
   2  -8   6    1.80    1.90
  -1   8  -7   15.20    2.00
   1  -8   7   14.00    2.20
   1  -8   7   19.70    4.40
   0   8  -8   21.70    2.50
   0  -8   8   24.20    3.50
   1   8  -9    6.90    1.40
  -1  -8   9    6.10    2.30
   2   8 -10    0.50    0.80
  -2  -8  10    1.40    1.80
   3   8 -11    1.80    0.90
  -3  -8  11   -0.10    1.30
   4   8 -12   15.30    2.20
  -4  -8  12   21.80    3.50
   5   8 -13    8.40    1.80
  -5  -8  13    7.80    2.30
   6   8 -14    2.00    1.20
  -6  -8  14   -0.60    1.30
   7   8 -15   13.90    2.20
  -7  -8  15   13.30    2.90
   8   8 -16    1.30    1.40
  -8  -8  16   -2.20    1.30
   9   8 -17    4.40    1.60
  -9  -8  17    0.40    1.60
  10   8 -18    1.80    1.40
 -10  -8  18   -0.50    1.50
  11   8 -19    0.80    1.50
 -11  -8  19   -0.20    1.70
 -12  -8  20    0.50    2.00
 -13  -8  21    3.00    2.40
 -15   9   6    0.70    2.40
 -14   9   5    1.40    1.60
 -13   9   4    0.80    1.50
 -12   9   3   10.00    2.30
 -11   9   2   -1.60    1.20
 -10   9   1   28.30    3.70
  -9   9   0   -1.30    0.80
  -8   9  -1    2.90    1.20
   7  -9   2    7.40    1.90
  -6   9  -3    5.90    1.10
   6  -9   3    2.30    2.30
   6  -9   3    4.90    1.30
  -5   9  -4    2.70    0.90
   5  -9   4   -1.90    1.70
   5  -9   4    2.60    1.00
  -4   9  -5   14.00    2.00
   4  -9   5   18.30    2.00
   4  -9   5    9.50    3.30
  -3   9  -6   34.60    3.20
   3  -9   6   27.60    5.70
   3  -9   6   31.30    3.10
  -2   9  -7    8.00    1.40
   2  -9   7    4.30    2.90
   2  -9   7    9.80    1.60
  -1   9  -8    5.60    1.20
   1  -9   8    6.20    1.50
   0   9  -9   13.50    2.00
   0  -9   9   12.50    2.60
   1   9 -10   41.50    3.90
  -1  -9  10   40.10    5.40
   2   9 -11    0.30    0.80
  -2  -9  11   -0.10    1.90
   3   9 -12    1.50    1.00
  -3  -9  12   -2.00    1.60
   4   9 -13    5.80    1.50
  -4  -9  13    3.00    2.00
   5   9 -14   -0.10    1.10
  -5  -9  14   -0.30    1.40
   6   9 -15    1.50    1.30
  -6  -9  15    0.60    1.70
   7   9 -16    1.60    1.80
  -7  -9  16    1.20    1.80
   8   9 -17    0.10    1.30
  -8  -9  17    2.10    2.10
   9   9 -18   -0.40    1.30
  -9  -9  18   -0.80    1.80
  10   9 -19    0.20    1.50
 -10  -9  19    2.00    2.10
  11   9 -20   -0.80    1.40
 -11  -9  20    1.10    2.10
  12   9 -21   -1.60    2.00
 -12  -9  21   -0.90    2.20
 -10  10   0   21.20    3.30
  -9  10  -1    9.50    2.10
  -8  10  -2    3.20    1.30
  -7  10  -3   -0.20    0.70
   7 -10   3    0.60    0.90
  -6  10  -4    5.10    1.10
   6 -10   4    2.40    1.10
  -5  10  -5    5.40    1.40
   5 -10   5    6.90    1.60
  -4  10  -6    6.30    1.40
   4 -10   6    6.70    1.40
  -3  10  -7    0.20    0.80
   3 -10   7    1.40    0.90
  -2  10  -8    6.80    1.50
   2 -10   8    8.50    1.70
  -1  10  -9   30.70    3.10
   1 -10   9   28.80    3.30
   0  10 -10    2.00    1.00
   0 -10  10    1.90    1.50
   1  10 -11   17.10    2.40
  -1 -10  11   13.30    3.30
   2  10 -12   15.00    2.20
  -2 -10  12    5.80    2.90
   3  10 -13   18.00    2.50
  -3 -10  13   13.40    3.60
   4  10 -14    3.10    1.40
  -4 -10  14    2.70    2.20
   5  10 -15   11.50    2.20
  -5 -10  15   13.70    3.40
   6  10 -16    5.50    2.10
  -6 -10  16    8.20    3.00
   7  10 -17    0.60    1.60
  -7 -10  17    0.20    1.80
   8  10 -18    1.00    1.40
  -8 -10  18   -1.70    1.70
   9  10 -19    0.60    1.50
  -9 -10  19   -0.80    2.20
  10  10 -20   -0.10    1.60
 -10 -10  20   -2.50    1.90
  11  10 -21   -0.80    2.00
 -11 -10  21   -2.90    2.10
  -7  11  -4    1.30    1.00
  -6  11  -5    0.90    0.90
  -5  11  -6   11.90    1.90
  -4  11  -7    5.00    1.40
  -3  11  -8    2.30    1.20
   3 -11   8    2.30    1.20
  -2  11  -9    1.90    1.10
   2 -11   9    0.60    0.90
  -1  11 -10   13.90    2.20
   1 -11  10   13.60    2.30
   0  11 -11    4.70    1.40
   0 -11  11    4.30    1.90
   1  11 -12    1.80    1.20
  -1 -11  12    1.60    2.20
   2  11 -13   11.20    2.10
  -2 -11  13    9.70    3.30
   3  11 -14    5.30    1.60
  -3 -11  14   -1.90    2.50
   4  11 -15    3.50    1.80
  -4 -11  15   -3.10    2.10
   5  11 -16    4.00    1.80
  -5 -11  16   -2.40    2.10
   6  11 -17    8.10    2.10
  -6 -11  17    5.60    2.80
   7  11 -18    2.20    1.60
  -7 -11  18   -2.80    1.80
   8  11 -19    0.50    1.50
  -8 -11  19   -0.10    2.20
   9  11 -20    2.10    1.80
  -9 -11  20    2.20    2.40
  10  11 -21    1.20    2.30
 -10 -11  21   -0.50    2.40
  -7  12  -5    0.40    1.50
  -6  12  -6   16.40    2.40
  -5  12  -7   -1.80    0.90
  -4  12  -8    2.00    1.20
  -3  12  -9    4.70    1.50
  -2  12 -10    2.40    1.20
  -1  12 -11    0.80    1.20
   0  12 -12    2.80    1.40
   1  12 -13    4.70    1.60
   2  12 -14   10.50    2.50
   3  12 -15   -2.40    1.30
   4  12 -16   -1.60    1.30
  -4 -12  16   -1.90    2.80
   5  12 -17   -1.10    1.30
  -5 -12  17   -3.30    2.50
   6  12 -18   -1.50    1.80
  -6 -12  18   -1.40    2.50
   7  12 -19   -2.70    1.60
  -7 -12  19   -2.10    2.30
   8  12 -20   -1.10    1.60
  -8 -12  20   -3.30    2.10
   9  12 -21   -2.20    1.90
  -9 -12  21   -3.00    2.50
  -6  13  -7   10.70    2.00
  -5  13  -8    6.90    1.80
  -4  13  -9   -1.00    1.20
  -3  13 -10    0.60    1.50
  -2  13 -11    3.30    1.80
  -1  13 -12   10.10    2.20
   0  13 -13    1.30    1.60
   1  13 -14   30.50    3.90
   2  13 -15    4.30    1.70
   3  13 -16    3.40    1.80
   4  13 -17   -3.10    1.50
   5  13 -18    0.50    1.70
   6  13 -19   -0.20    1.70
   7  13 -20   -0.40    1.90
  -6  14  -8    1.80    1.30
  -5  14  -9   -0.70    1.20
  -4  14 -10    2.00    1.50
  -3  14 -11   -2.90    1.20
  -2  14 -12    0.80    1.40
  -1  14 -13    2.10    1.60
   0  14 -14    3.70    1.80
   1  14 -15    5.40    2.00
   2  14 -16    7.70    2.60
   3  14 -17    0.00    1.70
   4  14 -18    0.40    1.80
   5  14 -19   -0.30    1.80
   6  14 -20   -1.30    2.10
  -6  15  -9   -0.70    1.40
  -5  15 -10    0.90    1.50
  -4  15 -11   -1.10    1.50
  -3  15 -12    0.50    1.60
  -2  15 -13    1.00    1.70
  -1  15 -14    4.20    2.10
   0  15 -15    0.70    1.80
   1  15 -16    1.60    2.00
   2  15 -17    5.40    2.30
   3  15 -18    2.30    2.00
   4  15 -19   -2.10    2.10
  -5  16 -11    0.70    1.70
  -4  16 -12    2.90    1.90
  -3  16 -13    4.50    2.00
  -2  16 -14    3.10    2.10
  -1  16 -15   -1.00    1.80
   0  16 -16    2.30    2.00
   1  16 -17    5.60    2.80
   2  16 -18    0.40    2.10
  -1  17 -14    0.70    2.10
  -2  17 -13    8.40    2.70
  -3  17 -12    3.70    2.30
  -4  17 -11    0.60    1.90
   3  16 -17   -0.70    1.90
   2  16 -16    0.60    2.20
   1  16 -15    7.40    2.50
   0  16 -14    0.20    1.90
  -1  16 -13   -0.10    1.70
  -2  16 -12    3.00    2.00
  -3  16 -11    1.40    1.80
  -4  16 -10    0.80    1.50
  -5  16  -9   -1.40    1.40
   5  15 -18   -1.60    2.10
   4  15 -17    2.90    2.10
   3  15 -16   -1.30    1.60
   2  15 -15    0.70    2.00
   1  15 -14   -0.40    1.70
   0  15 -13   -0.10    1.90
  -1  15 -12    0.20    1.80
  -2  15 -11   -1.50    1.70
  -3  15 -10    4.20    2.00
  -4  15  -9    0.60    1.70
  -5  15  -8    0.20    1.50
   7  14 -19   -0.20    2.30
   6  14 -18   -3.30    1.80
   5  14 -17    1.60    1.90
   4  14 -16    0.30    1.90
   3  14 -15   -1.00    1.80
   2  14 -14   14.60    2.70
   1  14 -13   10.30    2.40
   0  14 -12   -2.20    1.20
  -1  14 -11    0.70    1.50
  -2  14 -10   -1.50    1.10
  -3  14  -9   -1.20    1.20
  -4  14  -8    2.30    1.50
  -5  14  -7   -0.40    1.10
  -6  14  -6    4.10    1.50
  -8 -13  19   -2.90    3.00
   8  13 -19    1.10    2.40
  -7 -13  18   -4.60    3.00
   7  13 -18    1.00    1.90
  -6 -13  17   -5.30    3.40
   6  13 -17    0.70    1.70
   5  13 -16    7.60    2.40
   4  13 -15    0.50    1.60
   3  13 -14    2.60    1.70
   2  13 -13    0.00    1.60
   1  13 -12    5.20    2.00
   0  13 -11    0.00    1.80
  -1  13 -10   -0.70    1.60
  -2  13  -9   -0.10    1.50
  -3  13  -8    1.60    1.70
  -4  13  -7    4.40    1.90
  -5  13  -6   -0.70    1.30
  -6  13  -5    5.30    1.50
 -10 -12  20   -2.20    2.70
  -9 -12  19   -3.00    2.30
   9  12 -19    0.90    1.80
  -8 -12  18   -0.10    2.50
   8  12 -18   -0.80    1.60
  -7 -12  17   -1.50    2.30
   7  12 -17    2.20    2.10
  -6 -12  16   -2.90    2.40
   6  12 -16   -0.70    1.40
  -5 -12  15   -3.50    2.40
   5  12 -15    3.80    1.90
  -4 -12  14   -2.50    3.00
   4  12 -14   -0.90    1.40
  -3 -12  13    2.00    3.10
   3  12 -13    6.30    2.20
  -2 -12  12   13.60    3.90
   2  12 -12   13.70    2.50
  -1 -12  11   10.70    3.00
   1  12 -11   12.80    2.30
   0 -12  10    1.20    1.50
   0  12 -10    0.50    1.10
   1 -12   9    9.30    2.10
  -1  12  -9   12.30    2.10
   2 -12   8    1.00    1.30
  -2  12  -8    0.70    1.00
  -3  12  -7    1.00    1.10
  -4  12  -6    9.30    1.80
  -5  12  -5    9.60    1.80
  -6  12  -4   -0.20    0.80
 -11 -11  20   -0.80    2.40
 -10 -11  19   -1.30    2.30
  10  11 -19    0.20    1.70
  -9 -11  18    0.20    2.30
   9  11 -18    1.00    1.80
  -8 -11  17    0.90    2.40
   8  11 -17    2.40    2.00
  -7 -11  16    2.80    2.60
   7  11 -16    7.70    2.20
  -6 -11  15   14.00    3.90
   6  11 -15   16.50    2.80
  -5 -11  14   15.40    4.20
   5  11 -14   17.10    3.20
  -4 -11  13   -1.70    2.50
   4  11 -13    1.10    1.30
  -3 -11  12    1.30    2.90
   3  11 -12    2.80    1.30
  -2 -11  11   10.70    3.40
   2  11 -11   14.40    2.30
  -1 -11  10    6.90    2.50
   1  11 -10    7.80    1.70
   0 -11   9    0.50    1.40
   0  11  -9    1.30    1.10
   1 -11   8    1.30    1.40
  -1  11  -8    1.50    1.10
   2 -11   7   16.60    2.60
  -2  11  -7   20.10    2.60
   3 -11   6   11.30    2.00
  -3  11  -6   14.60    2.10
   4 -11   5   -0.20    0.70
  -4  11  -5    0.80    0.90
   5 -11   4   -0.50    0.80
  -5  11  -4   -0.10    0.80
   6 -11   3    1.40    1.10
  -6  11  -3    0.10    0.80
   7 -11   2   -1.50    0.90
  -9  11   0   -1.80    1.40
 -12 -10  20    4.50    3.20
 -11 -10  19   -1.00    2.10
  11  10 -19   -0.70    1.60
 -10 -10  18    0.90    2.30
  10  10 -18   -1.60    1.40
  -9 -10  17    0.30    1.90
   9  10 -17   -1.30    1.50
  -8 -10  16    3.50    2.30
   8  10 -16    7.40    2.00
  -7 -10  15    2.90    2.50
   7  10 -15    2.50    1.60
  -6 -10  14   16.20    3.80
   6  10 -14   16.20    2.70
  -5 -10  13   10.60    3.30
   5  10 -13   15.50    2.40
  -4 -10  12   32.90    5.30
   4  10 -12   36.00    3.70
  -3 -10  11   -2.60    2.00
   3  10 -11    2.00    1.10
  -2 -10  10    1.30    2.30
   2  10 -10    0.60    1.10
  -1 -10   9    3.20    2.10
   1  10  -9    2.40    1.10
   0 -10   8    3.30    1.70
   0  10  -8    1.40    0.90
   1 -10   7   33.20    3.60
  -1  10  -7   32.00    3.30
   2 -10   6  141.59   11.40
  -2  10  -6  137.39   11.20
   3 -10   5   55.79    5.10
  -3  10  -5   56.49    5.00
   4 -10   4    0.40    0.80
  -4  10  -4    0.60    0.80
   5 -10   3   33.30    3.50
  -5  10  -3   34.60    3.30
   6 -10   2   -0.60    0.90
  -6  10  -2   -0.40    0.70
   7 -10   1   -0.80    0.80
  -7  10  -1    0.90    0.70
  -9  10   1    7.50    1.90
 -10  10   2   -0.30    1.60
 -11  10   3    5.30    2.00
 -12  10   4    1.80    1.50
 -13  10   5    0.00    1.40
 -12  -9  19    0.00    2.10
  12   9 -19    3.20    1.80
 -11  -9  18    1.60    2.30
  11   9 -18   -0.70    1.40
 -10  -9  17   -0.10    1.80
  10   9 -17    1.80    1.50
  -9  -9  16   -2.30    1.30
   9   9 -16   -1.30    1.20
  -8  -9  15    0.80    1.90
   8   9 -15   -2.60    1.40
  -7  -9  14   23.10    4.30
   7   9 -14   22.20    3.00
  -6  -9  13   -2.90    1.20
   6   9 -13    0.40    1.00
  -5  -9  12    1.10    1.90
   5   9 -12    4.40    1.30
  -4  -9  11   -0.30    1.70
   4   9 -11    0.30    0.90
  -3  -9  10   -1.80    1.60
   3   9 -10    1.10    0.90
  -2  -9   9   -1.70    1.90
   2   9  -9    1.90    0.90
  -1  -9   8    0.30    1.70
   1   9  -8    0.50    0.70
   0  -9   7   15.90    2.70
   0   9  -7   14.20    2.00
   1  -9   6   11.90    2.10
  -1   9  -6   12.30    1.80
   2  -9   5   20.70    2.50
  -2   9  -5   23.10    2.60
   3  -9   4    6.70    1.40
  -3   9  -4    7.90    1.40
   4  -9   3   20.80    2.70
  -4   9  -3   24.20    2.40
   5  -9   2   20.10    2.60
  -5   9  -2   22.30    2.30
   6  -9   1    0.40    1.00
  -6   9  -1    2.20    0.80
   7  -9   0    0.60    1.30
  -7   9   0    0.10    0.70
  -8   9   1    1.20    1.20
  -9   9   2    4.00    1.60
 -10   9   3   16.30    2.90
 -11   9   4    0.00    1.50
 -12   9   5    0.60    1.30
 -13   9   6    4.90    1.90
 -14   9   7   -2.00    1.30
 -15   9   8   -0.90    1.40
 -13  -8  19   -1.00    1.90
 -12  -8  18   -2.00    1.40
  12   8 -18   -0.30    1.30
 -11  -8  17    0.70    1.80
  11   8 -17   -0.40    1.50
 -10  -8  16   -0.70    1.50
  10   8 -16    1.10    1.30
  -9  -8  15    6.10    2.50
   9   8 -15    5.70    1.90
  -8  -8  14    4.80    2.10
   8   8 -14    2.70    1.30
  -7  -8  13    3.60    2.00
   7   8 -13    2.90    1.30
  -6  -8  12    7.60    2.30
   6   8 -12   12.10    1.90
  -5  -8  11    1.40    1.50
   5   8 -11    1.30    0.90
  -4  -8  10   12.30    2.80
   4   8 -10    9.70    1.60
  -3  -8   9   13.00    3.10
   3   8  -9   17.70    2.20
  -2  -8   8   21.70    4.00
   2   8  -8   29.90    2.80
  -1  -8   7   22.10    3.70
   1   8  -7   21.10    2.50
   0  -8   6    5.20    1.90
   0   8  -6    2.20    0.90
   1  -8   5    6.10    1.50
  -1   8  -5    2.80    0.90
   2  -8   4   27.40    2.90
  -2   8  -4   28.10    2.70
   3  -8   3    1.10    0.90
  -3   8  -3    1.00    0.70
   4  -8   2   12.50    1.90
  -4   8  -2   14.90    1.70
   5  -8   1    1.40    0.90
  -5   8  -1    2.60    0.80
   6  -8   0    0.00    0.90
  -6   8   0    0.30    0.60
  -8   8   2   19.10    2.70
  -9   8   3    7.60    1.80
 -10   8   4   22.00    3.30
 -11   8   5    1.90    1.50
 -12   8   6    2.00    1.50
 -13   8   7   -0.40    1.40
 -14   8   8    0.50    1.60
 -15   8   9    0.60    1.70
 -14  -7  19   -1.10    2.00
 -13  -7  18   -1.90    1.50
 -12  -7  17    2.30    2.10
  12   7 -17    2.50    1.80
 -11  -7  16   -0.20    1.40
  11   7 -16   -0.80    1.20
 -10  -7  15   -0.40    1.60
  10   7 -15   -0.80    1.20
  -9  -7  14   29.70    4.60
   9   7 -14   36.80    3.60
  -8  -7  13   14.40    3.10
   8   7 -13   16.00    2.30
  -7  -7  12    1.70    1.50
   7   7 -12    8.80    1.60
  -6  -7  11    0.10    1.30
   6   7 -11    1.80    0.90
  -5  -7  10    7.00    2.00
   5   7 -10    7.30    1.40
  -4  -7   9    1.30    1.30
   4   7  -9   -0.30    0.60
  -3  -7   8   21.30    3.40
   3   7  -8   13.30    1.90
  -2  -7   7  245.98   21.00
   2   7  -7  271.17   20.10
  -1  -7   6   12.10    2.70
   1   7  -6   13.00    1.70
   0  -7   5   11.00    2.20
   0   7  -5   10.20    1.50
   1  -7   4    6.40    1.40
  -1   7  -4    6.10    1.10
   2  -7   3   82.89    7.10
  -2   7  -3   88.59    6.90
   3  -7   2   34.20    3.20
  -3   7  -2   33.60    3.00
   4  -7   1   41.10    4.10
  -4   7  -1   40.80    3.60
   5  -7   0    0.50    0.80
  -5   7   0    0.20    0.50
   6  -7  -1   26.00    3.00
  -6   7   1   28.70    2.40
   7  -7  -2   11.50    1.30
  -7   7   2    8.90    1.80
  -8   7   3    0.90    0.90
  -9   7   4    1.60    1.30
 -10   7   5    0.60    1.20
 -11   7   6   15.70    2.70
 -12   7   7    8.60    2.30
 -13   7   8    0.30    1.50
 -14   7   9    0.30    1.50
 -15   7  10    0.50    1.70
 -16   7  11    1.30    2.00
 -14  -6  18   -2.20    1.50
 -14  -6  18   -0.20    3.40
 -13  -6  17    0.50    1.80
 -12  -6  16   -0.30    1.30
  12   6 -16    0.20    1.30
 -11  -6  15    1.30    1.60
  11   6 -15    3.00    1.50
 -10  -6  14   10.80    2.80
  10   6 -14    7.40    1.60
  -9  -6  13   11.70    2.60
   9   6 -13   11.50    1.80
  -8  -6  12    0.90    1.20
   8   6 -12    1.60    1.00
  -7  -6  11    5.40    1.90
   7   6 -11    7.60    1.40
  -6  -6  10    2.80    1.40
   6   6 -10    2.60    0.90
  -5  -6   9    3.40    1.40
   5   6  -9    3.90    1.00
  -4  -6   8   22.90    3.70
   4   6  -8   28.00    2.80
  -3  -6   7   72.29    6.90
   3   6  -7   74.79    6.10
  -2  -6   6   29.20    3.80
   2   6  -6   26.30    2.60
  -1  -6   5   31.70    3.90
   1   6  -5   27.90    2.70
   0  -6   4   65.49    5.80
   0   6  -4   62.29    5.20
   1  -6   3   96.99    7.90
  -1   6  -3   98.39    7.70
   2  -6   2   11.80    1.50
  -2   6  -2    6.90    1.10
   3  -6   1    0.00    0.60
  -3   6  -1    1.20    0.50
   4  -6   0  263.97   20.70
  -4   6   0  272.07   20.40
   5  -6  -1    4.10    1.20
  -5   6   1    2.90    0.60
   7  -6  -3    0.00    0.30
  -7   6   3    0.60    0.90
  -8   6   4   18.10    2.60
  -9   6   5    0.40    1.00
 -10   6   6    2.00    1.30
 -11   6   7    4.10    1.60
 -12   6   8    4.10    1.70
 -13   6   9   -0.60    1.20
 -14   6  10    0.50    1.40
 -15   6  11   -2.10    1.40
 -16   6  12    2.20    2.10
 -15  -5  18    1.20    1.90
 -15  -5  18    1.40    3.50
 -14  -5  17    4.30    3.60
 -14  -5  17   -0.50    1.40
 -13  -5  16    0.60    2.60
 -13  -5  16   -0.50    1.40
 -12  -5  15    0.10    1.30
 -11  -5  14    3.00    1.80
  11   5 -14    2.80    1.80
 -10  -5  13    9.90    2.50
  10   5 -13   11.30    1.90
  -9  -5  12    2.00    1.40
   9   5 -12    2.10    1.00
  -8  -5  11    4.80    1.70
   8   5 -11    4.50    1.20
  -7  -5  10   13.10    2.40
   7   5 -10   14.00    1.90
  -6  -5   9    3.20    1.40
   6   5  -9    3.70    1.00
  -5  -5   8    3.40    1.50
   5   5  -8    5.20    1.50
  -4  -5   7   -0.10    0.90
   4   5  -7    2.20    0.80
  -3  -5   6   -0.40    0.90
   3   5  -6    0.40    0.50
  -2  -5   5   11.80    2.20
   2   5  -5    9.80    1.40
  -1  -5   4   21.10    3.00
   1   5  -4   17.00    1.80
   0  -5   3    9.70    1.80
   0   5  -3    9.10    1.20
   1  -5   2   12.30    1.60
  -1   5  -2    9.10    1.20
   2  -5   1   84.09    6.50
  -2   5  -1   76.39    6.30
   3  -5   0    0.30    0.60
  -3   5   0   -0.10    0.30
   4  -5  -1   61.79    5.30
  -4   5   1   62.99    4.90
   5  -5  -2    2.00    0.90
  -5   5   2    1.50    0.40
   6  -5  -3   34.60    3.00
  -6   5   3   46.70    3.80
  -7   5   4    4.60    1.30
  -8   5   5   15.10    2.40
  -9   5   6    1.90    1.10
 -10   5   7    3.40    1.40
 -11   5   8    2.80    1.30
 -12   5   9    1.20    1.30
 -13   5  10    1.90    1.60
 -14   5  11    2.10    1.90
 -15   5  12    0.40    1.70
 -16   5  13   -0.20    1.70
 -15  -4  17    0.50    1.90
 -15  -4  17    3.30    3.80
 -14  -4  16   -4.00    2.70
 -14  -4  16   -0.10    1.80
 -13  -4  15    9.40    2.90
 -13  -4  15    7.00    4.00
 -12  -4  14    2.20    1.90
 -12  -4  14    0.40    3.10
 -11  -4  13    6.50    2.20
  11   4 -13    6.60    1.50
 -10  -4  12   23.10    3.70
  10   4 -12   27.70    2.70
  -9  -4  11   51.69    5.50
   9   4 -11   57.39    4.90
  -8  -4  10    1.80    1.20
   8   4 -10    2.50    0.90
  -7  -4   9   16.40    2.80
   7   4  -9   22.80    2.20
  -6  -4   8  239.88   18.80
   6   4  -8  231.18   18.10
  -5  -4   7   72.39    6.20
   5   4  -7   68.49    5.70
  -4  -4   6    5.80    1.30
   4   4  -6    5.30    0.90
  -3  -4   5  535.75   42.10
   3   4  -5  563.64   41.60
  -2  -4   4   32.50    3.20
   2   4  -4   25.60    2.50
  -1  -4   3    4.40    1.60
   1   4  -3    3.70    0.70
   0  -4   2   94.09    7.80
   0   4  -2   95.59    7.40
   1  -4   1   43.20    3.90
  -1   4  -1   49.40    3.80
   2  -4   0  284.07   22.60
  -2   4   0  309.37   22.50
   3  -4  -1  140.49   11.30
  -3   4   1  147.89   11.00
   4  -4  -2  183.28   15.20
  -4   4   2  205.78   14.80
   5  -4  -3    8.30    0.80
  -5   4   3    8.60    1.40
  -6   4   4    1.00    0.80
  -7   4   5    3.20    1.20
  -8   4   6    1.30    0.90
  -9   4   7    1.40    1.00
 -10   4   8    9.20    2.10
 -11   4   9    0.00    1.10
 -12   4  10   -0.50    1.20
 -13   4  11   -0.20    1.20
 -14   4  12    2.50    1.80
 -15   4  13    3.20    1.80
 -16   4  14    3.30    2.10
 -16  -3  17    3.50    2.50
 -15  -3  16   -0.50    2.10
 -14  -3  15    2.30    1.90
 -14  -3  15    2.80    3.10
 -13  -3  14    4.40    3.90
 -13  -3  14   -0.10    1.30
 -12  -3  13    1.40    3.10
 -12  -3  13    4.10    1.70
 -11  -3  12   -0.40    2.40
 -11  -3  12   -0.60    1.10
  11   3 -12   -0.10    0.80
 -10  -3  11   11.30    2.50
  10   3 -11    8.20    1.40
  -9  -3  10   60.19    5.80
   9   3 -10   57.59    5.00
  -8  -3   9    0.00    1.00
   8   3  -9    0.90    0.70
  -7  -3   8    2.40    1.20
   7   3  -8    2.40    0.80
  -6  -3   7   40.00    4.00
   6   3  -7   39.60    3.40
  -5  -3   6    0.80    0.80
   5   3  -6    1.20    0.60
  -4  -3   5   44.80    4.20
   4   3  -5   48.00    3.90
  -3  -3   4  120.39   10.00
   3   3  -4  128.59    9.70
  -2  -3   3   45.30    4.20
   2   3  -3   48.80    3.80
  -1  -3   2  179.18   13.70
   1   3  -2  167.38   13.20
   0  -3   1  799.02   60.89
   0   3  -1  812.72   60.59
   1  -3   0   -0.20    0.40
  -1   3   0    0.00    0.30
   2  -3  -1  593.54   43.10
  -2   3   1  548.95   42.90
   3  -3  -2  210.38   16.20
  -3   3   2  209.88   15.90
  -4   3   3  460.25   35.00
  -5   3   4    1.90    0.80
  -6   3   5  140.99   11.40
  -7   3   6    2.30    1.20
  -8   3   7   17.80    2.50
  -9   3   8    0.30    1.00
 -10   3   9    3.40    1.40
 -11   3  10    0.70    1.30
 -12   3  11    2.10    1.60
 -13   3  12    0.50    1.40
 -14   3  13    0.70    1.50
 -15   3  14    0.40    1.50
 -16   3  15    0.40    1.70
 -16  -2  16   -0.40    1.60
 -15  -2  15    2.00    2.10
 -14  -2  14    1.20    1.70
 -13  -2  13    1.90    1.80
 -13  -2  13    2.90    2.90
 -12  -2  12    4.50    3.20
 -12  -2  12   -0.60    1.30
 -11  -2  11   14.90    4.20
 -11  -2  11    7.20    2.10
  11   2 -11    7.20    1.30
 -10  -2  10   57.99    8.10
 -10  -2  10   49.60    5.30
  10   2 -10   54.39    4.60
  -9  -2   9   19.70    4.10
  -9  -2   9   10.90    2.20
   9   2  -9   13.30    1.70
  -8  -2   8   19.70    2.90
   8   2  -8   17.20    2.00
  -7  -2   7   33.30    3.70
   7   2  -7   36.40    3.30
  -6  -2   6   11.80    1.90
   6   2  -6   14.00    1.40
  -5  -2   5   18.50    2.40
   5   2  -5   16.90    1.70
  -4  -2   4   41.80    3.80
   4   2  -4   42.90    3.50
  -3  -2   3  506.45   39.40
   3   2  -3  530.75   39.10
  -2  -2   2    1.70    0.70
   2   2  -2    2.10    0.40
   1   2  -1    2.40    0.40
   0  -2   0   44.20    3.70
   0   2   0   47.60    3.60
   1  -2  -1   23.40    1.90
  -1   2   1   21.30    1.80
   2  -2  -2    2.20    0.30
   2  -2  -2    3.30    0.70
  -2   2   2    2.80    0.30
  -3   2   3   47.90    4.00
  -4   2   4   29.60    2.80
  -5   2   5   11.60    1.70
  -6   2   6   30.40    3.10
  -7   2   7  259.47   20.40
  -8   2   8   24.50    2.80
  -9   2   9    0.20    0.90
 -10   2  10   -0.90    0.90
 -11   2  11   15.40    2.90
 -12   2  12   17.70    3.30
 -13   2  13   -0.10    1.40
 -14   2  14    7.80    2.50
 -15   2  15   -1.30    1.20
 -16   2  16    1.20    1.90
 -16  -1  15   -2.30    1.60
 -15  -1  14    4.60    2.10
 -14  -1  13    1.60    1.70
 -13  -1  12    8.50    2.50
 -12  -1  11    0.80    1.40
 -11  -1  10   13.10    2.60
 -10  -1   9   34.80    5.70
 -10  -1   9   27.20    3.80
  10   1  -9   27.60    2.60
  -9  -1   8    5.40    1.60
  -9  -1   8   11.50    3.10
   9   1  -8    5.90    1.00
  -8  -1   7   19.70    3.80
  -8  -1   7   15.60    2.50
   8   1  -7   15.40    1.70
  -7  -1   6  171.28   13.90
  -7  -1   6  183.08   15.10
   7   1  -6  170.78   13.30
  -6  -1   5    2.80    0.90
  -6  -1   5   10.00    2.50
   6   1  -5    4.20    0.70
  -5  -1   4    5.00    1.10
   5   1  -4    6.40    0.80
  -4  -1   3  365.66   28.10
   4   1  -3  369.36   27.80
  -3  -1   2   35.70    3.40
   3   1  -2   44.80    3.20
  -2  -1   1   21.70    2.10
   2   1  -1   24.20    1.90
  -1  -1   0    0.60    0.40
   1   1   0    0.10    0.10
   0  -1  -1  357.16   26.80
   1  -1  -2   15.50    1.20
   1  -1  -2   17.90    1.40
  -1   1   2   15.40    1.20
  -2   1   3   21.70    1.90
   3  -1  -4   72.29    5.60
  -3   1   4   73.89    6.00
  -3   1   4   74.69    5.60
   4  -1  -5  191.58   14.60
  -4   1   5  195.48   15.00
   5  -1  -6    1.40    0.30
  -5   1   6    0.50    1.00
  -5   1   6    0.90    0.70
   6  -1  -7    3.40    0.50
  -6   1   7    1.40    0.80
   7  -1  -8    9.50    1.20
  -7   1   8   10.10    1.90
   8  -1  -9    4.70    0.70
  -8   1   9    4.20    1.30
   9  -1 -10   44.60    3.50
  -9   1  10   39.00    4.40
 -10   1  11   17.50    3.00
 -11   1  12    4.60    1.70
 -12   1  13    2.90    1.70
 -13   1  14   22.70    3.90
 -14   1  15    2.50    1.50
 -15   1  16    3.00    2.10
 -16   1  17    4.30    2.20
 -16   0  14    1.00    1.90
 -15   0  13   -0.20    1.70
 -14   0  12    2.80    1.70
 -13   0  11   -0.40    1.50
 -12   0  10   -0.30    1.20
 -11   0   9    1.10    1.20
 -10   0   8    2.70    1.20
  10   0  -8    1.40    0.60
  -9   0   7   15.50    2.50
   9   0  -7   14.30    1.50
  -8   0   6    4.90    1.40
   8   0  -6    4.10    0.70
  -7   0   5   10.50    1.80
   7   0  -5   10.20    1.10
  -6   0   4   64.49    5.60
   6   0  -4   65.89    5.10
  -5   0   3   11.20    1.60
   5   0  -3   10.50    1.00
  -4   0   2   94.09    7.60
   4   0  -2   96.39    7.30
  -3   0   1  849.32   63.29
   3   0  -1  831.82   63.09
  -2   0   0   49.70    4.00
  -2   0   0   53.69    4.00
   2   0   0   50.49    3.90
  -1   0  -1  400.76   29.30
  -1   0  -1  375.36   29.30
   1   0   1  392.06   29.30
   0   0   2    3.20    0.30
   1   0  -3  692.73   51.99
  -1   0   3  696.43   52.09
  -1   0   3  689.43   51.99
   2   0  -4  162.68   12.10
  -2   0   4  156.78   12.30
   3   0  -5  222.68   16.70
  -3   0   5  217.98   17.00
   4   0  -6   19.00    1.70
  -4   0   6   21.40    2.10
   5   0  -7   63.99    5.10
  -5   0   7   67.09    5.60
   6   0  -8   54.89    4.30
  -6   0   8   55.59    4.90
  -6   0   8   51.19    5.80
   7   0  -9   13.80    1.50
  -7   0   9   28.00    4.40
  -7   0   9   17.00    2.50
   8   0 -10    1.00    0.50
  -8   0  10    2.60    1.70
  -8   0  10    1.30    1.00
   9   0 -11    0.70    0.50
  -9   0  11   -0.10    1.70
  -9   0  11   -1.10    0.90
 -10   0  12   -0.60    2.00
 -10   0  12   -0.40    0.80
 -11   0  13    0.30    1.30
 -12   0  14    0.80    1.50
 -13   0  15    3.40    1.90
 -14   0  16    0.30    1.50
 -15   0  17    0.30    1.40
 -16   0  18    3.60    2.20
 -17   1  14    1.70    2.10
 -16   1  13    1.60    1.90
 -15   1  12    2.40    1.90
 -14   1  11    1.30    1.70
 -13   1  10    1.20    1.60
 -12   1   9   14.00    2.80
 -11   1   8    1.50    1.40
 -10   1   7   10.10    2.10
  10  -1  -7    9.60    1.10
  -9   1   6    1.70    1.00
   9  -1  -6    0.10    0.40
  -8   1   5   24.20    3.20
   8  -1  -5   25.50    2.10
  -7   1   4    7.70    1.60
   7  -1  -4    7.00    0.80
  -6   1   3  137.19   10.70
   6  -1  -3  131.09   10.20
  -5   1   2    2.00    0.70
   5  -1  -2    2.20    0.40
  -4   1   1  455.65   36.00
   4  -1  -1  492.45   35.70
  -3   1   0    0.20    0.40
   3  -1   0    0.20    0.20
   1  -1   2   13.60    1.10
   0   1  -3  691.23   52.19
   0  -1   3  697.93   52.19
   1   1  -4   38.90    3.10
  -1  -1   4   38.80    3.10
   2   1  -5  138.29   10.60
  -2  -1   5  139.99   10.80
   3   1  -6   38.00    3.00
  -3  -1   6   36.00    3.30
   4   1  -7   18.40    1.70
  -4  -1   7   18.80    2.10
   5   1  -8    2.00    0.50
  -5  -1   8    2.60    0.90
   6   1  -9    3.50    0.70
  -6  -1   9    4.00    1.20
   7   1 -10   68.79    5.20
  -7  -1  10   59.19    5.80
   8   1 -11  114.59    9.30
  -8  -1  11  118.79   11.40
  -8  -1  11  125.89   10.20
   9   1 -12   20.50    1.90
  -9  -1  12   16.70    2.70
  -9  -1  12   10.20    3.30
  10   1 -13    0.40    0.70
 -10  -1  13    0.90    1.90
 -10  -1  13    1.10    1.10
 -11  -1  14    4.60    1.80
 -11  -1  14    1.90    2.40
 -12  -1  15   -0.70    2.50
 -12  -1  15    1.60    1.40
 -13  -1  16    6.80    2.20
 -14  -1  17    1.50    1.70
 -15  -1  18    2.20    1.80
 -17   2  13    0.70    2.00
 -16   2  12    2.00    2.00
 -15   2  11   -1.00    1.40
 -14   2  10   10.40    2.70
 -13   2   9    2.40    1.70
 -12   2   8    0.40    1.10
 -11   2   7    1.00    1.20
 -10   2   6    5.00    1.50
  -9   2   5    1.80    1.10
   9  -2  -5    1.50    0.40
  -8   2   4   15.10    2.40
   8  -2  -4   17.20    1.50
  -7   2   3   22.00    2.30
   7  -2  -3   18.00    1.60
  -6   2   2   19.50    2.20
   6  -2  -2   20.60    1.70
  -5   2   1   15.20    1.80
   5  -2  -1   13.50    1.20
  -4   2   0 2804.72  206.18
   4  -2   0 2686.13  205.98
  -3   2  -1  492.55   37.20
   3  -2   1  493.45   37.10
   2  -2   2    3.30    0.50
  -1   2  -3   30.50    2.50
   1  -2   3   30.90    2.40
   0   2  -4  152.28   12.00
   0  -2   4  162.28   12.00
   1   2  -5  111.59    8.30
  -1  -2   5  103.69    8.30
   2   2  -6   47.50    3.80
  -2  -2   6   45.80    3.90
   3   2  -7   78.39    6.30
  -3  -2   7   81.69    6.50
   4   2  -8    2.40    0.60
  -4  -2   8    2.30    0.80
   5   2  -9   22.70    2.20
  -5  -2   9   24.60    2.60
   6   2 -10    1.80    1.10
  -6  -2  10    1.30    0.90
   7   2 -11   71.89    5.80
  -7  -2  11   68.89    6.30
   8   2 -12   64.09    5.30
  -8  -2  12   64.79    6.10
   9   2 -13   23.80    2.50
  -9  -2  13   22.40    3.50
  10   2 -14   -0.10    0.70
 -10  -2  14   -0.30    1.10
 -10  -2  14    0.20    2.00
 -11  -2  15    3.30    1.60
 -11  -2  15    4.30    3.10
 -12  -2  16    1.30    1.30
 -12  -2  16    1.40    2.90
 -13  -2  17    5.80    2.10
 -13  -2  17    5.90    3.50
 -14  -2  18   -0.30    1.20
 -14  -2  18    2.10    3.10
 -15  -2  19    1.00    1.70
 -17   3  12   -0.40    1.80
 -16   3  11   -1.20    1.50
 -15   3  10   -0.40    1.50
 -14   3   9   -1.50    1.30
 -13   3   8    1.90    1.60
 -12   3   7    0.00    1.10
 -11   3   6    7.60    1.90
 -10   3   5    2.90    1.20
  -9   3   4   16.00    2.40
   9  -3  -4   12.40    1.20
  -8   3   3    5.80    1.40
   8  -3  -3    4.90    0.70
  -7   3   2   51.09    4.50
   7  -3  -2   49.40    3.90
  -6   3   1   69.39    5.70
   6  -3  -1   66.59    5.20
  -5   3   0    0.20    0.60
   5  -3   0   -0.30    0.30
  -4   3  -1 9780.22  729.23
   4  -3   1 9648.04  728.73
   3  -3   2  216.08   16.50
  -2   3  -3  524.85   38.60
   2  -3   3  499.65   38.60
  -1   3  -4   18.50    1.50
   1  -3   4   12.00    1.50
   0   3  -5  216.18   16.30
   0  -3   5  209.68   16.40
   1   3  -6   81.19    6.80
  -1  -3   6   91.49    6.90
   2   3  -7    4.40    0.80
  -2  -3   7    4.70    0.90
   3   3  -8    5.60    0.80
  -3  -3   8    3.30    0.90
   4   3  -9   77.19    6.00
  -4  -3   9   72.19    6.30
   5   3 -10   34.30    3.00
  -5  -3  10   31.70    3.40
   6   3 -11    0.80    0.60
  -6  -3  11    0.80    0.90
   7   3 -12    1.60    0.80
  -7  -3  12    0.70    0.90
   8   3 -13    0.70    0.80
  -8  -3  13   -0.10    0.90
   9   3 -14    8.90    1.50
  -9  -3  14    8.90    2.00
  10   3 -15   13.90    1.90
 -10  -3  15   13.60    2.80
 -11  -3  16    1.50    1.50
 -12  -3  17    2.10    1.50
 -12  -3  17    1.40    2.90
 -13  -3  18    7.20    2.20
 -13  -3  18    3.10    3.30
 -14  -3  19    0.80    3.10
 -14  -3  19    0.10    1.60
 -15  -3  20    0.20    1.60
 -15  -3  20    2.90    3.70
 -17   4  11    1.60    2.00
 -16   4  10    6.60    2.50
 -15   4   9   -0.10    1.70
 -14   4   8    2.00    1.70
 -13   4   7    1.10    1.50
 -12   4   6    0.40    1.00
 -11   4   5   -0.30    1.00
 -10   4   4   15.80    2.50
  -9   4   3    7.10    1.70
   9  -4  -3    8.00    0.90
  -8   4   2    2.50    1.00
   8  -4  -2    2.50    0.50
  -7   4   1   52.29    4.70
   7  -4  -1   51.39    4.10
  -6   4   0   85.39    7.40
   6  -4   0   94.59    7.00
  -5   4  -1    9.20    1.50
   5  -4   1   14.50    1.20
  -3   4  -3   94.19    7.40
   3  -4   3   96.19    7.40
  -2   4  -4   38.80    3.40
   2  -4   4   42.90    3.40
  -1   4  -5   66.79    5.00
   1  -4   5   56.29    5.00
   0   4  -6   22.20    2.00
   0  -4   6   21.20    2.60
   1   4  -7  139.79   11.20
  -1  -4   7  163.18   13.00
  -1  -4   7  138.49   11.50
   2   4  -8  245.18   18.80
  -2  -4   8  246.48   19.00
  -2  -4   8  242.68   20.40
   3   4  -9    0.80    0.60
  -3  -4   9    0.00    0.50
  -3  -4   9    1.20    1.80
   4   4 -10  185.28   14.50
  -4  -4  10  190.38   14.90
   5   4 -11   18.20    2.20
  -5  -4  11   23.30    2.90
   6   4 -12   15.60    2.00
  -6  -4  12   17.90    2.60
   7   4 -13    6.30    1.30
  -7  -4  13    8.80    1.80
   8   4 -14    0.40    0.90
  -8  -4  14   -0.20    0.90
   9   4 -15    1.60    1.00
  -9  -4  15    0.30    1.20
  10   4 -16    0.00    1.00
 -10  -4  16   -1.20    1.10
 -11  -4  17    1.70    1.70
 -12  -4  18    2.80    1.70
 -13  -4  19    4.70    2.30
 -13  -4  19    6.40    3.80
 -14  -4  20   -0.50    1.60
 -14  -4  20    1.80    2.90
 -17   5  10    3.40    2.10
 -16   5   9    0.60    1.70
 -15   5   8    0.50    1.70
 -14   5   7    1.00    1.40
 -13   5   6    5.30    2.00
 -12   5   5    4.10    1.60
 -11   5   4    4.80    1.60
 -10   5   3    1.40    1.10
  -9   5   2    0.10    0.90
   9  -5  -2   -0.90    0.40
  -8   5   1 1031.80   76.99
   8  -5  -1  999.90   76.29
  -7   5   0    0.40    0.80
   7  -5   0    0.00    0.40
  -6   5  -1    0.80    0.70
   6  -5   1    1.00    0.50
  -5   5  -2    1.60    0.70
   5  -5   2    1.30    0.50
  -4   5  -3  148.59   11.40
   4  -5   3  145.59   11.40
  -3   5  -4    2.90    0.60
   3  -5   4    1.30    0.50
  -2   5  -5   15.00    1.70
   2  -5   5   17.70    1.70
  -1   5  -6   39.30    3.20
   1  -5   6   35.20    3.40
   0   5  -7   61.09    5.20
   0  -5   7   65.39    5.70
   1   5  -8   31.40    3.10
  -1  -5   8   42.70    3.70
  -1  -5   8   35.60    4.80
   2   5  -9   52.89    4.50
  -2  -5   9   47.00    4.80
  -2  -5   9   63.19    6.50
   3   5 -10    4.50    1.00
  -3  -5  10    4.90    2.50
  -3  -5  10    5.70    1.40
   4   5 -11    4.40    1.00
  -4  -5  11    1.40    1.10
   5   5 -12   37.40    3.30
  -5  -5  12   32.50    3.70
   6   5 -13    1.00    0.80
  -6  -5  13    2.80    1.30
   7   5 -14    0.40    0.90
  -7  -5  14    1.40    1.10
   8   5 -15    1.90    1.00
  -8  -5  15   -0.10    0.90
   9   5 -16   13.80    2.10
  -9  -5  16   13.60    2.80
  10   5 -17    0.20    1.70
 -10  -5  17   -0.10    1.40
  11   5 -18    6.40    1.70
 -11  -5  18    4.40    2.00
 -12  -5  19    0.80    1.50
 -13  -5  20   -1.50    1.50
 -14  -5  21   -0.60    1.50
 -14  -5  21    0.40    3.40
 -16   6   8    1.40    1.90
 -15   6   7    0.80    1.50
 -14   6   6    1.20    1.40
 -13   6   5    0.70    1.40
 -12   6   4   15.40    2.80
 -11   6   3    1.10    1.20
 -10   6   2   14.70    2.40
  -9   6   1    9.30    1.80
  -8   6   0 1022.40   80.89
   8  -6   0 1111.49   80.39
  -7   6  -1  113.89    8.80
   7  -6   1  102.09    8.40
  -6   6  -2    2.80    1.00
   6  -6   2    3.70    0.80
  -5   6  -3   31.10    3.00
   5  -6   3   35.70    3.30
  -4   6  -4   10.30    1.30
   4  -6   4    9.60    1.40
  -3   6  -5   61.49    5.20
   3  -6   5   64.29    5.20
  -2   6  -6   12.40    1.60
   2  -6   6   13.20    1.50
  -1   6  -7   50.39    4.30
   1  -6   7   46.80    5.90
   1  -6   7   52.59    4.50
   0   6  -8   55.09    4.60
   0  -6   8   49.70    5.10
   0  -6   8   54.69    6.50
   1   6  -9   54.99    4.60
  -1  -6   9   46.30    6.30
  -1  -6   9   57.29    5.20
   2   6 -10    1.50    1.40
  -2  -6  10   -3.20    1.40
  -2  -6  10    1.00    1.10
   3   6 -11    0.40    0.70
  -3  -6  11    1.80    2.10
  -3  -6  11   -0.40    0.90
   4   6 -12   19.90    2.30
  -4  -6  12   19.30    2.80
   5   6 -13   27.50    3.10
  -5  -6  13   35.90    3.70
   6   6 -14    6.70    1.50
  -6  -6  14    5.80    1.70
   7   6 -15    0.60    0.90
  -7  -6  15    0.00    1.00
   8   6 -16    1.70    1.10
  -8  -6  16   -0.20    1.20
   9   6 -17   -0.20    1.20
  -9  -6  17   -1.10    1.10
  10   6 -18    0.90    1.20
 -10  -6  18    1.80    1.60
  11   6 -19    4.80    1.60
 -11  -6  19    3.80    2.30
 -12  -6  20   -1.70    1.50
 -13  -6  21   -1.20    1.40
 -16   7   7    0.60    1.60
 -15   7   6   -0.30    1.50
 -14   7   5    4.20    2.00
 -13   7   4    1.70    1.50
 -12   7   3    2.20    1.50
 -11   7   2   22.50    3.20
 -10   7   1   11.60    2.20
  -9   7   0    1.50    1.10
   8  -7   1   14.20    1.60
  -7   7  -2    7.40    1.50
   7  -7   2   14.20    1.50
  -5   7  -4   22.20    2.20
   5  -7   4   20.80    2.30
  -4   7  -5   39.00    3.50
   4  -7   5   39.70    3.50
  -3   7  -6   11.70    1.90
   3  -7   6   13.20    1.90
  -2   7  -7   35.90    3.70
   2  -7   7   39.20    3.60
  -1   7  -8    0.70    1.30
   1  -7   8    2.00    3.00
   1  -7   8    0.70    1.10
   0   7  -9   13.40    1.90
   0  -7   9   34.50    5.90
   0  -7   9    9.60    2.70
   1   7 -10    4.60    1.20
  -1  -7  10   13.10    3.90
  -1  -7  10    6.90    2.00
   2   7 -11   38.10    3.60
  -2  -7  11   51.19    7.70
  -2  -7  11   35.20    4.20
   3   7 -12    0.50    0.80
  -3  -7  12   -1.70    0.90
   4   7 -13    9.40    1.70
  -4  -7  13   10.30    2.20
   5   7 -14   13.00    2.00
  -5  -7  14    8.20    2.10
   6   7 -15   17.50    2.40
  -6  -7  15   17.80    3.10
   7   7 -16   23.70    2.90
  -7  -7  16   21.40    3.70
   8   7 -17   11.90    2.00
  -8  -7  17    7.90    2.40
   9   7 -18    0.40    1.30
  -9  -7  18    3.20    1.90
  10   7 -19   -1.30    1.10
 -10  -7  19   -1.60    1.10
  11   7 -20    0.70    1.50
 -11  -7  20   -0.50    1.40
 -12  -7  21    1.00    2.00
 -13  -7  22    3.20    2.30
 -15   8   5    0.00    1.40
 -14   8   4   -0.30    1.40
 -13   8   3    4.60    1.90
 -12   8   2   60.29    6.00
 -11   8   1   24.50    3.40
 -10   8   0    1.00    1.20
  -9   8  -1    7.80    1.70
  -8   8  -2   19.50    2.70
   8  -8   2   19.80    2.20
  -7   8  -3    6.40    1.30
   7  -8   3    0.40    1.70
   7  -8   3    4.10    0.90
  -6   8  -4    5.60    1.10
   6  -8   4    6.20    1.20
   6  -8   4    1.00    2.10
  -5   8  -5    8.20    1.40
   5  -8   5    2.30    2.40
   5  -8   5   10.90    1.50
  -4   8  -6   47.00    4.20
   4  -8   6   49.80    4.20
  -3   8  -7   30.50    3.00
   3  -8   7   32.40    2.90
   3  -8   7   27.00    5.60
  -2   8  -8   13.10    1.90
   2  -8   8    6.20    3.10
   2  -8   8   20.90    2.00
  -1   8  -9    7.30    1.30
   1  -8   9   11.30    1.80
   1  -8   9    2.60    2.40
   0   8 -10    1.20    0.80
   0  -8  10    1.90    1.60
   0  -8  10   -0.60    1.90
   1   8 -11    2.30    0.90
  -1  -8  11    3.60    2.00
  -1  -8  11    0.50    2.10
   2   8 -12    9.20    1.60
  -2  -8  12   10.00    2.50
   3   8 -13   29.60    3.20
  -3  -8  13   33.10    4.50
   4   8 -14   -0.20    1.10
  -4  -8  14   -0.80    1.20
   5   8 -15    4.00    1.30
  -5  -8  15    4.70    1.80
   6   8 -16    4.80    1.40
  -6  -8  16    1.80    1.60
   7   8 -17    5.80    1.70
  -7  -8  17    2.70    1.80
   8   8 -18    4.30    1.60
  -8  -8  18    0.90    1.50
   9   8 -19   -1.50    1.10
  -9  -8  19   -1.30    1.60
  10   8 -20    2.30    1.70
 -10  -8  20    1.50    1.70
  11   8 -21    0.00    1.30
 -11  -8  21    0.80    2.20
 -12  -8  22    1.00    2.10
 -12   9   1   56.79    8.00
 -11   9   0   -1.00    1.30
 -10   9  -1   29.40    3.50
  -9   9  -2    2.50    1.30
  -8   9  -3    5.90    1.40
   8  -9   3    3.90    1.00
   7  -9   4    0.20    2.60
   7  -9   4    4.10    1.10
  -6   9  -5    0.40    0.70
   6  -9   5    2.20    2.20
   6  -9   5    0.50    0.80
  -5   9  -6    1.80    0.90
   5  -9   6    1.10    0.80
   5  -9   6    2.80    2.50
  -4   9  -7    1.60    0.90
   4  -9   7   -0.30    1.80
   4  -9   7    0.80    0.60
  -3   9  -8    0.20    0.80
   3  -9   8    2.00    0.80
   3  -9   8    0.30    2.10
  -2   9  -9   11.00    1.80
   2  -9   9   17.10    4.60
   2  -9   9   10.20    1.70
  -1   9 -10   21.70    2.70
   1  -9  10   30.20    6.20
   1  -9  10   22.80    3.00
   0   9 -11    1.50    0.90
   0  -9  11    0.50    1.90
   0  -9  11   -1.50    1.40
   1   9 -12    3.00    1.10
  -1  -9  12   -2.40    1.70
  -1  -9  12   -1.10    1.60
   2   9 -13    1.00    1.00
  -2  -9  13   -0.10    1.80
   3   9 -14   -1.20    0.90
  -3  -9  14    0.50    1.60
   4   9 -15    2.20    1.20
  -4  -9  15    1.80    1.70
   5   9 -16    7.50    1.70
  -5  -9  16    2.90    1.90
   6   9 -17   -2.90    1.10
  -6  -9  17   -1.20    1.30
   7   9 -18    9.10    2.10
  -7  -9  18    6.00    2.40
   8   9 -19   -1.70    1.20
  -8  -9  19    0.50    1.70
   9   9 -20   -0.60    1.70
  -9  -9  20   -0.60    1.70
  10   9 -21    0.40    1.50
 -10  -9  21   -0.80    1.90
  11   9 -22   -3.90    1.50
 -11  -9  22   -1.60    1.70
   8 -10   4   -0.30    0.80
   7 -10   5   -1.50    2.00
  -6  10  -6   -0.70    0.80
   6 -10   6   -1.30    1.90
  -5  10  -7    1.70    0.90
   5 -10   7    0.70    2.60
  -4  10  -8   -0.80    1.00
   4 -10   8    0.20    2.60
   4 -10   8   -0.30    1.00
  -3  10  -9    3.20    1.30
   3 -10   9    2.70    1.00
   3 -10   9    0.20    2.60
  -2  10 -10   58.59    4.80
   2 -10  10   35.80    7.50
   2 -10  10   47.70    4.50
  -1  10 -11    8.50    1.90
   1 -10  11    5.50    3.20
   1 -10  11    8.50    1.80
   0  10 -12   -0.30    0.90
   0 -10  12    3.40    2.00
   1  10 -13    1.90    1.00
  -1 -10  13   -0.70    1.80
   2  10 -14    7.10    1.70
  -2 -10  14    5.70    3.00
   3  10 -15   31.80    3.80
  -3 -10  15   34.10    5.20
   4  10 -16    0.90    1.30
  -4 -10  16   -2.20    1.40
   5  10 -17   12.90    2.90
  -5 -10  17    8.50    3.00
   6  10 -18    1.00    1.40
  -6 -10  18    2.20    2.00
   7  10 -19    2.60    1.70
  -7 -10  19   -1.80    1.60
   8  10 -20   -0.30    1.80
  -8 -10  20    0.40    2.00
   9  10 -21   -0.50    1.50
  -9 -10  21   -1.80    1.90
  10  10 -22   -0.50    1.80
 -10 -10  22   -1.60    1.80
  -7  11  -6    0.80    0.90
   7 -11   6   -1.80    2.50
  -6  11  -7   -0.50    0.80
   6 -11   7    0.70    2.40
  -5  11  -8    3.40    1.20
   5 -11   8    1.50    2.80
  -4  11  -9   -0.30    0.80
   4 -11   9   -2.60    2.20
  -3  11 -10    2.20    1.10
   3 -11  10   -0.90    2.70
  -2  11 -11    5.50    1.50
   2 -11  11    7.90    3.80
  -1  11 -12    0.40    1.10
   0  11 -13    2.30    1.30
   1  11 -14    2.20    1.30
   2  11 -15    0.90    1.30
  -2 -11  15   -1.60    2.50
   3  11 -16   15.70    2.70
  -3 -11  16    5.10    2.90
   4  11 -17    7.00    2.00
  -4 -11  17    3.40    2.70
   5  11 -18    1.60    1.50
  -5 -11  18    0.80    2.20
   6  11 -19   -0.10    1.50
  -6 -11  19   -0.70    1.90
   7  11 -20   -0.70    1.70
  -7 -11  20   -3.00    1.90
   8  11 -21    1.90    1.90
  -8 -11  21   -3.00    1.70
   9  11 -22    1.70    2.30
  -9 -11  22   -1.90    2.00
  -7  12  -7    0.20    1.10
  -6  12  -8    7.30    2.00
  -5  12  -9    2.60    1.30
  -4  12 -10    1.60    1.20
  -3  12 -11    0.30    1.10
  -2  12 -12   -0.40    1.10
  -1  12 -13    6.00    1.80
   0  12 -14    2.40    1.90
   1  12 -15    4.00    2.00
   2  12 -16    0.80    1.40
   3  12 -17    0.30    1.50
   4  12 -18    2.10    1.70
   5  12 -19   -2.70    1.50
   6  12 -20   -1.60    1.50
   7  12 -21    0.60    1.80
   8  12 -22   -2.50    2.20
  -7  13  -8   -0.40    1.10
  -6  13  -9    7.00    1.70
  -5  13 -10   -0.60    1.20
  -4  13 -11    1.00    1.40
  -3  13 -12    3.20    1.60
  -2  13 -13    5.50    1.80
  -1  13 -14   14.30    2.60
   0  13 -15    3.20    1.70
   1  13 -16   -0.40    1.40
   2  13 -17    3.20    1.80
   3  13 -18   -3.40    1.60
   4  13 -19   -3.50    1.50
   5  13 -20   -1.80    1.70
   6  13 -21    0.10    2.00
   7  13 -22    0.30    2.40
  -6  14 -10    3.40    1.70
  -5  14 -11    5.70    1.90
  -4  14 -12   -0.70    1.20
  -3  14 -13   -0.50    1.50
  -2  14 -14   -1.90    1.40
  -1  14 -15    4.10    1.90
   0  14 -16    1.50    1.90
   1  14 -17    1.30    1.90
   2  14 -18    3.90    2.10
   3  14 -19    0.00    1.70
   4  14 -20    2.10    2.10
   5  14 -21   -0.30    2.20
  -6  15 -11    0.30    1.40
  -5  15 -12    2.20    1.70
  -4  15 -13    0.80    1.60
  -3  15 -14    1.10    1.70
  -2  15 -15    2.20    1.80
  -1  15 -16   -0.60    1.60
   0  15 -17    2.90    2.00
   1  15 -18    0.30    1.90
   2  15 -19   -1.40    1.80
   3  15 -20    0.00    2.30
  -6  16 -12    4.50    2.70
  -5  16 -13   -1.20    1.60
  -4  16 -14    2.00    2.10
  -3  16 -15    2.10    1.90
  -2  16 -16    0.60    2.10
  -1  16 -17    2.60    2.40
   0  16 -18    1.20    2.30
   1  17 -14    2.00    2.10
   0  17 -13    1.30    2.30
  -1  17 -12   -1.50    2.00
  -2  17 -11    2.30    2.40
  -3  17 -10    2.00    2.20
  -4  17  -9    0.90    2.10
   4  16 -16    1.80    2.20
   3  16 -15    1.40    2.00
   2  16 -14    2.30    1.90
   1  16 -13    9.10    2.60
   0  16 -12    2.30    2.00
  -1  16 -11    4.30    2.10
  -2  16 -10    3.70    1.90
  -3  16  -9   -0.90    1.50
  -4  16  -8   -2.10    1.30
   6  15 -17   -1.50    2.30
   5  15 -16   -0.60    1.80
   4  15 -15   -1.40    1.70
   3  15 -14   -1.70    1.50
   2  15 -13    0.80    1.70
   1  15 -12    2.10    1.90
   0  15 -11   -0.20    1.60
  -1  15 -10   -0.90    1.40
  -2  15  -9   -1.50    1.40
  -3  15  -8    0.60    1.40
  -4  15  -7   -0.80    1.40
  -5  15  -6    0.70    1.40
   8  14 -18    1.60    2.10
   7  14 -17    1.00    2.10
   6  14 -16   -2.50    1.50
   5  14 -15    4.00    2.00
   4  14 -14    7.30    2.50
   3  14 -13   -0.30    1.60
   2  14 -12   13.90    2.70
   1  14 -11    2.20    1.70
   0  14 -10    1.50    1.60
  -1  14  -9    1.50    1.50
  -2  14  -8    1.40    1.40
  -3  14  -7    0.60    1.40
  -4  14  -6    0.00    1.30
  -5  14  -5    1.40    1.30
  -9 -13  18   -4.30    2.70
   9  13 -18    0.60    2.30
  -8 -13  17   -2.00    2.90
   8  13 -17   -2.30    1.80
  -7 -13  16   -6.90    2.60
   7  13 -16    1.00    1.90
  -6 -13  15    1.90    3.40
   6  13 -15    1.40    2.00
  -5 -13  14   -6.50    2.90
   5  13 -14    2.20    1.70
  -4 -13  13   -5.30    2.90
   4  13 -13    0.50    1.40
  -3 -13  12   -5.80    2.80
   3  13 -12   -0.60    1.40
  -2 -13  11   10.50    4.20
   2  13 -11    8.70    2.20
  -1 -13  10    4.30    2.40
   1  13 -10   -0.40    1.90
   0 -13   9    8.40    2.30
   0  13  -9    3.00    1.70
   1 -13   8    5.10    2.60
  -1  13  -8   -0.50    1.10
  -2  13  -7   -0.30    1.00
  -3  13  -6   -0.50    1.00
  -4  13  -5    2.20    1.40
  -5  13  -4    1.10    1.70
  -6  13  -3   -0.10    1.30
 -10 -12  18    1.00    2.90
  10  12 -18    2.10    2.50
  -9 -12  17   -3.00    2.10
   9  12 -17    2.40    2.10
  -8 -12  16    3.30    3.10
   8  12 -16   -0.60    1.70
  -7 -12  15    1.50    2.90
   7  12 -15   -0.80    1.50
  -6 -12  14   -3.70    2.60
   6  12 -14    2.60    1.80
  -5 -12  13   -1.80    2.80
   5  12 -13   -0.40    1.40
  -4 -12  12    2.00    3.30
   4  12 -12   -1.50    1.90
  -3 -12  11   -4.70    2.30
   3  12 -11    0.60    1.30
  -2 -12  10    2.20    2.60
   2  12 -10    2.30    1.30
  -1 -12   9   12.40    3.00
   1  12  -9   12.70    2.10
   0 -12   8    3.50    1.80
   0  12  -8    4.40    1.50
   1 -12   7    8.20    1.90
  -1  12  -7    2.50    1.30
   2 -12   6    0.70    1.20
  -2  12  -6   -1.90    0.90
   3 -12   5    0.50    1.10
  -3  12  -5   -0.30    0.90
   4 -12   4    1.40    1.10
  -4  12  -4    0.90    1.00
   5 -12   3    2.80    1.20
  -5  12  -3    2.10    1.10
   6 -12   2    1.50    1.30
  -6  12  -2    0.60    0.90
   7 -12   1    3.90    2.20
 -11 -11  18   -2.70    2.00
  11  11 -18   -4.00    1.80
 -10 -11  17   -1.00    2.20
  10  11 -17   -3.20    1.40
  -9 -11  16    4.10    2.80
   9  11 -16    7.80    2.30
  -8 -11  15   -1.00    2.10
   8  11 -15   -1.70    1.40
  -7 -11  14    1.90    2.40
   7  11 -14    3.70    1.70
  -6 -11  13   -0.80    2.40
   6  11 -13    4.10    2.20
  -5 -11  12   -1.60    2.50
   5  11 -12    0.90    1.30
  -4 -11  11    4.50    3.40
   4  11 -11    8.10    1.80
  -3 -11  10   -1.00    2.50
   3  11 -10   -0.50    1.00
  -2 -11   9    5.80    3.00
   2  11  -9    7.60    1.60
  -1 -11   8    4.80    2.40
   1  11  -8    6.00    1.50
   0 -11   7    5.30    2.10
   0  11  -7    4.20    1.50
   1 -11   6   45.40    4.70
  -1  11  -6   43.40    4.30
   2 -11   5    5.20    1.60
  -2  11  -5    2.90    1.30
   3 -11   4    2.00    1.40
  -3  11  -4    0.80    1.00
   4 -11   3    2.20    1.20
  -4  11  -3   -1.60    0.60
   5 -11   2    0.50    1.00
  -5  11  -2   -0.70    0.70
   6 -11   1    0.60    1.10
  -6  11  -1    0.40    0.80
   7 -11   0   -1.10    1.00
   8 -11  -1    0.70    1.30
  -9  11   2   14.60    2.90
 -10  11   3    0.70    1.50
 -11  11   4    3.70    1.80
 -12  11   5    1.00    1.70
 -12 -10  18   -2.00    2.20
  12  10 -18    1.70    2.30
 -11 -10  17   -2.40    1.80
  11  10 -17    0.20    1.60
 -10 -10  16   -2.30    1.70
  10  10 -16    0.60    1.80
  -9 -10  15    0.20    2.20
   9  10 -15    6.40    1.80
  -8 -10  14    0.70    2.20
   8  10 -14   -0.90    1.20
  -7 -10  13   -1.10    1.90
   7  10 -13   -0.40    1.40
  -6 -10  12    6.90    2.80
   6  10 -12    6.30    1.60
  -5 -10  11   -0.30    2.00
   5  10 -11    0.80    1.10
  -4 -10  10    2.30    2.60
   4  10 -10    2.70    1.20
  -3 -10   9   -0.50    2.20
   3  10  -9    1.90    1.10
  -2 -10   8    2.00    2.40
   2  10  -8    4.50    1.30
  -1 -10   7    4.00    2.30
   1  10  -7    4.90    1.30
   0 -10   6    3.80    1.60
   0  10  -6   -0.50    0.70
   1 -10   5    6.50    1.70
  -1  10  -5    8.30    1.50
   2 -10   4    2.90    1.10
  -2  10  -4    1.50    0.90
   3 -10   3    7.50    1.60
  -3  10  -3    6.10    1.30
   4 -10   2    1.10    1.00
  -4  10  -2   -1.10    0.50
   5 -10   1    0.10    0.90
  -5  10  -1   -0.90    0.60
   6 -10   0    3.80    1.50
  -6  10   0    5.10    1.10
   7 -10  -1    0.50    1.10
  -9  10   3   36.60    4.30
 -10  10   4   -0.10    1.50
 -11  10   5    0.00    1.40
 -12  10   6    0.30    1.60
 -13  10   7    0.10    1.50
 -14  10   8   -1.20    1.40
 -13  -9  18   -3.10    2.20
 -12  -9  17   -1.00    1.90
  12   9 -17   -2.40    1.30
 -11  -9  16   -0.80    2.10
  11   9 -16   -0.90    1.50
 -10  -9  15    1.70    2.20
  10   9 -15    5.40    1.70
  -9  -9  14    5.10    2.70
   9   9 -14   15.70    2.50
  -8  -9  13   -0.40    1.50
   8   9 -13    2.00    1.40
  -7  -9  12    1.10    1.70
   7   9 -12    0.20    1.00
  -6  -9  11   12.00    3.20
   6   9 -11   13.40    2.10
  -5  -9  10   12.10    3.10
   5   9 -10   11.00    2.00
  -4  -9   9   -1.20    1.60
   4   9  -9    0.40    1.00
  -3  -9   8    0.70    2.10
   3   9  -8    1.40    0.90
  -2  -9   7    2.80    2.40
   2   9  -7    4.50    1.20
  -1  -9   6    0.40    1.90
   1   9  -6    0.70    0.70
   0  -9   5   10.00    2.20
   0   9  -5    8.60    1.50
   1  -9   4   87.59    7.30
  -1   9  -4   80.69    6.90
   2  -9   3   71.19    6.40
  -2   9  -3   76.59    6.20
   3  -9   2   17.40    2.30
  -3   9  -2   12.90    1.80
   4  -9   1    1.80    1.00
  -4   9  -1    2.10    0.80
   5  -9   0   -1.20    0.70
  -5   9   0    0.80    0.60
   6  -9  -1    1.10    1.00
  -6   9   1    1.10    0.70
   7  -9  -2    7.80    2.00
  -8   9   3    8.20    1.90
  -9   9   4   -0.40    1.20
 -10   9   5    7.10    2.10
 -11   9   6    2.90    1.80
 -12   9   7    1.20    1.40
 -13   9   8    1.90    1.70
 -14   9   9    1.40    1.90
 -15   9  10    0.10    1.70
 -14  -8  18   -1.60    2.20
 -13  -8  17    1.50    1.90
 -12  -8  16    1.40    2.10
  12   8 -16   -1.70    1.30
 -11  -8  15    0.50    1.80
  11   8 -15    0.10    1.20
 -10  -8  14    1.20    1.90
  10   8 -14    3.20    1.60
  -9  -8  13   -1.70    1.40
   9   8 -13   -0.30    1.20
  -8  -8  12   13.40    3.30
   8   8 -12   16.00    2.30
  -7  -8  11    8.10    2.50
   7   8 -11    9.80    1.90
  -6  -8  10   19.90    3.90
   6   8 -10   26.20    3.00
  -5  -8   9   17.10    3.30
   5   8  -9   12.80    2.00
  -4  -8   8    3.00    1.90
   4   8  -8    2.10    0.90
  -3  -8   7   19.50    4.00
   3   8  -7   26.20    2.60
  -2  -8   6    9.70    3.00
   2   8  -6   11.50    1.60
  -1  -8   5   23.40    4.10
   1   8  -5   26.20    2.60
   0  -8   4   13.10    2.90
   0   8  -4    7.60    1.60
   1  -8   3   34.20    3.90
  -1   8  -3   27.40    3.00
   2  -8   2   13.60    2.30
  -2   8  -2   15.30    1.90
   3  -8   1    0.80    0.90
  -3   8  -1   -0.60    0.50
   4  -8   0  149.39   11.70
  -4   8   0  140.89   11.30
   5  -8  -1    2.70    1.10
  -5   8   1    1.20    0.60
   6  -8  -2   40.10    4.00
  -6   8   2   40.00    3.40
   7  -8  -3    5.20    1.60
  -7   8   3    5.90    0.90
  -8   8   4   -0.40    1.00
  -9   8   5    4.80    1.70
 -10   8   6    1.10    1.30
 -11   8   7    2.40    1.70
 -12   8   8   -1.80    1.10
 -13   8   9   -0.50    1.40
 -14   8  10    0.50    1.60
 -15   8  11    0.00    1.80
 -14  -7  17    1.20    2.10
 -13  -7  16    0.80    2.00
 -12  -7  15   -0.20    1.70
  12   7 -15   -0.10    1.30
 -11  -7  14   -0.30    1.50
  11   7 -14    1.40    1.30
 -10  -7  13    5.00    2.00
  10   7 -13    7.00    1.70
  -9  -7  12   -0.10    1.20
   9   7 -12   -0.80    1.00
  -8  -7  11    3.80    1.90
   8   7 -11    4.30    1.30
  -7  -7  10   -0.60    1.20
   7   7 -10    0.40    0.80
  -6  -7   9    3.80    1.90
   6   7  -9    5.30    1.20
  -5  -7   8    1.40    1.40
   5   7  -8    0.10    0.70
  -4  -7   7   33.00    4.70
   4   7  -7   41.10    3.60
  -3  -7   6    4.90    2.40
   3   7  -6    2.60    1.30
  -2  -7   5   65.99    6.60
   2   7  -5   61.59    5.30
  -1  -7   4    5.90    2.20
   1   7  -4    5.60    1.10
   0  -7   3    1.80    1.20
   0   7  -3    2.00    0.70
   1  -7   2   87.69    7.60
  -1   7  -2   94.09    7.30
   2  -7   1    1.00    0.90
  -2   7  -1    0.40    0.50
   3  -7   0   -0.10    0.70
  -3   7   0    0.10    0.50
   4  -7  -1   40.90    4.20
  -4   7   1   37.50    3.40
   5  -7  -2   39.30    4.00
  -5   7   2   42.90    3.50
   6  -7  -3    1.10    1.00
  -6   7   3    1.30    0.50
  -7   7   4    1.60    1.00
  -8   7   5    6.00    1.60
  -9   7   6    0.40    1.20
 -10   7   7   -0.20    1.10
 -11   7   8    1.40    1.30
 -12   7   9   -0.30    1.30
 -13   7  10   -1.40    1.50
 -14   7  11    1.80    1.70
 -15   7  12   -0.90    1.70
 -15  -6  17   -1.50    1.80
 -15  -6  17    0.30    3.50
 -14  -6  16    0.50    3.10
 -14  -6  16    0.50    1.80
 -13  -6  15    1.90    1.90
 -12  -6  14    1.40    1.50
  12   6 -14   -0.70    1.20
 -11  -6  13    1.60    1.90
  11   6 -13    4.10    1.80
 -10  -6  12    1.90    1.50
  10   6 -12    4.30    1.30
  -9  -6  11   -0.70    1.10
   9   6 -11    0.20    0.80
  -8  -6  10    1.40    1.20
   8   6 -10    1.80    1.00
  -7  -6   9    2.70    1.60
   7   6  -9    3.30    1.00
  -6  -6   8    2.70    1.40
   6   6  -8    3.80    1.00
  -5  -6   7    9.30    2.20
   5   6  -7    6.60    1.30
  -4  -6   6   45.90    5.20
   4   6  -6   53.29    4.40
  -3  -6   5  122.49   11.60
   3   6  -5  146.89   10.80
  -2  -6   4  151.28   12.40
   2   6  -4  139.69   11.30
  -1  -6   3  140.19   11.80
   1   6  -3  139.69   10.90
   0  -6   2  219.08   17.70
   0   6  -2  229.58   17.30
   1  -6   1    6.30    1.30
  -1   6  -1   10.50    1.20
   2  -6   0   60.79    5.50
  -2   6   0   70.79    5.30
   3  -6  -1    1.40    0.80
  -3   6   1    1.00    0.40
   4  -6  -2    5.20    1.30
  -4   6   2    7.60    0.90
   5  -6  -3   36.70    3.80
  -5   6   3   31.40    2.70
   6  -6  -4    2.40    1.10
  -6   6   4    1.40    0.40
  -7   6   5   -0.10    0.80
  -8   6   6    3.00    1.30
  -9   6   7    0.80    1.10
 -10   6   8    0.60    1.20
 -11   6   9   -0.10    1.20
 -12   6  10    1.60    1.70
 -13   6  11    2.70    1.70
 -14   6  12   -0.50    1.50
 -15   6  13    1.10    1.90
 -16   6  14   -1.20    1.50
 -15  -5  16    1.30    2.00
 -15  -5  16    2.10    3.80
 -14  -5  15    1.70    1.90
 -14  -5  15    1.70    3.50
 -13  -5  14    4.10    2.10
 -13  -5  14    9.00    4.20
 -12  -5  13    2.80    2.00
  12   5 -13    6.80    1.60
 -11  -5  12    4.50    2.00
  11   5 -12    9.70    1.70
 -10  -5  11    0.40    1.10
  10   5 -11   -0.40    0.90
  -9  -5  10    0.00    1.10
   9   5 -10    0.00    1.00
  -8  -5   9    2.40    1.30
   8   5  -9    3.00    1.00
  -7  -5   8   35.80    4.20
   7   5  -8   42.00    3.60
  -6  -5   7  139.69   11.90
   6   5  -7  142.19   11.10
  -5  -5   6    7.20    1.80
   5   5  -6    6.00    1.10
  -4  -5   5   37.80    4.20
   4   5  -5   41.30    3.50
  -3  -5   4    2.00    1.30
   3   5  -4    0.00    0.50
  -2  -5   3  254.47   19.60
   2   5  -3  235.78   18.70
  -1  -5   2   -0.10    1.40
   1   5  -2    0.20    0.50
   0  -5   1   46.00    4.00
   0   5  -1   39.50    3.50
   1  -5   0    1.20    0.70
  -1   5   0   -0.60    0.30
   2  -5  -1   83.99    6.50
  -2   5   1   75.59    6.20
   3  -5  -2   44.90    3.80
  -3   5   2   41.20    3.40
   4  -5  -3  145.49   11.40
  -4   5   3  140.89   10.90
   5  -5  -4  143.59   11.50
  -5   5   4  143.29   10.90
  -6   5   5   50.99    4.80
  -7   5   6   29.30    3.20
  -8   5   7   -1.60    0.70
  -9   5   8    4.20    1.50
 -10   5   9    3.50    1.40
 -11   5  10    1.30    1.40
 -12   5  11    0.80    1.40
 -13   5  12    4.60    2.00
 -14   5  13    9.10    2.70
 -15   5  14   -0.40    1.50
 -16   5  15    0.60    2.00
 -16  -4  16    0.60    2.00
 -15  -4  15    2.50    3.60
 -15  -4  15    0.40    1.80
 -14  -4  14    1.10    3.20
 -14  -4  14    3.30    2.20
 -13  -4  13    2.90    3.10
 -13  -4  13    7.90    2.60
 -12  -4  12   16.00    4.90
 -12  -4  12    7.90    2.50
  12   4 -12    9.70    2.30
 -11  -4  11   -0.80    1.30
  11   4 -11    3.40    1.20
 -10  -4  10    6.10    2.00
  10   4 -10    8.30    1.50
  -9  -4   9    1.00    1.20
   9   4  -9    2.30    0.90
  -8  -4   8   15.60    2.60
   8   4  -8   13.80    1.80
  -7  -4   7   24.70    3.50
   7   4  -7   27.30    2.60
  -6  -4   6   38.70    4.20
   6   4  -6   44.20    3.70
  -5  -4   5  206.98   16.60
   5   4  -5  207.78   16.00
  -4  -4   4   18.30    2.40
   4   4  -4   10.70    1.40
  -3  -4   3  440.16   33.60
   3   4  -3  430.76   33.00
  -2  -4   2 3301.87  245.88
   2   4  -2 3229.18  245.08
  -1  -4   1  388.96   32.80
   1   4  -1  458.75   32.20
   0  -4   0 1284.67   94.49
   0   4   0 1220.78   94.09
   1  -4  -1   46.20    4.30
  -1   4   1   55.39    4.10
   2  -4  -2  158.18   12.90
  -2   4   2  172.68   12.60
   3  -4  -3   98.19    8.10
  -3   4   3  103.59    7.70
   4  -4  -4   15.10    1.90
  -4   4   4   12.80    1.10
  -5   4   5   42.60    3.90
  -6   4   6   54.29    5.00
  -7   4   7   37.30    3.90
  -8   4   8    4.40    1.50
  -9   4   9    0.50    1.00
 -10   4  10    1.30    1.20
 -11   4  11   12.10    2.60
 -12   4  12   -0.80    1.30
 -13   4  13    3.20    1.80
 -14   4  14    4.70    2.30
 -15   4  15    1.20    1.60
 -16   4  16   -1.40    1.80
 -16  -3  15    3.10    2.30
 -15  -3  14   -0.30    1.50
 -14  -3  13   -0.30    3.00
 -14  -3  13    0.20    1.70
 -13  -3  12    4.40    3.50
 -13  -3  12    0.50    1.40
 -12  -3  11    1.10    2.60
 -12  -3  11   -0.70    1.00
 -11  -3  10    6.30    2.90
 -11  -3  10    2.50    1.70
  11   3 -10    2.80    1.00
 -10  -3   9    2.50    2.60
 -10  -3   9    1.20    1.20
  10   3  -9    1.80    1.00
  -9  -3   8    0.70    1.10
   9   3  -8    0.80    0.70
  -8  -3   7   28.20    3.90
   8   3  -7   31.60    2.80
  -7  -3   6   13.50    2.30
   7   3  -6    7.10    1.40
  -6  -3   5   56.99    5.30
   6   3  -5   58.89    4.80
  -5  -3   4    1.20    0.90
   5   3  -4    2.30    0.60
  -4  -3   3   92.59    7.90
   4   3  -3   96.19    7.40
  -3  -3   2  211.98   16.00
   3   3  -2  193.58   15.40
  -2  -3   1  486.25   37.20
   2   3  -1  482.75   36.60
  -1  -3   0    0.10    1.00
   1   3   0    0.00    0.30
   0  -3  -1  802.52   60.19
   0   3   1  793.02   59.99
   1  -3  -2   36.40    3.50
  -1   3   2   45.70    3.30
   2  -3  -3  514.15   39.90
  -2   3   3  538.25   39.60
   3  -3  -4  124.89   10.10
   3  -3  -4  128.79    9.70
  -3   3   4  129.89    9.70
  -5   3   6   -0.10    0.60
  -6   3   7   75.09    6.50
  -7   3   8   19.80    2.80
  -8   3   9   13.80    2.30
  -9   3  10    0.50    1.00
 -10   3  11    1.30    1.30
 -11   3  12    3.90    1.60
 -12   3  13    4.00    1.80
 -13   3  14    0.50    1.40
 -14   3  15    1.20    1.40
 -15   3  16    0.50    1.40
 -16   3  17    2.90    2.20
 -16  -2  14    2.70    2.20
 -15  -2  13    1.50    2.00
 -14  -2  12    2.10    1.90
 -13  -2  11    2.10    1.70
 -12  -2  10    0.70    1.50
 -12  -2  10    1.50    2.40
 -11  -2   9   -1.30    2.00
 -11  -2   9   -0.90    1.00
  11   2  -9    0.70    0.80
 -10  -2   8   11.20    3.30
 -10  -2   8    7.70    2.00
  10   2  -8    8.00    1.30
  -9  -2   7    9.10    2.00
  -9  -2   7    3.30    2.10
   9   2  -7    6.60    1.10
  -8  -2   6    0.40    0.80
  -8  -2   6    0.90    1.80
   8   2  -6    2.10    0.70
  -7  -2   5   -0.80    0.70
   7   2  -5    0.40    0.50
  -6  -2   4   55.29    4.90
   6   2  -4   53.99    4.40
  -5  -2   3    8.20    1.40
   5   2  -3    8.60    1.00
  -4  -2   2  156.28   12.60
   4   2  -2  162.18   12.20
  -3  -2   1  606.14   43.40
   3   2  -1  538.35   43.00
  -2  -2   0    1.90    0.90
   2   2   0    1.50    0.40
  -1  -2  -1    2.80    0.90
   1   2   1    2.40    0.40
   0  -2  -2  251.37   18.60
   0   2   2  236.88   18.40
   1  -2  -3   33.40    2.60
  -1   2   3   27.20    2.30
   2  -2  -4  559.04   39.00
   2  -2  -4  488.25   38.70
  -2   2   4  501.95   38.70
  -3   2   5  152.08   11.50
  -4   2   6    4.60    1.00
  -5   2   7   67.29    5.80
  -6   2   8   16.10    2.20
  -7   2   9   94.59    7.20
  -7   2   9   94.49    8.10
  -8   2  10    0.50    1.00
  -9   2  11    0.50    0.90
 -10   2  12   10.60    2.20
 -11   2  13   10.50    2.50
 -12   2  14    9.10    2.30
 -13   2  15    7.10    2.40
 -14   2  16    0.80    1.60
 -15   2  17    1.10    1.90
 -16   2  18    0.70    1.60
 -17  -1  14    1.30    2.10
 -16  -1  13    0.80    1.80
 -15  -1  12   -1.10    1.30
 -14  -1  11   -0.20    1.40
 -13  -1  10    1.60    1.60
 -12  -1   9    7.50    2.10
 -11  -1   8    3.60    1.60
  11   1  -8   -0.90    0.60
 -10  -1   7   37.20    4.10
  10   1  -7   35.30    3.20
  -9  -1   6   24.50    4.30
  -9  -1   6   15.00    2.50
   9   1  -6   11.70    1.50
  -8  -1   5    3.40    1.40
  -8  -1   5    2.10    2.00
   8   1  -5    3.20    0.70
  -7  -1   4    4.40    1.20
  -7  -1   4    4.40    2.20
   7   1  -4    5.10    0.80
  -6  -1   3   96.29    8.70
  -6  -1   3  100.59    8.00
   6   1  -3   92.29    7.50
  -5  -1   2   13.30    1.80
   5   1  -2   12.10    1.30
  -4  -1   1   48.10    4.50
   4   1  -1   56.59    4.20
  -3  -1   0    0.30    0.60
   3   1   0    0.10    0.30
  -2  -1  -1   23.00    2.20
   2   1   1   23.30    1.90
  -1  -1  -2   17.10    1.70
   1   1   2   15.80    1.40
   0  -1  -3  733.93   55.19
   0   1   3  733.53   55.09
  -1   1   4   31.80    2.50
  -2   1   5  112.69    9.40
  -2   1   5  127.99    9.20
  -3   1   6   86.39    6.80
  -3   1   6   82.19    6.40
  -4   1   7  144.09   11.40
   5  -1  -8   37.20    2.90
  -5   1   8   31.40    4.50
  -5   1   8   34.80    3.40
   6  -1  -9   54.59    4.20
  -6   1   9   56.59    4.90
  -6   1   9   41.10    5.50
   7  -1 -10    6.00    0.80
  -7   1  10   13.90    3.30
  -7   1  10    6.40    1.50
   8  -1 -11    1.30    0.50
  -8   1  11    3.20    1.20
  -8   1  11    0.60    1.50
  -9   1  12    1.70    1.10
 -10   1  13    0.20    1.00
 -11   1  14    0.80    1.40
 -12   1  15    3.60    1.90
 -13   1  16    2.00    1.60
 -14   1  17    1.00    1.60
 -15   1  18    1.60    1.80
 -17   0  13    0.60    2.10
 -16   0  12    1.60    1.70
 -15   0  11    1.90    1.80
 -14   0  10    6.40    2.10
 -13   0   9    3.20    1.60
 -12   0   8    1.40    1.30
 -11   0   7    5.70    1.80
 -10   0   6    1.00    1.00
  10   0  -6    1.50    0.60
  -9   0   5   10.30    1.90
   9   0  -5    9.10    1.20
  -8   0   4   12.10    2.20
   8   0  -4    9.90    1.30
  -7   0   3    1.40    0.80
   7   0  -3    1.40    0.50
  -6   0   2  211.28   16.70
   6   0  -2  215.98   16.30
  -5   0   1   43.30    3.40
   5   0  -1   32.30    2.90
  -4   0   0 1353.06   95.69
   4   0   0 1189.98   95.39
  -3   0  -1  854.41   63.39
   3   0   1  827.42   63.19
  -2   0  -2  263.67   19.40
   2   0   2  246.68   19.30
  -1   0  -3  664.43   48.90
   1   0   3  586.94   48.90
   1   0   3  699.33   48.90
   0   0  -4 3354.46  250.17
   0   0   4 3301.07  249.97
  -1   0   5   12.30    1.10
  -1   0   5   10.60    1.00
   2   0  -6  224.38   17.20
  -2   0   6  231.08   17.50
   3   0  -7    0.40    0.30
  -3   0   7    0.40    0.50
   4   0  -8   22.60    1.90
  -4   0   8   21.40    2.30
   5   0  -9   12.60    1.20
  -5   0   9   11.30    1.80
   6   0 -10    6.70    1.00
  -6   0  10    7.60    1.50
   7   0 -11   82.79    6.40
  -7   0  11   79.09    7.10
  -7   0  11   75.59    8.10
   8   0 -12   37.60    3.20
  -8   0  12   46.70    6.30
  -8   0  12   36.30    4.00
   9   0 -13   11.40    1.40
  -9   0  13   15.50    4.00
  -9   0  13   11.00    2.30
 -10   0  14    1.60    2.10
 -10   0  14    0.40    1.00
 -11   0  15    5.30    2.90
 -11   0  15    1.80    1.50
 -12   0  16   -0.10    1.30
 -13   0  17    1.60    1.60
 -14   0  18    0.50    1.50
 -15   0  19    1.00    1.90
 -17   1  12    6.90    2.60
 -16   1  11    1.30    1.80
 -15   1  10   -0.80    1.50
 -14   1   9    3.70    1.90
 -13   1   8    0.80    1.30
 -12   1   7   -1.00    1.10
 -11   1   6    0.10    1.10
 -10   1   5    2.90    1.20
  10  -1  -5    1.30    0.60
  -9   1   4   16.40    2.50
   9  -1  -4   17.70    1.70
  -8   1   3   55.49    5.20
   8  -1  -3   58.09    4.60
  -7   1   2  181.18   13.80
   7  -1  -2  168.28   13.30
  -6   1   1    6.50    1.30
   6  -1  -1    9.90    0.90
  -5   1   0   -0.10    0.50
   5  -1   0    0.30    0.30
  -4   1  -1  447.06   37.50
   4  -1   1  545.05   37.40
  -3   1  -2  178.08   13.10
   3  -1   2  163.78   13.00
  -2   1  -3   23.20    1.80
   2  -1   3   21.90    1.80
   1  -1   4   26.60    2.20
   0   1  -5   11.80    1.10
   0  -1   5   12.40    1.10
   1   1  -6  568.44   42.10
  -1  -1   6  548.95   42.20
   2   1  -7    0.60    0.40
  -2  -1   7    0.30    0.40
   3   1  -8  270.37   20.00
  -3  -1   8  255.77   20.20
   4   1  -9    8.60    1.00
  -4  -1   9    6.80    1.30
   5   1 -10   26.10    2.40
  -5  -1  10   28.10    2.90
   6   1 -11    0.70    0.80
  -6  -1  11   -0.50    0.90
   7   1 -12   12.50    1.50
  -7  -1  12   10.30    2.10
   8   1 -13   34.00    3.20
  -8  -1  13   39.20    4.00
   9   1 -14   24.10    2.50
  -9  -1  14   37.00    5.90
  -9  -1  14   21.70    3.30
 -10  -1  15    2.70    2.30
 -10  -1  15    1.10    1.20
 -11  -1  16    3.80    2.60
 -11  -1  16    4.40    1.70
 -12  -1  17   -0.20    1.20
 -12  -1  17   -1.30    1.90
 -13  -1  18    0.30    1.50
 -13  -1  18   -1.00    2.40
 -14  -1  19    0.00    1.40
 -15  -1  20   -0.70    1.40
 -17   2  11    0.80    2.00
 -16   2  10    1.60    1.80
 -15   2   9    2.40    1.90
 -14   2   8   -0.60    1.30
 -13   2   7    2.90    1.60
 -12   2   6    1.20    1.20
 -11   2   5    7.50    1.90
 -10   2   4   12.70    2.20
  10  -2  -4   12.20    1.40
  -9   2   3   12.50    2.10
   9  -2  -3   11.70    1.30
  -8   2   2    5.00    1.50
   8  -2  -2    9.80    1.00
  -7   2   1    9.80    1.60
   7  -2  -1    8.70    1.00
  -6   2   0   70.79    6.40
   6  -2   0   82.79    6.00
  -5   2  -1   13.80    1.60
   5  -2   1   14.10    1.30
  -4   2  -2 3430.06  249.88
   4  -2   2 3227.28  249.78
  -3   2  -3   49.30    4.30
   3  -2   3   64.19    4.40
  -2   2  -4  514.25   37.80
  -2   2  -4  530.95   37.80
   2  -2   4  461.65   37.90
  -1   2  -5  133.29   10.90
  -1   2  -5  136.59   10.70
   1  -2   5  154.48   10.80
   0   2  -6  217.08   17.00
   0  -2   6  229.08   17.00
   1   2  -7   12.40    1.30
  -1  -2   7   13.40    1.40
   2   2  -8   23.60    2.20
  -2  -2   8   24.80    2.30
   3   2  -9   13.80    1.60
  -3  -2   9   15.60    1.90
   4   2 -10    2.20    0.60
  -4  -2  10    1.40    0.80
   5   2 -11   13.00    1.60
  -5  -2  11   10.30    1.90
  -5  -2  11   16.20    3.20
   6   2 -12   75.19    6.10
  -6  -2  12   73.29    6.50
   7   2 -13   22.10    2.20
  -7  -2  13   20.40    2.90
   8   2 -14    0.40    0.70
  -8  -2  14    1.70    1.10
   9   2 -15    6.30    1.20
  -9  -2  15    9.10    2.10
 -10  -2  16   -0.20    1.00
 -11  -2  17    7.80    3.70
 -11  -2  17    5.80    2.10
 -12  -2  18    4.50    3.50
 -12  -2  18    5.20    2.10
 -13  -2  19    6.30    3.60
 -13  -2  19   -0.40    1.40
 -14  -2  20   -0.70    2.80
 -14  -2  20    1.70    1.80
 -15  -2  21    1.70    1.70
 -17   3  10    2.30    2.00
 -16   3   9   -0.20    1.60
 -15   3   8    1.60    1.80
 -14   3   7    3.40    1.90
 -13   3   6   -0.10    1.10
 -12   3   5    1.30    1.20
 -11   3   4    0.50    1.10
 -10   3   3   10.40    2.10
  10  -3  -3   13.50    1.40
  -9   3   2    7.80    1.70
   9  -3  -2   10.40    1.10
  -8   3   1  211.68   16.00
   8  -3  -1  195.68   15.40
  -7   3   0    0.10    0.70
   7  -3   0   -0.10    0.40
  -6   3  -1   74.19    5.80
   6  -3   1   65.99    5.50
  -5   3  -2   38.60    3.40
   5  -3   2   39.80    3.20
  -4   3  -3  436.06   33.70
   4  -3   3  456.15   33.70
  -3   3  -4  127.19   10.30
   3  -3   4  145.09   10.40
  -2   3  -5   12.60    1.60
  -2   3  -5   17.20    1.60
   2  -3   5   16.60    1.30
  -1   3  -6   28.30    2.60
  -1   3  -6   35.90    2.70
   1  -3   6   29.20    2.70
   0   3  -7   -0.20    0.40
   0  -3   7    0.70    0.50
   1   3  -8  110.09    8.80
  -1  -3   8  115.39    8.90
   2   3  -9   20.40    1.90
  -2  -3   9   19.40    2.00
   3   3 -10   53.39    4.30
  -3  -3  10   49.70    4.50
  -3  -3  10   52.39    5.80
   4   3 -11   20.30    2.10
  -4  -3  11   18.80    3.90
  -4  -3  11   21.50    2.40
   5   3 -12    0.00    0.60
  -5  -3  12   -0.30    1.90
  -5  -3  12    0.30    0.90
   6   3 -13   12.30    1.70
  -6  -3  13   12.90    2.10
   7   3 -14    4.10    1.00
  -7  -3  14    2.00    1.00
   8   3 -15    1.80    1.10
  -8  -3  15    2.30    1.30
   9   3 -16   16.50    2.00
  -9  -3  16   12.00    2.60
  10   3 -17    4.10    1.30
 -10  -3  17    4.00    1.70
 -11  -3  18    0.60    1.50
 -12  -3  19    1.60    1.70
 -12  -3  19    6.20    3.60
 -13  -3  20    5.70    3.90
 -13  -3  20   -1.50    1.40
 -14  -3  21    4.00    3.60
 -14  -3  21    0.80    1.80
 -17   4   9    1.60    2.10
 -16   4   8   -0.70    1.50
 -15   4   7   -1.10    1.40
 -14   4   6    1.60    1.50
 -13   4   5    4.70    1.80
 -12   4   4    0.20    1.20
 -11   4   3    2.10    1.30
 -10   4   2    1.90    1.10
  -9   4   1   14.00    2.20
   9  -4  -1   11.80    1.30
   8  -4   0   21.50    1.90
  -7   4  -1   52.19    4.70
   7  -4   1   52.79    4.30
  -6   4  -2   11.40    1.50
   6  -4   2   10.90    1.20
  -5   4  -3    8.00    1.20
   5  -4   3    7.90    1.00
  -4   4  -4   13.60    1.30
   4  -4   4    9.60    1.30
  -3   4  -5   44.20    3.80
   3  -4   5   47.00    3.70
  -2   4  -6    0.50    0.40
   2  -4   6    1.00    0.40
  -1   4  -7   19.40    1.80
   1  -4   7   15.70    2.00
   0   4  -8   19.20    2.10
   0  -4   8   24.30    2.30
   1   4  -9    4.30    0.90
  -1  -4   9    4.50    1.00
   2   4 -10   34.60    3.10
  -2  -4  10   34.40    3.20
   3   4 -11   93.29    7.70
  -3  -4  11   99.69    8.00
  -3  -4  11   95.89    9.60
   4   4 -12   63.59    5.50
  -4  -4  12   67.29    5.80
  -4  -4  12   63.79    7.60
   5   4 -13   71.69    5.80
  -5  -4  13   78.39    8.00
  -5  -4  13   61.19    6.10
   6   4 -14    3.20    1.00
  -6  -4  14    4.20    1.30
   7   4 -15   -0.60    0.70
  -7  -4  15    1.30    1.00
   8   4 -16    0.50    0.80
  -8  -4  16    1.40    1.20
   9   4 -17    1.00    1.00
  -9  -4  17   -1.10    1.00
  10   4 -18   -0.70    1.60
 -10  -4  18    1.40    1.50
 -11  -4  19    0.90    1.50
 -12  -4  20    1.20    1.50
 -13  -4  21    2.00    1.70
 -13  -4  21    4.20    3.20
 -14  -4  22   -1.60    1.20
 -14  -4  22    4.40    3.50
 -17   5   8   -1.00    1.70
 -16   5   7    0.60    1.70
 -15   5   6    2.60    1.80
 -14   5   5   -2.50    1.10
 -13   5   4   15.80    2.90
 -12   5   3    2.60    1.40
 -11   5   2    1.70    1.20
 -10   5   1    0.20    0.90
  -9   5   0    1.20    1.10
   9  -5   0   -0.80    0.50
  -8   5  -1 1062.79   79.89
   8  -5   1 1047.60   79.39
  -7   5  -2   83.99    7.00
   7  -5   2   86.89    6.80
  -6   5  -3   42.40    3.40
   6  -5   3   32.40    3.20
  -5   5  -4  142.19   11.50
   5  -5   4  156.38   11.50
  -4   5  -5  215.68   17.30
   4  -5   5  234.68   17.30
  -3   5  -6    0.80    0.50
   3  -5   6    0.60    0.40
  -2   5  -7   33.60    3.00
   2  -5   7   35.00    2.90
  -1   5  -8    3.60    0.90
   1  -5   8    1.90    1.00
   0   5  -9   11.70    1.50
   0  -5   9   12.20    1.90
   1   5 -10   55.39    4.80
  -1  -5  10   59.29    5.10
   2   5 -11    1.30    0.70
  -2  -5  11    1.80    0.90
  -2  -5  11    1.80    1.90
   3   5 -12  100.19    8.70
  -3  -5  12  105.09    9.00
  -3  -5  12  135.29   11.60
   4   5 -13  125.89   10.10
  -4  -5  13  132.99   10.50
  -4  -5  13  118.79   12.30
   5   5 -14    1.30    0.90
  -5  -5  14    4.80    1.40
   6   5 -15   10.80    1.70
  -6  -5  15   11.50    2.30
   7   5 -16   21.50    2.60
  -7  -5  16   19.70    3.20
   8   5 -17    5.60    1.40
  -8  -5  17    5.00    1.80
   9   5 -18    4.30    1.50
  -9  -5  18    8.40    2.20
  10   5 -19   -1.30    1.10
 -10  -5  19   -0.50    1.30
 -11  -5  20    1.30    1.60
 -12  -5  21    1.60    1.80
 -13  -5  22   -1.10    1.70
 -17   6   7    0.40    1.90
 -16   6   6   -0.30    1.50
 -15   6   5   -1.10    1.40
 -14   6   4    0.90    1.50
 -13   6   3    5.20    1.90
 -12   6   2    1.90    1.30
 -11   6   1    1.30    1.20
 -10   6   0   27.50    3.20
  -9   6  -1   15.20    2.10
   9  -6   1    9.90    1.40
  -8   6  -2  490.05   40.40
   8  -6   2  568.04   40.10
  -7   6  -3    0.50    0.70
   7  -6   3    0.60    0.60
  -6   6  -4    1.30    0.70
   6  -6   4    1.60    0.70
  -4   6  -6   39.70    3.30
   4  -6   6   34.60    3.10
  -3   6  -7   40.30    3.60
   3  -6   7   41.30    3.40
  -2   6  -8    2.50    0.80
   2  -6   8    2.40    0.70
  -1   6  -9    4.30    1.00
   1  -6   9    3.70    1.30
   0   6 -10    3.30    0.90
   0  -6  10    4.60    1.50
   1   6 -11    4.10    1.40
  -1  -6  11    4.90    1.60
  -1  -6  11    6.80    3.30
   2   6 -12    0.60    0.70
  -2  -6  12    0.00    0.90
  -2  -6  12    1.70    2.20
   3   6 -13    0.20    0.70
  -3  -6  13    0.60    0.90
  -3  -6  13    1.40    1.90
   4   6 -14    0.80    0.80
  -4  -6  14    1.40    2.20
  -4  -6  14    1.10    0.90
   5   6 -15   27.30    2.90
  -5  -6  15   28.90    3.40
   6   6 -16    7.60    1.50
  -6  -6  16    2.70    1.50
   7   6 -17   -0.40    0.90
  -7  -6  17   -1.10    0.90
   8   6 -18    0.50    1.00
  -8  -6  18   -0.80    1.10
   9   6 -19    5.60    1.60
  -9  -6  19    4.70    2.10
  10   6 -20   -1.20    1.10
 -10  -6  20    1.20    1.70
 -11  -6  21    0.80    1.60
 -12  -6  22    0.30    1.90
 -13  -6  23   -0.20    1.80
 -16   7   5   -2.30    1.30
 -15   7   4   -2.10    1.30
 -14   7   3    8.20    2.30
 -13   7   2    4.60    1.90
 -12   7   1   22.70    3.30
 -11   7   0    1.00    1.10
 -10   7  -1   14.50    2.30
  -9   7  -2   -0.60    0.80
   9  -7   2    0.90    0.70
  -8   7  -3    0.80    0.80
   8  -7   3    2.60    0.70
  -7   7  -4    0.50    0.70
   7  -7   4    0.20    0.60
  -6   7  -5    0.70    0.60
   6  -7   5    1.30    0.70
  -5   7  -6   24.30    2.40
   5  -7   6   22.40    2.30
  -4   7  -7   22.60    2.20
   4  -7   7   20.50    2.00
  -3   7  -8    1.40    0.70
   3  -7   8    1.70    0.60
  -2   7  -9   28.90    3.00
   2  -7   9   34.00    3.00
  -1   7 -10   60.59    5.20
   1  -7  10   61.19    5.50
   0   7 -11   78.49    6.60
   0  -7  11   86.89    9.10
   0  -7  11   73.79    7.10
   1   7 -12   75.59    6.30
  -1  -7  12   77.69    8.80
  -1  -7  12   72.19    6.90
   2   7 -13    1.50    0.90
  -2  -7  13    0.80    1.20
  -2  -7  13    5.10    3.00
   3   7 -14   40.20    3.80
  -3  -7  14   41.40    4.30
  -3  -7  14   35.50    6.80
   4   7 -15   19.30    2.50
  -4  -7  15   20.40    3.10
   5   7 -16   12.20    2.00
  -5  -7  16   11.60    2.40
   6   7 -17    3.20    1.20
  -6  -7  17    2.10    1.30
   7   7 -18    1.40    1.20
  -7  -7  18   -0.70    1.10
   8   7 -19    4.90    1.70
  -8  -7  19    2.20    1.80
   9   7 -20    0.50    1.20
  -9  -7  20    0.70    1.50
  10   7 -21    4.80    1.80
 -10  -7  21    1.60    1.70
 -11  -7  22    1.00    1.80
 -12  -7  23   -0.90    1.60
 -13   8   1   -0.10    2.10
 -12   8   0  248.88   20.00
 -11   8  -1   29.80    3.50
 -10   8  -2    3.20    1.30
  -9   8  -3    5.20    1.30
   9  -8   3    4.30    1.30
  -8   8  -4    0.10    0.80
   8  -8   4    0.60    0.80
  -7   8  -5   -0.10    0.60
   7  -8   5    0.00    0.70
  -5   8  -7   14.10    1.90
   5  -8   7   15.00    1.70
  -4   8  -8   18.10    2.10
   4  -8   8   15.10    1.70
  -3   8  -9   -0.50    0.60
   3  -8   9    0.90    0.60
  -2   8 -10   38.00    3.60
   2  -8  10   38.50    3.50
  -1   8 -11  116.09    8.70
   1  -8  11   87.09   10.70
   1  -8  11  107.09    8.90
   0   8 -12   39.00    3.60
   0  -8  12   48.30    7.80
   0  -8  12   27.70    4.30
   1   8 -13   12.30    1.80
  -1  -8  13    9.20    3.60
  -1  -8  13    7.00    2.20
   2   8 -14    1.70    1.00
  -2  -8  14    1.60    1.40
  -2  -8  14    1.30    2.40
   3   8 -15   15.20    2.30
  -3  -8  15   18.00    5.20
  -3  -8  15   18.20    3.20
   4   8 -16    0.00    0.90
  -4  -8  16   -0.20    1.20
   5   8 -17    6.40    1.60
  -5  -8  17    8.50    2.40
   6   8 -18    2.80    1.40
  -6  -8  18    1.20    1.40
   7   8 -19    1.20    1.50
  -7  -8  19    1.50    1.60
   8   8 -20   -1.50    1.10
  -8  -8  20   -1.70    1.30
   9   8 -21    1.20    1.40
  -9  -8  21   -0.80    1.40
  10   8 -22    2.10    1.50
 -10  -8  22    0.00    1.60
  11   8 -23    1.30    1.70
 -11  -8  23   -0.80    1.80
   8  -9   5    1.20    0.80
   7  -9   6    0.80    0.80
  -6   9  -7    2.60    1.10
  -5   9  -8   25.20    2.80
   5  -9   8   24.90    3.20
  -4   9  -9    0.30    0.80
   4  -9   9   -0.70    2.10
   4  -9   9    1.60    0.70
  -3   9 -10   58.69    5.10
   3  -9  10   44.50    8.20
   3  -9  10   60.49    4.90
  -2   9 -11   46.70    4.20
   2  -9  11   46.20    4.10
   2  -9  11   37.10    7.60
  -1   9 -12   12.70    2.00
   1  -9  12   14.80    4.80
   1  -9  12   13.40    2.20
   0   9 -13   13.20    2.00
   0  -9  13    8.80    2.60
   0  -9  13   13.70    4.70
   1   9 -14    1.50    1.20
  -1  -9  14    0.70    1.90
  -1  -9  14    4.50    3.50
   2   9 -15   11.90    2.00
  -2  -9  15    6.10    3.50
  -2  -9  15   11.60    2.70
   3   9 -16    6.50    1.50
  -3  -9  16    4.50    2.10
   4   9 -17    8.40    1.80
  -4  -9  17    2.80    1.90
   5   9 -18    1.20    1.30
  -5  -9  18    0.50    1.60
   6   9 -19    1.20    1.40
  -6  -9  19    3.00    2.00
   7   9 -20   -1.20    1.20
  -7  -9  20   -1.10    1.40
   8   9 -21    0.80    1.60
  -8  -9  21    2.20    2.00
   9   9 -22   -1.40    1.40
  -9  -9  22   -0.90    1.70
  10   9 -23    1.20    1.80
 -10  -9  23   -0.40    1.90
 -11  -9  24    3.40    2.40
   8 -10   6   -0.70    2.50
   8 -10   6    0.80    0.90
   7 -10   7    6.20    1.30
   7 -10   7    2.00    2.70
  -6  10  -8    1.80    1.10
   6 -10   8    3.30    3.00
  -5  10  -9    1.70    1.00
   5 -10   9    0.10    2.40
  -4  10 -10    9.90    1.70
   4 -10  10    6.80    3.60
  -3  10 -11    6.90    1.60
   3 -10  11   10.10    4.50
  -2  10 -12    1.70    1.10
   2 -10  12    0.40    2.20
  -1  10 -13    0.00    0.90
   1 -10  13   -0.20    2.60
   0  10 -14    0.70    1.10
   0 -10  14    1.80    2.50
   1  10 -15    0.80    1.10
  -1 -10  15   -3.70    1.80
  -1 -10  15   -1.10    2.60
   2  10 -16   -0.70    1.20
  -2 -10  16   -1.90    1.80
   3  10 -17    0.90    1.30
  -3 -10  17   -0.80    1.80
   4  10 -18    1.40    2.10
  -4 -10  18    4.20    2.30
   5  10 -19   -1.40    1.20
  -5 -10  19   -1.20    1.60
   6  10 -20    0.20    1.50
  -6 -10  20   -1.70    1.50
   7  10 -21   -0.40    1.70
  -7 -10  21   -1.30    1.70
   8  10 -22    1.80    1.90
  -8 -10  22   -0.80    1.90
   9  10 -23   -1.80    1.70
  -9 -10  23   -1.40    1.90
 -10 -10  24   -3.40    1.80
   8 -11   7    1.10    3.60
   8 -11   7   -2.80    1.00
   7 -11   8    0.70    2.90
  -6  11  -9    0.20    1.00
   6 -11   9   -1.80    2.40
  -5  11 -10    0.10    1.00
   5 -11  10    1.80    2.60
  -4  11 -11    0.10    1.00
   4 -11  11    2.10    2.90
  -3  11 -12   -0.40    0.90
   3 -11  12    3.70    3.60
  -2  11 -13    1.20    1.10
   2 -11  13    0.20    2.70
  -1  11 -14    1.60    1.30
   1 -11  14    1.50    2.80
   0  11 -15    4.70    1.70
   0 -11  15    0.40    2.70
   1  11 -16   14.50    2.50
   2  11 -17    2.40    2.20
   3  11 -18    0.10    1.50
   4  11 -19    0.10    1.30
   5  11 -20    0.70    1.60
   6  11 -21   -0.20    1.70
   7  11 -22    2.40    1.80
   8  11 -23    1.20    2.00
   8 -12   8   -0.60    1.70
   7 -12   9    2.00    3.30
  -6  12 -10   10.50    2.10
   6 -12  10    6.60    4.90
  -5  12 -11    5.60    2.00
   5 -12  11    0.10    3.70
  -4  12 -12   13.60    2.60
   4 -12  12   10.00    4.80
  -3  12 -13    4.20    2.00
   3 -12  13    1.20    3.00
  -2  12 -14   -1.40    1.90
   2 -12  14   -0.20    3.30
  -1  12 -15    0.50    1.80
   0  12 -16   -0.60    1.50
   1  12 -17    0.40    1.40
   2  12 -18    0.80    1.40
   3  12 -19    0.10    1.60
   4  12 -20    2.60    2.10
   5  12 -21    0.60    1.80
   6  12 -22   -1.50    1.70
   7  12 -23   -1.20    2.20
  -6  13 -11   -0.20    1.30
   6 -13  11    0.90    3.50
  -5  13 -12    0.10    1.20
   5 -13  12   -1.70    3.10
  -4  13 -13    5.10    1.80
  -3  13 -14    0.00    1.40
  -2  13 -15    0.30    1.40
  -1  13 -16    0.70    1.60
   0  13 -17    2.40    1.80
   1  13 -18    2.50    1.80
   2  13 -19    3.20    2.10
   3  13 -20    0.70    1.60
   4  13 -21   -0.10    1.70
   5  13 -22    0.80    1.90
   6  13 -23   -1.60    1.90
  -6  14 -12    2.50    1.70
  -5  14 -13   -0.10    1.70
  -4  14 -14   -3.10    1.50
  -3  14 -15    1.50    1.80
  -2  14 -16    2.60    2.00
  -1  14 -17    6.90    2.20
   0  14 -18    1.50    1.60
   1  14 -19    2.30    1.80
   2  14 -20   -0.40    1.60
   3  14 -21    1.60    2.10
   4  14 -22    3.40    2.50
  -6  15 -13   -1.30    1.50
  -5  15 -14   -0.70    1.50
  -4  15 -15    0.60    1.70
  -3  15 -16    2.50    1.90
  -2  15 -17    1.80    1.90
  -1  15 -18    1.50    1.90
   0  15 -19   -0.40    1.80
   1  15 -20    5.00    2.60
   2  15 -21   -2.30    2.10
  -6  16 -14   -1.40    1.80
  -5  16 -15    2.40    2.10
  -4  16 -16   -2.00    2.00
  -3  16 -17    0.70    1.90
  -2  16 -18   -1.20    1.80
   2  17 -13    0.60    2.20
   1  17 -12    9.40    2.80
   0  17 -11   -1.10    2.00
  -1  17 -10   -0.60    1.90
  -2  17  -9   -0.40    1.80
  -3  17  -8   -0.70    1.60
  -4  17  -7    1.60    1.90
   5  16 -15    1.10    2.00
   4  16 -14    4.90    2.60
   3  16 -13    2.50    1.90
   2  16 -12    1.50    1.70
   1  16 -11    5.80    2.20
   0  16 -10    1.30    1.80
  -1  16  -9    0.50    1.80
  -2  16  -8   -0.30    1.50
  -3  16  -7    1.30    1.70
  -4  16  -6   -0.80    1.50
   7  15 -16   -2.90    1.90
   6  15 -15    1.30    2.00
   5  15 -14   -0.20    2.00
   4  15 -13    3.20    2.00
   3  15 -12   -0.50    1.70
   2  15 -11    2.40    2.00
   1  15 -10   -1.20    1.60
   0  15  -9    0.50    1.60
  -1  15  -8   -1.50    1.30
  -2  15  -7    1.40    1.50
  -3  15  -6   -2.00    1.20
  -4  15  -5   -2.50    1.10
  -8 -14  16   -7.10    3.10
   8  14 -16   -2.80    2.30
  -7 -14  15   -6.00    3.40
   7  14 -15    0.50    1.70
  -6 -14  14    2.80    3.80
   6  14 -14   -2.30    1.60
  -5 -14  13   -1.10    3.60
   5  14 -13   12.60    2.70
  -4 -14  12   -1.10    3.90
   4  14 -12    3.70    1.80
  -3 -14  11   -2.20    2.90
   3  14 -11    1.00    1.50
  -2 -14  10    5.80    3.10
   2  14 -10   12.00    2.40
  -1 -14   9    0.80    2.40
   1  14  -9    1.50    1.50
   0  14  -8   -1.70    1.20
  -1  14  -7    0.60    1.30
  -2  14  -6    1.30    1.40
  -3  14  -5    0.40    1.30
  -4  14  -4   -0.90    1.10
  -5  14  -3    1.40    1.20
 -10 -13  17   -1.70    3.60
  -9 -13  16   -0.70    3.10
   9  13 -16    1.40    1.90
  -8 -13  15   -2.80    3.30
   8  13 -15    1.10    1.80
  -7 -13  14   -3.30    3.40
   7  13 -14    0.30    1.90
  -6 -13  13    1.00    3.30
   6  13 -13    1.50    1.70
  -5 -13  12    0.60    3.40
   5  13 -12    4.00    1.80
  -4 -13  11   -0.40    3.20
   4  13 -11   -0.90    1.30
  -3 -13  10    8.30    4.60
   3  13 -10    3.90    1.80
  -2 -13   9    1.50    2.50
   2  13  -9    2.80    1.90
  -1 -13   8    5.10    2.30
   1  13  -8    2.60    1.60
   0 -13   7    3.90    1.90
   0  13  -7    0.60    1.10
   1 -13   6   -0.80    1.30
  -1  13  -6    1.50    1.20
   2 -13   5    0.60    1.20
  -2  13  -5    0.10    1.10
   3 -13   4    1.30    1.40
  -3  13  -4   -0.30    1.00
   4 -13   3    1.80    1.30
  -4  13  -3   -1.20    0.90
   5 -13   2   -1.40    1.70
  -5  13  -2    2.10    1.40
   6 -13   1    8.30    3.50
 -11 -12  17   -2.30    2.90
  11  12 -17   -1.20    1.90
 -10 -12  16    0.20    2.80
  10  12 -16   -1.50    1.70
  -9 -12  15    1.00    3.10
   9  12 -15    2.20    1.80
  -8 -12  14   -4.60    2.30
   8  12 -14    0.50    1.70
  -7 -12  13    3.60    3.50
   7  12 -13    3.80    1.90
  -6 -12  12    4.20    3.60
   6  12 -12    8.50    2.10
  -5 -12  11    8.20    4.00
   5  12 -11    1.30    2.00
  -4 -12  10    0.80    3.10
   4  12 -10    0.10    1.20
  -3 -12   9    3.20    3.10
   3  12  -9    0.60    1.20
  -2 -12   8    2.40    2.40
   2  12  -8    1.10    1.20
  -1 -12   7   -0.10    1.80
   1  12  -7   -1.40    0.90
   0 -12   6    6.10    1.90
   0  12  -6    1.30    1.10
   1 -12   5   22.20    3.20
  -1  12  -5   19.40    2.70
   2 -12   4    2.50    1.30
  -2  12  -4   -0.30    0.90
   3 -12   3    8.60    2.00
  -3  12  -3    9.90    1.70
   4 -12   2    5.70    1.60
  -4  12  -2    5.60    1.40
   5 -12   1    0.70    1.10
  -5  12  -1    0.10    0.90
   6 -12   0    8.20    2.00
   7 -12  -1   -1.40    1.90
   8 -12  -2    9.00    2.40
 -10  12   4    2.40    1.50
 -11  12   5   -1.10    1.50
 -12 -11  17    1.70    2.50
  12  11 -17   -0.60    1.80
 -11 -11  16    3.30    3.00
  11  11 -16    0.70    1.80
 -10 -11  15   -3.10    2.10
  10  11 -15    0.80    1.70
  -9 -11  14   -0.60    2.40
   9  11 -14   -1.00    1.50
  -8 -11  13    1.80    2.60
   8  11 -13    5.00    1.80
  -7 -11  12    1.60    2.90
   7  11 -12    2.60    1.70
  -6 -11  11    2.40    3.00
   6  11 -11   10.30    2.10
  -5 -11  10   -3.70    2.20
   5  11 -10    1.10    1.20
  -4 -11   9    1.90    2.70
   4  11  -9   -0.30    1.00
  -3 -11   8    0.40    2.50
   3  11  -8   -1.00    0.80
  -2 -11   7    1.40    2.50
   2  11  -7    0.70    1.00
  -1 -11   6    0.10    1.80
   1  11  -6    2.00    1.20
   0 -11   5    1.00    1.40
   0  11  -5   -0.80    0.80
   1 -11   4   12.50    2.40
  -1  11  -4   15.90    2.10
   2 -11   3    1.70    1.20
  -2  11  -3   -0.30    0.80
   3 -11   2    9.60    2.00
  -3  11  -2    6.90    1.60
   4 -11   1    0.10    1.00
  -4  11  -1   -1.10    0.70
   5 -11   0   -1.10    0.90
  -5  11   0    0.20    0.70
   6 -11  -1   -0.50    1.00
  -6  11   1    0.50    0.80
   7 -11  -2    0.30    1.30
   8 -11  -3    9.10    2.40
  -9  11   4   19.60    3.30
 -10  11   5    1.20    1.50
 -11  11   6    3.10    1.90
 -12  11   7    0.40    1.50
 -13  11   8   -0.60    1.50
 -14  11   9   -0.70    1.70
 -13 -10  17   -0.90    2.90
 -12 -10  16   -2.30    2.10
  12  10 -16   -1.50    1.60
 -11 -10  15    0.30    2.50
  11  10 -15   -0.70    1.40
 -10 -10  14    2.50    2.20
  10  10 -14    1.90    1.60
  -9 -10  13    6.40    2.90
   9  10 -13    7.10    2.00
  -8 -10  12   11.00    3.70
   8  10 -12    8.60    2.30
  -7 -10  11    2.60    2.40
   7  10 -11    0.10    1.20
  -6 -10  10    3.10    2.60
   6  10 -10    2.00    1.30
  -5 -10   9    2.00    2.50
   5  10  -9    1.80    1.10
  -4 -10   8    8.20    3.40
   4  10  -8    5.50    1.50
  -3 -10   7    3.20    2.60
   3  10  -7    3.90    1.20
  -2 -10   6    3.10    2.50
   2  10  -6    6.00    1.40
  -1 -10   5    5.20    2.10
   1  10  -5    0.20    0.80
   0 -10   4    2.60    1.50
   0  10  -4    2.20    1.00
   1 -10   3   13.80    2.40
  -1  10  -3   14.70    2.00
   2 -10   2   27.00    3.10
  -2  10  -2   23.70    2.80
   3 -10   1   24.70    3.10
  -3  10  -1   21.00    2.50
   4 -10   0   62.79    5.50
  -4  10   0   54.59    5.00
   5 -10  -1    0.30    1.00
  -5  10   1   -0.70    0.60
   6 -10  -2   -1.20    0.90
  -6  10   2    0.60    0.70
   7 -10  -3   -0.20    1.10
   8 -10  -4    1.60    1.50
  -9  10   5   16.30    2.90
 -10  10   6   -0.90    1.40
 -11  10   7   -0.30    1.60
 -12  10   8   -0.50    1.40
 -13  10   9    0.70    1.60
 -14  10  10   -1.30    1.50
 -13  -9  16   -2.30    1.80
  13   9 -16   -1.50    1.40
 -12  -9  15    0.90    2.30
  12   9 -15   -1.50    1.40
 -11  -9  14   -0.60    1.90
  11   9 -14   -2.40    1.10
 -10  -9  13   -1.70    1.80
  10   9 -13   -0.40    1.30
  -9  -9  12    1.50    2.20
   9   9 -12    4.30    2.20
  -8  -9  11    1.50    2.20
   8   9 -11    1.20    1.20
  -7  -9  10    2.00    2.00
   7   9 -10    6.30    1.50
  -6  -9   9    1.70    2.10
   6   9  -9   -1.50    0.80
  -5  -9   8    5.70    2.50
   5   9  -8    5.90    1.40
  -4  -9   7    0.50    2.10
   4   9  -7    1.50    1.00
  -3  -9   6   17.70    3.80
   3   9  -6   13.90    2.00
  -2  -9   5   -0.70    2.00
   2   9  -5    1.50    0.80
  -1  -9   4   18.00    3.20
   1   9  -4   14.30    2.00
   0  -9   3    0.40    1.20
   0   9  -3    2.40    0.90
   1  -9   2    1.50    1.10
  -1   9  -2   -0.10    0.60
   2  -9   1    4.00    1.30
  -2   9  -1    7.50    1.30
   3  -9   0    0.80    0.90
  -3   9   0    1.00    0.70
   4  -9  -1    0.90    0.90
  -4   9   1   -0.10    0.50
   5  -9  -2   20.70    2.80
  -5   9   2   17.50    2.00
   6  -9  -3    5.00    1.60
  -6   9   3    6.30    1.00
   7  -9  -4    2.00    1.50
  -9   9   6    0.70    1.30
 -10   9   7    3.20    1.90
 -11   9   8   -0.50    1.40
 -12   9   9    0.30    1.50
 -13   9  10    1.70    1.70
 -14   9  11    0.30    1.70
 -15   9  12   -0.70    1.70
 -14  -8  16   -1.70    2.10
 -13  -8  15    2.40    2.50
  13   8 -15    2.70    1.70
 -12  -8  14    7.70    3.10
  12   8 -14    8.10    2.20
 -11  -8  13   -0.50    1.90
  11   8 -13   -0.90    1.20
 -10  -8  12   21.40    4.20
  10   8 -12   22.80    3.30
  -9  -8  11    0.20    1.60
   9   8 -11    0.10    1.00
  -8  -8  10    1.10    1.70
   8   8 -10    0.10    1.00
  -7  -8   9    0.50    1.70
   7   8  -9    2.60    1.20
  -6  -8   8   -1.70    1.40
   6   8  -8   -0.60    0.70
  -5  -8   7   -0.10    1.60
   5   8  -7   -0.10    0.80
  -4  -8   6   -2.10    1.50
   4   8  -6   -0.80    0.60
  -3  -8   5    6.30    2.70
   3   8  -5    4.80    1.10
  -2  -8   4   17.30    3.80
   2   8  -4   15.00    2.00
  -1  -8   3   59.39    6.80
   1   8  -3   63.89    5.40
   0  -8   2    2.30    1.70
   0   8  -2    1.60    1.10
   1  -8   1   22.80    3.30
  -1   8  -1   22.70    2.60
   2  -8   0   -0.30    1.40
  -2   8   0   -0.40    0.90
   3  -8  -1    0.70    0.90
  -3   8   1    0.20    0.60
   4  -8  -2   15.00    2.20
  -4   8   2   14.00    1.70
   5  -8  -3    4.70    1.40
  -5   8   3    7.40    1.00
   6  -8  -4    4.60    1.50
  -6   8   4    5.40    0.80
   7  -8  -5   -0.10    1.00
  -8   8   6    8.30    2.00
  -9   8   7    8.10    2.10
 -10   8   8    1.20    1.40
 -11   8   9   -0.60    1.40
 -12   8  10    0.70    1.50
 -13   8  11    1.90    1.80
 -14   8  12    0.30    1.80
 -15   8  13    1.90    2.00
 -15  -7  16   -0.10    2.10
 -15  -7  16   -1.80    3.50
 -14  -7  15    1.60    2.10
 -14  -7  15   -0.10    3.60
 -13  -7  14   -2.50    1.20
  13   7 -14   -1.40    1.70
 -12  -7  13    7.20    2.70
  12   7 -13   14.50    2.40
 -11  -7  12   -1.80    1.70
  11   7 -12    1.90    1.40
 -10  -7  11    0.60    1.70
  10   7 -11    1.70    1.20
  -9  -7  10   -0.50    1.30
   9   7 -10   -1.20    0.80
  -8  -7   9    4.60    2.00
   8   7  -9    4.90    1.40
  -7  -7   8    5.30    2.00
   7   7  -8    3.70    1.20
  -6  -7   7    4.00    1.80
   6   7  -7    9.90    1.60
  -5  -7   6   26.90    4.20
   5   7  -6   27.60    2.80
  -4  -7   5    1.90    2.10
   4   7  -5    1.80    0.90
  -3  -7   4  155.18   13.80
   3   7  -4  160.78   12.50
  -2  -7   3   23.30    3.80
   2   7  -3   20.40    2.20
  -1  -7   2  180.68   14.40
   1   7  -2  167.18   13.50
   0  -7   1   25.70    3.00
   0   7  -1   24.10    2.40
   1  -7   0    0.60    0.90
  -1   7   0    0.30    0.50
   2  -7  -1    0.00    0.70
  -2   7   1    0.60    0.50
   3  -7  -2   36.80    3.50
  -3   7   2   34.20    3.00
   4  -7  -3   34.70    3.90
  -4   7   3   36.40    3.10
   5  -7  -4   23.10    2.80
  -5   7   4   23.30    2.10
   6  -7  -5    1.50    1.10
  -6   7   5   -0.40    0.30
  -8   7   7    5.30    1.70
  -9   7   8    4.50    1.60
 -10   7   9   -1.10    1.10
 -11   7  10    1.10    1.50
 -12   7  11   -0.10    1.30
 -13   7  12    0.00    1.60
 -14   7  13   -0.90    1.60
 -15   7  14   -0.90    1.60
 -15  -6  15    0.30    1.70
 -15  -6  15   -2.50    3.20
 -14  -6  14   -0.20    1.90
 -14  -6  14    3.60    3.70
 -13  -6  13    1.90    1.90
 -12  -6  12    1.20    1.60
  12   6 -12    0.40    1.30
 -11  -6  11    0.10    1.30
  11   6 -11   -2.30    0.90
 -10  -6  10    1.90    1.60
  10   6 -10    0.50    0.90
  -9  -6   9   -0.10    1.50
   9   6  -9    2.00    1.00
  -8  -6   8    3.70    1.90
   8   6  -8    2.30    0.90
  -7  -6   7    0.60    1.20
   7   6  -7    2.00    0.90
  -6  -6   6    8.00    2.40
   6   6  -6    8.80    1.50
  -5  -6   5   49.10    5.50
   5   6  -5   48.70    4.40
  -4  -6   4    1.10    1.60
   4   6  -4    2.80    0.80
  -3  -6   3    5.20    2.20
   3   6  -3   10.20    1.40
  -2  -6   2   13.60    3.10
   2   6  -2   19.70    1.90
  -1  -6   1    4.60    1.80
   1   6  -1   11.80    1.40
   0  -6   0   21.50    2.60
   0   6   0   15.50    1.80
   1  -6  -1    5.30    1.20
  -1   6   1    7.60    1.00
   2  -6  -2    8.30    1.40
  -2   6   2    7.60    1.00
   3  -6  -3    1.90    0.90
  -3   6   3    0.10    0.40
   4  -6  -4   10.30    1.80
  -4   6   4    8.90    1.00
   5  -6  -5   27.70    3.60
  -5   6   5   29.50    2.40
   6  -6  -6    6.00    1.60
  -6   6   6    7.70    0.80
  -7   6   7    7.30    1.70
  -8   6   8   -0.30    0.80
  -9   6   9   -0.40    1.10
 -10   6  10    5.70    1.80
 -11   6  11   11.20    2.60
 -12   6  12    8.20    2.40
 -13   6  13    0.50    1.50
 -14   6  14    1.70    1.80
 -15   6  15    0.70    1.80
 -16  -5  15    4.90    2.80
 -16  -5  15    1.10    3.90
 -15  -5  14   -0.60    1.60
 -15  -5  14    5.50    4.20
 -14  -5  13   -0.40    3.10
 -14  -5  13   -0.70    1.60
 -13  -5  12   -0.60    1.30
 -13  -5  12   -1.50    2.50
 -12  -5  11    1.10    3.30
 -12  -5  11    3.60    2.00
  12   5 -11   -0.20    1.60
 -11  -5  10    2.50    1.80
  11   5 -10    0.70    1.10
 -10  -5   9    1.20    1.30
  10   5  -9    1.80    1.10
  -9  -5   8   20.40    3.50
   9   5  -8   23.40    2.60
  -8  -5   7   12.00    2.40
   8   5  -7   14.90    1.90
  -7  -5   6   17.90    3.00
   7   5  -6   21.80    2.30
  -6  -5   5   28.20    3.90
   6   5  -5   23.00    2.70
  -5  -5   4  137.19   11.60
   5   5  -4  134.99   10.70
  -4  -5   3   10.20    2.20
   4   5  -3    4.90    0.90
  -3  -5   2   43.30    4.40
   3   5  -2   36.50    3.30
  -2  -5   1   17.60    3.00
   2   5  -1   14.50    1.70
  -1  -5   0   -0.90    1.20
   1   5   0   -0.40    0.40
   0  -5  -1   43.70    3.90
   0   5   1   38.40    3.30
   1  -5  -2   12.50    1.70
  -1   5   2   10.10    1.20
   2  -5  -3   13.70    1.80
  -2   5   3   10.70    1.20
   3  -5  -4    4.50    1.10
  -3   5   4    2.50    0.50
   4  -5  -5  238.88   18.10
  -4   5   5  225.88   17.50
   5  -5  -6    9.30    1.70
  -5   5   6    9.00    0.80
  -6   5   7    6.50    1.50
  -7   5   8    1.00    1.00
  -8   5   9   19.70    3.00
  -9   5  10   12.20    2.30
 -10   5  11   -0.10    1.00
 -11   5  12    0.80    1.40
 -12   5  13   -0.40    1.30
 -13   5  14    0.30    1.50
 -14   5  15   -0.20    1.70
 -15   5  16    1.60    1.80
 -16  -4  14    1.10    2.10
 -15  -4  13    1.80    1.90
 -14  -4  12   -1.60    2.70
 -14  -4  12    0.10    1.60
 -13  -4  11   -0.70    2.80
 -13  -4  11   -1.00    1.20
 -12  -4  10    3.70    2.00
 -12  -4  10    5.10    3.30
  12   4 -10    2.20    1.30
 -11  -4   9    0.30    1.40
 -11  -4   9    0.40    2.50
  11   4  -9    0.40    0.90
 -10  -4   8    0.70    1.30
  10   4  -8   -0.40    0.90
  -9  -4   7    0.10    1.00
   9   4  -7    1.10    0.80
  -8  -4   6   50.89    5.00
   8   4  -6   46.30    4.20
  -7  -4   5   37.50    3.90
   7   4  -5   31.10    3.00
  -6  -4   4    9.90    2.00
   6   4  -4    7.80    1.20
  -5  -4   3  138.79   11.70
   5   4  -3  142.69   11.00
  -4  -4   2  183.98   15.80
   4   4  -2  205.68   15.10
  -3  -4   1 9459.15  716.83
   3   4  -1 9632.94  717.03
  -2  -4   0 2761.62  205.38
   2   4   0 2689.23  204.58
  -1  -4  -1  416.06   33.90
   1   4   1  463.35   33.40
   0  -4  -2   99.99    7.70
   0   4   2   89.69    7.30
   1  -4  -3  380.46   29.80
  -1   4   3  400.46   29.50
   2  -4  -4   37.10    3.70
  -2   4   4   46.40    3.40
   3  -4  -5   46.70    4.30
  -3   4   5   50.09    3.80
   4  -4  -6    5.30    1.30
  -4   4   6    5.80    0.60
  -6   4   8   29.20    3.30
  -7   4   9   -0.80    0.70
  -8   4  10    9.40    2.00
  -9   4  11    2.70    1.30
 -10   4  12   38.30    4.40
 -11   4  13    0.80    1.50
 -12   4  14   -0.70    1.20
 -13   4  15    0.40    1.40
 -14   4  16    0.40    1.60
 -15   4  17   -0.10    1.60
 -16  -3  13    1.70    2.20
 -15  -3  12    3.10    2.00
 -14  -3  11    1.20    1.60
 -13  -3  10    0.50    3.40
 -13  -3  10   -0.80    1.60
 -12  -3   9    0.40    1.90
 -12  -3   9    1.40    1.50
  12   3  -9    2.50    1.10
 -11  -3   8    4.90    3.00
 -11  -3   8    4.40    1.60
  11   3  -8    3.90    1.10
 -10  -3   7   -1.50    0.90
 -10  -3   7    2.80    2.20
  10   3  -7   -0.90    0.70
  -9  -3   6   24.80    4.80
  -9  -3   6   31.70    3.60
   9   3  -6   28.80    2.80
  -8  -3   5    0.20    1.10
   8   3  -5    0.10    0.60
  -7  -3   4   23.70    2.80
   7   3  -4   23.40    2.30
  -6  -3   3   -0.80    0.60
   6   3  -3    0.50    0.50
  -5  -3   2   43.10    3.80
   5   3  -2   33.70    3.10
  -4  -3   1  146.89   12.20
   4   3  -1  151.98   11.60
  -3  -3   0   -0.30    1.10
   3   3   0   -0.20    0.40
  -2  -3  -1  485.45   38.00
   2   3   1  501.05   37.30
  -1  -3  -2  173.98   13.00
   1   3   2  156.38   12.50
   0  -3  -3   60.79    5.10
   0   3   3   63.69    4.90
  -1   3   4   24.20    2.00
   2  -3  -5   19.60    2.00
  -2   3   5   19.70    1.60
   3  -3  -6    1.90    0.80
  -3   3   6    1.70    0.30
  -5   3   8   12.70    2.00
  -6   3   9    7.00    1.70
  -7   3  10    4.70    1.30
  -8   3  11    1.90    1.10
  -9   3  12   -0.50    0.90
 -10   3  13   13.20    2.70
 -11   3  14    6.70    2.00
 -12   3  15    1.80    1.50
 -13   3  16    0.70    1.50
 -14   3  17   -2.10    1.00
 -15   3  18    0.60    1.70
 -17  -2  13    8.20    2.80
 -16  -2  12    0.30    1.90
 -15  -2  11    0.90    1.80
 -14  -2  10    3.20    2.00
 -13  -2   9    0.40    1.50
 -12  -2   8    0.60    1.20
 -11  -2   7   17.40    3.10
  11   2  -7   17.10    2.10
 -10  -2   6  133.49   11.50
 -10  -2   6  132.29   12.90
  10   2  -6  137.09   10.60
  -9  -2   5   20.40    3.10
  -9  -2   5   40.20    5.50
   9   2  -5   22.40    2.30
  -8  -2   4   30.80    3.70
  -8  -2   4   23.90    4.50
   8   2  -4   26.40    2.50
  -7  -2   3  101.69    8.60
  -7  -2   3   80.89    7.50
   7   2  -3   87.09    7.00
  -6  -2   2    5.70    2.00
  -6  -2   2    9.20    1.60
   6   2  -2    8.30    1.10
  -5  -2   1   78.69    6.60
   5   2  -1   76.89    6.10
  -4  -2   0  280.77   23.40
   4   2   0  323.37   23.00
  -3  -2  -1  603.54   43.60
   3   2   1  542.15   43.10
  -2  -2  -2    2.50    1.20
   2   2   2    3.90    0.60
  -1  -2  -3   22.90    2.10
   1   2   3   18.80    1.70
   0  -2  -4  169.88   12.90
   0   2   4  165.78   12.70
   1  -2  -5  148.79   10.80
  -1   2   5  130.69   10.60
   2  -2  -6   44.90    4.30
  -2   2   6   54.29    3.90
   3  -2  -7    4.70    1.00
  -3   2   7    3.60    0.50
  -4   2   8  242.58   18.90
  -4   2   8  243.88   18.40
  -5   2   9   54.29    4.90
  -5   2   9   53.79    4.20
  -6   2  10    0.10    0.80
  -6   2  10    1.00    0.30
  -7   2  11   38.30    4.10
  -7   2  11   41.30    3.20
  -8   2  12    9.80    1.00
  -8   2  12    7.50    1.80
  -9   2  13    1.70    1.30
 -10   2  14   11.30    2.40
 -11   2  15    4.00    1.80
 -12   2  16   -0.10    1.20
 -13   2  17    4.80    2.10
 -14   2  18    4.80    2.00
 -15   2  19    3.90    2.20
 -17  -1  12   -0.60    1.70
 -16  -1  11    1.40    1.90
 -15  -1  10   -0.70    1.40
 -14  -1   9    0.40    1.40
 -13  -1   8    0.50    1.30
 -12  -1   7    2.60    1.50
 -11  -1   6   43.50    4.70
  11   1  -6   41.80    3.80
 -10  -1   5    4.70    1.60
  10   1  -5    6.90    1.10
  -9  -1   4   82.49    7.30
   9   1  -4   80.69    6.50
  -8  -1   3   32.00    3.50
   8   1  -3   29.30    2.90
  -7  -1   2   99.69    8.30
   7   1  -2   97.79    7.70
  -6  -1   1    8.20    1.50
   6   1  -1    7.40    1.00
  -5  -1   0   -0.10    0.60
   5   1   0    0.00    0.40
  -4  -1  -1   47.70    4.60
   4   1   1   57.09    4.20
  -3  -1  -2   38.60    4.10
   3   1   2   52.59    3.70
  -2  -1  -3   34.40    3.00
   2   1   3   26.50    2.40
  -1  -1  -4   43.80    3.10
   1   1   4   31.70    2.90
   0  -1  -5   13.00    1.30
   0   1   5   11.90    1.10
   1  -1  -6  576.84   43.40
  -1   1   6  572.24   43.20
  -2   1   7   11.60    1.10
  -3   1   8  116.79    9.50
  -3   1   8  120.59    9.10
  -4   1   9    2.10    0.50
  -4   1   9    3.30    1.00
  -5   1  10   57.39    5.90
  -5   1  10   53.99    4.90
  -6   1  11    8.10    2.60
  -6   1  11    4.90    1.40
  -7   1  12   74.19    7.00
  -7   1  12   90.99    8.50
  -8   1  13   12.80    2.30
  -8   1  13    7.80    2.70
  -9   1  14    5.30    2.40
  -9   1  14    3.50    1.60
 -10   1  15   -0.90    0.90
 -11   1  16   14.80    3.00
 -12   1  17    1.60    1.50
 -13   1  18   -0.40    1.40
 -14   1  19   -0.30    1.50
 -15   1  20    0.70    1.90
 -17   0  11    0.30    2.00
 -16   0  10    1.50    1.80
 -15   0   9   -0.50    1.30
 -14   0   8   -0.10    1.30
 -13   0   7    3.30    1.70
 -12   0   6    3.40    1.60
 -11   0   5    0.70    1.20
  11   0  -5    1.40    0.80
 -10   0   4    2.70    1.30
  10   0  -4    3.30    0.80
  -9   0   3    1.80    1.00
   9   0  -3    0.80    0.60
  -8   0   2    0.40    0.90
   8   0  -2    1.70    1.00
  -7   0   1   28.40    2.70
   7   0  -1   22.40    2.20
  -6   0   0   17.80    2.10
   6   0   0   14.70    1.50
   5   0   1   31.60    2.60
  -4   0  -2   97.29    7.80
   4   0   2   97.49    7.50
  -3   0  -3   63.79    5.30
   3   0   3   65.99    5.10
  -2   0  -4  158.68   12.90
   2   0   4  174.28   12.70
  -1   0  -5   13.40    1.20
   1   0   5   10.60    1.10
   0   0  -6    0.30    0.30
   0   0   6   -0.10    0.20
  -1   0   7   24.00    1.90
  -1   0   7   20.60    2.00
  -2   0   8  125.29   10.00
  -2   0   8  129.79    9.80
   3   0  -9  139.99   10.50
  -3   0   9  132.89   10.80
   4   0 -10   -0.10    0.40
  -4   0  10   -0.10    0.60
   5   0 -11   15.00    1.50
  -5   0  11   14.50    2.10
   6   0 -12  177.78   13.60
  -6   0  12  176.98   14.30
   7   0 -13   42.40    3.60
  -7   0  13   45.40    4.40
   8   0 -14    8.00    1.20
  -8   0  14    8.30    1.90
  -8   0  14    9.30    3.20
  -9   0  15    5.20    1.60
  -9   0  15    7.80    3.00
 -10   0  16    1.20    1.20
 -10   0  16    2.30    2.30
 -11   0  17    9.40    3.70
 -11   0  17    9.20    2.40
 -12   0  18    1.70    1.50
 -13   0  19    0.40    1.40
 -14   0  20   -1.10    1.50
 -15   0  21   -1.30    1.50
 -17   1  10    1.00    1.90
 -16   1   9   -2.10    1.50
 -15   1   8   -0.10    1.30
 -14   1   7   14.60    3.10
 -13   1   6    2.40    1.60
 -12   1   5    1.40    1.40
 -11   1   4    1.20    1.10
  11  -1  -4    2.20    0.80
 -10   1   3    2.10    1.10
  10  -1  -3    2.10    0.70
  -9   1   2   14.90    2.20
   9  -1  -2   12.20    1.40
  -8   1   1   24.40    3.20
   8  -1  -1   29.30    2.60
  -7   1   0    0.50    0.70
   7  -1   0    0.50    0.50
  -6   1  -1    7.30    1.30
   6  -1   1   11.30    1.10
  -5   1  -2    1.30    0.70
   5  -1   2    2.70    0.50
  -4   1  -3    3.90    0.80
   4  -1   3    3.80    0.60
  -3   1  -4   76.39    6.30
   3  -1   4   83.89    6.20
  -2   1  -5  103.69    8.70
   2  -1   5  126.29    8.80
   2  -1   5  114.59    8.70
  -1   1  -6  562.74   42.70
   1  -1   6  569.54   42.80
   1  -1   6  573.14   42.80
   0  -1   7   27.40    2.00
   0  -1   7   18.90    1.90
   1   1  -8   57.59    4.50
  -1  -1   8   55.29    4.60
   2   1  -9   27.60    2.30
  -2  -1   9   25.30    2.40
   3   1 -10   -0.10    0.40
  -3  -1  10    1.30    0.70
   4   1 -11    3.30    0.70
  -4  -1  11    4.50    1.10
   5   1 -12    1.00    0.70
  -5  -1  12    0.70    0.80
   6   1 -13   27.80    2.60
  -6  -1  13   24.50    4.20
  -6  -1  13   30.30    3.20
   7   1 -14   86.79    6.90
  -7  -1  14   86.19    7.70
   8   1 -15    1.40    0.70
  -8  -1  15   -0.30    0.90
   9   1 -16   34.50    3.10
  -9  -1  16   29.80    4.20
 -10  -1  17    6.10    3.00
 -10  -1  17    2.40    1.50
 -11  -1  18    3.10    1.70
 -11  -1  18    3.50    3.20
 -12  -1  19    9.60    2.50
 -12  -1  19    5.90    3.40
 -13  -1  20    3.70    3.30
 -13  -1  20    0.70    1.60
 -14  -1  21   -1.00    1.60
 -17   2   9    0.10    1.90
 -16   2   8   -2.70    1.30
 -15   2   7   -1.00    1.30
 -14   2   6    7.70    2.40
 -13   2   5    3.80    1.60
 -12   2   4   -0.20    1.00
 -11   2   3    3.40    1.40
 -10   2   2    4.10    1.40
  10  -2  -2    2.70    0.70
  -9   2   1    8.30    1.70
   9  -2  -1    5.20    0.90
  -8   2   0   45.30    4.30
   8  -2   0   46.80    3.80
  -7   2  -1   11.40    1.60
   7  -2   1    8.80    1.10
  -6   2  -2   18.70    2.10
   6  -2   2   22.30    1.90
  -5   2  -3  251.47   18.70
   5  -2   3  238.18   18.60
  -4   2  -4   30.60    2.40
   4  -2   4   23.50    2.30
  -3   2  -5  172.88   12.00
   3  -2   5  134.09   12.10
   3  -2   5  162.98   12.00
   2  -2   6   50.79    4.10
   1  -2   7    0.70    0.30
   1  -2   7    0.60    0.30
   1  -2   7    0.90    0.40
   0   2  -8  135.59   10.40
   0  -2   8  132.09   10.30
   1   2  -9    2.70    0.60
  -1  -2   9    1.10    0.50
   2   2 -10   14.70    1.60
  -2  -2  10   15.20    1.70
   3   2 -11   10.40    1.30
  -3  -2  11    8.50    1.40
   4   2 -12   10.00    1.40
  -4  -2  12   11.20    1.70
   5   2 -13    4.10    0.90
  -5  -2  13    1.60    1.00
  -5  -2  13    1.20    1.80
   6   2 -14    0.20    0.60
  -6  -2  14    1.90    1.80
  -6  -2  14    0.40    0.80
   7   2 -15   16.90    2.00
  -7  -2  15   18.60    2.90
   8   2 -16    2.10    1.10
  -8  -2  16   -0.10    0.80
   9   2 -17    4.60    1.20
  -9  -2  17    4.00    1.60
 -10  -2  18    2.20    1.50
 -11  -2  19    1.00    2.50
 -11  -2  19    1.70    1.60
 -12  -2  20    0.00    2.40
 -12  -2  20    4.50    2.00
 -13  -2  21    1.20    1.50
 -13  -2  21    4.50    3.60
 -14  -2  22    1.10    3.10
 -14  -2  22    0.40    1.60
 -17   3   8   -1.50    1.60
 -16   3   7    0.10    1.70
 -15   3   6    3.10    1.90
 -14   3   5   10.50    2.60
 -13   3   4    2.40    1.40
 -12   3   3    0.70    1.20
 -11   3   2   -0.10    1.00
 -10   3   1   30.10    3.20
  10  -3  -1   28.10    2.50
  -9   3   0   -2.20    0.70
   9  -3   0   -1.10    0.40
  -8   3  -1  210.08   16.40
   8  -3   1  207.88   16.00
  -7   3  -2   53.59    4.60
   7  -3   2   52.49    4.30
  -6   3  -3    9.00    1.40
   6  -3   3   15.80    1.40
  -5   3  -4    0.90    0.50
   5  -3   4    0.70    0.50
  -4   3  -5  545.85   42.10
   4  -3   5  573.34   42.20
  -3   3  -6    2.10    0.30
   3  -3   6    1.20    0.50
  -1   3  -8  263.47   20.70
   1  -3   8  277.67   20.60
   0   3  -9  128.69   10.30
   0  -3   9  134.79   10.20
   1   3 -10   39.30    3.40
  -1  -3  10   40.20    3.40
   2   3 -11    2.10    0.70
  -2  -3  11    2.80    0.80
   3   3 -12   16.30    1.90
  -3  -3  12   16.40    2.00
   4   3 -13   26.50    2.80
  -4  -3  13   25.50    2.80
  -4  -3  13   18.60    4.30
   5   3 -14   39.00    3.40
  -5  -3  14   39.30    5.30
  -5  -3  14   32.70    3.60
   6   3 -15   27.10    2.90
  -6  -3  15   35.60    3.50
  -6  -3  15   33.10    5.70
   7   3 -16   15.40    2.10
  -7  -3  16   18.40    2.90
   8   3 -17   -1.30    0.70
  -8  -3  17    0.40    1.00
   9   3 -18    7.30    1.50
  -9  -3  18    7.00    2.10
 -10  -3  19    1.00    1.40
 -11  -3  20   -1.40    1.10
 -12  -3  21    1.70    2.80
 -12  -3  21    1.40    1.80
 -13  -3  22    6.70    2.50
 -13  -3  22    6.40    3.60
 -14  -3  23    1.40    1.70
 -14  -3  23    1.50    3.10
 -17   4   7   -1.20    1.60
 -16   4   6    1.90    1.90
 -15   4   5    4.00    1.90
 -14   4   4    3.10    1.70
 -13   4   3    0.20    1.30
 -12   4   2    7.10    1.90
 -11   4   1   13.00    2.40
 -10   4   0   29.60    3.00
  10  -4   0   22.80    2.20
  -9   4  -1   12.20    2.10
   9  -4   1   12.70    1.50
  -8   4  -2    1.90    1.00
   8  -4   2    5.00    0.80
  -7   4  -3   27.90    2.70
   7  -4   3   22.40    2.40
  -6   4  -4    1.60    0.70
   6  -4   4    1.80    0.60
  -5   4  -5   41.90    3.60
   5  -4   5   47.10    3.70
  -4   4  -6    5.50    0.70
   4  -4   6    5.10    0.90
  -2   4  -8    1.40    0.30
  -2   4  -8    1.60    0.60
   2  -4   8    2.40    0.40
  -1   4  -9    5.00    0.90
   1  -4   9    8.00    1.20
   0   4 -10   -0.40    0.50
   0  -4  10   -0.10    0.50
   1   4 -11   91.69    7.40
  -1  -4  11   91.39    7.40
   2   4 -12    0.40    0.60
  -2  -4  12   -0.20    0.60
   3   4 -13   30.40    3.00
  -3  -4  13   27.70    3.00
   4   4 -14   95.49    7.60
  -4  -4  14   96.09    7.90
  -4  -4  14   81.59    9.50
   5   4 -15   49.20    4.40
  -5  -4  15   46.00    7.30
  -5  -4  15   53.39    4.90
   6   4 -16    0.10    0.70
  -6  -4  16    3.00    2.50
  -6  -4  16    0.60    0.90
   7   4 -17    1.20    0.90
  -7  -4  17    2.60    1.30
   8   4 -18   -0.70    0.80
  -8  -4  18    0.30    1.20
   9   4 -19    6.10    1.50
  -9  -4  19    4.20    1.70
  10   4 -20    1.50    1.50
 -10  -4  20    3.00    1.90
 -11  -4  21    1.40    1.80
 -12  -4  22   11.00    3.00
 -13  -4  23    2.90    2.10
 -13  -4  23    2.10    3.40
 -17   5   6   -0.50    1.60
 -16   5   5    0.20    1.70
 -15   5   4    0.50    1.50
 -14   5   3   -0.50    1.20
 -13   5   2    0.80    1.40
 -12   5   1   13.50    2.50
 -11   5   0    0.60    1.10
 -10   5  -1    0.10    0.90
  10  -5   1    0.70    0.60
  -9   5  -2   -0.60    0.80
   9  -5   2   -0.40    0.60
  -8   5  -3  239.58   18.30
   8  -5   3  229.28   17.90
  -7   5  -4    3.40    0.90
   7  -5   4    2.30    0.70
  -6   5  -5   52.79    4.00
   6  -5   5   37.60    3.90
  -5   5  -6    8.20    1.10
   5  -5   6   13.60    1.50
  -4   5  -7   70.49    5.50
   4  -5   7   71.19    5.80
  -3   5  -8    9.50    1.30
   3  -5   8    7.60    0.80
  -2   5  -9   21.70    2.20
   2  -5   9   22.80    2.00
  -1   5 -10   26.20    2.40
   1  -5  10   22.10    2.60
   0   5 -11   16.90    2.00
   0  -5  11   15.50    2.10
   1   5 -12   10.60    1.60
  -1  -5  12   14.10    1.90
   2   5 -13   57.59    5.10
  -2  -5  13   59.49    5.20
   3   5 -14   13.00    2.00
  -3  -5  14   15.70    2.30
  -3  -5  14   21.50    4.80
   4   5 -15   45.50    4.10
  -4  -5  15   48.40    7.40
  -4  -5  15   44.50    4.40
   5   5 -16   37.20    3.70
  -5  -5  16   39.70    4.10
  -5  -5  16   49.10    7.80
   6   5 -17    1.70    1.20
  -6  -5  17    5.20    1.50
   7   5 -18   11.00    1.90
  -7  -5  18   16.90    3.00
   8   5 -19   11.60    1.90
  -8  -5  19    8.90    2.30
   9   5 -20   -1.00    1.20
  -9  -5  20   -0.30    1.50
  10   5 -21    1.90    1.30
 -10  -5  21   -0.20    1.40
 -11  -5  22    4.30    2.10
 -12  -5  23    1.30    1.80
 -13  -5  24   -0.50    2.00
 -17   6   5    0.00    1.90
 -16   6   4    1.90    1.80
 -15   6   3    1.50    1.60
 -14   6   2   -0.30    1.20
 -13   6   1    3.00    1.80
 -12   6   0  119.59   10.30
 -11   6  -1    1.20    1.10
 -10   6  -2   15.00    2.30
  -9   6  -3    2.10    1.00
   9  -6   3    4.60    0.90
  -8   6  -4   18.80    2.10
   8  -6   4   18.70    2.00
  -7   6  -5    0.40    0.60
   7  -6   5    0.60    0.60
  -6   6  -6    8.00    1.30
   6  -6   6   17.20    1.70
  -5   6  -7  140.49   10.60
   5  -6   7  132.69   10.80
  -4   6  -8  241.28   18.80
   4  -6   8  245.38   18.50
  -3   6  -9    1.30    1.30
   3  -6   9    4.80    0.80
  -2   6 -10    2.90    1.40
  -1   6 -11    2.00    1.20
   1  -6  11   -0.20    1.20
   0   6 -12  169.68   13.50
   0  -6  12  172.98   13.80
   1   6 -13   95.09    8.00
  -1  -6  13   99.19    8.20
   2   6 -14    3.10    1.10
  -2  -6  14    3.20    1.20
  -2  -6  14   -0.60    1.90
   3   6 -15   90.09    7.90
  -3  -6  15   96.59    8.20
  -3  -6  15  102.99   10.60
   4   6 -16   -0.30    0.80
  -4  -6  16   -0.60    2.20
  -4  -6  16    0.70    0.90
   5   6 -17    7.70    1.70
  -5  -6  17    4.60    1.50
  -5  -6  17    2.30    2.90
   6   6 -18    0.90    1.10
  -6  -6  18    1.70    1.20
   7   6 -19    3.80    1.40
  -7  -6  19    4.50    1.80
   8   6 -20   -0.90    1.60
  -8  -6  20    0.20    1.30
   9   6 -21   -0.70    1.20
  -9  -6  21    1.60    1.70
  10   6 -22    2.80    1.50
 -10  -6  22   -0.20    1.50
 -11  -6  23   -0.60    1.60
 -12  -6  24    1.60    1.90
 -14   7   1   -0.90    1.60
 -13   7   0   -1.90    1.30
 -12   7  -1   21.70    3.20
 -11   7  -2   29.30    3.40
 -10   7  -3    1.60    1.00
  -9   7  -4   -0.20    0.80
   9  -7   4    1.60    0.80
  -8   7  -5    5.50    1.20
   8  -7   5    2.90    0.80
  -7   7  -6    2.80    0.80
   7  -7   6    1.50    0.80
   6  -7   7    4.50    1.00
  -4   7  -9   18.80    2.40
   4  -7   9   22.50    2.00
  -3   7 -10    1.10    0.70
   3  -7  10    1.70    0.50
  -2   7 -11   64.49    5.50
   2  -7  11   64.39    5.30
  -1   7 -12   12.80    1.70
   1  -7  12    7.50    1.80
   0   7 -13   45.30    3.80
   0  -7  13   35.40    4.20
   1   7 -14   26.90    3.00
  -1  -7  14   43.40    7.00
  -1  -7  14   21.00    3.30
   2   7 -15    4.80    1.30
  -2  -7  15   12.10    4.00
  -2  -7  15    6.40    1.70
   3   7 -16   20.70    2.50
  -3  -7  16   16.20    2.60
  -3  -7  16   10.10    4.00
   4   7 -17   34.00    3.70
  -4  -7  17   41.70    7.50
  -4  -7  17   40.00    4.30
   5   7 -18   -1.60    0.90
  -5  -7  18   -1.00    1.00
   6   7 -19    4.20    1.40
  -6  -7  19    4.10    1.70
   7   7 -20    0.10    1.90
  -7  -7  20   -0.60    1.20
   8   7 -21   -0.20    1.20
  -8  -7  21   -1.50    1.10
   9   7 -22    2.10    1.50
  -9  -7  22    0.00    1.40
  10   7 -23    0.90    1.40
 -10  -7  23    1.00    1.60
 -11  -7  24    1.50    2.00
   9  -8   5    6.40    1.20
   8  -8   6    9.00    1.40
  -7   8  -7    9.20    1.60
   7  -8   7   11.50    1.60
  -6   8  -8    2.10    0.70
   6  -8   8    2.00    0.90
  -5   8  -9    3.10    1.00
   5  -8   9    3.50    0.80
  -4   8 -10    2.70    1.00
   4  -8  10    2.30    0.70
  -3   8 -11    0.20    0.80
   3  -8  11   -0.50    0.40
  -2   8 -12   62.89    5.50
   2  -8  12   62.49    5.20
  -1   8 -13   36.70    3.50
   1  -8  13   32.50    3.70
   0   8 -14    5.90    1.40
   0  -8  14    6.90    2.30
   0  -8  14   11.40    4.00
   1   8 -15    1.40    0.90
  -1  -8  15    0.80    1.40
  -1  -8  15    4.10    2.90
   2   8 -16    6.00    1.70
  -2  -8  16    6.30    2.00
  -2  -8  16    6.00    3.40
   3   8 -17    4.70    1.40
  -3  -8  17    2.90    1.60
  -3  -8  17   -0.80    2.10
   4   8 -18    7.00    1.80
  -4  -8  18    9.00    4.40
  -4  -8  18    6.60    2.10
   5   8 -19    2.70    1.40
  -5  -8  19    2.40    1.60
   6   8 -20    0.00    1.70
  -6  -8  20    3.60    1.80
   7   8 -21   -1.10    1.20
  -7  -8  21   -0.60    1.30
   8   8 -22    0.90    1.30
  -8  -8  22   -1.30    1.30
   9   8 -23    0.50    1.40
  -9  -8  23   -0.40    1.60
  10   8 -24    2.20    1.60
 -10  -8  24   -1.80    1.40
 -11  -8  25   -0.40    1.90
   9  -9   6   -0.50    0.70
   8  -9   7    1.90    1.00
   7  -9   8    0.70    0.80
   6  -9   9    0.50    0.90
  -5   9 -10    0.00    1.10
  -4   9 -11   54.29    5.00
  -3   9 -12    6.80    1.50
  -2   9 -13   21.20    2.70
  -1   9 -14   23.30    3.00
   1  -9  14   27.20    6.30
   0   9 -15    5.50    1.50
   0  -9  15    6.50    2.50
   0  -9  15   14.00    5.00
   1   9 -16    0.30    1.00
  -1  -9  16   -1.70    1.60
  -1  -9  16   -0.70    2.50
   2   9 -17    3.90    1.40
  -2  -9  17   -0.70    2.80
  -2  -9  17    0.30    1.60
   3   9 -18    4.60    1.60
  -3  -9  18   15.80    5.50
  -3  -9  18    5.30    2.20
   4   9 -19    0.00    1.30
  -4  -9  19   -0.80    1.40
   5   9 -20    4.60    1.80
  -5  -9  20    2.50    2.00
   6   9 -21    0.90    1.40
  -6  -9  21    2.20    1.90
   7   9 -22   -0.60    1.40
  -7  -9  22    0.00    1.50
   8   9 -23   -0.30    1.40
  -8  -9  23    0.40    1.70
   9   9 -24   -2.00    1.30
  -9  -9  24   -0.50    1.80
  10   9 -25   -3.00    1.60
 -10  -9  25    1.10    2.20
   8 -10   8    0.00    0.80
   7 -10   9   -0.20    0.90
  -5  10 -11    2.10    1.10
  -4  10 -12   19.70    2.80
   4 -10  12   33.90    6.90
   3 -10  13   10.60    4.40
  -2  10 -14    0.30    1.00
   2 -10  14    0.30    2.00
  -1  10 -15    2.70    1.30
   1 -10  15    4.80    4.20
   0  10 -16    0.90    1.10
   0 -10  16    0.20    2.70
   1  10 -17    4.20    1.50
  -1 -10  17    1.70    2.80
   2  10 -18   -1.20    1.20
  -2 -10  18    0.80    3.30
   3  10 -19    0.60    2.00
   4  10 -20   -2.10    1.20
   5  10 -21    0.00    1.40
   6  10 -22    1.60    1.70
   7  10 -23   -0.60    1.60
   8  10 -24    1.30    1.70
  -8 -10  24   -2.10    2.70
   9  10 -25   -1.70    1.80
  -9 -10  25   -1.50    3.40
   8 -11   9    2.30    1.30
   8 -11   9    0.90    3.90
   7 -11  10    2.30    3.10
   7 -11  10    0.30    1.20
   6 -11  11   -0.60    3.10
  -5  11 -12    9.50    2.00
   5 -11  12   11.60    5.00
  -4  11 -13    5.20    1.50
   4 -11  13    9.10    4.40
  -3  11 -14    0.30    1.10
   3 -11  14   -0.70    3.00
  -2  11 -15    2.40    1.40
   2 -11  15    6.00    4.10
  -1  11 -16    2.00    1.40
   1 -11  16    1.70    3.40
   0  11 -17    9.20    2.50
   0 -11  17    9.90    4.80
   1  11 -18   -0.90    1.50
  -1 -11  18    2.60    3.90
   2  11 -19    1.10    1.50
   3  11 -20   -0.80    1.40
   4  11 -21   -0.30    1.40
   5  11 -22    1.40    1.90
   6  11 -23    1.10    1.60
   7  11 -24    4.30    2.10
   8  11 -25   -1.80    1.70
   8 -12  10   -0.10    2.90
   8 -12  10    2.10    1.30
   7 -12  11    2.60    3.60
   7 -12  11   -0.70    1.00
   6 -12  12   -0.20    3.10
  -5  12 -13    1.70    1.50
   5 -12  13    1.40    3.90
  -4  12 -14    3.10    1.60
   4 -12  14    2.10    3.90
  -3  12 -15    0.40    1.50
   3 -12  15   -1.60    3.50
  -2  12 -16    1.90    1.60
   2 -12  16    4.20    4.30
  -1  12 -17   -1.70    1.10
   1 -12  17   -0.30    3.70
   0  12 -18    3.10    1.70
   0 -12  18    0.90    3.50
   1  12 -19   -0.90    1.50
   2  12 -20   -1.10    1.40
   3  12 -21    1.60    2.10
   4  12 -22    2.90    1.70
   5  12 -23   -0.80    1.70
   6  12 -24   -2.00    1.80
   8 -13  11   -2.60    1.30
   8 -13  11    1.00    3.80
   7 -13  12    0.30    3.50
   7 -13  12    2.00    1.30
   6 -13  13    0.40    3.20
  -5  13 -14    7.00    2.00
   5 -13  14    1.50    3.90
  -4  13 -15    5.70    1.80
   4 -13  15    8.40    5.20
  -3  13 -16    0.30    1.50
   3 -13  16   -1.20    3.00
  -2  13 -17    8.00    2.10
   2 -13  17    6.70    4.50
  -1  13 -18    1.70    1.60
   0  13 -19    2.10    1.90
   1  13 -20   -0.50    1.70
   2  13 -21    1.90    1.80
   3  13 -22    0.30    1.90
   4  13 -23    0.10    2.20
   5  13 -24   -1.50    2.00
   7 -14  13    0.60    1.30
   7 -14  13    1.20    3.40
   6 -14  14    1.90    4.10
  -5  14 -15   -0.80    1.50
   5 -14  15   -3.50    3.20
  -4  14 -16   -3.40    1.30
  -3  14 -17    3.20    2.00
  -2  14 -18    0.20    1.70
  -1  14 -19   -0.80    1.60
   0  14 -20    0.40    1.70
   1  14 -21    0.50    1.80
   2  14 -22    6.20    2.50
   3  14 -23    6.60    2.60
   7 -15  14    2.20    1.50
  -5  15 -16   -1.00    1.70
  -4  15 -17    0.90    2.10
  -3  15 -18    1.80    2.00
  -2  15 -19    2.50    2.10
  -1  15 -20   -0.90    2.10
   0  15 -21   -3.30    1.80
   3  17 -12    6.20    2.70
   2  17 -11    0.70    2.20
   1  17 -10   -2.90    1.80
   0  17  -9   -0.30    1.80
  -1  17  -8    0.50    1.80
  -2  17  -7    0.40    1.70
  -3  17  -6    1.20    1.70
   6  16 -14   -0.10    2.00
   5  16 -13    3.40    2.30
   4  16 -12   -2.10    1.60
   3  16 -11    1.20    1.90
   2  16 -10   -2.30    1.50
   1  16  -9    2.30    1.90
   0  16  -8    0.30    1.70
  -1  16  -7   -1.20    1.70
  -2  16  -6    5.90    2.10
  -3  16  -5    1.70    1.60
  -4  16  -4    0.00    1.50
  -8 -15  15   -1.70    4.60
  -7 -15  14   -6.60    3.50
   7  15 -14    1.10    2.20
  -6 -15  13   -4.70    3.40
   6  15 -13   -0.90    1.80
  -5 -15  12    1.60    4.10
   5  15 -12   -0.30    1.60
  -4 -15  11    3.00    4.40
   4  15 -11    0.80    1.80
  -3 -15  10    1.70    3.80
   3  15 -10   -1.00    1.70
   2  15  -9    1.40    1.60
   1  15  -8    0.80    1.60
   0  15  -7    2.00    1.60
  -1  15  -6   -0.30    1.40
  -2  15  -5   -0.20    1.40
  -3  15  -4    2.40    1.40
  -4  15  -3   -0.90    1.10
  -9 -14  15   -2.90    4.00
   9  14 -15   -0.70    2.30
  -8 -14  14   -3.30    3.30
   8  14 -14    0.90    1.80
  -7 -14  13   -1.40    3.80
   7  14 -13    0.10    1.50
  -6 -14  12   -3.50    3.50
   6  14 -12    2.10    2.00
  -5 -14  11   -1.20    4.00
   5  14 -11   -2.00    1.30
  -4 -14  10    2.70    3.70
   4  14 -10    1.20    1.60
  -3 -14   9    1.10    3.10
   3  14  -9   -0.30    1.40
  -2 -14   8    1.70    2.60
   2  14  -8   -1.60    1.30
  -1 -14   7   14.90    3.60
   1  14  -7    9.20    2.20
   0 -14   6    9.50    3.00
   0  14  -6    8.00    2.00
   1 -14   5    1.70    2.30
  -1  14  -5   -1.10    1.40
   2 -14   4    2.50    2.00
  -2  14  -4    3.50    1.60
   3 -14   3    4.20    1.90
  -3  14  -3    5.30    1.70
   4 -14   2    1.20    1.60
  -4  14  -2    1.80    1.40
 -10 -13  15   -3.00    2.90
  10  13 -15   -0.70    2.30
  -9 -13  14   -3.90    3.20
   9  13 -14   -1.10    1.60
  -8 -13  13   -3.60    3.30
   8  13 -13   -0.30    1.70
  -7 -13  12    0.20    3.70
   7  13 -12    2.20    1.80
  -6 -13  11    2.20    3.70
   6  13 -11    3.90    1.80
  -5 -13  10   -2.10    3.40
   5  13 -10    2.60    1.70
  -4 -13   9    7.50    4.90
   4  13  -9    2.60    1.60
  -3 -13   8    6.60    3.60
   3  13  -8    0.60    1.80
  -2 -13   7    0.00    2.40
   2  13  -7    3.70    1.50
  -1 -13   6    0.80    1.90
   1  13  -6    1.10    1.20
   0 -13   5   13.50    2.90
   0  13  -5   13.30    2.30
   1 -13   4    6.00    2.00
  -1  13  -4    6.10    1.60
   2 -13   3    8.30    2.10
  -2  13  -3    3.90    1.40
   3 -13   2    8.70    2.10
  -3  13  -2    8.60    1.70
   4 -13   1    8.20    2.00
  -4  13  -1    3.30    1.40
   5 -13   0    1.30    2.00
  -5  13   0    1.20    1.20
   6 -13  -1    7.60    2.20
   7 -13  -2   18.20    3.10
   8 -13  -3    3.00    1.90
 -10  13   5   -0.70    1.50
 -11 -12  15    0.00    2.70
  11  12 -15   -1.10    2.20
 -10 -12  14    0.70    3.20
  10  12 -14   -3.70    1.30
  -9 -12  13   -0.70    2.90
   9  12 -13    2.10    2.00
  -8 -12  12    2.30    3.30
   8  12 -12    6.70    2.10
  -7 -12  11   -2.70    3.00
   7  12 -11    1.80    1.60
  -6 -12  10    3.90    4.10
   6  12 -10    2.00    1.70
  -5 -12   9    1.70    3.10
   5  12  -9    1.90    1.50
  -4 -12   8    3.00    3.20
   4  12  -8    4.00    1.60
  -3 -12   7    4.50    3.20
   3  12  -7    0.40    1.00
  -2 -12   6    0.40    2.20
   2  12  -6    1.10    1.10
  -1 -12   5    7.30    2.40
   1  12  -5    2.10    1.20
   0 -12   4    7.30    2.10
   0  12  -4    3.30    1.30
   1 -12   3    5.80    1.90
  -1  12  -3    5.00    1.30
   2 -12   2    1.30    1.20
  -2  12  -2    0.80    0.90
   3 -12   1    1.50    1.20
  -3  12  -1    0.10    0.90
   4 -12   0    0.80    1.20
  -4  12   0   -0.20    0.80
   5 -12  -1    0.20    1.10
  -5  12   1    2.70    1.10
   6 -12  -2    1.30    1.50
   7 -12  -3   17.90    3.70
   8 -12  -4    0.50    1.60
 -10  12   6    5.40    2.10
 -11  12   7    1.10    1.60
 -12  12   8   -0.30    1.70
 -13  12   9   -0.10    1.80
 -12 -11  15   -3.50    2.30
  12  11 -15   -0.30    2.00
 -11 -11  14   -1.60    2.40
  11  11 -14   -1.40    1.60
 -10 -11  13    3.60    2.90
  10  11 -13    6.70    2.40
  -9 -11  12    1.20    2.60
   9  11 -12    5.20    2.10
  -8 -11  11   -0.50    2.80
   8  11 -11    1.10    1.70
  -7 -11  10   -2.90    2.50
   7  11 -10   -0.40    1.90
  -6 -11   9   -3.90    2.40
   6  11  -9   -1.20    1.10
  -5 -11   8    1.60    3.00
   5  11  -8    2.00    1.30
  -4 -11   7    6.60    3.20
   4  11  -7    2.10    1.20
  -3 -11   6   12.60    3.90
   3  11  -6   11.30    2.00
  -2 -11   5    5.20    2.90
   2  11  -5    4.90    1.50
  -1 -11   4    2.70    1.90
   1  11  -4    2.30    1.10
   0 -11   3    3.90    1.70
   0  11  -3    2.50    1.00
   1 -11   2   18.90    3.00
  -1  11  -2   18.90    2.50
   2 -11   1    6.50    1.80
  -2  11  -1    9.00    1.60
   3 -11   0    1.20    1.40
  -3  11   0   -0.70    0.70
   4 -11  -1    1.20    1.20
  -4  11   1    0.40    0.80
   5 -11  -2   -0.90    1.00
  -5  11   2    0.00    0.70
   6 -11  -3   -0.40    1.20
   7 -11  -4   -0.60    1.30
   8 -11  -5    5.00    2.30
  -9  11   6   13.80    2.80
 -10  11   7    0.70    1.50
 -11  11   8   -0.70    1.50
 -12  11   9    0.50    1.70
 -13  11  10   -1.60    1.70
 -13 -10  15   -2.80    1.90
  13  10 -15   -0.40    1.90
 -12 -10  14    0.80    2.60
  12  10 -14    2.60    1.80
 -11 -10  13   -2.20    2.00
  11  10 -13    1.30    1.80
 -10 -10  12   -0.40    2.30
  10  10 -12   -0.40    1.50
  -9 -10  11   -1.80    2.20
   9  10 -11   -0.60    1.30
  -8 -10  10   -0.70    2.10
   8  10 -10   -0.10    1.30
  -7 -10   9    4.00    2.70
   7  10  -9   -1.20    0.90
  -6 -10   8    3.40    2.60
   6  10  -8    0.60    1.10
  -5 -10   7   10.80    3.80
   5  10  -7    2.80    1.30
  -4 -10   6    5.80    3.00
   4  10  -6    1.00    1.00
  -3 -10   5   -1.00    2.00
   3  10  -5    0.20    0.80
  -2 -10   4   12.40    3.10
   2  10  -4    8.40    1.60
  -1 -10   3    3.30    1.70
   1  10  -3    1.50    0.90
   0 -10   2    8.20    2.00
   0  10  -2    7.30    1.40
   1 -10   1   15.30    2.60
  -1  10  -1   18.20    2.20
   2 -10   0   17.40    2.60
  -2  10   0   13.00    1.90
   3 -10  -1   27.00    3.10
  -3  10   1   23.80    2.80
   4 -10  -2    0.70    1.00
  -4  10   2    0.20    0.60
   5 -10  -3   36.50    4.10
  -5  10   3   35.40    3.20
   6 -10  -4    1.40    1.30
   7 -10  -5    3.70    1.70
   8 -10  -6    0.20    1.40
  -9  10   7    5.90    2.10
 -10  10   8   -0.70    1.40
 -11  10   9   -0.60    1.50
 -12  10  10    0.50    1.80
 -13  10  11    0.00    1.60
 -14  10  12    1.40    2.00
 -14  -9  15   -2.20    2.20
 -13  -9  14    0.10    2.30
  13   9 -14    2.30    1.70
 -12  -9  13    1.60    2.20
  12   9 -13    2.60    1.90
 -11  -9  12   -3.90    1.70
  11   9 -12    0.70    1.40
 -10  -9  11   -0.40    2.00
  10   9 -11    6.80    1.80
  -9  -9  10    2.60    2.20
   9   9 -10    4.20    1.60
  -8  -9   9    0.10    1.90
   8   9  -9   -0.80    1.00
  -7  -9   8    1.30    1.90
   7   9  -8    3.00    1.10
  -6  -9   7    0.50    2.30
   6   9  -7    1.80    1.20
  -5  -9   6   -0.80    2.10
   5   9  -6    1.00    0.90
  -4  -9   5    2.10    2.50
   4   9  -5    1.80    1.00
  -3  -9   4   12.20    3.50
   3   9  -4   12.20    1.90
  -2  -9   3   14.10    3.20
   2   9  -3    8.80    1.50
  -1  -9   2   19.80    3.20
   1   9  -2   12.90    1.90
   0  -9   1   40.00    4.30
   0   9  -1   39.50    3.70
   1  -9   0    0.40    1.00
  -1   9   0   -0.60    0.60
   2  -9  -1    5.70    1.40
  -2   9   1    3.50    1.00
   3  -9  -2   12.50    2.10
  -3   9   2   10.30    1.50
   4  -9  -3   19.60    2.90
  -4   9   3   22.90    2.20
   5  -9  -4    4.00    1.40
  -5   9   4    2.60    0.70
   6  -9  -5   -0.40    1.10
  -6   9   5    0.00    0.50
   7  -9  -6    2.90    1.50
  -9   9   8   -0.40    1.20
 -10   9   9   -0.70    1.40
 -11   9  10    5.40    2.10
 -12   9  11    8.00    2.60
 -13   9  12    1.40    1.70
 -14   9  13    0.20    1.80
 -15  -8  15   -3.70    2.10
 -15  -8  15    1.00    4.00
 -14  -8  14    1.00    2.20
 -13  -8  13   10.00    3.50
  13   8 -13   13.20    2.50
 -12  -8  12    0.10    1.90
  12   8 -12    0.00    1.40
 -11  -8  11    1.00    2.00
  11   8 -11   -0.10    1.40
 -10  -8  10    1.70    2.10
  10   8 -10    0.00    1.30
  -9  -8   9    4.70    2.40
   9   8  -9    9.10    1.80
  -8  -8   8    2.40    2.00
   8   8  -8   -0.60    0.80
  -7  -8   7    4.10    2.30
   7   8  -7    5.70    1.40
  -6  -8   6    3.30    2.10
   6   8  -6    1.90    1.00
  -5  -8   5   12.20    3.00
   5   8  -5    8.20    1.50
  -4  -8   4   56.39    6.40
   4   8  -4   46.00    4.40
  -3  -8   3    3.40    2.60
   3   8  -3    6.20    1.20
  -2  -8   2   13.60    4.00
  -1  -8   1   28.80    4.20
   1   8  -1   24.30    2.80
   0  -8   0   73.39    7.10
   0   8   0   80.69    6.40
   1  -8  -1   21.80    3.20
  -1   8   1   14.50    2.00
   2  -8  -2   13.60    2.50
  -2   8   2   18.40    2.00
   3  -8  -3    2.80    1.10
  -3   8   3    0.20    0.60
   4  -8  -4   46.40    4.30
  -4   8   4   40.60    3.60
   5  -8  -5   10.50    2.00
  -5   8   5    9.50    1.20
   6  -8  -6    7.70    1.90
  -6   8   6    9.10    1.10
   7  -8  -7    6.80    2.00
  -8   8   8   -1.10    0.80
  -9   8   9    0.70    1.30
 -10   8  10    0.20    1.20
 -11   8  11    2.70    1.80
 -12   8  12   10.80    2.70
 -13   8  13    1.60    1.70
 -14   8  14   -2.10    1.50
 -15  -7  14   -3.90    3.30
 -15  -7  14    0.60    2.30
 -14  -7  13   -2.80    1.80
 -14  -7  13    2.00    3.20
 -13  -7  12    1.30    2.00
  13   7 -12    2.20    1.50
 -12  -7  11    1.50    2.00
  12   7 -11    1.00    1.40
 -11  -7  10    1.30    1.70
  11   7 -10    2.50    1.90
 -10  -7   9   -2.10    1.00
  10   7  -9   -1.10    0.90
  -9  -7   8    1.70    1.80
   9   7  -8    0.10    0.90
  -8  -7   7    8.20    2.50
   8   7  -7    5.70    1.40
  -7  -7   6   -0.10    1.40
   7   7  -6    2.60    0.90
  -6  -7   5    0.10    1.60
   6   7  -5   -0.70    0.60
  -5  -7   4    0.10    1.40
   5   7  -4    2.20    0.80
  -4  -7   3   31.90    5.20
   4   7  -3   28.60    3.10
  -3  -7   2   52.39    6.20
  -2  -7   1   16.80    3.10
   2   7  -1    8.70    1.30
  -1  -7   0    0.40    1.20
   1   7   0    0.40    0.60
   0  -7  -1   21.80    3.00
   0   7   1   24.30    2.30
   1  -7  -2  100.39    8.20
  -1   7   2   93.79    7.70
   2  -7  -3   90.39    7.50
  -2   7   3   87.29    7.00
   3  -7  -4   31.40    3.30
  -3   7   4   25.10    2.40
   4  -7  -5   46.70    4.30
  -4   7   5   41.60    3.60
   5  -7  -6   26.20    3.00
  -5   7   6   22.10    2.00
   6  -7  -7    0.90    1.10
  -6   7   7    1.90    0.40
  -8   7   9   -0.60    0.90
  -9   7  10    3.10    1.60
 -10   7  11   -0.20    1.30
 -11   7  12    4.80    2.10
 -12   7  13    2.40    1.60
 -13   7  14    2.30    1.60
 -14   7  15   -1.70    1.40
 -15   7  16    1.10    1.90
 -16  -6  14   -0.50    2.10
 -16  -6  14   -0.60    4.20
 -15  -6  13    1.10    1.90
 -15  -6  13   -1.60    3.30
 -14  -6  12    1.70    2.30
 -14  -6  12   -0.40    3.60
 -13  -6  11   -0.60    1.60
 -13  -6  11    0.00    3.20
  13   6 -11   -2.10    1.30
 -12  -6  10    8.30    2.90
  12   6 -10   12.10    2.20
 -11  -6   9    2.20    1.80
  11   6  -9    0.50    1.00
 -10  -6   8    1.70    1.70
  10   6  -8    2.30    1.20
  -9  -6   7    3.10    1.70
   9   6  -7    3.10    1.20
  -8  -6   6    4.60    2.00
   8   6  -6    5.70    1.30
  -7  -6   5   -0.70    1.10
   7   6  -5    0.30    0.70
  -6  -6   4   -1.50    1.20
   6   6  -4    1.00    0.80
  -5  -6   3   43.20    5.00
   5   6  -3   39.60    3.70
  -4  -6   2   11.00    2.70
   4   6  -2   12.80    1.70
  -3  -6   1   68.99    7.00
   3   6  -1   68.19    5.60
  -2  -6   0   75.59    7.30
   2   6   0   75.59    6.10
  -1  -6  -1    9.30    2.10
   1   6   1   10.10    1.30
   0  -6  -2  209.68   17.20
   0   6   2  225.78   16.70
   1  -6  -3  112.79    8.70
  -1   6   3   99.39    8.20
   2  -6  -4   54.59    5.00
  -2   6   4   56.09    4.50
   3  -6  -5   56.69    5.30
  -3   6   5   62.29    4.80
   4  -6  -6   39.20    4.40
  -4   6   6   48.00    3.60
   5  -6  -7  156.58   12.60
  -5   6   7  152.68   11.70
   6  -6  -8    4.70    1.50
  -7   6   9    3.60    1.50
  -8   6  10   16.90    2.90
  -9   6  11   13.40    2.70
 -10   6  12    4.30    1.90
 -11   6  13    2.30    1.50
 -12   6  14   -1.70    1.10
 -13   6  15   -1.80    1.00
 -14   6  16   -1.00    1.50
 -15   6  17   -1.80    1.40
 -16  -5  13   -2.80    1.60
 -15  -5  12   -4.10    2.80
 -15  -5  12    0.30    1.90
 -14  -5  11    1.50    3.30
 -14  -5  11    3.80    2.20
 -13  -5  10   -1.30    1.50
 -13  -5  10   -0.70    2.90
  13   5 -10   -0.90    1.20
 -12  -5   9    1.10    1.40
 -12  -5   9   -1.00    2.30
  12   5  -9    2.70    1.30
 -11  -5   8    1.60    1.60
  11   5  -8    1.40    1.10
 -10  -5   7   -0.30    1.20
  10   5  -7   -0.60    0.80
  -9  -5   6    0.80    1.20
   9   5  -6    0.60    0.80
  -8  -5   5    5.30    1.80
   8   5  -5    7.80    1.30
  -7  -5   4   14.90    2.90
   7   5  -4   19.80    2.20
  -6  -5   3   29.30    4.10
   6   5  -3   28.40    2.90
  -5  -5   2    0.50    1.20
   5   5  -2    1.40    0.70
  -4  -5   1    6.30    2.10
   4   5  -1   12.10    1.40
  -3  -5   0    1.50    1.80
   3   5   0    0.30    0.50
  -2  -5  -1   21.10    3.30
   2   5   1   15.00    1.70
  -1  -5  -2   -0.10    1.10
   1   5   2    1.40    0.60
   0  -5  -3    9.90    1.70
   0   5   3   11.40    1.30
   1  -5  -4    6.40    1.30
  -1   5   4    6.40    0.90
   2  -5  -5   16.90    2.10
  -2   5   5   19.00    1.70
   3  -5  -6    1.50    0.90
  -3   5   6    0.90    0.40
   4  -5  -7   82.39    6.70
  -4   5   7   74.69    6.00
   5  -5  -8    4.80    2.30
  -5   5   8    5.40    0.60
  -6   5   9    3.60    1.30
  -7   5  10    9.50    2.00
  -8   5  11    1.50    1.20
  -9   5  12    5.60    1.90
 -10   5  13    8.80    2.30
 -11   5  14   19.40    3.30
 -12   5  15   -0.30    1.50
 -13   5  16    9.50    2.60
 -14   5  17    2.60    2.00
 -15   5  18    1.00    1.80
 -16  -4  12    5.20    2.70
 -15  -4  11   -1.30    1.80
 -14  -4  10    0.40    1.60
 -14  -4  10    0.50    2.90
 -13  -4   9    0.90    3.70
 -13  -4   9    0.80    1.90
 -12  -4   8    0.90    2.50
 -12  -4   8   -0.60    1.10
  12   4  -8    0.70    1.10
 -11  -4   7    1.00    2.30
 -11  -4   7    4.90    2.00
  11   4  -7    0.70    1.00
 -10  -4   6    4.60    1.70
 -10  -4   6    6.00    2.90
  10   4  -6    8.20    1.40
  -9  -4   5   12.20    2.60
   9   4  -5   13.00    1.80
  -8  -4   4   37.50    4.30
   8   4  -4   38.50    3.50
  -7  -4   3   33.50    4.40
   7   4  -3   34.20    3.30
  -6  -4   2    3.80    1.70
   6   4  -2    5.50    1.00
  -5  -4   1   66.89    6.00
   5   4  -1   58.09    5.00
  -4  -4   0   14.90    2.80
   4   4   0   15.10    1.70
  -3  -4  -1 9518.75  732.83
   3   4   1 9999.00  732.83
  -2  -4  -2 3309.17  249.97
   2   4   2 3331.27  249.28
  -1  -4  -3    3.40    1.40
   1   4   3    2.80    0.70
   0  -4  -4    5.70    1.30
   0   4   4    6.20    0.90
   1  -4  -5   66.49    5.80
  -1   4   5   71.79    5.50
   2  -4  -6    0.00    0.60
  -2   4   6    1.00    0.40
   3  -4  -7   43.60    4.00
  -3   4   7   44.90    3.50
   4  -4  -8   -0.50    0.70
  -4   4   8    0.20    0.30
  -6   4  10    0.40    0.90
  -7   4  11   12.30    2.40
  -8   4  12   28.70    3.90
  -9   4  13    9.00    2.20
 -10   4  14    4.10    1.60
 -11   4  15    0.10    1.20
 -12   4  16    0.90    1.40
 -13   4  17   -1.10    1.30
 -14   4  18   -1.20    1.50
 -15   4  19    0.80    1.80
 -17  -3  12    5.40    2.60
 -16  -3  11    0.80    2.10
 -15  -3  10    0.00    1.70
 -14  -3   9    1.60    2.00
 -13  -3   8   -0.10    1.30
 -12  -3   7    1.00    2.60
 -12  -3   7   -1.30    1.00
  12   3  -7    0.70    0.90
 -11  -3   6    7.80    2.40
 -11  -3   6   21.20    4.70
  11   3  -6   13.70    1.80
 -10  -3   5   50.09    7.30
 -10  -3   5   55.29    5.60
  10   3  -5   54.49    4.70
  -9  -3   4    3.50    2.30
  -9  -3   4    8.60    2.10
   9   3  -4    6.10    1.20
  -8  -3   3   -0.10    1.00
  -8  -3   3    1.10    1.80
   8   3  -3    1.90    0.80
  -7  -3   2   37.50    4.40
  -7  -3   2   29.10    3.60
   7   3  -2   32.40    2.90
  -6  -3   1   -0.10    0.90
   6   3  -1    1.20    0.60
  -5  -3   0   -0.30    0.90
   5   3   0    0.80    0.50
  -4  -3  -1  140.29   11.90
   4   3   1  147.59   11.20
  -3  -3  -2  217.28   17.10
   3   3   2  206.58   16.10
  -2  -3  -3   42.70    4.80
   2   3   3   50.99    3.90
  -1  -3  -4   69.89    6.30
   1   3   4   79.59    5.90
   0  -3  -5  216.58   17.40
   0   3   5  233.08   17.10
   1  -3  -6   33.20    3.50
  -1   3   6   47.20    3.30
   2  -3  -7   86.69    7.00
  -2   3   7   84.49    6.60
   3  -3  -8    3.90    1.10
  -3   3   8    7.50    0.80
  -4   3   9    1.80    0.40
  -5   3  10    4.10    1.30
  -5   3  10    5.20    0.60
  -6   3  11   -0.40    0.70
  -6   3  11   -0.30    0.30
  -7   3  12    0.00    0.90
  -8   3  13   29.60    3.50
  -9   3  14    0.10    0.90
 -10   3  15   34.50    4.10
 -11   3  16   17.30    3.20
 -12   3  17    1.10    1.50
 -13   3  18    1.10    1.60
 -14   3  19   -1.80    1.20
 -15   3  20   -1.20    1.40
 -17  -2  11   -0.30    1.70
 -16  -2  10    4.90    2.60
 -15  -2   9    0.10    1.60
 -14  -2   8    1.00    1.60
 -13  -2   7   -2.40    1.10
 -12  -2   6    0.30    1.20
  12   2  -6    2.00    1.00
 -11  -2   5    1.30    1.30
  11   2  -5    2.10    1.10
 -10  -2   4    2.10    1.30
  10   2  -4    0.60    0.70
  -9  -2   3   65.79    6.10
   9   2  -3   62.89    5.30
  -8  -2   2   15.10    3.80
  -8  -2   2   13.90    2.60
   8   2  -2   18.40    2.00
  -7  -2   1    0.00    1.30
  -7  -2   1    0.70    0.90
   7   2  -1   -0.40    0.50
  -6  -2   0   55.49    5.40
   6   2   0   63.29    4.90
  -5  -2  -1   75.49    6.60
   5   2   1   76.69    6.10
  -4  -2  -2  155.88   13.10
   4   2   2  168.68   12.50
  -3  -2  -3  508.95   41.40
   3   2   3  568.54   40.80
  -2  -2  -4  553.24   40.50
   2   2   4  509.25   40.00
  -1  -2  -5  113.29    9.40
   1   2   5  125.89    9.20
   0  -2  -6  251.77   19.30
   0   2   6  250.47   19.10
   1  -2  -7    0.30    0.50
  -1   2   7    0.50    0.30
   2  -2  -8   23.30    2.30
  -2   2   8   21.20    1.90
   3  -2  -9   18.90    2.30
  -3   2   9   24.10    1.90
  -4   2  10   32.80    3.90
  -4   2  10   32.40    3.20
  -4   2  10   32.50    2.60
  -5   2  11    3.70    1.20
  -5   2  11    0.80    1.40
  -5   2  11    2.70    0.50
  -6   2  12    0.40    0.90
  -6   2  12    1.30    0.40
  -6   2  12    2.50    1.80
  -7   2  13    1.50    1.70
  -7   2  13    2.10    0.50
  -7   2  13    2.00    1.10
  -8   2  14    1.50    1.10
  -9   2  15   14.20    2.70
 -10   2  16   -0.70    0.90
 -11   2  17    1.50    1.40
 -12   2  18    1.70    1.50
 -13   2  19   -1.20    1.20
 -14   2  20    1.20    1.90
 -15   2  21   -0.40    1.70
 -17  -1  10   -0.80    1.80
 -16  -1   9    0.80    1.90
 -15  -1   8    0.40    1.50
 -14  -1   7   -1.30    1.30
 -13  -1   6   -0.40    1.20
 -12  -1   5   17.30    3.10
  12   1  -5   20.50    2.30
 -11  -1   4   12.00    2.40
  11   1  -4   14.30    1.80
 -10  -1   3    8.90    2.10
  10   1  -3   14.30    1.70
  -9  -1   2   -0.10    0.90
   9   1  -2    0.80    0.70
  -8  -1   1   20.00    2.70
   8   1  -1   15.60    2.00
  -7  -1   0    1.00    0.80
   7   1   0    0.00    0.50
  -6  -1  -1    8.20    1.50
   6   1   1    6.10    0.90
  -5  -1  -2   12.50    1.90
   5   1   2   13.00    1.40
  -4  -1  -3  370.76   30.10
   4   1   3  410.96   29.70
  -3  -1  -4   18.10    2.90
   3   1   4   25.60    2.10
  -2  -1  -5  138.99   10.40
   2   1   5  125.79   10.10
  -1  -1  -6  586.04   44.60
   1   1   6  595.44   44.50
   0  -1  -7   17.30    1.90
   0   1   7   23.00    1.80
  -1   1   8   59.89    4.70
  -2   1   9    1.00    0.40
  -3   1  10   40.90    3.30
  -3   1  10   38.60    3.70
  -4   1  11   79.29    6.90
  -4   1  11   84.19    6.40
  -5   1  12   11.20    2.00
  -5   1  12   12.40    1.30
  -6   1  13   97.79    7.30
  -6   1  13   76.09    8.10
  -6   1  13   75.29    6.40
  -7   1  14   29.50    2.50
  -7   1  14   31.00    4.90
  -7   1  14   26.40    3.20
  -8   1  15    4.40    0.80
  -8   1  15    3.20    1.40
  -8   1  15    4.30    2.20
  -9   1  16    0.50    1.00
  -9   1  16    0.00    1.70
 -10   1  17    4.00    1.70
 -10   1  17    2.70    2.50
 -11   1  18   -0.10    1.00
 -12   1  19    0.30    1.50
 -13   1  20    0.90    1.50
 -14   1  21    0.20    1.80
 -17   0   9   -0.90    1.70
 -16   0   8    0.80    1.90
 -15   0   7   -1.60    1.10
 -14   0   6    6.50    2.40
 -13   0   5   14.80    2.90
 -12   0   4    5.40    1.70
 -11   0   3    2.60    1.40
  11   0  -3    0.80    0.80
 -10   0   2    6.70    1.70
  10   0  -2    7.60    1.20
  -9   0   1   38.70    3.90
   9   0  -1   38.30    3.30
  -8   0   0   71.59    6.80
   8   0   0   85.69    6.40
  -7   0  -1   24.40    2.60
   7   0   1   22.00    2.10
  -6   0  -2  214.88   17.10
   6   0   2  224.88   16.80
  -5   0  -3   12.70    1.70
   5   0   3   10.90    1.30
  -4   0  -4    8.10    1.40
   4   0   4    5.50    0.90
  -3   0  -5  207.08   17.20
   3   0   5  235.78   16.90
  -2   0  -6  219.98   16.80
   2   0   6  221.58   16.80
  -1   0  -7   17.50    1.70
   1   0   7   22.00    1.80
   0   0  -8  143.19   11.80
   0   0   8  163.08   11.70
  -1   0   9  140.39   10.80
  -1   0   9  135.79   10.60
  -2   0  10    8.90    1.40
  -2   0  10    8.90    1.10
  -3   0  11   36.50    3.20
  -3   0  11   40.20    3.60
  -4   0  12    2.20    0.90
  -4   0  12    2.30    0.60
  -5   0  13   19.50    2.70
  -6   0  14   19.80    2.80
  -7   0  15    9.10    1.90
  -7   0  15    4.20    2.20
  -8   0  16    0.20    1.70
  -8   0  16    1.30    1.20
  -9   0  17    1.90    1.10
  -9   0  17    5.00    2.60
 -10   0  18    1.40    1.20
 -10   0  18    1.40    2.20
 -11   0  19    1.80    2.70
 -11   0  19   -0.20    1.10
 -12   0  20   -0.50    1.10
 -12   0  20   -1.90    2.30
 -13   0  21    0.00    1.60
 -14   0  22   -1.10    1.50
 -17   1   8    1.20    2.10
 -16   1   7    1.30    2.00
 -15   1   6    0.20    1.60
 -14   1   5    1.30    1.90
 -13   1   4    6.00    2.00
 -12   1   3   -0.20    1.10
 -11   1   2   17.60    2.90
  11  -1  -2   19.80    2.00
 -10   1   1    8.90    1.90
  10  -1  -1   10.00    1.30
  -9   1   0    0.50    0.80
   9  -1   0   -0.10    0.50
  -8   1  -1   26.40    3.00
   8  -1   1   27.80    2.60
  -7   1  -2  165.38   12.80
   7  -1   2  159.48   12.50
  -6   1  -3  135.39   10.80
   6  -1   3  138.09   10.60
  -5   1  -4   19.40    2.00
   5  -1   4   19.30    1.80
  -4   1  -5  196.88   14.90
   4  -1   5  189.48   14.80
  -3   1  -6   80.19    6.50
   3  -1   6   80.99    6.30
  -2   1  -7   13.40    1.20
   2  -1   7   10.20    1.30
   2  -1   7   12.40    1.50
  -1   1  -8   53.19    4.30
   1  -1   8   56.09    4.40
   0  -1   9  146.19   11.10
   0  -1   9  142.19   11.10
  -1  -1  10  183.28   14.40
  -1  -1  10  190.98   14.40
  -2  -1  11    6.60    1.20
   3   1 -12    6.40    1.00
  -3  -1  12    5.80    1.10
   4   1 -13   80.19    6.30
  -4  -1  13   75.69    6.60
   5   1 -14    6.40    1.20
  -5  -1  14   10.60    1.90
   6   1 -15   26.40    2.60
  -6  -1  15   28.90    3.20
   7   1 -16    3.10    0.90
  -7  -1  16   -0.60    1.70
  -7  -1  16    3.10    1.30
   8   1 -17    3.20    1.00
  -8  -1  17    5.30    1.70
  -9  -1  18    8.10    2.20
 -10  -1  19    2.80    1.60
 -10  -1  19    4.50    2.80
 -11  -1  20    3.90    1.90
 -11  -1  20    1.70    2.60
 -12  -1  21   -0.20    2.60
 -12  -1  21    1.30    1.50
 -13  -1  22    6.30    3.70
 -13  -1  22    8.80    2.60
 -14  -1  23    0.80    1.80
 -18   2   8    1.60    2.10
 -17   2   7   -2.50    1.50
 -16   2   6    2.40    2.00
 -15   2   5   18.20    3.50
 -14   2   4    1.30    1.80
 -13   2   3    5.10    1.90
 -12   2   2    5.40    1.60
 -11   2   1    0.90    1.10
  11  -2  -1    0.40    0.70
 -10   2   0   23.00    2.60
  10  -2   0   19.10    2.00
  -9   2  -1    5.90    1.40
   9  -2   1    4.70    0.90
  -8   2  -2    7.10    1.60
   8  -2   2   13.20    1.40
  -7   2  -3   21.80    2.30
   7  -2   3   19.90    2.00
  -6   2  -4  141.59   10.20
   6  -2   4  117.19   10.00
  -5   2  -5   13.40    1.50
   5  -2   5   14.50    1.40
  -4   2  -6    5.60    0.80
   4  -2   6    2.10    0.60
  -3   2  -7    3.20    0.60
   3  -2   7    3.70    0.40
   3  -2   7    3.80    0.70
   2  -2   8   23.60    1.80
   2  -2   8   23.60    1.90
   2  -2   8   22.40    2.10
   1  -2   9   29.20    2.40
   1  -2   9   31.40    2.60
   0  -2  10   10.20    1.30
   0  -2  10    9.10    1.10
   1   2 -11   22.10    2.10
  -1  -2  11   20.20    2.10
   2   2 -12  104.19    8.40
  -2  -2  12  109.29    8.60
   3   2 -13    5.70    1.00
  -3  -2  13    6.90    1.40
   4   2 -14   17.80    2.10
  -4  -2  14   19.90    2.70
   5   2 -15   23.80    2.30
  -5  -2  15   20.20    2.80
   6   2 -16    3.00    0.90
  -6  -2  16    3.40    1.20
  -6  -2  16    0.90    1.90
   7   2 -17   18.90    2.20
  -7  -2  17   14.00    3.80
  -7  -2  17   18.10    2.80
   8   2 -18   -0.60    0.70
  -8  -2  18    0.40    1.10
   9   2 -19    1.50    1.00
  -9  -2  19   -1.00    1.00
 -10  -2  20    0.10    1.40
 -11  -2  21    3.60    1.90
 -11  -2  21    2.50    3.20
 -12  -2  22    0.00    2.70
 -12  -2  22    4.00    2.10
 -13  -2  23    0.80    3.10
 -13  -2  23    1.30    1.80
 -14  -2  24   -0.30    1.70
 -14  -2  24   -1.20    2.50
 -17   3   6    3.00    2.10
 -16   3   5   -1.20    1.60
 -15   3   4    5.50    2.10
 -14   3   3   15.10    2.90
 -13   3   2   -0.50    1.10
 -12   3   1    0.40    1.20
 -11   3   0   -0.50    0.80
  11  -3   0    0.70    1.00
 -10   3  -1   32.20    3.40
  10  -3   1   31.40    2.80
  -9   3  -2    7.00    1.60
   9  -3   2   11.50    1.30
  -8   3  -3    5.00    1.20
   8  -3   3    6.20    1.00
  -7   3  -4  166.68   13.60
   7  -3   4  183.68   13.50
  -6   3  -5  140.79   11.10
   6  -3   5  145.29   11.10
  -5   3  -6   -0.40    0.40
   5  -3   6    0.30    0.50
  -4   3  -7   35.30    3.00
  -4   3  -7   42.00    3.10
   4  -3   7   40.00    3.30
   3  -3   8    9.00    1.30
   2  -3   9   10.30    1.30
   1  -3  10    0.60    0.40
   0   3 -11   37.80    3.20
   0  -3  11   34.90    3.10
   1   3 -12   55.89    4.80
  -1  -3  12   57.69    4.80
   2   3 -13  223.78   17.30
  -2  -3  13  225.28   17.50
   3   3 -14   95.89    8.30
  -3  -3  14  108.39    8.50
   4   3 -15   57.29    5.30
  -4  -3  15   71.99    5.80
   5   3 -16   23.10    2.40
  -5  -3  16   23.30    2.70
  -5  -3  16   20.00    4.60
   6   3 -17    1.50    0.90
  -6  -3  17    0.20    2.00
  -6  -3  17    2.70    1.20
   7   3 -18   27.10    2.70
  -7  -3  18   21.40    3.30
   8   3 -19    8.30    1.60
  -8  -3  19    7.20    1.90
   9   3 -20   -0.50    1.00
  -9  -3  20   -0.70    1.10
 -10  -3  21    4.90    1.90
 -11  -3  22    0.40    1.50
 -12  -3  23    3.70    3.80
 -12  -3  23    7.20    2.30
 -13  -3  24    2.00    1.90
 -13  -3  24   -3.10    2.20
 -17   4   5   -0.20    1.70
 -16   4   4    1.80    1.70
 -15   4   3    2.70    1.60
 -14   4   2   13.90    2.80
 -13   4   1    0.20    1.30
 -12   4   0   28.20    3.70
 -11   4  -1   12.60    2.30
 -10   4  -2    0.30    0.90
  10  -4   2    1.00    0.60
  -9   4  -3    4.70    1.40
   9  -4   3    8.60    1.20
  -8   4  -4   55.49    4.70
   8  -4   4   51.19    4.40
  -7   4  -5    3.00    0.90
   7  -4   5    5.00    0.90
  -6   4  -6   54.89    4.40
   6  -4   6   49.70    4.40
  -5   4  -7    1.00    0.40
   5  -4   7    1.50    0.60
   4  -4   8    0.20    0.60
   3  -4   9   82.69    6.70
   2  -4  10    0.00    0.50
  -1   4 -11    5.50    1.10
   1  -4  11    4.50    0.80
   0   4 -12    3.20    0.90
   0  -4  12    2.30    0.70
   1   4 -13    1.10    0.70
  -1  -4  13    0.60    0.60
   2   4 -14  112.19    9.10
  -2  -4  14  112.99    9.10
   3   4 -15    1.60    0.80
  -3  -4  15    1.70    0.80
   4   4 -16   25.10    2.40
  -4  -4  16   18.90    2.70
   5   4 -17    6.80    1.40
  -5  -4  17   13.10    3.90
  -5  -4  17    5.90    1.50
   6   4 -18    1.20    1.10
  -6  -4  18   -0.70    2.30
  -6  -4  18    0.00    0.80
   7   4 -19   15.80    2.20
  -7  -4  19   18.20    2.90
   8   4 -20    4.20    1.30
  -8  -4  20    3.60    1.60
   9   4 -21   22.10    2.80
  -9  -4  21   19.40    3.30
 -10  -4  22    6.30    2.20
 -11  -4  23   -0.30    1.30
 -12  -4  24    3.30    2.00
 -13  -4  25   -0.40    2.70
 -13  -4  25    1.20    2.00
 -17   5   4    1.00    1.80
 -16   5   3    0.30    1.50
 -15   5   2   -1.30    1.30
 -14   5   1    0.10    1.40
 -13   5   0    2.60    1.50
 -12   5  -1   13.40    2.40
 -11   5  -2    1.50    1.20
 -10   5  -3   -0.30    0.90
  10  -5   3    1.70    0.80
  -9   5  -4   14.10    1.90
   9  -5   4    9.10    1.50
  -8   5  -5    9.70    1.50
   8  -5   5   12.60    1.50
  -7   5  -6   30.20    2.70
   7  -5   6   28.70    2.70
  -6   5  -7    7.20    1.00
   6  -5   7    9.30    1.30
  -5   5  -8    5.90    0.80
   5  -5   8    4.00    1.20
   4  -5   9   49.40    4.30
  -2   5 -11   15.60    1.90
   2  -5  11   12.70    1.50
  -1   5 -12    1.30    0.80
   1  -5  12   -0.70    0.70
   0   5 -13   21.70    2.50
   0  -5  13   19.90    2.40
   1   5 -14   15.80    2.10
  -1  -5  14   15.70    2.10
   2   5 -15   38.10    3.60
  -2  -5  15   38.60    3.70
   3   5 -16    2.00    0.90
  -3  -5  16    0.40    0.80
   4   5 -17   17.10    2.20
  -4  -5  17   16.20    2.50
  -4  -5  17   12.00    3.80
   5   5 -18    1.90    1.30
  -5  -5  18    6.60    3.40
  -5  -5  18   -0.30    0.90
   6   5 -19    2.00    1.10
  -6  -5  19   -0.40    2.40
  -6  -5  19    1.40    1.20
   7   5 -20   10.30    1.80
  -7  -5  20    7.40    2.00
   8   5 -21    2.20    1.80
  -8  -5  21    2.80    1.70
   9   5 -22   10.60    2.10
  -9  -5  22   11.60    2.70
 -10  -5  23    8.10    2.50
 -11  -5  24    0.30    1.60
 -12  -5  25    0.90    1.90
 -15   6   1    1.10    1.90
 -14   6   0    4.30    1.90
 -13   6  -1    0.10    1.50
 -12   6  -2    0.30    1.20
 -11   6  -3    1.20    1.00
 -10   6  -4    9.10    1.80
  10  -6   4   15.00    1.80
  -9   6  -5    2.10    0.90
   9  -6   5    2.50    0.80
  -8   6  -6    3.50    1.00
   8  -6   6    3.90    0.90
  -7   6  -7    7.80    1.20
   7  -6   7    8.90    1.30
  -6   6  -8    4.10    0.70
   6  -6   8    3.00    0.90
  -5   6  -9    1.90    0.40
   5  -6   9    4.90    1.00
   4  -6  10   52.49    4.60
  -3   6 -11    2.20    0.90
  -2   6 -12   79.89    6.40
   2  -6  12   73.79    6.10
  -1   6 -13   26.80    2.70
   1  -6  13   24.50    2.90
   0   6 -14   15.00    2.10
   0  -6  14   20.50    2.60
   1   6 -15    7.70    1.50
  -1  -6  15    9.10    1.70
   2   6 -16    2.80    1.10
  -2  -6  16    4.40    1.30
   3   6 -17    3.90    1.20
  -3  -6  17    0.70    2.10
  -3  -6  17    5.10    1.40
   4   6 -18    0.80    1.10
  -4  -6  18    1.30    1.10
  -4  -6  18    0.20    2.30
   5   6 -19    0.70    1.00
  -5  -6  19    3.70    1.40
  -5  -6  19    0.50    3.00
   6   6 -20    3.10    1.40
  -6  -6  20    1.40    1.30
  -6  -6  20    1.10    2.80
   7   6 -21    4.90    2.00
  -7  -6  21    3.30    1.70
   8   6 -22    0.90    1.20
  -8  -6  22   -1.00    1.20
   9   6 -23    0.60    1.20
  -9  -6  23   -0.70    1.40
 -10  -6  24    3.70    2.10
 -11  -6  25    3.10    2.20
  10  -7   5    1.50    0.80
  -9   7  -6    1.30    1.30
   9  -7   6   -0.20    0.70
  -8   7  -7    7.10    1.20
   8  -7   7    7.70    1.30
  -7   7  -8    4.50    0.90
   7  -7   8    4.30    1.10
  -6   7  -9    4.80    0.70
   6  -7   9    2.10    0.90
  -5   7 -10   11.80    1.10
   5  -7  10   10.70    1.70
  -3   7 -12    0.80    0.80
   3  -7  12    1.80    0.40
  -2   7 -13   18.30    2.40
   2  -7  13   22.20    2.10
  -1   7 -14   85.29    6.50
   1  -7  14   68.09    6.60
   0   7 -15   10.10    1.70
   0  -7  15    8.70    1.90
   1   7 -16   29.80    3.00
  -1  -7  16   26.90    3.30
   2   7 -17    2.10    1.20
  -2  -7  17    1.00    1.00
  -2  -7  17    0.00    2.50
   3   7 -18   10.20    1.80
  -3  -7  18   10.80    4.50
  -3  -7  18    6.00    1.80
   4   7 -19    2.60    1.20
  -4  -7  19    3.30    1.40
  -4  -7  19    2.20    3.00
   5   7 -20   17.40    2.50
  -5  -7  20   27.00    6.80
  -5  -7  20   16.30    2.90
   6   7 -21    0.30    1.80
  -6  -7  21    1.90    1.40
   7   7 -22    2.00    1.30
  -7  -7  22   -1.00    1.20
   8   7 -23    0.30    1.20
  -8  -7  23   -0.70    1.40
   9   7 -24    2.00    1.50
  -9  -7  24    0.30    1.60
  10   7 -25   -0.40    1.40
 -10  -7  25    0.00    1.70
 -11  -7  26   -1.60    1.50
   9  -8   7    7.30    1.40
   8  -8   8    0.00    0.70
   7  -8   9    6.60    1.40
   6  -8  10    2.10    0.90
   5  -8  11    2.20    1.00
  -4   8 -12    6.50    1.50
  -3   8 -13    1.40    1.00
  -2   8 -14   -0.20    0.80
  -1   8 -15    0.90    0.80
   1  -8  15   -3.20    1.90
   0   8 -16    3.20    1.30
   0  -8  16    1.00    1.60
   1   8 -17    0.10    0.90
  -1  -8  17    3.50    3.20
  -1  -8  17    0.30    1.30
   2   8 -18    0.10    1.00
  -2  -8  18    0.50    2.50
  -2  -8  18   -0.60    1.20
   3   8 -19    3.70    1.50
  -3  -8  19    5.30    3.40
  -3  -8  19    2.70    1.50
   4   8 -20    5.10    1.60
  -4  -8  20    3.40    3.30
  -4  -8  20    4.00    1.80
   5   8 -21   14.20    2.70
  -5  -8  21   11.10    4.60
  -5  -8  21    9.40    2.50
   6   8 -22    0.00    1.20
  -6  -8  22   -0.60    1.30
   7   8 -23    0.20    1.40
  -7  -8  23   -0.80    1.30
   8   8 -24   -0.90    1.30
  -8  -8  24    0.10    1.50
   9   8 -25   -1.00    1.30
  -9  -8  25    1.10    1.80
  10   8 -26    0.70    1.80
 -10  -8  26    0.10    1.80
   9  -9   8   -0.30    0.80
   8  -9   9   10.00    1.70
   7  -9  10   -0.10    0.80
   6  -9  11    1.20    1.00
  -4   9 -13    8.10    1.60
  -3   9 -14    9.00    1.80
  -2   9 -15    7.30    1.60
  -1   9 -16   24.80    3.10
   0   9 -17    2.30    1.30
   0  -9  17    2.40    2.90
   1   9 -18   -0.40    1.00
  -1  -9  18   -1.40    2.50
   2   9 -19   -0.40    1.20
  -2  -9  19    1.80    3.20
   3   9 -20    8.60    2.20
  -3  -9  20    5.80    4.20
   4   9 -21    1.60    1.50
  -4  -9  21    3.50    3.80
   5   9 -22   -0.10    1.40
  -5  -9  22   -3.70    1.90
   6   9 -23   -0.40    1.20
  -6  -9  23   -2.20    1.20
   7   9 -24    1.60    1.70
  -7  -9  24    2.30    1.90
   8   9 -25    1.00    1.60
  -8  -9  25    0.20    1.70
   9   9 -26    0.30    2.00
  -9  -9  26    3.00    2.40
   9 -10   9    2.40    1.40
   8 -10  10    2.20    1.10
   7 -10  11    0.20    1.00
   6 -10  12    8.10    1.70
  -4  10 -14    7.10    1.70
  -3  10 -15   18.80    2.70
  -2  10 -16   -1.20    0.90
   2 -10  16    3.00    3.30
  -1  10 -17    2.40    1.40
   1 -10  17    9.70    4.80
   0  10 -18    4.80    1.60
   0 -10  18    1.60    3.10
   1  10 -19   10.20    2.30
  -1 -10  19   12.70    5.10
   2  10 -20    1.10    1.60
  -2 -10  20   -0.90    3.00
   3  10 -21    1.40    1.60
  -3 -10  21   -0.90    2.70
   4  10 -22   -1.40    1.30
   5  10 -23    1.80    1.80
   6  10 -24    1.70    1.80
   7  10 -25   -2.30    1.50
   8  10 -26    2.10    2.10
   9 -11  10    1.10    1.10
   8 -11  11    1.00    1.20
   7 -11  12   -0.10    1.10
   6 -11  13    8.30    2.00
   5 -11  14    6.30    4.00
  -4  11 -15    7.50    2.10
   4 -11  15   11.00    4.90
  -3  11 -16    5.50    2.10
   3 -11  16    6.50    4.40
  -2  11 -17    6.30    2.40
   2 -11  17    6.60    4.50
  -1  11 -18    4.00    1.90
   1 -11  18    6.50    5.30
   0  11 -19   -1.40    1.20
   0 -11  19    0.50    3.40
   1  11 -20    2.10    1.60
  -1 -11  20   -0.10    3.70
   2  11 -21   -1.50    1.30
  -2 -11  21    1.50    3.50
   3  11 -22    1.60    1.60
   4  11 -23    0.30    1.60
   5  11 -24    3.40    2.00
   6  11 -25    0.00    1.60
   7  11 -26   -1.00    1.70
   8 -12  12   -0.60    3.50
   8 -12  12   -1.00    1.10
   7 -12  13    4.50    4.20
   7 -12  13    9.70    1.90
   6 -12  14   -1.20    1.00
   6 -12  14   -1.40    3.30
   5 -12  15    3.50    3.90
  -4  12 -16    0.80    1.40
   4 -12  16   -0.60    2.90
  -3  12 -17    3.50    1.80
   3 -12  17    3.60    4.30
  -2  12 -18    5.70    2.00
   2 -12  18    7.70    4.70
  -1  12 -19    5.00    1.90
   1 -12  19    6.60    4.70
   0  12 -20   -3.90    1.20
   0 -12  20   -1.70    2.80
   1  12 -21    5.60    2.00
  -1 -12  21    3.80    4.20
   2  12 -22    0.30    1.60
   3  12 -23   -1.80    1.40
   4  12 -24    5.90    2.20
   5  12 -25    0.20    2.10
   8 -13  13   12.70    6.10
   8 -13  13   11.00    2.20
   7 -13  14    1.20    1.50
   7 -13  14    1.50    4.00
   6 -13  15   -0.70    3.80
   6 -13  15    2.00    1.40
   5 -13  16    1.50    3.90
  -4  13 -17   -1.00    1.50
   4 -13  17   -0.30    3.80
  -3  13 -18    8.50    2.50
   3 -13  18    9.80    5.50
  -2  13 -19    0.90    2.00
   2 -13  19    3.30    4.50
  -1  13 -20    1.00    1.90
   1 -13  20    0.30    4.40
   0  13 -21    0.20    1.70
   1  13 -22   -0.20    1.70
   2  13 -23    4.90    2.20
   3  13 -24   -2.50    1.80
   4  13 -25   -0.50    2.10
   8 -14  14   -0.80    1.60
   8 -14  14    3.20    4.50
   7 -14  15    0.50    4.40
   7 -14  15   -0.30    1.30
   6 -14  16    4.90    1.70
   6 -14  16   -0.10    3.40
   5 -14  17   -0.10    4.20
  -4  14 -18   -3.40    1.50
   4 -14  18    0.30    3.30
  -3  14 -19   -0.20    1.60
   3 -14  19    1.20    4.30
  -2  14 -20    0.40    1.80
  -1  14 -21    2.70    2.00
   0  14 -22    2.50    2.10
   1  14 -23   -1.00    2.10
   7 -15  16    0.20    1.50
   6 -15  17   -2.10    1.40
  -4  15 -19    0.20    2.10
  -3  15 -20   -4.80    1.80
  -2  15 -21    2.50    2.20
   0  18  -8   -1.00    1.90
  -1  18  -7   -1.10    1.90
  -2  18  -6   -1.50    1.70
  -3  18  -5    1.50    2.20
   4  17 -11    1.50    2.30
   3  17 -10    1.50    2.30
   2  17  -9    2.80    2.00
   1  17  -8    4.10    2.20
   0  17  -7   -2.60    1.50
  -1  17  -6    2.20    2.00
  -2  17  -5    3.20    2.00
  -3  17  -4   -1.90    1.50
   6  16 -12    1.20    2.30
   5  16 -11    0.20    1.60
   4  16 -10    2.50    2.00
   3  16  -9   -2.50    1.50
   2  16  -8    0.60    1.80
   1  16  -7    1.00    1.70
   0  16  -6    0.10    1.70
  -1  16  -5    0.20    1.80
  -2  16  -4    0.50    1.50
  -3  16  -3    3.00    1.90
  -8 -15  13   -4.80    4.20
   8  15 -13    2.10    2.60
  -7 -15  12   -2.40    3.90
   7  15 -12   -0.80    1.60
  -6 -15  11    0.40    4.60
   6  15 -11   -2.40    1.60
  -5 -15  10    0.20    4.20
   5  15 -10    4.60    2.30
  -4 -15   9    0.20    3.60
   4  15  -9   -2.00    1.60
  -3 -15   8    7.70    3.60
   3  15  -8    2.00    1.70
  -2 -15   7    2.30    2.60
   2  15  -7   -0.80    1.40
  -1 -15   6    2.90    2.50
   1  15  -6    0.00    1.50
   0 -15   5    4.20    2.30
   0  15  -5    0.40    1.30
   1 -15   4    1.80    2.00
  -1  15  -4    0.00    1.30
   2 -15   3    0.30    1.50
  -2  15  -3   -1.60    1.10
   3 -15   2    1.70    3.00
  -3  15  -2    2.20    1.40
  -4  15  -1    0.90    1.40
 -10 -14  14    0.40    4.60
  -9 -14  13   -3.50    3.70
   9  14 -13    1.30    2.20
  -8 -14  12   -2.20    3.50
   8  14 -12   -0.60    1.90
  -7 -14  11   -5.40    4.00
   7  14 -11   -1.60    1.60
  -6 -14  10   -2.90    3.70
   6  14 -10    1.20    1.80
  -5 -14   9    2.00    4.00
   5  14  -9    0.10    1.40
  -4 -14   8    0.30    3.80
   4  14  -8   -0.50    1.40
  -3 -14   7    2.90    3.50
   3  14  -7    1.40    1.50
  -2 -14   6    9.10    3.40
   2  14  -6    5.50    1.90
  -1 -14   5    2.20    3.10
   1  14  -5    1.90    1.60
   0 -14   4    8.80    3.40
   0  14  -4    4.00    2.10
   1 -14   3   -1.60    2.60
  -1  14  -3    0.60    1.80
   2 -14   2    2.60    2.30
  -2  14  -2    2.10    1.70
   3 -14   1   -0.40    1.70
  -3  14  -1    0.10    1.20
   4 -14   0    2.00    1.60
  -4  14   0    1.20    1.20
   5 -14  -1    4.60    1.90
   6 -14  -2    8.60    2.40
   7 -14  -3   -1.90    1.60
   8 -14  -4    0.20    2.10
 -11 -13  14   -0.40    3.80
  11  13 -14   -3.60    1.90
 -10 -13  13   -2.40    3.20
  10  13 -13   -1.00    1.60
  -9 -13  12   -3.50    3.20
   9  13 -12    0.90    1.80
  -8 -13  11    1.10    3.70
   8  13 -11    4.60    2.40
  -7 -13  10   -3.80    3.30
   7  13 -10    1.20    1.60
  -6 -13   9   -0.60    3.60
   6  13  -9   -2.30    1.30
  -5 -13   8    5.50    4.00
   5  13  -8    2.90    1.70
  -4 -13   7    3.10    4.20
   4  13  -7   -3.00    2.00
  -3 -13   6   -2.60    2.60
   3  13  -6   -1.50    1.00
  -2 -13   5    1.70    2.20
   2  13  -5    2.30    1.40
  -1 -13   4    8.00    2.60
   1  13  -4    3.50    1.40
   0 -13   3    1.80    1.70
   0  13  -3   -0.90    1.10
   1 -13   2    6.70    2.10
  -1  13  -2    4.40    1.40
   2 -13   1    4.30    1.70
  -2  13  -1    4.00    1.30
   3 -13   0   -0.50    1.20
  -3  13   0    0.40    1.00
   4 -13  -1    1.80    1.60
  -4  13   1    1.40    1.00
   5 -13  -2    1.80    2.30
   6 -13  -3    1.90    1.70
   7 -13  -4   -0.10    1.50
   8 -13  -5    8.00    2.50
   9 -13  -6    0.30    2.10
 -10  13   7    2.00    1.80
 -11  13   8    1.40    1.90
 -12  13   9   -1.50    1.60
 -12 -12  14   -2.70    3.00
  12  12 -14    0.80    2.10
 -11 -12  13    0.70    2.80
  11  12 -13   -0.20    1.70
 -10 -12  12    4.10    3.50
  10  12 -12   -1.80    1.70
  -9 -12  11    7.70    4.10
   9  12 -11    7.00    2.20
  -8 -12  10   -3.50    3.10
   8  12 -10    0.90    1.60
  -7 -12   9   -3.40    3.00
   7  12  -9    0.10    1.60
  -6 -12   8    4.50    4.20
   6  12  -8    0.20    2.10
  -5 -12   7   -1.40    2.90
   5  12  -7   -1.20    1.00
  -4 -12   6   -0.80    3.10
   4  12  -6    1.70    1.30
  -3 -12   5    0.70    2.70
   3  12  -5   -0.10    0.90
  -2 -12   4    5.40    2.50
   2  12  -4    0.10    1.00
  -1 -12   3    0.50    1.70
   1  12  -3   -1.00    1.00
   0 -12   2   -0.30    1.40
   0  12  -2    0.80    1.00
   1 -12   1   21.20    3.40
  -1  12  -1   20.10    2.70
   2 -12   0    3.80    1.60
  -2  12   0    0.10    0.90
   3 -12  -1    1.20    1.30
  -3  12   1   -0.20    0.80
   4 -12  -2    5.20    1.80
  -4  12   2    9.40    1.60
   5 -12  -3    3.10    1.60
  -5  12   3    3.30    1.00
   6 -12  -4   -0.30    1.40
   7 -12  -5    2.60    2.60
   8 -12  -6    0.80    1.90
 -10  12   8   -1.70    1.30
 -11  12   9    2.20    1.90
 -12  12  10   -0.30    1.70
 -13  12  11   -0.40    1.80
 -13 -11  14   -0.30    3.20
  13  11 -14   -1.40    1.80
 -12 -11  13   -1.00    2.60
  12  11 -13    1.70    1.80
 -11 -11  12    1.20    2.80
  11  11 -12    0.40    1.80
 -10 -11  11    1.60    2.80
  10  11 -11    3.10    1.80
  -9 -11  10    4.50    3.10
   9  11 -10    6.10    2.00
  -8 -11   9   -3.30    3.10
   8  11  -9   -2.40    1.30
  -7 -11   8   -2.50    2.40
   7  11  -8    0.50    1.30
  -6 -11   7    2.80    3.40
   6  11  -7    3.80    1.50
  -5 -11   6    3.60    3.50
   5  11  -6    2.30    1.30
  -4 -11   5   -2.40    2.60
   4  11  -5    0.70    0.90
  -3 -11   4   -1.50    2.90
   3  11  -4    1.30    1.20
  -2 -11   3    7.50    2.70
   2  11  -3    9.70    1.90
  -1 -11   2   20.90    3.50
   1  11  -2   17.60    2.50
   0 -11   1    9.10    2.30
   0  11  -1   12.50    1.90
   1 -11   0    1.20    1.20
  -1  11   0   -0.90    0.60
   2 -11  -1    6.10    1.80
  -2  11   1    8.50    1.50
   3 -11  -2   13.00    2.60
  -3  11   2   11.30    1.80
   4 -11  -3    0.60    1.30
  -4  11   3   -1.30    0.60
   5 -11  -4   -2.20    1.00
  -5  11   4    0.30    0.70
   6 -11  -5    0.00    1.30
   7 -11  -6   -2.10    1.30
   8 -11  -7    2.80    2.70
  -9  11   8    1.70    1.50
 -10  11   9    0.70    1.60
 -11  11  10    1.10    1.80
 -12  11  11    0.00    1.70
 -13  11  12   -1.50    1.70
 -14 -10  14   -0.40    2.80
 -13 -10  13    0.40    2.30
  13  10 -13   -2.40    1.50
 -12 -10  12   -3.10    2.30
  12  10 -12   -0.60    1.50
 -11 -10  11   -2.10    2.30
  11  10 -11    1.50    1.60
 -10 -10  10    0.90    2.50
  10  10 -10   -3.70    1.10
  -9 -10   9    3.30    3.00
   9  10  -9    0.40    1.80
  -8 -10   8   -1.40    2.20
   8  10  -8    0.40    1.30
  -7 -10   7   -1.90    1.90
   7  10  -7   -0.60    0.90
  -6 -10   6    1.70    2.70
   6  10  -6    1.10    1.00
  -5 -10   5   11.20    3.70
   5  10  -5    8.60    1.90
  -4 -10   4   17.80    4.30
   4  10  -4   12.00    1.80
  -3 -10   3   18.50    4.20
   3  10  -3   12.10    2.00
  -2 -10   2    2.50    2.10
   2  10  -2    4.00    1.10
  -1 -10   1   11.60    2.60
   1  10  -1    7.90    1.50
   0 -10   0    1.30    1.40
   0  10   0    2.00    0.90
   1 -10  -1   14.10    2.60
  -1  10   1   21.00    2.30
   2 -10  -2   26.20    3.50
  -2  10   2   26.20    2.70
   3 -10  -3    4.70    1.60
  -3  10   3    7.00    1.30
   4 -10  -4    0.10    1.00
  -4  10   4    0.90    0.70
   5 -10  -5    7.00    2.10
  -5  10   5    6.20    1.20
   6 -10  -6   -0.70    1.10
   7 -10  -7    2.40    1.60
   8 -10  -8    0.70    1.50
  -9  10   9    6.60    2.30
 -10  10  10    1.30    1.60
 -11  10  11    1.90    1.90
 -12  10  12    0.50    1.80
 -13  10  13    2.80    2.10
 -14  -9  13    0.50    2.50
  14   9 -13    0.20    1.90
 -13  -9  12    0.40    2.30
  13   9 -12    5.80    2.00
 -12  -9  11   -1.10    2.30
  12   9 -11    1.60    1.50
 -11  -9  10    2.20    2.40
  11   9 -10   -1.00    1.20
 -10  -9   9    3.60    2.80
  10   9  -9    3.70    1.90
  -9  -9   8    0.00    2.10
   9   9  -8   -0.30    1.00
  -8  -9   7    6.70    2.90
   8   9  -7    6.80    1.50
  -7  -9   6   -1.30    1.80
   7   9  -6   -0.80    0.90
  -6  -9   5    0.30    1.90
   6   9  -5    0.50    0.90
  -5  -9   4    9.90    3.40
   5   9  -4    9.70    1.60
  -4  -9   3    7.30    3.40
   4   9  -3   10.40    1.80
  -3  -9   2   10.90    3.30
   3   9  -2    6.90    1.40
  -2  -9   1    6.70    2.30
   2   9  -1    4.10    1.00
  -1  -9   0    0.50    1.30
   1   9   0   -0.40    0.60
   0  -9  -1   39.10    4.20
   0   9   1   38.10    3.60
   1  -9  -2    1.10    1.20
  -1   9   2    1.20    0.70
   2  -9  -3   78.69    6.80
  -2   9   3   73.59    6.20
   3  -9  -4    8.00    1.90
  -3   9   4    7.40    1.20
   4  -9  -5   16.60    2.60
  -4   9   5   16.30    1.90
   5  -9  -6    1.50    1.20
  -5   9   6    2.70    0.70
   6  -9  -7    3.40    1.80
   7  -9  -8    2.70    1.50
  -9   9  10    2.70    1.60
 -10   9  11   -0.20    1.30
 -11   9  12    2.60    1.90
 -12   9  13    0.10    1.70
 -13   9  14   -1.00    1.40
 -14   9  15   -0.30    1.80
 -15  -8  13    2.90    3.60
 -15  -8  13   -0.50    2.10
 -14  -8  12    0.60    2.40
 -14  -8  12   -1.40    3.20
  14   8 -12    5.80    2.80
 -13  -8  11   -0.60    2.00
  13   8 -11   -2.50    1.70
 -12  -8  10    3.80    2.50
  12   8 -10    5.30    1.70
 -11  -8   9    2.00    2.60
  11   8  -9    0.00    1.50
 -10  -8   8   -0.70    1.50
  10   8  -8   -0.50    1.20
  -9  -8   7    0.10    1.60
   9   8  -7    0.70    1.00
  -8  -8   6    8.60    3.00
   8   8  -6   11.20    1.90
  -7  -8   5    3.60    2.10
   7   8  -5    4.80    1.20
  -6  -8   4   14.80    3.40
   6   8  -4   12.80    1.90
  -5  -8   3  220.88   19.10
   5   8  -3  224.88   17.50
  -4  -8   2    0.60    2.40
   4   8  -2    2.30    0.90
  -3  -8   1  216.38   17.50
   3   8  -1  193.08   15.70
  -2  -8   0   49.00    6.60
   2   8   0   49.70    4.40
  -1  -8  -1   29.00    4.20
   1   8   1   26.40    2.80
   0  -8  -2    0.50    2.00
   0   8   2    1.70    0.90
   1  -8  -3   27.60    3.80
  -1   8   3   32.20    3.00
   2  -8  -4   29.30    3.30
  -2   8   4   28.40    2.70
   3  -8  -5    0.30    1.00
  -3   8   5   -0.40    0.50
   4  -8  -6   48.30    5.00
  -4   8   6   54.29    4.30
   5  -8  -7   11.80    2.30
  -5   8   7   17.30    1.60
   6  -8  -8    1.30    1.20
   7  -8  -9    8.30    2.30
  -8   8  10   -0.70    1.20
  -9   8  11    2.20    1.50
 -10   8  12    3.20    2.00
 -11   8  13    3.20    1.90
 -12   8  14   -2.00    1.20
 -13   8  15    0.60    1.70
 -14   8  16    1.70    2.10
 -16  -7  13    4.10    4.20
 -15  -7  12    3.30    3.90
 -15  -7  12   -1.20    2.30
 -14  -7  11    0.30    3.60
 -14  -7  11    4.20    2.90
 -13  -7  10    1.20    2.10
  13   7 -10   -2.90    1.20
 -12  -7   9   -0.20    2.10
  12   7  -9    3.30    1.50
 -11  -7   8    2.50    2.00
  11   7  -8   -0.10    1.20
 -10  -7   7    2.20    1.70
  10   7  -7    4.00    1.30
  -9  -7   6    0.80    1.70
   9   7  -6    2.70    1.10
  -8  -7   5   -0.90    1.20
   8   7  -5   -0.90    0.70
  -7  -7   4    0.90    1.70
   7   7  -4    0.80    0.80
  -6  -7   3   -0.80    1.50
   6   7  -3   -0.20    0.70
  -5  -7   2   61.89    7.60
   5   7  -2   78.39    6.10
  -4  -7   1   56.09    6.80
   4   7  -1   47.70    4.40
  -3  -7   0    1.70    2.10
   3   7   0   -0.20    0.60
  -2  -7  -1   19.00    3.30
   2   7   1   11.30    1.60
  -1  -7  -2  171.68   14.10
   1   7   2  173.58   13.40
   0  -7  -3    2.70    1.30
   0   7   3    1.80    0.60
   1  -7  -4    5.30    1.40
  -1   7   4    6.00    1.00
   2  -7  -5   -1.20    0.70
  -2   7   5    0.50    0.50
   3  -7  -6   14.70    2.60
  -3   7   6   13.70    1.60
   4  -7  -7   23.90    3.40
  -4   7   7   29.50    2.50
   5  -7  -8   38.10    4.30
  -5   7   8   44.80    3.50
   6  -7  -9    4.80    1.60
  -6   7   9    4.90    0.90
  -8   7  11   10.60    2.40
  -9   7  12   -0.40    1.20
 -10   7  13    0.20    1.50
 -11   7  14    4.00    2.10
 -12   7  15    0.70    1.40
 -13   7  16    1.50    1.60
 -14   7  17    0.60    1.70
 -16  -6  12    0.80    2.40
 -16  -6  12    0.80    3.80
 -15  -6  11    1.40    3.70
 -15  -6  11    0.40    1.80
 -14  -6  10   10.00    4.40
 -14  -6  10    2.20    2.10
 -13  -6   9    5.90    4.10
 -13  -6   9    5.70    2.80
  13   6  -9    9.80    2.00
 -12  -6   8    2.70    2.00
 -12  -6   8    3.30    3.30
  12   6  -8   -0.80    1.80
 -11  -6   7   -0.30    1.50
  11   6  -7   -0.40    0.90
 -10  -6   6   -1.70    1.20
  10   6  -6    0.50    1.00
  -9  -6   5    1.50    1.40
   9   6  -5    0.80    0.90
  -8  -6   4    3.90    1.90
   8   6  -4    3.10    0.90
  -7  -6   3    3.20    1.90
   7   6  -3    0.50    0.80
  -6  -6   2    0.30    1.70
   6   6  -2    0.50    0.70
  -5  -6   1    0.70    1.70
   5   6  -1    1.40    0.80
  -4  -6   0   76.19    7.70
   4   6   0   78.09    6.30
  -3  -6  -1   77.09    7.40
   3   6   1   68.79    5.80
  -2  -6  -2   17.30    3.30
   2   6   2   23.80    2.20
  -1  -6  -3  140.39   11.50
   1   6   3  138.69   10.90
   0  -6  -4   68.89    5.90
   0   6   4   65.29    5.40
   1  -6  -5    2.60    1.10
  -1   6   5    3.60    0.70
   2  -6  -6   12.90    2.00
  -2   6   6   10.20    1.30
   3  -6  -7   41.00    4.00
  -3   6   7   43.50    3.50
   4  -6  -8  260.67   20.00
  -4   6   8  246.28   19.20
   5  -6  -9    0.40    1.20
  -5   6   9    3.80    0.60
   6  -6 -10    2.40    1.30
  -7   6  11    1.00    1.10
  -8   6  12   12.60    2.50
  -9   6  13    0.70    1.20
 -10   6  14   16.40    3.20
 -11   6  15   14.70    2.90
 -12   6  16   -0.40    1.20
 -13   6  17   -1.20    1.10
 -14   6  18    0.50    1.70
 -16  -5  11   -0.60    1.80
 -15  -5  10   -1.30    1.90
 -14  -5   9    2.60    3.60
 -14  -5   9    0.20    1.70
 -13  -5   8    7.50    3.90
 -13  -5   8    4.70    2.20
  13   5  -8    5.50    1.70
 -12  -5   7    0.90    1.60
 -12  -5   7    4.50    3.20
  12   5  -7    0.80    1.10
 -11  -5   6    9.40    2.70
 -11  -5   6    4.20    3.30
  11   5  -6   12.30    1.90
 -10  -5   5    4.60    2.00
  10   5  -5    6.40    1.50
  -9  -5   4    3.70    1.70
   9   5  -4    0.90    0.80
  -8  -5   3    4.70    2.00
   8   5  -3    5.60    1.20
  -7  -5   2   37.20    5.20
   7   5  -2   41.00    3.60
  -6  -5   1    4.20    2.00
   6   5  -1    4.80    1.10
  -5  -5   0    1.00    1.50
   5   5   0    0.20    0.60
  -4  -5  -1    7.50    2.50
   4   5   1   11.60    1.50
  -3  -5  -2   41.90    4.80
   3   5   2   39.30    3.50
  -2  -5  -3  258.17   20.10
   2   5   3  247.48   19.30
  -1  -5  -4   16.80    2.40
   1   5   4   18.50    1.80
   0  -5  -5   56.59    5.00
   0   5   5   55.69    4.50
   1  -5  -6   35.50    3.60
  -1   5   6   39.50    3.20
   2  -5  -7   31.60    3.10
  -2   5   7   29.70    2.60
   3  -5  -8    8.80    1.70
  -3   5   8    8.70    1.00
   4  -5  -9   42.80    4.50
  -4   5   9   46.20    3.60
   5  -5 -10    1.70    1.00
  -5   5  10    0.60    0.30
  -6   5  11   17.20    2.70
  -7   5  12   32.10    3.80
  -8   5  13    7.90    2.00
  -9   5  14    0.70    1.30
 -10   5  15   13.40    2.90
 -11   5  16    2.20    1.70
 -12   5  17    1.20    1.50
 -13   5  18    2.00    1.70
 -14   5  19   -1.20    1.50
 -17  -4  11   -2.00    2.00
 -16  -4  10    0.10    1.90
 -15  -4   9   -1.40    1.50
 -14  -4   8   -0.30    1.50
 -13  -4   7   -1.10    1.60
 -13  -4   7   -1.80    2.90
  13   4  -7   -1.10    1.70
 -12  -4   6    4.80    2.00
 -12  -4   6    6.20    3.30
  12   4  -6    6.10    1.50
 -11  -4   5    3.80    2.60
 -11  -4   5    0.40    1.40
  11   4  -5   -0.20    0.90
 -10  -4   4    1.30    1.40
 -10  -4   4    0.40    2.10
  10   4  -4   -0.70    0.70
  -9  -4   3   36.70    5.30
  -9  -4   3   22.00    3.70
   9   4  -3   22.50    2.60
  -8  -4   2    8.30    2.10
   8   4  -2   14.20    1.70
  -7  -4   1   30.00    4.20
   7   4  -1   32.20    3.20
  -6  -4   0  259.57   21.10
   6   4   0  264.57   20.20
  -5  -4  -1   60.89    5.80
   5   4   1   55.39    4.70
  -4  -4  -2  170.38   15.80
   4   4   2  207.28   14.80
  -3  -4  -3  417.46   33.90
   3   4   3  447.66   32.90
  -2  -4  -4   29.60    3.30
   2   4   4   26.70    2.50
  -1  -4  -5  178.28   14.10
   1   4   5  179.18   13.70
   0  -4  -6   18.80    2.20
   0   4   6   22.40    1.90
   1  -4  -7   18.30    2.60
  -1   4   7   24.90    2.00
   2  -4  -8    1.80    0.80
  -2   4   8    1.60    0.50
   3  -4  -9   74.49    6.80
  -3   4   9   84.99    6.30
   4  -4 -10  202.68   15.40
  -4   4  10  185.48   14.60
  -5   4  11    3.60    0.60
  -6   4  12   22.80    3.00
  -6   4  12   20.90    1.80
  -7   4  13   14.20    2.60
  -8   4  14    0.30    1.10
  -9   4  15    3.80    1.70
 -10   4  16    0.50    1.30
 -11   4  17    4.70    2.00
 -12   4  18    1.60    1.60
 -13   4  19    3.80    1.90
 -14   4  20    2.00    2.00
 -17  -3  10    1.40    2.20
 -16  -3   9    0.30    1.70
 -15  -3   8   -1.70    1.40
 -14  -3   7    1.40    1.70
 -13  -3   6    1.10    1.70
  13   3  -6    0.60    1.40
 -12  -3   5   -1.10    1.20
  12   3  -5   -0.80    0.90
 -11  -3   4   -2.00    1.10
  11   3  -4    0.20    1.00
 -10  -3   3    4.60    1.80
 -10  -3   3    6.90    2.80
  10   3  -3   10.00    1.50
  -9  -3   2    9.00    2.90
  -9  -3   2   13.90    2.50
   9   3  -2   11.30    1.60
  -8  -3   1    1.00    1.40
  -8  -3   1    3.60    2.10
   8   3  -1    0.90    0.70
  -7  -3   0   -0.40    1.40
  -7  -3   0   -0.50    0.90
   7   3   0   -0.10    0.60
  -6  -3  -1    0.80    1.30
  -6  -3  -1    6.60    1.90
   6   3   1    2.90    0.80
  -5  -3  -2   46.00    4.50
   5   3   2   38.80    3.50
  -4  -3  -3   85.39    8.50
   4   3   3  103.89    7.70
  -3  -3  -4  117.89   10.70
   3   3   4  132.79    9.90
  -2  -3  -5  180.18   13.20
   2   3   5  150.88   12.60
  -1  -3  -6   90.89    7.30
   1   3   6   85.99    6.90
   0  -3  -7    0.40    0.60
   0   3   7    1.10    0.40
   1  -3  -8  280.17   21.60
  -1   3   8  281.47   21.30
   2  -3  -9   12.20    1.80
  -2   3   9   14.60    1.30
   3  -3 -10   54.49    4.90
  -3   3  10   53.69    4.30
  -4   3  11  109.69    8.50
  -5   3  12  126.99    9.20
  -5   3  12  106.89    9.90
  -6   3  13    1.60    0.40
  -6   3  13    2.80    1.20
  -7   3  14   41.90    4.30
  -7   3  14   39.40    3.30
  -8   3  15   15.70    2.80
  -9   3  16    8.60    2.10
 -10   3  17    0.90    1.40
 -11   3  18    3.40    1.70
 -12   3  19   -1.50    1.10
 -13   3  20   -0.90    1.50
 -14   3  21    1.60    1.70
 -17  -2   9   -1.90    1.70
 -16  -2   8    0.20    1.70
 -15  -2   7   -1.00    1.50
 -14  -2   6    2.00    1.90
 -13  -2   5    2.90    1.80
 -12  -2   4   -1.00    1.20
  12   2  -4    2.00    1.10
 -11  -2   3   -0.10    1.20
  11   2  -3    1.90    1.00
 -10  -2   2   24.00    3.40
  10   2  -2   25.60    2.50
  -9  -2   1    3.70    1.40
   9   2  -1    2.70    0.90
  -8  -2   0    0.00    1.30
   8   2   0   -0.10    0.90
  -7  -2  -1    0.20    1.00
   7   2   1    0.50    0.60
  -6  -2  -2   13.00    2.20
   6   2   2    7.80    1.20
  -5  -2  -3   10.90    2.00
   5   2   3    9.60    1.30
  -4  -2  -4   41.00    4.60
   4   2   4   44.40    3.60
  -3  -2  -5   19.00    2.90
   3   2   5   16.30    1.70
  -2  -2  -6   41.90    4.10
   2   2   6   49.20    3.80
  -1  -2  -7   15.50    1.80
   1   2   7   12.00    1.30
   0  -2  -8  146.29   11.20
   0   2   8  138.79   11.00
   1  -2  -9   30.40    2.90
  -1   2   9   32.90    2.70
   2  -2 -10   14.00    1.90
  -2   2  10   14.00    1.40
   3  -2 -11    2.70    0.90
  -3   2  11    1.30    0.40
  -4   2  12    0.60    1.30
  -4   2  12    1.00    0.80
  -4   2  12    2.70    0.60
  -5   2  13   58.69    6.10
  -5   2  13   58.59    5.20
  -5   2  13   52.49    4.40
  -6   2  14    2.20    1.60
  -6   2  14    1.90    0.50
  -6   2  14    1.90    1.00
  -7   2  15   10.20    1.20
  -7   2  15    7.90    1.90
  -7   2  15   10.20    2.90
  -8   2  16    6.20    1.80
  -8   2  16    2.80    2.10
  -9   2  17   -0.70    1.10
 -10   2  18   -0.40    1.00
 -11   2  19    0.80    1.20
 -12   2  20    0.30    1.40
 -13   2  21    0.20    1.50
 -14   2  22    4.10    2.00
 -17  -1   8    2.40    2.10
 -16  -1   7   -1.20    1.70
 -15  -1   6    2.10    2.00
 -14  -1   5    0.90    1.90
 -13  -1   4    3.80    1.70
 -12  -1   3    5.00    1.60
  12   1  -3    3.80    1.20
 -11  -1   2   14.00    2.70
  11   1  -2   17.20    2.00
 -10  -1   1   12.20    2.30
  10   1  -1   15.90    1.80
  -9  -1   0    0.90    1.00
   9   1   0    0.60    0.60
  -8  -1  -1   20.60    2.90
   8   1   1   15.70    2.10
  -7  -1  -2   89.49    7.60
   7   1   2   87.49    7.00
  -6  -1  -3   97.59    7.90
   6   1   3   88.19    7.30
  -5  -1  -4    6.10    1.60
   5   1   4    5.60    0.90
  -4  -1  -5   62.39    5.90
   4   1   5   63.69    5.10
   3   1   6   52.09    4.20
  -2  -1  -7    0.40    0.70
   2   1   7    0.70    0.50
  -1  -1  -8   59.49    5.00
   1   1   8   62.89    4.90
   0  -1  -9  147.79   11.30
   0   1   9  142.59   11.20
   1  -1 -10  180.48   14.50
  -1   1  10  192.58   14.30
  -2   1  11   22.30    2.00
  -3   1  12   56.39    5.30
  -3   1  12   64.39    4.90
  -4   1  13    0.30    0.80
  -4   1  13    1.00    0.50
  -5   1  14   15.10    2.40
  -5   1  14   16.70    1.60
  -6   1  15    7.30    1.10
  -6   1  15   10.10    1.90
  -7   1  16   23.80    2.30
  -7   1  16   26.70    5.00
  -7   1  16   27.50    3.60
  -8   1  17    1.60    1.30
  -8   1  17    3.80    2.30
  -9   1  18    0.90    2.00
  -9   1  18   -0.30    1.00
 -10   1  19   10.50    2.50
 -10   1  19   12.10    3.80
 -11   1  20    1.80    1.50
 -12   1  21    7.50    2.40
 -13   1  22    0.40    1.40
 -14   1  23    0.40    1.60
 -18   0   8    1.10    2.10
 -17   0   7   -1.10    1.80
 -16   0   6    1.10    1.90
 -15   0   5    2.50    1.90
 -14   0   4    5.30    2.40
 -13   0   3    1.90    1.40
 -12   0   2   -0.20    1.10
  12   0  -2   -0.40    0.90
 -11   0   1   10.50    2.20
  11   0  -1   11.90    1.60
 -10   0   0    2.10    1.10
  10   0   0    2.00    0.80
  -9   0  -1   36.50    3.80
   9   0   1   35.60    3.20
  -8   0  -2    0.40    1.00
   8   0   2    1.60    1.00
  -7   0  -3    2.70    1.00
   7   0   3    1.60    0.60
  -6   0  -4   60.49    5.30
   6   0   4   60.39    4.90
  -5   0  -5   61.09    5.30
   5   0   5   58.19    4.80
  -4   0  -6   24.10    3.00
   4   0   6   24.30    2.20
  -3   0  -7   -0.40    0.90
   3   0   7    0.10    0.40
  -2   0  -8  139.99   10.50
   2   0   8  130.99   10.50
  -1   0  -9  144.29   10.90
   1   0   9  138.49   10.90
   0   0 -10    0.20    0.50
   0   0  10   -0.10    0.30
  -1   0  11  386.76   29.60
  -1   0  11  395.36   29.80
  -2   0  12    5.00    0.80
  -2   0  12    4.20    1.00
  -3   0  13  117.79    9.20
  -3   0  13  106.99    8.70
  -4   0  14   17.70    1.90
  -4   0  14   22.20    2.50
  -5   0  15   46.80    4.40
  -5   0  15   45.60    3.90
  -6   0  16    1.40    1.00
  -6   0  16    0.70    0.50
  -7   0  17   31.10    3.40
  -7   0  17   28.40    2.60
  -7   0  17   20.20    4.10
  -8   0  18    0.70    0.60
  -8   0  18    0.40    1.00
  -9   0  19    0.70    2.20
  -9   0  19    3.50    1.70
 -10   0  20    4.20    3.00
 -10   0  20    6.30    2.00
 -11   0  21    3.60    1.80
 -11   0  21    3.70    2.90
 -12   0  22    1.50    1.50
 -12   0  22    0.00    2.60
 -13   0  23   -0.10    1.50
 -14   0  24    1.50    1.90
 -18   1   7    4.30    2.60
 -17   1   6   -1.30    1.80
 -16   1   5    2.70    2.20
 -15   1   4   -0.30    1.20
 -14   1   3    1.90    1.70
 -13   1   2    2.50    1.50
 -12   1   1    2.20    1.30
 -11   1   0   -1.40    0.70
  11  -1   0    1.30    0.70
 -10   1  -1    8.00    1.80
  10  -1   1   10.10    1.30
  -9   1  -2   17.70    2.40
   9  -1   2   13.80    1.70
  -8   1  -3   54.29    5.10
   8  -1   3   58.69    4.80
  -7   1  -4    6.00    1.30
   7  -1   4    6.60    1.10
  -6   1  -5   35.00    3.20
   6  -1   5   31.50    2.90
  -5   1  -6    2.10    0.90
   5  -1   6    1.70    0.60
  -4   1  -7  135.89   11.30
   4  -1   7  149.79   11.10
  -3   1  -8  112.19    8.90
   3  -1   8  120.19    9.00
  -2   1  -9    1.70    0.40
   2  -1   9    0.40    0.50
  -1   1 -10  181.48   14.40
   1  -1  10  196.38   14.50
   0  -1  11  394.16   29.50
   0  -1  11  381.26   29.40
  -1  -1  12   57.09    4.80
  -1  -1  12   56.39    4.70
  -2  -1  13   68.09    5.30
  -2  -1  13   60.99    5.40
  -3  -1  14    4.80    1.10
  -3  -1  14    2.20    0.70
  -4  -1  15   21.20    2.50
  -5  -1  16    5.10    1.30
  -6  -1  17   20.40    2.90
  -7  -1  18    3.40    1.30
  -7  -1  18    1.90    2.10
  -8  -1  19    0.70    0.90
  -9  -1  20   12.80    2.60
 -10  -1  21   14.00    4.20
 -10  -1  21    8.90    2.40
 -11  -1  22    2.70    2.70
 -11  -1  22    0.70    1.50
 -12  -1  23   -1.60    2.40
 -12  -1  23    2.10    1.80
 -13  -1  24    1.60    3.20
 -13  -1  24    0.70    1.70
 -18   2   6   -3.10    1.90
 -17   2   5   -0.30    1.80
 -16   2   4    1.80    1.90
 -15   2   3    0.60    1.70
 -14   2   2    9.50    2.60
 -13   2   1    3.20    1.60
 -12   2   0   13.90    2.60
 -11   2  -1    0.20    0.90
  11  -2   1   -0.30    0.60
 -10   2  -2    4.70    1.30
  10  -2   2    3.10    0.80
  -9   2  -3   16.50    2.20
   9  -2   3   12.70    1.60
  -8   2  -4   16.20    2.30
   8  -2   4   18.40    2.00
  -7   2  -5   61.29    4.80
   7  -2   5   48.20    4.50
  -6   2  -6   31.30    2.70
   6  -2   6   25.00    2.50
  -5   2  -7   57.69    5.20
   5  -2   7   68.29    5.10
  -4   2  -8  237.38   18.00
   4  -2   8  230.78   17.90
  -3   2  -9   18.40    1.60
   3  -2   9   20.10    1.70
   3  -2   9   23.80    2.00
   2  -2  10   13.00    1.50
   2  -2  10   13.60    1.20
   1  -2  11    8.60    1.10
   1  -2  11    7.60    1.00
   0  -2  12    4.40    0.90
   0  -2  12    3.70    0.80
  -1  -2  13  188.98   14.30
  -1  -2  13  180.28   14.30
  -2  -2  14   22.70    2.40
   3   2 -15   54.89    4.70
  -3  -2  15   52.89    4.90
   4   2 -16    1.70    0.80
  -4  -2  16    1.90    1.00
   5   2 -17    0.90    0.80
  -5  -2  17    1.40    0.90
   6   2 -18   -0.20    0.70
  -6  -2  18    1.00    1.00
  -6  -2  18   -0.40    1.80
   7   2 -19    1.60    0.90
  -7  -2  19    1.80    2.30
  -7  -2  19    0.50    1.00
   8   2 -20    1.20    0.90
  -8  -2  20    1.20    1.20
  -9  -2  21    0.80    1.40
 -10  -2  22   -1.70    1.20
 -11  -2  23    2.40    1.60
 -12  -2  24    0.10    1.50
 -12  -2  24    0.50    2.60
 -13  -2  25    0.30    1.50
 -13  -2  25   -0.30    3.10
 -18   3   5    2.60    2.40
 -17   3   4    7.00    2.50
 -16   3   3    4.30    2.20
 -15   3   2   -0.50    1.40
 -14   3   1    9.10    2.50
 -13   3   0   -1.60    1.00
 -12   3  -1   -0.20    1.10
 -11   3  -2    1.70    1.20
  11  -3   2    1.90    0.90
 -10   3  -3   11.10    2.10
  10  -3   3   13.30    1.60
  -9   3  -4   10.80    1.90
   9  -3   4   14.40    1.60
  -8   3  -5    6.40    1.20
   8  -3   5    4.90    1.00
  -7   3  -6    2.90    1.10
   7  -3   6    1.90    1.10
  -6   3  -7   72.69    5.90
   6  -3   7   74.99    6.00
  -5   3  -8   14.00    1.50
   5  -3   8    9.40    1.40
   4  -3   9    2.70    0.80
   3  -3  10   49.80    4.20
   2  -3  11   11.80    1.50
   2  -3  11   11.10    1.10
   2  -3  11    9.90    1.00
   1  -3  12    4.50    0.80
   1  -3  12    6.60    1.00
   0  -3  13  118.09    9.30
   1   3 -14    5.60    1.10
  -1  -3  14    4.90    1.00
   2   3 -15   22.10    2.50
  -2  -3  15   23.10    2.50
   3   3 -16    3.70    1.10
  -3  -3  16    6.70    1.40
   4   3 -17    8.40    1.60
  -4  -3  17   15.50    2.20
   5   3 -18    2.70    1.00
  -5  -3  18    5.10    1.30
   6   3 -19   -1.20    0.80
  -6  -3  19    0.70    1.10
  -6  -3  19    0.90    2.30
   7   3 -20   16.10    2.20
  -7  -3  20   18.00    4.90
  -7  -3  20   16.80    2.80
   8   3 -21    7.30    1.60
  -8  -3  21    6.50    2.00
  -9  -3  22    1.20    1.40
 -10  -3  23    1.50    1.70
 -11  -3  24    2.60    1.90
 -12  -3  25    3.70    2.00
 -13  -3  26    2.90    3.30
 -17   4   3    2.30    2.10
 -16   4   2    0.60    1.60
 -15   4   1    5.70    2.00
 -14   4   0   23.50    3.60
 -13   4  -1   -0.40    1.20
 -12   4  -2    8.10    1.90
 -11   4  -3    4.10    1.40
  11  -4   3    4.40    1.00
 -10   4  -4   18.90    2.40
  10  -4   4   11.70    1.70
  -9   4  -5    3.90    1.10
   9  -4   5    3.50    0.90
  -8   4  -6    0.30    0.60
   8  -4   6   -0.60    0.50
  -7   4  -7   40.90    3.60
   7  -4   7   41.80    3.60
  -6   4  -8   28.40    2.60
   6  -4   8   29.00    2.90
   5  -4   9   92.69    7.50
   4  -4  10  168.78   13.20
   3  -4  11   18.60    2.10
   2  -4  12   10.30    1.30
   2  -4  12   15.00    1.80
   1  -4  13   79.09    6.30
   0   4 -14   22.50    2.70
   0  -4  14   18.30    2.00
   1   4 -15    2.10    0.90
  -1  -4  15    0.80    0.70
   2   4 -16    7.60    1.40
  -2  -4  16    7.20    1.40
   3   4 -17    2.50    0.90
  -3  -4  17    3.20    1.10
   4   4 -18    1.60    0.90
  -4  -4  18    3.40    1.20
   5   4 -19    2.20    1.20
  -5  -4  19    4.10    1.40
  -5  -4  19    1.20    2.50
   6   4 -20   11.50    1.90
  -6  -4  20   11.00    4.10
  -6  -4  20   11.30    2.40
   7   4 -21    9.60    1.80
  -7  -4  21    6.20    3.50
  -7  -4  21   10.70    2.40
   8   4 -22   36.40    4.10
  -8  -4  22   34.30    4.70
   9   4 -23    9.70    1.90
  -9  -4  23    9.40    2.60
 -10  -4  24    4.00    2.00
 -11  -4  25   -0.60    1.20
 -12  -4  26   -0.30    1.60
 -16   5   1    3.00    2.70
 -15   5   0    0.80    1.40
 -14   5  -1    2.70    1.60
 -13   5  -2    2.50    1.50
 -12   5  -3   -0.90    0.90
 -11   5  -4    5.90    1.50
  11  -5   4    3.10    1.20
 -10   5  -5    9.90    1.70
  10  -5   5    6.20    1.30
  -9   5  -6    0.80    0.70
   9  -5   6    0.60    0.70
  -8   5  -7    0.80    0.60
   8  -5   7    0.00    0.60
  -7   5  -8    1.50    0.60
   7  -5   8    1.30    0.70
  -6   5  -9    3.90    0.70
   6  -5   9    3.20    0.90
   5  -5  10    0.70    0.70
   4  -5  11   17.40    2.10
   3  -5  12    0.60    0.90
   2  -5  13   -1.80    0.70
  -1   5 -14    8.50    1.50
   1  -5  14    6.50    1.20
   0   5 -15   43.10    4.00
   0  -5  15   45.40    4.00
   1   5 -16    7.70    1.40
  -1  -5  16   10.60    1.60
   2   5 -17   15.40    2.10
  -2  -5  17   15.80    2.20
   3   5 -18   10.30    1.80
  -3  -5  18   10.70    1.90
   4   5 -19    4.50    1.40
  -4  -5  19    4.90    1.50
   5   5 -20    1.30    1.10
  -5  -5  20    2.50    1.20
  -5  -5  20    1.70    2.70
   6   5 -21    2.00    1.20
  -6  -5  21    2.00    1.30
  -6  -5  21   -0.30    2.60
   7   5 -22    2.70    1.70
  -7  -5  22    0.30    2.70
  -7  -5  22    2.70    1.50
   8   5 -23    0.50    1.20
  -8  -5  23   -0.80    1.20
   9   5 -24    0.00    1.20
  -9  -5  24    0.40    1.50
 -10  -5  25    0.80    1.70
 -11  -5  26   -0.90    1.70
 -11   6  -5   13.00    3.10
 -10   6  -6    1.00    0.90
  10  -6   6    4.40    1.00
  -9   6  -7    2.40    0.90
   9  -6   7    0.90    0.80
  -8   6  -8   -0.10    0.50
   8  -6   8   -0.60    0.60
  -7   6  -9    2.90    0.70
   7  -6   9    3.90    1.00
  -6   6 -10    3.20    0.50
   6  -6  10    2.80    0.90
   5  -6  11    9.40    1.50
   4  -6  12   14.50    2.00
   3  -6  13    9.90    1.60
  -2   6 -14    0.60    0.80
   2  -6  14   -1.30    0.80
  -1   6 -15   24.60    2.80
   1  -6  15   22.70    2.60
   0   6 -16    1.90    0.90
   0  -6  16    0.90    0.80
   1   6 -17   19.60    2.70
  -1  -6  17   29.80    2.90
   2   6 -18    1.00    0.90
  -2  -6  18    2.40    1.00
   3   6 -19   16.00    2.20
  -3  -6  19   12.30    2.20
   4   6 -20   -0.30    0.90
  -4  -6  20    1.30    1.10
  -4  -6  20    0.10    2.50
   5   6 -21    7.00    1.60
  -5  -6  21    3.70    1.50
  -5  -6  21    2.30    3.30
   6   6 -22    4.00    1.70
  -6  -6  22    1.40    3.40
  -6  -6  22    2.30    1.50
   7   6 -23   -0.10    1.20
  -7  -6  23   -1.10    1.10
   8   6 -24   -0.80    1.10
  -8  -6  24   -0.40    1.20
   9   6 -25    3.20    1.50
  -9  -6  25    0.10    1.60
 -10  -6  26    0.50    1.70
 -11  -6  27    5.30    2.50
  10  -7   7    1.10    0.80
   9  -7   8    2.10    0.90
   8  -7   9    1.60    1.00
   7  -7  10    1.40    0.80
   6  -7  11    6.60    1.30
   5  -7  12   24.30    2.80
   4  -7  13    7.20    1.50
  -2   7 -15   12.40    1.90
  -1   7 -16    1.80    1.10
   1  -7  16   -0.40    1.10
   0   7 -17   22.80    2.80
   0  -7  17   25.80    3.30
   1   7 -18   -0.70    1.00
  -1  -7  18   -1.30    0.80
   2   7 -19    7.20    1.60
  -2  -7  19    7.00    1.70
   3   7 -20   31.70    3.60
  -3  -7  20   25.40    6.30
  -3  -7  20   29.90    3.50
   4   7 -21   24.20    3.10
  -4  -7  21   42.40    8.20
  -4  -7  21   20.40    3.30
   5   7 -22   13.00    2.60
  -5  -7  22   16.80    3.00
  -5  -7  22   14.70    5.70
   6   7 -23    1.20    1.40
  -6  -7  23    3.20    1.70
  -6  -7  23    1.30    3.10
   7   7 -24   -0.40    1.20
  -7  -7  24   -0.90    1.20
   8   7 -25    1.20    1.70
  -8  -7  25   -0.20    1.50
   9   7 -26   -1.70    1.20
  -9  -7  26   -1.00    1.40
 -10  -7  27   -0.70    1.70
  10  -8   8   -0.90    0.80
   9  -8   9    1.80    1.00
   8  -8  10    0.50    0.80
   7  -8  11    3.80    1.20
   6  -8  12    1.90    1.10
   5  -8  13    4.00    1.20
   4  -8  14   -0.60    0.80
  -3   8 -15    2.90    1.30
  -2   8 -16    1.40    1.20
  -1   8 -17    1.00    0.90
   0   8 -18   -0.20    0.90
   1   8 -19    1.60    1.10
   2   8 -20    0.90    1.10
  -2  -8  20    1.70    2.60
   3   8 -21    1.00    1.30
  -3  -8  21    5.10    4.10
   4   8 -22   -0.80    1.60
  -4  -8  22   -3.50    2.60
  -4  -8  22    0.20    1.30
   5   8 -23    0.70    1.30
  -5  -8  23    1.40    1.60
  -5  -8  23    1.70    3.30
   6   8 -24    1.50    1.40
  -6  -8  24   -1.20    1.20
   7   8 -25   -1.70    1.30
  -7  -8  25    2.80    1.70
   8   8 -26    1.80    1.60
  -8  -8  26   -1.30    1.40
   9   8 -27   -0.60    1.80
  -9  -8  27    2.30    2.00
  10  -9   9    3.00    1.80
   9  -9  10    1.70    1.00
   8  -9  11    0.30    0.90
   7  -9  12   -0.80    0.90
   6  -9  13    8.40    1.70
   5  -9  14    1.30    1.00
  -3   9 -16   15.70    2.40
  -2   9 -17    3.70    1.40
  -1   9 -18    7.10    1.70
   0   9 -19    2.40    1.40
   1   9 -20    5.00    1.70
  -1  -9  20    1.50    3.30
   2   9 -21   -0.90    1.80
  -2  -9  21    0.60    3.00
   3   9 -22   -0.80    1.30
  -3  -9  22    2.50    3.40
   4   9 -23    1.20    1.50
  -4  -9  23   -1.10    2.90
   5   9 -24    0.20    1.50
   6   9 -25   -0.50    1.50
   7   9 -26   -0.50    1.60
   8   9 -27    1.40    2.10
   9 -10  11   12.10    2.10
   8 -10  12   20.60    2.90
   7 -10  13    3.00    1.30
   6 -10  14   11.10    2.00
   5 -10  15    9.10    1.90
  -3  10 -17    1.70    1.40
  -2  10 -18    0.20    1.20
  -1  10 -19    1.20    1.50
   1 -10  19    9.30    4.90
   0  10 -20    6.20    2.30
   0 -10  20   14.20    6.00
   1  10 -21   13.70    2.40
  -1 -10  21    4.50    4.60
   2  10 -22   -1.80    1.20
  -2 -10  22   -4.70    2.70
   3  10 -23    1.30    1.60
  -3 -10  23   -0.90    3.10
   4  10 -24    0.30    1.80
  -4 -10  24   -1.40    3.70
   5  10 -25   -1.50    1.60
   6  10 -26    0.10    1.60
   7  10 -27   -1.30    2.20
   9 -11  12    0.80    1.10
   8 -11  13   -0.40    1.10
   7 -11  14    0.40    1.20
   6 -11  15   -0.10    1.20
   5 -11  16    4.80    1.60
  -3  11 -18    1.00    1.60
   3 -11  18    1.70    3.40
  -2  11 -19    2.40    1.80
   2 -11  19    8.00    5.20
  -1  11 -20    5.20    1.90
   1 -11  20    8.00    5.50
   0  11 -21   -1.00    1.30
   0 -11  21    3.80    4.00
   1  11 -22    6.40    2.10
  -1 -11  22    9.90    5.10
   2  11 -23    0.80    1.70
  -2 -11  23    2.50    4.10
   3  11 -24   -0.90    1.70
  -3 -11  24    3.90    4.60
   4  11 -25    1.40    1.80
   5  11 -26    1.00    2.00
   6  11 -27    1.80    2.20
   9 -12  13    3.30    1.60
   8 -12  14    4.00    1.50
   7 -12  15    0.10    1.20
   6 -12  16    0.50    1.20
   6 -12  16   -1.70    3.10
   5 -12  17    3.80    3.80
   5 -12  17   10.70    2.10
   4 -12  18    6.40    4.90
  -3  12 -19   -0.60    1.40
   3 -12  19    1.90    4.20
  -2  12 -20    5.90    2.00
   2 -12  20    0.90    3.40
  -1  12 -21    3.00    1.80
   1 -12  21   -2.30    3.50
   0  12 -22    2.70    2.00
   0 -12  22   11.80    5.50
   1  12 -23    0.00    1.60
  -1 -12  23    4.40    4.30
   2  12 -24    0.10    1.60
  -2 -12  24    0.60    3.90
   3  12 -25    2.50    1.90
   4  12 -26    0.60    2.30
   9 -13  14    2.60    4.10
   8 -13  15    0.90    1.40
   8 -13  15    1.80    3.70
   7 -13  16    3.60    1.70
   7 -13  16    4.10    4.90
   6 -13  17    0.50    1.40
   6 -13  17    0.60    3.80
   5 -13  18    4.00    1.70
   5 -13  18    3.20    5.10
   4 -13  19    1.80    3.60
  -3  13 -20    0.90    1.80
   3 -13  20    4.10    5.20
  -2  13 -21    5.50    2.10
   2 -13  21    4.90    4.90
  -1  13 -22    3.00    1.90
   1 -13  22    8.70    5.20
   0  13 -23    2.50    2.00
   0 -13  23    2.00    4.10
   1  13 -24    0.20    1.80
   2  13 -25    0.90    2.40
   8 -14  16    1.90    1.50
   8 -14  16    1.80    4.80
   7 -14  17   -1.20    1.20
   7 -14  17   -2.60    3.30
   6 -14  18   -1.30    3.80
   6 -14  18   -0.30    1.40
   5 -14  19    4.40    1.80
   5 -14  19    0.10    4.20
   4 -14  20   -1.40    3.30
  -3  14 -21   -1.80    1.80
   3 -14  21    3.30    4.40
  -2  14 -22    1.10    2.30
   2 -14  22    2.20    4.20
  -1  14 -23   -1.50    2.30
   1 -14  23   -2.70    4.20
   0  14 -24   -0.20    1.80
   5 -15  20   -1.10    4.60
   1  18  -7    2.50    2.00
   0  18  -6    3.90    2.50
  -1  18  -5    0.20    2.20
  -2  18  -4    2.80    2.40
   5  17 -10    0.00    2.00
   4  17  -9    2.40    2.40
   3  17  -8   -2.60    1.80
   2  17  -7   -2.10    1.80
   1  17  -6   -0.80    1.70
   0  17  -5    1.30    1.70
  -1  17  -4    6.10    2.10
  -2  17  -3    2.30    1.70
  -3  17  -2    0.00    1.70
  -7 -16  11    1.20    5.90
   7  16 -11   -1.50    2.20
  -6 -16  10    6.10    5.10
   6  16 -10    1.20    2.00
  -5 -16   9    6.10    4.50
   5  16  -9   -0.80    1.70
  -4 -16   8    0.90    3.60
   4  16  -8   -1.40    1.70
  -3 -16   7    3.40    3.50
   3  16  -7    2.70    2.00
  -2 -16   6    7.40    3.60
   2  16  -6    2.00    1.70
  -1 -16   5    2.60    3.00
   1  16  -5    4.00    2.10
   0 -16   4    6.80    3.00
   0  16  -4   -1.30    1.50
   1 -16   3    3.70    3.10
  -1  16  -3    1.70    1.70
  -2  16  -2   -0.90    1.50
  -3  16  -1    0.80    1.60
  -9 -15  12   -2.70    4.60
  -8 -15  11   -1.80    4.20
   8  15 -11   -0.40    1.90
  -7 -15  10   -0.30    4.10
   7  15 -10    0.70    2.00
  -6 -15   9   -4.40    4.30
   6  15  -9   -1.50    1.70
  -5 -15   8   12.30    5.80
   5  15  -8    0.50    1.90
  -4 -15   7    0.50    3.50
   4  15  -7    0.40    1.60
  -3 -15   6   12.90    4.20
  -2 -15   5   19.10    4.30
   2  15  -5   18.00    3.00
  -1 -15   4    4.10    2.70
   1  15  -4    2.30    1.60
   0 -15   3    0.80    2.00
   0  15  -3    1.60    1.50
   1 -15   2    2.30    2.10
  -1  15  -2    4.20    1.70
   2 -15   1    3.00    2.00
  -2  15  -1   -0.50    1.20
   3 -15   0    1.80    1.70
  -3  15   0   -0.30    1.10
   4 -15  -1    2.50    1.80
   5 -15  -2   -1.90    1.40
   6 -15  -3    9.30    2.80
   7 -15  -4   -0.40    2.40
 -10 -14  12   -3.30    3.80
  10  14 -12   -3.80    2.10
  -9 -14  11    0.00    4.00
   9  14 -11   -1.80    1.70
  -8 -14  10    4.10    4.50
   8  14 -10    2.60    2.00
  -7 -14   9   -2.60    4.00
   7  14  -9   -3.70    1.80
  -6 -14   8   -4.00    4.00
   6  14  -8   -0.90    1.50
  -5 -14   7   -1.60    3.90
   5  14  -7   -2.60    1.10
  -4 -14   6    1.40    3.70
   4  14  -6    3.20    1.80
  -3 -14   5   16.40    4.50
   3  14  -5    8.20    2.20
  -2 -14   4   10.90    4.10
   2  14  -4    7.80    2.10
  -1 -14   3    4.00    3.60
   1  14  -3    1.20    2.00
   0 -14   2    5.90    3.50
   0  14  -2   -4.10    1.60
   1 -14   1    5.80    3.20
  -1  14  -1    1.30    1.80
   2 -14   0    4.10    3.00
  -2  14   0    5.30    2.00
   3 -14  -1   -0.90    1.70
  -3  14   1    1.30    1.30
   4 -14  -2    2.10    1.80
  -4  14   2   -0.40    1.10
   5 -14  -3    1.20    1.60
   6 -14  -4    4.30    2.00
   7 -14  -5    1.50    1.90
   8 -14  -6   -0.60    1.90
   9 -14  -7    1.40    2.20
 -10  14   8    3.10    2.00
 -11  14   9    0.40    1.90
 -11 -13  12    0.10    3.90
  11  13 -12   -1.30    2.40
 -10 -13  11   -0.70    3.80
  10  13 -11   -1.70    1.70
  -9 -13  10    3.40    4.00
   9  13 -10   -1.00    1.70
  -8 -13   9    2.30    4.00
   8  13  -9    2.70    1.90
  -7 -13   8    2.10    4.00
   7  13  -8   -1.40    1.60
  -6 -13   7    1.10    4.00
   6  13  -7    0.40    1.50
  -5 -13   6   16.60    5.80
   5  13  -6   -0.80    1.60
  -4 -13   5    6.30    4.30
   4  13  -5    3.60    1.80
  -3 -13   4    4.40    3.20
   3  13  -4   -1.50    1.10
  -2 -13   3   10.00    3.10
   2  13  -3    5.30    1.80
  -1 -13   2   -0.30    1.90
   1  13  -2    1.40    1.30
   0 -13   1    8.70    2.50
   0  13  -1    4.50    1.50
   1 -13   0    0.20    1.60
  -1  13   0   -0.20    1.00
   2 -13  -1    0.80    1.60
  -2  13   1    4.40    1.40
   3 -13  -2    7.90    2.20
  -3  13   2    7.40    1.60
   4 -13  -3    2.40    1.70
  -4  13   3    1.00    1.00
   5 -13  -4    1.90    2.50
   6 -13  -5    6.40    2.20
   7 -13  -6   14.20    3.10
   8 -13  -7    1.70    2.10
   9 -13  -8    1.00    2.30
 -10  13   9    0.30    1.70
 -11  13  10   -1.40    1.50
 -12  13  11    0.40    1.90
 -12 -12  12   -0.90    3.00
  12  12 -12   -2.20    2.20
 -11 -12  11   -1.50    3.00
  11  12 -11   -2.50    1.60
 -10 -12  10   -2.70    3.30
  10  12 -10    0.60    2.00
  -9 -12   9    0.20    3.50
   9  12  -9   -0.50    1.50
  -8 -12   8   -0.80    3.30
   8  12  -8    1.20    1.70
  -7 -12   7    7.60    5.10
   7  12  -7    2.70    1.90
  -6 -12   6   11.00    4.50
   6  12  -6    9.60    2.30
  -5 -12   5    1.00    3.30
   5  12  -5    4.60    1.60
  -4 -12   4   -0.50    2.90
   4  12  -4    0.90    1.10
  -3 -12   3    1.10    2.70
   3  12  -3    1.00    1.20
  -2 -12   2    6.00    2.70
   2  12  -2    2.50    1.20
  -1 -12   1    0.10    1.60
   1  12  -1   -0.20    0.90
   0 -12   0    0.40    1.60
   0  12   0    0.60    0.90
   1 -12  -1   24.40    3.80
  -1  12   1   22.90    2.90
   2 -12  -2    1.40    1.40
  -2  12   2    0.80    1.00
   3 -12  -3    8.60    2.20
  -3  12   3   12.40    1.80
   4 -12  -4    0.10    1.30
  -4  12   4    3.80    1.10
   5 -12  -5    7.90    2.20
   6 -12  -6   21.30    3.60
   7 -12  -7   -1.20    1.70
   8 -12  -8    2.80    1.90
 -10  12  10   -1.70    1.40
 -11  12  11    0.00    1.70
 -12  12  12   -0.50    1.70
 -13 -11  12   -2.80    2.40
  13  11 -12    0.10    2.40
 -12 -11  11   -0.60    2.90
  12  11 -11    2.00    1.70
 -11 -11  10   -1.70    2.70
  11  11 -10   -3.50    1.70
 -10 -11   9   -2.40    2.60
  10  11  -9    0.70    1.70
  -9 -11   8   -3.30    2.60
   9  11  -8    0.80    1.60
  -8 -11   7    0.30    3.10
   8  11  -7    0.10    2.00
  -7 -11   6   11.30    3.90
   7  11  -6   13.40    2.40
  -6 -11   5    6.20    3.50
   6  11  -5   12.90    2.20
  -5 -11   4    7.40    3.60
   5  11  -4    3.20    1.20
  -4 -11   3    7.20    3.90
   4  11  -3    5.50    1.30
  -3 -11   2    2.30    3.00
   3  11  -2    1.20    1.20
  -2 -11   1    0.80    2.00
   2  11  -1    0.00    0.90
  -1 -11   0    1.20    1.50
   1  11   0    0.70    0.80
   0 -11  -1   13.50    2.80
   0  11   1   13.30    2.00
   1 -11  -2   16.70    3.00
  -1  11   2   18.40    2.30
   2 -11  -3   -0.30    1.30
  -2  11   3    0.20    0.80
   3 -11  -4    0.40    1.50
  -3  11   4    1.10    1.00
   4 -11  -5    1.30    1.40
  -4  11   5    1.20    0.80
   5 -11  -6   10.40    2.40
   6 -11  -7   -1.90    1.30
   7 -11  -8    0.10    1.70
   8 -11  -9    1.30    1.80
 -10  11  11    1.60    1.90
 -11  11  12   -0.70    1.50
 -12  11  13   -0.70    1.70
 -13  11  14   -0.90    1.90
 -14 -10  12   -2.70    2.70
  14  10 -12    4.20    2.40
 -13 -10  11   -1.50    2.60
  13  10 -11    2.30    1.90
 -12 -10  10    1.00    2.70
  12  10 -10    0.00    1.80
 -11 -10   9   -0.30    2.50
  11  10  -9    2.00    1.60
 -10 -10   8    1.60    2.80
  10  10  -8    1.20    1.60
  -9 -10   7    7.00    3.20
   9  10  -7    2.10    1.90
  -8 -10   6   -0.10    2.40
   8  10  -6    1.50    1.30
  -7 -10   5   -1.80    2.50
   7  10  -5   -0.30    0.90
  -6 -10   4    4.80    3.50
   6  10  -4   12.00    2.00
  -5 -10   3   -1.60    2.50
   5  10  -3    1.20    1.00
  -4 -10   2    3.50    2.80
   4  10  -2    0.90    1.00
  -3 -10   1   38.10    5.50
   3  10  -1   30.50    3.20
  -2 -10   0   18.90    3.50
   2  10   0   17.20    2.20
  -1 -10  -1    7.70    2.30
   1  10   1    9.80    1.60
   0 -10  -2   10.00    2.30
   0  10   2    6.70    1.40
   1 -10  -3    8.10    2.10
  -1  10   3   13.20    1.70
   2 -10  -4    5.30    1.70
  -2  10   4    1.50    0.80
   3 -10  -5   61.69    5.80
  -3  10   5   58.99    5.10
   4 -10  -6    5.00    1.80
  -4  10   6    7.00    1.20
   5 -10  -7    0.40    1.30
  -5  10   7    1.90    0.80
   6 -10  -8    2.10    1.50
   7 -10  -9   -1.00    1.50
   8 -10 -10    5.60    2.50
  -9  10  11    4.60    2.00
 -10  10  12    1.40    1.80
 -11  10  13    6.80    2.50
 -12  10  14    0.50    1.80
 -13  10  15    1.20    2.00
 -15  -9  12    1.60    4.40
 -15  -9  12   -1.90    2.80
 -14  -9  11   -3.10    2.20
  14   9 -11    1.30    1.70
 -13  -9  10    1.70    2.80
  13   9 -10   -0.20    1.70
 -12  -9   9   -0.90    2.00
  12   9  -9    0.00    1.50
 -11  -9   8    0.80    2.50
  11   9  -8    1.90    1.50
 -10  -9   7    8.40    3.10
  10   9  -7    7.70    2.20
  -9  -9   6   -1.80    1.70
   9   9  -6    1.40    1.10
  -8  -9   5    2.00    2.10
   8   9  -5    3.90    1.40
  -7  -9   4   -0.30    2.40
   7   9  -4   -0.30    1.00
  -6  -9   3    1.70    2.60
   6   9  -3    0.90    0.90
  -5  -9   2   -2.10    2.40
   5   9  -2    1.90    1.00
  -4  -9   1   13.20    3.60
   4   9  -1   10.60    1.70
  -3  -9   0    0.20    2.10
   3   9   0    1.10    0.80
  -2  -9  -1    7.90    2.60
   2   9   1    7.10    1.40
  -1  -9  -2   15.90    2.90
   1   9   2   15.20    2.00
   0  -9  -3    0.80    1.30
   0   9   3    1.70    0.80
   1  -9  -4   93.29    7.90
  -1   9   4   85.99    7.20
   2  -9  -5   21.90    3.20
  -2   9   5   24.80    2.40
   3  -9  -6   32.00    3.70
  -3   9   6   34.70    3.10
   4  -9  -7   -0.50    1.10
  -4   9   7    1.70    0.70
   5  -9  -8   31.90    4.00
  -5   9   8   27.90    2.60
   6  -9  -9   -0.50    1.20
   7  -9 -10    0.20    1.40
  -9   9  12    1.50    1.80
 -10   9  13    7.10    2.30
 -11   9  14    1.80    1.80
 -12   9  15    1.30    1.80
 -13   9  16    0.60    1.80
 -15  -8  11   -4.10    3.10
 -15  -8  11   -1.00    2.10
 -14  -8  10    2.70    2.60
 -14  -8  10    2.10    3.30
  14   8 -10   -2.30    1.40
 -13  -8   9    0.80    2.30
  13   8  -9    5.00    1.80
 -12  -8   8   -1.80    1.90
  12   8  -8    0.30    1.40
 -11  -8   7    2.00    2.20
  11   8  -7   -4.90    1.80
 -10  -8   6   -1.20    1.60
  10   8  -6   -0.90    1.00
  -9  -8   5   -0.60    1.80
   9   8  -5    1.10    1.00
  -8  -8   4   -1.90    1.90
   8   8  -4    1.20    1.20
  -7  -8   3   -0.10    2.00
   7   8  -3    1.00    0.90
  -6  -8   2  424.36   35.60
   6   8  -2  457.15   34.00
  -5  -8   1  937.81   73.69
   5   8  -1  964.70   72.09
  -4  -8   0    2.00    2.70
  -3  -8  -1  217.28   18.40
  -2  -8  -2    2.80    2.50
   2   8   2    8.80    1.50
  -1  -8  -3   54.19    5.90
   1   8   3   56.69    4.90
   0  -8  -4    9.30    2.60
   0   8   4   10.30    1.60
   1  -8  -5    5.50    1.60
  -1   8   5    3.40    0.90
   2  -8  -6    2.20    1.30
  -2   8   6    3.00    0.80
   3  -8  -7   32.10    3.60
  -3   8   7   31.40    2.80
   4  -8  -8   17.40    2.60
  -4   8   8   15.50    1.70
   5  -8  -9    2.80    1.50
  -5   8   9    1.70    0.60
   6  -8 -10    0.50    1.40
   7  -8 -11    3.00    1.50
  -8   8  12   14.50    2.90
  -9   8  13   -0.50    1.20
 -10   8  14   -1.40    1.40
 -11   8  15   -0.80    1.50
 -12   8  16   -1.30    1.60
 -13   8  17   -1.10    1.50
 -14   8  18    0.00    1.80
 -16  -7  11    0.20    2.70
 -16  -7  11   -2.90    3.80
 -15  -7  10   -0.70    2.60
 -15  -7  10    1.30    3.60
 -14  -7   9    5.50    3.70
 -14  -7   9    0.20    2.40
  14   7  -9    4.20    2.00
 -13  -7   8   -3.10    2.90
 -13  -7   8   -1.10    2.00
  13   7  -8   -0.60    1.30
 -12  -7   7   -0.20    2.00
  12   7  -7   -0.80    1.40
 -11  -7   6   -0.20    1.80
  11   7  -6    0.10    1.10
 -10  -7   5    4.10    2.40
  10   7  -5    1.00    1.10
  -9  -7   4    2.10    2.20
   9   7  -4    5.70    1.40
  -8  -7   3    4.70    2.40
   8   7  -3    5.30    1.30
  -7  -7   2    7.40    2.70
   7   7  -2    7.90    1.50
  -6  -7   1  100.79    9.80
   6   7  -1   96.89    8.00
  -5  -7   0    1.80    2.70
   5   7   0   -0.20    0.70
  -4  -7  -1   58.49    7.20
   4   7   1   49.99    4.60
  -3  -7  -2   54.09    6.00
   3   7   2   52.49    4.60
  -2  -7  -3   23.40    3.60
   2   7   3   23.60    2.40
  -1  -7  -4    6.70    1.80
   1   7   4    6.40    1.10
   0  -7  -5    9.90    2.00
   0   7   5    8.60    1.30
   1  -7  -6  183.88   15.00
  -1   7   6  189.58   14.50
   2  -7  -7   40.60    4.80
  -2   7   7   40.90    3.50
   3  -7  -8    1.30    1.20
  -3   7   8    0.60    0.60
   4  -7  -9   23.10    3.10
  -4   7   9   19.70    1.90
   5  -7 -10   12.40    2.30
  -5   7  10   12.20    1.30
   6  -7 -11    8.00    2.00
  -8   7  13    2.70    1.60
  -9   7  14   22.00    3.70
 -10   7  15    3.10    1.90
 -11   7  16    6.50    2.30
 -12   7  17    0.20    1.50
 -13   7  18    1.70    1.70
 -14   7  19    0.10    1.60
 -16  -6  10   -0.90    2.20
 -15  -6   9   -0.40    2.10
 -15  -6   9    2.20    3.50
 -14  -6   8    4.50    3.70
 -14  -6   8    2.20    2.20
  14   6  -8    0.50    1.60
 -13  -6   7    7.60    4.00
 -13  -6   7    6.20    2.50
  13   6  -7    9.30    2.00
 -12  -6   6   23.50    5.30
 -12  -6   6   20.50    4.30
  12   6  -6   15.80    2.60
 -11  -6   5   -1.80    1.50
 -11  -6   5    1.10    2.50
  11   6  -5    0.70    1.10
 -10  -6   4    2.10    2.10
  10   6  -4    2.50    1.20
  -9  -6   3    6.00    2.40
   9   6  -3    5.10    1.30
  -8  -6   2   34.60    5.10
   8   6  -2   40.80    3.70
  -7  -6   1   16.00    3.60
   7   6  -1   31.70    2.70
  -6  -6   0  204.38   17.20
   6   6   0  198.38   15.70
  -5  -6  -1    2.20    2.40
   5   6   1    0.60    0.70
  -4  -6  -2   14.30    3.30
   4   6   2   11.30    1.70
  -3  -6  -3    6.80    2.70
   3   6   3   11.30    1.50
  -2  -6  -4  160.48   12.20
   2   6   4  133.19   11.30
  -1  -6  -5   36.00    3.60
   1   6   5   30.00    2.90
   0  -6  -6   10.80    1.90
   0   6   6    8.90    1.30
   1  -6  -7   57.99    5.10
  -1   6   7   52.99    4.50
   2  -6  -8    2.20    1.10
  -2   6   8    2.90    0.70
   3  -6  -9    8.20    2.70
   4  -6 -10   46.10    4.60
  -4   6  10   45.10    3.70
   5  -6 -11   10.40    2.20
  -5   6  11   10.80    1.10
   6  -6 -12    5.00    1.70
  -7   6  13    1.60    1.30
  -8   6  14   -0.30    1.10
  -9   6  15    1.70    1.60
 -10   6  16    8.30    2.50
 -11   6  17    3.50    1.80
 -12   6  18   -2.70    1.30
 -13   6  19    0.90    1.80
 -14   6  20   -0.70    1.70
 -17  -5  10    0.50    2.50
 -16  -5   9   -0.50    2.20
 -15  -5   8    0.80    2.10
 -14  -5   7   -2.00    1.30
 -13  -5   6   -7.70    2.90
 -13  -5   6   -2.20    2.10
  13   5  -6    0.20    1.50
 -12  -5   5    7.30    2.50
 -12  -5   5   19.40    4.70
  12   5  -5    7.60    1.70
 -11  -5   4    8.60    3.30
 -11  -5   4    0.10    1.30
  11   5  -4   -0.30    1.00
 -10  -5   3   47.80    6.50
 -10  -5   3   22.10    4.10
  10   5  -3   34.50    3.30
  -9  -5   2   10.90    2.70
   9   5  -2   15.80    1.90
  -8  -5   1    2.20    1.80
   8   5  -1    1.80    0.90
  -7  -5   0    0.70    1.70
   7   5   0    0.40    0.70
  -6  -5  -1    0.60    1.60
   6   5   1    4.60    1.00
  -5  -5  -2    1.50    2.20
   5   5   2    2.70    0.90
  -4  -5  -3    7.80    2.70
   4   5   3    5.70    1.00
  -3  -5  -4    2.30    1.80
   3   5   4    1.60    0.70
  -2  -5  -5   10.30    2.10
   2   5   5   16.80    1.80
  -1  -5  -6    2.10    1.10
   1   5   6    0.30    0.50
   0  -5  -7   74.29    6.40
   0   5   7   73.59    5.90
   1  -5  -8    2.40    1.00
  -1   5   8    2.50    0.60
   2  -5  -9   32.10    3.10
  -2   5   9   26.10    2.40
   3  -5 -10   37.90    3.80
  -3   5  10   34.60    3.00
   4  -5 -11   21.40    2.80
  -4   5  11   17.10    1.70
   5  -5 -12   32.40    3.90
  -5   5  12   41.80    3.20
  -6   5  13   28.80    2.40
  -6   5  13   31.00    4.00
  -7   5  14    9.70    2.20
  -8   5  15    6.50    1.90
  -9   5  16    4.80    1.90
 -10   5  17   11.30    2.60
 -11   5  18    0.30    1.20
 -12   5  19   -0.30    1.30
 -13   5  20   -2.20    1.20
 -14   5  21    1.20    2.00
 -17  -4   9    1.00    2.40
 -16  -4   8   -0.30    1.90
 -15  -4   7    1.90    2.20
 -14  -4   6    0.60    2.00
 -13  -4   5   -0.50    1.50
  13   4  -5   -1.00    1.30
 -12  -4   4   -0.60    1.50
  12   4  -4   -0.80    1.00
 -11  -4   3    0.30    2.60
 -11  -4   3    2.00    1.70
  11   4  -3    0.20    1.00
 -10  -4   2    1.00    1.40
 -10  -4   2    0.50    1.90
  10   4  -2    1.30    0.90
  -9  -4   1    3.20    2.10
  -9  -4   1   -1.40    1.20
   9   4  -1    0.70    0.80
  -8  -4   0  110.19   11.00
  -8  -4   0  123.79   10.80
   8   4   0  128.19    9.70
  -7  -4  -1   32.40    5.00
  -7  -4  -1   46.30    5.50
   7   4   1   39.90    3.70
  -6  -4  -2    6.90    2.30
   6   4   2    4.40    1.00
  -5  -4  -3  131.19   12.40
   5   4   3  152.78   11.30
  -4  -4  -4   19.90    3.40
   4   4   4    9.80    1.40
  -3  -4  -5  554.14   43.40
   3   4   5  569.54   42.60
  -2  -4  -6    6.50    1.50
   2   4   6    3.40    0.80
  -1  -4  -7  143.09   11.90
   1   4   7  154.98   11.60
   0  -4  -8   26.60    2.90
   0   4   8   29.00    2.50
   1  -4  -9    7.40    1.40
  -1   4   9    9.10    1.10
   2  -4 -10    2.30    1.00
  -2   4  10    2.50    0.60
   3  -4 -11   24.10    3.00
  -3   4  11   21.20    2.00
   4  -4 -12   64.99    6.00
  -4   4  12   61.79    5.00
  -5   4  13  138.09   10.60
  -6   4  14    0.50    0.40
  -6   4  14    0.10    0.90
  -7   4  15   32.80    4.30
  -8   4  16    1.50    1.20
  -9   4  17    3.40    1.60
 -10   4  18    1.10    1.60
 -11   4  19   -1.70    1.10
 -12   4  20   -0.60    1.40
 -13   4  21   -0.20    1.30
 -14   4  22   -0.50    1.50
 -17  -3   8   -1.50    1.90
 -16  -3   7    1.50    2.00
 -15  -3   6   -0.50    1.60
 -14  -3   5   -0.20    1.80
 -13  -3   4    0.00    1.40
  13   3  -4    1.50    1.20
 -12  -3   3    5.70    2.10
  12   3  -3    9.60    1.70
 -11  -3   2    4.80    2.00
  11   3  -2    6.00    1.60
 -10  -3   1   17.90    3.20
  10   3  -1   25.60    2.60
  -9  -3   0    0.50    1.10
   9   3   0    0.30    0.80
  -8  -3  -1    0.90    1.40
   8   3   1    1.00    0.80
  -7  -3  -2   31.30    4.30
   7   3   2   31.80    3.00
  -6  -3  -3   -1.40    1.10
   6   3   3    1.30    0.60
  -5  -3  -4    1.30    1.70
   5   3   4    1.10    0.60
  -4  -3  -5   49.40    5.40
   4   3   5   48.00    4.10
  -3  -3  -6   -0.10    1.40
   3   3   6    1.40    0.60
  -2  -3  -7    4.20    1.10
   2   3   7    3.90    0.80
  -1  -3  -8  122.39   10.00
   1   3   8  127.89    9.70
   0  -3  -9  152.98   12.10
   0   3   9  150.98   11.70
   1  -3 -10    1.20    0.80
  -1   3  10    1.50    0.50
   2  -3 -11   11.80    1.90
  -2   3  11   10.80    1.30
   3  -3 -12   16.80    2.60
  -3   3  12   25.60    2.10
  -4   3  13   35.60    3.10
  -4   3  13   40.30    4.50
  -5   3  14   15.30    1.40
  -5   3  14    9.60    2.00
  -6   3  15  105.49    8.10
  -6   3  15  100.79    9.00
  -7   3  16   20.80    3.20
  -8   3  17    2.60    1.30
  -9   3  18    6.20    1.90
 -10   3  19    1.80    1.40
 -11   3  20   -0.50    1.20
 -12   3  21    1.20    1.50
 -13   3  22    1.80    1.70
 -14   3  23    3.30    2.20
 -18  -2   8   -1.70    2.10
 -17  -2   7    4.60    2.40
 -16  -2   6    2.50    2.20
 -15  -2   5    0.10    1.70
 -14  -2   4    3.70    2.40
 -13  -2   3    3.00    1.70
  13   2  -3    5.30    1.40
 -12  -2   2    0.40    1.30
  12   2  -2    1.00    1.00
 -11  -2   1    4.40    1.90
  11   2  -1    8.40    1.50
 -10  -2   0   12.90    2.60
  10   2   0    9.70    1.60
  -9  -2  -1    5.80    1.80
   9   2   1    4.60    1.10
  -8  -2  -2   15.70    2.90
   8   2   2   17.90    2.10
  -7  -2  -3   79.19    7.30
   7   2   3   82.09    6.50
  -6  -2  -4   53.79    5.20
   6   2   4   48.60    4.20
  -5  -2  -5   17.60    3.00
   5   2   5   18.50    1.80
  -4  -2  -6   -0.40    1.60
   4   2   6    1.80    0.60
  -3  -2  -7   81.99    7.20
   3   2   7   85.59    6.70
  -2  -2  -8   25.70    2.60
   2   2   8   24.70    2.30
  -1  -2  -9    1.00    0.70
   1   2   9    1.20    0.50
   0  -2 -10    8.80    1.40
   0   2  10   10.50    1.20
   1  -2 -11   10.30    1.60
  -1   2  11    8.00    1.10
   2  -2 -12  108.89    8.80
  -2   2  12  105.29    8.30
  -3   2  13  219.88   16.80
  -4   2  14  113.29    8.90
  -4   2  14  114.89    9.60
  -5   2  15   38.00    3.20
  -5   2  15   36.40    5.20
  -5   2  15   40.80    4.10
  -6   2  16    2.50    1.90
  -6   2  16    3.70    1.40
  -6   2  16    2.70    0.70
  -7   2  17    0.20    1.60
  -7   2  17   -0.30    1.00
  -7   2  17    1.80    0.60
  -8   2  18   -0.40    0.90
  -8   2  18    0.40    1.60
  -9   2  19    0.10    2.00
  -9   2  19    1.70    1.50
 -10   2  20    0.80    1.50
 -11   2  21   -1.20    1.10
 -12   2  22    1.20    1.40
 -13   2  23    6.30    2.40
 -14   2  24   -0.20    1.60
 -18  -1   7    2.30    2.50
 -17  -1   6    3.80    2.30
 -16  -1   5    1.20    1.90
 -15  -1   4   -0.10    1.70
 -14  -1   3    1.30    1.90
 -13  -1   2    4.00    1.70
 -12  -1   1   20.10    3.40
  12   1  -1   21.20    2.50
 -11  -1   0    0.00    1.10
  11   1   0   -1.70    0.70
 -10  -1  -1   17.30    2.80
  10   1   1   19.50    2.20
  -9  -1  -2    0.60    1.10
   9   1   2   -0.30    0.60
  -8  -1  -3   33.70    4.20
   8   1   3   31.20    3.10
  -7  -1  -4    5.50    1.70
   7   1   4    4.70    1.00
  -6  -1  -5    2.30    1.30
   6   1   5    4.60    0.90
  -5  -1  -6   38.20    4.30
   5   1   6   42.10    3.50
  -4  -1  -7   17.00    3.00
   4   1   7   24.90    2.20
  -3  -1  -8  260.77   20.60
   3   1   8  272.87   20.40
  -2  -1  -9   28.90    2.80
   2   1   9   32.20    2.70
  -1  -1 -10  181.28   14.80
   1   1  10  201.18   14.70
   0  -1 -11  415.46   30.80
   0   1  11  391.46   30.60
   1  -1 -12   60.39    5.10
  -1   1  12   57.59    4.80
  -2   1  13  196.08   15.10
  -3   1  14    4.90    1.30
  -3   1  14    7.00    1.00
  -4   1  15    1.10    1.00
  -4   1  15    3.20    0.70
  -5   1  16    9.60    1.30
  -5   1  16   12.30    2.20
  -6   1  17   26.10    2.50
  -6   1  17   27.70    3.20
  -7   1  18    0.40    0.60
  -7   1  18   -0.60    0.80
  -7   1  18    0.60    1.50
  -8   1  19    1.20    1.90
  -8   1  19    0.00    1.10
  -9   1  20    3.80    2.50
  -9   1  20    4.80    1.80
 -10   1  21    8.60    3.60
 -10   1  21   11.50    2.80
 -11   1  22   14.80    4.50
 -11   1  22    9.20    2.60
 -12   1  23    3.90    2.10
 -13   1  24   -1.10    1.10
 -18   0   6    0.90    2.30
 -17   0   5    3.90    2.50
 -16   0   4    2.40    2.10
 -15   0   3    1.50    1.90
 -14   0   2    0.50    1.70
 -13   0   1   10.00    2.40
 -12   0   0    0.20    1.20
  12   0   0    1.00    0.90
 -11   0  -1   10.10    2.30
  11   0   1   15.10    1.80
 -10   0  -2    9.10    1.90
  10   0   2    8.00    1.30
  -9   0  -3    2.00    1.10
   9   0   3    1.20    0.70
  -8   0  -4   15.50    2.60
   8   0   4    8.20    1.50
  -7   0  -5   10.70    1.90
   7   0   5    6.70    1.10
  -6   0  -6   11.20    2.00
   6   0   6   12.00    1.50
  -5   0  -7   64.89    6.10
   5   0   7   68.69    5.50
  -4   0  -8   22.10    2.90
   4   0   8   24.30    2.20
  -3   0  -9  141.49   11.10
   3   0   9  143.19   11.10
  -2   0 -10    9.10    1.20
   2   0  10    9.50    1.20
  -1   0 -11  418.46   30.10
   1   0  11  371.46   30.00
   0   0 -12   53.89    4.30
   0   0  12   46.80    4.20
  -1   0  13   47.90    4.30
  -1   0  13   58.09    4.60
  -2   0  14   55.99    4.70
  -2   0  14   59.29    5.10
  -3   0  15   55.59    5.40
  -3   0  15   66.39    5.10
  -4   0  16    1.00    0.60
  -4   0  16    0.10    0.70
  -5   0  17   14.10    1.60
  -5   0  17   10.00    1.90
  -6   0  18   -0.50    0.80
  -6   0  18    0.10    0.50
  -7   0  19   -0.40    0.80
  -7   0  19    0.80    0.60
  -8   0  20    1.40    1.20
  -9   0  21    1.40    1.30
  -9   0  21   -1.00    1.70
 -10   0  22   36.10    6.30
 -10   0  22   27.00    4.10
 -11   0  23    8.20    3.90
 -11   0  23    9.30    2.70
 -12   0  24    1.90    1.80
 -12   0  24   -0.20    2.40
 -13   0  25    0.80    1.90
 -18   1   5    2.40    2.60
 -17   1   4    0.80    1.90
 -16   1   3    4.40    2.30
 -15   1   2    3.30    2.10
 -14   1   1    0.50    1.70
 -13   1   0   -1.00    1.10
 -12   1  -1   -0.10    1.10
  12  -1   1   -0.90    0.80
 -11   1  -2   19.90    3.00
  11  -1   2   19.40    2.20
 -10   1  -3    3.00    1.30
  10  -1   3    3.90    1.00
  -9   1  -4   18.70    2.60
   9  -1   4   16.80    2.00
  -8   1  -5   23.70    2.90
   8  -1   5   29.50    2.60
  -7   1  -6   15.90    2.20
   7  -1   6   11.20    1.60
  -6   1  -7    2.80    1.20
   6  -1   7    3.90    0.90
  -5   1  -8   40.40    3.90
   5  -1   8   35.10    3.20
  -4   1  -9    3.90    1.00
   4  -1   9    1.50    0.60
  -3   1 -10   41.30    3.40
   3  -1  10   41.00    3.50
  -2   1 -11   17.80    1.70
   2  -1  11   19.70    1.90
  -1   1 -12   55.09    4.50
   1  -1  12   53.79    4.50
   0  -1  13   48.00    4.40
   0  -1  13   58.09    4.50
  -1  -1  14   97.19    7.70
  -1  -1  14   90.99    7.50
  -2  -1  15   28.50    2.70
  -2  -1  15   29.60    2.90
  -3  -1  16   41.60    3.90
  -3  -1  16   38.60    3.50
  -4  -1  17    5.30    1.30
  -4  -1  17    6.60    1.10
  -5  -1  18   13.30    1.60
  -5  -1  18    7.50    1.80
  -6  -1  19    0.60    0.70
  -6  -1  19    1.00    1.10
  -7  -1  20    0.70    0.70
  -7  -1  20    0.90    1.10
  -7  -1  20   -0.10    1.80
  -8  -1  21    6.20    1.80
  -9  -1  22   12.80    2.70
 -10  -1  23    1.90    1.60
 -11  -1  24    0.40    1.60
 -11  -1  24    0.60    2.10
 -12  -1  25   -1.50    2.30
 -12  -1  25    0.50    1.70
 -13  -1  26   -0.70    1.60
 -13  -1  26    1.10    3.40
 -18   2   4    1.40    2.40
 -17   2   3   -1.40    1.60
 -16   2   2    2.60    2.00
 -15   2   1   23.70    4.00
 -14   2   0    3.40    2.10
 -13   2  -1    2.80    1.50
 -12   2  -2    4.30    1.50
  12  -2   2    1.20    0.90
 -11   2  -3    5.70    1.60
  11  -2   3    8.20    1.30
 -10   2  -4   11.70    2.10
  10  -2   4   10.30    1.50
  -9   2  -5    0.90    1.00
   9  -2   5    1.50    0.70
  -8   2  -6   11.10    1.80
   8  -2   6   12.00    1.60
  -7   2  -7  264.17   21.40
   7  -2   7  289.37   21.20
  -6   2  -8   18.80    2.40
   6  -2   8   17.60    2.00
  -5   2  -9   56.89    5.00
   5  -2   9   55.89    4.70
  -4   2 -10   32.00    2.60
   4  -2  10   31.80    2.90
  -3   2 -11    2.80    0.50
   3  -2  11    1.70    0.70
   2  -2  12  105.39    8.30
   2  -2  12  104.49    8.10
   1  -2  13   65.89    5.30
   1  -2  13   66.49    5.50
   0  -2  14   58.19    4.90
   0  -2  14   58.99    4.90
  -1  -2  15    5.10    1.10
  -1  -2  15    2.80    0.90
  -2  -2  16   64.49    5.50
  -2  -2  16   61.59    5.30
  -3  -2  17    2.90    1.00
  -3  -2  17    4.40    1.00
  -4  -2  18    3.80    1.20
  -4  -2  18    2.70    0.80
  -5  -2  19   14.30    2.40
  -6  -2  20    0.90    1.00
  -7  -2  21   -0.20    1.00
  -7  -2  21    0.60    2.50
  -8  -2  22   43.70    4.00
  -8  -2  22   40.40    4.70
  -9  -2  23    3.50    1.90
 -10  -2  24   -1.30    1.20
 -11  -2  25    2.00    1.70
 -12  -2  26   -0.40    1.40
 -12  -2  26   -0.40    2.90
 -18   3   3   -1.10    2.00
 -17   3   2    0.70    1.90
 -16   3   1    0.20    1.60
 -15   3   0    0.80    1.70
 -14   3  -1    9.00    2.40
 -13   3  -2    0.90    1.40
 -12   3  -3   -0.70    1.10
 -11   3  -4   -0.20    1.00
  11  -3   4   -0.90    0.70
 -10   3  -5   -0.60    0.80
  10  -3   5    1.40    0.70
  -9   3  -6   19.30    2.40
   9  -3   6   16.10    2.00
  -8   3  -7   21.00    2.40
   8  -3   7   26.30    2.40
  -7   3  -8   17.20    2.00
   7  -3   8   15.10    1.90
  -6   3  -9   11.60    1.90
   6  -3   9   10.00    1.60
  -5   3 -10    2.90    1.00
   5  -3  10    6.00    1.00
   4  -3  11   92.29    7.40
   3  -3  12   22.00    2.20
   2  -3  13    3.40    0.90
   2  -3  13    6.70    0.80
   1  -3  14    3.50    1.00
   1  -3  14    5.70    0.90
   0  -3  15   67.09    5.20
   0  -3  15   54.89    4.90
  -1  -3  16  237.48   20.10
  -1  -3  16  280.07   20.20
  -2  -3  17   -0.10    0.60
  -3  -3  18   28.20    3.00
  -4  -3  19    0.30    0.80
  -5  -3  20   11.10    2.10
  -6  -3  21   14.30    2.40
  -6  -3  21    3.70    2.70
  -7  -3  22    5.80    1.90
  -7  -3  22    4.20    3.40
  -8  -3  23    3.20    3.60
  -8  -3  23    2.70    1.60
  -9  -3  24   -0.70    1.10
 -10  -3  25    4.30    2.00
 -11  -3  26   -0.70    1.50
 -12  -3  27   -0.80    1.60
 -16   4   0    0.80    1.80
 -15   4  -1    5.80    2.10
 -14   4  -2   16.70    3.10
 -13   4  -3    1.00    1.20
 -12   4  -4   -1.00    1.00
 -11   4  -5   -0.10    0.90
  11  -4   5    0.00    0.80
 -10   4  -6    0.80    0.90
  10  -4   6    0.80    0.80
  -9   4  -7    2.10    0.90
   9  -4   7    0.30    0.60
  -8   4  -8    4.70    1.10
   8  -4   8    4.00    1.00
  -7   4  -9   -0.20    0.60
   7  -4   9    1.30    0.70
  -6   4 -10    1.40    0.90
   6  -4  10    0.80    0.70
   5  -4  11    3.70    1.00
   4  -4  12   58.89    5.10
   3  -4  13   19.60    2.40
   2  -4  14   15.40    1.60
   2  -4  14   15.90    2.10
   1  -4  15   21.50    2.10
   1  -4  15   26.10    2.50
   0  -4  16    1.50    0.60
   0  -4  16    3.20    1.00
  -1  -4  17   12.20    1.70
   2   4 -18    4.30    1.10
  -2  -4  18    4.60    1.20
   3   4 -19    9.10    1.70
  -3  -4  19    9.60    1.70
   4   4 -20    5.30    1.50
  -4  -4  20    3.70    1.30
   5   4 -21   -1.00    0.80
  -5  -4  21   -0.10    0.90
   6   4 -22    0.40    1.10
  -6  -4  22   -2.20    2.40
  -6  -4  22   -0.80    0.90
   7   4 -23    1.40    1.80
  -7  -4  23    0.50    3.10
  -7  -4  23    0.00    1.10
   8   4 -24    0.70    1.20
  -8  -4  24    1.30    1.40
  -9  -4  25    5.00    2.20
 -10  -4  26    2.00    1.70
 -11  -4  27   -0.70    1.30
 -12   5  -5    4.70    1.50
 -11   5  -6    1.70    1.00
  11  -5   6    0.50    0.90
 -10   5  -7    3.90    1.20
  10  -5   7    4.30    1.10
  -9   5  -8    5.60    1.20
   9  -5   8    5.40    1.10
  -8   5  -9   18.00    1.90
   8  -5   9   18.70    2.20
  -7   5 -10    8.80    1.20
   7  -5  10    7.20    1.30
   6  -5  11   19.80    2.30
   5  -5  12   45.60    4.10
   4  -5  13   71.79    6.10
   3  -5  14   48.40    4.40
   2  -5  15   15.30    2.10
   2  -5  15   16.10    1.80
   1  -5  16    5.90    1.20
   1  -5  16    6.10    1.10
   0  -5  17   13.60    1.80
   1   5 -18   27.70    3.00
  -1  -5  18   28.50    2.90
   2   5 -19   -0.60    0.70
  -2  -5  19    0.40    0.70
   3   5 -20   40.60    4.10
  -3  -5  20   42.50    4.20
   4   5 -21   31.70    3.20
  -4  -5  21   26.70    3.20
   5   5 -22    0.80    1.10
  -5  -5  22   -1.70    2.00
  -5  -5  22    2.70    1.30
   6   5 -23    1.20    1.60
  -6  -5  23    2.90    1.50
  -6  -5  23    2.50    3.20
   7   5 -24    0.50    1.20
  -7  -5  24    2.00    3.20
  -7  -5  24   -0.30    1.20
   8   5 -25    2.80    1.40
  -8  -5  25    1.30    1.60
  -9  -5  26    0.70    1.50
 -10  -5  27    5.00    2.10
 -11  -5  28    2.50    2.00
  11  -6   7    3.30    1.10
  10  -6   8    0.50    0.80
   9  -6   9    0.30    0.70
   8  -6  10   19.60    2.40
   7  -6  11    3.10    1.00
   6  -6  12    5.00    1.10
   5  -6  13    0.60    0.80
   4  -6  14    2.10    0.90
   3  -6  15   32.40    3.30
   2  -6  16    5.30    1.20
   2  -6  16    2.30    1.30
   1  -6  17   20.30    2.50
   0   6 -18   -0.90    0.70
   0  -6  18   -0.10    0.70
   1   6 -19    5.80    1.60
  -1  -6  19    4.90    1.30
   2   6 -20    4.50    1.40
  -2  -6  20    6.60    1.60
   3   6 -21   18.10    2.50
  -3  -6  21   13.90    2.40
   4   6 -22   10.10    1.90
  -4  -6  22    5.10    3.40
  -4  -6  22   11.30    2.20
   5   6 -23    5.50    1.90
  -5  -6  23    3.90    1.60
  -5  -6  23    4.50    3.60
   6   6 -24    1.80    1.30
  -6  -6  24    2.90    3.40
  -6  -6  24    1.60    1.40
   7   6 -25    0.40    1.30
  -7  -6  25    0.00    3.00
  -7  -6  25    0.80    1.40
   8   6 -26   -0.30    1.50
  -8  -6  26   -0.30    1.50
   9   6 -27    3.30    1.90
  -9  -6  27    0.20    1.60
 -10  -6  28    4.40    2.40
  10  -7   9    0.20    0.80
   9  -7  10    4.00    1.20
   8  -7  11    7.70    1.50
   7  -7  12    7.10    1.40
   6  -7  13   28.00    3.20
   5  -7  14    1.20    0.90
   4  -7  15    1.00    0.90
   3  -7  16   17.70    2.50
  -1   7 -18    3.10    1.30
   0   7 -19   -0.40    0.80
   1   7 -20    0.70    0.90
   2   7 -21    2.80    1.40
  -2  -7  21    3.70    1.80
   3   7 -22    5.00    1.70
  -3  -7  22    2.00    1.20
   4   7 -23   16.30    3.10
  -4  -7  23   13.40    2.70
  -4  -7  23   16.70    5.40
   5   7 -24   16.90    2.80
  -5  -7  24   17.80    3.20
  -5  -7  24   22.00    6.60
   6   7 -25    2.90    1.50
  -6  -7  25    1.90    1.50
  -6  -7  25    4.90    4.00
   7   7 -26   -0.30    1.60
  -7  -7  26    0.20    1.50
   8   7 -27    2.10    1.60
  -8  -7  27    0.90    1.60
   9   7 -28    2.40    2.00
  -9  -7  28   -0.80    1.50
  10  -8  10    1.30    1.10
   9  -8  11    4.60    1.30
   8  -8  12   16.10    2.30
   7  -8  13   14.80    2.10
   6  -8  14   -0.40    0.80
   5  -8  15    1.20    1.00
   4  -8  16    1.10    1.00
   3  -8  17   -0.40    0.90
  -1   8 -19    1.90    1.20
   0   8 -20    2.00    1.20
   1   8 -21    0.00    1.20
   2   8 -22    4.50    1.60
   3   8 -23   -0.80    1.50
  -3  -8  23    2.50    3.90
   4   8 -24    1.00    1.50
  -4  -8  24   -0.80    3.10
   5   8 -25   -0.80    1.40
  -5  -8  25   -0.20    3.40
   6   8 -26    0.00    1.70
  -6  -8  26   -1.20    3.20
   7   8 -27    0.00    1.50
   8   8 -28    1.10    1.80
  10  -9  11    1.60    1.10
   9  -9  12    0.70    1.30
   8  -9  13    1.70    1.20
   7  -9  14   35.50    3.60
   6  -9  15   -0.20    1.00
   5  -9  16   11.20    2.00
   4  -9  17    1.30    1.20
  -1   9 -20   16.20    2.60
   0   9 -21    2.90    1.70
   1   9 -22    2.60    1.80
  -1  -9  22    4.90    3.90
   2   9 -23   -0.70    1.30
  -2  -9  23   -1.10    3.10
   3   9 -24   -1.70    1.50
  -3  -9  24   -0.50    3.20
   4   9 -25   -2.20    1.40
  -4  -9  25    2.90    4.20
   5   9 -26   -2.50    1.50
  -5  -9  26   -2.70    3.40
   6   9 -27    1.40    1.70
   7   9 -28   -3.50    2.00
  10 -10  12    2.50    1.30
   9 -10  13    0.40    1.20
   8 -10  14    1.90    1.30
   7 -10  15   -1.00    1.20
   6 -10  16    1.40    1.40
   5 -10  17   -0.10    1.20
   4 -10  18   -0.60    1.20
  -2  10 -20   -0.40    1.40
  -1  10 -21   16.90    2.90
   0  10 -22   38.40    4.70
   0 -10  22   41.80    9.00
   1  10 -23   22.60    3.30
  -1 -10  23   16.00    6.00
   2  10 -24    2.30    1.80
  -2 -10  24    3.90    4.00
   3  10 -25   -1.60    1.80
  -3 -10  25    1.40    3.90
   4  10 -26    0.30    1.60
  -4 -10  26    1.90    4.30
   5  10 -27   -0.80    1.60
   6  10 -28   10.70    3.00
   9 -11  14    0.10    1.10
   8 -11  15    0.90    1.30
   7 -11  16    1.00    1.30
   6 -11  17   -0.90    1.00
   5 -11  18    6.20    1.70
   4 -11  19    3.80    1.50
   2 -11  21    1.20    3.60
  -1  11 -22   -2.00    1.30
   1 -11  22    0.90    3.70
   0  11 -23   12.60    2.50
   0 -11  23    5.70    4.60
   1  11 -24    1.30    2.00
  -1 -11  24    6.20    5.10
   2  11 -25   -0.40    1.70
  -2 -11  25    0.50    4.10
   3  11 -26    3.90    2.20
  -3 -11  26    0.60    3.80
   4  11 -27   -2.20    1.90
   5  11 -28    1.70    2.10
   9 -12  15   -0.70    1.20
   8 -12  16    0.00    1.20
   7 -12  17   -1.70    1.30
   6 -12  18    0.80    1.30
   5 -12  19    2.00    1.40
   4 -12  20    1.40    1.40
   4 -12  20   -2.20    2.80
   3 -12  21    5.80    4.40
   2 -12  22   -1.80    4.10
  -1  12 -23   -1.90    1.50
   1 -12  23   -3.00    3.10
   0  12 -24    1.50    1.60
   0 -12  24    0.80    3.80
   1  12 -25   -0.20    1.80
  -1 -12  25   -3.70    3.20
   2  12 -26   -1.50    1.60
  -2 -12  26   -4.90    3.00
   3  12 -27   -2.90    1.80
   9 -13  16   -1.70    4.00
   9 -13  16    1.60    1.40
   8 -13  17    0.40    1.40
   8 -13  17    6.70    5.20
   7 -13  18    1.70    3.80
   7 -13  18   -1.70    1.10
   6 -13  19    1.40    1.40
   6 -13  19   -2.00    3.70
   5 -13  20    0.40    1.40
   5 -13  20    0.20    4.30
   4 -13  21    1.00    1.60
   4 -13  21    2.60    4.20
   3 -13  22    8.40    5.60
   2 -13  23    6.30    5.10
  -1  13 -24    5.90    2.40
   1 -13  24    4.30    4.70
   0  13 -25    5.50    2.50
   0 -13  25   -0.70    4.10
   1  13 -26    5.20    2.30
  -1 -13  26    2.40    4.80
   9 -14  17    4.10    5.50
   8 -14  18    0.00    1.50
   8 -14  18   -5.50    4.10
   7 -14  19    5.90    5.60
   7 -14  19   -1.80    1.50
   6 -14  20    0.30    4.30
   6 -14  20    1.00    1.60
   5 -14  21    0.50    1.70
   5 -14  21   -3.10    3.50
   4 -14  22    0.20    1.60
   4 -14  22    2.70    4.50
   3 -14  23    2.60    1.90
   3 -14  23    5.90    6.10
   2 -14  24   -0.50    4.30
   2  18  -6    0.70    2.20
   1  18  -5    2.60    2.30
   0  18  -4   -0.10    2.20
  -1  18  -3    1.60    2.10
  -2  18  -2    0.70    2.10
  -5 -17   8    7.40    5.10
   5  17  -8   -1.00    2.30
  -4 -17   7    6.50    3.60
   4  17  -7   -3.20    1.70
  -3 -17   6    3.70    3.50
   3  17  -6    0.60    1.80
  -2 -17   5    5.50    3.40
   2  17  -5    0.10    1.90
   1  17  -4    1.60    1.80
   0  17  -3    2.20    1.70
  -1  17  -2    4.50    1.90
  -2  17  -1    1.30    1.70
  -7 -16   9   -3.30    4.80
   7  16  -9    0.60    2.50
  -6 -16   8   -1.00    4.50
   6  16  -8   -1.10    1.80
  -5 -16   7    2.90    3.80
   5  16  -7   -2.50    1.60
  -4 -16   6   14.50    4.50
   4  16  -6    1.60    2.00
  -3 -16   5    5.70    3.80
   3  16  -5   -0.80    1.80
  -2 -16   4    3.10    3.60
   2  16  -4    1.30    2.10
  -1 -16   3    8.20    3.40
   1  16  -3    2.40    1.90
   0 -16   2    4.00    2.70
   0  16  -2    3.00    1.80
   1 -16   1    1.90    2.50
  -1  16  -1   -0.20    1.50
   2 -16   0    3.90    2.60
  -2  16   0    0.10    1.60
   3 -16  -1   -1.00    2.30
  -3  16   1   -0.90    1.40
   4 -16  -2    4.00    2.30
   5 -16  -3   -0.60    1.90
  -9 -15  10   -3.20    4.50
   9  15 -10   -1.80    2.20
  -8 -15   9    3.90    4.50
   8  15  -9    5.60    2.40
  -7 -15   8    3.90    5.50
   7  15  -8   -0.30    1.70
  -6 -15   7   11.70    5.70
   6  15  -7    0.40    1.70
  -5 -15   6    1.90    4.30
   5  15  -6    1.00    1.90
  -4 -15   5    7.10    3.80
   4  15  -5    8.80    2.20
  -3 -15   4   12.30    4.00
   3  15  -4    8.50    2.30
  -2 -15   3   -0.60    2.70
   2  15  -3   -1.40    1.40
  -1 -15   2    6.10    3.00
   1  15  -2    0.70    1.40
   0 -15   1   11.10    3.20
   0  15  -1    6.60    1.90
   1 -15   0    2.30    2.30
  -1  15   0   -0.20    1.30
   2 -15  -1    1.50    2.00
  -2  15   1    2.30    1.40
   3 -15  -2   -0.20    1.80
  -3  15   2   -0.80    1.10
   4 -15  -3   -0.40    1.70
   5 -15  -4    2.00    2.10
   6 -15  -5    5.40    2.50
   7 -15  -6    3.30    2.30
   8 -15  -7    0.60    2.20
   9 -15  -8   -0.60    2.60
 -10 -14  10    0.50    4.50
  10  14 -10    1.60    2.20
  -9 -14   9    1.70    4.50
   9  14  -9    2.80    2.00
  -8 -14   8    2.60    4.60
   8  14  -8    0.70    1.80
  -7 -14   7   -5.30    3.30
   7  14  -7   -0.50    1.80
  -6 -14   6    0.50    4.30
   6  14  -6    1.30    1.60
  -5 -14   5    3.80    4.20
   5  14  -5   -0.40    1.40
  -4 -14   4   14.20    4.70
   4  14  -4    7.30    2.20
  -3 -14   3   26.70    5.50
   3  14  -3   21.90    3.30
  -2 -14   2    5.40    4.20
   2  14  -2    8.00    2.40
  -1 -14   1    2.30    3.60
   1  14  -1    4.20    2.10
   0 -14   0   26.60    4.80
   0  14   0   16.90    3.00
   1 -14  -1   -1.20    2.90
  -1  14   1    0.10    1.60
   2 -14  -2   -0.80    2.60
  -2  14   2    1.90    1.50
   3 -14  -3    2.30    2.00
  -3  14   3    6.30    1.60
   4 -14  -4   -0.30    1.70
   5 -14  -5   -2.00    1.50
   6 -14  -6    6.40    2.40
   7 -14  -7    3.70    2.30
   8 -14  -8   -1.20    2.10
   9 -14  -9    3.20    2.50
 -10  14  10    1.00    1.80
 -12 -13  11   -4.60    4.20
 -11 -13  10    2.30    4.20
  11  13 -10   -1.10    2.00
 -10 -13   9   -0.40    3.80
  10  13  -9    0.40    2.00
  -9 -13   8    1.00    3.80
   9  13  -8    1.20    2.00
  -8 -13   7    3.40    4.20
   8  13  -7    0.00    1.50
  -7 -13   6   -2.80    3.80
   7  13  -6   -0.20    1.60
  -6 -13   5    3.90    4.80
   6  13  -5    1.30    1.60
  -5 -13   4   31.40    6.90
   5  13  -4   14.90    3.20
  -4 -13   3    3.80    3.40
   4  13  -3    2.70    1.40
  -3 -13   2    1.50    2.90
   3  13  -2    0.90    1.20
  -2 -13   1    6.10    2.80
   2  13  -1    3.10    1.40
  -1 -13   0   -0.40    1.90
   1  13   0    1.30    1.20
   0 -13  -1    6.80    2.50
   0  13   1    7.30    1.70
   1 -13  -2    3.90    2.00
  -1  13   2    2.70    1.30
   2 -13  -3    6.10    2.20
  -2  13   3    7.90    1.60
   3 -13  -4    2.70    1.80
  -3  13   4   -0.80    0.80
   4 -13  -5    0.40    2.00
  -4  13   5    0.20    1.10
   5 -13  -6    1.30    1.90
   6 -13  -7    9.50    2.80
   7 -13  -8   -0.70    1.80
   8 -13  -9    6.60    2.70
   9 -13 -10    0.10    2.20
 -10  13  11    0.40    1.80
 -11  13  12    0.90    1.90
 -13 -12  11   -1.40    3.70
 -12 -12  10   -1.80    2.60
  12  12 -10    0.10    2.20
 -11 -12   9   -1.00    3.60
  11  12  -9    0.40    1.80
 -10 -12   8    0.70    3.50
  10  12  -8    1.30    2.00
  -9 -12   7   -3.30    3.10
   9  12  -7   -1.00    1.60
  -8 -12   6   -2.20    3.30
   8  12  -6   -1.40    1.40
  -7 -12   5   44.30    7.90
   7  12  -5   37.90    4.70
  -6 -12   4    1.90    3.60
   6  12  -4   12.00    2.20
  -5 -12   3   -5.20    2.90
   5  12  -3    1.00    1.20
  -4 -12   2   12.40    4.10
   4  12  -2    9.60    1.90
  -3 -12   1   -0.40    2.20
   3  12  -1    0.20    1.10
  -2 -12   0   12.00    3.10
   2  12   0    9.90    1.90
  -1 -12  -1    3.50    2.00
   1  12   1   -0.60    0.80
   0 -12  -2   -1.00    1.50
   0  12   2   -0.30    0.90
   1 -12  -3   11.70    2.60
  -1  12   3    4.50    1.40
   2 -12  -4    0.00    1.30
  -2  12   4    1.00    0.90
   3 -12  -5    1.70    1.50
  -3  12   5    1.60    1.00
   4 -12  -6    7.50    2.20
  -4  12   6    8.60    1.60
   5 -12  -7   -0.40    1.50
   6 -12  -8    4.80    3.20
   7 -12  -9    0.10    1.90
   8 -12 -10    9.10    2.80
 -10  12  12    0.90    1.70
 -11  12  13   -0.20    1.80
 -12  12  14   -2.00    1.80
 -13 -11  10    1.50    3.40
  13  11 -10   -2.70    1.60
 -12 -11   9    2.70    3.00
  12  11  -9   -1.70    1.60
 -11 -11   8   -4.70    2.20
  11  11  -8    3.80    2.20
 -10 -11   7    0.00    3.10
  10  11  -7    0.30    1.70
  -9 -11   6    1.90    3.30
   9  11  -6    4.00    2.00
  -8 -11   5   -0.40    3.20
   8  11  -5    1.00    1.60
  -7 -11   4    1.60    3.60
   7  11  -4    4.60    1.60
  -6 -11   3   -0.80    3.00
   6  11  -3    0.80    1.00
  -5 -11   2    5.80    3.40
   5  11  -2    1.30    1.10
  -4 -11   1   19.40    4.80
   4  11  -1    7.20    1.60
  -3 -11   0    1.20    2.50
   3  11   0    2.00    1.20
  -2 -11  -1    3.70    2.30
   2  11   1    0.60    0.90
  -1 -11  -2   19.70    3.60
   1  11   2   20.50    2.60
   0 -11  -3    1.60    1.70
   0  11   3    2.70    1.10
   1 -11  -4   18.10    3.20
  -1  11   4   18.00    2.30
   2 -11  -5   -0.80    1.90
  -2  11   5    3.40    1.10
   3 -11  -6   10.00    2.30
  -3  11   6   13.00    1.80
   4 -11  -7    0.80    1.30
  -4  11   7    3.80    1.00
   5 -11  -8    2.30    1.70
   6 -11  -9    2.80    1.70
   7 -11 -10   -3.30    2.30
   8 -11 -11    0.80    1.90
  -9  11  12    0.70    1.70
 -10  11  13   -0.10    1.60
 -11  11  14   -1.40    1.60
 -12  11  15    2.00    2.20
 -14 -10  10   -1.80    2.30
  14  10 -10    1.50    2.20
 -13 -10   9    1.50    3.10
  13  10  -9   -1.90    1.50
 -12 -10   8   -4.40    1.80
  12  10  -8   -1.50    2.00
 -11 -10   7    0.00    2.70
  11  10  -7    0.00    1.50
 -10 -10   6   -2.80    2.60
  10  10  -6   -0.20    1.30
  -9 -10   5    2.20    3.20
   9  10  -5    5.20    1.80
  -8 -10   4    9.80    3.60
   8  10  -4   16.80    2.40
  -7 -10   3    0.80    2.90
   7  10  -3    2.10    1.10
  -6 -10   2    8.90    3.80
   6  10  -2   12.40    2.10
  -5 -10   1    3.90    3.40
   5  10  -1   -0.90    0.80
  -4 -10   0   34.00    5.60
   4  10   0   29.80    3.10
  -3 -10  -1   23.40    4.40
   3  10   1   29.20    2.90
  -2 -10  -2    7.10    2.50
  -1 -10  -3    3.30    1.80
   1  10   3    4.80    1.10
   0 -10  -4    3.80    1.60
   0  10   4    0.80    0.70
   1 -10  -5    6.20    1.80
  -1  10   5    6.50    1.30
   2 -10  -6  160.98   12.70
  -2  10   6  142.49   11.90
   3 -10  -7   -0.20    1.20
  -3  10   7    0.20    0.70
   4 -10  -8   -2.60    1.30
  -4  10   8    0.60    0.70
   5 -10  -9    1.10    1.40
   6 -10 -10    1.50    1.60
   7 -10 -11    0.20    1.70
   8 -10 -12   27.80    4.90
  -9  10  13    1.00    1.70
 -10  10  14    4.80    2.10
 -11  10  15    1.00    1.90
 -12  10  16   -2.90    1.30
 -13  10  17   -0.10    1.80
 -15  -9  10   -3.70    3.60
 -15  -9  10    2.60    3.20
 -14  -9   9    2.50    3.00
 -14  -9   9    1.90    3.90
  14   9  -9    2.10    1.90
 -13  -9   8   -2.30    2.50
  13   9  -8    1.40    1.80
 -12  -9   7   -3.60    2.20
  12   9  -7    0.60    1.50
 -11  -9   6   10.70    3.90
  11   9  -6   14.40    2.50
 -10  -9   5   15.30    3.90
  10   9  -5   10.70    2.10
  -9  -9   4    0.50    2.20
   9   9  -4    1.50    1.20
  -8  -9   3    0.80    2.20
   8   9  -3    3.10    1.30
  -7  -9   2    1.80    3.00
  -6  -9   1    8.80    3.80
   6   9  -1    6.60    1.40
  -5  -9   0    0.20    2.60
   5   9   0   -0.50    0.70
  -4  -9  -1   12.60    4.00
   4   9   1   10.30    1.60
  -3  -9  -2   11.80    3.20
   3   9   2   10.70    1.70
  -2  -9  -3   10.70    2.60
   2   9   3   13.60    1.90
  -1  -9  -4   16.60    2.90
   1   9   4   15.10    2.00
   0  -9  -5    8.60    2.00
   0   9   5    8.20    1.40
   1  -9  -6   18.00    2.90
  -1   9   6   16.70    2.10
   2  -9  -7   10.90    2.20
  -2   9   7    8.40    1.40
   3  -9  -8    1.30    1.20
  -3   9   8    1.40    0.70
   4  -9  -9    0.70    1.10
  -4   9   9    1.30    0.70
   5  -9 -10    2.00    1.80
   6  -9 -11    0.70    1.60
   7  -9 -12    0.60    1.50
  -9   9  14    8.90    2.50
 -10   9  15    3.90    2.10
 -11   9  16    1.60    2.00
 -12   9  17   -1.50    1.50
 -13   9  18    0.50    1.70
 -16  -8  10    0.30    2.70
 -16  -8  10    1.40    4.30
 -15  -8   9    2.70    3.80
 -15  -8   9    0.30    2.80
 -14  -8   8   -0.50    2.60
 -14  -8   8   -2.20    3.00
  14   8  -8   -0.30    1.60
 -13  -8   7   -3.10    3.00
 -13  -8   7   -0.60    1.90
  13   8  -7   -1.50    1.30
 -12  -8   6    2.50    2.40
  12   8  -6    2.70    1.70
 -11  -8   5    2.90    2.40
  11   8  -5   -0.50    1.50
 -10  -8   4    1.20    2.30
  10   8  -4   -0.30    1.10
  -9  -8   3    6.00    2.80
   9   8  -3    5.60    1.50
  -8  -8   2   10.00    3.30
   8   8  -2   16.10    2.20
  -7  -8   1    2.90    2.50
   7   8  -1    3.80    1.10
   6   8   0  983.20   74.39
  -5  -8  -1 1017.40   76.59
   5   8   1  964.90   74.79
  -4  -8  -2    2.20    2.60
   4   8   2    4.40    1.20
  -3  -8  -3    6.80    2.40
   3   8   3    3.90    1.00
  -2  -8  -4   14.30    3.00
   2   8   4   16.30    2.10
  -1  -8  -5   28.10    3.90
   1   8   5   26.50    2.70
   0  -8  -6    7.50    2.00
   0   8   6    2.70    0.90
   1  -8  -7   12.60    2.30
  -1   8   7   16.40    1.90
   2  -8  -8   20.40    2.70
  -2   8   8   12.60    1.70
   3  -8  -9   -0.50    1.00
  -3   8   9    1.30    0.60
   4  -8 -10    1.50    1.40
  -4   8  10    1.30    0.60
   5  -8 -11    7.10    1.90
  -5   8  11    3.00    0.70
   6  -8 -12    1.40    1.40
   7  -8 -13   15.90    3.10
  -8   8  14    3.80    1.80
  -9   8  15    0.10    1.50
 -10   8  16    3.20    2.10
 -11   8  17    2.00    1.90
 -12   8  18   -1.30    1.50
 -13   8  19    0.90    2.00
 -16  -7   9   -1.10    3.70
 -16  -7   9    0.60    2.30
 -15  -7   8    2.70    3.90
 -15  -7   8    1.40    2.60
 -14  -7   7   -0.50    2.10
 -14  -7   7    0.40    3.30
  14   7  -7   -2.10    1.40
 -13  -7   6   13.70    4.50
 -13  -7   6   13.20    3.60
  13   7  -6    8.20    2.10
 -12  -7   5    3.00    2.60
 -12  -7   5    3.70    3.90
  12   7  -5    1.80    2.00
 -11  -7   4    0.90    2.00
  11   7  -4   -0.10    1.00
 -10  -7   3    0.30    1.70
  10   7  -3    0.90    1.00
  -9  -7   2    1.20    1.90
   9   7  -2    3.70    1.30
  -8  -7   1    5.90    2.40
   8   7  -1   13.80    1.90
  -7  -7   0    0.00    2.10
   7   7   0    0.20    0.70
   6   7   1   98.69    8.10
  -5  -7  -2   86.39    9.10
   5   7   2   88.49    7.30
  -4  -7  -3   35.60    6.40
   4   7   3   27.00    3.20
  -3  -7  -4  168.58   14.40
  -2  -7  -5   71.69    6.10
   2   7   5   52.29    5.00
  -1  -7  -6   11.60    2.30
   1   7   6   14.00    1.70
   0  -7  -7   22.10    3.00
   0   7   7   17.90    2.10
   1  -7  -8   -3.10    2.10
  -1   7   8    1.60    0.80
   2  -7  -9   34.30    3.70
  -2   7   9   34.00    3.10
   3  -7 -10    2.10    1.20
  -3   7  10    3.40    0.80
   4  -7 -11   15.00    2.60
  -4   7  11   18.00    1.70
   5  -7 -12   13.00    2.60
  -5   7  12   18.50    1.70
   6  -7 -13   26.40    3.90
  -8   7  15   18.20    3.30
  -9   7  16    0.90    1.70
 -10   7  17    3.50    1.80
 -11   7  18    1.50    1.80
 -12   7  19    0.60    1.50
 -13   7  20   -1.40    1.20
 -16  -6   8   -3.60    1.90
 -15  -6   7    2.50    2.90
 -14  -6   6    5.40    2.90
 -14  -6   6   11.50    4.60
  14   6  -6   10.60    2.20
 -13  -6   5    8.40    4.00
 -13  -6   5    3.60    2.50
  13   6  -5    2.60    1.70
 -12  -6   4    1.30    2.60
 -12  -6   4    0.50    1.90
  12   6  -4    0.40    1.20
 -11  -6   3   -0.40    2.20
 -11  -6   3   -0.70    1.80
  11   6  -3    1.30    1.10
 -10  -6   2    0.00    1.80
 -10  -6   2    2.80    2.80
  10   6  -2    0.20    1.00
  -9  -6   1    1.10    1.70
   9   6  -1   -1.30    0.70
  -8  -6   0    0.20    1.70
   8   6   0   -1.20    0.70
  -7  -6  -1   15.30    3.80
   7   6   1   31.10    2.70
  -6  -6  -2    2.50    2.70
   6   6   2    1.10    0.90
  -5  -6  -3   42.50    6.10
   5   6   3   46.60    4.10
  -4  -6  -4   -0.20    2.40
   4   6   4    2.00    0.70
  -3  -6  -5  141.09   12.20
   3   6   5  141.79   11.10
  -2  -6  -6   35.00    3.60
   2   6   6   27.50    2.80
  -1  -6  -7    2.10    1.20
   1   6   7    3.90    0.90
   0  -6  -8   58.79    5.40
   0   6   8   56.39    4.80
   1  -6  -9    3.90    1.40
  -1   6   9    4.60    0.90
   2  -6 -10    3.30    2.40
  -2   6  10    1.00    0.60
   3  -6 -11    0.70    1.00
  -3   6  11    0.90    0.50
   4  -6 -12   22.60    3.10
  -4   6  12   16.70    1.80
   5  -6 -13    1.80    1.30
  -5   6  13    2.10    0.60
   6  -6 -14    3.40    1.60
  -7   6  15   19.10    3.20
  -8   6  16    3.50    1.60
  -9   6  17   -0.50    1.40
 -10   6  18    4.10    2.00
 -11   6  19    0.60    1.30
 -12   6  20   -0.90    1.50
 -13   6  21   -0.80    1.50
 -17  -5   8    0.50    2.60
 -16  -5   7   -2.90    2.00
 -15  -5   6    0.80    2.10
 -14  -5   5    0.70    2.30
  14   5  -5    0.80    1.40
 -13  -5   4    0.40    2.10
  13   5  -4    2.80    2.20
 -12  -5   3    0.60    2.70
 -12  -5   3    0.40    1.70
  12   5  -3    1.00    1.20
 -11  -5   2   -0.50    2.10
 -11  -5   2   -0.20    1.50
  11   5  -2   -0.10    1.00
 -10  -5   1   -0.90    1.40
 -10  -5   1   -1.80    1.90
  10   5  -1    2.00    1.10
  -9  -5   0    0.10    1.80
  -9  -5   0   -1.80    1.20
   9   5   0    0.10    0.80
  -8  -5  -1    2.30    1.90
  -8  -5  -1    1.40    1.80
   8   5   1    0.80    0.80
  -7  -5  -2   29.00    5.00
   7   5   2   42.80    3.60
  -6  -5  -3   31.20    4.70
   6   5   3   25.90    2.70
  -5  -5  -4  145.39   13.20
   5   5   4  149.79   11.70
  -4  -5  -5   42.80    5.70
   4   5   5   46.00    4.00
  -3  -5  -6   -0.20    1.50
   3   5   6    0.30    0.60
  -2  -5  -7   56.29    5.60
   2   5   7   64.59    5.10
  -1  -5  -8   42.40    4.00
   1   5   8   38.70    3.40
   0  -5  -9    9.90    1.80
   0   5   9   11.60    1.40
   1  -5 -10   28.20    3.10
  -1   5  10   29.30    2.60
   2  -5 -11   10.70    2.00
  -2   5  11   17.20    1.60
   3  -5 -12    0.60    1.20
  -3   5  12    0.20    0.50
   4  -5 -13   75.59    6.90
  -4   5  13   77.19    6.10
   5  -5 -14    3.60    1.40
  -5   5  14    2.30    0.60
  -6   5  15   29.20    4.00
  -7   5  16   10.20    2.30
  -8   5  17    7.50    2.10
  -9   5  18    1.30    1.30
 -10   5  19    0.30    1.30
 -11   5  20   -0.90    1.10
 -12   5  21   -1.20    1.40
 -13   5  22    0.40    1.80
 -17  -4   7    2.00    2.30
 -16  -4   6   -1.10    1.90
 -15  -4   5   -0.40    1.50
 -14  -4   4    0.60    2.00
  14   4  -4   -1.70    1.40
 -13  -4   3   -1.20    1.60
  13   4  -3    0.00    1.20
 -12  -4   2    5.40    2.40
  12   4  -2    6.20    1.60
 -11  -4   1    1.60    2.00
  11   4  -1    0.20    1.10
  10   4   0   53.29    4.80
  -9  -4  -1   -0.20    1.30
   9   4   1    2.70    1.00
  -8  -4  -2   23.10    3.70
  -8  -4  -2   10.70    2.90
   8   4   2   14.50    1.90
  -7  -4  -3   40.40    6.10
  -7  -4  -3   48.50    5.70
   7   4   3   35.80    3.80
  -6  -4  -4   11.10    3.20
   6   4   4    7.60    1.30
  -5  -4  -5  232.38   18.50
   5   4   5  214.28   17.10
  -4  -4  -6    7.20    2.50
   4   4   6    4.80    0.90
  -3  -4  -7   39.30    4.50
   3   4   7   47.50    3.80
  -2  -4  -8  263.87   20.10
   2   4   8  249.18   19.60
  -1  -4  -9    3.20    1.10
   1   4   9    3.30    0.80
   0  -4 -10    0.90    0.90
   0   4  10    0.90    0.50
   1  -4 -11    3.40    1.10
  -1   4  11    3.90    0.80
   2  -4 -12   14.10    2.20
  -2   4  12   11.90    1.50
   3  -4 -13   29.70    3.70
  -3   4  13   23.30    2.30
   4  -4 -14  108.59    8.60
  -4   4  14   91.59    7.70
  -5   4  15   51.29    4.10
  -5   4  15   46.20    4.90
  -6   4  16    0.40    1.10
  -6   4  16    0.20    0.50
  -7   4  17   38.50    4.40
  -8   4  18    4.20    1.70
  -9   4  19    0.40    1.20
 -10   4  20    2.10    1.50
 -11   4  21    2.20    1.60
 -12   4  22   -1.60    1.10
 -13   4  23   -0.30    1.60
 -17  -3   6    1.80    2.50
 -16  -3   5   -1.20    2.00
 -15  -3   4   -0.90    1.80
 -14  -3   3    3.50    2.40
 -13  -3   2    5.30    2.10
  13   3  -2    8.40    1.80
 -12  -3   1    4.70    2.00
  12   3  -1   -2.60    0.90
 -11  -3   0    1.20    1.70
  11   3   0    1.50    1.20
 -10  -3  -1   18.50    3.30
  10   3   1   19.80    2.30
  -9  -3  -2   12.00    2.70
   9   3   2   10.60    1.60
  -8  -3  -3    0.60    1.60
   8   3   3    0.50    0.70
  -7  -3  -4   30.80    4.30
   7   3   4   23.50    2.50
  -6  -3  -5   52.69    6.10
   6   3   5   64.79    5.10
  -5  -3  -6    1.70    2.10
   5   3   6    0.50    0.60
  -4  -3  -7   33.60    4.50
   4   3   7   38.20    3.30
  -3  -3  -8    4.70    1.40
   3   3   8    9.00    1.20
  -2  -3  -9   21.10    2.50
   2   3   9   24.70    2.20
  -1  -3 -10   42.90    3.80
   1   3  10   38.10    3.50
   0  -3 -11   41.80    3.90
   0   3  11   41.90    3.60
   1  -3 -12    4.30    1.20
  -1   3  12    7.70    1.00
   2  -3 -13    7.20    1.50
  -2   3  13    6.00    1.00
   3  -3 -14  104.69    8.30
  -3   3  14   83.99    8.30
  -3   3  14   91.39    7.40
  -4   3  15    3.30    1.70
  -4   3  15    1.20    0.50
  -5   3  16    0.10    0.40
  -5   3  16    0.50    1.00
  -5   3  16    0.20    1.20
  -6   3  17    4.80    1.60
  -6   3  17    1.10    1.60
  -6   3  17    2.60    0.70
  -7   3  18    4.80    1.70
  -8   3  19    2.70    1.50
  -9   3  20    7.50    2.10
 -10   3  21    2.40    1.50
 -11   3  22   -0.90    1.30
 -12   3  23   -0.80    1.20
 -13   3  24   -0.10    1.50
 -18  -2   6    1.00    2.70
 -17  -2   5    1.50    2.50
 -16  -2   4    0.90    1.90
 -15  -2   3    1.20    1.90
 -14  -2   2    1.70    2.30
 -13  -2   1    2.50    1.80
  13   2  -1    1.20    1.20
 -12  -2   0    2.60    1.60
  12   2   0    0.30    1.00
 -11  -2  -1    5.20    2.10
  11   2   1    8.00    1.50
 -10  -2  -2   25.50    3.90
  10   2   2   21.60    2.60
  -9  -2  -3   69.39    6.60
   9   2   3   65.79    5.60
  -8  -2  -4   32.70    4.10
   8   2   4   22.00    2.40
  -7  -2  -5    1.60    1.60
   7   2   5   -0.70    0.60
  -6  -2  -6    8.50    2.40
   6   2   6    9.50    1.30
  -5  -2  -7   33.80    4.50
   5   2   7   33.30    3.00
  -4  -2  -8    0.80    1.50
   4   2   8    1.90    0.60
  -3  -2  -9   12.30    1.90
   3   2   9   13.80    1.60
  -2  -2 -10   19.00    2.10
   2   2  10    9.90    1.50
  -1  -2 -11   23.70    2.40
   1   2  11   22.70    2.20
   0  -2 -12    3.40    0.90
   0   2  12    4.20    0.80
   1  -2 -13   77.29    6.30
  -1   2  13   70.19    5.90
   2  -2 -14   23.70    2.60
  -2   2  14   24.90    2.30
  -3   2  15   33.00    3.00
  -4   2  16    6.80    1.00
  -4   2  16    7.00    1.70
  -5   2  17   23.30    4.10
  -5   2  17   16.70    1.80
  -5   2  17   18.30    2.80
  -6   2  18    2.80    0.70
  -6   2  18    2.80    1.30
  -6   2  18    1.60    1.80
  -7   2  19   11.50    2.40
  -7   2  19    5.70    2.50
  -8   2  20    0.00    1.80
  -8   2  20    0.10    1.10
  -9   2  21   -1.10    1.90
  -9   2  21    0.00    1.40
 -10   2  22   -0.50    1.10
 -11   2  23    2.90    1.60
 -12   2  24    1.20    1.70
 -13   2  25    2.40    2.00
 -18  -1   5    0.70    2.40
 -17  -1   4    6.50    2.90
 -16  -1   3    1.10    1.90
 -15  -1   2    0.50    1.90
 -14  -1   1    0.00    1.70
 -13  -1   0    2.10    1.70
  13   1   0   -0.10    1.00
 -12  -1  -1   19.00    3.40
  12   1   1   24.50    2.60
 -11  -1  -2   18.00    3.00
  11   1   2   15.70    2.10
 -10  -1  -3    9.60    2.20
  10   1   3    9.80    1.50
  -9  -1  -4   82.39    7.60
   9   1   4   85.89    6.90
  -8  -1  -5    5.20    1.90
   8   1   5    2.60    0.90
  -7  -1  -6  157.98   14.00
   7   1   6  181.28   13.30
  -6  -1  -7   57.69    5.70
   6   1   7   51.99    4.50
  -5  -1  -8    1.80    1.80
   5   1   8    2.50    0.70
  -4  -1  -9    5.90    1.60
   4   1   9    8.30    1.20
  -3  -1 -10    1.10    0.70
   3   1  10    0.50    0.50
  -2  -1 -11    8.90    1.30
   2   1  11    6.60    1.10
  -1  -1 -12   54.59    4.70
   1   1  12   57.39    4.60
   0  -1 -13   63.19    5.10
   0   1  13   54.39    4.80
   1  -1 -14   94.49    7.80
  -1   1  14   93.59    7.50
  -2   1  15    3.30    0.80
  -3   1  16  255.87   20.00
  -3   1  16  265.07   20.50
  -4   1  17   10.30    2.00
  -4   1  17   11.00    1.40
  -5   1  18   28.30    3.30
  -5   1  18   28.00    2.60
  -6   1  19    5.10    1.60
  -6   1  19    2.40    0.70
  -7   1  20    1.10    1.20
  -7   1  20    1.30    0.90
  -8   1  21    0.90    2.00
  -8   1  21   -0.50    0.90
  -9   1  22   -0.70    2.10
  -9   1  22    3.50    1.80
 -10   1  23   19.30    4.90
 -10   1  23   17.10    3.40
 -11   1  24    0.10    1.40
 -11   1  24    0.80    2.40
 -12   1  25    1.90    1.80
 -13   1  26    1.70    1.90
 -18   0   4    1.00    2.40
 -17   0   3    2.10    2.50
 -16   0   2   -0.10    1.90
 -15   0   1    4.70    2.30
 -14   0   0   17.40    3.40
 -13   0  -1    6.30    2.20
  13   0   1    4.90    1.40
 -12   0  -2    1.10    1.30
  12   0   2   -0.10    0.90
 -11   0  -3    3.00    1.50
  11   0   3    3.20    1.00
 -10   0  -4    1.60    1.30
  10   0   4    2.70    0.90
  -9   0  -5    9.30    2.10
   9   0   5    8.30    1.30
  -8   0  -6    3.40    1.60
   8   0   6    3.50    0.90
  -7   0  -7   20.50    3.00
   7   0   7   17.20    2.10
  -6   0  -8   62.69    5.70
   6   0   8   51.99    4.70
  -5   0  -9   10.10    2.20
   5   0   9    9.20    1.30
  -4   0 -10    0.70    0.80
   4   0  10    0.90    0.60
  -3   0 -11   39.30    3.50
   3   0  11   42.10    3.50
  -2   0 -12    5.10    0.90
   2   0  12    3.90    0.90
  -1   0 -13   58.79    4.80
   1   0  13   54.99    4.70
   0   0 -14   -0.40    0.60
   0   0  14   -0.60    0.40
  -1   0  15   13.70    2.00
  -1   0  15   17.00    1.90
  -2   0  16   87.99    7.00
  -2   0  16   82.99    7.30
  -3   0  17    0.20    0.70
  -3   0  17    2.20    0.70
  -4   0  18    2.70    1.10
  -4   0  18    1.00    0.60
  -5   0  19    3.10    1.20
  -5   0  19    1.60    0.80
  -6   0  20    0.20    0.60
  -6   0  20   -0.10    0.90
  -7   0  21    9.80    2.30
  -7   0  21   14.30    1.80
  -8   0  22   19.20    3.30
  -9   0  23   17.60    4.60
  -9   0  23   16.90    3.30
 -10   0  24    0.20    1.40
 -10   0  24   -1.50    1.90
 -11   0  25    1.30    2.70
 -11   0  25    1.00    1.50
 -12   0  26    0.40    2.70
 -12   0  26    0.90    1.50
 -18   1   3    3.60    2.60
 -17   1   2    1.90    2.20
 -16   1   1    3.40    2.20
 -15   1   0    4.00    2.00
 -14   1  -1    2.00    1.80
 -13   1  -2    2.20    1.60
 -12   1  -3   -0.10    1.20
  12  -1   3    0.60    0.90
 -11   1  -4    0.90    1.20
  11  -1   4    0.10    0.80
 -10   1  -5    2.00    1.20
  10  -1   5    1.90    0.90
  -9   1  -6    0.60    1.00
   9  -1   6   -0.60    0.60
  -8   1  -7   24.30    3.10
   8  -1   7   21.40    2.30
  -7   1  -8   14.60    2.80
   7  -1   8    8.10    1.60
  -6   1  -9   58.49    5.30
   6  -1   9   47.60    4.40
  -5   1 -10   53.59    5.10
   5  -1  10   59.39    4.80
  -4   1 -11   90.29    7.00
   4  -1  11   87.09    7.20
  -3   1 -12   59.49    5.00
   3  -1  12   66.59    5.20
  -2   1 -13  181.98   14.40
   2  -1  13  193.08   14.50
  -1   1 -14   99.59    7.50
   1  -1  14   87.49    7.50
   0  -1  15   14.50    1.70
   0  -1  15   11.70    1.70
  -1  -1  16  180.28   13.90
  -1  -1  16  175.38   14.00
  -2  -1  17   32.90    3.10
  -2  -1  17   35.20    3.40
  -3  -1  18    0.80    0.60
  -3  -1  18   -0.40    0.50
  -4  -1  19    0.60    0.70
  -4  -1  19   -1.00    0.40
  -5  -1  20    0.00    0.90
  -5  -1  20    1.40    0.70
  -6  -1  21    1.10    1.10
  -6  -1  21    1.60    0.80
  -7  -1  22   34.70    3.30
  -7  -1  22   32.80    4.00
  -8  -1  23    4.90    1.90
  -9  -1  24    6.90    2.30
 -10  -1  25   -0.80    1.20
 -11  -1  26    1.40    1.80
 -11  -1  26   -1.10    2.40
 -12  -1  27    1.00    2.60
 -12  -1  27    0.60    1.50
 -18   2   2   -0.80    2.00
 -17   2   1    2.10    2.10
 -16   2   0    0.10    1.70
 -15   2  -1   19.50    3.50
 -14   2  -2    6.90    2.60
 -13   2  -3   11.90    2.50
 -12   2  -4    2.20    1.40
  12  -2   4    2.70    1.00
 -11   2  -5    3.00    1.50
  11  -2   5    8.50    1.40
 -10   2  -6    6.90    1.60
  10  -2   6    5.40    1.20
  -9   2  -7    4.30    1.40
   9  -2   7    7.40    1.20
  -8   2  -8   24.50    3.30
   8  -2   8   35.00    2.90
  -7   2  -9   99.39    8.40
   7  -2   9   98.99    8.00
  -6   2 -10    9.80    2.60
   6  -2  10    0.60    0.80
  -5   2 -11    1.20    0.80
   5  -2  11    2.90    0.80
   4  -2  12    3.00    0.90
  -3   2 -13  216.78   16.10
   3  -2  13  204.68   16.40
   2  -2  14   24.90    2.20
   2  -2  14   25.60    2.50
   1  -2  15   34.00    3.00
   1  -2  15   30.40    2.80
   0  -2  16   86.49    6.90
   0  -2  16   80.19    6.80
  -1  -2  17   19.70    2.20
  -1  -2  17   21.00    2.30
  -2  -2  18   27.70    2.60
  -2  -2  18   23.10    2.60
  -3  -2  19    7.80    1.60
  -3  -2  19    5.10    1.10
  -4  -2  20    3.30    1.20
  -4  -2  20    2.70    0.90
  -5  -2  21    3.70    1.10
  -5  -2  21    5.50    1.60
  -6  -2  22    0.10    1.00
  -6  -2  22    0.30    0.80
  -7  -2  23   20.60    3.30
  -7  -2  23   13.90    4.50
  -7  -2  23   24.00    2.70
  -8  -2  24    4.40    1.80
  -9  -2  25    4.70    2.00
 -10  -2  26   16.40    3.40
 -11  -2  27    3.00    1.90
 -12  -2  28    2.20    1.90
 -12  -2  28   -0.70    2.90
 -17   3   0    1.80    2.00
 -16   3  -1    1.50    1.90
 -15   3  -2    1.10    1.70
 -14   3  -3   14.60    3.00
 -13   3  -4    0.90    1.40
 -12   3  -5    0.20    1.20
  12  -3   5    1.20    0.80
 -11   3  -6    8.60    1.80
  11  -3   6   12.10    1.70
 -10   3  -7    3.30    1.20
  10  -3   7    3.10    1.00
  -9   3  -8    1.00    0.90
   9  -3   8    2.00    0.80
  -8   3  -9   21.20    2.50
   8  -3   9   15.30    2.10
  -7   3 -10    7.70    1.70
   7  -3  10    5.50    1.10
  -6   3 -11   -1.70    1.20
   6  -3  11    0.40    0.70
   5  -3  12  112.69    9.10
   4  -3  13   34.50    3.30
   3  -3  14   95.49    7.40
   3  -3  14   97.59    7.90
   2  -3  15   59.39    4.80
   2  -3  15   51.99    4.40
   1  -3  16   46.00    3.80
   1  -3  16   41.60    4.00
   0  -3  17    1.50    0.80
   0  -3  17    0.30    0.50
  -1  -3  18   21.00    2.40
  -1  -3  18   19.50    2.20
  -2  -3  19    0.50    0.70
  -2  -3  19    2.20    0.90
  -3  -3  20   64.89    5.00
  -3  -3  20   49.20    5.10
  -4  -3  21   -0.40    0.80
  -4  -3  21    1.50    1.00
  -5  -3  22    4.20    1.20
  -5  -3  22    1.60    1.10
  -6  -3  23    6.90    1.90
  -6  -3  23   11.80    1.90
  -7  -3  24   11.40    2.50
  -7  -3  24    8.10    1.70
  -7  -3  24    7.70    3.80
  -8  -3  25   -0.50    1.20
  -8  -3  25   -0.70    1.20
  -9  -3  26   13.10    3.00
 -10  -3  27    8.70    2.60
 -11  -3  28    1.30    1.70
 -13   4  -5    3.90    1.80
 -12   4  -6    2.20    1.30
  12  -4   6    1.10    1.00
 -11   4  -7    4.20    1.40
  11  -4   7    3.20    1.10
 -10   4  -8    6.70    1.60
  10  -4   8    5.70    1.30
  -9   4  -9    0.00    0.70
   9  -4   9    0.90    0.80
  -8   4 -10   14.00    1.90
   8  -4  10    8.50    1.50
  -7   4 -11   12.20    2.00
   7  -4  11   16.60    2.00
   6  -4  12   15.40    2.00
   5  -4  13  120.79    9.70
   4  -4  14   86.89    7.20
   3  -4  15   68.39    5.80
   2  -4  16    1.30    0.50
   2  -4  16    2.40    0.90
   1  -4  17    6.10    1.30
   1  -4  17    4.90    0.90
   0  -4  18    2.80    0.80
   0  -4  18    1.40    0.80
  -1  -4  19    2.40    0.90
  -1  -4  19    1.50    0.90
  -2  -4  20    2.60    1.10
  -2  -4  20    5.60    1.30
  -3  -4  21    3.10    1.10
  -3  -4  21    3.60    1.20
  -4  -4  22    3.60    1.40
  -5  -4  23   13.40    2.50
  -6  -4  24    0.20    1.10
  -6  -4  24   -0.30    2.80
  -7  -4  25    3.60    1.70
  -7  -4  25    3.30    1.30
  -7  -4  25    3.10    3.70
  -8  -4  26   -0.90    3.00
  -8  -4  26    1.00    1.60
  -8  -4  26   -0.60    1.00
  -9  -4  27    0.90    1.40
 -10  -4  28    0.50    1.60
 -11  -4  29    0.10    1.70
  11  -5   8    4.60    1.20
  10  -5   9    1.90    1.00
   9  -5  10    9.60    1.60
   8  -5  11    3.10    1.00
   7  -5  12   34.40    3.30
   6  -5  13   28.20    2.80
   5  -5  14    0.70    0.70
   4  -5  15   41.70    3.90
   3  -5  16   23.40    2.80
   2  -5  17    1.60    0.60
   2  -5  17    2.10    0.90
   1  -5  18   14.50    2.00
   1  -5  18   10.50    1.50
   0  -5  19    0.70    0.80
   0  -5  19    0.20    0.60
  -1  -5  20    2.10    0.90
  -1  -5  20    3.70    1.10
  -2  -5  21    2.50    1.10
  -3  -5  22    3.30    1.30
  -4  -5  23   18.80    3.00
  -5  -5  24    3.60    1.60
  -6  -5  25    0.40    1.20
  -6  -5  25   -0.80    2.90
  -7  -5  26   12.80    5.20
  -7  -5  26    4.70    2.00
  -8  -5  27    0.30    1.50
  -9  -5  28    1.10    1.70
 -10  -5  29    3.70    2.00
  11  -6   9    1.30    0.90
  10  -6  10    1.90    1.00
   9  -6  11   20.50    2.60
   8  -6  12   10.60    1.80
   7  -6  13    1.20    0.90
   6  -6  14   11.60    1.80
   5  -6  15   12.00    1.80
   4  -6  16   -0.80    0.60
   3  -6  17    3.30    1.10
   2  -6  18   -0.20    0.80
   1  -6  19    0.70    0.90
   0  -6  20    0.60    1.00
  -1  -6  21    1.50    1.00
  -2  -6  22   11.60    2.10
  -3  -6  23    4.20    1.40
  -4  -6  24    0.90    1.20
  -5  -6  25    5.70    1.90
  -5  -6  25    2.10    3.40
  -6  -6  26    3.90    1.80
  -6  -6  26    3.60    3.60
  -7  -6  27    1.90    1.50
  -7  -6  27   -4.30    3.20
  -8  -6  28    0.10    1.40
  -9  -6  29   -0.50    1.60
  11  -7  10   -1.60    0.90
  10  -7  11    3.70    1.10
   9  -7  12    2.40    1.10
   8  -7  13    1.90    1.10
   7  -7  14    4.50    1.30
   6  -7  15   -0.30    0.90
   5  -7  16   19.60    2.50
   4  -7  17    0.60    1.00
   3  -7  18   24.20    3.00
   2  -7  19    0.60    1.00
   1  -7  20   -1.40    0.70
   3   7 -24    4.00    2.10
   4   7 -25    0.00    1.40
  -4  -7  25    1.70    3.40
   5   7 -26    3.40    1.60
  -5  -7  26   -0.50    3.00
  -6  -7  27    2.40    4.20
  11  -8  11    2.20    1.30
  10  -8  12    3.90    1.50
   9  -8  13   -0.40    1.00
   8  -8  14    0.90    1.10
   7  -8  15   -0.60    0.80
   6  -8  16    0.00    0.90
   5  -8  17    5.40    1.50
   4  -8  18    0.90    1.00
   3  -8  19    5.00    1.50
   2  -8  20    0.80    1.10
   1  -8  21   14.20    2.40
   2   8 -24   -0.20    1.40
   3   8 -25    4.40    1.60
  -3  -8  25   -0.60    3.00
   4   8 -26    1.00    1.50
  -4  -8  26    1.90    3.70
   5   8 -27   -2.60    1.30
  -5  -8  27    3.50    4.10
   6   8 -28    1.50    1.70
  -6  -8  28    3.80    4.70
  10  -9  13    1.30    1.10
   9  -9  14    8.60    1.80
   8  -9  15    9.30    2.10
   7  -9  16    3.30    1.40
   6  -9  17   -0.90    0.90
   5  -9  18    8.10    1.80
   4  -9  19    4.80    1.50
   3  -9  20    1.60    1.20
   2  -9  21    1.60    1.30
   2   9 -25   -0.50    1.50
  -2  -9  25    2.50    4.00
   3   9 -26    4.20    2.00
  -3  -9  26    3.10    3.90
   4   9 -27    3.00    1.80
  -4  -9  27    1.80    4.30
   5   9 -28    8.00    2.30
  -5  -9  28    8.40    5.20
   6   9 -29    5.70    2.60
  10 -10  14    4.80    1.60
   9 -10  15    8.10    1.80
   8 -10  16    1.30    1.20
   7 -10  17    2.30    1.30
   6 -10  18    0.60    1.20
   5 -10  19    0.20    1.20
   4 -10  20    3.50    1.60
   3 -10  21   -1.00    1.10
   2 -10  22    0.50    1.40
  -1 -10  25    1.10    3.80
   2  10 -26   -2.40    1.70
  -2 -10  26    0.60    3.60
   3  10 -27    0.90    1.70
  -3 -10  27    1.00    4.10
   4  10 -28    1.10    1.70
  -4 -10  28    2.90    4.70
   5  10 -29    3.20    2.40
  10 -11  15   -0.30    1.20
   9 -11  16    0.70    1.50
   8 -11  17   -2.00    1.00
   7 -11  18   -0.50    1.10
   6 -11  19    2.50    1.50
   5 -11  20    1.50    1.30
   4 -11  21    1.30    1.20
   3 -11  22    3.60    1.60
   2 -11  23    0.70    1.40
   1 -11  24    5.10    4.60
   0 -11  25    6.90    5.20
  -1 -11  26    6.50    4.50
   2  11 -27   -1.60    1.60
  -2 -11  27   -1.90    3.60
   3  11 -28   -2.50    2.20
  -3 -11  28    1.70    4.40
  -4 -11  29    1.50    4.60
   9 -12  17   -0.80    1.30
   8 -12  18   -1.50    1.20
   7 -12  19    1.70    1.40
   6 -12  20   -0.40    1.20
   5 -12  21    1.70    1.60
   4 -12  22    8.90    2.20
   3 -12  23    8.90    2.20
   3 -12  23    7.00    4.70
   2 -12  24    0.70    4.40
   2 -12  24    2.90    1.80
   1 -12  25    0.70    4.00
   0 -12  26   12.90    6.40
  -1 -12  27    2.60    5.10
  -2 -12  28    2.90    4.60
   9 -13  18   -0.70    1.30
   8 -13  19   -0.90    1.40
   7 -13  20    0.00    1.40
   6 -13  21   -0.90    3.90
   6 -13  21   -0.20    1.50
   5 -13  22   -1.90    3.70
   5 -13  22    0.80    1.50
   4 -13  23    1.00    3.80
   4 -13  23    1.80    1.70
   3 -13  24   -0.50    1.30
   3 -13  24   -0.30    3.70
   2 -13  25   -1.80    4.00
   2 -13  25   -2.00    1.50
   1 -13  26    3.40    5.40
   1 -13  26    3.90    2.10
   3  18  -5    1.10    2.20
   2  18  -4    3.30    2.30
   1  18  -3    4.20    2.40
   0  18  -2    5.40    2.40
  -1  18  -1   -2.30    1.80
  -6 -17   7    3.70    5.10
   6  17  -7    1.30    2.20
  -5 -17   6    7.30    4.40
   5  17  -6    1.10    2.20
  -4 -17   5   -1.10    3.30
   4  17  -5    0.90    1.90
  -3 -17   4    8.20    3.90
   3  17  -4    2.70    2.10
  -2 -17   3    5.60    3.10
   2  17  -3    0.40    1.90
  -1 -17   2    5.60    3.00
   1  17  -2    1.30    1.90
   0 -17   1   10.70    3.60
   0  17  -1   16.20    2.90
   1 -17   0    0.80    2.50
  -1  17   0    1.20    1.50
   2 -17  -1    5.90    2.80
  -2  17   1    4.40    1.90
   3 -17  -2   -0.30    2.20
  -8 -16   8    1.20    6.00
   8  16  -8   -2.30    2.30
  -7 -16   7   -5.60    5.00
   7  16  -7    1.90    1.80
  -6 -16   6    3.00    4.80
   6  16  -6   -0.40    1.60
  -5 -16   5    1.60    4.00
   5  16  -5    3.60    2.20
  -4 -16   4    4.90    3.90
   4  16  -4    2.00    1.90
  -3 -16   3    5.50    4.10
   3  16  -3    2.60    2.10
  -2 -16   2    2.30    3.60
   2  16  -2    6.60    2.40
  -1 -16   1    1.20    2.70
   1  16  -1    0.70    1.70
   0 -16   0    1.50    2.70
   0  16   0    0.70    1.40
   1 -16  -1    3.50    2.50
  -1  16   1    3.40    1.80
   2 -16  -2    1.40    2.50
  -2  16   2    1.00    1.40
   3 -16  -3   -3.20    2.10
   4 -16  -4    1.70    2.20
   5 -16  -5   -0.70    1.90
   6 -16  -6   -0.60    2.00
   7 -16  -7   -1.10    2.30
   8 -16  -8   -1.10    2.40
 -10 -15   9   -5.60    4.60
  -9 -15   8   -4.60    4.40
   9  15  -8    3.70    2.50
  -8 -15   7   -3.50    5.00
   8  15  -7   -1.60    1.90
  -7 -15   6   -0.70    4.70
   7  15  -6    0.70    1.80
  -6 -15   5    1.00    5.10
   6  15  -5   -1.10    1.70
  -5 -15   4    2.10    4.10
   5  15  -4   -0.10    1.60
  -4 -15   3   -0.10    3.30
   4  15  -3    2.60    1.90
  -3 -15   2    2.40    3.20
   3  15  -2   -1.40    1.40
  -2 -15   1   25.80    4.90
   2  15  -1   14.50    2.80
  -1 -15   0    2.10    2.50
   1  15   0   -0.40    1.30
   0 -15  -1    7.00    3.00
   0  15   1    3.60    1.70
   1 -15  -2    1.90    2.20
  -1  15   2    2.20    1.40
   2 -15  -3   -2.10    1.80
  -2  15   3    0.20    1.30
   3 -15  -4    0.00    1.80
  -3  15   4   -0.40    1.40
   4 -15  -5    0.50    1.90
   5 -15  -6    1.00    2.20
   6 -15  -7    3.50    2.30
   7 -15  -8    0.30    2.00
   8 -15  -9   -2.60    2.10
   9 -15 -10    0.90    2.90
 -11 -14   9    3.00    5.20
  11  14  -9    3.10    2.50
 -10 -14   8   -2.60    3.70
  10  14  -8    0.60    2.20
  -9 -14   7    2.40    4.40
   9  14  -7    0.90    1.90
  -8 -14   6    1.50    4.80
   8  14  -6   -0.30    1.80
  -7 -14   5    0.70    4.50
   7  14  -5    0.70    1.90
  -6 -14   4    6.60    5.30
   6  14  -4    0.90    1.60
  -5 -14   3    0.90    3.90
   5  14  -3   -0.60    1.40
  -4 -14   2   21.60    5.20
   4  14  -2   12.20    2.70
  -3 -14   1   19.10    5.30
  -2 -14   0   -0.90    3.90
   2  14   0    3.60    2.10
  -1 -14  -1    2.00    3.80
   1  14   1    2.30    1.80
   0 -14  -2    5.40    4.00
   0  14   2    2.80    1.80
   1 -14  -3    0.70    3.00
  -1  14   3   -0.30    1.70
   2 -14  -4   -2.70    2.00
  -2  14   4    2.40    1.50
   3 -14  -5    1.20    2.00
  -3  14   5    2.50    1.30
   4 -14  -6   -0.30    1.60
   5 -14  -7   -0.30    1.70
   6 -14  -8    3.60    2.20
   7 -14  -9    6.30    3.00
   8 -14 -10    0.50    2.30
   9 -14 -11    0.30    2.30
 -10  14  12    1.70    2.10
 -12 -13   9   -0.50    4.60
  12  13  -9   -0.30    2.40
 -11 -13   8   -0.10    3.70
  11  13  -8    2.60    2.10
 -10 -13   7    2.20    4.40
  10  13  -7   -1.30    1.80
  -9 -13   6   -4.20    3.40
   9  13  -6    1.20    1.70
  -8 -13   5   -1.00    3.80
   8  13  -5    1.80    1.70
  -7 -13   4    4.40    4.20
   7  13  -4    0.90    1.50
  -6 -13   3    4.50    4.70
   6  13  -3    3.50    1.80
  -5 -13   2    9.90    5.10
   5  13  -2   -1.20    1.70
  -4 -13   1    2.70    3.40
   4  13  -1    0.10    1.10
  -3 -13   0   -1.60    2.50
   3  13   0   -0.20    1.20
  -2 -13  -1    1.30    2.30
   2  13   1    2.60    1.40
  -1 -13  -2    1.50    2.00
   1  13   2    0.10    1.10
   0 -13  -3   -0.70    1.70
   0  13   3   -0.20    1.00
   1 -13  -4    6.70    2.40
  -1  13   4    7.50    1.70
   2 -13  -5    0.40    1.70
  -2  13   5    0.20    1.00
   3 -13  -6   -2.60    1.40
  -3  13   6   -0.80    0.80
   4 -13  -7   -1.30    2.80
   5 -13  -8    9.40    2.80
   6 -13  -9    7.40    2.70
   7 -13 -10   -2.10    1.70
   8 -13 -11   -3.10    2.10
   9 -13 -12    7.10    3.10
 -10  13  13   -1.50    1.60
 -11  13  14   -2.70    1.60
 -13 -12   9   -0.20    3.50
  13  12  -9   -4.70    2.20
 -12 -12   8   -4.10    3.50
  12  12  -8   -1.30    1.70
 -11 -12   7    1.20    4.10
  11  12  -7    1.30    1.90
 -10 -12   6   -1.30    3.40
  10  12  -6    2.70    1.90
  -9 -12   5    1.20    3.60
   9  12  -5    1.80    1.70
  -8 -12   4   38.50    7.90
   8  12  -4   55.59    5.30
  -7 -12   3   -2.00    4.10
   7  12  -3    0.00    1.90
  -6 -12   2    4.20    4.50
   6  12  -2    1.10    1.40
  -5 -12   1   17.20    5.20
   5  12  -1   15.50    2.50
  -4 -12   0   31.30    5.80
   4  12   0   33.10    3.90
  -3 -12  -1   -0.10    2.40
   3  12   1   -0.60    0.90
  -2 -12  -2    4.10    2.50
   2  12   2    3.20    1.30
  -1 -12  -3    0.20    1.90
   1  12   3   -0.10    0.90
   0 -12  -4    5.80    2.00
   0  12   4    4.50    1.30
   1 -12  -5   20.80    3.50
  -1  12   5   18.80    2.50
   2 -12  -6    3.10    1.90
  -2  12   6    0.40    0.90
   3 -12  -7   -1.00    1.20
  -3  12   7    0.50    0.90
   4 -12  -8   -1.20    1.30
   5 -12  -9   -1.70    1.70
   6 -12 -10   10.10    2.90
   7 -12 -11    1.30    2.20
   8 -12 -12    1.10    2.10
 -10  12  14    0.90    1.90
 -11  12  15    1.70    2.00
 -14 -11   9    2.90    4.00
  14  11  -9   -0.80    2.10
 -13 -11   8   -4.40    2.50
  13  11  -8    2.00    2.00
 -12 -11   7    2.30    3.70
  12  11  -7    0.20    1.80
 -11 -11   6   -2.70    3.00
  11  11  -6    0.80    1.70
 -10 -11   5   -2.40    3.10
  10  11  -5   -0.50    1.50
  -9 -11   4    1.10    3.80
   9  11  -4    3.10    1.70
  -8 -11   3   -2.20    3.40
   8  11  -3    2.70    1.60
  -7 -11   2   19.50    5.10
   7  11  -2   21.70    2.90
  -6 -11   1   -3.20    3.10
   6  11  -1    1.70    1.10
  -5 -11   0    1.70    3.10
   5  11   0   -1.10    0.80
  -4 -11  -1   10.20    4.20
   4  11   1    8.10    1.80
  -3 -11  -2    5.40    2.80
   3  11   2   -0.40    1.00
  -2 -11  -3    6.60    2.60
   2  11   3    6.90    1.50
  -1 -11  -4    1.70    1.80
   1  11   4    2.50    1.10
   0 -11  -5    2.80    1.90
   0  11   5    0.50    0.80
   1 -11  -6   46.80    5.10
  -1  11   6   44.60    4.20
   2 -11  -7   14.30    3.00
  -2  11   7   17.50    2.20
   3 -11  -8    1.20    1.60
  -3  11   8    2.00    1.00
   4 -11  -9    1.00    1.50
  -4  11   9    0.10    0.70
   5 -11 -10    0.60    1.70
   6 -11 -11    1.00    2.00
   7 -11 -12    0.20    2.00
   8 -11 -13   -0.30    1.80
  -9  11  14    1.60    1.80
 -10  11  15    0.60    1.80
 -11  11  16   -0.20    1.70
 -12  11  17   -1.70    1.80
 -15 -10   9   -2.50    3.80
 -15 -10   9   -2.00    3.00
 -14 -10   8    0.40    3.20
  14  10  -8    2.90    1.90
 -13 -10   7   -0.40    3.00
  13  10  -7    6.10    2.10
 -12 -10   6    1.20    2.60
  12  10  -6    2.60    1.80
 -11 -10   5    0.60    2.80
  11  10  -5    1.90    1.70
 -10 -10   4    0.80    3.80
  10  10  -4   -1.40    1.60
  -9 -10   3   11.40    4.00
   9  10  -3    9.50    2.00
  -8 -10   2    4.90    3.50
   8  10  -2    3.20    1.30
  -7 -10   1    9.30    4.00
   7  10  -1    8.20    1.60
  -6 -10   0   17.70    5.30
   6  10   0   19.90    2.70
  -5 -10  -1    1.30    3.20
   5  10   1   -0.60    0.70
  -4 -10  -2    1.60    2.70
   4  10   2    2.20    1.00
  -3 -10  -3    5.00    2.50
   3  10   3   11.50    1.70
  -2 -10  -4    8.90    2.50
   2  10   4   10.50    1.70
  -1 -10  -5   -1.10    1.40
   1  10   5    2.40    0.90
   0 -10  -6   -0.30    1.10
   0  10   6    0.20    0.70
   1 -10  -7   37.20    4.10
  -1  10   7   35.80    3.40
   2 -10  -8    9.80    2.30
  -2  10   8    7.70    1.40
   3 -10  -9    1.10    1.60
  -3  10   9   -0.10    0.70
   4 -10 -10    8.70    2.40
  -4  10  10   11.40    1.50
   5 -10 -11    0.30    1.50
   6 -10 -12    4.20    1.80
   7 -10 -13    6.50    3.00
   8 -10 -14    9.10    2.90
  -9  10  15    5.20    2.30
 -10  10  16    3.10    2.10
 -11  10  17    2.00    1.90
 -12  10  18    0.00    1.80
 -15  -9   8   -1.00    2.90
 -15  -9   8   -3.30    3.20
  15   9  -8   -0.10    2.00
 -14  -9   7   -1.10    3.20
 -14  -9   7   -0.10    2.90
  14   9  -7   -0.80    1.60
 -13  -9   6    0.50    2.80
  13   9  -6   -0.90    1.70
 -12  -9   5    3.80    2.90
  12   9  -5    5.90    1.90
 -11  -9   4    8.30    3.90
  11   9  -4   19.60    2.80
 -10  -9   3   15.00    4.20
  10   9  -3   24.90    3.00
  -9  -9   2    0.40    2.60
   9   9  -2    3.10    1.30
  -8  -9   1    0.30    2.80
   8   9  -1    6.80    1.50
  -7  -9   0    2.70    3.10
   7   9   0    1.00    1.00
  -6  -9  -1   15.10    4.60
   6   9   1    6.70    1.40
  -5  -9  -2   -0.90    2.70
   5   9   2    1.30    1.00
  -4  -9  -3    4.20    2.90
   4   9   3    6.40    1.30
  -3  -9  -4   12.90    3.20
   3   9   4    9.30    1.60
  -2  -9  -5   -1.10    1.30
   2   9   5    2.30    1.00
  -1  -9  -6    1.10    1.30
   1   9   6    1.90    0.90
   0  -9  -7   12.10    2.40
   0   9   7   12.90    1.80
   1  -9  -8    7.30    2.00
  -1   9   8    6.40    1.30
   2  -9  -9   10.10    2.20
  -2   9   9   14.00    1.70
   3  -9 -10   77.59    6.70
  -3   9  10   64.29    5.70
   4  -9 -11   61.99    6.20
  -4   9  11   62.09    5.10
   5  -9 -12    2.40    1.80
   6  -9 -13   13.90    2.90
   7  -9 -14   43.30    5.70
  -9   9  16    1.80    1.90
 -10   9  17    0.60    1.60
 -11   9  18    0.20    1.60
 -12   9  19    1.60    2.10
 -16  -8   8    0.90    3.50
 -16  -8   8   -1.40    4.20
 -15  -8   7    0.20    2.70
 -15  -8   7    3.40    4.10
  15   8  -7   -1.20    1.50
 -14  -8   6   -1.00    3.60
 -14  -8   6    4.30    3.40
  14   8  -6   -0.50    1.60
 -13  -8   5    5.60    4.20
 -13  -8   5    7.60    3.50
  13   8  -5    6.50    2.00
 -12  -8   4   -0.70    2.20
 -12  -8   4   -1.70    2.70
  12   8  -4   -2.60    1.30
 -11  -8   3    9.40    3.50
  11   8  -3   10.00    2.10
 -10  -8   2    2.80    2.60
  10   8  -2    4.10    1.40
  -9  -8   1    0.30    2.40
   9   8  -1    2.20    1.10
  -8  -8   0    4.50    2.90
   8   8   0   12.00    2.00
  -7  -8  -1   -1.50    2.40
   7   8   1    5.40    1.30
  -5  -8  -3  231.48   19.90
   5   8   3  229.08   18.00
  -4  -8  -4   65.79    6.90
   4   8   4   50.29    4.80
  -3  -8  -5    6.40    2.50
   3   8   5    2.90    1.00
  -2  -8  -6   10.80    2.60
   2   8   6   12.00    1.80
  -1  -8  -7   24.40    3.40
   1   8   7   22.80    2.40
   0  -8  -8   23.60    3.20
   0   8   8   20.30    2.40
   1  -8  -9    9.70    2.20
  -1   8   9   10.60    1.50
   2  -8 -10   44.40    4.50
  -2   8  10   39.70    3.70
   3  -8 -11    0.00    1.10
  -3   8  11    0.30    0.60
   4  -8 -12    8.40    2.00
  -4   8  12    3.00    0.90
   5  -8 -13   -0.60    1.60
   6  -8 -14    1.70    1.70
   7  -8 -15    0.40    1.50
  -8   8  16   -1.60    1.30
  -9   8  17    1.70    1.80
 -10   8  18    0.50    1.50
 -11   8  19   -0.20    1.60
 -12   8  20   -0.60    1.50
 -13   8  21   -0.80    1.70
 -16  -7   7    5.60    3.60
 -15  -7   6   -1.00    2.50
 -15  -7   6    5.40    4.20
  15   7  -6   -1.30    1.80
 -14  -7   5    1.10    2.70
 -14  -7   5    0.30    3.40
  14   7  -5    0.80    1.60
 -13  -7   4    3.40    3.20
 -13  -7   4    1.20    2.50
  13   7  -4   -0.20    1.40
 -12  -7   3    8.50    3.90
 -12  -7   3    9.40    3.30
  12   7  -3    9.70    2.50
 -11  -7   2   -2.20    2.40
 -11  -7   2   -0.70    2.10
  11   7  -2   -0.70    1.00
 -10  -7   1    4.10    2.70
  10   7  -1    0.70    1.10
  -9  -7   0   -2.20    1.70
   9   7   0    0.70    1.20
  -8  -7  -1    6.60    3.30
   8   7   1   11.80    1.80
  -7  -7  -2    6.30    3.20
   7   7   2    8.70    1.50
  -6  -7  -3   -1.30    2.10
   6   7   3   -0.40    0.70
  -5  -7  -4    3.60    3.00
   5   7   4    2.90    1.00
  -4  -7  -5    4.30    2.60
   4   7   5    4.70    1.20
  -3  -7  -6    5.00    3.20
   3   7   6    0.80    1.10
  -2  -7  -7  282.57   23.00
   2   7   7  290.47   22.10
  -1  -7  -8   16.70    3.40
   1   7   8   12.10    1.80
   0  -7  -9    9.70    2.20
   0   7   9   15.70    1.90
   1  -7 -10   70.19    6.50
  -1   7  10   71.89    5.90
   2  -7 -11   67.59    6.70
  -2   7  11   81.39    6.20
   3  -7 -12    0.40    1.10
  -3   7  12    0.90    0.60
   4  -7 -13    4.00    1.60
  -4   7  13    4.80    0.90
   5  -7 -14   -0.40    1.10
   6  -7 -15    1.20    1.40
  -7   7  16   24.70    3.80
  -8   7  17    5.20    2.00
  -9   7  18   10.20    2.60
 -10   7  19   -2.10    1.10
 -11   7  20   -0.80    1.60
 -12   7  21   -1.20    1.10
 -13   7  22    0.40    1.50
 -17  -6   7   -2.30    2.80
 -16  -6   6   -0.80    2.20
 -15  -6   5    2.60    2.70
 -14  -6   4    1.50    2.30
  14   6  -4    1.80    1.60
 -13  -6   3    4.70    3.80
 -13  -6   3    0.00    2.40
  13   6  -3   -2.50    1.30
 -12  -6   2    1.60    2.80
 -12  -6   2    3.80    2.40
  12   6  -2   -0.20    1.20
 -11  -6   1    0.10    2.10
 -11  -6   1    1.70    2.50
  11   6  -1   -1.40    0.90
 -10  -6   0    0.70    2.50
 -10  -6   0    3.90    2.50
  10   6   0    0.70    1.20
  -9  -6  -1    2.70    2.30
  -9  -6  -1    1.20    2.20
   9   6   1    2.20    1.10
  -8  -6  -2   30.90    5.40
   8   6   2   42.70    3.80
  -7  -6  -3    1.60    2.30
   7   6   3    1.50    0.90
  -6  -6  -4    2.40    2.70
   6   6   4    0.10    0.80
  -5  -6  -5   74.39    8.50
   5   6   5   49.20    4.80
  -4  -6  -6   57.79    6.30
   4   6   6   47.80    4.40
  -3  -6  -7   80.89    7.60
   3   6   7   84.29    6.80
  -2  -6  -8   19.10    2.90
   2   6   8   15.30    1.90
  -1  -6  -9   63.49    5.70
   1   6   9   59.79    5.10
   0  -6 -10   13.20    2.30
   0   6  10    8.30    1.40
   1  -6 -11   -0.50    1.90
  -1   6  11   -0.10    0.70
   2  -6 -12   81.99    7.00
  -2   6  12   76.79    6.30
   3  -6 -13   12.30    2.20
  -3   6  13   11.40    1.40
   4  -6 -14    3.90    1.50
  -4   6  14    2.20    0.70
   5  -6 -15    8.80    2.00
  -5   6  15    9.20    1.20
  -7   6  17    5.80    2.00
  -8   6  18    5.10    2.00
  -9   6  19    3.30    1.70
 -10   6  20   -1.50    1.20
 -11   6  21    3.80    2.20
 -12   6  22   -0.80    1.70
 -13   6  23   -0.50    1.50
 -17  -5   6   -1.40    2.40
 -16  -5   5    0.20    2.50
 -15  -5   4    5.20    3.00
 -14  -5   3    0.50    2.40
  14   5  -3    1.00    1.50
 -13  -5   2    1.50    2.20
  13   5  -2   -0.10    2.00
 -12  -5   1    1.90    2.20
  12   5  -1    3.20    1.40
 -11  -5   0    0.60    1.70
  11   5   0    0.20    1.10
 -10  -5  -1    2.30    2.20
 -10  -5  -1   -1.70    1.70
  10   5   1    0.20    1.00
  -9  -5  -2   16.90    3.70
  -9  -5  -2   14.80    3.60
   9   5   2   15.40    2.10
  -8  -5  -3    4.00    2.00
  -8  -5  -3    3.90    2.60
   8   5   3    4.70    1.20
  -7  -5  -4   33.20    4.10
  -7  -5  -4   19.80    4.50
   7   5   4   20.70    2.60
  -6  -5  -5   31.30    6.00
   6   5   5   36.30    3.60
  -5  -5  -6    7.00    3.10
   5   5   6   12.60    1.60
  -4  -5  -7   -3.20    1.40
   4   5   7    3.10    0.80
  -3  -5  -8   11.40    2.30
   3   5   8   10.40    1.50
  -2  -5  -9   60.59    5.30
   2   5   9   50.79    4.60
  -1  -5 -10   59.09    5.40
   1   5  10   58.79    4.90
   0  -5 -11   15.90    2.50
   0   5  11   17.40    2.00
   1  -5 -12    0.60    1.20
  -1   5  12    0.70    0.60
   2  -5 -13    4.30    1.60
  -2   5  13    4.20    0.90
   3  -5 -14   38.10    4.30
  -3   5  14   46.10    3.70
   4  -5 -15   47.50    4.90
  -4   5  15   48.30    4.00
   5  -5 -16   39.30    4.70
  -5   5  16   49.20    3.80
  -6   5  17    7.10    2.10
  -7   5  18    0.70    1.10
  -8   5  19    1.50    1.50
  -9   5  20    5.00    2.20
 -10   5  21   -0.30    1.10
 -11   5  22    0.20    1.40
 -12   5  23    0.60    1.50
 -13   5  24   -0.20    1.90
 -17  -4   5    0.00    2.40
 -16  -4   4    1.20    2.40
 -15  -4   3    2.40    2.40
 -14  -4   2    0.80    1.90
  14   4  -2    4.00    1.70
 -13  -4   1    4.10    2.50
  13   4  -1    0.20    1.40
 -12  -4   0    1.20    1.90
  12   4   0    1.00    1.20
 -11  -4  -1    2.10    2.20
  11   4   1    2.00    1.20
 -10  -4  -2    2.50    2.00
  10   4   2   -0.50    0.80
  -9  -4  -3   19.80    3.90
   9   4   3   21.10    2.50
  -8  -4  -4   33.60    4.80
   8   4   4   32.80    3.20
  -7  -4  -5   31.00    5.00
   7   4   5   30.40    3.00
  -6  -4  -6   31.00    5.40
   6   4   6   48.80    3.90
  -5  -4  -7   77.89    7.70
   5   4   7   75.29    6.30
  -4  -4  -8   -0.50    1.60
   4   4   8    0.10    0.60
  -3  -4  -9    0.20    1.10
   3   4   9    1.00    0.60
  -2  -4 -10   37.20    3.70
   2   4  10   33.60    3.10
  -1  -4 -11   91.29    7.70
   1   4  11   90.19    7.30
   0  -4 -12    2.10    1.00
   0   4  12    2.50    0.70
   1  -4 -13   86.99    7.50
  -1   4  13   88.79    7.10
   2  -4 -14   13.90    2.50
  -2   4  14   16.00    1.80
   3  -4 -15   72.49    6.60
  -3   4  15   71.69    5.80
   4  -4 -16   23.00    3.40
  -4   4  16   25.40    2.30
  -5   4  17   14.80    1.70
  -5   4  17   15.50    2.70
  -6   4  18    0.70    1.30
  -7   4  19    1.90    1.50
  -8   4  20    4.00    1.80
  -9   4  21    2.50    1.60
 -10   4  22    0.90    1.40
 -11   4  23    2.70    1.70
 -12   4  24   -0.40    1.60
 -13   4  25    1.10    1.90
 -18  -3   5    2.30    3.20
 -17  -3   4   -0.60    2.30
 -16  -3   3    0.90    2.50
 -15  -3   2    1.10    2.20
 -14  -3   1   -1.80    2.10
  14   3  -1    0.20    1.60
 -13  -3   0   -2.20    1.60
  13   3   0   -2.40    1.10
 -12  -3  -1    0.30    1.60
  12   3   1   -1.50    1.00
 -11  -3  -2    7.40    2.60
  11   3   2    9.40    1.80
 -10  -3  -3    2.20    2.00
  10   3   3    9.50    1.50
  -9  -3  -4   10.00    2.70
   9   3   4    5.50    1.20
  -8  -3  -5    1.80    2.00
   8   3   5    0.00    0.70
  -7  -3  -6   18.00    4.60
   7   3   6   12.90    2.00
  -6  -3  -7   40.70    5.50
   6   3   7   40.50    3.60
  -5  -3  -8    6.50    2.50
   5   3   8    8.10    1.30
  -4  -3  -9   82.19    7.50
   4   3   9   83.79    6.70
  -3  -3 -10   48.50    4.60
   3   3  10   49.10    4.20
  -2  -3 -11    4.40    1.20
   2   3  11    1.80    0.70
  -1  -3 -12   66.79    5.90
   1   3  12   69.99    5.60
   0  -3 -13  131.39   10.30
   0   3  13  122.29   10.00
   1  -3 -14    7.10    1.50
  -1   3  14    4.70    1.00
   2  -3 -15   55.39    5.50
  -2   3  15   61.49    4.90
   3  -3 -16    7.90    1.70
  -3   3  16    4.90    0.90
  -3   3  16    3.70    1.70
  -4   3  17    1.70    1.60
  -4   3  17    0.80    1.00
  -4   3  17    2.00    0.60
  -5   3  18   12.20    3.00
  -5   3  18   16.00    1.80
  -5   3  18   17.90    2.90
  -6   3  19   11.00    3.10
  -6   3  19   10.80    1.60
  -6   3  19   12.00    2.40
  -7   3  20   36.00    4.10
  -7   3  20   25.20    4.90
  -8   3  21    2.50    1.50
  -9   3  22    1.20    1.40
 -10   3  23    1.90    1.50
 -11   3  24    0.10    1.70
 -12   3  25    1.20    1.70
 -18  -2   4    5.70    3.30
 -17  -2   3    2.10    2.40
 -16  -2   2    0.70    2.10
 -15  -2   1    1.60    2.10
 -14  -2   0    3.10    2.70
  14   2   0    5.10    3.20
 -13  -2  -1    4.60    2.20
  13   2   1    2.60    1.30
 -12  -2  -2   -2.80    1.30
  12   2   2    1.40    1.10
 -11  -2  -3    1.00    1.70
  11   2   3    2.20    1.20
 -10  -2  -4    1.10    1.60
  10   2   4    1.20    0.90
  -9  -2  -5   18.40    3.40
   9   2   5   26.40    2.50
  -8  -2  -6    0.40    1.80
   8   2   6    3.20    1.00
  -7  -2  -7   34.90    5.20
   7   2   7   34.60    3.40
  -6  -2  -8    3.80    2.60
   6   2   8    2.60    0.80
  -5  -2  -9   27.20    4.00
   5   2   9   27.80    2.60
  -4  -2 -10    2.10    1.30
   4   2  10    2.10    0.70
  -3  -2 -11    8.70    1.60
   3   2  11   11.60    1.50
  -2  -2 -12  115.69    9.20
   2   2  12  111.09    9.00
  -1  -2 -13  197.18   15.40
   1   2  13  196.18   15.20
   0  -2 -14   58.09    5.10
   0   2  14   57.29    4.80
   1  -2 -15   31.30    3.50
  -1   2  15   37.60    3.20
   2  -2 -16   67.89    6.00
  -2   2  16   66.69    5.50
  -3   2  17    0.40    0.50
  -3   2  17    0.00    0.70
  -4   2  18    3.90    1.30
  -4   2  18    3.60    0.80
  -5   2  19   -0.40    0.90
  -5   2  19    0.00    0.40
  -6   2  20    3.30    2.20
  -6   2  20    7.30    1.10
  -6   2  20    5.50    1.70
  -7   2  21    2.00    2.00
  -7   2  21    2.50    1.40
  -8   2  22    3.40    1.60
  -8   2  22    5.80    2.80
  -9   2  23    2.10    1.50
  -9   2  23    1.40    2.30
 -10   2  24    2.00    1.60
 -10   2  24    0.40    2.20
 -11   2  25    1.80    1.70
 -12   2  26   -0.50    1.50
 -18  -1   3    1.70    2.50
 -17  -1   2    3.70    2.70
 -16  -1   1   -0.90    2.00
 -15  -1   0    2.00    2.10
 -14  -1  -1    1.40    2.10
 -13  -1  -2    2.50    2.00
  13   1   2    6.20    1.50
 -12  -1  -3    4.40    2.00
  12   1   3    7.20    1.40
 -11  -1  -4   17.00    3.10
  11   1   4   11.70    1.80
 -10  -1  -5    8.80    2.30
  10   1   5    6.40    1.30
  -9  -1  -6    8.80    2.40
   9   1   6   12.50    1.60
  -8  -1  -7   12.40    2.80
   8   1   7   16.10    1.90
  -7  -1  -8    5.00    3.30
   7   1   8    1.60    1.10
  -6  -1  -9    5.00    2.40
   6   1   9    4.20    1.00
  -5  -1 -10   34.50    4.10
   5   1  10   27.20    2.70
  -4  -1 -11    4.70    1.20
   4   1  11    3.60    0.80
  -3  -1 -12    5.30    1.10
   3   1  12    8.40    1.20
  -2  -1 -13   70.99    5.90
   2   1  13   69.89    5.80
  -1  -1 -14   91.29    7.60
   1   1  14   96.09    7.50
   0  -1 -15   18.90    2.30
   0   1  15   15.10    1.90
   1  -1 -16  184.08   14.60
  -1   1  16  182.88   14.30
  -2   1  17   21.90    2.90
  -2   1  17   22.40    2.20
  -3   1  18   22.90    3.00
  -3   1  18   18.40    2.20
  -4   1  19    3.60    0.90
  -4   1  19    0.80    0.90
  -5   1  20    3.90    0.90
  -5   1  20    0.10    0.90
  -6   1  21    0.80    1.20
  -6   1  21    2.10    0.80
  -7   1  22    8.80    2.20
  -8   1  23    3.30    1.60
  -8   1  23    3.70    2.50
  -9   1  24   12.50    3.90
  -9   1  24   12.90    2.80
 -10   1  25   -0.70    1.10
 -10   1  25    2.60    2.90
 -11   1  26    5.20    3.20
 -11   1  26    7.00    2.40
 -12   1  27    2.70    1.80
 -18   0   2    3.30    2.70
 -17   0   1    9.80    3.40
 -16   0   0    7.10    2.60
 -15   0  -1    3.00    2.20
 -14   0  -2   -0.30    1.90
 -13   0  -3    1.40    1.60
  13   0   3    0.00    1.00
 -12   0  -4    3.60    1.80
  12   0   4    3.20    1.10
 -11   0  -5    0.10    1.40
  11   0   5    3.90    1.10
 -10   0  -6   -0.60    1.20
  10   0   6    1.00    0.80
  -9   0  -7   16.50    2.80
   9   0   7   14.50    1.90
  -8   0  -8   32.20    4.00
   8   0   8   20.20    2.50
  -7   0  -9   11.20    3.20
   7   0   9   19.80    2.20
  -6   0 -10   10.20    2.60
   6   0  10    6.40    1.20
  -5   0 -11   17.90    2.40
   5   0  11   14.50    1.80
  -4   0 -12    2.60    0.90
   4   0  12    1.00    0.70
  -3   0 -13  126.49    9.50
   3   0  13  113.09    9.50
  -2   0 -14   57.89    4.80
   2   0  14   56.89    4.80
  -1   0 -15   14.90    1.70
   1   0  15   11.70    1.60
   0   0 -16  110.29    9.10
   0   0  16  111.29    8.90
  -1   0  17   18.10    2.10
  -1   0  17   18.10    2.40
  -2   0  18    1.10    0.70
  -2   0  18    0.80    0.80
  -3   0  19    0.00    0.70
  -3   0  19    0.70    0.60
  -4   0  20   -0.10    0.60
  -4   0  20   -0.30    0.70
  -5   0  21   11.40    1.70
  -5   0  21   12.10    2.30
  -6   0  22    0.30    0.80
  -6   0  22    0.30    1.00
  -7   0  23   33.70    4.50
  -8   0  24    1.60    1.40
  -9   0  25    1.10    1.40
  -9   0  25   -0.50    2.20
 -10   0  26    2.70    1.80
 -10   0  26    1.20    2.60
 -11   0  27    0.20    2.70
 -11   0  27    1.60    1.70
 -12   0  28    4.80    3.70
 -12   0  28    0.10    1.80
 -18   1   1    2.20    2.50
 -17   1   0   -1.10    1.80
 -16   1  -1   -1.90    1.70
 -15   1  -2    2.80    2.10
 -14   1  -3   -0.60    1.90
 -13   1  -4    5.30    2.10
  13  -1   4    5.40    1.30
 -12   1  -5    2.50    1.60
  12  -1   5    1.90    1.00
 -11   1  -6    0.70    1.50
  11  -1   6    0.50    1.00
 -10   1  -7    7.20    2.00
  10  -1   7   10.10    1.50
  -9   1  -8    2.40    1.50
   9  -1   8    0.50    0.70
  -8   1  -9    6.80    2.10
   8  -1   9    7.70    1.30
  -7   1 -10    4.60    2.30
   7  -1  10    6.60    1.20
  -6   1 -11    3.20    2.80
   6  -1  11    3.00    1.20
  -5   1 -12   11.80    1.80
   5  -1  12   20.10    2.10
  -4   1 -13    0.90    0.60
   4  -1  13    2.50    0.80
  -3   1 -14    4.80    0.80
   3  -1  14    4.40    0.90
  -2   1 -15    2.40    0.80
   2  -1  15    3.90    0.90
   1  -1  16  170.58   13.40
   0  -1  17   15.90    2.10
   0  -1  17   18.50    2.10
  -1  -1  18    2.10    0.80
  -1  -1  18    2.60    0.90
  -2  -1  19   12.60    2.00
  -2  -1  19   12.80    1.80
  -3  -1  20    2.20    0.80
  -3  -1  20    1.10    0.80
  -4  -1  21    1.00    0.70
  -4  -1  21    0.80    0.90
  -5  -1  22    1.60    1.10
  -5  -1  22   -0.10    0.70
  -6  -1  23    1.70    1.30
  -6  -1  23    1.40    0.90
  -7  -1  24    1.20    1.00
  -7  -1  24    3.60    1.60
  -8  -1  25    7.10    2.10
  -9  -1  26    4.40    2.00
 -10  -1  27   -1.60    1.20
 -11  -1  28    2.10    1.70
 -11  -1  28   -0.60    2.90
 -18   2   0    0.30    2.50
 -17   2  -1    0.10    1.90
 -16   2  -2    6.80    2.60
 -15   2  -3    3.30    2.00
 -14   2  -4    6.10    2.50
 -13   2  -5    1.60    1.50
  13  -2   5    2.10    1.30
 -12   2  -6   -0.40    1.30
  12  -2   6   -1.00    0.80
 -11   2  -7    3.30    1.60
  11  -2   7    1.90    1.00
 -10   2  -8    2.50    1.50
  10  -2   8    2.30    0.90
  -9   2  -9    0.00    1.20
   9  -2   9   -0.40    0.70
  -8   2 -10    3.90    1.70
   8  -2  10    3.90    1.00
  -7   2 -11   43.40    4.70
   7  -2  11   42.30    3.90
  -6   2 -12   -1.40    1.10
   6  -2  12    1.50    0.80
  -5   2 -13   58.59    4.60
   5  -2  13   52.99    4.90
  -4   2 -14  109.89    8.70
   4  -2  14  115.99    9.10
  -3   2 -15   21.30    2.00
   2  -2  16   62.79    5.40
   2  -2  16   62.89    5.20
   1  -2  17   36.00    3.40
   1  -2  17   35.70    3.30
   0  -2  18    1.20    0.70
   0  -2  18   -0.40    0.60
  -1  -2  19    0.60    0.70
  -1  -2  19    0.10    0.60
  -2  -2  20    0.30    0.70
  -2  -2  20    1.10    0.80
  -3  -2  21    0.20    0.70
  -3  -2  21    0.30    0.60
  -4  -2  22    8.70    1.60
  -4  -2  22    8.50    1.90
  -5  -2  23    6.70    1.80
  -5  -2  23    8.10    1.60
  -6  -2  24   35.90    3.50
  -6  -2  24   33.90    4.50
  -7  -2  25   -0.10    1.20
  -7  -2  25    6.10    1.40
  -8  -2  26   17.90    3.30
  -9  -2  27    2.20    1.80
 -10  -2  28    1.30    1.60
 -11  -2  29   -0.30    1.50
 -14   3  -5    8.80    2.40
 -13   3  -6    0.10    1.30
 -12   3  -7   -0.10    1.20
  12  -3   7    0.00    0.90
 -11   3  -8    0.80    1.20
  11  -3   8    0.00    0.70
 -10   3  -9    2.60    1.40
  10  -3   9    0.10    0.80
  -9   3 -10    2.20    1.30
   9  -3  10   -0.50    0.70
  -8   3 -11    1.20    1.50
   8  -3  11    1.90    0.90
  -7   3 -12   -1.90    1.50
   7  -3  12   -0.70    0.50
  -6   3 -13    0.00    0.40
   6  -3  13    0.50    0.70
   5  -3  14   18.60    2.30
   4  -3  15    1.50    0.80
   3  -3  16    3.50    1.00
   3  -3  16    6.00    0.80
   2  -3  17    2.00    0.60
   2  -3  17    3.90    1.10
   1  -3  18   -0.30    0.50
   1  -3  18    2.00    0.90
   0  -3  19    0.10    0.50
   0  -3  19   -0.20    0.70
  -1  -3  20    0.70    0.80
  -1  -3  20    0.80    0.80
  -2  -3  21    0.80    0.80
  -2  -3  21    1.30    0.80
  -3  -3  22    2.40    1.00
  -3  -3  22    0.00    0.80
  -4  -3  23   10.70    2.10
  -4  -3  23    6.40    1.50
  -5  -3  24    6.90    1.60
  -5  -3  24    9.60    2.10
  -6  -3  25    2.50    1.30
  -6  -3  25    4.90    1.70
  -7  -3  26   -0.50    3.10
  -7  -3  26   -1.10    1.00
  -7  -3  26    0.10    1.00
  -8  -3  27    4.80    1.90
  -9  -3  28   -0.30    1.20
 -10  -3  29    0.90    1.60
  12  -4   8    2.50    1.20
  11  -4   9   -0.20    0.80
  10  -4  10    3.20    1.10
   9  -4  11    1.80    0.90
   8  -4  12   21.80    2.60
   7  -4  13   15.50    2.10
   6  -4  14    0.80    0.80
   5  -4  15   46.20    4.20
   4  -4  16   22.30    2.70
   3  -4  17   12.50    1.90
   2  -4  18    1.70    0.90
   2  -4  18    3.50    0.70
   1  -4  19   -0.30    0.40
   1  -4  19   -0.90    0.60
   0  -4  20    0.50    0.60
   0  -4  20    0.20    0.80
  -1  -4  21    1.20    1.00
  -1  -4  21    2.20    1.00
  -2  -4  22   23.80    2.80
  -2  -4  22   17.40    2.60
  -3  -4  23   25.70    3.10
  -3  -4  23   24.10    3.30
  -4  -4  24    2.10    1.30
  -4  -4  24    6.50    1.60
  -5  -4  25    9.40    1.90
  -5  -4  25    8.30    2.10
  -6  -4  26    5.50    1.60
  -6  -4  26    4.50    3.60
  -6  -4  26    7.00    2.10
  -7  -4  27    1.50    1.50
  -7  -4  27   10.60    1.90
  -7  -4  27    3.00    3.60
  -8  -4  28   -1.90    1.00
  -9  -4  29    0.10    1.50
 -10  -4  30    0.80    1.50
  12  -5   9    1.10    1.10
  11  -5  10    1.30    0.90
  10  -5  11    0.10    0.80
   9  -5  12    4.00    1.20
   8  -5  13   10.00    1.70
   7  -5  14   11.00    1.80
   6  -5  15   26.80    3.10
   5  -5  16   50.69    4.60
   4  -5  17    6.50    1.50
   3  -5  18    5.60    1.30
   2  -5  19   12.10    1.90
   1  -5  20    0.60    0.80
   0  -5  21    9.90    1.80
   0  -5  21    8.90    1.80
  -1  -5  22   21.20    2.60
  -1  -5  22   27.50    3.10
  -2  -5  23   18.40    2.60
  -2  -5  23   14.20    2.40
  -3  -5  24   12.10    2.30
  -3  -5  24   16.10    2.40
  -4  -5  25    4.90    1.60
  -4  -5  25    3.80    1.60
  -5  -5  26    2.80    1.50
  -5  -5  26    4.70    1.50
  -6  -5  27   30.70    3.50
  -6  -5  27   22.60    3.70
  -6  -5  27   21.20    6.40
  -7  -5  28   -2.90    3.00
  -7  -5  28   -0.60    1.20
  -7  -5  28   -2.10    0.90
  -8  -5  29   -0.60    3.50
  -8  -5  29    0.30    1.50
  -9  -5  30    0.70    1.70
  11  -6  11    8.80    1.80
  10  -6  12    2.90    1.20
   9  -6  13    0.70    0.90
   8  -6  14    1.50    1.00
   7  -6  15   13.90    2.10
   6  -6  16   11.60    2.00
   5  -6  17   -0.20    0.90
   4  -6  18    0.90    1.00
   3  -6  19    0.30    0.80
   2  -6  20    3.70    1.30
   1  -6  21    1.50    1.00
   0  -6  22    0.30    1.00
  -1  -6  23    3.80    1.40
  -2  -6  24    0.50    1.20
  -3  -6  25    9.30    2.10
  -4  -6  26    2.30    1.30
  -5  -6  27    1.50    1.40
  -5  -6  27    0.60    3.20
  -6  -6  28    6.80    4.60
  -6  -6  28    8.10    2.00
  -7  -6  29    3.00    4.30
  -7  -6  29    2.70    1.50
  -8  -6  30   -0.40    1.70
  11  -7  12    4.60    1.50
  10  -7  13   -0.30    0.80
   9  -7  14   21.20    2.70
   8  -7  15   20.70    2.70
   7  -7  16   29.60    3.40
   6  -7  17    0.00    0.90
   5  -7  18   15.40    2.30
   4  -7  19   13.60    2.20
   3  -7  20   17.50    2.50
   2  -7  21    2.00    1.30
   1  -7  22   31.90    3.80
   0  -7  23   33.90    4.00
  -1  -7  24   11.60    2.30
  -2  -7  25   -0.10    1.20
  -3  -7  26   35.70    4.30
  -4  -7  27    2.90    1.60
  -4  -7  27    0.00    3.20
  -5  -7  28    3.90    1.60
  -5  -7  28   -2.70    3.00
  -6  -7  29    3.20    1.60
  -6  -7  29    2.90    4.00
  -7  -7  30    1.00    1.50
  -7  -7  30   -0.50    3.30
  11  -8  13    1.60    1.20
  10  -8  14   -1.40    0.90
   9  -8  15    3.40    1.50
   8  -8  16   -1.20    1.00
   7  -8  17    5.10    1.50
   6  -8  18    2.70    1.30
   5  -8  19   13.60    2.30
   4  -8  20    5.50    1.70
   3  -8  21    6.10    1.60
   2  -8  22   42.60    4.40
   1  -8  23    6.00    1.70
   0  -8  24    0.00    1.20
  -1  -8  25    1.20    1.40
  -2  -8  26    5.10    1.70
  -3  -8  27    5.20    1.70
  -3  -8  27   -0.20    3.30
  -4  -8  28    3.10    4.00
  -4  -8  28    0.70    1.30
  -5  -8  29    1.20    1.50
  -5  -8  29    1.20    3.20
  -6  -8  30    2.90    4.00
  -6  -8  30    7.20    2.00
  11  -9  14    0.10    1.10
  10  -9  15    4.50    1.50
   9  -9  16    0.30    1.00
   8  -9  17    6.80    1.70
   7  -9  18    0.10    1.20
   6  -9  19    4.40    1.70
   5  -9  20   -1.50    1.10
   4  -9  21   23.30    3.30
   3  -9  22    1.00    1.30
   2  -9  23    6.00    1.80
   1  -9  24    4.20    1.70
   0  -9  25    4.50    1.70
  -1  -9  26    3.10    1.70
  -2  -9  27    1.20    1.40
  -2  -9  27   -0.70    2.80
  -3  -9  28    4.00    1.80
  -3  -9  28    7.90    5.40
  -4  -9  29   -1.80    3.30
  -5  -9  30    0.50    1.50
  -5  -9  30    4.90    4.40
  10 -10  16   -0.20    1.20
   9 -10  17    1.40    1.30
   8 -10  18    2.10    1.40
   7 -10  19    0.80    1.10
   6 -10  20   -1.60    1.00
   5 -10  21    3.90    1.60
   4 -10  22   10.30    2.20
   3 -10  23    0.80    1.40
   2 -10  24   -0.70    1.40
   1 -10  25   -0.50    1.30
   0 -10  26    4.30    1.80
  -1 -10  27   10.40    5.70
  -1 -10  27   16.20    2.90
  -2 -10  28    5.30    1.90
  -2 -10  28   -0.50    3.40
  -3 -10  29   -2.90    2.70
  -3 -10  29    4.20    1.80
  -4 -10  30    0.20    1.50
  -4 -10  30    4.10    5.20
  10 -11  17   -1.20    1.20
   9 -11  18    0.20    1.20
   8 -11  19    0.90    1.30
   7 -11  20    0.50    1.40
   6 -11  21    1.60    1.40
   5 -11  22    4.50    1.90
   4 -11  23   -0.40    1.30
   3 -11  24    1.10    1.40
   2 -11  25    3.80    1.70
   1 -11  26    0.70    1.70
   0 -11  27    0.30    3.50
   0 -11  27   -2.20    1.20
  -1 -11  28   -1.30    3.60
  -1 -11  28    1.50    1.60
  -2 -11  29   -0.90    3.50
  -2 -11  29   -0.10    1.60
  10 -12  18    1.80    1.60
   9 -12  19    0.70    1.40
   8 -12  20   -0.30    1.40
   7 -12  21    0.40    1.30
   6 -12  22    0.90    1.40
   5 -12  23    0.80    1.40
   4 -12  24    2.30    1.60
   3 -12  25    3.50    1.70
   2 -12  26   -1.10    3.40
   2 -12  26   -0.90    1.50
   1 -12  27   -1.90    3.30
   1 -12  27    0.90    1.80
   0 -12  28    6.00    2.20
   0 -12  28    2.50    4.00
   8 -13  21    5.30    1.90
   7 -13  22    3.30    1.90
   6 -13  23    2.60    1.80
   5 -13  24    3.20    5.10
   5 -13  24    0.30    1.60
   4 -13  25   -1.00    1.50
   4 -13  25   -0.60    4.60
   3 -13  26    2.50    4.80
  -4 -18   4    2.80    4.10
  -3 -18   3    9.10    4.70
   3  18  -3    2.50    2.40
  -2 -18   2    9.40    4.50
   2  18  -2    2.00    2.50
  -1 -18   1    5.60    4.00
   1  18  -1   -0.60    2.00
   0 -18   0    6.60    3.60
   0  18   0    2.70    2.10
   1 -18  -1   -4.00    3.00
  -1  18   1    3.80    2.10
  -6 -17   5   -2.90    4.90
   6  17  -5   -2.40    2.10
  -5 -17   4    6.10    4.30
   5  17  -4   -1.30    1.80
  -4 -17   3    7.20    4.00
   4  17  -3   -0.70    1.80
  -3 -17   2    0.80    3.10
   3  17  -2    1.80    1.70
  -2 -17   1    1.10    3.00
   2  17  -1    0.40    1.70
  -1 -17   0    1.10    2.70
   1  17   0    2.80    1.90
   0 -17  -1   12.70    3.70
   0  17   1   13.10    2.60
   1 -17  -2    5.50    2.90
  -1  17   2    5.60    2.00
   2 -17  -3    5.20    2.70
   3 -17  -4    0.60    2.30
   4 -17  -5    0.90    2.10
   5 -17  -6   -0.40    2.80
   6 -17  -7    2.80    2.70
  -8 -16   6    3.40    5.90
   8  16  -6   -5.60    2.30
  -7 -16   5    6.10    5.70
   7  16  -5   -2.20    1.70
  -6 -16   4    9.00    4.90
   6  16  -4    3.10    2.10
  -5 -16   3    6.40    4.60
   5  16  -3    1.70    2.00
  -4 -16   2    2.10    3.90
   4  16  -2   -0.30    1.80
  -3 -16   1   -1.60    3.80
   3  16  -1    1.60    2.00
  -2 -16   0    1.30    3.20
   2  16   0    0.30    1.70
  -1 -16  -1    1.50    2.90
   1  16   1   -0.50    1.40
   0 -16  -2    7.00    3.20
   0  16   2    4.00    1.90
   1 -16  -3    3.70    2.90
  -1  16   3    2.00    1.60
   2 -16  -4   -0.60    2.50
  -2  16   4    1.30    1.50
   3 -16  -5    0.30    2.20
   4 -16  -6    0.30    2.00
   5 -16  -7    2.10    2.50
   6 -16  -8   -0.20    2.20
   7 -16  -9    2.20    2.90
 -10 -15   7    4.30    5.70
  10  15  -7   -0.70    2.30
  -9 -15   6    1.70    5.40
   9  15  -6   -0.20    2.10
  -8 -15   5    2.50    5.10
   8  15  -5    0.40    1.90
  -7 -15   4   -2.40    4.70
   7  15  -4    0.40    1.80
  -6 -15   3    1.30    5.00
   6  15  -3   -1.90    1.70
  -5 -15   2   -1.40    3.70
   5  15  -2    0.70    1.70
  -4 -15   1    8.30    3.70
   4  15  -1    3.60    1.80
  -3 -15   0    4.50    3.20
   3  15   0    0.20    1.40
  -2 -15  -1   19.00    4.50
   2  15   1   22.40    3.30
  -1 -15  -2    7.70    3.20
   1  15   2    2.60    1.60
   0 -15  -3    2.10    2.60
   0  15   3    2.60    1.60
   1 -15  -4   -2.90    1.80
  -1  15   4    0.70    1.30
   2 -15  -5    0.10    1.90
  -2  15   5   -0.20    1.10
   3 -15  -6    0.00    1.90
   4 -15  -7   -0.40    1.90
   5 -15  -8   -2.60    1.90
   6 -15  -9   -0.50    2.20
   7 -15 -10    1.00    2.20
   8 -15 -11    4.80    3.10
   9 -15 -12   -1.80    2.30
 -11 -14   7    1.80    5.10
  11  14  -7   -1.20    2.60
 -10 -14   6    1.20    4.70
  10  14  -6   -1.80    1.90
  -9 -14   5   -0.60    4.00
   9  14  -5   -0.90    1.70
  -8 -14   4   -5.50    5.20
   8  14  -4    2.80    2.10
  -7 -14   3    7.90    5.50
   7  14  -3    5.70    2.10
  -6 -14   2    2.80    4.00
   6  14  -2   -0.90    1.40
  -5 -14   1    3.50    4.30
   5  14  -1    1.70    1.70
  -4 -14   0   33.10    6.00
   4  14   0   16.80    2.90
  -3 -14  -1   11.20    4.50
   3  14   1   11.40    2.50
  -2 -14  -2   15.10    5.10
   2  14   2    5.20    2.10
  -1 -14  -3    5.10    4.00
   1  14   3    0.80    1.80
   0 -14  -4    6.10    3.90
   0  14   4    3.30    1.80
   1 -14  -5    0.30    2.50
  -1  14   5    0.60    1.40
   2 -14  -6    0.80    2.10
  -2  14   6    0.00    1.10
   3 -14  -7    1.50    2.10
   4 -14  -8   -0.30    1.80
   5 -14  -9   -0.40    1.80
   6 -14 -10    1.60    2.50
   7 -14 -11   -0.40    2.00
   8 -14 -12    0.40    2.20
   9 -14 -13   -1.20    2.60
 -10  14  14    1.40    1.90
 -12 -13   7    0.60    4.50
  12  13  -7   -2.80    2.40
 -11 -13   6   -5.80    3.50
  11  13  -6   -3.20    1.60
 -10 -13   5   -0.70    4.70
  10  13  -5    1.40    2.00
  -9 -13   4   -0.70    4.20
   9  13  -4   -1.60    1.50
  -8 -13   3    5.60    4.80
   8  13  -3    3.10    2.00
  -7 -13   2    4.70    4.80
   7  13  -2    0.90    1.60
  -6 -13   1    9.30    5.40
   6  13  -1    1.70    1.60
  -5 -13   0    2.60    4.30
   5  13   0    1.00    1.80
  -4 -13  -1   -2.80    2.70
   4  13   1    3.50    1.60
  -3 -13  -2    1.10    2.70
   3  13   2    0.90    1.20
  -2 -13  -3   11.40    3.30
   2  13   3    5.20    1.50
  -1 -13  -4    4.70    2.50
   1  13   4    5.40    1.60
   0 -13  -5   17.10    3.50
   0  13   5   12.00    2.20
   1 -13  -6    0.00    1.70
  -1  13   6   -0.20    1.00
   2 -13  -7   -0.90    1.70
  -2  13   7    2.90    1.20
   3 -13  -8    1.00    3.10
  -3  13   8    1.50    1.10
   4 -13  -9   -2.00    1.70
   5 -13 -10    0.30    1.90
   6 -13 -11   -0.70    1.90
   7 -13 -12   -4.50    1.70
   8 -13 -13   16.80    3.90
   9 -13 -14   -1.00    2.30
 -10  13  15   -2.70    1.50
 -13 -12   7    1.20    4.20
  13  12  -7   -4.50    2.30
 -12 -12   6   -4.90    3.60
  12  12  -6   -1.60    1.80
 -11 -12   5    2.70    4.70
  11  12  -5   -1.70    1.90
 -10 -12   4   -0.50    3.40
  10  12  -4    1.00    1.70
  -9 -12   3    4.90    4.80
   9  12  -3   16.40    2.90
  -8 -12   2   33.20    7.60
   8  12  -2   48.60    4.90
  -7 -12   1   16.60    6.10
   7  12  -1   22.60    3.40
  -6 -12   0  129.29   12.80
   6  12   0  114.39   10.00
  -5 -12  -1   13.50    4.50
   5  12   1   10.20    2.00
  -4 -12  -2   14.60    4.10
   4  12   2    8.90    1.90
  -3 -12  -3    3.80    2.40
   3  12   3    0.70    1.00
  -2 -12  -4    7.70    3.00
   2  12   4    1.50    1.10
  -1 -12  -5    2.60    2.10
   1  12   5    3.70    1.20
   0 -12  -6    0.80    1.80
   0  12   6    0.50    1.00
   1 -12  -7    8.00    2.30
  -1  12   7    4.20    1.40
   2 -12  -8   -0.90    1.40
  -2  12   8    0.90    0.90
   3 -12  -9    1.60    1.80
  -3  12   9    2.30    1.10
   4 -12 -10    3.20    2.00
   5 -12 -11    0.90    2.70
   6 -12 -12    1.40    2.00
   7 -12 -13   14.70    3.60
   8 -12 -14   14.40    3.80
 -10  12  16    0.10    1.80
 -11  12  17    0.60    2.00
 -14 -11   7    1.10    3.60
  14  11  -7   -1.50    2.40
 -13 -11   6    3.10    4.00
  13  11  -6    4.30    2.10
 -12 -11   5    4.40    4.20
  12  11  -5    4.80    2.20
 -11 -11   4    4.40    3.50
  11  11  -4    2.80    1.80
 -10 -11   3    8.10    4.30
  10  11  -3    5.30    2.00
  -9 -11   2   -1.30    4.30
   9  11  -2   -0.90    1.80
  -8 -11   1   19.80    5.30
   8  11  -1   24.30    3.10
  -7 -11   0    0.10    3.70
   7  11   0   -1.20    1.00
  -6 -11  -1    0.20    3.60
   6  11   1    1.60    1.00
  -5 -11  -2    5.50    3.30
   5  11   2    1.90    1.00
  -4 -11  -3    4.30    3.30
   4  11   3    3.30    1.20
  -3 -11  -4    2.60    2.80
   3  11   4    0.50    1.20
  -2 -11  -5    4.30    2.80
   2  11   5    5.30    1.40
  -1 -11  -6   -1.30    2.00
   1  11   6    0.80    1.00
   0 -11  -7    2.90    2.30
   0  11   7    5.40    1.40
   1 -11  -8   -1.30    1.30
  -1  11   8    1.00    1.00
   2 -11  -9    2.20    1.60
  -2  11   9    0.40    0.80
   3 -11 -10    2.50    1.80
  -3  11  10    4.20    1.10
   4 -11 -11    2.30    1.80
   5 -11 -12    7.30    2.60
   6 -11 -13    4.80    3.20
   7 -11 -14    1.00    2.20
   8 -11 -15    0.60    1.90
  -9  11  16   -0.50    1.70
 -10  11  17    2.10    1.90
 -11  11  18   -0.40    1.60
 -15 -10   7    1.00    4.10
 -15 -10   7    1.20    4.00
  15  10  -7   -0.20    2.30
 -14 -10   6    0.20    3.30
 -14 -10   6    0.40    3.60
  14  10  -6    0.40    1.70
 -13 -10   5    0.40    3.30
  13  10  -5    0.50    1.80
 -12 -10   4   -3.30    2.90
  12  10  -4    0.50    1.60
 -11 -10   3   -2.10    3.00
  11  10  -3    0.10    1.40
 -10 -10   2   -0.80    4.00
  10  10  -2   -0.40    1.80
  -9 -10   1   21.50    5.30
   9  10  -1   20.00    2.80
  -8 -10   0   -1.40    3.30
   8  10   0    1.80    1.20
  -7 -10  -1    4.50    3.60
   7  10   1    7.30    1.50
  -6 -10  -2   13.60    4.70
   6  10   2   13.00    2.20
  -5 -10  -3   -1.00    2.70
   5  10   3    1.60    1.00
  -4 -10  -4   20.10    4.30
   4  10   4   13.60    2.00
  -3 -10  -5    4.80    2.40
   3  10   5   -0.30    0.90
  -2 -10  -6    7.70    2.50
   2  10   6    4.50    1.30
  -1 -10  -7    8.20    2.20
   1  10   7    9.00    1.60
   0 -10  -8    1.20    1.40
   0  10   8    2.00    0.90
   1 -10  -9   29.10    4.10
  -1  10   9   29.60    3.00
   2 -10 -10   47.10    5.40
  -2  10  10   53.19    4.50
   3 -10 -11    9.80    2.50
  -3  10  11   13.00    1.80
   4 -10 -12   31.40    4.50
   5 -10 -13   10.30    2.50
   6 -10 -14   12.20    3.10
   7 -10 -15   -2.70    1.80
  -9  10  17   -0.90    1.50
 -10  10  18    1.30    1.60
 -11  10  19    2.20    2.10
 -12  10  20    0.90    2.00
 -16  -9   7   -1.00    3.90
 -15  -9   6   -2.10    2.60
 -15  -9   6   -0.20    3.40
  15   9  -6    0.40    1.80
 -14  -9   5   -0.50    3.50
 -14  -9   5    0.10    3.10
  14   9  -5    1.30    1.80
 -13  -9   4   -0.90    3.10
 -13  -9   4   -1.30    2.30
  13   9  -4    1.40    1.60
 -12  -9   3    0.00    2.50
  12   9  -3    2.20    1.50
 -11  -9   2   13.20    5.00
  11   9  -2   15.90    2.70
 -10  -9   1    8.00    3.40
  10   9  -1    7.10    1.80
  -9  -9   0   -0.60    2.70
   9   9   0   -0.20    1.00
  -8  -9  -1    5.80    3.50
   8   9   1    6.10    1.50
  -7  -9  -2    1.60    3.50
   7   9   2   -0.50    1.00
  -6  -9  -3   -1.90    2.70
   6   9   3    2.70    1.10
  -5  -9  -4   12.30    3.80
   5   9   4   11.30    1.80
  -4  -9  -5    5.90    2.70
   4   9   5    3.40    1.10
  -3  -9  -6   19.90    3.50
   3   9   6   15.10    2.10
  -2  -9  -7    5.70    2.20
   2   9   7    6.80    1.30
  -1  -9  -8    1.10    1.50
   1   9   8   -0.10    0.70
   0  -9  -9   11.70    2.40
   0   9   9   14.60    2.00
   1  -9 -10   25.60    3.60
  -1   9  10   25.20    2.70
   2  -9 -11   44.70    4.90
  -2   9  11   48.00    4.20
   3  -9 -12    8.30    2.30
  -3   9  12    8.10    1.30
   4  -9 -13   12.20    2.70
  -4   9  13    9.40    1.40
   5  -9 -14    8.10    2.30
   6  -9 -15   -0.30    1.60
   7  -9 -16    0.80    2.70
  -8   9  17    8.20    2.50
  -9   9  18   -0.50    1.60
 -10   9  19   -0.80    1.60
 -11   9  20   -2.20    1.60
 -12   9  21   -0.60    1.70
 -16  -8   6   -0.90    3.20
 -15  -8   5    2.60    4.10
 -15  -8   5   -0.50    2.80
  15   8  -5    2.40    1.90
 -14  -8   4    4.00    3.40
 -14  -8   4    2.90    3.80
  14   8  -4    1.30    2.10
 -13  -8   3    8.70    4.30
 -13  -8   3    4.10    3.60
  13   8  -3    5.70    2.00
 -12  -8   2   11.70    4.20
 -12  -8   2   10.00    4.10
  12   8  -2    9.40    2.20
 -11  -8   1    0.30    2.70
 -11  -8   1   -2.00    2.00
  11   8  -1    0.60    1.30
 -10  -8   0    6.90    3.50
  10   8   0    4.90    1.40
  -9  -8  -1    1.10    2.80
   9   8   1    4.10    1.40
  -8  -8  -2   10.20    3.70
   8   8   2   14.70    2.10
  -7  -8  -3   -1.00    2.50
   7   8   3    1.40    0.90
  -6  -8  -4   11.60    4.00
   6   8   4   12.80    1.80
  -5  -8  -5    5.00    2.90
   5   8   5    8.50    1.60
  -4  -8  -6   -0.60    2.10
   4   8   6    0.50    0.80
  -3  -8  -7   26.40    4.20
   3   8   7   27.30    2.80
  -2  -8  -8   32.00    4.20
   2   8   8   28.70    2.90
  -1  -8  -9    6.90    1.90
   1   8   9    7.30    1.40
   0  -8 -10    2.20    1.40
   0   8  10    0.70    0.80
   1  -8 -11  121.19   10.60
  -1   8  11  127.29    9.90
   2  -8 -12   59.99    6.10
  -2   8  12   66.69    5.40
   3  -8 -13    2.10    1.30
  -3   8  13    1.70    0.70
   4  -8 -14   -0.60    1.50
  -4   8  14   -0.50    0.50
   5  -8 -15    1.50    1.70
   6  -8 -16   -0.30    1.50
  -8   8  18    1.60    1.80
  -9   8  19   -1.90    1.30
 -10   8  20   -1.20    1.60
 -11   8  21   -0.50    1.70
 -12   8  22   -2.10    1.70
 -16  -7   5    0.40    2.90
 -15  -7   4   -2.30    2.20
  15   7  -4   -3.30    1.50
 -14  -7   3    4.30    2.90
  14   7  -3   -0.20    1.60
 -13  -7   2    9.30    4.40
 -13  -7   2   12.50    3.80
  13   7  -2   18.70    2.70
 -12  -7   1    1.90    2.90
 -12  -7   1    2.00    2.30
  12   7  -1    6.00    2.10
 -11  -7   0   -0.30    2.50
 -11  -7   0   -0.20    2.20
  11   7   0    1.40    1.30
 -10  -7  -1   -2.00    2.10
 -10  -7  -1    1.40    2.10
  10   7   1   -0.30    0.90
  -9  -7  -2    2.40    2.80
  -9  -7  -2    6.90    2.90
   9   7   2    7.10    1.70
  -8  -7  -3    2.10    2.80
   8   7   3    5.80    1.40
  -7  -7  -4    0.10    2.60
   7   7   4    0.20    0.80
  -6  -7  -5   -0.30    2.50
   6   7   5   -0.30    0.70
  -5  -7  -6   39.40    5.90
   5   7   6   28.90    3.00
  -4  -7  -7   39.70    5.40
   4   7   7   36.60    3.50
  -3  -7  -8   22.60    3.50
   3   7   8   14.30    2.00
  -2  -7  -9  110.09    9.60
   2   7   9  108.89    8.90
  -1  -7 -10    5.10    1.80
   1   7  10    9.80    1.50
   0  -7 -11   88.89    7.90
   0   7  11   88.69    7.30
   1  -7 -12   10.70    2.20
  -1   7  12   10.50    1.50
   2  -7 -13   17.60    2.90
  -2   7  13   27.50    2.40
   3  -7 -14    3.00    1.50
  -3   7  14    0.90    0.60
   4  -7 -15   -0.70    1.10
  -4   7  15    1.10    0.60
   5  -7 -16   23.90    3.60
   6  -7 -17    0.80    1.50
  -7   7  18    2.10    1.60
  -8   7  19    3.40    2.00
  -9   7  20    2.70    1.90
 -10   7  21    2.00    1.90
 -11   7  22    0.30    1.80
 -12   7  23    0.20    1.60
 -17  -6   5   -2.50    2.80
 -16  -6   4    1.00    2.80
 -15  -6   3    6.80    3.40
  15   6  -3    6.30    2.40
 -14  -6   2    7.30    3.20
  14   6  -2   10.70    2.20
 -13  -6   1    7.40    3.80
  13   6  -1    5.60    2.00
 -12  -6   0    9.00    3.50
  12   6   0    5.70    1.70
 -11  -6  -1    4.70    2.90
 -11  -6  -1   -1.20    2.30
  11   6   1   -1.20    1.00
 -10  -6  -2    3.50    2.80
 -10  -6  -2   -2.30    2.00
  10   6   2   -1.10    1.10
  -9  -6  -3    3.00    2.30
  -9  -6  -3    5.80    3.10
   9   6   3    5.90    1.40
  -8  -6  -4    3.30    2.90
  -8  -6  -4    4.70    2.20
   8   6   4    3.70    1.20
  -7  -6  -5    1.60    2.90
  -7  -6  -5    1.20    1.30
   7   6   5   -0.60    0.70
  -6  -6  -6    4.20    3.30
   6   6   6   11.40    1.80
  -5  -6  -7    5.60    3.20
   5   6   7    8.30    1.50
  -4  -6  -8   28.30    4.80
   4   6   8   30.00    3.10
  -3  -6  -9    4.90    2.80
   3   6   9   10.00    1.60
  -2  -6 -10    7.20    2.70
  -1  -6 -11    5.90    2.30
   1   6  11    4.40    1.10
   0  -6 -12  204.78   16.10
   0   6  12  194.38   15.50
   1  -6 -13   29.60    3.40
  -1   6  13   31.60    2.90
   2  -6 -14    0.80    1.10
  -2   6  14    2.10    0.80
   3  -6 -15   36.90    4.00
  -3   6  15   33.20    3.10
   4  -6 -16   -0.20    1.10
  -4   6  16    1.60    0.60
   5  -6 -17    3.90    2.00
  -7   6  19    3.80    1.70
  -8   6  20   -1.60    1.20
  -9   6  21    1.60    1.80
 -10   6  22   -0.30    1.40
 -11   6  23    2.30    1.90
 -12   6  24   -0.80    1.60
 -17  -5   4   -2.20    2.40
 -16  -5   3    4.30    3.10
 -15  -5   2    1.70    2.70
  15   5  -2    2.60    2.10
 -14  -5   1   -0.90    2.10
  14   5  -1    4.40    1.80
 -13  -5   0   -1.30    2.30
  13   5   0    3.40    2.00
 -12  -5  -1    1.30    2.50
  12   5   1    2.50    1.30
 -11  -5  -2    0.10    2.10
  11   5   2    0.10    1.10
 -10  -5  -3   24.30    4.80
  10   5   3   33.00    3.30
  -9  -5  -4    1.30    2.30
   9   5   4    2.40    1.00
  -8  -5  -5   12.70    3.80
   8   5   5    8.40    1.60
  -7  -5  -6   19.40    4.30
   7   5   6   20.50    2.50
  -6  -5  -7  150.58   13.00
   6   5   7  131.09   10.90
  -5  -5  -8    1.90    3.80
   5   5   8    4.70    1.30
  -4  -5  -9  104.99    9.00
   4   5   9   91.19    7.80
  -3  -5 -10    3.00    1.50
   3   5  10    5.80    1.20
  -2  -5 -11    0.70    1.20
   2   5  11    0.60    0.60
  -1  -5 -12   15.40    2.60
   1   5  12   20.30    2.20
   0  -5 -13   25.10    3.70
   0   5  13   27.20    2.70
   1  -5 -14    9.60    1.90
  -1   5  14    7.50    1.20
   2  -5 -15   28.00    3.40
  -2   5  15   22.90    2.30
   3  -5 -16   27.30    3.10
  -3   5  16   22.30    2.30
   4  -5 -17    7.00    1.90
  -4   5  17   10.00    1.30
   5  -5 -18    4.20    2.10
  -5   5  18    1.00    0.60
  -6   5  19    1.20    1.30
  -7   5  20   18.10    3.30
  -8   5  21    9.40    2.60
  -9   5  22   -0.70    1.20
 -10   5  23   -0.50    1.40
 -11   5  24    2.40    2.10
 -12   5  25    0.60    1.90
 -18  -4   4    0.60    3.50
 -17  -4   3    0.50    2.80
 -16  -4   2   -0.10    2.60
 -15  -4   1    1.70    2.60
 -14  -4   0   -0.50    2.00
  14   4   0    2.10    1.70
 -13  -4  -1    2.00    2.50
  13   4   1    4.00    1.60
 -12  -4  -2    6.30    2.80
  12   4   2    6.00    1.50
 -11  -4  -3    2.60    2.20
  11   4   3    0.00    1.00
 -10  -4  -4   -0.10    2.00
  10   4   4   -1.10    0.80
  -9  -4  -5   15.00    3.30
   9   4   5   11.00    1.70
  -8  -4  -6   52.09    6.60
   8   4   6   45.40    4.20
  -7  -4  -7   23.20    4.90
   7   4   7   27.80    2.70
  -6  -4  -8  261.67   21.20
   6   4   8  241.78   19.30
  -5  -4  -9   42.90    5.60
   5   4   9   49.20    4.20
  -4  -4 -10  196.88   15.40
   4   4  10  179.78   14.60
  -3  -4 -11  105.89    8.90
   3   4  11  101.49    8.30
  -2  -4 -12    1.00    1.10
   2   4  12    1.10    0.80
  -1  -4 -13    0.20    0.90
   1   4  13    0.00    0.60
   0  -4 -14   19.80    3.10
   0   4  14   21.70    2.20
   1  -4 -15   20.60    3.00
  -1   4  15   29.80    2.50
   2  -4 -16    1.80    1.20
  -2   4  16    2.40    0.70
   3  -4 -17   13.80    2.40
  -3   4  17   12.30    1.60
   4  -4 -18    0.40    1.10
  -4   4  18    1.20    0.70
  -5   4  19    2.20    0.70
  -5   4  19    3.10    1.50
  -6   4  20    0.50    1.20
  -7   4  21   25.70    3.90
  -8   4  22    1.00    1.50
  -9   4  23   -1.70    1.10
 -10   4  24    0.20    1.40
 -11   4  25    0.70    1.60
 -12   4  26    0.00    1.40
 -18  -3   3    1.80    3.20
 -17  -3   2    0.90    2.70
 -16  -3   1    1.30    2.80
 -15  -3   0   -0.80    2.10
 -14  -3  -1    1.70    2.60
  14   3   1    1.20    1.60
 -13  -3  -2    6.20    2.90
  13   3   2    8.30    1.80
 -12  -3  -3    6.40    2.80
  12   3   3   10.70    1.80
 -11  -3  -4   -0.50    2.20
  11   3   4    1.80    1.30
 -10  -3  -5   48.20    5.80
  10   3   5   54.09    4.70
  -9  -3  -6   35.30    5.10
   9   3   6   25.90    2.80
  -8  -3  -7   22.50    4.30
   8   3   7   28.70    2.80
  -7  -3  -8    5.30    3.00
   7   3   8    1.60    0.90
  -6  -3  -9    3.70    3.90
   6   3   9    3.30    1.10
  -5  -3 -10   36.40    4.80
   5   3  10   38.00    3.40
  -4  -3 -11   19.30    2.80
   4   3  11   19.90    2.30
  -3  -3 -12   16.30    2.60
   3   3  12   24.90    2.50
  -2  -3 -13  234.88   18.30
   2   3  13  232.28   18.10
  -1  -3 -14    8.60    1.80
   1   3  14   10.50    1.50
   0  -3 -15   59.69    6.00
   0   3  15   71.09    5.50
   1  -3 -16   47.30    4.50
  -1   3  16   47.30    4.10
   2  -3 -17    2.50    1.10
  -2   3  17    3.20    0.80
   3  -3 -18   27.40    3.50
  -3   3  18   24.60    2.40
  -4   3  19    7.10    2.30
  -4   3  19    7.40    1.20
  -4   3  19    9.60    2.00
  -5   3  20   37.80    4.40
  -5   3  20   42.10    5.80
  -5   3  20   42.80    3.70
  -6   3  21    9.60    2.20
  -6   3  21    9.10    2.90
  -7   3  22    2.80    1.50
  -7   3  22    2.90    2.20
  -8   3  23   -0.90    1.30
  -9   3  24   -0.70    1.20
 -10   3  25   -1.40    1.10
 -11   3  26    2.40    1.90
 -12   3  27   -0.80    1.30
 -18  -2   2   -0.60    2.70
 -17  -2   1    0.60    2.60
 -16  -2   0   -0.40    2.40
 -15  -2  -1    3.60    2.60
 -14  -2  -2    3.90    3.10
  14   2   2    5.10    2.10
 -13  -2  -3    5.50    2.50
  13   2   3    4.20    1.50
 -12  -2  -4   -1.80    1.70
  12   2   4    1.30    1.10
 -11  -2  -5    3.20    2.20
  11   2   5    4.80    1.40
 -10  -2  -6  134.09   11.40
  10   2   6  119.89   10.00
  -9  -2  -7    8.80    2.70
   9   2   7    6.40    1.30
  -8  -2  -8   18.50    3.80
   8   2   8   13.50    1.90
  -7  -2  -9   35.30    5.00
   7   2   9   30.80    3.10
  -6  -2 -10    8.00    3.70
  -5  -2 -11   12.30    2.60
   5   2  11   14.80    1.80
  -4  -2 -12   11.60    2.00
   4   2  12   12.00    1.60
  -3  -2 -13    5.50    1.30
   3   2  13    7.30    1.20
  -2  -2 -14   20.80    2.50
   2   2  14   27.00    2.40
  -1  -2 -15    4.10    1.20
   1   2  15    4.30    0.90
   0  -2 -16   80.29    7.30
   0   2  16   91.09    7.00
   1  -2 -17   36.60    3.70
  -1   2  17   37.60    3.40
   2  -2 -18   25.70    3.40
  -2   2  18   28.20    2.60
  -3   2  19    2.10    0.70
  -3   2  19    1.40    1.10
  -4   2  20    6.30    1.70
  -4   2  20    3.90    1.00
  -5   2  21    1.20    1.30
  -5   2  21    1.90    0.80
  -6   2  22   13.80    2.70
  -6   2  22    9.50    3.00
  -7   2  23    3.70    2.40
  -7   2  23    0.10    1.20
  -8   2  24    0.50    1.30
  -8   2  24    0.70    2.10
  -9   2  25   -0.80    1.90
  -9   2  25    1.90    1.50
 -10   2  26   -0.90    1.40
 -10   2  26    2.00    2.60
 -11   2  27    0.50    1.60
 -12   2  28    3.20    2.10
 -18  -1   1    2.60    3.10
 -17  -1   0    6.50    3.00
 -16  -1  -1    0.10    2.40
 -15  -1  -2    3.20    2.30
 -14  -1  -3    1.20    2.80
  14   1   3    2.30    2.10
 -13  -1  -4    4.80    2.30
  13   1   4    6.30    1.50
 -12  -1  -5   23.40    3.90
  12   1   5   16.90    2.30
 -11  -1  -6   36.00    5.30
  11   1   6   47.50    4.20
 -10  -1  -7   35.80    4.90
  10   1   7   33.50    3.30
  -9  -1  -8    7.20    2.60
   9   1   8    5.30    1.10
  -8  -1  -9    9.10    2.80
   8   1   9    4.90    1.20
  -7  -1 -10   68.39    7.00
   7   1  10   58.49    5.30
  -6  -1 -11    5.10    3.50
   6   1  11    4.50    1.30
  -5  -1 -12   -0.80    1.20
   5   1  12    2.90    0.90
  -4  -1 -13   84.79    6.90
   4   1  13   79.99    6.80
  -3  -1 -14    6.70    1.30
   3   1  14    3.30    0.90
  -2  -1 -15   31.60    3.10
   2   1  15   29.20    2.90
  -1  -1 -16  176.48   14.30
   1   1  16  184.68   14.10
   0  -1 -17   19.20    2.30
   0   1  17   18.70    2.20
   1  -1 -18    1.60    1.00
  -1   1  18    2.50    0.80
  -2   1  19    0.00    0.70
  -2   1  19    1.00    0.60
  -3   1  20    0.80    0.70
  -3   1  20    2.70    1.10
  -4   1  21    0.40    0.90
  -4   1  21    1.90    0.80
  -5   1  22   24.10    2.50
  -5   1  22   21.80    3.40
  -6   1  23    4.40    1.00
  -6   1  23    2.90    1.40
  -7   1  24    8.60    2.20
  -8   1  25    0.40    1.40
  -8   1  25    5.20    3.00
  -9   1  26    1.00    1.60
  -9   1  26   -0.30    2.20
 -10   1  27    6.10    2.50
 -10   1  27   10.00    3.80
 -11   1  28   -0.50    2.50
 -11   1  28   -0.10    1.50
 -18   0   0    0.50    2.60
 -17   0  -1    9.80    3.30
 -16   0  -2    0.10    2.00
 -15   0  -3    2.90    2.20
 -14   0  -4    8.00    3.10
 -13   0  -5   14.80    3.20
  13   0   5   11.90    1.90
 -12   0  -6   -0.20    1.70
  12   0   6    3.30    1.30
 -11   0  -7    4.70    2.40
  11   0   7    4.90    1.40
 -10   0  -8    3.70    2.00
  10   0   8    1.20    0.80
  -9   0  -9    9.40    2.70
   9   0   9   12.60    1.80
  -8   0 -10    1.40    2.30
   8   0  10   -0.70    0.70
  -7   0 -11   80.39    8.10
   7   0  11   86.69    7.00
  -6   0 -12  188.98   14.70
   6   0  12  173.98   14.20
  -5   0 -13   19.10    2.90
   5   0  13   27.90    2.60
  -4   0 -14   23.10    2.70
   4   0  14   21.80    2.60
  -3   0 -15   62.39    5.40
   3   0  15   61.69    5.30
  -2   0 -16   78.79    6.80
   2   0  16   88.39    6.90
  -1   0 -17   19.50    2.20
   1   0  17   17.90    2.20
   0   0 -18    0.60    0.70
   0   0  18   -0.30    0.50
  -1   0  19   45.10    4.40
  -1   0  19   49.90    4.20
  -2   0  20    4.30    1.00
  -2   0  20    1.60    0.90
  -3   0  21    0.00    0.60
  -3   0  21    1.10    0.90
  -4   0  22    7.60    1.40
  -4   0  22    4.20    1.50
  -5   0  23    7.30    1.40
  -5   0  23    6.90    1.80
  -6   0  24   12.90    2.60
  -6   0  24   12.60    1.90
  -7   0  25    1.70    1.50
  -8   0  26    1.10    1.40
  -9   0  27    2.00    1.70
  -9   0  27    1.00    2.60
 -10   0  28    0.60    1.50
 -10   0  28    1.40    2.90
 -11   0  29    3.60    2.30
 -11   0  29    0.20    2.50
 -18   1  -1    2.20    2.70
 -17   1  -2   -1.10    2.00
 -16   1  -3    6.50    2.60
 -15   1  -4    0.90    1.90
 -14   1  -5    5.10    2.80
 -13   1  -6   -0.90    1.70
  13  -1   6    1.50    1.20
 -12   1  -7    0.80    1.70
  12  -1   7    0.80    1.00
 -11   1  -8    4.70    2.30
  11  -1   8    6.40    1.40
 -10   1  -9    2.40    1.80
  10  -1   9    1.00    0.80
  -9   1 -10   45.40    5.50
   9  -1  10   45.50    4.10
  -8   1 -11    4.00    2.40
   8  -1  11    0.70    0.70
  -7   1 -12   68.39    7.10
   7  -1  12   81.69    6.40
  -6   1 -13   86.99    7.20
   6  -1  13   84.19    7.10
  -5   1 -14   15.30    1.80
   5  -1  14   17.00    2.10
  -4   1 -15    1.90    0.60
   4  -1  15    3.20    0.90
  -3   1 -16  264.77   20.00
   3  -1  16  255.67   20.20
  -2   1 -17   19.20    2.10
   2  -1  17   21.50    2.40
   1  -1  18    4.00    1.00
   1  -1  18    1.60    0.70
   0  -1  19   47.70    4.20
   0  -1  19   41.20    4.00
  -1  -1  20    7.00    1.30
  -1  -1  20    7.40    1.50
  -2  -1  21    3.00    0.90
  -2  -1  21    1.90    1.00
  -3  -1  22   -0.90    0.60
  -3  -1  22    0.20    0.70
  -4  -1  23    5.00    1.60
  -4  -1  23    7.20    1.40
  -5  -1  24    4.30    1.20
  -5  -1  24    2.80    1.50
  -6  -1  25    0.80    0.90
  -6  -1  25    1.60    1.30
  -7  -1  26   12.00    2.60
  -8  -1  27   17.70    3.40
  -9  -1  28    5.90    2.20
 -10  -1  29   -0.30    1.70
 -11  -1  30    2.10    1.90
 -11  -1  30    1.80    2.80
 -15   2  -5   14.20    3.40
 -14   2  -6   14.80    3.10
 -13   2  -7    1.90    1.80
  13  -2   7    4.00    1.30
 -12   2  -8    0.40    1.40
  12  -2   8    1.10    1.00
 -11   2  -9    7.00    2.20
  11  -2   9    7.00    1.40
 -10   2 -10    5.60    2.10
  10  -2  10    0.90    1.00
  -9   2 -11    3.00    1.90
   9  -2  11    1.40    0.90
  -8   2 -12    6.40    2.60
   8  -2  12   10.70    1.70
  -7   2 -13    0.00    1.30
   7  -2  13    1.90    0.90
  -6   2 -14    2.40    0.80
   6  -2  14    1.10    0.80
  -5   2 -15   38.00    3.20
   5  -2  15   37.80    3.50
  -4   2 -16    8.10    1.00
   4  -2  16    7.50    1.40
   3  -2  17    0.50    0.70
   2  -2  18   23.90    2.70
   2  -2  18   22.10    2.20
   1  -2  19   12.70    1.90
   1  -2  19   16.40    1.80
   0  -2  20    2.70    0.90
   0  -2  20    1.40    0.90
  -1  -2  21   -0.40    0.60
  -1  -2  21   -0.20    0.60
  -2  -2  22    4.10    1.30
  -2  -2  22    5.20    1.30
  -3  -2  23   -0.10    0.80
  -3  -2  23    1.40    0.90
  -4  -2  24   -0.60    0.80
  -4  -2  24    0.90    1.00
  -5  -2  25    2.50    1.20
  -5  -2  25    3.90    1.60
  -6  -2  26   14.70    2.20
  -6  -2  26   13.70    2.70
  -7  -2  27   30.30    4.40
  -8  -2  28    3.80    1.80
  -9  -2  29   -1.20    1.30
 -10  -2  30   -0.40    1.50
  13  -3   8    1.90    1.40
  12  -3   9    1.30    1.10
  11  -3  10   -0.10    0.90
  10  -3  11    0.10    0.90
   9  -3  12    1.20    0.80
   8  -3  13   30.90    3.20
  -7   3 -14   39.50    3.60
   7  -3  14   36.80    3.60
  -6   3 -15   93.59    7.40
   6  -3  15   99.59    7.90
   5  -3  16    0.40    0.70
   4  -3  17    1.70    0.80
   4  -3  17    1.40    0.40
   3  -3  18   25.60    2.90
   3  -3  18   25.60    2.30
   2  -3  19    5.00    1.30
   2  -3  19    4.70    0.90
   1  -3  20    2.10    0.90
   1  -3  20    1.80    0.70
   0  -3  21   -0.10    0.60
   0  -3  21    0.30    0.70
  -1  -3  22    1.10    0.80
  -1  -3  22   -0.30    0.80
  -2  -3  23    1.10    0.90
  -2  -3  23    1.20    0.90
  -3  -3  24    7.00    1.60
  -3  -3  24    6.90    1.70
  -4  -3  25    5.60    1.60
  -4  -3  25    3.30    1.30
  -5  -3  26   11.40    2.50
  -5  -3  26   12.90    2.20
  -6  -3  27   -0.70    0.90
  -6  -3  27    0.70    1.30
  -7  -3  28    0.70    3.10
  -7  -3  28    2.30    1.30
  -7  -3  28    2.20    1.50
  -8  -3  29   -0.20    1.30
  -9  -3  30    1.60    1.50
  12  -4  10    4.20    1.30
  11  -4  11   10.90    1.90
  10  -4  12   33.80    3.40
   9  -4  13   12.00    2.00
   8  -4  14    0.40    0.80
   7  -4  15   35.80    3.50
   6  -4  16    1.90    0.90
   5  -4  17   12.90    1.90
   4  -4  18    2.20    1.00
   3  -4  19    0.10    0.80
   2  -4  20    4.40    1.30
   1  -4  21    0.00    0.80
   1  -4  21    2.10    0.90
   0  -4  22    7.90    1.50
   0  -4  22    5.40    1.40
  -1  -4  23    4.10    1.20
  -1  -4  23    6.00    1.50
  -2  -4  24    4.00    1.40
  -2  -4  24    3.10    1.30
  -3  -4  25   33.70    3.80
  -3  -4  25   34.20    3.60
  -4  -4  26    1.00    1.20
  -4  -4  26    2.40    1.50
  -5  -4  27   17.70    2.70
  -5  -4  27   20.50    3.30
  -6  -4  28    2.60    1.40
  -6  -4  28    2.20    1.40
  -7  -4  29    3.20    1.70
  -7  -4  29    1.50    3.40
  -7  -4  29    1.80    1.30
  -8  -4  30    0.60    1.50
  -9  -4  31    2.50    1.80
  12  -5  11    3.20    1.70
  11  -5  12    1.80    1.10
  10  -5  13    9.20    1.80
   9  -5  14   -0.80    0.80
   8  -5  15    5.00    1.30
   7  -5  16   11.10    1.90
   6  -5  17    2.90    1.20
   5  -5  18    3.30    1.10
   4  -5  19    2.50    1.20
   3  -5  20    9.60    1.70
   2  -5  21    4.50    1.30
   1  -5  22    2.20    1.10
   0  -5  23    6.40    1.50
  -1  -5  24    5.30    1.50
  -2  -5  25   38.60    4.40
  -3  -5  26   -2.10    1.10
  -4  -5  27    7.30    1.80
  -5  -5  28    0.30    1.30
  -6  -5  29    3.90    1.60
  -6  -5  29    1.90    1.80
  -6  -5  29    4.50    4.00
  -7  -5  30    0.70    1.40
  -7  -5  30   -0.70    1.10
  -7  -5  30    1.20    3.70
  -8  -5  31   -1.30    1.40
  12  -6  12    8.70    1.80
  11  -6  13    6.40    1.90
  10  -6  14   14.40    2.20
   9  -6  15    2.40    1.10
   8  -6  16    3.10    1.20
   7  -6  17    2.60    1.10
   6  -6  18    2.10    1.10
   5  -6  19    1.20    1.00
   4  -6  20    8.70    1.80
   3  -6  21   10.60    1.90
   2  -6  22    0.10    0.90
   1  -6  23    3.20    1.40
   0  -6  24   10.10    2.00
  -1  -6  25    9.50    2.00
  -2  -6  26    0.20    1.30
  -3  -6  27   -0.50    1.20
  -4  -6  28    1.10    1.20
  -5  -6  29    7.60    1.80
  -5  -6  29   -2.10    3.10
  -6  -6  30    8.60    4.80
  -6  -6  30    3.90    1.60
  -7  -6  31    0.80    1.30
  -7  -6  31    7.80    5.10
  12  -7  13    1.20    1.30
  11  -7  14    6.80    1.80
  10  -7  15    0.20    1.20
   9  -7  16   -0.10    1.10
   8  -7  17    5.30    1.50
   7  -7  18    2.90    1.30
   6  -7  19    2.70    1.30
   5  -7  20   15.50    2.40
   4  -7  21    8.70    1.80
   3  -7  22    8.30    1.80
   2  -7  23   25.80    3.40
   1  -7  24    2.30    1.20
   0  -7  25    1.20    1.40
  -1  -7  26   11.60    2.30
  -2  -7  27   37.40    4.50
  -3  -7  28   -0.50    1.30
  -4  -7  29    2.90    1.60
  -4  -7  29    3.30    3.70
  -5  -7  30    2.80    4.10
  -5  -7  30   -0.20    1.40
  -6  -7  31   -2.00    3.70
  -6  -7  31    1.50    1.60
  11  -8  15   -0.30    1.10
  10  -8  16    5.90    1.60
   9  -8  17    5.80    1.70
   8  -8  18    3.60    1.50
   7  -8  19    3.30    1.60
   6  -8  20   -1.90    1.20
   5  -8  21    2.60    1.60
   4  -8  22   40.60    4.60
   3  -8  23    5.50    1.80
   2  -8  24    1.70    1.40
   1  -8  25   14.40    2.70
   0  -8  26    7.40    2.10
  -1  -8  27   -0.20    1.40
  -2  -8  28    0.60    1.40
  -3  -8  29    1.60    1.50
  -4  -8  30   -1.00    3.40
  -4  -8  30   -0.20    1.50
  -5  -8  31    0.60    4.10
  -5  -8  31   -0.10    1.40
  11  -9  16    6.20    1.80
  10  -9  17    2.30    1.40
   9  -9  18    0.30    1.00
   8  -9  19    0.20    1.20
   7  -9  20   -0.80    1.20
   6  -9  21    2.70    1.50
   5  -9  22   10.40    2.10
   4  -9  23    9.30    2.10
   3  -9  24   -0.10    1.30
   2  -9  25   10.00    2.30
   1  -9  26    4.10    1.70
   0  -9  27    2.40    1.50
  -1  -9  28    3.50    1.70
  -2  -9  29    0.30    1.40
  -3  -9  30    1.10    1.60
  -3  -9  30   -0.60    3.80
  -4  -9  31   -2.40    4.10
  -4  -9  31    0.20    1.70
  11 -10  17    1.00    1.30
  10 -10  18   -0.70    1.20
   9 -10  19    2.30    1.50
   8 -10  20    2.80    1.50
   7 -10  21    0.70    1.30
   6 -10  22   -0.40    1.10
   5 -10  23    6.20    1.90
   4 -10  24   -0.90    1.10
   3 -10  25    4.80    1.70
   2 -10  26   19.70    3.20
   1 -10  27    0.20    1.30
   0 -10  28    5.80    2.00
  -1 -10  29    1.70    1.80
  -1 -10  29    0.70    3.80
  -2 -10  30   -1.10    3.60
  -2 -10  30   -0.60    1.50
  10 -11  19    1.50    1.50
   9 -11  20   -1.90    1.20
   8 -11  21    3.20    1.50
   7 -11  22    0.30    1.50
   6 -11  23   -0.60    1.30
   5 -11  24    2.00    1.50
   4 -11  25    0.40    1.30
   3 -11  26    1.50    1.60
   2 -11  27    0.10    1.50
   1 -11  28    3.90    2.00
   0 -11  29    2.20    1.70
   0 -11  29    2.40    4.20
  -1 -11  30    0.20    3.80
   9 -12  21   -0.90    1.50
   8 -12  22    0.10    1.60
   7 -12  23   -0.50    1.40
   6 -12  24    0.10    1.40
   5 -12  25    1.10    1.50
   4 -12  26   -0.20    1.50
   3 -12  27   -1.50    1.40
   2 -12  28    1.30    4.70
  -4 -18   2   -0.20    4.30
   4  18  -2    2.20    2.00
  -3 -18   1    6.80    4.70
   3  18  -1   -0.50    2.10
  -2 -18   0    6.40    4.30
   2  18   0    3.20    2.50
  -1 -18  -1   10.20    4.10
   1  18   1    0.80    2.00
   0 -18  -2    1.20    3.60
   0  18   2    4.80    2.40
   1 -18  -3   -2.90    3.20
  -1  18   3    3.40    2.20
   2 -18  -4    0.60    3.40
   3 -18  -5   -1.10    2.60
  -7 -17   4    9.10    6.00
  -6 -17   3    8.90    5.60
   6  17  -3    0.10    2.50
  -5 -17   2    5.20    4.10
   5  17  -2    0.20    2.00
  -4 -17   1    2.80    3.60
   4  17  -1    2.40    2.10
  -3 -17   0    3.30    3.50
   3  17   0   -0.70    1.60
  -2 -17  -1    5.70    3.50
   2  17   1    1.40    1.90
  -1 -17  -2    6.10    3.30
   1  17   2    1.20    1.90
   0 -17  -3    4.00    3.10
   0  17   3    3.90    1.90
   1 -17  -4   10.30    3.40
  -1  17   4    5.40    2.10
   2 -17  -5    1.50    2.40
   3 -17  -6   -0.20    2.40
   4 -17  -7    2.50    2.80
   5 -17  -8    1.40    3.00
  -9 -16   5   -3.30    5.90
  -8 -16   4    8.80    5.90
   8  16  -4   -1.30    2.00
  -7 -16   3    1.50    4.70
   7  16  -3    0.70    1.90
  -6 -16   2    5.30    4.70
   6  16  -2    0.70    1.80
  -5 -16   1    3.00    4.00
   5  16  -1    1.40    1.80
  -4 -16   0    1.00    4.10
   4  16   0   -0.70    1.70
  -3 -16  -1    6.00    4.30
   3  16   1   -1.20    1.90
  -2 -16  -2   15.70    4.40
   2  16   2    9.20    2.60
  -1 -16  -3    5.70    3.60
   1  16   3   -0.40    1.50
   0 -16  -4    2.80    3.20
   0  16   4    3.20    1.70
   1 -16  -5   -4.70    2.60
  -1  16   5    0.20    1.60
   2 -16  -6   -1.70    2.30
   3 -16  -7    0.40    2.20
   4 -16  -8   -0.10    1.90
   5 -16  -9    1.30    2.30
   6 -16 -10    2.00    2.80
   7 -16 -11    0.20    2.70
 -10 -15   5    1.20    5.60
  10  15  -5    1.60    2.40
  -9 -15   4   -1.20    5.20
   9  15  -4   -3.90    1.60
  -8 -15   3    0.70    5.30
   8  15  -3    0.40    1.80
  -7 -15   2    4.60    5.00
   7  15  -2    1.20    2.00
  -6 -15   1   10.40    5.40
   6  15  -1    2.70    2.00
  -5 -15   0    0.90    3.90
   5  15   0    4.10    1.80
  -4 -15  -1    0.60    3.20
   4  15   1    6.00    2.00
  -3 -15  -2    1.20    3.20
   3  15   2    0.40    1.60
  -2 -15  -3    2.20    2.90
   2  15   3   -0.90    1.30
  -1 -15  -4    0.50    2.60
   1  15   4    0.10    1.30
   0 -15  -5    6.10    2.80
   0  15   5   -0.50    1.30
   1 -15  -6    1.20    2.30
  -1  15   6   -0.60    1.20
   2 -15  -7   -1.50    1.90
  -2  15   7    1.70    1.30
   3 -15  -8    0.30    2.10
   4 -15  -9   -0.50    2.50
   5 -15 -10   -0.30    1.90
   6 -15 -11   -4.00    1.90
   7 -15 -12    1.50    2.40
   8 -15 -13   -3.80    2.40
 -11 -14   5    1.00    4.90
  11  14  -5    1.20    2.40
 -10 -14   4    1.20    5.30
  10  14  -4   -1.20    1.60
  -9 -14   3    1.20    5.30
   9  14  -3   -0.30    1.90
  -8 -14   2    4.60    5.60
   8  14  -2   -1.10    1.90
  -7 -14   1   -0.30    5.00
   7  14  -1   -1.60    1.50
  -6 -14   0    4.00    4.70
   6  14   0    4.40    1.70
  -5 -14  -1   -0.10    3.40
   5  14   1    1.90    1.50
  -4 -14  -2   23.60    5.20
   4  14   2   10.60    2.30
  -3 -14  -3   24.70    5.30
   3  14   3   25.50    3.60
  -2 -14  -4    4.70    3.40
   2  14   4    3.70    1.80
  -1 -14  -5   -0.20    3.20
   1  14   5    4.50    1.90
   0 -14  -6    5.40    3.20
   0  14   6    6.80    1.90
   1 -14  -7    1.20    2.40
  -1  14   7    0.10    1.20
   2 -14  -8    2.70    2.40
  -2  14   8   -0.30    1.10
   3 -14  -9    1.10    2.00
   4 -14 -10   -1.40    1.80
   5 -14 -11    5.90    2.50
   6 -14 -12    0.40    2.10
   7 -14 -13   -1.30    2.30
   8 -14 -14    2.80    2.60
   9 -14 -15   -0.60    2.90
 -12 -13   5   -5.00    3.80
  12  13  -5    0.90    2.20
 -11 -13   4    0.80    4.70
  11  13  -4   -0.80    1.80
 -10 -13   3   -0.60    4.30
  10  13  -3    3.20    2.10
  -9 -13   2   -0.40    3.90
   9  13  -2   -0.90    1.60
  -8 -13   1    7.00    5.80
   8  13  -1    2.90    1.80
  -7 -13   0    5.80    4.80
   7  13   0   -0.80    1.40
  -6 -13  -1   -2.90    4.50
   6  13   1    3.20    1.80
  -5 -13  -2    8.70    4.90
   5  13   2    3.70    2.00
  -4 -13  -3    2.70    3.30
   4  13   3    0.70    1.10
  -3 -13  -4   -0.90    2.60
   3  13   4   -1.00    1.10
  -2 -13  -5    3.10    2.60
   2  13   5    0.70    1.20
  -1 -13  -6    0.00    2.10
   1  13   6    1.60    1.20
   0 -13  -7    0.50    2.10
   0  13   7    4.40    1.40
   1 -13  -8    1.40    1.90
  -1  13   8   -0.90    1.00
   2 -13  -9    4.20    3.10
  -2  13   9    4.10    1.40
   3 -13 -10    0.30    2.30
   4 -13 -11    0.00    1.80
   5 -13 -12    3.50    2.30
   6 -13 -13    0.80    2.10
   7 -13 -14   -3.20    2.30
   8 -13 -15    3.90    2.70
 -10  13  17   -1.40    1.70
 -13 -12   5    0.60    4.10
  13  12  -5   -0.20    2.20
 -12 -12   4    0.20    4.00
  12  12  -4    3.30    2.10
 -11 -12   3    7.10    5.00
  11  12  -3    4.00    2.10
 -10 -12   2    1.10    4.10
  10  12  -2   -2.10    1.40
  -9 -12   1   35.00    8.00
   9  12  -1   63.79    5.60
  -8 -12   0  218.18   21.60
   8  12   0  239.38   18.60
  -7 -12  -1   22.70    6.20
   7  12   1   19.10    2.80
  -6 -12  -2    6.30    4.50
   6  12   2    0.80    1.20
  -5 -12  -3    0.50    2.80
   5  12   3   -0.30    0.90
  -4 -12  -4    0.30    2.30
   4  12   4    0.30    1.10
  -3 -12  -5   -0.30    2.30
   3  12   5    0.80    1.20
  -2 -12  -6   -0.60    1.70
   2  12   6   -1.60    0.90
  -1 -12  -7   -1.50    1.70
   1  12   7   -0.80    1.00
   0 -12  -8    6.70    2.40
   0  12   8    7.90    1.70
   1 -12  -9   10.00    2.70
  -1  12   9    7.70    1.60
   2 -12 -10   -0.80    1.40
  -2  12  10   -0.40    0.90
   3 -12 -11    2.10    1.90
  -3  12  11    1.10    1.00
   4 -12 -12    8.00    3.80
   5 -12 -13    4.60    2.40
   6 -12 -14   -0.80    2.00
   7 -12 -15    2.20    2.30
   8 -12 -16   -0.60    2.30
 -10  12  18    0.50    1.90
 -14 -11   5    1.60    3.70
 -14 -11   5    3.50    4.20
  14  11  -5   -1.80    2.30
 -13 -11   4   -0.90    3.90
  13  11  -4    1.80    1.80
 -12 -11   3   -2.50    3.40
  12  11  -3    1.10    1.90
 -11 -11   2    1.00    3.90
  11  11  -2    3.30    1.90
 -10 -11   1    0.90    3.90
  10  11  -1    1.10    1.30
  -9 -11   0    8.80    5.70
   9  11   0    1.70    1.80
  -8 -11  -1   20.70    5.80
   8  11   1   19.90    2.90
  -7 -11  -2   28.10    6.40
   7  11   2   21.90    3.00
  -6 -11  -3   -1.10    3.60
   6  11   3    0.40    0.90
  -5 -11  -4    9.10    3.50
   5  11   4    2.10    1.20
  -4 -11  -5   -0.70    2.10
   4  11   5   -1.10    0.90
  -3 -11  -6    9.30    3.00
   3  11   6    9.30    1.80
  -2 -11  -7   -0.20    1.70
   2  11   7    2.10    1.20
  -1 -11  -8    3.90    2.20
   1  11   8    3.40    1.30
   0 -11  -9    0.30    1.60
   0  11   9    0.90    1.00
   1 -11 -10   12.60    2.80
  -1  11  10   17.40    2.20
   2 -11 -11    7.10    2.20
  -2  11  11    8.80    1.50
   3 -11 -12   -1.60    1.40
  -3  11  12    0.20    0.70
   4 -11 -13    3.00    2.00
   5 -11 -14    5.50    3.10
   6 -11 -15   -1.00    2.00
   7 -11 -16    1.10    2.10
   8 -11 -17   -3.10    2.30
  -9  11  18   -1.10    1.60
 -10  11  19    0.10    1.80
 -11  11  20   -0.30    1.80
 -15 -10   5    3.60    4.30
 -15 -10   5    4.70    4.50
  15  10  -5    3.20    2.50
 -14 -10   4    1.50    4.00
 -14 -10   4   -2.20    3.40
  14  10  -4   -1.80    1.70
 -13 -10   3   -0.40    3.40
 -13 -10   3   -0.20    3.70
  13  10  -3   -1.40    1.70
 -12 -10   2    4.80    4.00
  12  10  -2    1.40    1.60
 -11 -10   1   -4.00    3.30
  11  10  -1    2.40    1.50
 -10 -10   0    9.90    4.70
  10  10   0   20.00    3.00
  -9 -10  -1   25.30    5.90
   9  10   1   18.80    2.80
  -8 -10  -2    4.60    3.50
   8  10   2    0.40    1.00
  -7 -10  -3    5.00    4.00
   7  10   3    0.30    1.00
  -6 -10  -4    3.80    3.60
   6  10   4    7.80    1.60
  -5 -10  -5   12.60    4.10
   5  10   5    8.30    1.80
  -4 -10  -6   -0.70    2.20
   4  10   6    1.40    0.90
  -3 -10  -7    2.80    2.10
   3  10   7    2.60    1.10
  -2 -10  -8    1.10    1.50
   2  10   8    2.20    1.00
  -1 -10  -9    4.20    2.00
   1  10   9    3.00    1.10
   0 -10 -10    3.30    1.80
   0  10  10    6.00    1.30
   1 -10 -11    7.20    2.60
  -1  10  11    8.20    1.50
   2 -10 -12   -0.40    1.20
  -2  10  12   -0.20    0.80
   3 -10 -13    2.20    1.60
  -3  10  13    3.60    1.00
   4 -10 -14   11.60    2.80
   5 -10 -15    4.40    2.30
   6 -10 -16   -4.00    2.60
   7 -10 -17    4.50    2.50
  -9  10  19    0.40    1.70
 -10  10  20    0.10    1.80
 -11  10  21   -2.10    1.70
 -16  -9   5    0.00    4.20
 -15  -9   4    0.70    3.70
 -15  -9   4   -2.80    3.10
  15   9  -4    2.90    1.90
 -14  -9   3    1.20    3.10
 -14  -9   3    0.80    3.40
  14   9  -3   -0.80    1.70
 -13  -9   2    1.90    3.00
 -13  -9   2    2.00    3.10
  13   9  -2    0.40    1.60
 -12  -9   1   10.60    4.20
 -12  -9   1    3.90    3.40
  12   9  -1    6.30    1.90
 -11  -9   0    7.10    4.60
  11   9   0   -2.80    1.60
 -10  -9  -1    7.50    3.60
  10   9   1    7.40    1.80
  -9  -9  -2    8.80    3.90
   9   9   2    4.00    1.40
  -8  -9  -3    6.70    4.00
   8   9   3    5.40    1.40
  -7  -9  -4    4.30    4.30
   7   9   4   -0.60    1.20
  -6  -9  -5    2.70    3.30
   6   9   5    1.70    1.00
  -5  -9  -6   -1.90    2.20
   5   9   6    1.40    1.00
  -4  -9  -7    2.00    2.20
   4   9   7    0.30    0.80
  -3  -9  -8    1.00    1.50
   3   9   8   -0.40    0.80
  -2  -9  -9   -0.70    1.40
   2   9   9    0.30    0.80
  -1  -9 -10   42.10    4.80
   1   9  10   46.10    4.10
   0  -9 -11    3.00    1.60
   0   9  11   -0.30    0.80
   1  -9 -12   21.30    3.20
  -1   9  12   14.90    2.10
   2  -9 -13   25.60    3.70
  -2   9  13   16.80    2.20
   3  -9 -14   13.70    2.60
  -3   9  14    8.60    1.50
   4  -9 -15   -1.60    1.30
   5  -9 -16   16.50    3.40
   6  -9 -17   -2.00    1.80
   7  -9 -18    7.70    2.80
  -8   9  19   -0.80    1.60
  -9   9  20    0.90    1.80
 -10   9  21   -0.70    1.80
 -11   9  22    0.10    1.90
 -16  -8   4    3.80    4.00
 -15  -8   3   -3.50    2.20
  15   8  -3    1.60    1.90
 -14  -8   2   -0.80    2.50
 -14  -8   2    4.30    3.90
  14   8  -2   -2.40    1.80
 -13  -8   1   -0.90    3.00
 -13  -8   1   -0.30    2.70
  13   8  -1    2.20    1.70
 -12  -8   0    4.90    3.50
 -12  -8   0    3.80    3.40
  12   8   0    2.30    1.70
 -11  -8  -1   -0.10    2.50
 -11  -8  -1   -1.70    2.70
  11   8   1    1.60    1.30
 -10  -8  -2    4.30    2.90
 -10  -8  -2    5.70    3.50
  10   8   2    4.20    1.50
  -9  -8  -3    5.00    3.60
   9   8   3    3.90    1.40
  -8  -8  -4   -1.30    3.50
   8   8   4    1.20    1.20
  -7  -8  -5    3.10    3.10
   7   8   5    3.90    1.30
  -6  -8  -6    5.90    3.60
   6   8   6    5.40    1.30
  -5  -8  -7   -2.80    2.20
   5   8   7    0.40    0.80
  -4  -8  -8    3.70    2.10
   4   8   8    2.50    1.10
  -3  -8  -9   23.40    3.70
   3   8   9   15.80    2.30
  -2  -8 -10    3.40    1.70
   2   8  10    2.10    1.00
  -1  -8 -11    1.10    1.20
   1   8  11    1.20    0.90
   0  -8 -12   39.50    4.60
   0   8  12   46.60    4.00
   1  -8 -13   38.60    4.20
  -1   8  13   37.50    3.60
   2  -8 -14    2.40    1.30
  -2   8  14    1.20    0.80
   3  -8 -15    4.50    2.00
  -3   8  15    0.70    0.80
   4  -8 -16    2.40    1.50
  -4   8  16   -0.10    0.90
   5  -8 -17    5.60    2.00
   6  -8 -18   -0.40    1.60
  -8   8  20    0.80    1.40
  -9   8  21   -1.20    1.50
 -10   8  22    1.20    1.80
 -11   8  23   -1.70    1.30
 -17  -7   4    5.80    4.10
 -16  -7   3    3.60    3.40
 -15  -7   2    3.00    3.50
  15   7  -2    1.20    1.90
 -14  -7   1    2.90    3.10
  14   7  -1    2.90    1.80
 -13  -7   0   -3.20    2.80
  13   7   0   -0.20    1.50
 -12  -7  -1    1.80    2.60
  12   7   1    1.30    1.80
 -11  -7  -2   -0.50    2.60
 -11  -7  -2   -0.80    2.30
  11   7   2    0.00    1.20
 -10  -7  -3    0.90    3.00
 -10  -7  -3   -0.10    2.20
  10   7   3   -0.60    0.90
  -9  -7  -4    5.40    3.50
  -9  -7  -4    1.70    2.50
   9   7   4    6.80    1.70
  -8  -7  -5    1.20    3.10
  -8  -7  -5    0.80    1.40
   8   7   5   -1.00    0.70
  -7  -7  -6    0.00    3.10
  -7  -7  -6    3.90    1.80
   7   7   6    3.70    1.20
  -6  -7  -7    6.10    3.00
   6   7   7    7.90    1.40
  -5  -7  -8   -1.30    2.10
   5   7   8    2.40    1.00
  -4  -7  -9   -1.40    1.60
   4   7   9    2.70    1.00
  -3  -7 -10    7.20    2.10
   3   7  10    6.30    1.40
  -2  -7 -11   41.60    4.50
   2   7  11   40.20    3.80
  -1  -7 -12   85.79    7.50
   1   7  12   80.79    6.90
   0  -7 -13   47.20    4.80
   0   7  13   46.70    4.10
   1  -7 -14   82.89    7.90
  -1   7  14   94.79    7.30
   2  -7 -15   17.90    2.90
  -2   7  15   15.10    1.90
   3  -7 -16   13.50    2.60
  -3   7  16   15.80    1.90
   4  -7 -17    0.60    1.50
  -4   7  17   -0.40    0.60
   5  -7 -18   17.20    3.20
   6  -7 -19    2.40    1.90
  -7   7  20   -0.10    1.30
  -8   7  21    0.40    1.60
  -9   7  22    0.60    1.40
 -10   7  23    0.90    1.80
 -11   7  24   -1.10    1.40
 -17  -6   3    0.10    3.20
 -16  -6   2    2.00    3.20
 -15  -6   1   -1.70    2.80
  15   6  -1   -0.60    1.90
 -14  -6   0    1.80    2.90
  14   6   0   -0.20    1.60
 -13  -6  -1    5.40    4.10
  13   6   1    7.50    2.10
 -12  -6  -2   -0.20    2.50
  12   6   2    2.00    1.40
 -11  -6  -3   -1.00    2.60
  11   6   3    1.30    1.30
 -10  -6  -4    3.30    3.20
  10   6   4    2.10    1.20
  -9  -6  -5    3.80    3.10
   9   6   5    0.10    0.90
  -8  -6  -6    7.90    3.80
   8   6   6    5.10    1.30
  -7  -6  -7    3.20    3.00
   7   6   7    3.20    1.00
  -6  -6  -8    4.40    3.10
   6   6   8    2.60    1.00
  -5  -6  -9    1.90    2.20
   5   6   9    2.80    0.90
  -4  -6 -10   -0.60    1.70
   4   6  10   -0.20    0.60
  -3  -6 -11   -2.40    1.20
   3   6  11   -0.80    0.60
  -2  -6 -12    2.80    1.50
   2   6  12    0.70    0.70
  -1  -6 -13  114.99    9.20
   1   6  13   96.89    8.50
   0  -6 -14   19.90    3.10
   0   6  14   22.20    2.40
   1  -6 -15   29.40    3.40
  -1   6  15   24.70    2.60
   2  -6 -16    3.90    1.50
  -2   6  16    6.00    1.10
   3  -6 -17    3.70    1.60
  -3   6  17    4.80    1.00
   4  -6 -18   -0.70    1.70
  -4   6  18   -0.20    0.60
   5  -6 -19    2.70    1.70
  -6   6  20    2.40    1.60
  -7   6  21    3.60    1.80
  -8   6  22    0.20    1.50
  -9   6  23    1.20    1.60
 -10   6  24    0.80    1.80
 -11   6  25    0.50    1.70
 -17  -5   2    2.50    3.30
 -16  -5   1    3.80    3.40
 -15  -5   0   -0.70    2.50
  15   5   0    0.70    1.60
 -14  -5  -1    2.10    2.50
  14   5   1    2.70    1.80
 -13  -5  -2    3.00    3.00
  13   5   2    5.20    2.20
 -12  -5  -3    2.30    2.50
  12   5   3    3.40    1.40
 -11  -5  -4   -0.70    2.30
  11   5   4    1.80    1.10
 -10  -5  -5   11.90    3.80
  -9  -5  -6    2.00    3.00
   9   5   6    2.10    1.10
  -8  -5  -7   13.20    4.20
   8   5   7   11.20    1.80
  -7  -5  -8   33.80    5.90
   7   5   8   46.00    4.00
  -6  -5  -9    2.00    2.70
   6   5   9    4.10    1.10
  -5  -5 -10   -1.20    2.00
   5   5  10    1.10    0.80
  -4  -5 -11    6.00    2.20
   4   5  11    3.40    1.10
  -3  -5 -12  109.29    9.80
   3   5  12  118.79    9.30
  -2  -5 -13   60.79    5.90
   2   5  13   63.69    5.40
  -1  -5 -14   15.90    2.60
   1   5  14   19.00    2.20
   0  -5 -15   49.70    5.00
   0   5  15   51.89    4.40
   1  -5 -16    5.00    1.60
  -1   5  16    8.40    1.30
   2  -5 -17    1.50    1.10
  -2   5  17    1.60    0.80
   3  -5 -18    2.80    1.60
  -3   5  18    3.10    0.90
   4  -5 -19    1.80    1.80
  -4   5  19    1.80    0.80
  -6   5  21    9.00    2.40
  -7   5  22   13.70    2.90
  -8   5  23    3.20    2.00
  -9   5  24   -0.60    1.30
 -10   5  25    0.20    1.40
 -11   5  26    0.30    1.70
 -18  -4   2    1.10    3.20
 -17  -4   1    5.20    3.50
 -16  -4   0    2.60    3.40
 -15  -4  -1    1.00    2.60
  15   4   1    1.10    1.60
 -14  -4  -2    1.80    2.70
  14   4   2   -1.40    1.40
 -13  -4  -3   -0.40    2.40
  13   4   3    2.60    1.50
 -12  -4  -4   -1.20    2.30
  12   4   4    1.90    1.30
 -11  -4  -5    2.40    2.50
  11   4   5    1.30    1.20
 -10  -4  -6   11.20    3.60
  10   4   6    8.10    1.60
  -9  -4  -7    1.20    2.90
   9   4   7    1.70    0.90
  -8  -4  -8   15.50    3.90
   8   4   8    9.40    1.60
  -7  -4  -9   25.80    4.80
   7   4   9   14.80    2.10
  -6  -4 -10   37.60    5.70
   6   4  10   47.00    4.10
  -5  -4 -11   24.50    3.90
   5   4  11   16.50    2.30
  -4  -4 -12   59.89    6.60
   4   4  12   69.79    5.70
  -3  -4 -13   30.70    4.40
   3   4  13   34.90    3.30
  -2  -4 -14  122.69   10.30
   2   4  14  123.79    9.90
  -1  -4 -15   -0.60    0.90
   1   4  15    1.70    0.80
   0  -4 -16    1.10    1.10
   0   4  16    1.40    0.70
   1  -4 -17    2.90    1.30
  -1   4  17    7.80    1.20
   2  -4 -18    4.40    1.50
  -2   4  18    2.20    1.50
  -2   4  18    4.20    0.90
   3  -4 -19    0.00    1.10
  -3   4  19    0.30    1.20
  -3   4  19   -0.20    0.50
   4  -4 -20    5.20    1.90
  -4   4  20    6.30    2.20
  -4   4  20    4.70    1.00
  -5   4  21   30.70    3.10
  -5   4  21   26.70    3.90
  -6   4  22    6.60    2.00
  -7   4  23   17.70    3.50
  -8   4  24   -0.20    1.40
  -9   4  25    1.60    1.60
 -10   4  26    0.00    1.50
 -11   4  27   -1.40    1.40
 -18  -3   1    3.20    3.60
 -17  -3   0    0.80    2.90
 -16  -3  -1    3.40    3.40
 -15  -3  -2    0.80    2.70
 -14  -3  -3    0.10    2.50
  14   3   3    3.10    1.60
 -13  -3  -4    1.00    2.20
  13   3   4    0.60    1.20
 -12  -3  -5    2.90    2.50
  12   3   5    1.00    1.20
 -11  -3  -6   10.60    3.50
  11   3   6   10.70    1.80
 -10  -3  -7    2.30    2.30
  10   3   7    0.20    0.80
  -9  -3  -8   -0.80    2.40
   9   3   8    0.80    0.80
  -8  -3  -9    7.10    3.20
  -7  -3 -10    5.40    3.00
  -6  -3 -11   -0.90    2.20
   6   3  11    0.00    0.70
  -5  -3 -12   -0.70    1.70
   5   3  12    2.00    1.00
  -4  -3 -13   24.40    3.60
   4   3  13   22.30    2.60
  -3  -3 -14  105.09    9.00
   3   3  14  101.19    8.40
  -2  -3 -15   21.60    3.00
   2   3  15   28.50    2.70
  -1  -3 -16  278.77   21.40
   1   3  16  266.67   21.00
   0  -3 -17   -0.30    0.80
   0   3  17    1.90    0.80
   1  -3 -18    0.10    0.90
  -1   3  18    1.10    0.60
   2  -3 -19    8.10    1.90
  -2   3  19    6.00    1.20
   3  -3 -20   55.99    5.60
  -3   3  20   61.89    5.10
  -4   3  21    2.90    0.90
  -4   3  21    1.70    1.60
  -4   3  21    2.00    1.40
  -5   3  22    4.30    1.00
  -5   3  22    4.20    2.20
  -5   3  22    2.50    1.50
  -6   3  23    3.30    2.40
  -6   3  23    7.00    2.10
  -7   3  24    4.40    1.80
  -7   3  24    2.40    2.40
  -8   3  25    1.50    1.90
  -8   3  25    4.00    1.90
  -9   3  26   -0.20    1.50
 -10   3  27    0.00    1.50
 -11   3  28   -1.30    1.60
 -18  -2   0    3.60    3.50
 -17  -2  -1    6.40    3.40
 -16  -2  -2    0.10    2.60
 -15  -2  -3    0.50    2.60
 -14  -2  -4    3.80    3.20
  14   2   4    3.10    1.80
 -13  -2  -5    0.90    2.20
  13   2   5   -0.20    1.10
 -12  -2  -6   -0.40    2.20
  12   2   6    2.00    1.20
 -11  -2  -7   12.90    3.70
  11   2   7   21.80    2.50
 -10  -2  -8    3.70    2.50
  10   2   8    7.70    1.50
  -9  -2  -9    9.80    3.60
   9   2   9   17.10    2.10
  -8  -2 -10   36.50    5.60
   8   2  10   36.60    3.50
  -7  -2 -11   64.19    7.50
   7   2  11   77.69    6.20
  -6  -2 -12   80.79    7.20
   6   2  12   69.09    6.20
  -5  -2 -13    1.50    1.50
   5   2  13    4.60    1.10
  -4  -2 -14   22.30    2.80
   4   2  14   13.00    2.10
  -3  -2 -15   54.89    5.20
   3   2  15   57.89    4.90
  -2  -2 -16   64.99    5.50
   2   2  16   58.69    5.30
  -1  -2 -17   18.90    2.60
   1   2  17   23.70    2.30
   0  -2 -18    0.60    0.80
   0   2  18    1.20    0.70
   1  -2 -19   18.40    2.60
  -1   2  19   14.50    2.00
   2  -2 -20    0.80    1.00
  -2   2  20    0.30    0.60
  -3   2  21    0.20    0.60
  -3   2  21   -0.50    0.70
  -4   2  22   15.40    1.90
  -4   2  22    9.30    2.20
  -5   2  23   12.80    2.60
  -5   2  23   20.10    2.20
  -6   2  24   -0.80    1.10
  -7   2  25    0.60    2.00
  -7   2  25    3.60    1.60
  -8   2  26    1.10    1.50
  -8   2  26    3.40    2.50
  -9   2  27    1.30    1.60
  -9   2  27    0.20    2.30
 -10   2  28   -1.10    1.10
 -10   2  28    3.50    2.80
 -11   2  29   -0.10    1.50
 -18  -1  -1    0.90    3.00
 -17  -1  -2    4.30    3.10
 -16  -1  -3   -0.30    2.50
 -15  -1  -4   -0.40    2.30
 -14  -1  -5    1.70    3.20
  14   1   5    1.10    1.70
 -13  -1  -6    0.00    2.20
  13   1   6    0.50    1.10
 -12  -1  -7    4.10    2.40
  12   1   7    7.50    1.60
 -11  -1  -8    1.60    2.40
  11   1   8   -0.30    0.90
 -10  -1  -9   28.70    4.60
  10   1   9   28.10    3.00
  -9  -1 -10   17.60    4.00
   9   1  10   26.50    2.60
  -8  -1 -11  109.69   10.50
   8   1  11  115.19    9.20
  -7  -1 -12    8.30    2.90
   7   1  12   11.60    1.80
  -6  -1 -13   29.30    3.80
   6   1  13   31.40    3.00
  -5  -1 -14    7.20    1.60
   5   1  14    7.40    1.30
  -4  -1 -15   20.00    2.50
   4   1  15   26.90    2.50
  -3  -1 -16   49.80    4.20
   3   1  16   41.70    4.10
  -2  -1 -17   37.10    3.30
   2   1  17   30.80    3.20
  -1  -1 -18    2.90    1.00
   1   1  18    1.90    0.80
   0  -1 -19   45.30    4.40
   0   1  19   48.40    4.20
  -1   1  20    5.60    1.10
  -2   1  21    0.40    0.60
  -2   1  21   -0.70    0.60
  -3   1  22    1.00    1.00
  -3   1  22    0.00    0.70
  -4   1  23    5.10    1.10
  -4   1  23    1.60    1.20
  -5   1  24    6.40    2.00
  -5   1  24    6.50    1.40
  -6   1  25    9.40    2.30
  -7   1  26    9.80    2.50
  -8   1  27    0.90    2.20
  -8   1  27    0.30    1.30
  -9   1  28    2.80    1.90
  -9   1  28   -1.20    2.00
 -10   1  29    0.70    2.40
 -10   1  29    1.40    1.70
 -11   1  30   -0.10    1.40
 -11   1  30    3.30    3.30
 -18   0  -2    3.00    3.10
 -17   0  -3    5.70    3.10
 -16   0  -4    0.80    2.40
 -15   0  -5    2.30    2.60
 -14   0  -6    3.10    2.90
  14   0   6    5.90    1.80
 -13   0  -7    0.80    2.00
  13   0   7    3.90    1.40
 -12   0  -8    3.90    2.40
  12   0   8    5.80    1.40
 -11   0  -9   -2.10    2.00
  11   0   9    1.20    1.00
 -10   0 -10    1.70    2.30
  10   0  10    2.10    1.00
  -9   0 -11    1.20    2.60
   9   0  11   -0.30    0.80
  -8   0 -12   43.80    5.50
   8   0  12   42.20    4.00
  -7   0 -13   39.00    4.90
   7   0  13   47.70    4.10
  -6   0 -14   16.50    2.30
   6   0  14   12.80    1.90
  -5   0 -15   47.40    4.10
   5   0  15   44.60    4.20
  -4   0 -16    1.30    0.80
   4   0  16    2.20    0.90
  -3   0 -17    1.70    0.70
   3   0  17    0.90    0.70
  -2   0 -18    0.90    0.70
   2   0  18   -0.40    0.60
  -1   0 -19   50.49    4.50
   1   0  19   47.60    4.40
   0   0  20   55.99    4.90
  -1   0  21   10.10    1.90
  -1   0  21    9.80    1.60
  -2   0  22    0.20    0.60
  -2   0  22   -0.60    0.70
  -3   0  23   -0.50    0.70
  -3   0  23    1.00    1.00
  -4   0  24    1.40    1.10
  -4   0  24    2.10    1.00
  -5   0  25    0.20    1.10
  -5   0  25    3.70    1.10
  -6   0  26   -0.10    1.20
  -6   0  26   -0.50    0.90
  -7   0  27    0.00    1.30
  -8   0  28    1.40    1.50
  -9   0  29    0.40    3.00
  -9   0  29    2.10    1.60
 -10   0  30   -0.40    2.70
 -10   0  30    1.50    1.90
 -16   1  -5   -1.30    2.60
 -15   1  -6    0.10    2.20
 -14   1  -7   15.00    3.40
  14  -1   7    7.70    2.10
 -13   1  -8    5.20    2.40
  13  -1   8    1.70    1.20
 -12   1  -9   15.20    3.20
  12  -1   9    9.30    1.70
 -11   1 -10    7.40    2.70
  11  -1  10   10.90    1.80
 -10   1 -11   23.60    4.30
  10  -1  11   17.90    2.50
  -9   1 -12    2.60    2.50
   9  -1  12    0.70    0.80
  -8   1 -13   13.40    3.00
   8  -1  13    9.00    1.60
  -7   1 -14   20.60    2.80
   7  -1  14   22.30    2.50
  -6   1 -15    8.50    1.40
   6  -1  15    9.30    1.60
  -5   1 -16   10.20    1.40
   5  -1  16    9.20    1.50
  -4   1 -17   11.10    1.40
   4  -1  17   10.30    1.60
  -3   1 -18   17.90    1.90
   3  -1  18   16.90    2.10
  -2   1 -19    0.70    0.60
   2  -1  19   -0.20    0.60
   1  -1  20    7.30    1.30
   1  -1  20    3.70    1.10
   0  -1  21   12.30    2.00
   0  -1  21   14.10    2.00
  -1  -1  22    2.40    1.00
  -1  -1  22    0.50    0.80
  -2  -1  23    0.10    0.80
  -2  -1  23    1.30    0.90
  -3  -1  24    0.80    1.00
  -3  -1  24    3.10    1.10
  -4  -1  25    0.30    0.90
  -4  -1  25   -0.20    1.00
  -5  -1  26    5.30    1.40
  -5  -1  26    3.50    1.50
  -6  -1  27    1.70    1.30
  -6  -1  27    4.50    1.30
  -7  -1  28    2.80    1.80
  -8  -1  29    0.00    1.10
  -9  -1  30    0.30    1.60
 -10  -1  31    1.10    1.70
  13  -2   9    5.80    1.60
  12  -2  10    3.90    1.30
  11  -2  11    7.50    1.60
 -10   2 -12   14.00    3.70
  10  -2  12   16.60    2.30
  -9   2 -13    3.60    2.70
   9  -2  13    0.10    0.80
  -8   2 -14    1.40    1.70
   8  -2  14    1.60    0.90
  -7   2 -15    4.80    1.20
   7  -2  15    9.90    1.60
  -6   2 -16    3.50    0.70
   6  -2  16    3.70    1.20
  -5   2 -17   14.50    1.50
   5  -2  17   20.20    2.30
  -4   2 -18    3.20    0.70
   4  -2  18    2.70    1.00
   3  -2  19    0.20    0.60
   2  -2  20    2.00    0.90
   2  -2  20    0.90    0.60
   1  -2  21    3.30    1.10
   1  -2  21    1.50    0.80
[truncated: 211,232 more chars]
