# Supplementary material for: A Quinoxaline−Naphthaldehyde Conjugate for Colorimetric Determination of Copper Ion
Source: Molecules. 2022 May 3;27(9):2908. doi: 10.3390/molecules27092908 (PMC9105850; doi:10.3390/molecules27092908)
Supplement: Supplementary file 1 [file molecules-27-02908-s001.zip › 2156636.cif]

####################################################################### 
# 
# This file contains crystal structure data downloaded from the 
# Cambridge Structural Database (CSD) hosted by the Cambridge 
# Crystallographic Data Centre (CCDC).
# 
# Full information about CCDC data access policies and citation 
# guidelines are available at http://www.ccdc.cam.ac.uk/access/V1 
# 
# Audit and citation data items may have been added by the CCDC. 
# Please retain this information to preserve the provenance of 
# this file and to allow appropriate attribution of the data. 
# 
#######################################################################

data_QNHCu
_database_code_depnum_ccdc_archive 'CCDC 2156636'
loop_
_audit_author_name
_audit_author_address
'Michael G. B. Drew'
;University of Reading
United Kingdom
;
_audit_update_record             
;
2022-03-05 deposited with the CCDC.	2022-04-19 downloaded from the CCDC.
;

_audit_creation_method           SHELXL-2016/6
_shelx_SHELXL_version_number     2016/6
_chemical_name_systematic        ?
_chemical_name_common            ?
_chemical_melting_point          ?
_chemical_formula_moiety         ?
_chemical_formula_sum            'C32 H30 Cl0.75 Cu N6 O6.50'
_chemical_formula_weight         692.75

loop_
_atom_type_symbol
_atom_type_description
_atom_type_scat_dispersion_real
_atom_type_scat_dispersion_imag
_atom_type_scat_source
C C 0.0033 0.0016 'International Tables Vol C Tables 4.2.6.8 and 6.1.1.4'
H H 0.0000 0.0000 'International Tables Vol C Tables 4.2.6.8 and 6.1.1.4'
N N 0.0061 0.0033 'International Tables Vol C Tables 4.2.6.8 and 6.1.1.4'
O O 0.0106 0.0060 'International Tables Vol C Tables 4.2.6.8 and 6.1.1.4'
Cl Cl 0.1484 0.1585 'International Tables Vol C Tables 4.2.6.8 and 6.1.1.4'
Cu Cu 0.3201 1.2651 'International Tables Vol C Tables 4.2.6.8 and 6.1.1.4'

_space_group_crystal_system      triclinic
_space_group_IT_number           2
_space_group_name_H-M_alt        'P -1'
_space_group_name_Hall           '-P 1'

_shelx_space_group_comment       
;
The symmetry employed for this shelxl refinement is uniquely defined
by the following loop, which should always be used as a source of
symmetry information in preference to the above space-group names.
They are only intended as comments.
;

loop_
_space_group_symop_operation_xyz
'x, y, z'
'-x, -y, -z'

_cell_length_a                   14.067(4)
_cell_length_b                   15.587(4)
_cell_length_c                   15.601(4)
_cell_angle_alpha                106.091(7)
_cell_angle_beta                 91.734(7)
_cell_angle_gamma                100.266(8)
_cell_volume                     3222.4(14)
_cell_formula_units_Z            4
_cell_measurement_temperature    296(2)
_cell_measurement_reflns_used    27051
_cell_measurement_theta_min      1.363
_cell_measurement_theta_max      24.999

_exptl_crystal_description       'rectangular cuboid'
_exptl_crystal_colour            'black bronze'
_exptl_crystal_density_meas      ?
_exptl_crystal_density_method    'not measured'
_exptl_crystal_density_diffrn    1.428
_exptl_crystal_F_000             1431
_exptl_transmission_factor_min   ?
_exptl_transmission_factor_max   ?
_exptl_crystal_size_max          0.20
_exptl_crystal_size_mid          0.17
_exptl_crystal_size_min          0.11
_exptl_absorpt_coefficient_mu    0.795
_shelx_estimated_absorpt_T_min   ?
_shelx_estimated_absorpt_T_max   ?
_exptl_absorpt_correction_type   multi-scan
_exptl_absorpt_correction_T_min  0.853
_exptl_absorpt_correction_T_max  0.916
_exptl_absorpt_process_details   SADABS(Sheldrick,2008)
_exptl_absorpt_special_details   ?
_diffrn_ambient_temperature      296(2)
_diffrn_radiation_wavelength     0.71073
_diffrn_radiation_type           MoK\a
_diffrn_source                   'fine-focus sealed tube'
_diffrn_measurement_device_type  'Bruker Apex II'
_diffrn_measurement_method       'phi and omega scan'
_diffrn_detector_area_resol_mean ?
_diffrn_reflns_number            27051
_diffrn_reflns_av_unetI/netI     0.0927
_diffrn_reflns_av_R_equivalents  0.0667
_diffrn_reflns_limit_h_min       -13
_diffrn_reflns_limit_h_max       16
_diffrn_reflns_limit_k_min       -18
_diffrn_reflns_limit_k_max       18
_diffrn_reflns_limit_l_min       -18
_diffrn_reflns_limit_l_max       18
_diffrn_reflns_theta_min         1.363
_diffrn_reflns_theta_max         24.999
_diffrn_reflns_theta_full        24.999
_diffrn_measured_fraction_theta_max 0.936
_diffrn_measured_fraction_theta_full 0.997
_diffrn_reflns_Laue_measured_fraction_max 0.936
_diffrn_reflns_Laue_measured_fraction_full 0.997
_diffrn_reflns_point_group_measured_fraction_max 0.936
_diffrn_reflns_point_group_measured_fraction_full 0.997
_reflns_number_total             11126
_reflns_number_gt                7896
_reflns_threshold_expression     'I > 2\s(I)'
_reflns_Friedel_coverage         0.000
_reflns_Friedel_fraction_max     .
_reflns_Friedel_fraction_full    .

_reflns_special_details          
;
 Reflections were merged by SHELXL according to the crystal
 class for the calculation of statistics and refinement.
 
 _reflns_Friedel_fraction is defined as the number of unique
 Friedel pairs measured divided by the number that would be
 possible theoretically, ignoring centric projections and
 systematic absences.
;

_computing_data_collection       ?
_computing_cell_refinement       ?
_computing_data_reduction        ?
_computing_structure_solution    'SHELXT 2014/5 (Sheldrick, 2014)'
_computing_structure_refinement  'SHELXL-2016/6 (Sheldrick, 2016)'
_computing_molecular_graphics    ?
_computing_publication_material  ?
_refine_special_details          
;
 Refined as a 2-component twin.
;
_refine_ls_structure_factor_coef Fsqd
_refine_ls_matrix_type           full
_refine_ls_weighting_scheme      calc
_refine_ls_weighting_details     
'w=1/[\s^2^(Fo^2^)+(0.2000P)^2^] where P=(Fo^2^+2Fc^2^)/3'
_atom_sites_solution_primary     direct
_atom_sites_solution_secondary   difmap
_atom_sites_solution_hydrogens   geom
_refine_ls_hydrogen_treatment    constr
_refine_ls_extinction_method     none
_refine_ls_extinction_coef       .
_refine_ls_number_reflns         11126
_refine_ls_number_parameters     838
_refine_ls_number_restraints     12
_refine_ls_R_factor_all          0.2217
_refine_ls_R_factor_gt           0.1842
_refine_ls_wR_factor_ref         0.5019
_refine_ls_wR_factor_gt          0.4651
_refine_ls_goodness_of_fit_ref   2.051
_refine_ls_restrained_S_all      2.050
_refine_ls_shift/su_max          0.002
_refine_ls_shift/su_mean         0.000

loop_
_atom_site_label
_atom_site_type_symbol
_atom_site_fract_x
_atom_site_fract_y
_atom_site_fract_z
_atom_site_U_iso_or_equiv
_atom_site_adp_type
_atom_site_occupancy
_atom_site_site_symmetry_order
_atom_site_calc_flag
_atom_site_refinement_flags_posn
_atom_site_refinement_flags_adp
_atom_site_refinement_flags_occupancy
_atom_site_disorder_assembly
_atom_site_disorder_group
Cu1A Cu 0.06716(15) 0.86351(11) 0.52238(11) 0.0398(5) Uani 1 1 d . . . . .
Cu1B Cu 0.43335(16) 0.14721(12) 0.10041(11) 0.0429(6) Uani 1 1 d . . . . .
O1A O 0.0194(9) 0.8075(7) 0.4017(7) 0.050(3) Uani 1 1 d . . . . .
O2A O -0.0588(8) 0.7968(6) 0.5577(6) 0.041(2) Uani 1 1 d . . . . .
O3A O 0.1805(10) 0.7795(9) 0.4997(8) 0.063(3) Uani 1 1 d . . . . .
N1A N 0.1161(9) 0.9799(8) 0.4941(7) 0.036(3) Uani 1 1 d . . . . .
N2A N 0.1615(9) 1.0616(7) 0.5544(7) 0.033(3) Uani 1 1 d . . . . .
N3A N 0.1163(9) 0.9089(8) 0.6504(7) 0.034(3) Uani 1 1 d . . . . .
N4A N 0.1724(9) 0.9940(8) 0.8372(7) 0.036(3) Uani 1 1 d . . . . .
N5A N -0.1808(11) 0.6786(9) 0.5363(11) 0.054(4) Uani 1 1 d . . . . .
N6A N 0.2396(14) 0.6651(11) 0.4151(10) 0.063(4) Uani 1 1 d . . . . .
C1A C 0.0284(11) 0.8351(10) 0.3316(9) 0.038(3) Uani 1 1 d . . . . .
C2A C -0.0066(14) 0.7696(10) 0.2491(9) 0.046(4) Uani 1 1 d . . . . .
H2A H -0.035305 0.710765 0.248310 0.055 Uiso 1 1 calc R U . . .
C3A C 0.0012(13) 0.7916(12) 0.1716(10) 0.053(4) Uani 1 1 d . . . . .
H3A H -0.019281 0.746491 0.117922 0.064 Uiso 1 1 calc R U . . .
C4A C 0.0403(14) 0.8825(13) 0.1694(10) 0.052(4) Uani 1 1 d . . . . .
C5A C 0.0477(14) 0.9056(15) 0.0884(11) 0.060(5) Uani 1 1 d . . . . .
H5A H 0.023765 0.861476 0.034884 0.072 Uiso 1 1 calc R U . . .
C6A C 0.0891(16) 0.9913(16) 0.0864(11) 0.067(6) Uani 1 1 d . . . . .
H6A H 0.094826 1.004431 0.031936 0.081 Uiso 1 1 calc R U . . .
C7A C 0.1232(16) 1.0596(14) 0.1672(12) 0.062(5) Uani 1 1 d . . . . .
H7A H 0.152244 1.117809 0.166395 0.074 Uiso 1 1 calc R U . . .
C8A C 0.1130(15) 1.0393(12) 0.2469(10) 0.052(4) Uani 1 1 d . . . . .
H8A H 0.132234 1.085387 0.300134 0.063 Uiso 1 1 calc R U . . .
C9A C 0.0750(11) 0.9525(11) 0.2507(9) 0.041(4) Uani 1 1 d . . . . .
C10A C 0.0720(11) 0.9235(11) 0.3328(9) 0.039(3) Uani 1 1 d . . . . .
C11A C 0.1091(11) 0.9905(10) 0.4144(8) 0.036(3) Uani 1 1 d . . . . .
H11A H 0.130988 1.049111 0.410528 0.043 Uiso 1 1 calc R U . . .
C12A C 0.1738(11) 1.0655(9) 0.6376(9) 0.036(3) Uani 1 1 d . . . . .
C13A C 0.2167(12) 1.1509(10) 0.7075(10) 0.044(4) Uani 1 1 d . . . . .
C14A C 0.2488(13) 1.2356(11) 0.6972(11) 0.051(4) Uani 1 1 d . . . . .
H14A H 0.247743 1.245056 0.640925 0.062 Uiso 1 1 calc R U . . .
C15A C 0.2824(15) 1.3059(11) 0.7727(12) 0.059(5) Uani 1 1 d . . . . .
H15A H 0.305962 1.363863 0.767819 0.070 Uiso 1 1 calc R U . . .
C16A C 0.2816(16) 1.2913(13) 0.8560(13) 0.069(6) Uani 1 1 d . . . . .
H16A H 0.304582 1.340526 0.905982 0.083 Uiso 1 1 calc R U . . .
C17A C 0.2470(12) 1.2036(10) 0.8693(10) 0.047(4) Uani 1 1 d . . . . .
H17A H 0.246430 1.193619 0.925375 0.056 Uiso 1 1 calc R U . . .
C18A C 0.2145(11) 1.1351(10) 0.7895(8) 0.037(3) Uani 1 1 d . . . . .
C19A C 0.1789(11) 1.0383(9) 0.7785(8) 0.034(3) Uani 1 1 d . . . . .
C20A C 0.1391(10) 0.9007(9) 0.8040(9) 0.033(3) Uani 1 1 d . . . . .
C21A C 0.1350(14) 0.8479(13) 0.8652(10) 0.055(4) Uani 1 1 d . . . . .
H21A H 0.156352 0.875772 0.925137 0.066 Uiso 1 1 calc R U . . .
C22A C 0.1003(13) 0.7573(11) 0.8367(11) 0.051(4) Uani 1 1 d . . . . .
H22A H 0.094634 0.723727 0.877813 0.061 Uiso 1 1 calc R U . . .
C23A C 0.0726(14) 0.7130(12) 0.7450(11) 0.054(4) Uani 1 1 d . . . . .
H23A H 0.049998 0.650367 0.726139 0.064 Uiso 1 1 calc R U . . .
C24A C 0.0789(13) 0.7620(9) 0.6833(10) 0.044(4) Uani 1 1 d . . . . .
H24A H 0.062269 0.732424 0.622804 0.053 Uiso 1 1 calc R U . . .
C25A C 0.1110(11) 0.8578(9) 0.7128(8) 0.036(3) Uani 1 1 d . . . . .
C26A C 0.1502(11) 0.9953(10) 0.6845(9) 0.035(3) Uani 1 1 d . . . . .
C27A C -0.1146(13) 0.7310(11) 0.5087(12) 0.049(4) Uani 1 1 d . . . . .
H27A H -0.109108 0.717855 0.447376 0.059 Uiso 1 1 calc R U . . .
C28A C -0.1880(17) 0.6902(15) 0.6313(15) 0.076(6) Uani 1 1 d . . . . .
H28D H -0.240866 0.645745 0.639549 0.114 Uiso 1 1 calc R U . . .
H28E H -0.128686 0.682328 0.657475 0.114 Uiso 1 1 calc R U . . .
H28F H -0.199146 0.750174 0.659638 0.114 Uiso 1 1 calc R U . . .
C29A C -0.2424(19) 0.5998(15) 0.4716(18) 0.089(8) Uani 1 1 d . . . . .
H29D H -0.287535 0.568214 0.502720 0.134 Uiso 1 1 calc R U . . .
H29E H -0.277368 0.620280 0.429702 0.134 Uiso 1 1 calc R U . . .
H29F H -0.202624 0.559506 0.439992 0.134 Uiso 1 1 calc R U . . .
C30A C 0.1708(16) 0.7065(12) 0.4448(12) 0.061(5) Uani 1 1 d . . . . .
H30A H 0.107919 0.677449 0.421767 0.074 Uiso 1 1 calc R U . . .
C31A C 0.218(3) 0.5733(16) 0.3476(16) 0.102(10) Uani 1 1 d . . . . .
H31D H 0.229700 0.528122 0.375716 0.154 Uiso 1 1 calc R U . . .
H31E H 0.259529 0.573067 0.299733 0.154 Uiso 1 1 calc R U . . .
H31F H 0.151639 0.559816 0.324133 0.154 Uiso 1 1 calc R U . . .
C32A C 0.339(2) 0.702(3) 0.446(2) 0.133(14) Uani 1 1 d . . . . .
H32D H 0.345418 0.765209 0.479262 0.200 Uiso 1 1 calc R U . . .
H32E H 0.377259 0.697518 0.395606 0.200 Uiso 1 1 calc R U . . .
H32F H 0.360769 0.669329 0.483791 0.200 Uiso 1 1 calc R U . . .
N1B N 0.3870(9) 0.0295(7) 0.0071(7) 0.034(3) Uani 1 1 d . . . . .
N2B N 0.3459(10) -0.0526(8) 0.0217(8) 0.041(3) Uani 1 1 d . . . . .
N3B N 0.3887(9) 0.1013(8) 0.2050(8) 0.037(3) Uani 1 1 d . . . . .
N4B N 0.3324(10) 0.0188(9) 0.3407(8) 0.039(3) Uani 1 1 d . . . . .
N5B N 0.6805(11) 0.3355(12) 0.2263(13) 0.072(5) Uani 1 1 d . . . . .
N6B N 0.2496(13) 0.3465(12) 0.1075(11) 0.065(4) Uani 1 1 d . . . . .
O1B O 0.4766(9) 0.2046(7) 0.0128(7) 0.047(3) Uani 1 1 d . . . . .
O2B O 0.5622(9) 0.2154(8) 0.1764(8) 0.053(3) Uani 1 1 d . . . . .
O3B O 0.3157(10) 0.2288(9) 0.1217(9) 0.061(3) Uani 1 1 d . . . . .
C1B C 0.4707(13) 0.1749(11) -0.0727(11) 0.048(4) Uani 1 1 d . U . . .
C2B C 0.5069(14) 0.2394(12) -0.1201(13) 0.057(5) Uani 1 1 d . . . . .
H2B H 0.534117 0.298850 -0.087569 0.069 Uiso 1 1 calc R U . . .
C3B C 0.5026(13) 0.2161(13) -0.2108(12) 0.054(4) Uani 1 1 d . . . . .
H3B H 0.524877 0.259434 -0.240020 0.065 Uiso 1 1 calc R U . . .
C4B C 0.4632(12) 0.1240(12) -0.2609(10) 0.048(4) Uani 1 1 d . . . . .
C5B C 0.4558(13) 0.0970(14) -0.3584(10) 0.053(4) Uani 1 1 d . . . . .
H5B H 0.478407 0.139595 -0.388325 0.064 Uiso 1 1 calc R U . . .
C6B C 0.4163(14) 0.0110(14) -0.4054(10) 0.057(5) Uani 1 1 d . . . . .
H6B H 0.410934 -0.005456 -0.467619 0.068 Uiso 1 1 calc R U . . .
C7B C 0.3847(17) -0.0512(14) -0.3628(11) 0.065(5) Uani 1 1 d . . . . .
H7B H 0.357534 -0.110150 -0.396969 0.078 Uiso 1 1 calc R U . . .
C8B C 0.3906(15) -0.0322(13) -0.2718(11) 0.058(5) Uani 1 1 d . . . . .
H8B H 0.369511 -0.077922 -0.245202 0.069 Uiso 1 1 calc R U . . .
C9B C 0.4288(12) 0.0571(11) -0.2183(10) 0.043(4) Uani 1 1 d . . . . .
C10B C 0.4318(11) 0.0829(10) -0.1213(9) 0.034(3) Uani 1 1 d . . . . .
C11B C 0.3958(11) 0.0198(10) -0.0762(9) 0.037(3) Uani 1 1 d . . . . .
H11B H 0.374724 -0.039282 -0.112949 0.044 Uiso 1 1 calc R U . . .
C12B C 0.3335(11) -0.0550(9) 0.1015(9) 0.035(3) Uani 1 1 d . . . . .
C13B C 0.2944(12) -0.1398(10) 0.1223(10) 0.040(3) Uani 1 1 d . . . . .
C14B C 0.2608(13) -0.2247(11) 0.0661(12) 0.053(4) Uani 1 1 d . . . . .
H14B H 0.260829 -0.235314 0.004400 0.063 Uiso 1 1 calc R U . . .
C15B C 0.2265(16) -0.2955(13) 0.1020(16) 0.070(6) Uani 1 1 d . . . . .
H15B H 0.205734 -0.354536 0.064881 0.084 Uiso 1 1 calc R U . . .
C16B C 0.2235(15) -0.2759(14) 0.1983(15) 0.064(5) Uani 1 1 d . . . . .
H16B H 0.198944 -0.322751 0.222454 0.077 Uiso 1 1 calc R U . . .
C17B C 0.2551(14) -0.1928(12) 0.2526(13) 0.055(4) Uani 1 1 d . . . . .
H17B H 0.252310 -0.181387 0.314104 0.065 Uiso 1 1 calc R U . . .
C18B C 0.2926(11) -0.1226(10) 0.2166(10) 0.039(3) Uani 1 1 d . . . . .
C19B C 0.3284(11) -0.0251(10) 0.2572(9) 0.038(3) Uani 1 1 d . . . . .
C20B C 0.3668(12) 0.1095(10) 0.3607(10) 0.041(3) Uani 1 1 d . . . . .
C21B C 0.3737(14) 0.1619(13) 0.4498(10) 0.054(4) Uani 1 1 d . . . . .
H21B H 0.353167 0.134536 0.493699 0.065 Uiso 1 1 calc R U . . .
C22B C 0.4107(15) 0.2539(13) 0.4730(11) 0.059(5) Uani 1 1 d . . . . .
H22B H 0.418244 0.287896 0.532859 0.071 Uiso 1 1 calc R U . . .
C23B C 0.4368(13) 0.2959(12) 0.4077(11) 0.053(4) Uani 1 1 d . . . . .
H23B H 0.460244 0.358365 0.424063 0.063 Uiso 1 1 calc R U . . .
C24B C 0.4287(12) 0.2468(10) 0.3189(10) 0.043(4) Uani 1 1 d . . . . .
H24B H 0.444441 0.276946 0.275949 0.052 Uiso 1 1 calc R U . . .
C25B C 0.3974(11) 0.1531(10) 0.2922(9) 0.039(3) Uani 1 1 d . . . . .
C26B C 0.3551(11) 0.0158(9) 0.1886(9) 0.035(3) Uani 1 1 d . . . . .
C27B C 0.6152(14) 0.2783(14) 0.1664(13) 0.061(5) Uani 1 1 d . . . . .
H27B H 0.610331 0.288430 0.110552 0.074 Uiso 1 1 calc R U . . .
C28B C 0.690(2) 0.325(2) 0.3156(18) 0.101(9) Uani 1 1 d . . . . .
H28A H 0.740913 0.372608 0.351133 0.152 Uiso 1 1 calc R U . . .
H28B H 0.630094 0.330094 0.342738 0.152 Uiso 1 1 calc R U . . .
H28C H 0.705467 0.267105 0.312163 0.152 Uiso 1 1 calc R U . . .
C29B C 0.737(2) 0.4167(16) 0.212(2) 0.107(10) Uani 1 1 d . . . . .
H29A H 0.780130 0.448909 0.264454 0.161 Uiso 1 1 calc R U . . .
H29B H 0.773248 0.400313 0.161392 0.161 Uiso 1 1 calc R U . . .
H29C H 0.693841 0.455041 0.201853 0.161 Uiso 1 1 calc R U . . .
C30B C 0.3196(16) 0.3045(13) 0.1112(12) 0.061(5) Uani 1 1 d . . . . .
H30B H 0.380934 0.335349 0.105337 0.073 Uiso 1 1 calc R U . . .
C31B C 0.262(2) 0.4360(16) 0.0993(19) 0.103(9) Uani 1 1 d . . . . .
H31A H 0.329401 0.461663 0.103501 0.155 Uiso 1 1 calc R U . . .
H31B H 0.231352 0.472772 0.146435 0.155 Uiso 1 1 calc R U . . .
H31C H 0.231919 0.434163 0.042398 0.155 Uiso 1 1 calc R U . . .
C32B C 0.146(2) 0.289(3) 0.107(2) 0.138(15) Uani 1 1 d . . . . .
H32A H 0.150259 0.242845 0.136287 0.207 Uiso 1 1 calc R U . . .
H32B H 0.119312 0.259765 0.045895 0.207 Uiso 1 1 calc R U . . .
H32C H 0.104281 0.327603 0.137281 0.207 Uiso 1 1 calc R U . . .
O1W O 0.9778(11) 0.4930(10) 0.0922(13) 0.090(5) Uani 1 1 d . . . . .
Cl1 Cl 0.4893(5) 0.5128(4) 0.2947(5) 0.0868(18) Uani 1 1 d . . . . .
O1 O 0.473(3) 0.5938(18) 0.287(4) 0.30(3) Uani 1 1 d . . . . .
O2 O 0.557(3) 0.523(3) 0.366(3) 0.243(18) Uani 1 1 d . U . . .
O3 O 0.522(3) 0.459(3) 0.221(3) 0.27(3) Uani 1 1 d . . . . .
O4 O 0.388(2) 0.458(2) 0.3013(17) 0.156(10) Uani 1 1 d . . . . .
Cl2 Cl 1.000000 0.500000 0.500000 0.159(7) Uani 1 2 d S . P . .
O5 O 1.102(3) 0.561(3) 0.543(3) 0.105(11) Uiso 0.5 1 d . . P . .
O6 O 0.993(4) 0.420(4) 0.483(4) 0.145(17) Uiso 0.5 1 d . . P . .
O7 O 0.950(4) 0.550(4) 0.566(4) 0.140(16) Uiso 0.5 1 d . . P . .
O8 O 0.982(7) 0.540(6) 0.411(6) 0.23(4) Uiso 0.5 1 d . . P . .

loop_
_atom_site_aniso_label
_atom_site_aniso_U_11
_atom_site_aniso_U_22
_atom_site_aniso_U_33
_atom_site_aniso_U_23
_atom_site_aniso_U_13
_atom_site_aniso_U_12
Cu1A 0.0527(13) 0.0403(9) 0.0250(8) 0.0069(7) -0.0005(7) 0.0102(8)
Cu1B 0.0546(13) 0.0434(9) 0.0321(9) 0.0138(7) 0.0074(8) 0.0076(9)
O1A 0.062(8) 0.055(6) 0.030(5) 0.002(4) 0.001(5) 0.015(6)
O2A 0.046(7) 0.042(5) 0.033(5) 0.008(4) -0.003(5) 0.008(5)
O3A 0.074(9) 0.061(7) 0.046(6) -0.006(5) 0.011(6) 0.025(7)
N1A 0.038(8) 0.047(6) 0.025(6) 0.009(5) 0.005(5) 0.016(6)
N2A 0.038(7) 0.038(6) 0.024(5) 0.008(4) 0.004(5) 0.010(5)
N3A 0.036(7) 0.042(6) 0.027(5) 0.013(5) 0.001(5) 0.013(5)
N4A 0.036(7) 0.046(6) 0.023(5) 0.006(5) 0.001(5) 0.011(5)
N5A 0.039(9) 0.048(7) 0.072(10) 0.013(7) -0.003(7) 0.009(7)
N6A 0.084(13) 0.067(9) 0.051(8) 0.012(7) 0.022(8) 0.051(9)
C1A 0.026(8) 0.057(8) 0.027(7) 0.006(6) -0.003(6) 0.011(7)
C2A 0.064(12) 0.042(7) 0.033(7) 0.003(6) -0.008(7) 0.028(8)
C3A 0.048(11) 0.067(10) 0.031(8) -0.004(7) 0.000(7) 0.007(8)
C4A 0.055(11) 0.079(11) 0.027(7) 0.016(7) 0.005(7) 0.026(9)
C5A 0.055(12) 0.091(14) 0.038(9) 0.017(8) 0.005(8) 0.028(10)
C6A 0.078(15) 0.106(16) 0.034(9) 0.032(9) 0.011(9) 0.040(13)
C7A 0.071(14) 0.075(11) 0.054(10) 0.033(9) 0.010(9) 0.028(10)
C8A 0.072(13) 0.066(10) 0.029(7) 0.017(7) 0.003(7) 0.035(9)
C9A 0.033(9) 0.064(9) 0.025(7) 0.002(6) 0.007(6) 0.024(7)
C10A 0.034(9) 0.060(9) 0.029(7) 0.017(6) 0.013(6) 0.014(7)
C11A 0.042(9) 0.046(7) 0.021(6) 0.005(5) 0.013(6) 0.017(7)
C12A 0.035(9) 0.040(7) 0.033(7) 0.005(5) 0.010(6) 0.012(6)
C13A 0.048(10) 0.047(8) 0.037(7) 0.000(6) 0.005(7) 0.029(7)
C14A 0.053(11) 0.055(9) 0.047(9) 0.014(7) 0.008(8) 0.015(8)
C15A 0.064(13) 0.042(8) 0.059(11) 0.006(7) -0.009(9) -0.004(8)
C16A 0.069(14) 0.059(10) 0.061(12) -0.006(9) -0.012(10) 0.007(10)
C17A 0.048(10) 0.047(8) 0.036(8) 0.000(6) 0.003(7) 0.007(7)
C18A 0.037(8) 0.045(7) 0.026(6) -0.001(5) 0.000(6) 0.021(6)
C19A 0.042(9) 0.037(7) 0.021(6) 0.001(5) 0.010(6) 0.012(6)
C20A 0.027(8) 0.047(7) 0.026(6) 0.013(5) 0.003(6) 0.012(6)
C21A 0.065(12) 0.073(11) 0.032(8) 0.025(7) 0.013(8) 0.011(9)
C22A 0.051(11) 0.059(9) 0.051(9) 0.032(7) 0.004(8) 0.010(8)
C23A 0.064(13) 0.051(9) 0.050(9) 0.023(7) 0.002(8) 0.007(8)
C24A 0.058(11) 0.037(7) 0.034(7) 0.006(6) -0.005(7) 0.008(7)
C25A 0.040(9) 0.037(7) 0.029(7) 0.005(6) 0.011(6) 0.006(6)
C26A 0.037(9) 0.046(7) 0.028(6) 0.009(5) 0.005(6) 0.029(7)
C27A 0.041(10) 0.052(9) 0.050(9) 0.004(7) -0.006(8) 0.017(8)
C28A 0.059(14) 0.077(13) 0.089(16) 0.023(11) 0.011(11) 0.003(11)
C29A 0.077(17) 0.066(12) 0.101(18) 0.005(12) -0.026(14) -0.009(11)
C30A 0.078(15) 0.060(10) 0.048(10) 0.015(8) 0.014(9) 0.015(10)
C31A 0.17(3) 0.078(15) 0.064(13) 0.006(11) 0.018(16) 0.057(17)
C32A 0.051(17) 0.18(3) 0.15(3) 0.01(3) 0.018(18) 0.040(19)
N1B 0.034(7) 0.041(6) 0.028(6) 0.015(5) 0.005(5) 0.003(5)
N2B 0.044(8) 0.051(7) 0.029(6) 0.013(5) 0.002(5) 0.007(6)
N3B 0.036(7) 0.046(6) 0.032(6) 0.015(5) -0.001(5) 0.010(5)
N4B 0.042(8) 0.057(7) 0.031(6) 0.024(5) 0.006(5) 0.022(6)
N5B 0.032(9) 0.071(10) 0.096(13) -0.006(9) 0.011(9) 0.008(8)
N6B 0.069(12) 0.078(10) 0.057(9) 0.019(8) -0.007(8) 0.039(9)
O1B 0.065(8) 0.041(5) 0.038(6) 0.018(4) 0.013(5) 0.006(5)
O2B 0.055(8) 0.055(6) 0.051(6) 0.019(5) 0.010(6) 0.006(6)
O3B 0.063(9) 0.066(8) 0.062(8) 0.025(6) 0.005(6) 0.019(6)
C1B 0.049(6) 0.050(5) 0.045(5) 0.017(4) 0.004(4) 0.007(4)
C2B 0.058(12) 0.057(9) 0.066(11) 0.032(8) 0.018(9) 0.013(9)
C3B 0.047(11) 0.074(11) 0.055(10) 0.039(8) 0.015(8) 0.015(9)
C4B 0.040(10) 0.075(11) 0.042(8) 0.025(7) 0.011(7) 0.031(8)
C5B 0.047(11) 0.093(13) 0.035(8) 0.038(9) 0.011(7) 0.020(9)
C6B 0.055(12) 0.098(14) 0.028(8) 0.024(8) 0.018(8) 0.029(10)
C7B 0.099(17) 0.074(11) 0.028(8) 0.013(8) 0.020(9) 0.033(11)
C8B 0.078(14) 0.070(11) 0.034(8) 0.014(7) 0.027(9) 0.037(10)
C9B 0.044(10) 0.067(9) 0.037(8) 0.028(7) 0.008(7) 0.032(8)
C10B 0.032(8) 0.049(8) 0.028(7) 0.015(6) 0.003(6) 0.018(6)
C11B 0.040(9) 0.048(7) 0.029(7) 0.017(6) 0.007(6) 0.016(7)
C12B 0.035(9) 0.036(7) 0.037(7) 0.017(6) 0.004(6) 0.006(6)
C13B 0.043(9) 0.043(7) 0.044(8) 0.024(6) 0.005(7) 0.015(7)
C14B 0.050(11) 0.059(9) 0.047(9) 0.015(7) 0.009(8) 0.004(8)
C15B 0.059(13) 0.049(9) 0.098(16) 0.026(10) 0.002(11) -0.003(9)
C16B 0.050(12) 0.072(12) 0.091(15) 0.056(11) 0.019(10) 0.010(9)
C17B 0.059(12) 0.056(10) 0.068(11) 0.039(8) 0.034(9) 0.022(9)
C18B 0.036(9) 0.051(8) 0.040(7) 0.025(6) 0.015(6) 0.015(6)
C19B 0.037(9) 0.051(8) 0.038(8) 0.026(6) 0.005(6) 0.018(7)
C20B 0.038(9) 0.046(8) 0.045(8) 0.016(6) 0.005(7) 0.013(7)
C21B 0.068(13) 0.079(12) 0.027(7) 0.023(7) 0.011(7) 0.029(10)
C22B 0.068(13) 0.078(12) 0.031(8) 0.005(7) 0.003(8) 0.032(10)
C23B 0.051(11) 0.057(9) 0.043(9) -0.003(7) 0.005(8) 0.018(8)
C24B 0.050(10) 0.049(8) 0.030(7) 0.006(6) 0.004(7) 0.016(7)
C25B 0.028(8) 0.059(9) 0.032(7) 0.010(6) 0.004(6) 0.018(7)
C26B 0.039(9) 0.045(8) 0.025(6) 0.013(5) 0.008(6) 0.017(6)
C27B 0.051(12) 0.070(11) 0.058(11) 0.009(9) 0.028(9) 0.008(10)
C28B 0.076(19) 0.12(2) 0.085(18) 0.001(15) -0.017(14) -0.002(15)
C29B 0.09(2) 0.060(13) 0.17(3) 0.033(16) 0.007(18) -0.009(12)
C30B 0.066(14) 0.064(11) 0.049(10) 0.016(8) -0.006(9) 0.004(10)
C31B 0.14(3) 0.070(14) 0.105(19) 0.010(13) 0.005(18) 0.063(16)
C32B 0.08(2) 0.24(4) 0.15(3) 0.12(3) 0.06(2) 0.07(3)
O1W 0.055(9) 0.074(9) 0.142(15) 0.057(10) -0.033(9) -0.020(7)
Cl1 0.074(4) 0.066(3) 0.110(5) 0.004(3) 0.000(3) 0.023(3)
O1 0.31(5) 0.107(18) 0.59(8) 0.17(3) 0.32(5) 0.14(3)
O2 0.24(2) 0.25(2) 0.24(2) 0.065(11) 0.010(10) 0.041(10)
O3 0.19(3) 0.32(5) 0.23(4) -0.10(3) 0.02(3) 0.17(3)
O4 0.17(3) 0.16(2) 0.126(19) 0.041(17) 0.017(18) 0.006(19)
Cl2 0.129(10) 0.055(5) 0.286(19) 0.019(7) 0.127(12) 0.030(5)

_geom_special_details            
;
 All esds (except the esd in the dihedral angle between two l.s. planes)
 are estimated using the full covariance matrix.  The cell esds are taken
 into account individually in the estimation of esds in distances, angles
 and torsion angles; correlations between esds in cell parameters are only
 used when they are defined by crystal symmetry.  An approximate (isotropic)
 treatment of cell esds is used for estimating esds involving l.s. planes.
;

loop_
_geom_bond_atom_site_label_1
_geom_bond_atom_site_label_2
_geom_bond_distance
_geom_bond_site_symmetry_2
_geom_bond_publ_flag
Cu1A O1A 1.887(10) . ?
Cu1A N3A 1.982(11) . ?
Cu1A N1A 1.994(12) . ?
Cu1A O2A 2.060(11) . ?
Cu1A O3A 2.215(13) . ?
Cu1B O1B 1.890(10) . ?
Cu1B N1B 1.987(11) . ?
Cu1B N3B 2.029(12) . ?
Cu1B O2B 2.074(12) . ?
Cu1B O3B 2.240(13) . ?
O1A C1A 1.284(18) . ?
O2A C27A 1.222(19) . ?
O3A C30A 1.20(2) . ?
N1A C11A 1.302(18) . ?
N1A N2A 1.387(16) . ?
N2A C12A 1.287(18) . ?
N3A C26A 1.298(19) . ?
N3A C25A 1.414(17) . ?
N4A C19A 1.286(18) . ?
N4A C20A 1.388(18) . ?
N5A C27A 1.29(2) . ?
N5A C28A 1.45(3) . ?
N5A C29A 1.47(2) . ?
N6A C30A 1.29(2) . ?
N6A C32A 1.43(3) . ?
N6A C31A 1.50(3) . ?
C1A C10A 1.40(2) . ?
C1A C2A 1.413(19) . ?
C2A C3A 1.35(2) . ?
C2A H2A 0.9300 . ?
C3A C4A 1.44(3) . ?
C3A H3A 0.9300 . ?
C4A C5A 1.41(2) . ?
C4A C9A 1.43(2) . ?
C5A C6A 1.37(3) . ?
C5A H5A 0.9300 . ?
C6A C7A 1.41(3) . ?
C6A H6A 0.9300 . ?
C7A C8A 1.37(2) . ?
C7A H7A 0.9300 . ?
C8A C9A 1.38(2) . ?
C8A H8A 0.9300 . ?
C9A C10A 1.47(2) . ?
C10A C11A 1.42(2) . ?
C11A H11A 0.9300 . ?
C12A C26A 1.47(2) . ?
C12A C13A 1.48(2) . ?
C13A C18A 1.37(2) . ?
C13A C14A 1.37(2) . ?
C14A C15A 1.37(2) . ?
C14A H14A 0.9300 . ?
C15A C16A 1.38(3) . ?
C15A H15A 0.9300 . ?
C16A C17A 1.44(3) . ?
C16A H16A 0.9300 . ?
C17A C18A 1.399(19) . ?
C17A H17A 0.9300 . ?
C18A C19A 1.46(2) . ?
C19A C26A 1.445(18) . ?
C20A C25A 1.404(18) . ?
C20A C21A 1.42(2) . ?
C21A C22A 1.35(2) . ?
C21A H21A 0.9300 . ?
C22A C23A 1.41(2) . ?
C22A H22A 0.9300 . ?
C23A C24A 1.38(2) . ?
C23A H23A 0.9300 . ?
C24A C25A 1.418(19) . ?
C24A H24A 0.9300 . ?
C27A H27A 0.9300 . ?
C28A H28D 0.9600 . ?
C28A H28E 0.9600 . ?
C28A H28F 0.9600 . ?
C29A H29D 0.9600 . ?
C29A H29E 0.9600 . ?
C29A H29F 0.9600 . ?
C30A H30A 0.9300 . ?
C31A H31D 0.9600 . ?
C31A H31E 0.9600 . ?
C31A H31F 0.9600 . ?
C32A H32D 0.9600 . ?
C32A H32E 0.9600 . ?
C32A H32F 0.9600 . ?
N1B C11B 1.278(18) . ?
N1B N2B 1.390(17) . ?
N2B C12B 1.271(18) . ?
N3B C26B 1.281(19) . ?
N3B C25B 1.365(18) . ?
N4B C19B 1.286(19) . ?
N4B C20B 1.35(2) . ?
N5B C27B 1.31(3) . ?
N5B C29B 1.44(3) . ?
N5B C28B 1.45(3) . ?
N6B C30B 1.28(3) . ?
N6B C31B 1.42(3) . ?
N6B C32B 1.57(4) . ?
O1B C1B 1.280(19) . ?
O2B C27B 1.17(2) . ?
O3B C30B 1.23(2) . ?
C1B C10B 1.42(2) . ?
C1B C2B 1.44(2) . ?
C2B C3B 1.36(3) . ?
C2B H2B 0.9300 . ?
C3B C4B 1.43(3) . ?
C3B H3B 0.9300 . ?
C4B C9B 1.41(2) . ?
C4B C5B 1.46(2) . ?
C5B C6B 1.35(3) . ?
C5B H5B 0.9300 . ?
C6B C7B 1.34(3) . ?
C6B H6B 0.9300 . ?
C7B C8B 1.36(2) . ?
C7B H7B 0.9300 . ?
C8B C9B 1.41(2) . ?
C8B H8B 0.9300 . ?
C9B C10B 1.45(2) . ?
C10B C11B 1.40(2) . ?
C11B H11B 0.9300 . ?
C12B C13B 1.463(19) . ?
C12B C26B 1.477(19) . ?
C13B C14B 1.36(2) . ?
C13B C18B 1.42(2) . ?
C14B C15B 1.39(3) . ?
C14B H14B 0.9300 . ?
C15B C16B 1.45(3) . ?
C15B H15B 0.9300 . ?
C16B C17B 1.33(3) . ?
C16B H16B 0.9300 . ?
C17B C18B 1.39(2) . ?
C17B H17B 0.9300 . ?
C18B C19B 1.46(2) . ?
C19B C26B 1.419(19) . ?
C20B C21B 1.39(2) . ?
C20B C25B 1.45(2) . ?
C21B C22B 1.38(3) . ?
C21B H21B 0.9300 . ?
C22B C23B 1.38(3) . ?
C22B H22B 0.9300 . ?
C23B C24B 1.37(2) . ?
C23B H23B 0.9300 . ?
C24B C25B 1.39(2) . ?
C24B H24B 0.9300 . ?
C27B H27B 0.9300 . ?
C28B H28A 0.9600 . ?
C28B H28B 0.9600 . ?
C28B H28C 0.9600 . ?
C29B H29A 0.9600 . ?
C29B H29B 0.9600 . ?
C29B H29C 0.9600 . ?
C30B H30B 0.9300 . ?
C31B H31A 0.9600 . ?
C31B H31B 0.9600 . ?
C31B H31C 0.9600 . ?
C32B H32A 0.9600 . ?
C32B H32B 0.9600 . ?
C32B H32C 0.9600 . ?
Cl1 O1 1.36(3) . ?
Cl1 O3 1.36(3) . ?
Cl1 O2 1.40(5) . ?
Cl1 O4 1.55(3) . ?
Cl2 O6 1.19(6) 2_766 ?
Cl2 O6 1.19(6) . ?
Cl2 O7 1.40(6) 2_766 ?
Cl2 O7 1.40(6) . ?
Cl2 O5 1.58(4) . ?
Cl2 O5 1.58(4) 2_766 ?
Cl2 O8 1.70(10) 2_766 ?
Cl2 O8 1.70(10) . ?
O5 O6 1.48(7) 2_766 ?
O6 O7 1.25(7) 2_766 ?
O6 O8 1.60(10) 2_766 ?

loop_
_geom_angle_atom_site_label_1
_geom_angle_atom_site_label_2
_geom_angle_atom_site_label_3
_geom_angle
_geom_angle_site_symmetry_1
_geom_angle_site_symmetry_3
_geom_angle_publ_flag
O1A Cu1A N3A 173.8(5) . . ?
O1A Cu1A N1A 90.3(5) . . ?
N3A Cu1A N1A 95.6(5) . . ?
O1A Cu1A O2A 87.6(5) . . ?
N3A Cu1A O2A 89.2(5) . . ?
N1A Cu1A O2A 138.8(5) . . ?
O1A Cu1A O3A 88.0(5) . . ?
N3A Cu1A O3A 88.2(5) . . ?
N1A Cu1A O3A 108.9(5) . . ?
O2A Cu1A O3A 112.2(5) . . ?
O1B Cu1B N1B 91.2(4) . . ?
O1B Cu1B N3B 172.9(5) . . ?
N1B Cu1B N3B 95.6(5) . . ?
O1B Cu1B O2B 87.2(5) . . ?
N1B Cu1B O2B 136.8(5) . . ?
N3B Cu1B O2B 89.0(5) . . ?
O1B Cu1B O3B 88.3(5) . . ?
N1B Cu1B O3B 109.9(5) . . ?
N3B Cu1B O3B 87.7(5) . . ?
O2B Cu1B O3B 113.2(5) . . ?
C1A O1A Cu1A 131.8(10) . . ?
C27A O2A Cu1A 125.9(11) . . ?
C30A O3A Cu1A 123.9(14) . . ?
C11A N1A N2A 109.2(12) . . ?
C11A N1A Cu1A 124.3(10) . . ?
N2A N1A Cu1A 126.5(8) . . ?
C12A N2A N1A 118.7(12) . . ?
C26A N3A C25A 114.6(11) . . ?
C26A N3A Cu1A 118.5(9) . . ?
C25A N3A Cu1A 126.6(9) . . ?
C19A N4A C20A 115.6(11) . . ?
C27A N5A C28A 120.7(16) . . ?
C27A N5A C29A 119.9(19) . . ?
C28A N5A C29A 119.0(18) . . ?
C30A N6A C32A 122(2) . . ?
C30A N6A C31A 121(2) . . ?
C32A N6A C31A 117(2) . . ?
O1A C1A C10A 124.2(12) . . ?
O1A C1A C2A 116.1(14) . . ?
C10A C1A C2A 119.7(14) . . ?
C3A C2A C1A 120.6(15) . . ?
C3A C2A H2A 119.7 . . ?
C1A C2A H2A 119.7 . . ?
C2A C3A C4A 122.0(14) . . ?
C2A C3A H3A 119.0 . . ?
C4A C3A H3A 119.0 . . ?
C5A C4A C9A 117.9(17) . . ?
C5A C4A C3A 121.9(16) . . ?
C9A C4A C3A 120.2(14) . . ?
C6A C5A C4A 121.7(17) . . ?
C6A C5A H5A 119.2 . . ?
C4A C5A H5A 119.2 . . ?
C5A C6A C7A 119.8(16) . . ?
C5A C6A H6A 120.1 . . ?
C7A C6A H6A 120.1 . . ?
C8A C7A C6A 119.3(19) . . ?
C8A C7A H7A 120.3 . . ?
C6A C7A H7A 120.3 . . ?
C7A C8A C9A 122.1(16) . . ?
C7A C8A H8A 119.0 . . ?
C9A C8A H8A 119.0 . . ?
C8A C9A C4A 119.2(14) . . ?
C8A C9A C10A 125.0(13) . . ?
C4A C9A C10A 115.7(15) . . ?
C1A C10A C11A 121.1(13) . . ?
C1A C10A C9A 121.5(13) . . ?
C11A C10A C9A 117.3(14) . . ?
N1A C11A C10A 127.9(14) . . ?
N1A C11A H11A 116.1 . . ?
C10A C11A H11A 116.1 . . ?
N2A C12A C26A 131.4(13) . . ?
N2A C12A C13A 122.6(13) . . ?
C26A C12A C13A 106.0(12) . . ?
C18A C13A C14A 122.7(14) . . ?
C18A C13A C12A 109.1(14) . . ?
C14A C13A C12A 128.1(15) . . ?
C15A C14A C13A 117.7(16) . . ?
C15A C14A H14A 121.1 . . ?
C13A C14A H14A 121.1 . . ?
C14A C15A C16A 120.5(17) . . ?
C14A C15A H15A 119.7 . . ?
C16A C15A H15A 119.7 . . ?
C15A C16A C17A 123.2(15) . . ?
C15A C16A H16A 118.4 . . ?
C17A C16A H16A 118.4 . . ?
C18A C17A C16A 113.2(15) . . ?
C18A C17A H17A 123.4 . . ?
C16A C17A H17A 123.4 . . ?
C13A C18A C17A 122.6(15) . . ?
C13A C18A C19A 109.9(11) . . ?
C17A C18A C19A 127.4(13) . . ?
N4A C19A C26A 122.8(12) . . ?
N4A C19A C18A 130.0(12) . . ?
C26A C19A C18A 107.2(12) . . ?
N4A C20A C25A 122.3(12) . . ?
N4A C20A C21A 118.0(13) . . ?
C25A C20A C21A 119.7(13) . . ?
C22A C21A C20A 120.3(15) . . ?
C22A C21A H21A 119.9 . . ?
C20A C21A H21A 119.9 . . ?
C21A C22A C23A 120.6(15) . . ?
C21A C22A H22A 119.7 . . ?
C23A C22A H22A 119.7 . . ?
C24A C23A C22A 120.5(15) . . ?
C24A C23A H23A 119.8 . . ?
C22A C23A H23A 119.8 . . ?
C23A C24A C25A 119.5(14) . . ?
C23A C24A H24A 120.2 . . ?
C25A C24A H24A 120.2 . . ?
C20A C25A N3A 120.6(11) . . ?
C20A C25A C24A 119.3(13) . . ?
N3A C25A C24A 120.0(12) . . ?
N3A C26A C19A 124.0(13) . . ?
N3A C26A C12A 128.4(12) . . ?
C19A C26A C12A 107.5(12) . . ?
O2A C27A N5A 124.5(17) . . ?
O2A C27A H27A 117.8 . . ?
N5A C27A H27A 117.8 . . ?
N5A C28A H28D 109.5 . . ?
N5A C28A H28E 109.5 . . ?
H28D C28A H28E 109.5 . . ?
N5A C28A H28F 109.5 . . ?
H28D C28A H28F 109.5 . . ?
H28E C28A H28F 109.5 . . ?
N5A C29A H29D 109.5 . . ?
N5A C29A H29E 109.5 . . ?
H29D C29A H29E 109.5 . . ?
N5A C29A H29F 109.5 . . ?
H29D C29A H29F 109.5 . . ?
H29E C29A H29F 109.5 . . ?
O3A C30A N6A 126(2) . . ?
O3A C30A H30A 117.1 . . ?
N6A C30A H30A 117.1 . . ?
N6A C31A H31D 109.5 . . ?
N6A C31A H31E 109.5 . . ?
H31D C31A H31E 109.5 . . ?
N6A C31A H31F 109.5 . . ?
H31D C31A H31F 109.5 . . ?
H31E C31A H31F 109.5 . . ?
N6A C32A H32D 109.5 . . ?
N6A C32A H32E 109.5 . . ?
H32D C32A H32E 109.5 . . ?
N6A C32A H32F 109.5 . . ?
H32D C32A H32F 109.5 . . ?
H32E C32A H32F 109.5 . . ?
C11B N1B N2B 111.1(11) . . ?
C11B N1B Cu1B 122.6(10) . . ?
N2B N1B Cu1B 126.3(8) . . ?
C12B N2B N1B 119.0(12) . . ?
C26B N3B C25B 117.4(12) . . ?
C26B N3B Cu1B 117.3(9) . . ?
C25B N3B Cu1B 125.2(10) . . ?
C19B N4B C20B 115.1(12) . . ?
C27B N5B C29B 123(2) . . ?
C27B N5B C28B 120(2) . . ?
C29B N5B C28B 117(2) . . ?
C30B N6B C31B 124(2) . . ?
C30B N6B C32B 115(2) . . ?
C31B N6B C32B 121(2) . . ?
C1B O1B Cu1B 131.4(10) . . ?
C27B O2B Cu1B 126.8(14) . . ?
C30B O3B Cu1B 126.4(14) . . ?
O1B C1B C10B 123.4(14) . . ?
O1B C1B C2B 116.8(15) . . ?
C10B C1B C2B 119.7(15) . . ?
C3B C2B C1B 122.1(17) . . ?
C3B C2B H2B 119.0 . . ?
C1B C2B H2B 119.0 . . ?
C2B C3B C4B 119.0(15) . . ?
C2B C3B H3B 120.5 . . ?
C4B C3B H3B 120.5 . . ?
C9B C4B C3B 121.6(14) . . ?
C9B C4B C5B 117.9(16) . . ?
C3B C4B C5B 120.5(16) . . ?
C6B C5B C4B 120.4(16) . . ?
C6B C5B H5B 119.8 . . ?
C4B C5B H5B 119.8 . . ?
C5B C6B C7B 120.3(15) . . ?
C5B C6B H6B 119.9 . . ?
C7B C6B H6B 119.9 . . ?
C6B C7B C8B 123.1(19) . . ?
C6B C7B H7B 118.4 . . ?
C8B C7B H7B 118.4 . . ?
C7B C8B C9B 119.7(18) . . ?
C7B C8B H8B 120.1 . . ?
C9B C8B H8B 120.1 . . ?
C4B C9B C8B 118.5(14) . . ?
C4B C9B C10B 119.1(15) . . ?
C8B C9B C10B 122.4(14) . . ?
C11B C10B C1B 120.3(13) . . ?
C11B C10B C9B 121.1(14) . . ?
C1B C10B C9B 118.5(14) . . ?
N1B C11B C10B 130.9(14) . . ?
N1B C11B H11B 114.5 . . ?
C10B C11B H11B 114.5 . . ?
N2B C12B C13B 122.0(13) . . ?
N2B C12B C26B 132.2(13) . . ?
C13B C12B C26B 105.8(12) . . ?
C14B C13B C18B 120.7(14) . . ?
C14B C13B C12B 129.7(14) . . ?
C18B C13B C12B 109.6(13) . . ?
C13B C14B C15B 119.2(17) . . ?
C13B C14B H14B 120.4 . . ?
C15B C14B H14B 120.4 . . ?
C14B C15B C16B 119.0(18) . . ?
C14B C15B H15B 120.5 . . ?
C16B C15B H15B 120.5 . . ?
C17B C16B C15B 121.5(16) . . ?
C17B C16B H16B 119.3 . . ?
C15B C16B H16B 119.3 . . ?
C16B C17B C18B 119.4(17) . . ?
C16B C17B H17B 120.3 . . ?
C18B C17B H17B 120.3 . . ?
C17B C18B C13B 120.2(15) . . ?
C17B C18B C19B 132.4(15) . . ?
C13B C18B C19B 107.3(12) . . ?
N4B C19B C26B 124.3(13) . . ?
N4B C19B C18B 126.8(13) . . ?
C26B C19B C18B 108.8(12) . . ?
N4B C20B C21B 118.6(14) . . ?
N4B C20B C25B 121.9(13) . . ?
C21B C20B C25B 119.5(14) . . ?
C22B C21B C20B 120.3(15) . . ?
C22B C21B H21B 119.9 . . ?
C20B C21B H21B 119.9 . . ?
C21B C22B C23B 120.3(15) . . ?
C21B C22B H22B 119.9 . . ?
C23B C22B H22B 119.9 . . ?
C24B C23B C22B 121.0(17) . . ?
C24B C23B H23B 119.5 . . ?
C22B C23B H23B 119.5 . . ?
C23B C24B C25B 121.2(15) . . ?
C23B C24B H24B 119.4 . . ?
C25B C24B H24B 119.4 . . ?
N3B C25B C24B 123.4(14) . . ?
N3B C25B C20B 118.9(13) . . ?
C24B C25B C20B 117.6(13) . . ?
N3B C26B C19B 122.3(12) . . ?
N3B C26B C12B 129.2(12) . . ?
C19B C26B C12B 108.4(12) . . ?
O2B C27B N5B 126(2) . . ?
O2B C27B H27B 117.0 . . ?
N5B C27B H27B 117.0 . . ?
N5B C28B H28A 109.5 . . ?
N5B C28B H28B 109.5 . . ?
H28A C28B H28B 109.5 . . ?
N5B C28B H28C 109.5 . . ?
H28A C28B H28C 109.5 . . ?
H28B C28B H28C 109.5 . . ?
N5B C29B H29A 109.5 . . ?
N5B C29B H29B 109.5 . . ?
H29A C29B H29B 109.5 . . ?
N5B C29B H29C 109.5 . . ?
H29A C29B H29C 109.5 . . ?
H29B C29B H29C 109.5 . . ?
O3B C30B N6B 128(2) . . ?
O3B C30B H30B 116.0 . . ?
N6B C30B H30B 116.0 . . ?
N6B C31B H31A 109.5 . . ?
N6B C31B H31B 109.5 . . ?
H31A C31B H31B 109.5 . . ?
N6B C31B H31C 109.5 . . ?
H31A C31B H31C 109.5 . . ?
H31B C31B H31C 109.5 . . ?
N6B C32B H32A 109.5 . . ?
N6B C32B H32B 109.5 . . ?
H32A C32B H32B 109.5 . . ?
N6B C32B H32C 109.5 . . ?
H32A C32B H32C 109.5 . . ?
H32B C32B H32C 109.5 . . ?
O1 Cl1 O3 116(3) . . ?
O1 Cl1 O2 112(3) . . ?
O3 Cl1 O2 106(2) . . ?
O1 Cl1 O4 105(2) . . ?
O3 Cl1 O4 103(2) . . ?
O2 Cl1 O4 114(2) . . ?
O6 Cl2 O6 180.0 2_766 . ?
O6 Cl2 O7 123(3) 2_766 2_766 ?
O6 Cl2 O7 57(3) . 2_766 ?
O6 Cl2 O7 57(3) 2_766 . ?
O6 Cl2 O7 123(3) . . ?
O7 Cl2 O7 180.00(2) 2_766 . ?
O6 Cl2 O5 63(3) 2_766 . ?
O6 Cl2 O5 117(3) . . ?
O7 Cl2 O5 88(3) 2_766 . ?
O7 Cl2 O5 92(3) . . ?
O6 Cl2 O5 117(3) 2_766 2_766 ?
O6 Cl2 O5 63(3) . 2_766 ?
O7 Cl2 O5 92(3) 2_766 2_766 ?
O7 Cl2 O5 88(3) . 2_766 ?
O5 Cl2 O5 180.0 . 2_766 ?
O6 Cl2 O8 116(4) 2_766 2_766 ?
O6 Cl2 O8 64(4) . 2_766 ?
O7 Cl2 O8 104(3) 2_766 2_766 ?
O7 Cl2 O8 76(3) . 2_766 ?
O5 Cl2 O8 79(3) . 2_766 ?
O5 Cl2 O8 101(3) 2_766 2_766 ?
O6 Cl2 O8 64(4) 2_766 . ?
O6 Cl2 O8 116(4) . . ?
O7 Cl2 O8 76(3) 2_766 . ?
O7 Cl2 O8 104(3) . . ?
O5 Cl2 O8 101(3) . . ?
O5 Cl2 O8 79(3) 2_766 . ?
O8 Cl2 O8 179.998(16) 2_766 . ?
O6 O5 Cl2 46(2) 2_766 . ?
Cl2 O6 O7 70(4) . 2_766 ?
Cl2 O6 O5 72(3) . 2_766 ?
O7 O6 O5 104(5) 2_766 2_766 ?
Cl2 O6 O8 73(5) . 2_766 ?
O7 O6 O8 117(6) 2_766 2_766 ?
O5 O6 O8 110(5) 2_766 2_766 ?
O6 O7 Cl2 53(4) 2_766 . ?
O6 O8 Cl2 42(3) 2_766 . ?

_refine_diff_density_max         3.321
_refine_diff_density_min         -1.031
_refine_diff_density_rms         0.209

_shelx_res_file                  
;
TITL SS8_0m in P-1
    shelx.res
    created by SHELXL-2016/6 at 09:42:10 on 08-Jan-2021
CELL  0.71073  14.0666  15.5866  15.6008  106.091   91.734  100.266
ZERR     4.00   0.0035   0.0039   0.0038    0.007    0.007    0.008
LATT   1
SFAC  C    H    N    O    CL   CU
UNIT  128 120 24 26 3 4
MERG   2
OMIT    -3.00  50.00
TWIN   -1.00  0.00  0.00  0.41  1.00  0.56  0.00  0.00 -1.00   2
isor 0.005 c1b  o2
FMAP   2
PLAN   30
ACTA
BOND   $H
L.S.   24
TEMP    23.00
WGHT    0.200000
BASF   0.19737
FVAR       0.07174
CU1A  6    0.067159    0.863509    0.522385    11.00000    0.05270    0.04034 =
         0.02501    0.00692   -0.00051    0.01018
CU1B  6    0.433349    0.147210    0.100415    11.00000    0.05464    0.04340 =
         0.03213    0.01379    0.00740    0.00762
O1A   4    0.019440    0.807462    0.401703    11.00000    0.06154    0.05511 =
         0.02963    0.00224    0.00113    0.01492
O2A   4   -0.058759    0.796764    0.557667    11.00000    0.04641    0.04208 =
         0.03290    0.00834   -0.00304    0.00811
O3A   4    0.180482    0.779455    0.499749    11.00000    0.07381    0.06117 =
         0.04638   -0.00588    0.01059    0.02451
N1A   3    0.116147    0.979867    0.494114    11.00000    0.03808    0.04745 =
         0.02506    0.00872    0.00471    0.01553
N2A   3    0.161507    1.061574    0.554363    11.00000    0.03846    0.03834 =
         0.02424    0.00836    0.00416    0.01017
N3A   3    0.116269    0.908863    0.650426    11.00000    0.03607    0.04195 =
         0.02689    0.01306    0.00099    0.01292
N4A   3    0.172358    0.994034    0.837191    11.00000    0.03640    0.04603 =
         0.02273    0.00592    0.00102    0.01091
N5A   3   -0.180838    0.678608    0.536274    11.00000    0.03921    0.04848 =
         0.07200    0.01269   -0.00306    0.00873
N6A   3    0.239626    0.665108    0.415078    11.00000    0.08387    0.06665 =
         0.05143    0.01205    0.02159    0.05058
C1A   1    0.028446    0.835148    0.331605    11.00000    0.02616    0.05717 =
         0.02675    0.00643   -0.00263    0.01123
C2A   1   -0.006602    0.769578    0.249115    11.00000    0.06401    0.04188 =
         0.03342    0.00304   -0.00768    0.02753
AFIX  43
H2A   2   -0.035305    0.710765    0.248310    11.00000   -1.20000
AFIX   0
C3A   1    0.001219    0.791557    0.171597    11.00000    0.04830    0.06715 =
         0.03073   -0.00445   -0.00017    0.00714
AFIX  43
H3A   2   -0.019281    0.746491    0.117922    11.00000   -1.20000
AFIX   0
C4A   1    0.040264    0.882494    0.169408    11.00000    0.05480    0.07942 =
         0.02734    0.01604    0.00521    0.02638
C5A   1    0.047670    0.905604    0.088372    11.00000    0.05459    0.09053 =
         0.03817    0.01674    0.00533    0.02769
AFIX  43
H5A   2    0.023765    0.861476    0.034884    11.00000   -1.20000
AFIX   0
C6A   1    0.089113    0.991264    0.086380    11.00000    0.07822    0.10579 =
         0.03429    0.03241    0.01109    0.03973
AFIX  43
H6A   2    0.094826    1.004431    0.031936    11.00000   -1.20000
AFIX   0
C7A   1    0.123172    1.059596    0.167185    11.00000    0.07109    0.07543 =
         0.05379    0.03315    0.01020    0.02837
AFIX  43
H7A   2    0.152244    1.117809    0.166395    11.00000   -1.20000
AFIX   0
C8A   1    0.112959    1.039274    0.246949    11.00000    0.07161    0.06605 =
         0.02870    0.01671    0.00308    0.03462
AFIX  43
H8A   2    0.132234    1.085387    0.300134    11.00000   -1.20000
AFIX   0
C9A   1    0.074961    0.952510    0.250740    11.00000    0.03305    0.06433 =
         0.02483    0.00181    0.00681    0.02441
C10A  1    0.071953    0.923514    0.332793    11.00000    0.03404    0.06023 =
         0.02938    0.01723    0.01276    0.01414
C11A  1    0.109059    0.990494    0.414409    11.00000    0.04204    0.04629 =
         0.02121    0.00498    0.01307    0.01694
AFIX  43
H11A  2    0.130988    1.049111    0.410528    11.00000   -1.20000
AFIX   0
C12A  1    0.173846    1.065454    0.637554    11.00000    0.03470    0.04019 =
         0.03345    0.00496    0.00987    0.01214
C13A  1    0.216662    1.150910    0.707542    11.00000    0.04847    0.04668 =
         0.03719    0.00032    0.00482    0.02877
C14A  1    0.248781    1.235649    0.697237    11.00000    0.05323    0.05456 =
         0.04740    0.01364    0.00790    0.01497
AFIX  43
H14A  2    0.247743    1.245056    0.640925    11.00000   -1.20000
AFIX   0
C15A  1    0.282424    1.305909    0.772745    11.00000    0.06430    0.04157 =
         0.05888    0.00639   -0.00916   -0.00406
AFIX  43
H15A  2    0.305962    1.363863    0.767819    11.00000   -1.20000
AFIX   0
C16A  1    0.281649    1.291340    0.856011    11.00000    0.06889    0.05863 =
         0.06140   -0.00610   -0.01238    0.00744
AFIX  43
H16A  2    0.304582    1.340526    0.905982    11.00000   -1.20000
AFIX   0
C17A  1    0.247046    1.203645    0.869323    11.00000    0.04750    0.04727 =
         0.03644   -0.00027    0.00340    0.00703
AFIX  43
H17A  2    0.246430    1.193619    0.925375    11.00000   -1.20000
AFIX   0
C18A  1    0.214451    1.135054    0.789460    11.00000    0.03667    0.04524 =
         0.02573   -0.00149   -0.00045    0.02095
C19A  1    0.178884    1.038316    0.778543    11.00000    0.04244    0.03697 =
         0.02121    0.00061    0.00950    0.01246
C20A  1    0.139081    0.900737    0.803956    11.00000    0.02741    0.04740 =
         0.02631    0.01314    0.00328    0.01225
C21A  1    0.135025    0.847867    0.865187    11.00000    0.06525    0.07306 =
         0.03191    0.02476    0.01276    0.01103
AFIX  43
H21A  2    0.156352    0.875772    0.925137    11.00000   -1.20000
AFIX   0
C22A  1    0.100343    0.757280    0.836722    11.00000    0.05108    0.05912 =
         0.05120    0.03215    0.00435    0.00994
AFIX  43
H22A  2    0.094634    0.723727    0.877813    11.00000   -1.20000
AFIX   0
C23A  1    0.072637    0.712983    0.745047    11.00000    0.06367    0.05057 =
         0.05043    0.02342    0.00186    0.00713
AFIX  43
H23A  2    0.049998    0.650367    0.726139    11.00000   -1.20000
AFIX   0
C24A  1    0.078935    0.762029    0.683286    11.00000    0.05805    0.03701 =
         0.03391    0.00635   -0.00456    0.00841
AFIX  43
H24A  2    0.062269    0.732424    0.622804    11.00000   -1.20000
AFIX   0
C25A  1    0.110985    0.857796    0.712789    11.00000    0.04014    0.03690 =
         0.02867    0.00542    0.01077    0.00632
C26A  1    0.150205    0.995297    0.684498    11.00000    0.03726    0.04585 =
         0.02793    0.00867    0.00516    0.02894
C27A  1   -0.114643    0.731026    0.508702    11.00000    0.04065    0.05230 =
         0.05032    0.00433   -0.00558    0.01721
AFIX  43
H27A  2   -0.109108    0.717855    0.447376    11.00000   -1.20000
AFIX   0
C28A  1   -0.187989    0.690194    0.631275    11.00000    0.05875    0.07730 =
         0.08859    0.02350    0.01053    0.00258
AFIX  33
H28D  2   -0.240866    0.645745    0.639549    11.00000   -1.50000
H28E  2   -0.128686    0.682328    0.657475    11.00000   -1.50000
H28F  2   -0.199146    0.750174    0.659638    11.00000   -1.50000
AFIX   0
C29A  1   -0.242427    0.599827    0.471566    11.00000    0.07703    0.06645 =
         0.10148    0.00485   -0.02607   -0.00937
AFIX  33
H29D  2   -0.287535    0.568214    0.502720    11.00000   -1.50000
H29E  2   -0.277368    0.620280    0.429702    11.00000   -1.50000
H29F  2   -0.202624    0.559506    0.439992    11.00000   -1.50000
AFIX   0
C30A  1    0.170802    0.706546    0.444835    11.00000    0.07759    0.05954 =
         0.04783    0.01505    0.01370    0.01505
AFIX  43
H30A  2    0.107919    0.677449    0.421767    11.00000   -1.20000
AFIX   0
C31A  1    0.218205    0.573305    0.347623    11.00000    0.17017    0.07769 =
         0.06369    0.00578    0.01765    0.05662
AFIX 137
H31D  2    0.229700    0.528122    0.375716    11.00000   -1.50000
H31E  2    0.259529    0.573067    0.299733    11.00000   -1.50000
H31F  2    0.151639    0.559816    0.324133    11.00000   -1.50000
AFIX   0
C32A  1    0.338876    0.702332    0.445957    11.00000    0.05073    0.17804 =
         0.15442    0.00800    0.01801    0.03977
AFIX 137
H32D  2    0.345418    0.765209    0.479262    11.00000   -1.50000
H32E  2    0.377259    0.697518    0.395606    11.00000   -1.50000
H32F  2    0.360769    0.669329    0.483791    11.00000   -1.50000
AFIX   0
N1B   3    0.386980    0.029498    0.007075    11.00000    0.03438    0.04136 =
         0.02821    0.01524    0.00460    0.00286
N2B   3    0.345853   -0.052649    0.021733    11.00000    0.04395    0.05092 =
         0.02896    0.01319    0.00244    0.00721
N3B   3    0.388737    0.101298    0.205017    11.00000    0.03609    0.04560 =
         0.03214    0.01527   -0.00140    0.01025
N4B   3    0.332383    0.018754    0.340674    11.00000    0.04229    0.05670 =
         0.03130    0.02425    0.00644    0.02231
N5B   3    0.680473    0.335477    0.226326    11.00000    0.03205    0.07133 =
         0.09569   -0.00551    0.01133    0.00825
N6B   3    0.249562    0.346472    0.107496    11.00000    0.06948    0.07828 =
         0.05687    0.01853   -0.00733    0.03913
O1B   4    0.476601    0.204596    0.012808    11.00000    0.06451    0.04104 =
         0.03751    0.01809    0.01331    0.00613
O2B   4    0.562179    0.215358    0.176380    11.00000    0.05502    0.05452 =
         0.05099    0.01925    0.00955    0.00559
O3B   4    0.315655    0.228787    0.121655    11.00000    0.06267    0.06611 =
         0.06220    0.02521    0.00471    0.01946
C1B   1    0.470738    0.174876   -0.072714    11.00000    0.04907    0.05000 =
         0.04472    0.01677    0.00417    0.00735
C2B   1    0.506909    0.239359   -0.120123    11.00000    0.05840    0.05742 =
         0.06636    0.03217    0.01805    0.01298
AFIX  43
H2B   2    0.534117    0.298850   -0.087569    11.00000   -1.20000
AFIX   0
C3B   1    0.502586    0.216130   -0.210828    11.00000    0.04734    0.07416 =
         0.05514    0.03874    0.01522    0.01457
AFIX  43
H3B   2    0.524877    0.259434   -0.240020    11.00000   -1.20000
AFIX   0
C4B   1    0.463200    0.123962   -0.260946    11.00000    0.03971    0.07473 =
         0.04165    0.02516    0.01105    0.03137
C5B   1    0.455762    0.097045   -0.358385    11.00000    0.04695    0.09313 =
         0.03548    0.03843    0.01063    0.02023
AFIX  43
H5B   2    0.478407    0.139595   -0.388325    11.00000   -1.20000
AFIX   0
C6B   1    0.416324    0.010981   -0.405381    11.00000    0.05469    0.09750 =
         0.02795    0.02434    0.01781    0.02852
AFIX  43
H6B   2    0.410934   -0.005456   -0.467619    11.00000   -1.20000
AFIX   0
C7B   1    0.384739   -0.051230   -0.362814    11.00000    0.09885    0.07424 =
         0.02842    0.01304    0.01984    0.03293
AFIX  43
H7B   2    0.357534   -0.110150   -0.396969    11.00000   -1.20000
AFIX   0
C8B   1    0.390634   -0.032164   -0.271789    11.00000    0.07803    0.07002 =
         0.03443    0.01406    0.02666    0.03651
AFIX  43
H8B   2    0.369511   -0.077922   -0.245202    11.00000   -1.20000
AFIX   0
C9B   1    0.428834    0.057085   -0.218258    11.00000    0.04369    0.06651 =
         0.03694    0.02819    0.00772    0.03247
C10B  1    0.431785    0.082940   -0.121314    11.00000    0.03189    0.04876 =
         0.02844    0.01472    0.00321    0.01826
C11B  1    0.395827    0.019825   -0.076210    11.00000    0.03961    0.04778 =
         0.02923    0.01743    0.00728    0.01552
AFIX  43
H11B  2    0.374724   -0.039282   -0.112949    11.00000   -1.20000
AFIX   0
C12B  1    0.333466   -0.055049    0.101490    11.00000    0.03520    0.03623 =
         0.03678    0.01730    0.00402    0.00634
C13B  1    0.294358   -0.139766    0.122270    11.00000    0.04332    0.04334 =
         0.04405    0.02400    0.00506    0.01499
C14B  1    0.260799   -0.224746    0.066068    11.00000    0.04951    0.05929 =
         0.04687    0.01509    0.00851    0.00394
AFIX  43
H14B  2    0.260829   -0.235314    0.004400    11.00000   -1.20000
AFIX   0
C15B  1    0.226480   -0.295543    0.101995    11.00000    0.05943    0.04918 =
         0.09825    0.02619    0.00151   -0.00304
AFIX  43
H15B  2    0.205734   -0.354536    0.064881    11.00000   -1.20000
AFIX   0
C16B  1    0.223545   -0.275938    0.198275    11.00000    0.04994    0.07172 =
         0.09134    0.05630    0.01896    0.01030
AFIX  43
H16B  2    0.198944   -0.322751    0.222454    11.00000   -1.20000
AFIX   0
C17B  1    0.255147   -0.192785    0.252574    11.00000    0.05858    0.05645 =
         0.06767    0.03870    0.03351    0.02236
AFIX  43
H17B  2    0.252310   -0.181387    0.314104    11.00000   -1.20000
AFIX   0
C18B  1    0.292643   -0.122648    0.216581    11.00000    0.03649    0.05057 =
         0.03991    0.02467    0.01505    0.01517
C19B  1    0.328399   -0.025134    0.257215    11.00000    0.03650    0.05064 =
         0.03813    0.02557    0.00520    0.01786
C20B  1    0.366771    0.109534    0.360675    11.00000    0.03761    0.04575 =
         0.04473    0.01601    0.00473    0.01327
C21B  1    0.373680    0.161882    0.449761    11.00000    0.06811    0.07924 =
         0.02670    0.02296    0.01098    0.02945
AFIX  43
H21B  2    0.353167    0.134536    0.493699    11.00000   -1.20000
AFIX   0
C22B  1    0.410732    0.253868    0.472965    11.00000    0.06821    0.07763 =
         0.03085    0.00527    0.00342    0.03163
AFIX  43
H22B  2    0.418244    0.287896    0.532859    11.00000   -1.20000
AFIX   0
C23B  1    0.436816    0.295884    0.407686    11.00000    0.05127    0.05654 =
         0.04262   -0.00303    0.00486    0.01751
AFIX  43
H23B  2    0.460244    0.358365    0.424063    11.00000   -1.20000
AFIX   0
C24B  1    0.428687    0.246784    0.318873    11.00000    0.05006    0.04863 =
         0.03042    0.00586    0.00440    0.01635
AFIX  43
H24B  2    0.444441    0.276946    0.275949    11.00000   -1.20000
AFIX   0
C25B  1    0.397425    0.153114    0.292172    11.00000    0.02750    0.05850 =
         0.03242    0.00993    0.00371    0.01805
C26B  1    0.355133    0.015848    0.188565    11.00000    0.03881    0.04530 =
         0.02532    0.01340    0.00814    0.01707
C27B  1    0.615187    0.278271    0.166376    11.00000    0.05058    0.07002 =
         0.05808    0.00903    0.02758    0.00771
AFIX  43
H27B  2    0.610331    0.288430    0.110552    11.00000   -1.20000
AFIX   0
C28B  1    0.690044    0.325477    0.315624    11.00000    0.07578    0.11658 =
         0.08479    0.00052   -0.01664   -0.00241
AFIX  33
H28A  2    0.740913    0.372608    0.351133    11.00000   -1.50000
H28B  2    0.630094    0.330094    0.342738    11.00000   -1.50000
H28C  2    0.705467    0.267105    0.312163    11.00000   -1.50000
AFIX   0
C29B  1    0.736623    0.416736    0.212335    11.00000    0.08705    0.06003 =
         0.16599    0.03290    0.00660   -0.00937
AFIX  33
H29A  2    0.780130    0.448909    0.264454    11.00000   -1.50000
H29B  2    0.773248    0.400313    0.161392    11.00000   -1.50000
H29C  2    0.693841    0.455041    0.201853    11.00000   -1.50000
AFIX   0
C30B  1    0.319617    0.304524    0.111243    11.00000    0.06553    0.06395 =
         0.04888    0.01570   -0.00574    0.00354
AFIX  43
H30B  2    0.380934    0.335349    0.105337    11.00000   -1.20000
AFIX   0
C31B  1    0.261523    0.435984    0.099296    11.00000    0.14186    0.07013 =
         0.10471    0.00971    0.00476    0.06260
AFIX 137
H31A  2    0.329401    0.461663    0.103501    11.00000   -1.50000
H31B  2    0.231352    0.472772    0.146435    11.00000   -1.50000
H31C  2    0.231919    0.434163    0.042398    11.00000   -1.50000
AFIX   0
C32B  1    0.145753    0.288534    0.106658    11.00000    0.08276    0.23539 =
         0.15269    0.12043    0.06038    0.06813
AFIX 137
H32A  2    0.150259    0.242845    0.136287    11.00000   -1.50000
H32B  2    0.119312    0.259765    0.045895    11.00000   -1.50000
H32C  2    0.104281    0.327603    0.137281    11.00000   -1.50000
AFIX   0
O1W   4    0.977849    0.493037    0.092173    11.00000    0.05484    0.07389 =
         0.14167    0.05741   -0.03303   -0.01966
CL1   5    0.489326    0.512850    0.294668    11.00000    0.07410    0.06642 =
         0.11018    0.00440   -0.00011    0.02320
O1    4    0.473031    0.593787    0.287492    11.00000    0.31107    0.10740 =
         0.58789    0.16653    0.31664    0.13528
O2    4    0.557068    0.523087    0.366069    11.00000    0.23839    0.24681 =
         0.23750    0.06501    0.01011    0.04055
O3    4    0.521588    0.458836    0.221472    11.00000    0.18777    0.31886 =
         0.23235   -0.10201    0.01891    0.17134
O4    4    0.387581    0.458133    0.301300    11.00000    0.17166    0.16066 =
         0.12646    0.04076    0.01744    0.00611
CL2   5    1.000000    0.500000    0.500000    10.50000    0.12873    0.05493 =
         0.28572    0.01893    0.12674    0.03030
O5    4    1.101817    0.560973    0.542835    10.50000    0.10492
O6    4    0.992679    0.419560    0.483015    10.50000    0.14521
O7    4    0.950331    0.550164    0.566422    10.50000    0.14048
O8    4    0.981708    0.540013    0.410841    10.50000    0.23493
HKLF    4


REM  SS8_0m in P-1
REM R1 =  0.1842 for    7896 Fo > 4sig(Fo)  and  0.2217 for all   11126 data
REM    838 parameters refined using     12 restraints

END

WGHT      0.2000      0.0000

REM Highest difference peak  3.321,  deepest hole -1.031,  1-sigma level  0.209
Q1    1  -0.0256  0.8562  0.4712  11.00000  0.05    3.32
Q2    1   0.3386  0.1380  0.0478  11.00000  0.05    3.02
Q3    1   0.1606 -0.1390  0.3296  11.00000  0.05    2.70
Q4    1   0.5267  0.1450 -0.0931  11.00000  0.05    2.70
Q5    1   0.0440  0.8470  0.4991  11.00000  0.05    1.17
Q6    1   0.4140  0.1427  0.5317  11.00000  0.05    1.16
Q7    1   0.9290  0.4205  0.0738  11.00000  0.05    1.13
Q8    1   0.1800  0.8591  0.8913  11.00000  0.05    1.11
Q9    1   0.3848  0.4776  0.0713  11.00000  0.05    1.08
Q10   1   0.5000  0.5000  0.0000  10.50000  0.05    1.07
Q11   1   0.9915  0.5139  0.1668  11.00000  0.05    1.04
Q12   1   0.9533  0.4020  0.0472  11.00000  0.05    1.04
Q13   1   0.8219  0.5784  0.3175  11.00000  0.05    1.03
Q14   1   0.3120  0.1456  0.4853  11.00000  0.05    1.02
Q15   1   0.9195  0.4879  0.2777  11.00000  0.05    0.96
Q16   1   0.0858  0.8572  0.0893  11.00000  0.05    0.95
Q17   1   0.9257  0.5185  0.1290  11.00000  0.05    0.86
Q18   1   1.0961  0.4967  0.1268  11.00000  0.05    0.86
Q19   1   0.6821  0.4203  0.0625  11.00000  0.05    0.85
Q20   1   0.9368  0.5055  0.1087  11.00000  0.05    0.81
Q21   1   0.2092  1.1410  0.6813  11.00000  0.05    0.81
Q22   1   0.4090  0.1377  0.0916  11.00000  0.05    0.80
Q23   1   0.5701  0.5704  0.3267  11.00000  0.05    0.77
Q24   1   0.0919  0.8037  0.4201  11.00000  0.05    0.76
Q25   1   0.7733  0.4292  0.1098  11.00000  0.05    0.75
Q26   1   0.8935  0.5391  0.0782  11.00000  0.05    0.74
Q27   1  -0.0494  0.7023  0.2242  11.00000  0.05    0.74
Q28   1   0.9044  0.5648  0.3626  11.00000  0.05    0.73
Q29   1   0.3920  0.0481 -0.1137  11.00000  0.05    0.70
Q30   1   0.0213  0.8755  0.3497  11.00000  0.05    0.68
;
_shelx_res_checksum              23861

_shelx_hkl_file                  
;
   1   0   0    0.14    0.02
   2   0   0  114.01    9.53
   3   0   0    1.02    0.13
   4   0   0    3.25    0.32
   5   0   0    0.14    0.08
   5   0   0    0.29    0.18
   6   0   0   10.73    0.94
   6   0   0   10.87    1.27
   7   0   0    0.06    0.12
   7   0   0    0.44    0.27
   8   0   0    3.99    0.44
   8   0   0    4.40    0.72
   9   0   0    0.02    0.14
   9   0   0   -0.14    0.31
  10   0   0    2.47    0.50
  10   0   0    2.28    0.30
  11   0   0    0.01    0.18
  11   0   0   -0.58    0.39
  12   0   0    3.52    0.66
  12   0   0    2.50    0.37
  13   0   0   -0.21    0.47
  13   0   0    0.16    0.20
  14   0   0    0.07    0.20
  14   0   0   -0.01    0.51
  15   0   0   -0.81    0.54
  15   0   0   -0.18    0.20
  16   0   0    1.55    0.32
  16   0   0    1.10    0.64
  17   0   0    0.03    0.23
  17   0   0   -0.44    0.62
  17  -1   0   -0.64    0.63
  17  -1   0   -0.08    0.24
  16  -1   0   -0.16    0.22
  16  -1   0   -0.35    0.58
  15  -1   0   -0.29    0.55
  15  -1   0   -0.33    0.21
  14  -1   0   -0.14    0.51
  14  -1   0    0.55    0.24
  13  -1   0    0.05    0.48
  13  -1   0   -0.07    0.20
  12  -1   0   19.93    1.56
  12  -1   0   15.28    2.09
  11  -1   0    0.06    0.18
  11  -1   0   -0.18    0.39
  10  -1   0    0.49    0.17
  10  -1   0    0.35    0.35
   9  -1   0   -0.01    0.14
   9  -1   0   -0.34    0.30
   8  -1   0    2.54    0.32
   7  -1   0   -0.04    0.11
   7  -1   0   -0.20    0.23
   6  -1   0   36.92    3.18
   6  -1   0   38.58    4.20
   5  -1   0    2.28    0.32
   5  -1   0    2.38    0.25
   4  -1   0  757.58   86.85
   4  -1   0  817.89   65.83
   3  -1   0    0.01    0.04
   2  -1   0  106.94    8.93
   1  -1   0    0.52    0.05
  -1   1   0    0.44    0.05
   0   1   0  309.84   23.09
   0   1   0  306.48   25.74
   1   1   0    0.27    0.04
   2   1   0   70.14    5.86
   3   1   0    0.11    0.12
   3   1   0    0.08    0.05
   4   1   0   28.83    2.97
   4   1   0   24.53    2.24
   5   1   0    2.74    0.27
   5   1   0    2.29    0.35
   6   1   0    0.14    0.23
   6   1   0   -0.06    0.10
   7   1   0    0.90    0.30
   8   1   0   46.28    5.09
   8   1   0   44.77    3.84
   9   1   0    0.15    0.31
   9   1   0   -0.07    0.13
  10   1   0    6.92    0.98
  10   1   0    6.65    0.65
  11   1   0    0.28    0.18
  11   1   0   -0.05    0.40
  12   1   0    5.63    0.60
  12   1   0    5.93    0.94
  13   1   0    0.00    0.47
  13   1   0    0.04    0.19
  14   1   0   -0.11    0.51
  14   1   0   -0.17    0.19
  15   1   0   -0.38    0.54
  15   1   0    0.14    0.22
  16   1   0    0.46    0.24
  16   1   0    0.58    0.62
  17   1   0    0.14    0.66
  17  -2   0   -1.18    0.61
  17  -2   0   -0.16    0.25
  16  -2   0   -0.18    0.61
  16  -2   0    0.35    0.26
  15  -2   0   -0.91    0.54
  15  -2   0   -0.01    0.23
  14  -2   0   -0.23    0.51
  14  -2   0    0.36    0.24
  13  -2   0   -0.08    0.22
  13  -2   0   -0.19    0.48
  12  -2   0    4.79    0.53
  11  -2   0   -0.11    0.16
  11  -2   0   -0.28    0.37
  10  -2   0    6.03    0.96
  10  -2   0    7.58    0.67
   9  -2   0   -0.17    0.30
   9  -2   0    0.47    0.17
   8  -2   0    1.63    0.35
   7  -2   0    0.35    0.23
   7  -2   0    0.34    0.12
   6  -2   0    2.15    0.26
   5  -2   0    0.09    0.07
   5  -2   0    0.20    0.15
   4  -2   0  391.13   43.14
   4  -2   0  391.79   32.71
   3  -2   0    0.87    0.12
   1  -2   0    1.03    0.10
  -1   2   0    1.05    0.10
   0   2   0   12.03    0.98
   0   2   0   11.22    0.88
   1   2   0    0.44    0.06
   2   2   0  241.95   20.22
   3   2   0    0.17    0.13
   3   2   0    0.19    0.04
   4   2   0   22.20    2.42
   4   2   0   21.14    1.83
   5   2   0    1.37    0.17
   5   2   0    1.29    0.27
   6   2   0   13.96    1.21
   6   2   0   13.98    1.62
   7   2   0    1.20    0.31
   7   2   0    1.08    0.17
   8   2   0   38.54    3.71
   8   2   0   27.80    2.79
   9   2   0    0.53    0.16
   9   2   0    0.31    0.32
  10   2   0    2.67    0.35
  10   2   0    2.57    0.52
  11   2   0    0.25    0.41
  11   2   0    0.25    0.18
  12   2   0    1.60    0.26
  12   2   0    1.42    0.49
  13   2   0   -0.49    0.46
  13   2   0    0.51    0.21
  14   2   0    1.79    0.31
  14   2   0    1.18    0.59
  15   2   0    0.22    0.57
  15   2   0    0.19    0.22
  16   2   0   -0.07    0.62
  16   2   0    0.23    0.23
  17  -3   0   -0.85    0.62
  16  -3   0   -0.64    0.59
  16  -3   0   -0.03    0.26
  15  -3   0   -0.75    0.53
  15  -3   0   -0.18    0.24
  14  -3   0   -0.59    0.50
  14  -3   0    0.05    0.20
  13  -3   0   -0.34    0.46
  13  -3   0    0.05    0.22
  12  -3   0    3.47    0.43
  12  -3   0    3.14    0.63
  11  -3   0   -0.09    0.17
  11  -3   0   -0.52    0.35
  10  -3   0    0.33    0.17
  10  -3   0   -0.06    0.32
   9  -3   0    0.38    0.15
   9  -3   0    0.17    0.29
   8  -3   0    1.14    0.21
   8  -3   0    2.04    0.33
   7  -3   0    1.38    0.20
   7  -3   0    1.90    0.32
   6  -3   0   20.45    2.28
   6  -3   0   19.99    1.72
   5  -3   0    2.26    0.29
   5  -3   0    1.92    0.23
   4  -3   0  459.79   49.40
   4  -3   0  458.73   37.43
  -4   3   0  425.40   33.57
   3  -3   0    0.68    0.13
   3  -3   0    0.49    0.08
  -3   3   0    0.68    0.08
  -1   3   0    0.36    0.06
  -1   3   0    0.60    0.06
   0   3   0  105.45    7.98
   0   3   0  107.52    8.90
   1   3   0    0.05    0.04
   1   3   0    0.03    0.04
   2   3   0  203.19   21.40
   2   3   0  200.52   16.37
   2   3   0  169.04   16.22
   2   3   0  203.75   14.55
   3   3   0    2.69    0.27
   3   3   0    3.39    0.28
   3   3   0    2.94    0.24
   4   3   0    4.02    0.37
   5   3   0    0.01    0.08
   5   3   0    0.17    0.09
   5   3   0    0.07    0.07
   5   3   0    0.17    0.21
   6   3   0    2.18    0.25
   6   3   0    1.91    0.27
   6   3   0    2.96    0.39
   7   3   0    0.35    0.26
   7   3   0    0.07    0.05
   7   3   0    0.02    0.11
   8   3   0    0.25    0.29
   8   3   0    0.45    0.13
   9   3   0    0.22    0.32
   9   3   0    0.32    0.15
  10   3   0    4.88    0.46
  10   3   0    3.06    0.62
  11   3   0   -0.30    0.40
  11   3   0   -0.04    0.17
  12   3   0    0.20    0.45
  12   3   0    0.70    0.21
  13   3   0    0.10    0.20
  13   3   0   -0.29    0.49
  14   3   0    5.37    0.56
  14   3   0    4.12    0.84
  15   3   0   -0.46    0.57
  15   3   0    0.19    0.23
  16   3   0    0.23    0.25
  16   3   0    0.18    0.66
  17  -4   0   -0.84    0.64
  16  -4   0    0.33    0.26
  16  -4   0   -1.09    0.59
  15  -4   0   -0.75    0.54
  15  -4   0    0.26    0.23
  14  -4   0    0.72    0.24
  14  -4   0   -0.27    0.50
  13  -4   0   -0.50    0.45
  13  -4   0   -0.07    0.22
  12  -4   0   18.19    1.98
  12  -4   0   15.18    1.46
  11  -4   0    0.22    0.36
  11  -4   0    0.31    0.19
  10  -4   0    2.12    0.43
  10  -4   0    1.96    0.28
   9  -4   0   -0.17    0.25
   9  -4   0   -0.04    0.13
   8  -4   0   46.47    4.29
   8  -4   0   55.61    5.68
   7  -4   0    1.18    0.28
   7  -4   0    1.21    0.18
   6  -4   0    8.13    0.68
  -6   4   0    7.14    0.66
   5  -4   0    1.29    0.16
   5  -4   0    1.58    0.23
  -5   4   0    1.13    0.14
  -5   4   0    1.51    0.14
   4  -4   0   22.73    2.51
   4  -4   0   22.41    1.90
   3  -4   0    2.49    0.25
  -3   4   0    2.70    0.23
  -3   4   0    2.66    0.25
  -1   4   0    0.25    0.06
  -1   4   0    0.21    0.05
  -1   4   0    0.21    0.05
   0  -4   0   97.61   11.07
   0   4   0  102.72    8.39
   0   4   0   98.91    8.47
   0   4   0  102.32    7.53
  -1  -4   0    0.91    0.15
   1   4   0    0.72    0.10
   1   4   0    0.79    0.10
   1   4   0    0.99    0.10
   2   4   0    7.38    0.89
   2   4   0    7.42    0.67
   2   4   0    8.11    0.59
   3   4   0    0.09    0.06
   3   4   0    0.16    0.07
   3   4   0    0.08    0.08
   3   4   0    0.07    0.17
   4   4   0    4.95    0.49
   4   4   0    5.49    0.71
   4   4   0    5.88    0.49
   5   4   0    2.23    0.39
   5   4   0    1.78    0.25
   5   4   0    1.98    0.21
   5   4   0    2.25    0.25
   6   4   0   31.63    2.21
   6   4   0   30.88    2.49
   6   4   0   27.03    2.48
   6   4   0   27.31    3.29
   7   4   0    0.22    0.29
   7   4   0    0.31    0.14
   7   4   0    0.37    0.11
   8   4   0    3.34    0.59
   8   4   0    4.28    0.41
   9   4   0   -0.10    0.15
   9   4   0    0.26    0.35
  10   4   0   12.42    1.13
  10   4   0   12.95    1.58
  11   4   0    0.00    0.17
  11   4   0   -0.15    0.42
  12   4   0    0.77    0.22
  12   4   0    0.60    0.51
  13   4   0    0.05    0.54
  13   4   0    0.66    0.24
  14   4   0   -0.18    0.57
  14   4   0    0.67    0.26
  15   4   0   -0.03    0.23
  15   4   0   -0.42    0.61
  16   4   0   -0.52    0.67
  17  -5   0   -0.44    0.65
  16  -5   0   -0.13    0.61
  15  -5   0    0.12    0.23
  15  -5   0   -1.15    0.53
  14  -5   0    1.22    0.29
  14  -5   0    0.62    0.53
  13  -5   0   -0.18    0.21
  13  -5   0   -0.11    0.44
  12  -5   0    2.40    0.33
  12  -5   0    1.86    0.50
  11  -5   0    0.17    0.34
  11  -5   0    0.33    0.18
  10  -5   0    7.50    1.12
  10  -5   0    9.71    0.81
   9  -5   0    0.30    0.14
   9  -5   0    0.29    0.26
   8  -5   0   37.41    3.85
   8  -5   0   31.34    2.91
   7  -5   0    0.45    0.13
   7  -5   0    0.72    0.25
   6  -5   0    0.06    0.10
   6  -5   0   -0.08    0.19
  -6   5   0    0.17    0.08
  -6   5   0    0.08    0.07
   5  -5   0    0.20    0.16
   5  -5   0    0.15    0.08
  -5   5   0    0.09    0.07
  -5   5   0    0.09    0.07
   4  -5   0   49.95    5.53
   4  -5   0   54.94    4.20
  -4   5   0   48.36    3.76
  -4   5   0   46.89    4.23
   3  -5   0   -0.02    0.05
   3  -5   0   -0.02    0.09
  -3   5   0   -0.10    0.05
  -3   5   0    0.02    0.06
   2  -5   0    6.72    0.86
   2  -5   0    6.41    0.65
  -2   5   0    8.81    0.59
  -2   5   0    8.59    0.67
   1  -5   0    0.36    0.10
  -1   5   0    0.12    0.06
  -1   5   0    0.11    0.06
  -1   5   0    0.17    0.05
   0  -5   0   22.36    2.59
   0   5   0   23.12    1.98
   0   5   0   23.97    1.76
   0   5   0   23.66    1.96
  -1  -5   0    0.54    0.14
   1   5   0    0.44    0.08
   1   5   0    0.33    0.07
   1   5   0    0.25    0.09
   2   5   0   64.26    5.52
   2   5   0   66.40    4.91
   3   5   0    1.07    0.15
   3   5   0    1.21    0.16
   3   5   0    0.96    0.26
   3   5   0    1.07    0.13
   4   5   0   11.94    1.16
   4   5   0   14.12    1.04
   4   5   0   14.82    1.58
   4   5   0   13.36    1.17
   5   5   0    2.08    0.24
   5   5   0    1.77    0.23
   5   5   0    2.76    0.27
   7   5   0   -0.27    0.12
   7   5   0   -0.12    0.31
   7   5   0   -0.14    0.10
   7   5   0   -0.01    0.12
   8   5   0    0.19    0.11
   8   5   0   -0.03    0.35
   8   5   0   -0.03    0.14
   9   5   0    0.58    0.18
   9   5   0    0.16    0.39
  10   5   0    5.05    0.91
  10   5   0    6.65    0.61
  11   5   0    0.34    0.48
  11   5   0   -0.03    0.19
  12   5   0    3.50    0.43
  12   5   0    2.99    0.70
  13   5   0   -0.23    0.56
  13   5   0   -0.04    0.22
  14   5   0    0.39    0.24
  14   5   0    0.07    0.62
  15   5   0    0.09    0.25
  15   5   0   -0.22    0.64
  17  -6   0   -0.47    0.66
  16  -6   0    0.15    0.59
  15  -6   0    0.04    0.23
  15  -6   0   -0.95    0.52
  14  -6   0   -0.34    0.48
  14  -6   0    0.06    0.24
  13  -6   0   -0.29    0.42
  13  -6   0   -0.14    0.22
  12  -6   0    4.80    0.83
  12  -6   0    5.48    0.58
  11  -6   0    0.34    0.19
  11  -6   0    0.49    0.34
  10  -6   0    2.53    0.34
  10  -6   0    3.17    0.50
   9  -6   0    0.41    0.26
   9  -6   0    0.33    0.16
   8  -6   0    1.01    0.29
   8  -6   0    1.20    0.20
  -8   6   0    1.14    0.15
   7  -6   0    0.06    0.12
   7  -6   0   -0.01    0.22
  -7   6   0    0.53    0.10
  -7   6   0    0.38    0.10
   6  -6   0    4.82    0.47
   6  -6   0    6.05    0.64
  -6   6   0    4.28    0.47
  -6   6   0    4.95    0.42
   5  -6   0    1.84    0.25
   5  -6   0    2.30    0.32
  -5   6   0    2.41    0.21
  -5   6   0    2.05    0.23
   4  -6   0   23.45    2.00
   4  -6   0   22.14    2.64
  -4   6   0   24.99    1.79
  -4   6   0   23.88    2.02
   3  -6   0    1.28    0.19
   3  -6   0    1.14    0.15
  -3   6   0    1.17    0.14
  -3   6   0    0.96    0.15
   2  -6   0   62.22    7.74
  -2   6   0   74.77    5.27
  -2   6   0   73.40    5.93
   1  -6   0    1.01    0.19
  -1   6   0    0.84    0.12
  -1   6   0    1.02    0.13
  -1   6   0    1.11    0.13
   0  -6   0   43.37    5.18
   0   6   0   46.55    3.93
   0   6   0   48.51    3.53
   0   6   0   48.97    3.97
  -1  -6   0    2.06    0.26
   1   6   0    1.50    0.22
   1   6   0    1.46    0.20
   1   6   0    1.82    0.19
  -2  -6   0   11.78    1.31
   2   6   0   12.17    0.88
   2   6   0   11.58    1.00
   2   6   0   10.16    0.98
   3   6   0    2.73    0.26
   3   6   0    2.39    0.28
   3   6   0    3.02    0.30
   4   6   0    8.97    0.83
   4   6   0    9.90    0.84
   5   6   0    0.71    0.13
   5   6   0    0.78    0.16
   5   6   0    1.65    0.34
   5   6   0    0.91    0.15
   7   6   0    0.50    0.15
   7   6   0    0.61    0.13
   7   6   0    0.62    0.16
   8   6   0    1.12    0.17
   8   6   0    0.69    0.41
   8   6   0    0.96    0.20
   9   6   0    0.14    0.16
   9   6   0    0.22    0.43
  10   6   0    3.11    0.40
  10   6   0    3.09    0.63
  11   6   0    0.22    0.20
  11   6   0   -0.08    0.50
  12   6   0    5.05    0.51
  12   6   0    3.02    0.76
  13   6   0   -0.57    0.56
  13   6   0   -0.19    0.21
  14   6   0    0.20    0.25
  14   6   0    0.23    0.63
  15   6   0    0.27    0.68
  17  -7   0   -0.01    0.63
  16  -7   0    0.22    0.60
  15  -7   0    0.13    0.54
  14  -7   0   -0.08    0.45
  14  -7   0    0.02    0.25
  13  -7   0    0.15    0.42
  13  -7   0    0.28    0.24
  12  -7   0    1.99    0.32
  12  -7   0    1.32    0.44
  11  -7   0    0.20    0.20
  11  -7   0   -0.20    0.32
  10  -7   0    3.76    0.46
  10  -7   0    3.92    0.62
   9  -7   0    0.53    0.28
   9  -7   0    0.67    0.18
   8  -7   0    5.00    0.65
   8  -7   0    4.45    0.43
  -8   7   0    4.11    0.36
  -8   7   0    3.19    0.41
   7  -7   0    0.06    0.21
   7  -7   0   -0.07    0.11
  -7   7   0    0.18    0.10
  -7   7   0    0.22    0.10
   6  -7   0   22.37    1.76
   6  -7   0   20.60    2.32
  -6   7   0   19.38    1.77
  -6   7   0   19.98    1.57
   5  -7   0    2.68    0.33
   5  -7   0    2.11    0.26
  -5   7   0    1.99    0.25
  -5   7   0    2.00    0.24
   4  -7   0   22.59    2.83
   4  -7   0   23.03    2.14
  -4   7   0   30.64    2.17
   3  -7   0    2.16    0.37
   3  -7   0    2.28    0.24
  -3   7   0    2.30    0.24
  -3   7   0    2.44    0.29
  -2   7   0   15.49    1.15
  -2   7   0   14.41    1.29
   1  -7   0    2.79    0.37
  -1   7   0    1.86    0.24
  -1   7   0    1.68    0.23
  -1   7   0    2.50    0.25
   0  -7   0   37.13    4.57
   0   7   0   42.95    3.11
   0   7   0   42.81    3.47
   0   7   0   42.17    3.50
  -1  -7   0    1.20    0.24
   1   7   0    1.22    0.16
   1   7   0    1.12    0.17
  -2  -7   0    9.37    1.09
   2   7   0    9.64    0.82
   2   7   0    9.36    0.74
   2   7   0    8.84    0.83
  -3  -7   0    2.77    0.37
   3   7   0    2.38    0.32
   3   7   0    2.20    0.26
   3   7   0    2.67    0.29
   4   7   0    8.44    0.63
   4   7   0    7.94    0.72
   4   7   0    7.15    0.70
   5   7   0    2.30    0.25
   5   7   0    1.41    0.22
   5   7   0    2.23    0.41
   5   7   0    1.58    0.19
   6   7   0   16.48    1.43
   6   7   0   16.08    1.26
   6   7   0   16.24    1.41
   7   7   0   -0.12    0.17
   7   7   0    0.14    0.15
   7   7   0   -0.12    0.13
   7   7   0    0.34    0.39
   8   7   0    9.63    0.82
   8   7   0    7.67    1.15
   9   7   0    0.78    0.22
   9   7   0    0.94    0.48
  10   7   0    1.66    0.28
  10   7   0    0.76    0.52
  11   7   0   -0.36    0.52
  11   7   0   -0.18    0.21
  12   7   0    0.97    0.27
  12   7   0    0.31    0.58
  13   7   0    0.24    0.25
  13   7   0    0.12    0.61
  14   7   0    0.12    0.66
  17  -8   0    0.11    0.65
  16  -8   0    0.16    0.58
  15  -8   0    0.01    0.51
  14  -8   0    1.00    0.49
  13  -8   0   -0.01    0.40
  13  -8   0    0.23    0.24
  12  -8   0    0.93    0.27
  12  -8   0    0.35    0.37
  11  -8   0   -0.20    0.20
  11  -8   0   -0.34    0.32
  10  -8   0   15.01    1.24
  10  -8   0   12.49    1.65
   9  -8   0    0.35    0.18
   8  -8   0    0.07    0.14
   8  -8   0    0.21    0.24
  -8   8   0    0.15    0.11
  -8   8   0   -0.06    0.12
   7  -8   0    0.34    0.22
   7  -8   0    0.34    0.13
  -7   8   0    0.25    0.13
  -7   8   0    0.06    0.11
   6  -8   0   16.04    1.73
   6  -8   0   17.23    1.31
  -6   8   0   13.11    1.31
  -6   8   0   14.09    1.16
   5  -8   0    1.37    0.18
   5  -8   0    1.33    0.25
  -5   8   0    1.14    0.19
  -5   8   0    1.41    0.17
   4  -8   0   25.96    2.43
   4  -8   0   27.22    3.21
  -4   8   0   30.14    2.46
  -4   8   0   32.00    2.19
   3  -8   0    1.07    0.21
   3  -8   0    1.59    0.18
  -3   8   0    1.77    0.20
  -3   8   0    0.87    0.17
  -2   8   0   12.02    1.08
  -2   8   0   12.40    0.95
   1  -8   0    0.42    0.18
  -1   8   0    0.35    0.13
  -1   8   0    0.53    0.12
  -1   8   0    0.42    0.11
   0  -8   0    6.98    0.92
   0   8   0    8.36    0.71
   0   8   0    7.62    0.69
   0   8   0    8.10    0.62
  -1  -8   0   -0.01    0.16
   1   8   0    0.04    0.09
   1   8   0    0.02    0.11
   1   8   0    0.11    0.10
  -2  -8   0   46.46    5.44
   2   8   0   43.58    4.13
   2   8   0   52.31    3.71
   2   8   0   54.16    4.18
  -3  -8   0    0.27    0.19
   3   8   0    0.40    0.13
   3   8   0    0.38    0.13
   3   8   0    0.06    0.14
  -4  -8   0    7.13    0.81
   4   8   0    6.47    0.54
   4   8   0    5.90    0.60
   4   8   0    6.58    0.62
   5   8   0    2.44    0.26
   5   8   0    2.47    0.30
   5   8   0    2.47    0.31
   7   8   0    0.13    0.15
   7   8   0    0.15    0.15
   7   8   0    0.05    0.19
   7   8   0    0.20    0.40
   8   8   0    0.36    0.18
   8   8   0    0.01    0.44
   9   8   0    1.86    0.53
  10   8   0    3.86    0.48
  11   8   0    0.08    0.57
  11   8   0   -0.04    0.21
  12   8   0    0.74    0.27
  12   8   0    0.39    0.62
  13   8   0   -0.15    0.64
  13   8   0    0.03    0.24
  14   8   0    0.94    0.72
  16  -9   0    0.00    0.56
  15  -9   0   -0.26    0.51
  14  -9   0    0.36    0.45
  13  -9   0    0.55    0.41
  13  -9   0    0.49    0.27
  12  -9   0    1.63    0.30
  12  -9   0    0.29    0.38
  11  -9   0    0.07    0.22
  11  -9   0   -0.35    0.31
  10  -9   0    5.61    0.60
  10  -9   0    5.58    0.84
   9  -9   0   -0.09    0.18
   9  -9   0    0.21    0.29
   8  -9   0    0.64    0.18
   8  -9   0    0.91    0.28
  -8   9   0    0.46    0.16
  -8   9   0    0.56    0.15
   7  -9   0    2.39    0.33
   7  -9   0    3.19    0.44
  -7   9   0    2.96    0.28
  -7   9   0    2.39    0.31
   6  -9   0    0.84    0.15
  -6   9   0    0.51    0.16
  -6   9   0    0.66    0.14
   5  -9   0    2.14    0.28
   5  -9   0    2.82    0.44
  -5   9   0    2.59    0.26
  -5   9   0    2.34    0.29
   4  -9   0   15.78    2.01
  -4   9   0   19.78    1.37
  -4   9   0   17.88    1.54
   3  -9   0    0.14    0.09
   3  -9   0    0.16    0.16
  -3   9   0    0.04    0.13
  -3   9   0    0.11    0.11
  -2   9   0   61.06    4.64
  -2   9   0   62.17    5.23
   1  -9   0    1.89    0.31
  -1   9   0    1.58    0.21
  -1   9   0    1.82    0.24
  -1   9   0    1.80    0.21
   0  -9   0    0.61    0.21
   0   9   0    0.87    0.15
   0   9   0    0.75    0.14
   0   9   0    1.17    0.18
  -1  -9   0    0.85    0.23
   1   9   0    1.19    0.19
   1   9   0    0.76    0.14
   1   9   0    0.95    0.16
  -2  -9   0    5.03    0.68
   2   9   0    6.00    0.53
   2   9   0    4.13    0.49
   2   9   0    6.03    0.46
   3   9   0    1.44    0.21
   3   9   0    1.24    0.17
  -4  -9   0   11.42    1.23
   4   9   0   10.74    0.92
   4   9   0    9.87    0.93
   4   9   0    9.37    0.82
  -5  -9   0    0.90    0.28
   5   9   0    0.70    0.21
   5   9   0    1.23    0.21
   5   9   0    1.01    0.18
   6   9   0    0.02    0.14
   6   9   0   -0.13    0.15
   6   9   0    0.00    0.18
   7   9   0    0.37    0.21
   7   9   0    0.49    0.18
   7   9   0    0.19    0.17
   8   9   0    1.08    0.45
   9   9   0    0.54    0.22
   9   9   0    0.86    0.54
  10   9   0    1.13    0.58
  11   9   0    0.10    0.22
  11   9   0   -0.29    0.57
  12   9   0    0.67    0.27
  12   9   0    0.02    0.61
  13   9   0    0.37    0.66
  15 -10   0   -0.95    0.48
  14 -10   0   -0.05    0.43
  13 -10   0    0.33    0.42
  12 -10   0    3.78    0.53
  11 -10   0    1.39    0.30
  11 -10   0    1.06    0.40
  10 -10   0    3.91    0.46
  10 -10   0    3.00    0.55
   9 -10   0    0.27    0.31
   9 -10   0    0.18    0.20
   8 -10   0    8.84    0.81
   8 -10   0   10.62    1.12
  -8  10   0    6.76    0.83
  -8  10   0    9.19    0.72
   7 -10   0    0.09    0.24
   7 -10   0    0.29    0.15
  -7  10   0   -0.18    0.16
  -7  10   0    0.08    0.14
   6 -10   0   22.65    2.42
   6 -10   0   22.64    1.83
  -6  10   0   19.89    1.64
  -6  10   0   20.08    1.85
   5 -10   0    1.65    0.24
   5 -10   0    1.95    0.34
  -5  10   0    2.50    0.27
  -5  10   0    2.05    0.26
   4 -10   0    2.57    0.42
   3 -10   0    1.80    0.26
   3 -10   0    2.43    0.35
  -3  10   0    2.29    0.30
  -3  10   0    2.83    0.27
   2 -10   0    5.31    0.77
  -2  10   0    6.78    0.61
  -2  10   0    6.49    0.52
   1 -10   0    0.10    0.18
  -1  10   0   -0.02    0.10
  -1  10   0   -0.06    0.12
  -1  10   0    0.01    0.15
   0 -10   0    1.41    0.26
   0  10   0    1.81    0.24
   0  10   0    1.29    0.19
   0  10   0    1.23    0.19
  -1 -10   0    2.35    0.35
   1  10   0    2.42    0.26
   1  10   0    1.83    0.29
   1  10   0    1.97    0.27
  -2 -10   0    3.11    0.42
   2  10   0    2.45    0.31
   2  10   0    2.77    0.32
   2  10   0    2.81    0.34
  -3 -10   0    0.88    0.28
   3  10   0    1.64    0.20
   3  10   0    1.57    0.23
   3  10   0    1.29    0.21
   4  10   0    8.74    0.70
   4  10   0    8.46    0.78
   4  10   0    8.45    0.81
  -5 -10   0    0.27    0.25
   5  10   0    0.64    0.16
   5  10   0    0.38    0.20
   5  10   0    0.42    0.17
  -6 -10   0    1.05    0.34
   6  10   0    0.99    0.23
   6  10   0    1.32    0.26
   6  10   0    1.65    0.23
   7  10   0   -0.16    0.16
   7  10   0    0.33    0.18
   7  10   0   -0.06    0.22
   8  10   0    4.87    0.53
   9  10   0    1.21    0.27
  10  10   0    0.33    0.22
  11  10   0    0.08    0.23
  11  10   0    0.88    0.55
  12  10   0    0.51    0.59
  12 -11   0    0.92    0.40
  11 -11   0    0.02    0.25
  11 -11   0    0.53    0.38
  10 -11   0    2.01    0.47
  10 -11   0    2.24    0.35
   9 -11   0    0.41    0.32
   9 -11   0    0.26    0.21
   8 -11   0    1.51    0.38
   8 -11   0    1.30    0.25
  -8  11   0    1.16    0.21
  -8  11   0    1.43    0.26
   7 -11   0    0.25    0.16
   7 -11   0    0.09    0.25
  -7  11   0    0.58    0.17
  -7  11   0    0.39    0.20
   6 -11   0    2.54    0.42
   6 -11   0    2.26    0.29
  -6  11   0    2.33    0.32
  -6  11   0    2.20    0.28
   5 -11   0    0.74    0.25
   5 -11   0    0.54    0.16
  -5  11   0    0.65    0.17
  -5  11   0    0.69    0.20
   4 -11   0    4.12    0.62
   3 -11   0    1.71    0.31
   3 -11   0    1.66    0.23
  -3  11   0    1.85    0.28
  -3  11   0    2.06    0.25
   2 -11   0    2.16    0.39
  -2  11   0    3.20    0.32
  -2  11   0    3.35    0.39
   1 -11   0    0.43    0.22
  -1  11   0    0.36    0.14
  -1  11   0    0.14    0.20
  -1  11   0    0.32    0.15
   0 -11   0   38.42    4.59
   0  11   0   44.99    3.53
   0  11   0   41.03    3.13
   0  11   0   40.65    3.48
  -1 -11   0   -0.09    0.21
   1  11   0   -0.05    0.19
   1  11   0    0.13    0.14
   1  11   0    0.00    0.15
  -2 -11   0    0.63    0.25
   2  11   0    0.40    0.21
   2  11   0    0.29    0.16
   2  11   0    0.58    0.16
  -3 -11   0   -0.02    0.21
   3  11   0   -0.31    0.14
   3  11   0   -0.32    0.17
   3  11   0    0.03    0.14
  -4 -11   0    9.63    1.11
   4  11   0    8.38    0.86
   4  11   0    8.44    0.74
   4  11   0    9.76    0.84
  -5 -11   0    0.69    0.29
   5  11   0    0.20    0.22
   5  11   0    0.71    0.19
   5  11   0    0.56    0.19
  -6 -11   0    0.28    0.28
   6  11   0    0.08    0.23
   6  11   0    0.10    0.17
   6  11   0    0.04    0.17
  -7 -11   0    0.61    0.32
   7  11   0    0.66    0.26
   7  11   0    0.33    0.20
   7  11   0    0.40    0.20
  -8 -11   0    3.47    0.59
   8  11   0    3.02    0.41
   9  11   0   -0.01    0.21
  10  11   0    0.33    0.24
  11 -12   0   -0.08    0.26
  10 -12   0    5.02    0.59
  10 -12   0    5.43    0.85
   9 -12   0    2.91    0.52
   9 -12   0    2.83    0.37
  -9  12   0    2.23    0.31
  -9  12   0    2.54    0.37
   8 -12   0    0.01    0.18
   8 -12   0    0.26    0.29
  -8  12   0    0.01    0.17
  -8  12   0   -0.13    0.22
   7 -12   0    0.85    0.30
   7 -12   0    0.86    0.21
  -7  12   0    0.99    0.21
  -7  12   0    1.09    0.26
   6 -12   0    2.60    0.35
   6 -12   0    3.46    0.48
  -6  12   0    2.63    0.32
  -6  12   0    2.45    0.37
   5 -12   0    1.01    0.28
   5 -12   0    0.87    0.18
  -5  12   0    0.47    0.19
  -5  12   0    0.80    0.24
   4 -12   0   10.31    1.08
   4 -12   0   11.64    1.44
  -4  12   0   15.58    1.14
   3 -12   0   -0.10    0.13
   3 -12   0   -0.15    0.20
  -3  12   0   -0.43    0.20
  -3  12   0   -0.17    0.15
   2 -12   0    0.22    0.21
  -2  12   0    0.56    0.23
  -2  12   0    0.12    0.16
   1 -12   0    0.83    0.26
  -1  12   0    0.61    0.24
  -1  12   0    0.87    0.17
  -1  12   0    0.76    0.19
   0 -12   0    0.27    0.23
   0  12   0    0.76    0.23
   0  12   0    0.54    0.16
   0  12   0    0.39    0.17
  -1 -12   0    0.13    0.23
   1  12   0   -0.11    0.15
   1  12   0    0.11    0.13
   1  12   0   -0.18    0.20
  -2 -12   0   -0.15    0.22
   2  12   0   -0.38    0.19
   2  12   0   -0.37    0.15
   2  12   0    0.05    0.14
  -3 -12   0    1.50    0.32
   3  12   0    1.12    0.22
   3  12   0    0.98    0.25
   3  12   0    1.29    0.22
  -4 -12   0    3.94    0.60
   4  12   0    3.68    0.42
   4  12   0    3.33    0.48
   4  12   0    3.36    0.38
  -5 -12   0    0.34    0.27
   5  12   0    0.69    0.20
   5  12   0    0.94    0.21
   5  12   0    0.74    0.25
  -6 -12   0    0.09    0.28
   6  12   0   -0.16    0.19
   6  12   0   -0.15    0.24
   6  12   0    0.06    0.19
  -7 -12   0    1.27    0.37
   7  12   0    1.00    0.24
   7  12   0    0.87    0.30
   7  12   0    1.37    0.26
  -8 -12   0    1.70    0.42
   8  12   0    1.93    0.32
  -9 -12   0    0.31    0.34
   9  12   0    0.03    0.22
 -10 -12   0    1.94    0.47
 -11 -12   0    0.13    0.37
  10 -13   0    5.51    0.61
   9 -13   0    0.32    0.23
  -9  13   0    0.62    0.20
  -9  13   0    0.40    0.26
   8 -13   0    6.16    0.64
  -8  13   0    6.41    0.57
  -8  13   0    5.88    0.69
   7 -13   0    0.99    0.23
   7 -13   0    0.84    0.32
  -7  13   0    0.78    0.23
  -7  13   0    0.81    0.28
   6 -13   0    2.10    0.29
   6 -13   0    2.32    0.43
  -6  13   0    1.71    0.28
  -6  13   0    2.02    0.35
   5 -13   0    0.21    0.16
   5 -13   0    0.36    0.28
  -5  13   0    0.40    0.19
  -5  13   0    0.16    0.26
   3 -13   0    0.50    0.23
   3 -13   0    0.17    0.15
  -3  13   0    0.07    0.24
  -3  13   0    0.07    0.17
   2 -13   0    0.29    0.24
  -2  13   0   -0.33    0.23
  -2  13   0   -0.21    0.17
   1 -13   0    0.10    0.23
  -1  13   0    0.08    0.14
  -1  13   0   -0.30    0.23
   0 -13   0    1.03    0.30
   0  13   0    0.49    0.20
   0  13   0    0.99    0.27
   0  13   0    1.08    0.20
  -1 -13   0    1.36    0.32
   1  13   0    1.42    0.22
   1  13   0    0.75    0.26
   1  13   0    0.61    0.21
  -2 -13   0    0.16    0.26
   2  13   0    0.13    0.17
   2  13   0    0.28    0.21
   2  13   0    0.17    0.16
  -3 -13   0    2.32    0.42
   3  13   0    1.63    0.32
   3  13   0    2.17    0.31
   3  13   0    2.16    0.29
  -4 -13   0    2.94    0.46
   4  13   0    2.06    0.35
   4  13   0    2.10    0.29
   4  13   0    2.65    0.35
  -5 -13   0   -0.10    0.27
   5  13   0   -0.12    0.18
   5  13   0    0.01    0.19
   5  13   0   -0.47    0.23
  -6 -13   0    3.62    0.59
   6  13   0    3.28    0.40
   6  13   0    3.47    0.44
   6  13   0    3.29    0.44
  -7 -13   0    0.74    0.33
   7  13   0    0.58    0.25
   7  13   0    0.61    0.24
   7  13   0    0.60    0.30
  -8 -13   0    0.52    0.34
   8  13   0    0.45    0.24
  -9 -13   0    0.27    0.35
 -10 -13   0    0.35    0.38
   9 -14   0    0.09    0.24
  -9  14   0    0.64    0.25
   8 -14   0    3.59    0.48
  -8  14   0    4.07    0.57
  -8  14   0    4.45    0.46
   7 -14   0    0.47    0.22
  -7  14   0    0.97    0.31
  -7  14   0    1.05    0.23
   6 -14   0    0.16    0.19
  -6  14   0    0.22    0.21
  -6  14   0    0.10    0.28
   5 -14   0    1.13    0.23
  -5  14   0    1.28    0.32
  -5  14   0    1.19    0.24
  -4  14   0    4.50    0.58
  -4  14   0    4.81    0.49
   3 -14   0    0.70    0.26
   3 -14   0    0.35    0.17
  -3  14   0    0.73    0.28
  -3  14   0    0.61    0.20
   2 -14   0    1.90    0.36
  -2  14   0    0.80    0.23
  -2  14   0    1.21    0.32
   1 -14   0    3.11    0.46
  -1  14   0    2.54    0.33
  -1  14   0    2.12    0.38
  -1  14   0    2.33    0.32
   0 -14   0   12.90    1.63
   0  14   0   15.85    1.27
   0  14   0   13.18    1.10
   0  14   0   13.71    1.23
  -1 -14   0    0.10    0.27
   1  14   0    0.70    0.19
   1  14   0    0.00    0.17
   1  14   0    0.59    0.24
  -2 -14   0    8.48    1.02
   2  14   0    6.34    0.67
   2  14   0    8.08    0.75
   2  14   0    8.79    0.80
  -3 -14   0    0.36    0.29
   3  14   0    0.64    0.21
   3  14   0    0.48    0.26
   3  14   0    0.39    0.19
  -4 -14   0   -0.12    0.29
   4  14   0    0.06    0.18
   4  14   0   -0.14    0.19
   4  14   0    0.04    0.25
  -5 -14   0    0.47    0.32
   5  14   0    0.27    0.21
   5  14   0    0.33    0.27
   5  14   0    0.34    0.21
  -6 -14   0    1.14    0.36
   6  14   0    0.99    0.32
   6  14   0    1.40    0.27
   6  14   0    0.80    0.25
  -7 -14   0    0.01    0.30
   7  14   0   -0.06    0.29
   7  14   0   -0.11    0.21
   7  14   0    0.02    0.22
  -8 -14   0    0.78    0.36
  -9 -14   0    0.30    0.36
  -9  15   0    0.13    0.26
   8 -15   0    1.63    0.30
  -8  15   0    1.24    0.26
  -8  15   0    1.91    0.35
   7 -15   0    0.51    0.23
  -7  15   0    1.69    0.34
  -7  15   0    1.11    0.24
   6 -15   0    0.84    0.23
  -6  15   0    0.74    0.31
   5 -15   0   -0.13    0.18
  -5  15   0   -0.01    0.28
  -5  15   0    0.16    0.20
   4 -15   0    0.11    0.19
  -4  15   0    0.73    0.22
  -4  15   0    1.09    0.30
   3 -15   0    0.02    0.17
  -3  15   0    0.24    0.28
  -3  15   0    0.27    0.20
  -2  15   0    9.06    0.82
  -2  15   0   10.80    0.97
  -1  15   0    0.24    0.18
  -1  15   0    0.51    0.20
  -1  15   0    0.15    0.25
   0  15   0    0.55    0.21
   0  15   0    0.43    0.26
   0  15   0    0.57    0.20
  -1 -15   0    0.94    0.33
   1  15   0    0.96    0.22
   1  15   0    0.45    0.26
   1  15   0    1.08    0.23
  -2 -15   0    2.92    0.50
   2  15   0    2.65    0.36
   2  15   0    2.94    0.35
   2  15   0    2.42    0.38
  -3 -15   0   -0.14    0.30
   3  15   0    0.35    0.20
   3  15   0    0.27    0.26
   3  15   0    0.30    0.21
  -4 -15   0   -0.30    0.28
   4  15   0   -0.08    0.26
   4  15   0   -0.03    0.20
   4  15   0   -0.10    0.18
  -5 -15   0    0.19    0.33
   5  15   0    0.61    0.23
   5  15   0    0.25    0.21
   5  15   0    0.48    0.29
  -6 -15   0   -0.04    0.32
   6  15   0    0.03    0.29
   6  15   0    0.29    0.23
  -7 -15   0    0.10    0.34
   7  15   0   -0.05    0.30
  -8 -15   0    0.53    0.37
  -9  16   0    0.27    0.28
  -8  16   0    0.40    0.28
  -8  16   0    0.23    0.23
  -7  16   0    0.96    0.25
  -7  16   0    1.06    0.33
   6 -16   0    0.52    0.23
  -6  16   0    0.91    0.33
  -6  16   0    0.81    0.24
   5 -16   0    0.11    0.20
  -5  16   0    0.57    0.22
  -5  16   0    0.59    0.31
   4 -16   0    0.98    0.24
  -4  16   0    1.09    0.33
  -4  16   0    0.85    0.24
   3 -16   0    0.00    0.18
  -3  16   0    0.39    0.21
  -3  16   0   -0.06    0.28
   2 -16   0    0.78    0.24
  -2  16   0    2.51    0.35
  -2  16   0    1.65    0.26
  -1  16   0    1.23    0.26
  -1  16   0    1.11    0.31
   0  16   0    0.08    0.19
   0  16   0    0.16    0.26
   0  16   0    0.36    0.21
   1  16   0    0.98    0.29
   1  16   0    0.83    0.23
   1  16   0    1.06    0.24
   2  16   0    1.19    0.25
   2  16   0    1.21    0.32
   2  16   0    1.43    0.26
   3  16   0    0.24    0.22
   3  16   0    0.30    0.28
   3  16   0    0.00    0.21
   4  16   0    1.17    0.28
   4  16   0    1.19    0.31
   4  16   0    1.54    0.29
   5  16   0    0.11    0.29
   6  16   0    0.06    0.32
  -9  17   0    0.16    0.31
  -8  17   0    0.35    0.24
  -8  17   0    0.56    0.31
  -7  17   0   -0.28    0.32
  -7  17   0    0.04    0.22
   6 -17   0    0.75    0.25
  -6  17   0    0.70    0.34
  -6  17   0    0.71    0.25
   5 -17   0    0.99    0.25
  -5  17   0    0.76    0.26
  -5  17   0    1.28    0.35
   4 -17   0    0.12    0.21
  -4  17   0    0.41    0.32
  -4  17   0   -0.03    0.22
   3 -17   0    0.27    0.19
  -3  17   0    0.40    0.32
  -3  17   0    0.44    0.23
   2 -17   0    3.08    0.41
  -2  17   0    3.62    0.41
  -2  17   0    2.97    0.46
  -1  17   0    0.11    0.21
  -1  17   0   -0.02    0.28
   0  17   0    0.75    0.30
   0  17   0    0.94    0.25
   0  17   0    0.76    0.24
   1  17   0   -0.04    0.20
   1  17   0    0.19    0.29
   2  17   0    0.07    0.20
   2  17   0    0.14    0.29
   3  17   0    0.48    0.31
   4  17   0    0.28    0.30
   5  17   0   -0.12    0.31
  -9  18   0    0.34    0.33
  -8  18   0    0.23    0.32
  -7  18   0    0.44    0.33
  -6  18   0    0.72    0.34
   5 -18   0    0.24    0.23
  -5  18   0    0.46    0.36
   4 -18   0   -0.02    0.20
  -4  18   0    0.33    0.34
   3 -18   0    0.24    0.21
  -3  18   0    0.65    0.35
   2 -18   0    0.55    0.23
  -2  18   0    0.68    0.34
  -1  18   0    0.25    0.30
   0  18   0    0.39    0.30
   1  18   0    0.20    0.31
   2  18   0   -0.01    0.31
  -6  19   0    0.08    0.34
  -5  19   0    0.12    0.34
  -4  19   0    0.18    0.33
  -3  19   0    0.09    0.37
  -2  19   0    0.66    0.37
  -1  19   0    0.50    0.34
   0  19  -1    0.20    0.32
  -1  19  -1    0.12    0.31
  -2  19  -1    0.35    0.34
  -3  19  -1   -0.06    0.34
  -4  19  -1    0.17    0.35
  -5  19  -1    0.32    0.32
  -6  19  -1    0.15    0.32
  -7  19  -1   -0.13    0.32
   3  18  -1   -0.15    0.31
   2  18  -1    0.25    0.30
   1  18  -1    0.57    0.31
   0  18  -1    0.14    0.27
   0  18  -1   -0.02    0.20
  -1  18  -1    0.53    0.30
  -2  18  -1    0.39    0.31
   2 -18   1    0.21    0.22
  -3  18  -1    0.72    0.33
   3 -18   1    0.60    0.22
  -4  18  -1    0.39    0.33
   4 -18   1    0.26    0.20
  -5  18  -1    1.26    0.37
  -6  18  -1    0.70    0.32
  -7  18  -1    0.72    0.33
  -8  18  -1    0.13    0.30
  -9  18  -1    0.09    0.31
   5  17  -1    0.80    0.34
  -5 -17   1    0.52    0.37
   4  17  -1    0.17    0.31
  -4 -17   1   -0.30    0.32
   3  17  -1    0.42    0.30
   2  17  -1    0.01    0.28
   2  17  -1    0.19    0.21
   1  17  -1    0.60    0.22
   1  17  -1    0.50    0.23
   1  17  -1    0.64    0.29
   0  17  -1    0.80    0.28
   0  17  -1    0.21    0.21
   0  17  -1    0.73    0.22
  -1  17  -1    2.08    0.32
  -1  17  -1    2.47    0.40
  -2  17  -1    0.24    0.30
  -2  17  -1   -0.03    0.21
   2 -17   1    0.07    0.19
  -3  17  -1    3.29    0.46
  -3  17  -1    3.63    0.40
   3 -17   1    2.22    0.35
  -4  17  -1    0.52    0.24
  -4  17  -1    0.36    0.33
   4 -17   1    0.55    0.23
  -5  17  -1   -0.06    0.32
  -5  17  -1    0.01    0.23
   5 -17   1    0.05    0.20
  -6  17  -1    0.36    0.24
  -6  17  -1    0.20    0.32
  -7  17  -1    1.00    0.27
  -7  17  -1    0.69    0.35
  -8  17  -1    0.23    0.33
  -8  17  -1    0.35    0.24
  -9  17  -1   -0.22    0.32
   7  16  -1    0.20    0.33
  -7 -16   1   -0.11    0.37
   6  16  -1    0.33    0.32
  -6 -16   1    0.03    0.33
   5  16  -1    1.10    0.31
   5  16  -1    1.23    0.28
  -5 -16   1    1.45    0.40
   4  16  -1    0.63    0.22
   4  16  -1    0.39    0.22
   4  16  -1    0.83    0.29
  -4 -16   1    0.04    0.32
   3  16  -1    1.71    0.28
   3  16  -1    0.86    0.28
   3  16  -1    1.52    0.26
  -3 -16   1    1.50    0.40
   2  16  -1    0.50    0.21
   2  16  -1    0.31    0.26
   2  16  -1   -0.18    0.18
  -2 -16   1   -0.22    0.30
   1  16  -1    0.63    0.23
   1  16  -1    0.98    0.23
   1  16  -1    1.17    0.28
  -1 -16   1    0.59    0.35
   0  16  -1    0.63    0.28
   0  16  -1    0.49    0.20
   0 -16   1    0.59    0.32
  -1  16  -1    1.13    0.23
  -1  16  -1    0.75    0.20
  -1  16  -1    1.56    0.32
   1 -16   1    0.53    0.31
  -2  16  -1    0.14    0.30
  -2  16  -1    0.27    0.22
   2 -16   1    0.13    0.19
  -3  16  -1    0.58    0.33
  -3  16  -1    1.19    0.26
   3 -16   1    1.17    0.23
  -4  16  -1    0.45    0.30
  -4  16  -1    0.32    0.21
   4 -16   1   -0.07    0.19
  -5  16  -1    0.42    0.23
  -5  16  -1   -0.08    0.31
   5 -16   1    0.09    0.19
  -6  16  -1    1.33    0.36
  -6  16  -1    1.06    0.26
   6 -16   1    1.05    0.25
  -7  16  -1    0.77    0.33
  -7  16  -1    0.22    0.23
  -8  16  -1    2.48    0.41
  -8  16  -1    2.03    0.32
  -9  16  -1    0.03    0.32
  -8 -15   1    0.18    0.35
   7  15  -1    0.73    0.32
  -7 -15   1    0.41    0.36
   6  15  -1    0.02    0.21
   6  15  -1    0.19    0.28
   6  15  -1    0.24    0.22
  -6 -15   1   -0.23    0.32
   5  15  -1    0.01    0.20
   5  15  -1    0.25    0.20
   5  15  -1    0.10    0.27
  -5 -15   1    0.44    0.33
   4  15  -1    0.33    0.21
   4  15  -1   -0.03    0.18
   4  15  -1    0.37    0.26
  -4 -15   1   -0.05    0.29
   3  15  -1    0.72    0.22
   3  15  -1    0.78    0.25
   3  15  -1    0.78    0.22
  -3 -15   1    0.62    0.32
   2  15  -1   -0.01    0.17
   2  15  -1    0.39    0.24
   2  15  -1    0.00    0.18
  -2 -15   1    0.07    0.29
   1  15  -1    3.50    0.44
   1  15  -1    3.68    0.47
   1  15  -1    3.42    0.41
  -1 -15   1    4.89    0.62
   0  15  -1    0.51    0.27
   0  15  -1    0.66    0.21
   0  15  -1    0.16    0.18
   0 -15   1    0.20    0.29
  -1  15  -1    0.81    0.21
  -1  15  -1    1.20    0.22
  -1  15  -1    1.66    0.31
   1 -15   1    0.36    0.29
  -2  15  -1    0.40    0.29
  -2  15  -1    0.25    0.20
   2 -15   1    0.28    0.29
  -3  15  -1    1.83    0.38
  -3  15  -1    2.05    0.30
   3 -15   1    2.21    0.42
   3 -15   1    1.69    0.27
  -4  15  -1    2.08    0.36
  -4  15  -1    1.14    0.25
   4 -15   1    1.65    0.26
   4 -15   1    2.02    0.43
  -5  15  -1    0.52    0.30
  -5  15  -1    0.55    0.21
   5 -15   1    0.39    0.19
   5 -15   1    0.31    0.35
  -6  15  -1    2.02    0.37
  -6  15  -1    1.88    0.28
  -7  15  -1    4.66    0.61
  -7  15  -1    4.16    0.49
   7 -15   1    5.17    0.53
  -8  15  -1    0.39    0.22
  -8  15  -1    0.56    0.31
  -9  15  -1    0.77    0.23
  -9  15  -1    1.10    0.33
  -9 -14   1    0.08    0.35
  -8 -14   1   -0.10    0.31
   7  14  -1    0.97    0.27
   7  14  -1    1.01    0.30
   7  14  -1    0.80    0.25
  -7 -14   1    0.97    0.35
   6  14  -1    0.00    0.21
   6  14  -1   -0.09    0.27
   6  14  -1    0.08    0.21
  -6 -14   1    0.28    0.31
   5  14  -1    1.85    0.30
   5  14  -1    1.87    0.33
   5  14  -1    1.86    0.31
  -5 -14   1    2.39    0.45
   4  14  -1   -0.08    0.17
   4  14  -1    0.03    0.18
   4  14  -1    0.26    0.23
  -4 -14   1   -0.14    0.29
   3  14  -1    0.80    0.26
   3  14  -1    0.68    0.21
   3  14  -1    0.93    0.22
  -3 -14   1    1.06    0.33
   2  14  -1    1.38    0.23
   2  14  -1    1.27    0.27
   1  14  -1    7.46    0.69
   1  14  -1    8.29    0.81
   1  14  -1    7.70    0.75
  -1 -14   1    8.69    1.04
   0  14  -1    1.04    0.22
   0  14  -1    1.02    0.22
   0  14  -1    0.72    0.29
   0 -14   1    1.27    0.33
  -1  14  -1    3.23    0.39
  -1  14  -1    2.97    0.37
  -1  14  -1    3.45    0.45
   1 -14   1    4.24    0.61
  -2  14  -1    0.60    0.20
  -2  14  -1    1.27    0.28
  -3  14  -1    1.35    0.23
  -3  14  -1    1.62    0.30
  -4  14  -1    0.19    0.19
  -4  14  -1    0.08    0.25
   4 -14   1    0.23    0.28
   4 -14   1   -0.07    0.15
  -5  14  -1    1.43    0.33
  -5  14  -1    1.50    0.26
   5 -14   1    1.75    0.40
   5 -14   1    1.61    0.25
  -6  14  -1    1.53    0.23
  -6  14  -1    1.91    0.31
   6 -14   1    0.72    0.21
   6 -14   1    1.16    0.38
  -7  14  -1    2.31    0.31
  -7  14  -1    2.04    0.38
   7 -14   1    2.53    0.34
   7 -14   1    2.97    0.52
  -8  14  -1    1.95    0.25
   8 -14   1    1.10    0.38
   8 -14   1    0.99    0.26
  -9  14  -1    1.39    0.33
  -9  14  -1    1.26    0.25
 -10 -13   1   -0.05    0.36
  -9 -13   1    0.11    0.34
   8  13  -1    0.06    0.21
  -8 -13   1    0.00    0.31
   7  13  -1    1.39    0.32
   7  13  -1    1.34    0.29
   7  13  -1    1.78    0.29
  -7 -13   1    1.66    0.40
   6  13  -1    0.32    0.20
   6  13  -1    0.05    0.25
   6  13  -1    0.29    0.20
  -6 -13   1   -0.05    0.27
   5  13  -1    1.53    0.33
   5  13  -1    2.43    0.31
   5  13  -1    2.71    0.35
  -5 -13   1    2.62    0.45
   4  13  -1   -0.05    0.21
   4  13  -1   -0.12    0.16
   4  13  -1    0.05    0.16
  -4 -13   1   -0.02    0.27
   3  13  -1    2.66    0.35
   3  13  -1    3.07    0.38
   3  13  -1    3.25    0.41
  -3 -13   1    3.75    0.53
   2  13  -1    1.27    0.23
   2  13  -1    1.36    0.23
   2  13  -1    1.40    0.28
  -2 -13   1    1.31    0.34
   1  13  -1    1.46    0.25
   1  13  -1    0.69    0.18
  -1 -13   1    0.41    0.27
   0  13  -1    0.78    0.18
   0  13  -1    0.48    0.19
   0  13  -1    0.37    0.24
   0 -13   1    0.82    0.29
  -1  13  -1    0.35    0.16
  -1  13  -1    0.55    0.15
  -1  13  -1    0.64    0.23
   1 -13   1    0.21    0.24
  -2  13  -1    0.14    0.22
  -2  13  -1    0.07    0.15
   2 -13   1    0.27    0.24
  -3  13  -1    1.27    0.23
  -3  13  -1    1.08    0.27
   3 -13   1    1.30    0.32
   3 -13   1    1.14    0.21
  -4  13  -1    0.04    0.22
  -4  13  -1    0.05    0.16
   4 -13   1    0.00    0.14
   4 -13   1   -0.11    0.24
  -5  13  -1    0.54    0.26
  -5  13  -1    0.76    0.21
   5 -13   1    0.97    0.20
   5 -13   1    1.44    0.33
  -6  13  -1    4.14    0.40
  -6  13  -1    5.21    0.50
   6 -13   1    3.39    0.40
   6 -13   1    2.16    0.51
  -7  13  -1   -0.04    0.23
  -7  13  -1    0.03    0.18
   7 -13   1   -0.05    0.28
   7 -13   1    0.16    0.18
  -8  13  -1    0.83    0.27
  -8  13  -1    0.72    0.20
   8 -13   1    1.27    0.39
   8 -13   1    0.56    0.22
  -9  13  -1    5.98    0.61
  -9  13  -1    6.66    0.75
   9 -13   1    8.04    0.97
   9 -13   1    7.53    0.70
  10 -13   1    0.66    0.39
  11 -13   1    2.18    0.53
  12 -13   1    0.22    0.43
 -11 -12   1    0.51    0.39
 -10 -12   1    0.07    0.35
   9  12  -1    3.46    0.47
  -9 -12   1    4.08    0.65
   8  12  -1    0.08    0.20
  -8 -12   1    0.20    0.32
   7  12  -1    1.29    0.23
   7  12  -1    0.97    0.28
   7  12  -1    0.70    0.23
  -7 -12   1    0.69    0.34
   6  12  -1    3.73    0.45
   6  12  -1    4.16    0.52
   5  12  -1    1.37    0.22
   5  12  -1    0.75    0.24
   5  12  -1    0.99    0.23
  -5 -12   1    1.18    0.33
   4  12  -1   -0.06    0.16
   4  12  -1    0.02    0.16
   4  12  -1    0.12    0.21
  -4 -12   1   -0.22    0.25
   3  12  -1    3.74    0.48
   3  12  -1    2.86    0.37
   3  12  -1    4.06    0.41
  -3 -12   1    3.68    0.63
   2  12  -1    0.02    0.13
   2  12  -1    0.03    0.20
   2  12  -1    0.11    0.15
  -2 -12   1   -0.12    0.22
   1  12  -1    0.43    0.16
   1  12  -1    0.44    0.15
   1  12  -1    0.44    0.21
  -1 -12   1    0.25    0.24
   0  12  -1    0.34    0.14
   0  12  -1    0.21    0.18
   0  12  -1   -0.11    0.12
   0 -12   1   -0.44    0.21
  -1  12  -1    2.84    0.32
  -1  12  -1    2.71    0.31
  -1  12  -1    2.78    0.35
   1 -12   1    2.50    0.43
  -2  12  -1    1.54    0.23
  -2  12  -1    1.55    0.27
  -2  12  -1    1.59    0.23
   2 -12   1    1.65    0.33
  -3  12  -1    7.96    0.81
  -3  12  -1    7.26    0.70
   3 -12   1    9.78    0.77
   3 -12   1    8.71    1.04
  -4  12  -1    0.26    0.20
  -4  12  -1    0.30    0.15
   4 -12   1    0.25    0.14
   4 -12   1    0.40    0.24
  -5  12  -1   12.73    0.98
  -5  12  -1   12.34    1.12
   5 -12   1   12.54    1.46
   5 -12   1   11.72    1.08
  -6  12  -1   -0.20    0.15
  -6  12  -1   -0.08    0.20
   6 -12   1    0.02    0.14
   6 -12   1   -0.32    0.25
  -7  12  -1    5.94    0.57
  -7  12  -1    6.10    0.68
   7 -12   1    6.88    0.92
   7 -12   1    7.40    0.64
   8 -12   1    1.26    0.34
   8 -12   1    0.68    0.21
  -9  12  -1    0.48    0.18
  -9  12  -1    0.09    0.21
   9 -12   1    0.39    0.33
   9 -12   1    0.63    0.22
  10 -12   1    0.44    0.37
  11 -12   1    1.17    0.44
  12 -12   1    0.15    0.42
  13 -12   1    0.16    0.42
  10  11  -1    0.10    0.22
   9  11  -1    2.03    0.33
  -9 -11   1    2.04    0.45
   8  11  -1    0.84    0.24
  -8 -11   1    0.77    0.34
   7  11  -1    4.90    0.53
   7  11  -1    5.64    0.61
   7  11  -1    4.62    0.48
  -7 -11   1    4.97    0.74
   6  11  -1    1.81    0.26
   6  11  -1    1.74    0.27
   6  11  -1    1.43    0.28
  -6 -11   1    1.83    0.39
   5  11  -1    5.87    0.57
   5  11  -1    4.84    0.60
   5  11  -1    5.45    0.50
  -5 -11   1    6.38    0.79
   4  11  -1    5.71    0.55
   4  11  -1    5.42    0.60
   4  11  -1    5.62    0.51
   3  11  -1    0.18    0.19
   3  11  -1    0.10    0.15
   3  11  -1    0.23    0.15
  -3 -11   1    0.13    0.23
   2  11  -1    2.80    0.33
   2  11  -1    3.17    0.40
   1  11  -1    8.56    0.77
   1  11  -1    7.29    0.73
   1  11  -1    7.94    0.66
  -1 -11   1    8.30    1.00
   0  11  -1    1.29    0.24
   0  11  -1    1.37    0.20
   0 -11   1    1.31    0.29
  -1  11  -1   10.49    0.92
  -1  11  -1   10.04    0.84
  -1  11  -1    9.90    0.95
   1 -11   1   11.32    1.24
  -2  11  -1   -0.01    0.16
  -2  11  -1   -0.21    0.11
  -2  11  -1   -0.10    0.12
   2 -11   1    0.16    0.19
  -4  11  -1    1.27    0.20
  -4  11  -1    1.07    0.23
   4 -11   1    1.37    0.29
   4 -11   1    1.31    0.19
  -5  11  -1    3.39    0.39
  -5  11  -1    2.88    0.35
   5 -11   1    3.85    0.57
   5 -11   1    3.37    0.36
  -6  11  -1    8.94    0.68
  -6  11  -1    9.40    0.79
   6 -11   1    7.51    1.04
   6 -11   1    7.05    0.74
  -7  11  -1    4.33    0.42
  -7  11  -1    3.91    0.51
   7 -11   1    4.68    0.47
   7 -11   1    4.82    0.69
  -8  11  -1    0.59    0.17
  -8  11  -1    0.68    0.20
   8 -11   1    0.33    0.19
   8 -11   1    0.47    0.30
  -9  11  -1    3.30    0.45
  -9  11  -1    3.36    0.37
   9 -11   1    3.55    0.44
   9 -11   1    3.83    0.66
  10 -11   1    2.97    0.40
  10 -11   1    2.93    0.56
  11 -11   1    2.79    0.55
  12 -11   1    0.18    0.40
  13 -11   1    0.79    0.42
  14 -11   1   -0.13    0.45
  15 -11   1   -0.13    0.48
  16 -11   1   -0.26    0.56
  12  10  -1    0.78    0.59
  11  10  -1    0.50    0.25
  10  10  -1    0.16    0.22
   9  10  -1    0.94    0.24
   8  10  -1    0.99    0.24
   7  10  -1    1.10    0.21
   7  10  -1    1.25    0.24
   7  10  -1    1.18    0.26
  -7 -10   1    0.66    0.33
   6  10  -1    0.51    0.20
   6  10  -1    0.53    0.18
   6  10  -1    0.57    0.16
  -6 -10   1    0.80    0.30
   5  10  -1    4.07    0.37
   5  10  -1    3.11    0.38
   5  10  -1    3.36    0.43
  -5 -10   1    3.08    0.52
   4  10  -1    8.20    0.75
   4  10  -1    8.18    0.79
   4  10  -1    8.46    0.69
   3  10  -1    4.35    0.46
   3  10  -1    4.33    0.41
   3  10  -1    4.74    0.50
  -3 -10   1    5.04    0.64
   2  10  -1    0.70    0.13
   2  10  -1    0.42    0.13
   2  10  -1    0.95    0.18
  -2 -10   1    0.10    0.22
   1  10  -1    8.75    0.76
   1  10  -1   10.38    0.87
   0  10  -1    0.58    0.16
   0  10  -1    0.68    0.14
   0 -10   1    0.26    0.20
  -1  10  -1   11.66    0.96
  -1  10  -1   10.04    0.86
  -1  10  -1    9.95    0.98
   1 -10   1   11.97    1.28
  -2  10  -1   -0.04    0.11
  -2  10  -1   -0.09    0.14
  -2  10  -1    0.02    0.10
   2 -10   1    0.18    0.17
   3 -10   1   11.27    1.01
   3 -10   1   12.01    1.35
  -4  10  -1    0.51    0.17
  -4  10  -1    0.59    0.15
   4 -10   1    0.53    0.13
   4 -10   1    0.68    0.22
  -5  10  -1   -0.02    0.12
  -5  10  -1   -0.09    0.15
   5 -10   1    0.10    0.11
   5 -10   1    0.02    0.19
  -6  10  -1    4.95    0.51
  -6  10  -1    4.67    0.43
   6 -10   1    5.06    0.70
   6 -10   1    4.40    0.47
  -7  10  -1   11.94    1.18
  -7  10  -1   12.66    1.04
   7 -10   1   15.07    1.17
  -8  10  -1   -0.05    0.16
  -8  10  -1    0.08    0.14
   8 -10   1    0.24    0.27
   8 -10   1    0.11    0.15
  -9  10  -1    9.12    0.79
   9 -10   1   10.76    1.24
   9 -10   1    9.90    0.91
  10 -10   1    0.23    0.34
  10 -10   1    0.07    0.20
  11 -10   1    5.83    0.61
  11 -10   1    4.93    0.83
  12 -10   1    0.64    0.40
  13 -10   1    0.35    0.41
  14 -10   1    0.49    0.47
  15 -10   1   -0.30    0.49
  16 -10   1   -0.17    0.55
  13   9  -1   -0.15    0.66
  12   9  -1    0.28    0.62
  12   9  -1    0.53    0.26
  11   9  -1    1.29    0.64
  11   9  -1    2.65    0.37
  10   9  -1    0.18    0.22
  10   9  -1    0.81    0.56
   9   9  -1    3.16    0.41
   7   9  -1    3.43    0.44
   7   9  -1    3.32    0.36
   6   9  -1    0.57    0.19
   6   9  -1    0.70    0.18
   6   9  -1    0.78    0.16
   5   9  -1    3.40    0.34
   5   9  -1    3.28    0.43
   5   9  -1    3.29    0.37
   4   9  -1    4.04    0.47
   4   9  -1    4.37    0.43
   4   9  -1    4.26    0.39
   3   9  -1    7.73    0.77
   3   9  -1    8.21    0.67
   3   9  -1    8.69    0.75
  -3  -9   1    8.52    1.00
   2   9  -1    0.42    0.15
   2   9  -1    0.28    0.12
   2   9  -1    0.41    0.13
  -2  -9   1    0.22    0.20
   1   9  -1    3.02    0.34
   1   9  -1    3.42    0.32
   1   9  -1    3.90    0.38
  -1  -9   1    3.28    0.51
   0   9  -1    2.12    0.26
   0   9  -1    1.92    0.25
   0   9  -1    2.82    0.25
   0  -9   1    2.11    0.33
  -1   9  -1    0.94    0.14
  -1   9  -1    1.54    0.19
  -1   9  -1    0.89    0.14
   1  -9   1    0.88    0.23
  -2   9  -1    6.79    0.70
  -2   9  -1    6.82    0.61
  -2   9  -1    7.97    0.67
   2  -9   1    8.61    0.91
  -3   9  -1   32.61    2.42
  -3   9  -1   31.93    2.72
   3  -9   1   30.09    3.54
   3  -9   1   32.78    2.69
  -4   9  -1    4.75    0.42
   4  -9   1    4.89    0.64
   4  -9   1    4.67    0.45
  -5   9  -1   16.38    1.40
  -5   9  -1   18.06    1.24
   5  -9   1   15.01    1.37
   5  -9   1   14.56    1.82
  -6   9  -1    2.70    0.30
  -6   9  -1    2.05    0.28
   6  -9   1    2.72    0.30
   6  -9   1    2.91    0.49
  -7   9  -1    3.57    0.47
  -7   9  -1    4.37    0.40
   7  -9   1    5.25    0.45
  -8   9  -1    1.10    0.18
  -8   9  -1    1.07    0.16
   8  -9   1    0.79    0.29
   9  -9   1    3.89    0.45
   9  -9   1    3.70    0.68
  10  -9   1    0.30    0.20
  10  -9   1    0.62    0.34
  11  -9   1    1.60    0.28
  11  -9   1    0.69    0.37
  12  -9   1    0.75    0.39
  13  -9   1    1.16    0.44
  14  -9   1    0.57    0.47
  15  -9   1    0.28    0.52
  16  -9   1   -0.09    0.56
  14   8  -1    0.15    0.69
  13   8  -1    0.01    0.63
  13   8  -1   -0.02    0.24
  12   8  -1    0.30    0.24
  12   8  -1   -0.15    0.59
  11   8  -1    2.27    0.68
  11   8  -1    3.32    0.43
  10   8  -1    1.90    0.60
   9   8  -1    0.93    0.21
   9   8  -1    0.56    0.49
   8   8  -1   -0.18    0.16
   8   8  -1    0.13    0.43
   7   8  -1    3.70    0.46
   7   8  -1    5.35    0.51
   7   8  -1    4.44    0.42
   6   8  -1    1.56    0.19
   6   8  -1    1.00    0.20
   6   8  -1    1.09    0.21
   5   8  -1    0.02    0.12
   5   8  -1   -0.16    0.15
   5   8  -1    0.19    0.13
   4   8  -1   12.87    1.06
   4   8  -1   12.10    1.07
   4   8  -1   11.39    0.94
   3   8  -1   17.70    1.58
   3   8  -1   17.19    1.41
   3   8  -1   17.71    1.59
  -3  -8   1   21.04    2.09
   2   8  -1   63.10    5.38
   2   8  -1   63.86    4.78
   1   8  -1    1.64    0.19
   1   8  -1    1.41    0.20
   1   8  -1    1.77    0.21
  -1  -8   1    1.45    0.27
   0   8  -1    0.00    0.09
   0   8  -1    0.09    0.09
   0   8  -1    0.07    0.11
   0  -8   1   -0.03    0.16
  -1   8  -1    4.59    0.43
  -1   8  -1    5.09    0.46
  -1   8  -1    4.33    0.39
  -2   8  -1   32.36    2.58
  -2   8  -1   29.21    2.61
  -2   8  -1   30.20    2.32
  -3   8  -1    6.56    0.61
  -3   8  -1    6.45    0.53
   3  -8   1    6.24    0.57
   3  -8   1    6.47    0.78
  -4   8  -1    0.86    0.14
  -4   8  -1    0.59    0.14
   4  -8   1    0.86    0.12
   4  -8   1    0.78    0.19
  -5   8  -1   36.55    2.39
  -5   8  -1   33.63    2.69
   5  -8   1   29.11    3.52
   5  -8   1   26.86    2.66
  -6   8  -1    6.29    0.60
  -6   8  -1    6.45    0.53
   6  -8   1    6.76    0.58
   6  -8   1    5.57    0.80
  -7   8  -1    5.12    0.47
  -7   8  -1    4.97    0.54
   7  -8   1    6.72    0.55
   7  -8   1    6.05    0.77
  -8   8  -1    0.74    0.15
  -8   8  -1    0.91    0.14
   8  -8   1    0.77    0.18
   8  -8   1    1.21    0.30
   9  -8   1    8.18    0.76
   9  -8   1    7.87    1.05
  10  -8   1    0.39    0.31
  10  -8   1    0.02    0.18
  11  -8   1    0.13    0.20
  11  -8   1    0.22    0.34
  12  -8   1   -0.12    0.20
  12  -8   1   -0.03    0.36
  13  -8   1    0.61    0.41
  14  -8   1    0.11    0.45
  15  -8   1    0.57    0.54
  16  -8   1    1.39    0.62
  17  -8   1    0.02    0.65
  14   7  -1   -0.20    0.64
  13   7  -1    0.21    0.60
  13   7  -1    0.30    0.24
  12   7  -1    0.30    0.23
  12   7  -1   -0.06    0.56
  11   7  -1    1.17    0.60
  11   7  -1    2.21    0.33
  10   7  -1    1.36    0.27
  10   7  -1    1.44    0.55
   9   7  -1    5.77    0.59
   8   7  -1    1.24    0.46
   7   7  -1   16.90    2.12
   7   7  -1   19.51    1.60
   7   7  -1   17.30    1.59
   7   7  -1   19.34    1.41
   6   7  -1   33.75    3.38
   6   7  -1   27.73    2.54
   6   7  -1   28.41    2.26
   5   7  -1    4.50    0.42
   5   7  -1    3.58    0.40
   5   7  -1    3.45    0.56
   4   7  -1    0.65    0.15
   4   7  -1    0.80    0.13
   4   7  -1    0.75    0.14
   2   7  -1   36.16    3.14
   2   7  -1   37.86    3.17
   2   7  -1   37.62    2.81
   1   7  -1   16.13    1.40
   1   7  -1   16.12    1.39
   1   7  -1   15.85    1.24
  -1  -7   1   16.90    1.84
   0   7  -1    3.20    0.32
   0   7  -1    3.94    0.35
   0  -7   1    2.80    0.47
  -1   7  -1   12.41    1.05
  -1   7  -1   12.99    1.07
  -1   7  -1   12.34    0.95
   1  -7   1   11.21    1.39
  -2   7  -1    1.71    0.24
  -2   7  -1    1.49    0.19
  -2   7  -1    1.63    0.18
  -3   7  -1    5.25    0.53
  -3   7  -1    5.44    0.46
   3  -7   1    6.12    0.50
   3  -7   1    5.55    0.69
  -4   7  -1   12.07    0.90
  -4   7  -1   10.43    1.02
   4  -7   1   11.69    1.33
   4  -7   1   12.07    1.00
  -5   7  -1   18.71    1.76
  -5   7  -1   18.91    1.56
   5  -7   1   21.67    2.31
   5  -7   1   22.71    1.74
  -6   7  -1    2.16    0.30
  -6   7  -1    2.48    0.25
   6  -7   1    2.17    0.27
   6  -7   1    2.37    0.36
  -7   7  -1    0.56    0.14
  -7   7  -1    0.58    0.12
   7  -7   1    0.29    0.13
   7  -7   1    0.29    0.23
  -8   7  -1    0.98    0.16
  -8   7  -1    1.17    0.15
   8  -7   1    1.22    0.30
   8  -7   1    0.94    0.18
   9  -7   1    8.98    1.12
   9  -7   1    8.78    0.82
  10  -7   1    1.41    0.36
  10  -7   1    1.35    0.24
  11  -7   1    7.61    1.01
  11  -7   1    7.44    0.73
  12  -7   1    5.35    0.62
  12  -7   1    6.67    0.89
  13  -7   1    0.79    0.43
  13  -7   1    0.59    0.25
  14  -7   1   -0.04    0.46
  15  -7   1    0.18    0.52
  16  -7   1    0.60    0.60
  17  -7   1   -0.20    0.64
  15   6  -1   -0.56    0.64
  14   6  -1   -0.31    0.60
  14   6  -1    0.13    0.24
  13   6  -1    0.46    0.57
  13   6  -1    0.29    0.23
  12   6  -1    0.63    0.56
  12   6  -1    1.21    0.26
  11   6  -1    6.12    0.96
  11   6  -1    6.05    0.63
  10   6  -1    0.51    0.46
  10   6  -1    0.05    0.19
   9   6  -1    7.23    1.09
   9   6  -1    8.79    0.77
   7   6  -1    6.57    0.59
   7   6  -1    6.31    0.51
   7   6  -1    5.59    0.59
   6   6  -1    2.80    0.45
   6   6  -1    2.28    0.29
   6   6  -1    2.43    0.24
   6   6  -1    1.89    0.26
   5   6  -1    8.19    0.75
   5   6  -1    7.53    0.74
   5   6  -1    9.46    1.05
   4   6  -1   12.47    1.01
   4   6  -1   13.61    1.53
   4   6  -1   12.26    1.14
   4   6  -1   14.17    1.13
   3   6  -1    0.87    0.15
   3   6  -1    1.12    0.14
   3   6  -1    0.92    0.15
   2   6  -1    2.63    0.26
   2   6  -1    2.49    0.24
   2   6  -1    2.32    0.28
  -2  -6   1    2.21    0.39
   1   6  -1    4.40    0.38
   1   6  -1    5.58    0.44
  -1  -6   1    4.04    0.58
   0   6  -1    9.51    0.76
   0   6  -1    8.23    0.74
   0  -6   1    8.05    0.99
  -1   6  -1   22.06    1.70
  -1   6  -1   18.59    1.52
  -1   6  -1   18.40    1.72
   1  -6   1   21.34    2.24
  -2   6  -1    6.73    0.52
  -2   6  -1    6.27    0.58
  -3   6  -1   41.94    2.90
  -3   6  -1   41.28    3.26
   3  -6   1   37.71    4.26
   3  -6   1   32.81    3.22
  -4   6  -1   11.88    1.06
  -4   6  -1   12.63    0.94
   4  -6   1   12.16    1.04
   4  -6   1   11.97    1.39
   5  -6   1   10.67    1.29
   5  -6   1   11.56    0.96
  -6   6  -1    0.42    0.12
  -6   6  -1    0.36    0.10
   6  -6   1    0.34    0.20
   6  -6   1    0.33    0.11
  -7   6  -1    0.37    0.09
  -7   6  -1    0.24    0.11
   7  -6   1   -0.23    0.23
   7  -6   1   -0.18    0.11
  -8   6  -1    0.05    0.11
   8  -6   1   -0.08    0.11
   8  -6   1    0.02    0.24
   9  -6   1    2.41    0.30
   9  -6   1    2.91    0.45
  10  -6   1    0.15    0.15
  10  -6   1    0.15    0.28
  11  -6   1   21.10    2.34
  11  -6   1   19.35    1.75
  12  -6   1    6.74    0.73
  12  -6   1    8.42    1.04
  13  -6   1    0.06    0.23
  13  -6   1    0.07    0.42
  14  -6   1    0.28    0.48
  15  -6   1    0.37    0.54
  16  -6   1   -0.04    0.59
  17  -6   1   -0.77    0.66
  15   5  -1   -0.05    0.24
  15   5  -1   -0.27    0.64
  14   5  -1   -0.19    0.59
  14   5  -1    0.41    0.24
  13   5  -1    0.29    0.56
  13   5  -1    0.57    0.23
  12   5  -1    0.04    0.20
  12   5  -1    0.56    0.52
  11   5  -1    3.01    0.62
  11   5  -1    2.97    0.39
  10   5  -1    2.88    0.60
  10   5  -1    2.77    0.36
   9   5  -1    2.66    0.56
   9   5  -1    2.96    0.36
   8   5  -1   -0.03    0.14
   8   5  -1   -0.19    0.33
   7   5  -1    2.22    0.24
   7   5  -1    2.50    0.29
   6   5  -1    3.08    0.27
   6   5  -1    3.25    0.55
   6   5  -1    2.60    0.32
   6   5  -1    2.67    0.31
   5   5  -1   10.50    0.77
   5   5  -1   10.06    0.87
   5   5  -1   10.42    1.21
   5   5  -1    8.75    0.87
   4   5  -1   44.76    4.08
   4   5  -1   44.87    3.62
   4   5  -1   53.62    4.05
   4   5  -1   49.59    5.35
   3   5  -1   13.59    1.00
   3   5  -1   13.20    1.49
   3   5  -1   13.04    1.12
   3   5  -1   12.30    1.12
   2   5  -1    9.05    0.69
   2   5  -1    8.60    0.78
   2   5  -1    9.00    0.77
   1   5  -1   18.10    1.56
  -1  -5   1   23.13    2.29
   0   5  -1    0.56    0.10
   0   5  -1    0.87    0.10
   0   5  -1    0.88    0.11
   0  -5   1    1.21    0.20
  -1   5  -1   12.43    1.01
  -1   5  -1   11.91    0.91
  -1   5  -1   12.00    1.03
   1  -5   1   11.36    1.34
  -2   5  -1    0.19    0.08
  -2   5  -1    0.24    0.07
   2  -5   1    0.34    0.10
  -3   5  -1   23.16    1.85
  -3   5  -1   23.78    2.08
   3  -5   1   24.18    2.72
   3  -5   1   26.64    2.06
  -4   5  -1   17.26    1.54
  -4   5  -1   17.30    1.37
   4  -5   1   19.60    2.02
  -5   5  -1   56.04    4.00
  -5   5  -1   51.56    4.50
   5  -5   1   52.13    5.89
   5  -5   1   52.90    4.46
  -6   5  -1    7.07    0.63
  -6   5  -1    7.07    0.56
   6  -5   1    6.85    0.63
  -7   5  -1   11.57    1.01
  -7   5  -1   11.31    0.90
   7  -5   1   11.12    1.02
   7  -5   1   13.00    1.39
  -8   5  -1   17.08    1.29
   8  -5   1   14.48    1.30
   8  -5   1   12.95    1.72
  10  -5   1    1.36    0.23
  10  -5   1    1.54    0.37
  11  -5   1   18.40    2.00
  11  -5   1   15.70    1.48
  12  -5   1    3.14    0.42
  12  -5   1    4.16    0.67
  13  -5   1    1.46    0.52
  13  -5   1    2.01    0.32
  14  -5   1   -0.58    0.48
  14  -5   1   -0.10    0.20
  15  -5   1   -0.34    0.54
  16  -5   1   -0.46    0.60
  17  -5   1   -0.67    0.66
  16   4  -1   -0.07    0.69
  15   4  -1    0.87    0.27
  15   4  -1   -0.40    0.63
  14   4  -1    0.75    0.61
  14   4  -1    1.66    0.31
  13   4  -1    1.94    0.63
  13   4  -1    2.64    0.37
  12   4  -1    0.13    0.20
  12   4  -1    0.01    0.47
  11   4  -1    0.39    0.44
  11   4  -1    0.72    0.21
  10   4  -1    1.96    0.50
  10   4  -1    1.98    0.29
   9   4  -1    3.13    0.38
   8   4  -1    1.18    0.22
   8   4  -1    2.07    0.39
   7   4  -1    4.33    0.55
   7   4  -1    3.11    0.37
   7   4  -1    3.38    0.36
   6   4  -1    4.32    0.40
   6   4  -1    3.79    0.42
   6   4  -1    4.39    0.35
   6   4  -1    4.01    0.64
   5   4  -1   11.86    1.41
   5   4  -1   11.00    1.03
   5   4  -1   12.79    1.03
   4   4  -1   12.56    1.15
   4   4  -1   12.46    1.02
   4   4  -1   15.26    1.16
   4   4  -1   13.72    1.54
   3   4  -1    4.47    0.41
   2   4  -1    2.85    0.23
   2   4  -1    2.76    0.25
   2   4  -1    2.38    0.26
   1   4  -1   16.78    1.30
   1   4  -1   17.88    1.45
   1   4  -1   15.60    1.46
  -1  -4   1   18.60    1.92
   0   4  -1    7.60    0.59
   0   4  -1    5.90    0.60
   0   4  -1    6.45    0.53
   0  -4   1    7.39    0.78
  -1   4  -1   31.77    2.31
  -1   4  -1   30.94    2.60
  -1   4  -1   29.38    2.57
  -2   4  -1   10.19    0.89
  -2   4  -1   10.32    1.00
   2  -4   1   12.87    0.98
   2  -4   1   13.00    1.30
  -3   4  -1   22.45    1.76
  -3   4  -1   22.55    1.56
   3  -4   1   17.59    2.30
   3  -4   1   20.18    1.74
  -4   4  -1   11.27    0.84
  -4   4  -1    9.71    0.95
   4  -4   1   11.51    1.25
   4  -4   1   11.52    0.94
  -5   4  -1    1.34    0.13
  -5   4  -1    1.22    0.14
   5  -4   1    1.16    0.21
   5  -4   1    0.93    0.14
  -6   4  -1   40.94    3.48
   6  -4   1   43.64    3.46
   6  -4   1   38.71    4.57
   7  -4   1  122.86   13.06
   7  -4   1  113.46    9.89
   8  -4   1   90.41    8.02
   8  -4   1  101.08   10.60
   9  -4   1    8.92    1.01
   9  -4   1    6.79    0.71
  10  -4   1    0.05    0.15
  10  -4   1   -0.02    0.29
  11  -4   1    1.93    0.47
  11  -4   1    1.82    0.28
  12  -4   1   -0.32    0.19
  12  -4   1   -0.05    0.40
  13  -4   1    3.03    0.39
  13  -4   1    2.80    0.63
  14  -4   1    0.02    0.20
  14  -4   1   -0.35    0.52
  15  -4   1   -0.16    0.24
  15  -4   1   -0.98    0.54
  16  -4   1   -1.30    0.60
  17  -4   1   -0.81    0.65
  16   3  -1    0.02    0.65
  15   3  -1    1.47    0.64
  15   3  -1    1.83    0.33
  14   3  -1    0.95    0.26
  14   3  -1    0.88    0.58
  13   3  -1    1.56    0.29
  13   3  -1    1.53    0.57
  12   3  -1    1.09    0.24
  12   3  -1    1.68    0.50
  11   3  -1    0.50    0.20
  11   3  -1    0.43    0.42
  10   3  -1    1.61    0.27
  10   3  -1    2.48    0.46
   9   3  -1    5.69    0.97
   9   3  -1    8.23    0.68
   8   3  -1    2.80    0.44
   8   3  -1    2.06    0.30
   7   3  -1    1.43    0.31
   7   3  -1    0.66    0.16
   6   3  -1    1.04    0.13
   6   3  -1    0.78    0.27
   5   3  -1   13.02    0.97
   5   3  -1   10.99    1.31
   5   3  -1    9.54    0.98
   4   3  -1   21.33    1.92
   4   3  -1   22.04    1.71
   4   3  -1   24.81    2.54
   3   3  -1    0.92    0.12
   3   3  -1    0.98    0.13
   3   3  -1    1.19    0.12
   3   3  -1    1.08    0.21
   2   3  -1   24.03    2.02
   1   3  -1   45.05    3.42
  -1  -3   1   46.01    5.03
   0   3  -1    3.62    0.29
   0   3  -1    2.92    0.27
  -1   3  -1   72.94    5.31
  -1   3  -1   68.55    5.91
  -2   3  -1   51.46    4.42
   2  -3   1   66.28    4.92
  -3   3  -1  173.83   13.53
   3  -3   1  175.86   19.71
   3  -3   1  186.33   14.94
  -4   3  -1    4.77    0.38
   4  -3   1    4.62    0.42
   5  -3   1   39.18    3.44
   5  -3   1   42.76    4.55
   6  -3   1    2.43    0.37
   6  -3   1    2.53    0.27
   7  -3   1   66.77    7.26
   7  -3   1   64.10    5.49
   8  -3   1  112.53    9.54
   8  -3   1  115.21   12.60
   9  -3   1   32.64    2.90
   9  -3   1   35.87    3.85
  10  -3   1   -0.19    0.30
  10  -3   1   -0.01    0.15
  11  -3   1    1.52    0.25
  11  -3   1    1.02    0.43
  12  -3   1   -0.40    0.42
  12  -3   1    0.15    0.20
  13  -3   1    0.15    0.22
  13  -3   1   -0.13    0.48
  14  -3   1   -0.48    0.51
  14  -3   1   -0.31    0.21
  15  -3   1   -0.19    0.58
  15  -3   1    0.39    0.24
  16  -3   1   -0.89    0.60
  17  -3   1   -0.88    0.65
  16   2  -1    1.60    0.31
  16   2  -1    0.55    0.64
  15   2  -1    0.32    0.24
  15   2  -1    0.71    0.57
  14   2  -1    0.60    0.23
  14   2  -1    0.27    0.52
  13   2  -1    0.05    0.20
  13   2  -1   -0.14    0.45
  12   2  -1    5.22    0.57
  11   2  -1   17.00    2.03
  11   2  -1   17.16    1.50
  10   2  -1    1.19    0.41
  10   2  -1    1.42    0.24
   9   2  -1    1.65    0.39
   9   2  -1    1.55    0.24
   8   2  -1    7.67    0.77
   8   2  -1    9.48    1.07
   7   2  -1   19.77    2.25
   6   2  -1   15.36    1.32
   5   2  -1    5.14    0.48
   5   2  -1    5.21    0.66
   4   2  -1    4.74    0.66
   4   2  -1    6.12    0.49
   3   2  -1   29.90    2.50
   3   2  -1   29.56    3.30
   2   2  -1    0.92    0.10
   2   2  -1    1.11    0.12
   0   2  -1    7.98    0.66
   0   2  -1    7.77    0.60
  -1   2  -1   41.95    3.15
  -2   2  -1   12.88    1.04
   2  -2   1   14.72    1.16
  -3   2  -1   55.74    4.28
   3  -2   1   58.87    4.78
   3  -2   1   56.74    6.31
   4  -2   1  431.17   46.86
   4  -2   1  418.37   35.50
   5  -2   1   88.01    9.79
   5  -2   1   89.14    7.41
   6  -2   1   13.13    1.13
   7  -2   1    2.66    0.46
   8  -2   1   12.02    1.28
   8  -2   1    9.18    0.92
   9  -2   1   18.32    2.01
   9  -2   1   16.20    1.48
  10  -2   1    0.09    0.15
  10  -2   1    0.01    0.32
  11  -2   1    1.20    0.45
  11  -2   1    0.90    0.22
  12  -2   1   -0.38    0.19
  12  -2   1   -0.93    0.43
  13  -2   1    1.70    0.59
  13  -2   1    2.76    0.35
  14  -2   1    0.18    0.53
  14  -2   1    0.14    0.21
  15  -2   1   -0.89    0.55
  15  -2   1    0.06    0.22
  16  -2   1   -0.73    0.61
  16  -2   1    0.16    0.23
  17  -2   1   -0.33    0.66
  17   1  -1   -0.04    0.64
  16   1  -1    0.95    0.29
  16   1  -1    0.86    0.61
  15   1  -1    0.33    0.24
  15   1  -1    0.24    0.54
  14   1  -1   -0.17    0.20
  14   1  -1   -0.39    0.48
  13   1  -1    0.95    0.49
  13   1  -1    0.82    0.24
  12   1  -1    9.25    0.89
  12   1  -1    9.42    1.24
  11   1  -1   21.19    2.51
  11   1  -1   22.03    1.88
  10   1  -1    2.76    0.51
  10   1  -1    2.20    0.31
   9   1  -1    8.14    1.07
   9   1  -1    8.27    0.76
   7   1  -1   21.21    1.82
   6   1  -1    1.47    0.29
   4   1  -1  126.68    9.46
   4   1  -1   99.58   12.48
   3   1  -1    0.19    0.06
   3   1  -1    0.49    0.13
   2   1  -1    1.69    0.17
   1   1  -1  110.15    9.05
   1   1  -1  106.32    8.11
   0   1  -1    6.86    0.59
   0   1  -1    7.15    0.53
  -2   1  -1   26.71    2.06
   2  -1   1   28.14    2.30
   3  -1   1    0.08    0.04
   3  -1   1    0.12    0.09
   4  -1   1  398.92   34.51
   4  -1   1  426.96   45.52
   5  -1   1    9.03    1.03
   5  -1   1    8.59    0.76
   6  -1   1    9.17    0.78
   6  -1   1    8.61    1.06
   7  -1   1   17.52    1.91
   7  -1   1   15.77    1.42
   8  -1   1   47.31    3.99
   9  -1   1   39.07    4.39
  10  -1   1    1.52    0.41
  10  -1   1    1.30    0.23
  11  -1   1    1.47    0.25
  11  -1   1    1.04    0.46
  12  -1   1    0.61    0.49
  12  -1   1    0.63    0.23
  13  -1   1    1.32    0.26
  13  -1   1    0.69    0.51
  14  -1   1   -0.01    0.19
  14  -1   1   -0.46    0.52
  15  -1   1   -0.64    0.56
  15  -1   1    0.23    0.21
  16  -1   1    0.19    0.63
  16  -1   1    0.93    0.27
  17  -1   1    0.02    0.66
  17   0  -1    0.52    0.65
  16   0  -1    0.04    0.58
  16   0  -1    0.39    0.26
  15   0  -1   -0.43    0.52
  15   0  -1    0.24    0.24
  14   0  -1   -0.16    0.48
  14   0  -1    0.32    0.23
  13   0  -1    0.03    0.45
  13   0  -1    0.36    0.22
  12   0  -1    0.79    0.45
  12   0  -1    0.15    0.21
  11   0  -1    5.23    0.82
  11   0  -1    5.60    0.57
  10   0  -1    0.47    0.18
  10   0  -1    0.47    0.37
   9   0  -1   18.60    1.55
   9   0  -1   17.08    2.08
   8   0  -1    5.64    0.56
   7   0  -1   17.34    1.49
   6   0  -1    3.32    0.38
   6   0  -1    4.75    0.57
   4   0  -1 1000.00   73.76
   4   0  -1  766.16   97.28
   3   0  -1    3.00    0.28
   2   0  -1   38.12    3.19
   1   0  -1   97.05    7.88
  -1   0   1   91.57    7.07
   0   0  -1    5.61    0.47
   0   0   1    5.50    0.42
   1   0   1  190.35   14.35
   1   0   1  192.71   16.00
   2   0   1   10.28    0.77
   2   0   1   10.17    0.86
   3   0   1    2.25    0.32
   3   0   1    2.57    0.23
   5   0   1    3.11    0.31
   6   0   1    2.70    0.38
   6   0   1    1.83    0.25
   7   0   1   10.74    0.95
   8   0   1   28.46    2.42
   9   0   1    8.26    1.07
   9   0   1    7.78    0.73
  10   0   1    1.69    0.44
  10   0   1    1.32    0.23
  11   0   1   19.01    2.42
  11   0   1   21.95    1.79
  12   0   1    0.58    0.21
  12   0   1    1.28    0.50
  13   0   1    0.16    0.18
  13   0   1   -0.06    0.49
  14   0   1    0.06    0.19
  14   0   1   -0.25    0.52
  15   0   1    0.30    0.22
  15   0   1   -0.24    0.56
  16   0   1   -0.60    0.60
  16   0   1    0.18    0.22
  17   0   1    0.46    0.67
  17  -1  -1    0.20    0.26
  17  -1  -1   -0.48    0.60
  16  -1  -1    0.15    0.61
  16  -1  -1    2.74    0.38
  15  -1  -1   -0.27    0.52
  15  -1  -1   -0.33    0.22
  14  -1  -1   -0.44    0.49
  14  -1  -1    0.34    0.24
  13  -1  -1    1.01    0.51
  13  -1  -1    1.41    0.29
  12  -1  -1    0.61    0.24
  12  -1  -1    0.13    0.44
  11  -1  -1    1.50    0.26
  11  -1  -1    1.70    0.46
  10  -1  -1    1.46    0.25
  10  -1  -1    1.33    0.42
   9  -1  -1   26.47    2.03
   9  -1  -1   20.52    2.69
   8  -1  -1    4.29    0.46
   7  -1  -1    5.89    0.70
   7  -1  -1    4.28    0.48
   6  -1  -1    9.41    0.87
   6  -1  -1   10.64    1.17
   5  -1  -1   44.34    3.65
   5  -1  -1   42.42    4.81
   4  -1  -1  706.81   79.24
   4  -1  -1  730.84   60.07
   3  -1  -1    8.86    0.76
   2  -1  -1   26.78    2.25
   1  -1  -1    8.91    0.75
  -1   1   1    8.93    0.67
   0   1   1    0.30    0.04
   0   1   1    0.38    0.04
   1   1   1   30.98    2.38
   1   1   1   32.42    2.65
   2   1   1    0.15    0.04
   2   1   1    0.18    0.04
   3   1   1   15.74    1.80
   3   1   1   16.31    1.35
   4   1   1    3.44    0.29
   4   1   1    2.23    0.44
   5   1   1    0.39    0.21
   5   1   1    0.33    0.09
   6   1   1   39.45    4.84
   6   1   1   47.56    3.67
   8   1   1   15.99    1.46
   8   1   1   18.06    1.99
   9   1   1    4.62    0.74
   9   1   1    4.13    0.44
  10   1   1    0.09    0.14
  10   1   1   -0.46    0.35
  11   1   1   24.45    2.04
  11   1   1   22.83    2.76
  12   1   1    0.59    0.20
  12   1   1    1.65    0.50
  13   1   1    0.44    0.19
  13   1   1   -0.06    0.48
  14   1   1   -0.77    0.51
  14   1   1    0.23    0.20
  15   1   1    0.18    0.58
  15   1   1    0.31    0.22
  16   1   1    0.62    0.62
  17   1   1    0.09    0.66
  17  -2  -1    0.67    0.31
  17  -2  -1   -0.59    0.61
  16  -2  -1   -0.84    0.56
  16  -2  -1   -0.11    0.25
  15  -2  -1   -0.20    0.54
  15  -2  -1    0.22    0.26
  14  -2  -1    0.50    0.53
  14  -2  -1    1.34    0.30
  13  -2  -1   -0.02    0.46
  13  -2  -1    0.17    0.20
  12  -2  -1   -0.67    0.41
  12  -2  -1   -0.29    0.20
  11  -2  -1   -0.06    0.18
  11  -2  -1   -0.35    0.36
  10  -2  -1    1.33    0.24
  10  -2  -1    1.52    0.41
   9  -2  -1   18.59    1.64
   9  -2  -1   19.38    2.19
   8  -2  -1   59.98    6.54
   8  -2  -1   57.76    4.96
   7  -2  -1   17.78    1.53
   6  -2  -1    3.55    0.49
   6  -2  -1    3.48    0.36
   5  -2  -1   74.38    8.45
   5  -2  -1   78.56    6.41
   4  -2  -1   96.30    8.12
   4  -2  -1   97.77   10.71
   3  -2  -1  198.50   16.58
   1  -2  -1   28.13    2.18
  -1   2   1   23.96    1.96
   0   2   1    5.28    0.44
   0   2   1    6.17    0.49
   1   2   1   67.63    4.94
   1   2   1   64.10    5.51
   2   2   1   13.83    1.26
   2   2   1   16.04    1.13
   3   2   1    4.82    0.41
   3   2   1    4.21    0.56
   4   2   1   14.50    1.12
   4   2   1   11.85    0.99
   5   2   1    9.39    1.06
   5   2   1    8.34    0.77
   6   2   1    6.77    0.54
   6   2   1    5.22    0.52
   6   2   1    5.49    0.79
   7   2   1    3.11    0.46
   7   2   1    2.64    0.32
   8   2   1    0.12    0.28
   8   2   1    0.13    0.12
   9   2   1    2.54    0.30
   9   2   1    1.53    0.43
  10   2   1    0.33    0.37
  10   2   1    0.20    0.15
  11   2   1    9.13    0.83
  11   2   1    8.30    1.20
  12   2   1    1.24    0.49
  12   2   1    0.65    0.21
  13   2   1    0.49    0.52
  13   2   1    1.47    0.26
  14   2   1   -0.22    0.53
  14   2   1   -0.02    0.20
  15   2   1    0.04    0.56
  15   2   1    0.29    0.22
  16   2   1    0.50    0.26
  16   2   1    0.03    0.63
  17  -3  -1   -0.18    0.28
  17  -3  -1   -1.04    0.60
  16  -3  -1   -0.18    0.25
  16  -3  -1   -0.75    0.57
  15  -3  -1   -0.23    0.53
  15  -3  -1    0.02    0.22
  14  -3  -1    1.13    0.28
  14  -3  -1    0.96    0.55
  13  -3  -1    0.30    0.23
  13  -3  -1   -0.31    0.46
  12  -3  -1    0.06    0.21
  12  -3  -1    0.09    0.42
  11  -3  -1    0.90    0.42
  11  -3  -1    1.86    0.27
  10  -3  -1    2.12    0.30
  10  -3  -1    2.26    0.46
   9  -3  -1   15.93    1.40
   9  -3  -1   16.22    1.87
   8  -3  -1  120.09   10.30
   8  -3  -1  125.70   13.59
   7  -3  -1  126.78   13.71
   7  -3  -1  121.49   10.40
   6  -3  -1    1.86    0.23
   6  -3  -1    2.27    0.31
   5  -3  -1    7.81    0.70
   5  -3  -1    8.03    0.93
   4  -3  -1    4.25    0.39
   4  -3  -1    4.55    0.54
  -4   3   1    4.24    0.34
   3  -3  -1   70.09    6.63
  -3   3   1   88.33    5.94
   2  -3  -1  126.36   10.13
  -2   3   1  116.15    9.09
  -1   3   1   41.06    3.70
  -1   3   1   46.55    3.29
   0   3   1    0.48    0.06
   0   3   1    0.41    0.06
   0   3   1    0.36    0.07
   1   3   1   25.85    1.96
   1   3   1   27.00    2.19
   1   3   1   25.23    2.21
   2   3   1    5.53    0.71
   2   3   1    6.82    0.53
   2   3   1    5.36    0.53
   2   3   1    6.56    0.47
   3   3   1    8.14    0.94
   4   3   1   20.24    1.44
   4   3   1   17.79    2.14
   5   3   1   10.17    0.95
   5   3   1   12.13    0.85
   5   3   1   11.11    0.95
   5   3   1   10.51    1.30
   6   3   1    0.40    0.08
   6   3   1    0.31    0.12
   6   3   1    0.39    0.10
   6   3   1    0.25    0.25
   7   3   1    2.10    0.39
   7   3   1    1.65    0.23
   7   3   1    1.79    0.24
   8   3   1    0.14    0.12
   8   3   1    0.01    0.28
   9   3   1    8.74    0.77
   9   3   1    7.78    1.11
  10   3   1    1.38    0.25
  10   3   1    1.78    0.45
  11   3   1    0.02    0.41
  11   3   1    0.45    0.18
  12   3   1   -0.10    0.17
  12   3   1   -0.77    0.44
  13   3   1    3.50    0.44
  13   3   1    3.40    0.72
  14   3   1    0.91    0.26
  14   3   1    0.70    0.58
  15   3   1    0.43    0.61
  15   3   1    0.48    0.25
  16   3   1    0.02    0.65
  16   3   1    0.10    0.25
  17  -4  -1    0.17    0.64
  17  -4  -1    0.39    0.29
  16  -4  -1   -0.61    0.57
  16  -4  -1   -0.26    0.23
  15  -4  -1    0.28    0.24
  15  -4  -1   -0.59    0.55
  14  -4  -1    0.45    0.23
  14  -4  -1   -0.14    0.52
  13  -4  -1    1.76    0.31
  13  -4  -1    0.56    0.49
  12  -4  -1    0.41    0.23
  12  -4  -1    0.50    0.43
  11  -4  -1    4.59    0.51
  11  -4  -1    4.82    0.78
  10  -4  -1    0.04    0.15
  10  -4  -1    0.03    0.31
   9  -4  -1    7.69    1.10
   9  -4  -1    9.74    0.81
   8  -4  -1   42.79    4.60
   8  -4  -1   39.51    3.48
   7  -4  -1   53.36    5.53
   7  -4  -1   46.05    4.19
   6  -4  -1   32.30    2.84
   6  -4  -1   31.21    3.74
  -6   4   1   37.13    2.85
   5  -4  -1   27.45    2.90
   5  -4  -1   26.82    2.20
  -5   4   1   24.43    2.21
  -5   4   1   25.45    1.96
   4  -4  -1   21.41    2.35
   4  -4  -1   23.66    1.79
  -4   4   1   19.90    1.59
  -4   4   1   19.47    1.79
   3  -4  -1    0.61    0.09
   3  -4  -1    0.52    0.13
  -3   4   1    0.84    0.10
  -2   4   1    2.26    0.20
  -1   4   1   20.74    1.54
  -1   4   1   20.17    1.74
   0   4   1    0.13    0.05
   0   4   1    0.10    0.06
   0   4   1    0.10    0.05
   1   4   1   11.65    0.91
   1   4   1   12.19    1.02
   2   4   1    1.17    0.12
   2   4   1    1.01    0.13
   2   4   1    1.09    0.22
   2   4   1    1.17    0.14
   3   4   1   37.41    2.79
   3   4   1   37.96    4.11
   3   4   1   35.74    3.14
   4   4   1   14.91    1.25
   4   4   1   15.07    1.26
   4   4   1   13.98    1.12
   4   4   1   14.56    1.67
   5   4   1    1.92    0.24
   5   4   1    2.69    0.21
   5   4   1    1.09    0.35
   6   4   1    2.17    0.24
   6   4   1    2.32    0.28
   6   4   1    2.15    0.28
   6   4   1    3.25    0.42
   7   4   1    1.82    0.22
   7   4   1    2.03    0.41
   7   4   1    2.05    0.20
   7   4   1    1.85    0.25
   8   4   1    0.32    0.32
   8   4   1   -0.04    0.12
   9   4   1    7.44    1.02
   9   4   1    7.02    0.68
  10   4   1    3.34    0.59
  10   4   1    3.05    0.39
  11   4   1    1.51    0.27
  11   4   1    1.48    0.50
  12   4   1    1.92    0.60
  12   4   1    2.11    0.33
  13   4   1    0.75    0.25
  13   4   1    0.55    0.54
  14   4   1    0.19    0.58
  14   4   1    0.96    0.27
  15   4   1    0.05    0.63
  15   4   1    0.32    0.24
  16   4   1   -0.59    0.68
  17  -5  -1   -1.05    0.60
  16  -5  -1    2.59    0.39
  16  -5  -1   -0.04    0.62
  15  -5  -1   -0.05    0.23
  15  -5  -1   -0.53    0.54
  14  -5  -1   -0.49    0.48
  14  -5  -1    0.23    0.25
  13  -5  -1   -0.20    0.44
  13  -5  -1    0.15    0.23
  12  -5  -1   12.78    1.47
  12  -5  -1   10.69    1.07
  11  -5  -1   20.87    2.31
  11  -5  -1   18.93    1.73
  10  -5  -1   -0.01    0.16
  10  -5  -1   -0.24    0.28
   9  -5  -1    1.04    0.19
   9  -5  -1    1.19    0.31
   8  -5  -1    5.30    0.69
   8  -5  -1    4.18    0.48
   7  -5  -1    2.49    0.29
   7  -5  -1    3.15    0.39
  -7   5   1    2.04    0.27
   6  -5  -1    1.36    0.20
   6  -5  -1    1.56    0.26
  -6   5   1    1.76    0.16
  -6   5   1    1.42    0.17
   5  -5  -1   33.20    2.66
   5  -5  -1   31.88    3.51
  -5   5   1   30.09    2.68
  -5   5   1   31.03    2.38
   4  -5  -1   11.26    1.30
   4  -5  -1   12.89    0.99
  -4   5   1   11.17    0.99
  -4   5   1   10.48    0.88
   3  -5  -1   37.85    4.23
   3  -5  -1   40.68    3.21
  -3   5   1   37.38    3.24
  -3   5   1   37.03    2.88
   2  -5  -1    7.56    0.89
   2  -5  -1    8.81    0.68
  -2   5   1    7.65    0.61
  -2   5   1    7.31    0.69
   1  -5  -1   29.62    3.17
  -1   5   1   28.70    2.41
  -1   5   1   28.37    2.16
  -1   5   1   27.93    2.44
   0   5   1   16.05    1.26
   0   5   1   16.27    1.41
   0   5   1   17.21    1.40
  -1  -5  -1   19.48    2.31
   1   5   1   21.17    1.57
   1   5   1   21.50    1.77
   2   5   1    7.35    0.61
   2   5   1    6.84    0.60
   2   5   1    6.08    0.80
   3   5   1    4.90    0.41
   3   5   1    5.37    0.65
   4   5   1   12.57    1.05
   4   5   1   11.92    0.94
   4   5   1   11.95    1.06
   5   5   1   14.49    1.33
   5   5   1   16.54    1.19
   5   5   1   15.47    1.34
   6   5   1    5.99    0.59
   6   5   1    6.55    0.86
   6   5   1    6.93    0.58
   6   5   1    5.75    0.51
   7   5   1    0.43    0.13
   7   5   1    0.06    0.12
   7   5   1    0.11    0.32
   8   5   1    1.56    0.18
   8   5   1    0.91    0.41
   8   5   1    1.13    0.21
   9   5   1    3.85    0.41
   9   5   1    3.03    0.61
  10   5   1    0.09    0.44
  10   5   1    0.14    0.18
  11   5   1    5.13    0.51
  11   5   1    3.60    0.75
  12   5   1    1.03    0.57
  12   5   1    1.88    0.31
  13   5   1    4.30    0.52
  14   5   1    0.00    0.62
  14   5   1    0.21    0.23
  15   5   1    0.29    0.67
  17  -6  -1   -0.08    0.65
  16  -6  -1   -0.04    0.60
  16  -6  -1    0.54    0.29
  15  -6  -1    0.75    0.28
  15  -6  -1    0.10    0.55
  14  -6  -1   -0.10    0.48
  14  -6  -1    0.21    0.26
  13  -6  -1    0.85    0.48
  13  -6  -1    1.47    0.30
  12  -6  -1   10.51    1.32
  12  -6  -1   10.16    0.98
  11  -6  -1   16.42    1.88
  11  -6  -1   15.29    1.41
  10  -6  -1   -0.13    0.27
  10  -6  -1   -0.03    0.17
   9  -6  -1    5.27    0.79
   9  -6  -1    5.87    0.57
   7  -6  -1    0.60    0.14
  -7   6   1    0.49    0.11
   6  -6  -1    4.91    0.45
   6  -6  -1    4.68    0.62
  -6   6   1    4.53    0.39
  -6   6   1    4.23    0.45
   5  -6  -1    6.14    0.55
  -5   6   1    6.37    0.49
  -5   6   1    5.32    0.55
   4  -6  -1   43.99    3.57
   4  -6  -1   40.58    4.70
  -4   6   1   42.04    3.20
  -4   6   1   43.30    3.60
  -3   6   1   19.82    1.35
  -3   6   1   15.67    1.52
   2  -6  -1    1.83    0.27
   2  -6  -1    1.68    0.20
  -2   6   1    1.82    0.19
   1  -6  -1    4.72    0.64
  -1   6   1    5.38    0.44
  -1   6   1    5.43    0.50
  -1   6   1    5.75    0.48
   0   6   1    4.50    0.39
   0   6   1    4.39    0.44
   0   6   1    4.85    0.42
  -1  -6  -1   10.73    1.30
   1   6   1   11.81    0.89
   1   6   1   11.95    1.00
   1   6   1   11.41    0.99
  -2  -6  -1    7.93    0.97
   2   6   1    7.93    0.74
   2   6   1    8.76    0.65
   2   6   1    8.42    0.73
   3   6   1    4.89    0.51
   3   6   1    5.40    0.45
   3   6   1    6.48    0.74
   4   6   1    1.10    0.17
   4   6   1    1.16    0.15
   4   6   1    0.99    0.16
   4   6   1    1.19    0.32
   5   6   1    7.06    0.65
   5   6   1    6.38    0.63
   5   6   1    7.60    0.57
   6   6   1    3.01    0.29
   6   6   1    2.07    0.26
   6   6   1    1.99    0.26
   7   6   1   12.35    1.14
   7   6   1   12.52    1.15
   7   6   1   14.14    1.01
   7   6   1   12.71    1.55
   8   6   1   -0.05    0.13
   8   6   1   -0.38    0.38
   8   6   1   -0.01    0.15
   9   6   1    2.65    0.57
  10   6   1    2.47    0.58
  11   6   1    3.39    0.41
  11   6   1    1.51    0.62
  12   6   1    0.38    0.55
  12   6   1   -0.06    0.21
  13   6   1    0.02    0.60
  13   6   1    1.25    0.28
  14   6   1    0.42    0.64
  14   6   1    0.36    0.25
  15   6   1    0.16    0.70
  17  -7  -1    0.64    0.66
  16  -7  -1    0.27    0.59
  15  -7  -1    1.68    0.36
  15  -7  -1    0.99    0.56
  14  -7  -1    1.12    0.31
  14  -7  -1    0.45    0.49
  13  -7  -1    0.28    0.25
  13  -7  -1   -0.08    0.42
  12  -7  -1    4.20    0.53
  12  -7  -1    4.21    0.74
  11  -7  -1    0.74    0.25
  11  -7  -1    0.36    0.33
  10  -7  -1   11.55    1.10
  10  -7  -1   12.65    1.47
   9  -7  -1    4.12    0.60
   9  -7  -1    4.20    0.46
   8  -7  -1    1.72    0.35
   8  -7  -1    1.67    0.27
  -8   7   1    2.32    0.24
  -8   7   1    2.51    0.28
   7  -7  -1    2.73    0.31
   7  -7  -1    2.70    0.40
  -7   7   1    2.34    0.28
  -7   7   1    2.93    0.26
   6  -7  -1    3.56    0.36
   6  -7  -1    4.07    0.52
  -6   7   1    3.17    0.38
  -6   7   1    3.05    0.32
   5  -7  -1   21.43    1.79
   5  -7  -1   23.64    2.36
  -5   7   1   19.77    1.60
  -5   7   1   19.40    1.81
   4  -7  -1   11.80    1.03
   4  -7  -1   11.17    1.36
  -4   7   1   12.47    1.05
  -4   7   1   12.39    0.93
   3  -7  -1    0.07    0.09
   3  -7  -1    0.21    0.14
  -3   7   1    0.40    0.11
  -3   7   1    0.67    0.13
   2  -7  -1   32.71    2.68
   2  -7  -1   33.00    3.53
  -2   7   1   31.78    2.40
  -2   7   1   29.55    2.71
  -1   7   1   21.61    1.72
  -1   7   1   20.69    1.53
  -1   7   1   17.84    1.69
   0  -7  -1    0.29    0.15
   0   7   1    0.30    0.10
   0   7   1    0.17    0.10
   0   7   1    0.30    0.12
  -1  -7  -1    3.73    0.50
   1   7   1    3.57    0.40
   1   7   1    4.35    0.38
   1   7   1    3.63    0.34
   2   7   1   25.61    1.98
   2   7   1   20.65    1.96
   3   7   1   29.16    2.06
   3   7   1   25.10    2.32
   4   7   1    5.79    0.78
   4   7   1    6.70    0.58
   4   7   1    6.07    0.51
   4   7   1    6.13    0.59
   5   7   1    0.19    0.12
   5   7   1    0.18    0.32
   5   7   1    0.28    0.13
   5   7   1    0.16    0.14
   6   7   1    5.09    0.73
   6   7   1    4.96    0.43
   6   7   1    4.71    0.51
   6   7   1    4.18    0.47
   7   7   1    6.81    0.68
   7   7   1    6.80    0.65
   7   7   1    6.98    0.94
   8   7   1    0.77    0.44
   8   7   1    0.30    0.16
   8   7   1    0.15    0.14
   9   7   1    0.21    0.47
   9   7   1    1.33    0.23
  10   7   1    0.84    0.54
  10   7   1    1.71    0.29
  11   7   1    0.72    0.23
  11   7   1   -0.13    0.54
  12   7   1   -0.23    0.56
  12   7   1    0.34    0.24
  13   7   1   -0.17    0.60
  13   7   1    0.12    0.24
  14   7   1    0.00    0.66
  16  -8  -1    0.45    0.60
  15  -8  -1    0.55    0.54
  15  -8  -1    1.25    0.34
  14  -8  -1    0.74    0.51
  14  -8  -1    1.38    0.33
  13  -8  -1    0.97    0.30
  13  -8  -1    0.77    0.43
  12  -8  -1    0.29    0.36
  12  -8  -1    0.21    0.25
  11  -8  -1    0.22    0.23
  11  -8  -1    0.14    0.32
  10  -8  -1    0.15    0.21
  10  -8  -1    0.10    0.28
   9  -8  -1    2.99    0.39
   9  -8  -1    2.65    0.46
   8  -8  -1    0.03    0.15
   8  -8  -1    0.19    0.24
  -8   8   1   -0.02    0.14
  -8   8   1   -0.03    0.11
   7  -8  -1    5.92    0.52
   7  -8  -1    6.37    0.72
  -7   8   1    4.63    0.45
  -7   8   1    4.24    0.53
   6  -8  -1    2.18    0.34
  -6   8   1    2.60    0.28
  -6   8   1    2.20    0.24
   5  -8  -1   14.87    1.23
   5  -8  -1   15.38    1.63
  -5   8   1   13.32    1.25
  -5   8   1   13.55    1.10
   4  -8  -1    0.63    0.13
   4  -8  -1    0.76    0.18
  -4   8   1    0.80    0.16
  -4   8   1    0.85    0.15
   3  -8  -1   10.66    1.16
   3  -8  -1   10.39    0.88
  -3   8   1    9.52    0.79
  -3   8   1    9.53    0.90
   2  -8  -1   56.57    5.94
  -2   8   1   52.22    4.04
  -2   8   1   52.10    4.55
   1  -8  -1    0.34    0.18
  -1   8   1    0.70    0.12
  -1   8   1    1.21    0.17
  -1   8   1    0.96    0.14
   0  -8  -1    2.89    0.42
   0   8   1    2.66    0.28
   0   8   1    2.69    0.29
   0   8   1    2.49    0.33
  -1  -8  -1    1.42    0.24
   1   8   1    1.23    0.18
   1   8   1    1.41    0.20
   1   8   1    1.31    0.17
   2   8   1    3.28    0.36
  -3  -8  -1   16.37    1.83
   3   8   1   15.83    1.24
   3   8   1   16.04    1.40
   4   8   1    0.32    0.16
   4   8   1    0.16    0.12
   4   8   1    0.17    0.12
   5   8   1   -0.02    0.13
   6   8   1    8.50    0.78
   6   8   1    7.97    0.67
   6   8   1    8.13    0.75
   6   8   1    7.87    1.06
   8   8   1    2.83    0.36
   8   8   1    1.99    0.58
   8   8   1    3.21    0.32
   9   8   1    2.05    0.58
  10   8   1    0.70    0.24
  10   8   1    1.00    0.57
  11   8   1    0.48    0.59
  12   8   1    0.78    0.27
  12   8   1    0.44    0.62
  13   8   1    0.78    0.69
  14  -9  -1    1.90    0.36
  14  -9  -1    0.82    0.51
  13  -9  -1    1.34    0.32
  13  -9  -1    0.38    0.41
  12  -9  -1    0.15    0.36
  12  -9  -1    0.23    0.27
  11  -9  -1    1.66    0.40
  10  -9  -1   -0.07    0.21
  10  -9  -1   -0.13    0.29
   9  -9  -1    8.76    1.04
   9  -9  -1    7.06    0.75
   8  -9  -1    6.73    0.85
   8  -9  -1    5.56    0.60
  -8   9   1    5.96    0.52
  -8   9   1    6.37    0.61
   7  -9  -1   11.88    1.14
   7  -9  -1   14.73    1.50
  -7   9   1   12.13    1.01
   6  -9  -1   29.87    2.41
   6  -9  -1   29.13    3.18
  -6   9   1   27.79    2.44
  -6   9   1   26.68    2.16
   5  -9  -1    0.59    0.14
   5  -9  -1    0.59    0.20
  -5   9   1    0.63    0.17
  -5   9   1    0.79    0.15
   4  -9  -1   10.74    1.24
   4  -9  -1   10.96    0.93
  -4   9   1   10.78    0.96
  -4   9   1   10.05    0.84
   2  -9  -1    0.30    0.16
  -2   9   1    0.17    0.15
  -2   9   1    0.14    0.12
  -1   9   1    4.40    0.46
  -1   9   1    4.14    0.39
  -1   9   1    4.30    0.41
   0  -9  -1    3.34    0.49
   0   9   1    2.80    0.32
   0   9   1    3.59    0.34
   0   9   1    3.29    0.38
  -1  -9  -1    9.51    1.27
   1   9   1    9.97    0.95
   1   9   1   11.77    0.86
   1   9   1   12.43    0.98
  -2  -9  -1    2.59    0.34
   2   9   1    2.15    0.25
   2   9   1    2.04    0.28
   2   9   1    1.79    0.27
  -3  -9  -1    4.96    0.66
   3   9   1    4.43    0.43
   3   9   1    5.08    0.52
   3   9   1    5.17    0.48
  -4  -9  -1    0.76    0.26
   4   9   1    0.90    0.18
   4   9   1    1.17    0.17
   4   9   1    1.01    0.21
   5   9   1    3.30    0.41
   5   9   1    4.31    0.48
   5   9   1    4.44    0.39
   6   9   1   -0.11    0.19
   6   9   1   -0.15    0.15
   6   9   1   -0.33    0.14
   7   9   1    0.36    0.40
   7   9   1    0.69    0.20
   7   9   1    0.43    0.21
   8   9   1    0.75    0.22
   8   9   1    1.17    0.51
   9   9   1    0.93    0.54
  10   9   1    1.91    0.32
  10   9   1    1.63    0.61
  11   9   1    0.50    0.59
  11   9   1    0.09    0.22
  12   9   1    0.30    0.63
  12   9   1    0.05    0.23
  13   9   1    0.52    0.69
  13 -10  -1    2.35    0.42
  12 -10  -1    4.72    0.60
  11 -10  -1    6.25    0.98
  11 -10  -1    8.87    0.78
  10 -10  -1    0.47    0.24
  10 -10  -1    0.38    0.32
   9 -10  -1    5.89    0.83
   9 -10  -1    5.60    0.60
   8 -10  -1    0.86    0.22
   8 -10  -1    0.76    0.30
  -8  10   1    0.83    0.21
  -8  10   1    1.11    0.18
   7 -10  -1    4.26    0.47
   7 -10  -1    5.55    0.69
  -7  10   1    3.94    0.51
  -7  10   1    4.23    0.42
   6 -10  -1    2.31    0.39
   6 -10  -1    2.07    0.29
  -6  10   1    2.76    0.29
  -6  10   1    2.65    0.32
   5 -10  -1    1.03    0.25
   5 -10  -1    0.93    0.18
  -5  10   1    0.89    0.18
  -5  10   1    0.75    0.21
   4 -10  -1    3.53    0.54
   4 -10  -1    3.89    0.37
  -4  10   1    3.04    0.44
  -4  10   1    3.34    0.36
   2 -10  -1    1.84    0.30
  -2  10   1    1.90    0.24
  -2  10   1    1.60    0.27
   1 -10  -1   10.13    1.12
  -1  10   1    9.55    0.84
  -1  10   1    8.91    0.76
  -1  10   1    9.16    0.88
   0 -10  -1    3.82    0.52
   0  10   1    2.94    0.34
   0  10   1    3.86    0.40
   0  10   1    3.28    0.36
   1  10   1   10.90    0.86
   1  10   1   11.57    0.98
   1  10   1    9.81    0.94
  -2 -10  -1    3.81    0.58
   2  10   1    4.08    0.40
   2  10   1    3.59    0.37
   2  10   1    3.67    0.46
  -3 -10  -1    5.89    0.75
   3  10   1    5.92    0.52
  -4 -10  -1    2.11    0.33
   4  10   1    0.92    0.25
   4  10   1    1.42    0.23
   4  10   1    1.09    0.21
  -5 -10  -1    0.56    0.26
   5  10   1    0.13    0.16
   5  10   1    0.12    0.16
   5  10   1    0.15    0.20
  -6 -10  -1    3.61    0.59
   6  10   1    3.69    0.41
   6  10   1    3.73    0.49
   6  10   1    3.12    0.37
   7  10   1   -0.05    0.22
   7  10   1    0.43    0.19
   7  10   1    0.21    0.18
   8  10   1    2.15    0.32
   9  10   1    0.80    0.25
  10  10   1    0.66    0.24
  10  10   1    0.29    0.51
  11  10   1    0.35    0.54
  11  10   1   -0.04    0.22
  12  10   1    0.47    0.60
  13 -11  -1    1.94    0.41
  12 -11  -1    0.40    0.30
  11 -11  -1    2.31    0.39
  10 -11  -1    0.12    0.24
   9 -11  -1    1.46    0.28
   8 -11  -1   -0.06    0.26
   8 -11  -1   -0.06    0.18
  -8  11   1   -0.20    0.19
  -8  11   1    0.05    0.16
   7 -11  -1    3.50    0.40
   7 -11  -1    3.40    0.62
  -7  11   1    3.64    0.41
  -7  11   1    2.92    0.36
   6 -11  -1    1.16    0.22
   6 -11  -1    1.42    0.31
  -6  11   1    1.51    0.22
  -6  11   1    1.51    0.27
   5 -11  -1    9.48    1.00
   5 -11  -1    8.10    0.73
  -5  11   1    7.15    0.78
  -5  11   1    7.13    0.67
   4 -11  -1    7.48    0.66
   4 -11  -1    7.72    0.90
  -4  11   1    6.36    0.61
  -4  11   1    6.69    0.71
   3 -11  -1    3.06    0.42
   3 -11  -1    2.52    0.32
   2 -11  -1    2.69    0.52
  -2  11   1    3.75    0.36
  -2  11   1    3.22    0.39
  -1  11   1    9.30    0.88
  -1  11   1    9.75    0.79
  -1  11   1   10.58    0.92
   0 -11  -1    3.41    0.42
   0  11   1    2.53    0.35
   0  11   1    2.35    0.29
   0  11   1    2.51    0.32
  -1 -11  -1    1.28    0.28
   1  11   1    1.54    0.21
   1  11   1    1.07    0.23
  -2 -11  -1    0.09    0.22
   2  11   1    0.13    0.13
   2  11   1    0.05    0.18
   2  11   1    0.15    0.15
  -3 -11  -1    0.59    0.23
   3  11   1    0.16    0.16
   3  11   1    0.23    0.16
   3  11   1    0.18    0.20
  -4 -11  -1    0.31    0.24
   4  11   1   -0.20    0.20
   4  11   1   -0.04    0.16
   4  11   1    0.31    0.17
  -5 -11  -1    0.26    0.27
   5  11   1   -0.06    0.16
   5  11   1    0.13    0.17
   5  11   1    0.02    0.22
  -6 -11  -1    2.49    0.45
   6  11   1    2.54    0.31
   6  11   1    1.60    0.34
   6  11   1    2.83    0.34
  -7 -11  -1    0.49    0.31
   7  11   1    0.31    0.19
   7  11   1    0.50    0.25
   7  11   1    0.38    0.20
  -8 -11  -1    0.27    0.31
   8  11   1    0.49    0.21
   9  11   1    1.97    0.33
  10  11   1    0.61    0.25
  12 -12  -1    0.02    0.29
  11 -12  -1    3.35    0.47
  10 -12  -1    1.75    0.34
   9 -12  -1    3.24    0.44
   8 -12  -1    8.21    0.74
  -8  12   1    7.36    0.76
  -8  12   1    7.14    0.65
   7 -12  -1    0.74    0.20
  -7  12   1    0.60    0.19
  -7  12   1    0.45    0.23
   6 -12  -1    2.42    0.29
  -6  12   1    1.77    0.27
  -6  12   1    1.81    0.32
   5 -12  -1    0.85    0.18
  -5  12   1    0.39    0.19
  -5  12   1    0.24    0.23
   4 -12  -1    5.98    0.71
   4 -12  -1    5.57    0.49
  -4  12   1    3.69    0.54
  -4  12   1    3.56    0.45
   3 -12  -1    3.10    0.36
   3 -12  -1    3.64    0.48
  -3  12   1    3.11    0.35
  -3  12   1    3.03    0.41
   2 -12  -1    0.53    0.23
  -2  12   1    0.13    0.22
  -2  12   1    0.17    0.17
   1 -12  -1    0.65    0.25
  -1  12   1    1.02    0.18
  -1  12   1    0.40    0.18
  -1  12   1    0.43    0.23
   0 -12  -1    0.15    0.22
   0  12   1    0.27    0.15
   0  12   1   -0.36    0.15
   0  12   1   -0.09    0.19
  -1 -12  -1    1.22    0.28
   1  12   1    0.63    0.24
   1  12   1    1.09    0.20
   1  12   1    0.60    0.21
  -2 -12  -1    3.10    0.52
   2  12   1    1.95    0.34
   2  12   1    2.93    0.32
   2  12   1    2.32    0.32
  -3 -12  -1    2.46    0.41
   3  12   1    2.23    0.29
   3  12   1    1.88    0.34
   3  12   1    2.74    0.32
  -4 -12  -1   -0.27    0.24
   4  12   1   -0.29    0.22
   4  12   1   -0.10    0.17
   4  12   1    0.09    0.16
  -5 -12  -1    0.57    0.28
   5  12   1    0.63    0.20
   5  12   1    0.18    0.24
   5  12   1    0.49    0.20
  -6 -12  -1    2.11    0.43
   6  12   1    2.64    0.34
   6  12   1    1.82    0.30
   6  12   1    1.87    0.36
  -7 -12  -1    0.93    0.35
   7  12   1    0.88    0.25
   7  12   1    0.81    0.23
   7  12   1    0.89    0.30
  -8 -12  -1    2.25    0.47
   8  12   1    2.22    0.34
  -9 -12  -1    0.31    0.35
   9  12   1    0.19    0.23
 -10 -12  -1    0.05    0.34
 -11 -12  -1    0.33    0.38
  11 -13  -1    1.66    0.34
  10 -13  -1    0.67    0.28
   9 -13  -1    1.76    0.32
  -9  13   1    1.89    0.35
   8 -13  -1    0.15    0.22
  -8  13   1    0.74    0.25
  -8  13   1    0.61    0.20
  -7  13   1    3.28    0.41
   6 -13  -1    1.59    0.29
  -6  13   1    2.75    0.36
  -6  13   1    2.54    0.30
   5 -13  -1    2.50    0.36
  -5  13   1    3.35    0.36
  -5  13   1    2.81    0.40
   4 -13  -1    0.07    0.16
  -4  13   1   -0.14    0.17
  -4  13   1   -0.15    0.23
  -3  13   1    1.52    0.31
  -3  13   1    3.04    0.34
   2 -13  -1    0.49    0.17
  -2  13   1    0.30    0.24
  -2  13   1    0.18    0.19
   1 -13  -1    3.17    0.57
  -1  13   1    2.81    0.40
  -1  13   1    2.90    0.35
  -1  13   1    3.34    0.37
   0 -13  -1    0.34    0.26
   0  13   1   -0.04    0.22
   0  13   1    0.14    0.15
   0  13   1   -0.25    0.17
  -1 -13  -1    0.79    0.28
   1  13   1    1.30    0.21
  -2 -13  -1    9.86    1.19
   2  13   1    9.57    0.94
   2  13   1   10.15    0.89
   2  13   1    8.90    0.79
  -3 -13  -1    0.10    0.26
   3  13   1    0.23    0.18
   3  13   1    0.22    0.23
   3  13   1    0.20    0.17
  -4 -13  -1    1.58    0.36
   4  13   1    1.49    0.29
   4  13   1    1.11    0.24
   4  13   1    1.58    0.26
  -5 -13  -1    0.35    0.28
   5  13   1    0.39    0.26
   5  13   1    0.45    0.21
   5  13   1    0.43    0.21
  -6 -13  -1    0.46    0.29
   6  13   1    0.31    0.21
   6  13   1    0.25    0.27
   6  13   1    0.65    0.22
  -7 -13  -1    0.29    0.31
   7  13   1    0.23    0.28
   7  13   1    0.02    0.22
   7  13   1    0.09    0.21
  -8 -13  -1    0.09    0.33
   8  13   1    0.24    0.24
  -9 -13  -1    0.13    0.35
 -10 -13  -1    0.43    0.39
  10 -14  -1    0.58    0.28
   9 -14  -1    1.53    0.30
  -9  14   1    1.02    0.30
   8 -14  -1    0.14    0.22
  -8  14   1    0.71    0.27
  -8  14   1    0.30    0.20
   7 -14  -1    3.17    0.41
  -7  14   1    2.86    0.36
  -7  14   1    2.67    0.42
   6 -14  -1    4.01    0.45
  -6  14   1    3.97    0.48
  -6  14   1    3.23    0.42
   5 -14  -1    0.16    0.18
  -5  14   1   -0.16    0.26
  -5  14   1   -0.11    0.18
   4 -14  -1   -0.13    0.17
  -4  14   1   -0.04    0.26
  -4  14   1   -0.22    0.18
  -3  14   1    1.63    0.31
   2 -14  -1    2.99    0.38
  -2  14   1    2.97    0.41
  -2  14   1    3.18    0.36
  -1  14   1   10.57    0.93
  -1  14   1    8.39    0.79
   0  14   1    1.28    0.24
   0  14   1    1.22    0.24
   0  14   1    1.17    0.29
   1  14   1    2.31    0.31
   1  14   1    1.82    0.27
   1  14   1    1.85    0.33
   2  14   1    0.13    0.18
   2  14   1   -0.09    0.24
   2  14   1    0.29    0.19
  -3 -14  -1   -0.11    0.26
   3  14   1    0.20    0.18
   3  14   1    0.49    0.26
   3  14   1    0.33    0.19
  -4 -14  -1    0.97    0.35
   4  14   1    0.51    0.29
   4  14   1    1.13    0.25
   4  14   1    1.29    0.25
  -5 -14  -1    0.64    0.33
   5  14   1    0.48    0.22
   5  14   1    0.47    0.28
   5  14   1    0.40    0.23
  -6 -14  -1    0.06    0.31
   6  14   1    0.14    0.21
   6  14   1   -0.05    0.22
   6  14   1    0.04    0.28
  -7 -14  -1    0.34    0.32
   7  14   1    0.52    0.24
   7  14   1    0.85    0.32
  -8 -14  -1   -0.02    0.33
  10 -15  -1    0.76    0.30
   9 -15  -1    2.13    0.34
   8 -15  -1    1.49    0.30
  -8  15   1    1.45    0.36
  -8  15   1    1.61    0.28
   7 -15  -1    0.24    0.22
  -7  15   1    0.41    0.31
  -7  15   1    0.15    0.22
   6 -15  -1    0.52    0.22
  -6  15   1    0.83    0.32
  -6  15   1    0.49    0.23
   5 -15  -1    1.14    0.25
  -5  15   1    1.43    0.35
  -5  15   1    2.02    0.29
   4 -15  -1    0.34    0.20
  -4  15   1    0.16    0.21
  -4  15   1    0.31    0.30
   3 -15  -1    0.20    0.19
  -3  15   1    0.94    0.30
  -3  15   1    0.61    0.21
   2 -15  -1    0.08    0.18
  -2  15   1    0.25    0.28
  -2  15   1    0.57    0.21
  -1  15   1    4.49    0.50
  -1  15   1    5.21    0.62
   0  15   1    2.19    0.31
   0  15   1    1.69    0.35
   0  15   1    2.05    0.30
   1  15   1    1.98    0.29
   1  15   1    1.57    0.34
   1  15   1    2.24    0.32
   2  15   1    0.20    0.20
   2  15   1    0.11    0.25
   2  15   1    0.10    0.20
   3  15   1    1.32    0.27
   3  15   1    1.71    0.29
   3  15   1    1.48    0.30
   4  15   1    0.51    0.23
   4  15   1    0.51    0.22
   4  15   1    0.15    0.28
   5  15   1    0.16    0.20
   5  15   1   -0.01    0.22
   5  15   1    0.13    0.28
   6  15   1    0.80    0.27
   6  15   1    1.04    0.30
   7  15   1   -0.05    0.30
   9 -16  -1   -0.16    0.26
  -9  16   1    0.04    0.30
   8 -16  -1   -0.07    0.23
  -8  16   1   -0.28    0.22
  -8  16   1   -0.38    0.28
   7 -16  -1    0.94    0.27
  -7  16   1    0.98    0.26
  -7  16   1    0.98    0.35
   6 -16  -1    0.00    0.21
  -6  16   1   -0.10    0.32
  -6  16   1   -0.04    0.21
   5 -16  -1   -0.13    0.19
  -5  16   1    0.24    0.31
  -5  16   1    0.33    0.23
   4 -16  -1    0.16    0.21
  -4  16   1    0.20    0.21
  -4  16   1    0.58    0.32
   3 -16  -1    1.35    0.27
  -3  16   1    1.31    0.27
  -3  16   1    1.91    0.36
   2 -16  -1    0.70    0.23
  -2  16   1    0.86    0.24
  -2  16   1    1.14    0.33
  -1  16   1    1.23    0.26
  -1  16   1    1.53    0.33
   0  16   1    2.56    0.41
   0  16   1    2.76    0.37
   0  16   1    2.61    0.35
   1  16   1    1.82    0.32
   1  16   1    1.23    0.25
   2  16   1    0.46    0.29
   2  16   1    0.56    0.23
   2  16   1    1.02    0.25
   3  16   1    0.55    0.23
   3  16   1    0.68    0.30
   3  16   1    0.32    0.22
   4  16   1    0.71    0.29
   5  16   1    0.79    0.33
   6  16   1   -0.05    0.32
  -9  17   1    0.22    0.31
   8 -17  -1   -0.24    0.24
  -8  17   1   -0.09    0.23
  -8  17   1   -0.01    0.31
   7 -17  -1    1.38    0.30
  -7  17   1    0.97    0.29
  -7  17   1    1.39    0.39
   6 -17  -1    0.51    0.24
  -6  17   1    0.17    0.23
  -6  17   1    0.51    0.35
   5 -17  -1    0.40    0.22
  -5  17   1    0.45    0.35
  -5  17   1    0.48    0.25
   4 -17  -1    1.44    0.28
  -4  17   1    0.98    0.28
  -4  17   1    1.72    0.39
   3 -17  -1    0.53    0.22
  -3  17   1    0.92    0.35
  -3  17   1    1.26    0.27
   2 -17  -1    0.42    0.22
  -2  17   1    0.24    0.23
  -2  17   1    0.66    0.33
   1 -17  -1    0.55    0.23
  -1  17   1    0.89    0.33
   0  17   1    0.31    0.29
   1  17   1    0.33    0.29
   2  17   1    0.32    0.30
   3  17   1   -0.08    0.30
   4  17   1    0.46    0.33
  -8  18   1    0.14    0.34
  -7  18   1    0.22    0.34
   6 -18  -1    0.31    0.25
  -6  18   1    0.48    0.34
   5 -18  -1    0.58    0.25
  -5  18   1    0.71    0.35
  -4  18   1    0.73    0.38
  -3  18   1    0.22    0.35
  -2  18   1    0.67    0.35
  -1  18   1    0.86    0.34
   0  18   1    0.55    0.32
   1  18   1    0.14    0.31
   2  18   1   -0.19    0.31
   1  19  -2    0.11    0.30
   0  19  -2    0.09    0.30
  -1  19  -2    0.24    0.30
  -2  19  -2    0.35    0.33
  -3  19  -2   -0.02    0.34
  -4  19  -2    0.05    0.36
  -5  19  -2    0.35    0.34
  -6  19  -2    0.67    0.35
  -7  19  -2    0.57    0.35
  -8  19  -2   -0.19    0.33
   3  18  -2    0.26    0.31
  -3 -18   2    0.08    0.36
   2  18  -2    0.46    0.31
   1  18  -2    0.30    0.22
   1  18  -2    0.56    0.30
   0  18  -2    0.66    0.30
   0  18  -2    0.69    0.24
  -1  18  -2    0.28    0.31
  -2  18  -2    2.26    0.43
   2 -18   2    2.39    0.34
  -3  18  -2    0.10    0.33
   3 -18   2    0.20    0.20
  -4  18  -2   -0.08    0.33
  -4  18  -2    0.11    0.24
  -5  18  -2    0.09    0.24
  -5  18  -2    0.23    0.34
  -6  18  -2    1.14    0.29
  -6  18  -2    1.54    0.40
  -7  18  -2    0.45    0.36
  -7  18  -2    0.43    0.26
  -8  18  -2    0.57    0.37
  -8  18  -2    0.49    0.27
  -9  18  -2    0.40    0.36
   5  17  -2    0.25    0.31
  -5 -17   2    0.06    0.35
   4  17  -2    0.55    0.31
  -4 -17   2    0.47    0.35
   3  17  -2    0.49    0.21
   3  17  -2    0.69    0.29
   3  17  -2    0.47    0.23
  -3 -17   2   -0.01    0.33
   2  17  -2   -0.06    0.27
   2  17  -2    0.08    0.21
   2  17  -2   -0.13    0.19
  -2 -17   2   -0.03    0.34
   1  17  -2    0.31    0.22
   1  17  -2    0.01    0.18
   1  17  -2    0.52    0.27
  -1 -17   2   -0.20    0.31
   0  17  -2    0.56    0.24
   0  17  -2    0.40    0.30
   0  17  -2    0.67    0.22
   0 -17   2    0.61    0.34
  -1  17  -2    0.34    0.23
  -1  17  -2    0.63    0.31
  -1  17  -2    0.54    0.21
   1 -17   2    0.09    0.32
  -2  17  -2    2.92    0.39
  -2  17  -2    2.80    0.47
   2 -17   2    3.64    0.42
   2 -17   2    3.82    0.65
  -3  17  -2    0.09    0.21
  -3  17  -2    0.10    0.32
   3 -17   2   -0.03    0.31
   3 -17   2    0.02    0.18
  -4  17  -2    1.92    0.40
  -4  17  -2    1.83    0.31
   4 -17   2    1.93    0.31
  -5  17  -2    0.26    0.33
  -5  17  -2    0.02    0.21
  -6  17  -2    0.22    0.22
  -6  17  -2    0.21    0.32
  -7  17  -2    0.33    0.34
  -7  17  -2    0.37    0.23
  -8  17  -2    1.00    0.26
  -8  17  -2    0.76    0.35
  -9  17  -2    0.83    0.35
  -7 -16   2   -0.17    0.36
   6  16  -2    0.22    0.31
   6  16  -2    0.35    0.24
  -6 -16   2    0.28    0.34
   5  16  -2    0.02    0.19
   5  16  -2    0.20    0.23
   5  16  -2    0.40    0.29
  -5 -16   2   -0.02    0.32
   4  16  -2    0.72    0.23
   4  16  -2    0.76    0.23
   4  16  -2    0.46    0.27
  -4 -16   2    0.70    0.34
   3  16  -2    0.05    0.20
   3  16  -2    0.23    0.20
   3  16  -2    0.10    0.26
  -3 -16   2    0.05    0.31
   2  16  -2    2.09    0.31
   2  16  -2    1.83    0.29
   2  16  -2    1.70    0.34
  -2 -16   2    2.06    0.45
   1  16  -2    1.15    0.23
   1  16  -2    1.79    0.31
  -1 -16   2    0.40    0.34
   0  16  -2    0.46    0.20
   0  16  -2    0.38    0.21
   0  16  -2    0.34    0.28
   0 -16   2    0.30    0.31
  -1  16  -2    0.00    0.18
  -1  16  -2    0.21    0.20
  -1  16  -2    0.45    0.29
   1 -16   2    0.06    0.29
  -2  16  -2    0.28    0.21
  -2  16  -2    1.07    0.32
   2 -16   2    0.04    0.30
  -3  16  -2    0.35    0.29
  -3  16  -2    0.24    0.20
   3 -16   2    0.00    0.17
   3 -16   2   -0.01    0.29
  -4  16  -2    3.63    0.42
  -4  16  -2    4.00    0.55
   4 -16   2    3.28    0.43
   4 -16   2    4.00    0.63
  -5  16  -2    0.24    0.21
  -5  16  -2    0.54    0.30
   5 -16   2    0.17    0.19
   5 -16   2    0.07    0.32
  -6  16  -2    0.22    0.22
  -6  16  -2    0.21    0.31
   6 -16   2    0.49    0.41
  -7  16  -2    2.40    0.38
  -7  16  -2    1.64    0.27
   7 -16   2    1.17    0.42
  -8  16  -2   -0.24    0.30
  -8  16  -2   -0.22    0.21
  -9  16  -2    0.10    0.21
  -9  16  -2   -0.29    0.31
  -8 -15   2    0.10    0.35
   7  15  -2    0.13    0.30
  -7 -15   2   -0.09    0.34
   6  15  -2    0.26    0.22
   6  15  -2    0.00    0.28
   6  15  -2    0.00    0.21
  -6 -15   2    0.29    0.35
   5  15  -2    0.47    0.20
   5  15  -2    0.89    0.27
   5  15  -2    0.83    0.22
  -5 -15   2    0.42    0.33
   4  15  -2   -0.06    0.25
   4  15  -2    0.02    0.19
   4  15  -2   -0.15    0.18
  -4 -15   2    0.12    0.30
   3  15  -2    1.00    0.26
   3  15  -2    0.55    0.20
   3  15  -2    1.04    0.22
  -3 -15   2    0.17    0.30
   2  15  -2    2.81    0.41
   2  15  -2    3.07    0.39
   2  15  -2    2.89    0.36
  -2 -15   2    3.29    0.59
   1  15  -2    0.03    0.18
   1  15  -2    0.22    0.18
   1  15  -2    0.27    0.26
  -1 -15   2    0.11    0.30
   0  15  -2    5.03    0.50
   0  15  -2    4.44    0.47
   0  15  -2    4.93    0.59
   0 -15   2    4.62    0.74
  -1  15  -2    1.46    0.31
  -2  15  -2   -0.33    0.26
  -2  15  -2   -0.05    0.18
   2 -15   2    0.30    0.29
  -3  15  -2    0.21    0.27
  -3  15  -2    0.20    0.18
   3 -15   2    0.40    0.18
   3 -15   2    0.19    0.27
  -4  15  -2    0.31    0.19
  -4  15  -2    0.39    0.28
   4 -15   2    0.32    0.18
   4 -15   2    0.19    0.31
  -5  15  -2    0.10    0.18
  -5  15  -2   -0.01    0.26
   5 -15   2    0.03    0.17
   5 -15   2   -0.14    0.33
  -6  15  -2    2.45    0.31
  -6  15  -2    1.94    0.37
   6 -15   2    1.90    0.30
   6 -15   2    2.62    0.52
  -7  15  -2    2.44    0.39
  -7  15  -2    2.38    0.31
   7 -15   2    2.44    0.54
  -8  15  -2    3.15    0.44
  -8  15  -2    3.00    0.36
   8 -15   2    3.10    0.58
  -9  15  -2   -0.12    0.20
  -9  15  -2    0.01    0.27
   9 -15   2    0.30    0.38
  10 -15   2    0.02    0.40
  -9 -14   2   -0.03    0.33
  -8 -14   2    0.77    0.35
   7  14  -2    0.05    0.21
   7  14  -2    0.13    0.28
  -7 -14   2   -0.07    0.30
   6  14  -2    1.39    0.31
   6  14  -2    1.60    0.30
   6  14  -2    1.62    0.27
  -6 -14   2    1.71    0.41
   5  14  -2    0.50    0.20
   5  14  -2    0.41    0.20
   5  14  -2    0.29    0.25
  -5 -14   2    0.17    0.31
   4  14  -2    1.88    0.29
   4  14  -2    1.53    0.31
   4  14  -2    1.95    0.27
  -4 -14   2    2.09    0.43
   3  14  -2    1.00    0.21
   3  14  -2    1.15    0.22
   3  14  -2    1.29    0.27
  -3 -14   2    0.43    0.31
   2  14  -2   -0.08    0.16
   2  14  -2    0.03    0.18
   2  14  -2    0.13    0.25
  -2 -14   2    0.23    0.29
   1  14  -2    3.49    0.44
   1  14  -2    3.37    0.40
   1  14  -2    3.24    0.37
  -1 -14   2    3.55    0.62
   0  14  -2    2.31    0.31
   0  14  -2    1.97    0.35
   0  14  -2    2.06    0.29
   0 -14   2    2.61    0.45
  -1  14  -2    0.04    0.15
  -1  14  -2    0.34    0.16
  -1  14  -2    0.90    0.25
   1 -14   2    0.23    0.27
  -2  14  -2    0.90    0.21
  -2  14  -2    0.78    0.27
   2 -14   2    0.92    0.31
  -3  14  -2    2.08    0.37
  -3  14  -2    2.30    0.30
   3 -14   2    3.18    0.47
   3 -14   2    2.28    0.32
  -4  14  -2    0.75    0.25
  -4  14  -2    0.50    0.18
   4 -14   2    0.08    0.15
   4 -14   2    0.20    0.28
  -5  14  -2    0.14    0.25
  -5  14  -2    0.47    0.19
   5 -14   2    0.47    0.17
   5 -14   2    0.55    0.32
  -6  14  -2    0.08    0.17
  -6  14  -2    0.23    0.25
   6 -14   2    0.04    0.34
   6 -14   2    0.32    0.17
  -7  14  -2    0.16    0.19
  -7  14  -2    0.05    0.25
   7 -14   2   -0.01    0.32
  -8  14  -2    4.22    0.49
  -8  14  -2    3.47    0.43
   8 -14   2    4.21    0.69
  -9  14  -2    5.51    0.54
  -9  14  -2    5.41    0.64
  10 -14   2    0.81    0.42
  11 -14   2    0.09    0.43
  12 -14   2    0.41    0.46
  13 -14   2    0.10    0.47
 -11 -13   2   -0.06    0.38
 -10 -13   2    0.59    0.39
   9  13  -2    0.13    0.23
  -9 -13   2    0.19    0.34
   8  13  -2   -0.04    0.22
  -8 -13   2    0.26    0.32
   7  13  -2    0.27    0.27
   7  13  -2    0.79    0.24
   7  13  -2    0.54    0.24
  -7 -13   2    0.41    0.31
   6  13  -2    0.81    0.23
   6  13  -2    1.02    0.25
   6  13  -2    0.68    0.27
  -6 -13   2    1.52    0.36
   5  13  -2    0.05    0.18
   5  13  -2   -0.19    0.23
   5  13  -2   -0.10    0.18
  -5 -13   2   -0.16    0.28
   4  13  -2   -0.08    0.22
   4  13  -2   -0.12    0.17
   4  13  -2    0.10    0.17
  -4 -13   2   -0.24    0.28
   3  13  -2   -0.13    0.15
   3  13  -2    0.08    0.22
   3  13  -2    0.06    0.16
  -3 -13   2    0.08    0.27
   2  13  -2    3.03    0.39
   2  13  -2    2.79    0.33
   2  13  -2    2.89    0.36
  -2 -13   2    3.14    0.50
   1  13  -2    0.38    0.21
   1  13  -2   -0.02    0.13
   1  13  -2    0.13    0.15
  -1 -13   2   -0.19    0.25
   0  13  -2    0.42    0.22
   0  13  -2    0.41    0.16
   0  13  -2    0.38    0.16
   0 -13   2    0.29    0.28
  -1  13  -2    0.03    0.13
  -1  13  -2    0.15    0.14
  -1  13  -2    0.32    0.21
   1 -13   2   -0.26    0.23
  -2  13  -2    1.41    0.19
  -2  13  -2    0.80    0.17
   2 -13   2    0.63    0.28
  -3  13  -2    0.11    0.15
  -3  13  -2    0.18    0.21
   3 -13   2    0.08    0.24
   3 -13   2    0.06    0.13
  -4  13  -2    3.45    0.40
  -4  13  -2    3.85    0.51
   4 -13   2    4.12    0.42
   4 -13   2    4.55    0.67
  -5  13  -2    8.90    0.75
  -5  13  -2    7.26    0.64
   5 -13   2    7.23    0.96
   5 -13   2    6.33    0.67
  -6  13  -2    0.70    0.19
  -6  13  -2    0.74    0.25
   6 -13   2    0.58    0.18
   6 -13   2    0.81    0.34
   7 -13   2    1.98    0.43
   7 -13   2    1.60    0.26
  -8  13  -2    0.07    0.23
  -8  13  -2    0.13    0.17
   8 -13   2    0.31    0.33
  -9  13  -2    0.94    0.22
  -9  13  -2    1.12    0.27
   9 -13   2    0.92    0.39
  10 -13   2    2.26    0.52
  11 -13   2    0.20    0.41
  12 -13   2    1.08    0.48
  13 -13   2    0.49    0.48
  14 -13   2    0.20    0.48
 -11 -12   2    0.11    0.37
  10  12  -2    0.83    0.27
 -10 -12   2    0.88    0.40
   9  12  -2    0.17    0.22
  -9 -12   2    0.15    0.34
   8  12  -2    0.95    0.25
  -8 -12   2    0.81    0.37
   7  12  -2    0.09    0.24
   7  12  -2    0.08    0.19
   7  12  -2    0.04    0.20
  -7 -12   2    0.12    0.30
   6  12  -2    0.46    0.19
   6  12  -2    0.54    0.21
   6  12  -2    0.39    0.24
  -6 -12   2    0.45    0.30
   5  12  -2    0.77    0.23
   5  12  -2    0.88    0.20
   5  12  -2    0.88    0.20
  -5 -12   2    0.47    0.28
   4  12  -2    0.90    0.22
   4  12  -2    1.13    0.21
   4  12  -2    0.95    0.25
  -4 -12   2    0.73    0.32
   3  12  -2    1.58    0.26
   3  12  -2    1.02    0.19
   3  12  -2    1.15    0.21
  -3 -12   2    0.91    0.33
   2  12  -2    2.76    0.31
   2  12  -2    2.45    0.34
   2  12  -2    2.78    0.36
  -2 -12   2    3.42    0.47
   1  12  -2    5.68    0.51
   1  12  -2    5.75    0.59
   0  12  -2    2.48    0.32
   0  12  -2    2.94    0.34
   0  12  -2    2.91    0.37
   0 -12   2    3.50    0.48
  -1  12  -2    6.69    0.59
   1 -12   2    5.69    0.82
  -2  12  -2    2.93    0.39
  -2  12  -2    2.03    0.30
  -2  12  -2    2.65    0.31
  -3  12  -2    1.49    0.28
  -3  12  -2    1.60    0.24
   3 -12   2    2.15    0.26
  -4  12  -2    5.29    0.53
  -4  12  -2    5.04    0.63
   4 -12   2    6.76    0.57
   4 -12   2    6.71    0.83
  -5  12  -2    2.78    0.38
  -5  12  -2    3.09    0.33
   5 -12   2    3.75    0.51
   5 -12   2    2.84    0.35
  -6  12  -2    3.42    0.33
  -6  12  -2    2.35    0.33
   6 -12   2    2.29    0.45
   6 -12   2    2.14    0.29
  -7  12  -2    0.06    0.20
  -7  12  -2    0.26    0.16
   7 -12   2    0.27    0.28
   7 -12   2    0.38    0.16
  -8  12  -2    3.33    0.38
  -8  12  -2    3.67    0.43
   8 -12   2    3.42    0.43
   8 -12   2    4.70    0.67
  -9  12  -2    0.16    0.16
  -9  12  -2    0.29    0.21
   9 -12   2    0.35    0.34
  10 -12   2    1.83    0.48
  11 -12   2    0.95    0.43
  12 -12   2    4.72    0.80
  13 -12   2    0.77    0.43
  14 -12   2    0.18    0.46
  15 -12   2   -0.11    0.50
  10  11  -2    1.21    0.30
 -10 -11   2    1.15    0.40
   9  11  -2    0.61    0.25
  -9 -11   2    0.72    0.35
   8  11  -2    3.67    0.41
  -8 -11   2    2.52    0.52
   7  11  -2    0.21    0.18
   7  11  -2    0.28    0.18
   7  11  -2    0.42    0.23
  -7 -11   2    0.37    0.30
   6  11  -2    3.00    0.36
   6  11  -2    3.50    0.40
   6  11  -2    2.61    0.38
  -6 -11   2    3.36    0.53
   5  11  -2    6.93    0.57
   5  11  -2    7.21    0.68
   5  11  -2    6.60    0.63
  -5 -11   2    5.41    0.87
   4  11  -2    0.09    0.19
   4  11  -2    0.18    0.14
   4  11  -2    0.07    0.15
  -4 -11   2   -0.09    0.23
   3  11  -2    8.93    0.84
   3  11  -2    8.59    0.72
   3  11  -2    9.13    0.81
   2  11  -2    3.66    0.36
   2  11  -2    3.85    0.45
   2  11  -2    3.87    0.41
  -2 -11   2    3.74    0.60
   1  11  -2    6.07    0.67
   1  11  -2    7.94    0.64
   1  11  -2    6.56    0.58
  -1 -11   2    6.68    0.88
   0  11  -2   10.47    0.84
   0  11  -2    8.79    0.87
   0  11  -2    8.19    0.76
   0 -11   2   10.38    1.15
  -1  11  -2    7.74    0.56
  -1  11  -2    6.70    0.64
   1 -11   2    5.15    0.81
  -2  11  -2    5.28    0.50
  -2  11  -2    5.23    0.42
  -2  11  -2    4.66    0.45
   2 -11   2    3.32    0.64
  -3  11  -2   -0.06    0.16
  -3  11  -2   -0.03    0.12
   3 -11   2   -0.03    0.10
   3 -11   2   -0.06    0.20
  -4  11  -2    1.54    0.25
  -4  11  -2    2.38    0.27
  -5  11  -2   10.46    0.74
   5 -11   2    8.61    1.10
   5 -11   2    7.91    0.79
  -6  11  -2    6.01    0.61
  -6  11  -2    6.52    0.52
   6 -11   2    4.64    0.82
  -7  11  -2    6.69    0.50
  -7  11  -2    6.77    0.60
   7 -11   2    4.98    0.55
   7 -11   2    4.05    0.77
  -8  11  -2    3.74    0.39
  -8  11  -2    3.66    0.48
   8 -11   2    4.32    0.45
   8 -11   2    4.31    0.68
  -9  11  -2    5.63    0.51
  -9  11  -2    5.94    0.61
  10 -11   2    5.89    0.88
  11 -11   2    1.16    0.43
  12 -11   2    2.49    0.53
  13 -11   2   -0.06    0.41
  14 -11   2    0.22    0.46
  15 -11   2    0.21    0.51
  16 -11   2    0.36    0.57
  11  10  -2    0.12    0.24
  10  10  -2    0.10    0.22
   9  10  -2    4.01    0.48
   8  10  -2    1.13    0.25
   7  10  -2    0.32    0.16
   7  10  -2    0.35    0.18
   7  10  -2    0.13    0.20
  -7 -10   2    0.51    0.29
   6  10  -2    0.19    0.15
   6  10  -2    0.18    0.16
   6  10  -2    0.35    0.19
  -6 -10   2    0.18    0.29
   5  10  -2    0.18    0.14
   5  10  -2    0.11    0.16
   5  10  -2    0.17    0.19
  -5 -10   2   -0.12    0.25
   4  10  -2    2.91    0.32
   4  10  -2    2.78    0.39
   4  10  -2    2.86    0.35
  -4 -10   2    3.68    0.48
   3  10  -2    5.07    0.47
   3  10  -2    5.72    0.53
   3  10  -2    5.46    0.55
   2  10  -2    4.51    0.47
   2  10  -2    4.68    0.43
   2  10  -2    3.83    0.39
  -2 -10   2    4.28    0.66
   1  10  -2    2.54    0.30
   1  10  -2    2.77    0.28
  -1 -10   2    2.61    0.41
   0  10  -2    2.24    0.28
   0  10  -2    2.22    0.27
   0  10  -2    2.51    0.33
   0 -10   2    2.55    0.37
  -1  10  -2    1.23    0.21
  -1  10  -2    1.42    0.19
  -1  10  -2    1.13    0.18
  -2  10  -2   24.04    1.98
  -2  10  -2   22.20    1.79
  -2  10  -2   22.62    2.02
   2 -10   2   24.54    2.63
  -3  10  -2    0.26    0.15
  -3  10  -2    0.29    0.13
   3 -10   2    0.34    0.19
   3 -10   2    0.35    0.11
  -4  10  -2    2.12    0.28
  -4  10  -2    2.65    0.31
   4 -10   2    2.93    0.41
   4 -10   2    2.42    0.28
  -5  10  -2   26.79    1.93
   5 -10   2   23.72    2.15
   5 -10   2   25.47    2.85
  -6  10  -2    8.25    0.63
  -6  10  -2    7.45    0.72
   6 -10   2    6.49    0.96
  -7  10  -2    6.42    0.60
  -7  10  -2    5.98    0.69
   7 -10   2    8.46    0.67
   7 -10   2    7.63    0.93
  -8  10  -2    3.59    0.38
  -8  10  -2    2.77    0.35
   8 -10   2    3.38    0.61
   8 -10   2    3.82    0.40
  -9  10  -2    7.71    0.75
  -9  10  -2    7.74    0.64
   9 -10   2    7.92    0.74
   9 -10   2    7.68    1.03
  10 -10   2    6.71    0.95
  11 -10   2    0.65    0.39
  12 -10   2    0.50    0.39
  13 -10   2    1.11    0.43
  14 -10   2    0.15    0.46
  15 -10   2    0.50    0.52
  16 -10   2    0.28    0.56
  13   9  -2    1.01    0.67
  12   9  -2    0.39    0.25
  12   9  -2    0.66    0.61
  11   9  -2    0.75    0.59
  11   9  -2   -0.04    0.21
  10   9  -2    0.01    0.47
  10   9  -2    0.98    0.26
   9   9  -2    1.13    0.27
   9   9  -2    1.92    0.47
   8   9  -2    0.44    0.20
   7   9  -2    0.00    0.18
   7   9  -2    0.20    0.14
   7   9  -2    0.03    0.16
   6   9  -2    3.52    0.39
   6   9  -2    2.35    0.35
   5   9  -2    7.30    0.64
   5   9  -2    6.90    0.57
   5   9  -2    7.14    0.66
  -5  -9   2    5.69    0.88
   4   9  -2   10.51    0.94
   4   9  -2   10.65    0.93
   4   9  -2    9.82    0.82
  -4  -9   2   10.69    1.24
   3   9  -2    4.67    0.47
   3   9  -2    4.46    0.44
   3   9  -2    4.16    0.40
  -3  -9   2    4.66    0.62
   2   9  -2    9.92    0.88
   2   9  -2   10.62    0.77
   2   9  -2    8.70    0.86
   1   9  -2    8.80    0.73
   1   9  -2    6.73    0.70
   1   9  -2    8.50    0.64
   0   9  -2    0.22    0.13
   0   9  -2    0.28    0.10
   0   9  -2    0.15    0.10
   0  -9   2    0.30    0.18
  -1   9  -2    2.92    0.36
  -1   9  -2    3.22    0.31
  -1   9  -2    2.74    0.30
   1  -9   2    3.27    0.49
  -2   9  -2   21.36    1.92
  -2   9  -2   23.70    1.96
  -2   9  -2   23.17    1.74
  -3   9  -2   14.61    1.27
   3  -9   2   18.40    1.41
  -4   9  -2    4.65    0.52
  -4   9  -2    5.28    0.46
   4  -9   2    5.26    0.71
   4  -9   2    5.85    0.49
  -5   9  -2   14.95    1.16
  -5   9  -2   13.47    1.31
   5  -9   2   15.86    1.29
   5  -9   2   15.67    1.72
   6  -9   2   13.81    1.31
   6  -9   2   16.75    1.76
  -7   9  -2    5.12    0.42
  -7   9  -2    5.00    0.49
   7  -9   2    3.46    0.66
   7  -9   2    4.40    0.45
  -8   9  -2   -0.03    0.14
  -8   9  -2   -0.13    0.12
   8  -9   2   -0.11    0.13
   8  -9   2    0.08    0.25
  -9   9  -2   11.69    0.92
  10  -9   2    5.65    0.87
  10  -9   2    5.98    0.60
  11  -9   2    0.30    0.37
  12  -9   2    0.70    0.39
  13  -9   2    1.51    0.46
  14  -9   2    0.27    0.46
  15  -9   2    0.06    0.50
  16  -9   2    0.47    0.59
  14   8  -2    0.20    0.67
  13   8  -2    0.59    0.65
  13   8  -2    1.75    0.33
  12   8  -2    0.18    0.58
  12   8  -2    0.00    0.22
  11   8  -2    0.38    0.23
  11   8  -2    0.15    0.54
  10   8  -2    0.48    0.52
  10   8  -2    0.82    0.24
   9   8  -2    2.77    0.58
   8   8  -2    3.10    0.63
   8   8  -2    3.74    0.41
   7   8  -2    7.47    0.60
   7   8  -2    7.43    0.69
   7   8  -2    6.26    0.93
   7   8  -2    6.80    0.67
   6   8  -2   14.14    1.25
   6   8  -2   14.42    1.12
   6   8  -2   14.34    1.27
   5   8  -2   11.72    1.13
   5   8  -2   13.46    1.01
   5   8  -2   13.87    1.14
  -5  -8   2   12.60    1.50
   4   8  -2    0.71    0.16
   4   8  -2    1.04    0.15
   4   8  -2    0.73    0.17
  -4  -8   2    1.12    0.25
   3   8  -2   10.74    0.81
   3   8  -2   10.97    0.91
  -3  -8   2    8.91    1.20
   2   8  -2   23.83    1.92
   2   8  -2   22.41    1.72
   2   8  -2   21.49    1.94
   1   8  -2    7.04    0.64
   1   8  -2    8.36    0.71
   1   8  -2    7.15    0.73
  -1  -8   2    9.50    0.97
   0   8  -2    1.43    0.22
   0   8  -2    1.92    0.20
   0   8  -2    1.91    0.23
   0  -8   2    2.01    0.30
  -1   8  -2    3.15    0.37
  -1   8  -2    4.10    0.32
  -1   8  -2    3.34    0.33
   1  -8   2    3.03    0.50
  -2   8  -2   40.22    3.69
  -2   8  -2   45.37    3.73
  -2   8  -2   46.32    3.32
  -3   8  -2    2.65    0.27
   3  -8   2    2.68    0.27
  -4   8  -2   15.61    1.47
  -4   8  -2   15.74    1.30
   4  -8   2   17.50    1.92
   4  -8   2   18.71    1.44
  -5   8  -2   10.30    0.99
  -5   8  -2   10.02    0.87
   5  -8   2   12.83    0.96
   5  -8   2   11.05    1.30
  -6   8  -2   19.01    1.60
  -6   8  -2   19.93    1.42
   6  -8   2   17.74    2.10
   6  -8   2   17.39    1.58
  -7   8  -2   24.44    2.00
  -7   8  -2   24.54    1.77
   7  -8   2   20.85    1.98
  -8   8  -2    1.30    0.16
  -8   8  -2    0.98    0.17
   8  -8   2    1.08    0.19
   8  -8   2    1.34    0.31
  -9   8  -2    7.86    0.59
   9  -8   2    6.85    0.68
   9  -8   2    6.44    0.97
  10  -8   2    0.58    0.18
  10  -8   2    0.65    0.33
  11  -8   2    1.47    0.43
  11  -8   2    2.03    0.29
  12  -8   2    2.67    0.53
  13  -8   2    0.30    0.40
  14  -8   2    0.94    0.48
  15  -8   2    0.85    0.55
  16  -8   2    1.56    0.62
  17  -8   2    0.64    0.67
  14   7  -2    0.38    0.66
  13   7  -2    1.96    0.34
  13   7  -2    1.03    0.65
  12   7  -2    2.05    0.67
  12   7  -2    3.23    0.42
  11   7  -2    1.55    0.60
  11   7  -2    2.10    0.33
  10   7  -2    8.89    0.86
  10   7  -2    9.45    1.24
   9   7  -2    0.66    0.46
   9   7  -2    0.92    0.22
   8   7  -2    2.07    0.28
   8   7  -2    1.53    0.48
   7   7  -2    6.90    0.58
   6   7  -2   12.12    1.55
   6   7  -2   12.68    1.16
   6   7  -2   14.15    1.16
   6   7  -2   13.59    1.02
   5   7  -2    4.60    0.39
   5   7  -2    4.47    0.46
   4   7  -2    1.37    0.19
   4   7  -2    1.21    0.18
  -4  -7   2    1.37    0.26
   3   7  -2   19.89    1.82
   3   7  -2   23.37    1.81
   3   7  -2   20.55    1.62
   2   7  -2   30.94    2.51
   2   7  -2   28.10    2.53
   2   7  -2   28.32    2.25
  -2  -7   2   31.40    3.31
   1   7  -2    9.84    0.88
   1   7  -2    9.36    0.86
   1   7  -2   10.62    0.78
   0   7  -2   14.01    0.98
   0   7  -2   12.18    1.10
   0   7  -2   11.30    1.09
   0  -7   2   13.39    1.45
  -1   7  -2    9.04    0.85
  -1   7  -2   11.57    0.88
   1  -7   2    9.36    1.15
  -2   7  -2   28.72    2.43
  -2   7  -2   28.80    2.39
  -2   7  -2   27.46    2.15
   2  -7   2   28.72    3.16
  -3   7  -2    4.33    0.46
  -3   7  -2    4.76    0.40
   3  -7   2    4.97    0.42
  -4   7  -2    6.44    0.51
  -4   7  -2    6.14    0.60
  -5   7  -2   67.53    5.82
  -5   7  -2   69.09    5.17
   5  -7   2   63.93    7.60
   5  -7   2   74.26    5.76
  -6   7  -2    0.57    0.14
  -6   7  -2    0.73    0.13
   6  -7   2    0.62    0.12
   6  -7   2    0.61    0.23
  -7   7  -2    1.20    0.17
  -7   7  -2    1.14    0.15
   7  -7   2    0.86    0.28
   7  -7   2    1.05    0.17
  -8   7  -2    0.09    0.11
  -8   7  -2    0.07    0.10
   8  -7   2   -0.05    0.12
   8  -7   2    0.19    0.25
   9  -7   2    2.64    0.34
   9  -7   2    2.60    0.45
  10  -7   2    8.55    1.05
  10  -7   2    7.98    0.77
  11  -7   2    0.30    0.18
  11  -7   2    0.08    0.33
  12  -7   2    0.41    0.38
  13  -7   2    0.27    0.41
  14  -7   2    1.05    0.49
  15  -7   2    1.55    0.57
  16  -7   2    2.33    0.68
  17  -7   2    0.29    0.68
  15   6  -2   -0.34    0.65
  14   6  -2    0.33    0.25
  14   6  -2    0.04    0.61
  13   6  -2    0.30    0.57
  13   6  -2    0.34    0.24
  12   6  -2    1.48    0.30
  12   6  -2    1.44    0.57
  11   6  -2    1.35    0.52
  10   6  -2    4.87    0.53
  10   6  -2    5.01    0.83
   9   6  -2    1.90    0.29
   8   6  -2    1.81    0.46
   8   6  -2    1.92    0.27
   7   6  -2    4.81    0.37
   7   6  -2    3.35    0.42
   6   6  -2   33.87    2.80
   6   6  -2   32.06    2.79
   6   6  -2   33.78    2.49
   6   6  -2   31.57    3.70
   5   6  -2   19.67    1.99
   5   6  -2   16.24    1.48
   5   6  -2   16.30    1.31
   4   6  -2    6.54    0.53
   4   6  -2    6.36    0.61
   4   6  -2    6.98    0.60
   3   6  -2   11.95    1.04
   3   6  -2   11.36    0.92
   3   6  -2   12.43    1.03
   2   6  -2    1.54    0.18
   1   6  -2   46.22    4.17
   1   6  -2   52.70    4.21
   1   6  -2   50.27    3.74
   0   6  -2   14.96    1.06
   0   6  -2   13.06    1.19
   0  -6   2   13.26    1.56
  -1   6  -2   43.36    3.56
  -1   6  -2   50.67    3.97
  -1   6  -2   43.62    4.01
   1  -6   2   51.71    5.24
  -2   6  -2   41.16    3.01
  -2   6  -2   36.38    3.34
  -2   6  -2   42.32    3.39
  -3   6  -2    1.54    0.20
   3  -6   2    2.28    0.21
  -4   6  -2   29.28    2.42
  -4   6  -2   27.39    2.14
  -5   6  -2    4.24    0.48
   5  -6   2    5.28    0.66
   5  -6   2    5.68    0.46
  -6   6  -2    0.38    0.13
  -6   6  -2    0.56    0.12
   6  -6   2    0.26    0.10
   6  -6   2   -0.02    0.21
  -7   6  -2    0.97    0.13
  -7   6  -2    1.03    0.15
   7  -6   2    0.87    0.15
   7  -6   2    0.20    0.27
  -8   6  -2    1.99    0.20
  -8   6  -2    2.08    0.23
   8  -6   2    2.18    0.39
   8  -6   2    1.94    0.24
   9  -6   2   12.58    0.96
   9  -6   2    8.81    1.27
  10  -6   2    7.13    0.71
  10  -6   2    8.31    1.02
  11  -6   2    4.77    0.56
  11  -6   2    6.48    0.84
  12  -6   2   16.19    1.61
  12  -6   2   21.10    2.18
  13  -6   2    4.07    0.74
  14  -6   2    0.28    0.49
  15  -6   2    0.45    0.55
  16  -6   2    0.61    0.64
  17  -6   2   -0.03    0.66
  15   5  -2   -0.13    0.64
  14   5  -2    0.53    0.25
  14   5  -2   -0.10    0.58
  13   5  -2    2.75    0.37
  13   5  -2    1.25    0.62
  12   5  -2    0.03    0.21
  12   5  -2    0.44    0.51
  11   5  -2    0.74    0.46
  11   5  -2   -0.04    0.19
  10   5  -2    7.87    1.10
  10   5  -2    7.69    0.74
   9   5  -2    2.59    0.37
   9   5  -2    3.59    0.57
   8   5  -2    5.64    0.88
   8   5  -2    6.29    0.59
   7   5  -2    4.42    0.48
   7   5  -2    5.26    0.47
   7   5  -2    4.69    0.73
   6   5  -2    2.98    0.31
   6   5  -2    3.17    0.27
   6   5  -2    2.09    0.30
   6   5  -2    2.71    0.46
   5   5  -2   84.81    9.13
   5   5  -2   82.25    6.97
   5   5  -2   80.39    6.19
   4   5  -2    6.53    0.78
   4   5  -2    5.52    0.54
   4   5  -2    6.11    0.54
   4   5  -2    5.61    0.48
   3   5  -2   11.75    1.07
   3   5  -2   11.68    0.94
   3   5  -2   13.69    1.06
   2   5  -2   30.57    2.75
   2   5  -2   32.84    2.72
   2   5  -2   33.66    2.44
   1   5  -2   37.89    2.85
   0   5  -2    3.97    0.30
   0  -5   2    3.26    0.46
  -1   5  -2    6.35    0.50
  -1   5  -2    6.45    0.54
  -1   5  -2    6.24    0.56
   1  -5   2    6.20    0.74
   2  -5   2    7.86    0.90
  -3   5  -2    4.86    0.37
  -3   5  -2    4.03    0.42
   4  -5   2    8.86    0.84
   4  -5   2   10.94    1.13
  -5   5  -2    0.40    0.11
  -5   5  -2    0.24    0.13
   5  -5   2    0.47    0.09
   5  -5   2    0.93    0.20
  -6   5  -2   22.13    1.64
  -6   5  -2   22.45    1.85
   6  -5   2   20.95    1.83
   6  -5   2   20.71    2.44
  -7   5  -2   40.02    3.06
   7  -5   2   41.25    3.42
  -8   5  -2    0.76    0.15
   8  -5   2    1.20    0.31
   8  -5   2    0.83    0.15
   9  -5   2   14.07    1.53
   9  -5   2   11.73    1.12
  10  -5   2    8.05    1.06
  10  -5   2    7.96    0.74
  11  -5   2    0.06    0.18
  11  -5   2    0.30    0.34
  12  -5   2   28.03    2.90
  12  -5   2   22.58    2.16
  13  -5   2    0.22    0.21
  13  -5   2    0.85    0.47
  14  -5   2    1.30    0.55
  15  -5   2   -0.78    0.54
  16  -5   2   -0.37    0.63
  17  -5   2   -0.48    0.70
  16   4  -2    0.12    0.66
  15   4  -2    0.63    0.64
  15   4  -2    1.44    0.31
  14   4  -2    1.42    0.65
  14   4  -2    2.53    0.37
  13   4  -2    1.25    0.57
  13   4  -2    1.33    0.28
  12   4  -2    1.44    0.27
  12   4  -2    1.37    0.53
  11   4  -2    0.47    0.19
  11   4  -2    0.24    0.44
  10   4  -2    1.23    0.25
  10   4  -2    1.59    0.46
   9   4  -2    4.98    0.72
   9   4  -2    3.41    0.43
   8   4  -2    2.68    0.36
   8   4  -2    3.89    0.54
   7   4  -2    0.07    0.12
   7   4  -2   -0.19    0.28
   7   4  -2    0.01    0.08
   6   4  -2    0.88    0.12
   6   4  -2    1.42    0.14
   6   4  -2    0.91    0.27
   6   4  -2    0.46    0.15
   5   4  -2   10.69    0.97
   5   4  -2   11.67    0.86
   5   4  -2   11.47    1.34
   4   4  -2    7.61    0.68
   4   4  -2    7.63    0.60
   4   4  -2    7.92    0.95
   4   4  -2    7.95    0.69
   3   4  -2   50.75    3.88
   3   4  -2   45.64    5.12
   3   4  -2   44.08    3.90
   3   4  -2   44.22    3.47
   2   4  -2   13.99    1.23
   2   4  -2   13.79    1.22
   2   4  -2   13.51    1.09
  -2  -4   2   16.28    1.62
  -1  -4   2   11.90    1.34
  -1   4  -2   20.91    1.62
  -1   4  -2   18.20    1.64
  -1   4  -2   18.35    1.46
   1  -4   2   19.52    2.14
  -2   4  -2    4.49    0.40
  -2   4  -2    4.29    0.35
   2  -4   2    4.72    0.38
   2  -4   2    3.78    0.52
  -3   4  -2   20.45    1.66
  -3   4  -2   20.55    1.87
   3  -4   2   24.70    1.84
  -5   4  -2   31.86    2.26
   5  -4   2   28.04    3.34
  -6   4  -2    5.53    0.60
   6  -4   2    7.00    0.59
   6  -4   2    7.58    0.83
   7  -4   2    4.19    0.39
   7  -4   2    3.23    0.62
  -8   4  -2   28.36    2.60
   8  -4   2   29.25    2.59
   8  -4   2   34.60    3.45
   9  -4   2   15.31    1.40
   9  -4   2   17.26    1.90
  10  -4   2    2.83    0.47
  10  -4   2    2.16    0.30
  11  -4   2   -0.27    0.34
  11  -4   2   -0.19    0.16
  12  -4   2    3.28    0.40
  12  -4   2    3.41    0.64
  13  -4   2    0.11    0.46
  13  -4   2    0.14    0.22
  14  -4   2    1.90    0.60
  15  -4   2   -0.11    0.58
  16  -4   2   -0.79    0.63
  17  -4   2   -0.72    0.68
  16   3  -2    0.14    0.65
  15   3  -2   -0.06    0.58
  15   3  -2    0.79    0.26
  14   3  -2    0.19    0.23
  14   3  -2    0.43    0.54
  13   3  -2    0.58    0.50
  13   3  -2    0.30    0.23
  12   3  -2    1.42    0.28
  12   3  -2    2.02    0.53
  11   3  -2    1.48    0.26
  11   3  -2    1.32    0.48
  10   3  -2    4.17    0.75
  10   3  -2    4.35    0.47
   9   3  -2    2.97    0.37
   8   3  -2    3.61    0.40
   8   3  -2    3.86    0.61
   7   3  -2    0.37    0.13
   7   3  -2    0.31    0.27
   6   3  -2    7.77    1.06
   6   3  -2    9.26    0.75
   5   3  -2    5.39    0.67
   5   3  -2    5.00    0.48
   5   3  -2    4.93    0.45
   4   3  -2   55.67    4.38
   4   3  -2   48.92    4.41
   4   3  -2   53.89    5.78
   4   3  -2   50.30    3.92
   3   3  -2   50.36    5.62
   3   3  -2   48.57    3.81
   3   3  -2   53.49    4.26
   2   3  -2    0.49    0.07
   2   3  -2    0.49    0.08
   1   3  -2   45.41    3.36
   1   3  -2   44.12    3.75
   0   3  -2    1.80    0.18
   0   3  -2    2.29    0.18
  -1   3  -2   17.03    1.34
  -1   3  -2   18.37    1.48
   2  -3   2   42.63    4.71
  -3   3  -2  274.60   20.56
   3  -3   2  273.73   30.22
   4  -3   2    6.22    0.52
   4  -3   2    5.51    0.71
   5  -3   2   10.13    0.90
   5  -3   2   10.88    1.21
   6  -3   2   15.49    1.66
   6  -3   2   13.53    1.23
   7  -3   2    6.96    0.88
   7  -3   2    6.57    0.61
   8  -3   2   42.61    3.74
   8  -3   2   46.39    4.97
   9  -3   2   12.00    1.51
   9  -3   2   13.33    1.11
  10  -3   2    4.80    0.78
  10  -3   2    5.28    0.51
  11  -3   2    1.49    0.45
  11  -3   2    1.30    0.25
  12  -3   2    5.26    0.95
  12  -3   2    6.36    0.61
  13  -3   2    0.76    0.51
  13  -3   2    0.74    0.23
  14  -3   2    0.15    0.53
  14  -3   2    0.89    0.24
  15  -3   2   -0.62    0.59
  16  -3   2   -0.67    0.63
  17  -3   2   -0.35    0.67
  17   2  -2    0.22    0.68
  16   2  -2    0.22    0.25
  16   2  -2    0.73    0.64
  15   2  -2    1.59    0.63
  15   2  -2    2.20    0.36
  14   2  -2   -0.15    0.21
  14   2  -2    0.22    0.51
  13   2  -2    1.24    0.27
  13   2  -2    1.63    0.53
  12   2  -2    0.92    0.45
  12   2  -2    0.58    0.22
  11   2  -2    1.72    0.46
  10   2  -2    9.40    0.83
  10   2  -2    8.20    1.14
   9   2  -2    7.37    0.94
   9   2  -2    6.60    0.66
   8   2  -2    3.11    0.36
   8   2  -2    3.04    0.48
   7   2  -2   23.60    2.21
   7   2  -2   28.58    2.94
   6   2  -2    1.87    0.26
   5   2  -2   17.65    1.69
   5   2  -2   22.33    2.25
   4   2  -2    0.56    0.10
   4   2  -2    0.95    0.17
   3   2  -2  219.17   25.60
   3   2  -2  222.20   17.40
   3   2  -2  255.32   19.40
   2   2  -2   19.83    1.55
   2   2  -2   21.14    1.74
   2   2  -2   20.90    2.29
   1   2  -2   57.92    4.29
   1   2  -2   56.52    4.79
   0   2  -2   24.00    2.04
   0   2  -2   24.79    1.84
  -1   2  -2    0.26    0.05
  -2   2  -2   27.03    2.03
  -3   2  -2    2.23    0.19
   3  -2   2    2.03    0.31
  -4   2  -2    1.06    0.10
   4  -2   2    0.69    0.10
   5  -2   2    6.59    0.58
   6  -2   2   24.06    2.10
   6  -2   2   25.74    2.80
   7  -2   2   55.73    4.25
   7  -2   2   45.19    5.62
   8  -2   2   -0.67    0.29
   8  -2   2    0.13    0.13
   9  -2   2   14.19    1.26
   9  -2   2   14.85    1.71
  10  -2   2    4.96    0.51
  10  -2   2    5.31    0.81
  11  -2   2    2.72    0.55
  11  -2   2    2.31    0.32
  12  -2   2    2.07    0.60
  12  -2   2    3.40    0.41
  13  -2   2    0.23    0.20
  13  -2   2   -0.03    0.50
  14  -2   2    0.40    0.56
  14  -2   2    1.21    0.25
  15  -2   2   -0.93    0.57
  16  -2   2   -0.21    0.64
  17  -2   2   -0.30    0.69
  17   1  -2    0.10    0.65
  16   1  -2    0.67    0.29
  16   1  -2    1.13    0.61
  15   1  -2    1.82    0.33
  15   1  -2    0.54    0.56
  14   1  -2    0.07    0.48
  14   1  -2   -0.04    0.23
  13   1  -2    2.97    0.59
  13   1  -2    2.38    0.37
  12   1  -2   12.58    1.56
  11   1  -2    1.90    0.32
  11   1  -2    2.32    0.50
  10   1  -2    4.85    0.75
  10   1  -2    4.43    0.49
   8   1  -2   32.48    3.91
   8   1  -2   37.26    2.96
   7   1  -2    3.63    0.39
   7   1  -2    3.91    0.59
   4   1  -2    3.25    0.32
   4   1  -2    3.54    0.44
   3   1  -2   47.92    5.30
   2   1  -2   14.22    1.12
   2   1  -2   15.57    1.26
   1   1  -2   19.73    1.52
   1   1  -2   20.59    1.69
   0   1  -2    1.95    0.17
   0   1  -2    1.83    0.16
  -1   1  -2   79.68    5.97
   2  -1   2    2.80    0.24
   3  -1   2   17.09    1.44
   3  -1   2   17.04    1.91
   4  -1   2    2.57    0.24
   5  -1   2   11.37    1.21
   5  -1   2    9.66    0.89
   6  -1   2    8.01    0.68
   6  -1   2    7.26    0.94
   7  -1   2    9.62    0.85
   8  -1   2    5.79    0.55
   9  -1   2   12.84    1.53
  10  -1   2    1.11    0.20
  10  -1   2    1.76    0.43
  11  -1   2   -0.03    0.15
  11  -1   2   -0.38    0.41
  12  -1   2   35.31    2.73
  12  -1   2   28.20    3.64
  13  -1   2    0.37    0.19
  13  -1   2    0.27    0.50
  14  -1   2    0.47    0.21
  14  -1   2   -0.70    0.53
  15  -1   2    0.42    0.21
  15  -1   2    0.10    0.60
  16  -1   2    0.78    0.66
  17  -1   2   -0.47    0.67
  17   0  -2    0.22    0.62
  16   0  -2    0.91    0.58
  16   0  -2    0.01    0.25
  15   0  -2    0.42    0.26
  15   0  -2   -0.05    0.52
  14   0  -2   -0.32    0.47
  14   0  -2   -0.03    0.23
  13   0  -2    2.35    0.57
  13   0  -2    2.32    0.35
  12   0  -2   14.13    1.45
  12   0  -2   18.89    1.95
  11   0  -2    0.69    0.40
  11   0  -2    0.72    0.22
  10   0  -2    3.33    0.60
  10   0  -2    4.53    0.44
   9   0  -2    3.84    0.43
   8   0  -2   56.56    6.83
   8   0  -2   66.52    5.18
   7   0  -2    2.14    0.27
   6   0  -2   15.43    1.33
   5   0  -2   10.57    0.98
   5   0  -2   12.09    1.30
   4   0  -2    1.62    0.26
   4   0  -2    1.26    0.17
   3   0  -2    5.89    0.52
   2   0  -2    2.62    0.23
  -2   0   2    2.26    0.19
   1   0  -2   94.86    7.93
  -1   0   2   94.94    7.11
   0   0  -2    9.27    0.78
   0   0   2    9.26    0.70
   1   0   2   26.94    2.07
   1   0   2   28.18    2.31
   2   0   2   20.43    1.73
   2   0   2   20.83    1.55
   3   0   2    4.48    0.36
   3   0   2    5.19    0.40
   3   0   2    3.77    0.54
   4   0   2   13.24    1.47
   4   0   2   12.79    1.10
   5   0   2   10.92    1.37
   5   0   2   13.08    1.03
   6   0   2    0.87    0.14
   6   0   2    0.79    0.27
   7   0   2    4.81    0.65
   7   0   2    4.68    0.45
   8   0   2    6.21    0.58
   9   0   2   10.32    1.22
   9   0   2    9.39    0.88
  10   0   2    7.20    1.00
  10   0   2    6.56    0.64
  11   0   2    4.95    0.74
  11   0   2    3.50    0.44
  12   0   2   23.66    1.99
  12   0   2   22.26    2.69
  13   0   2    1.02    0.54
  13   0   2    0.69    0.21
  14   0   2    0.04    0.56
  14   0   2    1.33    0.25
  15   0   2    1.48    0.27
  15   0   2    1.28    0.63
  16   0   2    1.08    0.66
  17   0   2    0.18    0.67
  17  -1  -2   -0.57    0.59
  17  -1  -2    0.10    0.29
  16  -1  -2    0.20    0.56
  16  -1  -2    0.21    0.27
  15  -1  -2   -0.29    0.50
  15  -1  -2    0.14    0.26
  14  -1  -2    1.29    0.53
  14  -1  -2    0.86    0.30
  13  -1  -2   -0.32    0.43
  13  -1  -2    0.20    0.23
  12  -1  -2    0.91    0.25
  12  -1  -2    1.67    0.46
  11  -1  -2   -0.20    0.36
  11  -1  -2   -0.33    0.17
  10  -1  -2    5.84    0.57
  10  -1  -2    5.25    0.83
   9  -1  -2   12.95    1.29
   9  -1  -2   16.69    1.74
   8  -1  -2    0.41    0.28
   7  -1  -2   19.47    1.80
   7  -1  -2   22.80    2.39
   6  -1  -2   26.69    2.44
   6  -1  -2   30.90    3.22
   5  -1  -2    8.20    0.84
   5  -1  -2   11.31    1.12
   4  -1  -2    1.55    0.19
   3  -1  -2   45.47    3.81
   2  -1  -2    1.69    0.17
  -2   1   2    1.55    0.14
   1  -1  -2    0.72    0.10
  -1   1   2    0.91    0.09
   0   1   2    9.67    0.73
   1   1   2   58.06    4.76
   1   1   2   55.88    4.27
   2   1   2   55.11    4.65
   2   1   2   56.12    4.17
   3   1   2   30.82    3.63
   3   1   2   30.09    2.46
   3   1   2   37.35    2.75
   4   1   2   26.99    1.98
   4   1   2   25.59    2.23
   5   1   2   33.43    2.43
   5   1   2   30.82    2.71
   5   1   2   31.61    2.73
   5   1   2   33.02    3.60
   6   1   2    4.11    0.36
   6   1   2    3.64    0.37
   6   1   2    3.05    0.58
   7   1   2   32.22    2.75
   7   1   2   32.94    3.66
   8   1   2    0.58    0.32
   8   1   2    0.25    0.12
   9   1   2   13.56    1.53
   9   1   2   11.56    1.09
  10   1   2    9.02    0.81
  10   1   2    8.37    1.14
  11   1   2    0.50    0.19
  11   1   2    0.95    0.47
  12   1   2    0.68    0.49
  12   1   2    0.79    0.21
  13   1   2    0.27    0.19
  13   1   2   -0.50    0.49
  14   1   2    1.34    0.25
  14   1   2    0.38    0.55
  15   1   2    0.49    0.60
  15   1   2    0.94    0.25
  16   1   2    0.40    0.64
  16   1   2    0.50    0.24
  17  -2  -2   -0.10    0.28
  17  -2  -2   -0.41    0.60
  16  -2  -2   -0.26    0.54
  16  -2  -2   -0.16    0.28
  15  -2  -2   -0.05    0.52
  15  -2  -2    0.02    0.24
  14  -2  -2    0.01    0.49
  14  -2  -2    0.07    0.22
  13  -2  -2    0.76    0.48
  13  -2  -2    0.93    0.27
  12  -2  -2    2.30    0.55
  12  -2  -2    2.67    0.36
  11  -2  -2   -0.12    0.18
  11  -2  -2   -0.31    0.36
  10  -2  -2    5.52    0.54
  10  -2  -2    4.92    0.81
   9  -2  -2    3.07    0.36
   8  -2  -2   51.85    5.79
   8  -2  -2   52.28    4.39
   7  -2  -2   15.93    1.86
   7  -2  -2   16.56    1.41
   6  -2  -2   17.10    1.52
   6  -2  -2   18.46    2.01
   5  -2  -2   15.47    1.30
   5  -2  -2   14.94    1.71
   4  -2  -2    1.34    0.17
   4  -2  -2    1.40    0.25
   3  -2  -2  185.88   14.84
  -3   2   2  169.37   13.31
   2  -2  -2   28.63    2.18
  -2   2   2   23.27    1.95
   0   2   2    0.18    0.05
   0   2   2    0.35    0.05
   1   2   2   66.80    5.23
   1   2   2   61.10    4.69
   1   2   2   59.64    5.28
   2   2   2    5.02    0.40
   2   2   2    5.52    0.45
   2   2   2    4.80    0.45
   3   2   2   41.27    3.19
   3   2   2   38.35    4.22
   3   2   2   35.92    3.22
   3   2   2   36.67    2.86
   4   2   2   20.22    1.99
   4   2   2   27.22    1.78
   4   2   2   25.80    2.01
   4   2   2   20.98    2.64
   5   2   2    1.30    0.14
   5   2   2    0.65    0.11
   5   2   2    0.79    0.13
   5   2   2    0.72    0.26
   6   2   2    0.10    0.10
   6   2   2    0.07    0.07
   6   2   2   -0.09    0.09
   6   2   2   -0.02    0.25
   7   2   2    0.91    0.13
   7   2   2    0.93    0.16
   7   2   2    0.82    0.32
   8   2   2    1.26    0.20
   8   2   2    1.91    0.40
   9   2   2    3.34    0.53
   9   2   2    2.19    0.32
  10   2   2    9.45    1.21
  10   2   2    9.31    0.86
  11   2   2    1.17    0.45
  11   2   2    0.60    0.20
  12   2   2    3.37    0.43
  12   2   2    4.23    0.73
  13   2   2    0.06    0.52
  13   2   2    0.59    0.22
  14   2   2    0.63    0.23
  14   2   2    0.36    0.56
  15   2   2    0.01    0.57
  15   2   2    0.13    0.22
  16   2   2   -0.06    0.23
  16   2   2    0.02    0.62
  17  -3  -2   -0.23    0.27
  17  -3  -2   -0.49    0.58
  16  -3  -2    0.27    0.26
  16  -3  -2   -0.31    0.55
  15  -3  -2   -0.33    0.53
  15  -3  -2    0.31    0.24
  14  -3  -2    0.72    0.52
  14  -3  -2    0.89    0.29
  13  -3  -2    0.19    0.24
  13  -3  -2   -0.13    0.46
  12  -3  -2    4.77    0.76
  12  -3  -2    3.62    0.49
  11  -3  -2    0.16    0.19
  11  -3  -2    0.29    0.37
  10  -3  -2    4.24    0.63
  10  -3  -2    4.16    0.46
   9  -3  -2   26.97    2.39
   9  -3  -2   29.06    3.17
   8  -3  -2   29.53    3.29
   8  -3  -2   29.01    2.49
   7  -3  -2    0.27    0.21
   7  -3  -2   -0.06    0.12
   6  -3  -2    8.82    0.94
   6  -3  -2    6.87    0.70
   5  -3  -2   16.26    2.05
   5  -3  -2   20.59    1.57
   4  -3  -2   15.71    1.28
   4  -3  -2   16.12    1.68
  -4   3   2   14.50    1.14
  -4   3   2   13.86    1.28
   3  -3  -2   44.32    3.68
  -3   3   2   44.41    3.71
  -3   3   2   42.74    3.29
   2  -3  -2    1.10    0.13
  -2   3   2    1.23    0.13
  -2   3   2    1.24    0.12
   1  -3  -2   17.06    1.33
  -1   3   2   15.28    1.19
  -1   3   2   14.86    1.34
   0   3   2   45.80    3.83
   0   3   2   45.63    3.43
   1   3   2    5.68    0.45
   1   3   2    5.77    0.50
   1   3   2    5.96    0.51
   2   3   2   10.26    0.90
   2   3   2    9.73    0.80
   2   3   2   10.86    0.89
   2   3   2   10.86    1.18
   3   3   2   42.75    3.28
   3   3   2   45.74    3.66
   3   3   2   41.89    3.69
   3   3   2   44.03    4.83
   5   3   2    6.55    0.63
   5   3   2    6.80    0.89
   5   3   2    7.87    0.64
   5   3   2    7.07    0.56
   6   3   2    0.27    0.11
   6   3   2   -0.08    0.25
   6   3   2    0.21    0.09
   6   3   2    0.21    0.10
   7   3   2    0.75    0.12
   7   3   2    0.86    0.32
   7   3   2    1.02    0.16
   7   3   2    0.86    0.14
   8   3   2    2.99    0.36
   8   3   2    3.22    0.31
   8   3   2    3.01    0.36
   8   3   2    4.60    0.58
   9   3   2    6.22    0.61
   9   3   2    6.48    0.94
  10   3   2    2.67    0.57
  10   3   2    2.60    0.34
  11   3   2    2.65    0.35
  11   3   2    2.74    0.59
  12   3   2    0.50    0.48
  13   3   2    2.48    0.65
  13   3   2    2.88    0.38
  14   3   2    1.00    0.60
  14   3   2    2.06    0.32
  15   3   2    0.77    0.25
  15   3   2   -0.17    0.60
  16   3   2    0.05    0.67
  17  -4  -2   -0.25    0.61
  17  -4  -2    0.04    0.28
  16  -4  -2   -0.04    0.57
  16  -4  -2    0.33    0.27
  15  -4  -2   -0.43    0.53
  15  -4  -2    0.16    0.24
  14  -4  -2   -0.05    0.25
  14  -4  -2   -0.56    0.49
  13  -4  -2    2.79    0.39
  13  -4  -2    1.93    0.58
  12  -4  -2   21.50    2.38
  12  -4  -2   19.39    1.79
  11  -4  -2    0.18    0.19
  11  -4  -2    0.72    0.37
  10  -4  -2    4.64    0.74
  10  -4  -2    5.65    0.54
   9  -4  -2    7.54    0.79
   9  -4  -2   10.05    1.10
   8  -4  -2    2.72    0.35
   8  -4  -2    2.91    0.52
   7  -4  -2   10.22    1.16
   7  -4  -2    9.16    0.86
   6  -4  -2   18.77    1.70
   6  -4  -2   23.23    2.24
  -6   4   2   18.61    1.70
  -6   4   2   19.28    1.51
   5  -4  -2    5.93    0.67
   5  -4  -2    5.67    0.51
  -5   4   2    5.33    0.44
  -5   4   2    5.15    0.49
   4  -4  -2    8.28    0.95
   4  -4  -2    8.92    0.73
  -4   4   2    7.90    0.72
  -4   4   2    7.98    0.64
   3  -4  -2   44.09    3.93
  -3   4   2   47.90    3.52
  -3   4   2   48.43    3.96
  -2   4   2    4.62    0.42
  -1   4   2   29.92    2.27
  -1   4   2   30.22    2.55
   0   4   2    4.26    0.35
   0   4   2    4.47    0.39
   1   4   2    2.20    0.18
   1   4   2    1.55    0.19
   1   4   2    2.05    0.27
   1   4   2    1.62    0.21
   2   4   2   32.50    3.01
   2   4   2   36.35    2.70
   2   4   2   38.37    3.97
   2   4   2   35.92    3.04
   3   4   2    7.84    0.77
   3   4   2    8.70    1.04
   3   4   2    9.06    0.68
   3   4   2    9.50    0.77
   4   4   2    3.93    0.34
   4   4   2    3.52    0.39
   4   4   2    4.17    0.58
   4   4   2    4.48    0.39
   5   4   2   73.97    5.54
   5   4   2   75.95    6.19
   5   4   2   73.02    8.17
   5   4   2   72.01    6.24
   6   4   2    5.21    0.82
   6   4   2    5.34    0.56
   6   4   2    7.24    0.57
   7   4   2   20.16    1.71
   7   4   2   20.21    2.29
   7   4   2   19.27    1.70
   7   4   2   19.90    1.52
   8   4   2    0.61    0.36
   8   4   2    0.81    0.17
   8   4   2    0.77    0.15
   8   4   2    0.67    0.13
   9   4   2    7.56    0.73
   9   4   2    8.25    1.09
  10   4   2    5.38    0.93
  10   4   2    5.44    0.56
  11   4   2   -0.14    0.44
  11   4   2    0.06    0.18
  12   4   2    0.39    0.52
  12   4   2    0.68    0.22
  13   4   2    2.36    0.35
  13   4   2    1.64    0.64
  14   4   2    1.11    0.28
  14   4   2    0.36    0.60
  15   4   2    0.61    0.26
  15   4   2    0.11    0.64
  17  -5  -2   -0.49    0.60
  17  -5  -2    0.11    0.28
  16  -5  -2    0.25    0.58
  16  -5  -2    1.24    0.35
  15  -5  -2    0.42    0.26
  15  -5  -2   -0.69    0.54
  14  -5  -2   -0.72    0.49
  14  -5  -2   -0.10    0.25
  13  -5  -2    2.24    0.36
  13  -5  -2    1.84    0.55
  12  -5  -2   13.92    1.59
  12  -5  -2   11.93    1.17
  11  -5  -2    4.70    0.67
  11  -5  -2    3.44    0.48
  10  -5  -2    8.32    0.75
  10  -5  -2    7.17    1.03
   9  -5  -2   -0.02    0.15
   9  -5  -2   -0.19    0.25
   8  -5  -2    4.05    0.41
   8  -5  -2    3.04    0.60
   7  -5  -2   -0.10    0.12
   7  -5  -2   -0.18    0.17
  -7   5   2    0.21    0.10
   6  -5  -2    0.82    0.16
   6  -5  -2    1.12    0.20
  -6   5   2    0.76    0.13
  -6   5   2    0.87    0.12
   5  -5  -2   11.13    1.26
   5  -5  -2   11.40    0.96
  -5   5   2   10.93    0.85
  -5   5   2   10.65    0.96
   4  -5  -2    1.51    0.23
   4  -5  -2    1.62    0.19
  -4   5   2    1.68    0.18
  -4   5   2    1.84    0.19
   3  -5  -2   11.52    1.09
   3  -5  -2   10.78    1.43
  -3   5   2   14.13    0.98
  -3   5   2   14.91    1.11
  -2   5   2   37.54    3.45
  -2   5   2   43.96    3.07
   1  -5  -2   42.01    4.35
  -1   5   2   37.02    3.33
  -1   5   2   38.84    2.96
   0  -5  -2   13.84    1.63
   0   5   2   15.34    1.26
   0   5   2   14.60    1.24
   0   5   2   14.65    1.11
  -1  -5  -2   16.39    1.81
   1   5   2   15.98    1.37
   1   5   2   16.29    1.23
   1   5   2   15.86    1.39
   2   5   2   32.02    2.76
   2   5   2   34.52    3.62
   2   5   2   30.98    2.45
   3   5   2    5.02    0.45
   3   5   2    5.30    0.47
   3   5   2    4.22    0.67
   4   5   2   16.03    1.60
   4   5   2   12.08    1.07
   5   5   2   11.04    0.99
   5   5   2   10.73    0.88
   5   5   2   12.39    0.99
   6   5   2   14.29    1.34
   6   5   2   16.03    1.35
   6   5   2   16.11    1.20
   6   5   2   15.68    1.82
   7   5   2    3.93    0.44
   7   5   2    4.13    0.46
   7   5   2    5.52    0.67
   7   5   2    4.34    0.39
   8   5   2    0.59    0.18
   8   5   2    0.88    0.40
   8   5   2    0.79    0.17
   8   5   2    0.71    0.15
   9   5   2    6.07    0.65
   9   5   2    8.37    1.04
  10   5   2    5.58    0.97
  10   5   2    7.08    0.65
  11   5   2    0.24    0.21
  11   5   2    0.46    0.50
  12   5   2    3.66    0.46
  13   5   2    0.04    0.57
  13   5   2    0.10    0.22
  14   5   2    0.14    0.61
  14   5   2    0.53    0.24
  15   5   2   -0.08    0.67
  17  -6  -2   -0.29    0.61
  17  -6  -2    0.39    0.30
  16  -6  -2    0.97    0.61
  15  -6  -2    1.85    0.36
  15  -6  -2    0.01    0.56
  14  -6  -2    0.22    0.51
  14  -6  -2    1.53    0.33
  13  -6  -2    2.17    0.36
  13  -6  -2    1.91    0.53
  12  -6  -2    0.71    0.26
  12  -6  -2    0.43    0.40
  11  -6  -2    3.55    0.46
  10  -6  -2    4.24    0.48
  10  -6  -2    3.70    0.69
   9  -6  -2    4.66    0.59
   9  -6  -2    3.11    0.44
   8  -6  -2    2.76    0.36
   8  -6  -2    3.03    0.43
   7  -6  -2   -0.17    0.18
   7  -6  -2   -0.06    0.12
  -7   6   2    0.08    0.11
  -7   6   2    0.00    0.09
   6  -6  -2    1.80    0.23
  -6   6   2    1.11    0.18
  -6   6   2    1.52    0.18
   5  -6  -2   75.34    6.88
   5  -6  -2   74.79    9.06
  -5   6   2   87.55    6.17
  -5   6   2   90.58    6.94
   4  -6  -2    1.16    0.17
  -4   6   2    1.38    0.18
  -4   6   2    1.60    0.17
   3  -6  -2    9.55    0.79
   3  -6  -2    9.40    1.03
  -3   6   2    8.34    0.71
  -3   6   2    8.71    0.80
   2  -6  -2    4.32    0.40
   2  -6  -2    4.34    0.52
  -2   6   2    4.45    0.37
  -2   6   2    4.01    0.42
   1  -6  -2    8.85    0.98
  -1   6   2    8.78    0.75
  -1   6   2    7.59    0.76
  -1   6   2    9.00    0.67
   0  -6  -2   13.67    1.71
   0   6   2   15.54    1.17
   0   6   2   15.98    1.32
   0   6   2   15.86    1.30
  -1  -6  -2    2.52    0.32
   1   6   2    2.05    0.24
   1   6   2    1.80    0.28
   1   6   2    2.34    0.23
   2   6   2   36.61    3.20
   2   6   2   40.16    3.18
   2   6   2   36.25    2.84
   3   6   2   15.26    1.20
   3   6   2   15.61    1.35
   3   6   2   15.16    1.78
   3   6   2   16.17    1.34
   4   6   2    5.21    0.68
   4   6   2    4.21    0.39
   4   6   2    4.44    0.45
   5   6   2   15.87    1.22
   5   6   2   14.07    1.82
   5   6   2   17.16    1.37
   5   6   2   16.04    1.38
   6   6   2    6.96    0.57
   6   6   2    6.57    0.65
   6   6   2    6.46    0.64
   6   6   2    8.45    0.96
   7   6   2    8.00    0.73
   7   6   2    8.29    1.08
   7   6   2    7.74    0.65
   7   6   2    7.83    0.75
   8   6   2    0.25    0.17
   8   6   2    0.45    0.14
   8   6   2    0.46    0.41
   8   6   2    0.33    0.16
   9   6   2    4.28    0.47
   9   6   2    4.12    0.77
  10   6   2    4.11    0.48
  11   6   2    3.32    0.43
  11   6   2    2.88    0.69
  12   6   2    4.73    0.55
  13   6   2    1.83    0.31
  13   6   2    0.86    0.64
  14   6   2    0.36    0.24
  14   6   2    0.21    0.65
  16  -7  -2    1.54    0.40
  15  -7  -2    2.16    0.39
  15  -7  -2    0.24    0.55
  14  -7  -2    0.77    0.50
  14  -7  -2    1.04    0.31
  13  -7  -2    0.35    0.26
  13  -7  -2    0.05    0.42
  12  -7  -2    0.52    0.38
  12  -7  -2    0.63    0.26
  11  -7  -2    4.09    0.62
  11  -7  -2    3.33    0.46
  10  -7  -2    1.04    0.24
  10  -7  -2    0.91    0.33
   9  -7  -2    3.25    0.42
   9  -7  -2    4.04    0.57
   8  -7  -2    6.87    0.87
   8  -7  -2    7.02    0.65
  -8   7   2    5.95    0.62
  -8   7   2    6.95    0.54
   7  -7  -2    3.45    0.50
  -6   7   2    8.21    0.75
   5  -7  -2   16.15    1.82
   5  -7  -2   17.53    1.39
  -5   7   2   15.56    1.24
  -5   7   2   15.16    1.39
   4  -7  -2   12.86    1.50
   4  -7  -2   13.70    1.14
  -4   7   2   13.46    1.02
  -4   7   2   12.64    1.15
   3  -7  -2   19.40    1.55
   3  -7  -2   17.79    2.03
  -3   7   2   17.65    1.57
  -3   7   2   17.78    1.39
  -1   7   2    2.53    0.32
   0   7   2    1.88    0.21
   0   7   2    1.88    0.22
   0   7   2    1.68    0.21
  -1  -7  -2    0.06    0.13
   1   7   2    0.18    0.12
   1   7   2    0.13    0.09
   1   7   2   -0.08    0.09
  -2  -7  -2   19.12    2.22
   2   7   2   20.58    1.71
   2   7   2   19.39    1.51
   2   7   2   20.13    1.69
   3   7   2   18.81    1.35
   3   7   2   16.33    1.52
   4   7   2    0.33    0.11
   4   7   2    0.54    0.15
   4   7   2    0.27    0.11
   5   7   2   30.17    2.30
   5   7   2   29.89    2.57
   5   7   2   29.04    3.40
   5   7   2   32.01    2.60
   6   7   2    6.85    0.78
   6   7   2    4.56    0.51
   6   7   2    5.17    0.45
   6   7   2    4.98    0.53
   7   7   2    5.52    0.47
   7   7   2    5.15    0.80
   7   7   2    4.92    0.52
   7   7   2    4.96    0.55
   8   7   2    0.66    0.21
   8   7   2    0.66    0.19
   8   7   2    0.95    0.17
   8   7   2    1.25    0.45
   9   7   2    0.37    0.47
   9   7   2    0.16    0.18
  10   7   2   -0.21    0.50
  10   7   2    0.55    0.21
  11   7   2    0.99    0.25
  11   7   2    0.18    0.55
  12   7   2    1.21    0.27
  12   7   2    0.26    0.59
  13   7   2    0.54    0.64
  13   7   2    1.00    0.27
  14   7   2    0.23    0.68
  16  -8  -2    0.42    0.31
  15  -8  -2    1.11    0.36
  14  -8  -2    0.55    0.33
  13  -8  -2    1.05    0.46
  13  -8  -2    1.72    0.35
  12  -8  -2    1.24    0.31
  12  -8  -2    0.62    0.38
  11  -8  -2    0.33    0.25
  11  -8  -2    0.16    0.32
  10  -8  -2    7.95    1.08
  10  -8  -2    9.48    0.84
   9  -8  -2    1.69    0.36
   9  -8  -2    2.05    0.31
   8  -8  -2    2.04    0.29
  -8   8   2    2.32    0.23
  -8   8   2    1.70    0.25
   7  -8  -2    5.60    0.59
   7  -8  -2    7.12    0.82
  -7   8   2    6.25    0.52
  -7   8   2    6.10    0.61
   6  -8  -2    7.48    0.71
  -6   8   2    8.10    0.63
   5  -8  -2    3.97    0.55
   5  -8  -2    3.95    0.40
  -5   8   2    3.63    0.44
  -5   8   2    4.27    0.37
   4  -8  -2    1.72    0.23
   4  -8  -2    1.94    0.28
  -4   8   2    1.89    0.24
  -4   8   2    1.78    0.23
   3  -8  -2   10.62    1.23
   3  -8  -2   10.63    0.94
  -3   8   2   11.17    0.96
  -3   8   2   10.49    0.84
   2  -8  -2    8.23    0.88
   2  -8  -2   12.16    1.17
   1  -8  -2    7.16    0.84
  -1   8   2    6.76    0.65
  -1   8   2    6.93    0.57
  -1   8   2    7.02    0.63
   0  -8  -2    0.81    0.20
   0   8   2    0.73    0.14
   0   8   2    0.77    0.16
   0   8   2    0.87    0.14
  -1  -8  -2    1.66    0.26
   1   8   2    1.55    0.21
   1   8   2    1.55    0.22
   1   8   2    1.80    0.20
  -2  -8  -2   20.22    2.69
   2   8   2   25.14    1.84
   2   8   2   23.77    2.05
   2   8   2   27.66    2.08
  -3  -8  -2    2.59    0.44
   3   8   2    2.41    0.28
   3   8   2    2.57    0.30
   3   8   2    2.67    0.35
   4   8   2    2.65    0.26
   4   8   2    2.18    0.29
   4   8   2    1.94    0.28
   5   8   2   10.39    0.91
   5   8   2    9.59    1.23
   5   8   2   10.26    0.94
   5   8   2   10.41    0.82
   6   8   2    3.68    0.59
   6   8   2    2.35    0.30
   6   8   2    2.18    0.32
   6   8   2    2.64    0.33
   7   8   2   -0.16    0.18
   7   8   2    0.07    0.17
   7   8   2   -0.10    0.14
   7   8   2    0.66    0.44
   8   8   2    2.00    0.30
   8   8   2    1.62    0.54
   8   8   2    2.08    0.30
   9   8   2    0.88    0.22
   9   8   2    0.60    0.53
  10   8   2    0.08    0.54
  10   8   2    0.66    0.22
  11   8   2   -0.07    0.21
  11   8   2   -0.15    0.57
  12   8   2    0.27    0.23
  12   8   2    0.49    0.62
  13   8   2   -0.32    0.67
  15  -9  -2    1.52    0.40
  14  -9  -2    0.59    0.33
  13  -9  -2    3.62    0.50
  12  -9  -2    0.50    0.28
  11  -9  -2    3.43    0.46
  10  -9  -2    5.89    0.64
   9  -9  -2    3.92    0.49
   9  -9  -2    4.74    0.71
   8  -9  -2    3.42    0.55
   8  -9  -2    2.02    0.31
  -8   9   2    2.70    0.29
  -8   9   2    2.12    0.30
   7  -9  -2   10.46    0.96
   7  -9  -2   12.21    1.28
  -7   9   2   10.12    0.97
  -7   9   2   10.03    0.85
   6  -9  -2   11.92    1.21
   6  -9  -2    9.37    0.92
  -6   9   2    9.62    0.82
   5  -9  -2   11.34    1.14
   5  -9  -2   11.86    1.51
  -5   9   2   16.41    1.04
   4  -9  -2    0.12    0.11
  -4   9   2    0.12    0.15
  -4   9   2    0.17    0.12
   3  -9  -2    3.66    0.50
   3  -9  -2    3.56    0.37
   2  -9  -2   11.98    1.34
   2  -9  -2   11.45    1.02
   1  -9  -2    0.78    0.20
  -1   9   2    0.64    0.15
  -1   9   2    0.59    0.17
  -1   9   2    1.00    0.16
   0  -9  -2    1.84    0.32
   0   9   2    2.48    0.26
   0   9   2    2.57    0.27
   0   9   2    2.80    0.35
  -1  -9  -2   14.97    1.57
   1   9   2   13.21    1.21
   1   9   2   13.91    1.19
   1   9   2   12.57    1.07
  -2  -9  -2    3.63    0.58
   2   9   2    4.48    0.40
   2   9   2    4.59    0.49
   2   9   2    4.54    0.43
  -3  -9  -2    0.33    0.22
   3   9   2    0.21    0.17
   3   9   2    0.46    0.15
   3   9   2    0.39    0.15
  -4  -9  -2    4.63    0.60
   4   9   2    3.46    0.39
   5   9   2    2.59    0.29
   5   9   2    1.40    0.26
   6   9   2    0.35    0.17
   6   9   2    0.21    0.20
   6   9   2    0.22    0.16
   7   9   2    2.55    0.33
   7   9   2    2.47    0.33
   7   9   2    2.57    0.29
   7   9   2    1.79    0.51
   8   9   2    1.00    0.27
   8   9   2    1.15    0.25
   9   9   2    3.93    0.47
  10   9   2    1.09    0.58
  10   9   2    0.33    0.22
  11   9   2    2.17    0.33
  11   9   2    0.49    0.63
  12   9   2    0.49    0.65
  14 -10  -2   -0.33    0.31
  13 -10  -2    0.28    0.32
  12 -10  -2    1.12    0.33
  11 -10  -2    4.18    0.54
  10 -10  -2   10.05    0.95
   9 -10  -2    0.07    0.20
   8 -10  -2    3.14    0.43
  -8  10   2    3.79    0.46
  -8  10   2    3.80    0.37
  -7  10   2   10.11    0.91
  -7  10   2    9.44    0.79
   6 -10  -2    3.88    0.41
  -6  10   2    3.52    0.47
  -6  10   2    3.75    0.38
   5 -10  -2    6.50    0.90
   5 -10  -2    5.85    0.66
  -5  10   2    8.82    0.62
  -5  10   2    8.13    0.71
   4 -10  -2    0.26    0.19
   4 -10  -2    0.27    0.14
  -4  10   2    0.80    0.19
   3 -10  -2    3.75    0.57
   3 -10  -2    4.72    0.41
  -3  10   2    3.41    0.47
  -3  10   2    4.16    0.39
   1 -10  -2    5.06    0.56
  -1  10   2    3.18    0.48
  -1  10   2    3.90    0.40
   0  10   2   10.29    1.00
   0  10   2   11.58    0.91
   0  10   2   12.55    1.04
  -1 -10  -2   19.05    1.90
   1  10   2   15.12    1.29
   1  10   2   15.51    1.47
   1  10   2   16.94    1.44
  -2 -10  -2    2.58    0.36
   2  10   2    2.01    0.29
   2  10   2    1.58    0.30
   2  10   2    2.77    0.29
  -3 -10  -2    3.98    0.57
   3  10   2    3.63    0.38
   3  10   2    4.10    0.41
   3  10   2    3.51    0.48
   4  10   2    0.81    0.22
   4  10   2    0.53    0.16
   4  10   2    0.66    0.18
  -5 -10  -2    8.05    1.03
   5  10   2    8.21    0.81
   5  10   2    8.07    0.69
   5  10   2    8.65    0.78
   6  10   2    0.61    0.20
   6  10   2    0.56    0.19
   6  10   2    0.18    0.23
   7  10   2   -0.18    0.17
   7  10   2   -0.02    0.17
   7  10   2    0.02    0.22
   8  10   2    0.15    0.18
   9  10   2    0.23    0.21
   9  10   2    0.59    0.51
  10  10   2    0.25    0.22
  10  10   2    0.73    0.53
  11  10   2    0.75    0.64
  14 -11  -2    0.54    0.37
  13 -11  -2    1.86    0.40
  12 -11  -2    3.28    0.48
  11 -11  -2    0.47    0.29
  10 -11  -2    1.10    0.29
   9 -11  -2    4.57    0.52
   8 -11  -2    0.25    0.19
  -8  11   2   -0.09    0.20
  -8  11   2    0.15    0.16
   7 -11  -2   -0.03    0.17
  -7  11   2   -0.13    0.16
  -7  11   2    0.10    0.21
   6 -11  -2    0.26    0.17
  -6  11   2   -0.17    0.16
  -6  11   2   -0.29    0.20
   5 -11  -2    0.14    0.14
  -5  11   2   -0.18    0.21
  -5  11   2   -0.06    0.16
   4 -11  -2    0.85    0.18
  -4  11   2    0.95    0.20
  -4  11   2    0.81    0.24
   3 -11  -2    8.08    0.73
  -3  11   2    7.63    0.67
  -3  11   2    8.11    0.78
   2 -11  -2    0.93    0.19
   2 -11  -2    1.42    0.26
   1 -11  -2    5.03    0.64
  -1  11   2    4.85    0.46
  -1  11   2    3.90    0.42
  -1  11   2    4.42    0.53
   0  11   2    1.52    0.23
   0  11   2    2.17    0.29
   0  11   2    2.55    0.28
  -1 -11  -2    0.11    0.20
   1  11   2   -0.04    0.19
   1  11   2    0.08    0.15
   1  11   2    0.39    0.15
  -2 -11  -2    2.89    0.39
   2  11   2    1.64    0.31
   2  11   2    2.39    0.30
   2  11   2    2.10    0.29
  -3 -11  -2    0.10    0.22
   3  11   2   -0.14    0.15
   3  11   2   -0.02    0.15
   3  11   2   -0.41    0.19
  -4 -11  -2    0.91    0.28
   4  11   2    0.71    0.21
   4  11   2    0.87    0.20
   4  11   2    0.52    0.24
  -5 -11  -2   -0.12    0.26
   5  11   2    0.15    0.17
   5  11   2   -0.14    0.22
   5  11   2    0.08    0.18
  -6 -11  -2    1.07    0.32
   6  11   2    0.99    0.24
   6  11   2    0.56    0.26
   6  11   2    0.89    0.23
  -7 -11  -2    1.99    0.41
   7  11   2    1.36    0.31
   7  11   2    1.70    0.26
   7  11   2    2.25    0.31
   8  11   2    0.49    0.22
   9  11   2    0.21    0.21
  13 -12  -2    1.82    0.41
  12 -12  -2    0.65    0.33
  11 -12  -2    0.02    0.28
  10 -12  -2    0.60    0.26
   9 -12  -2    1.49    0.29
   8 -12  -2    0.83    0.23
  -8  12   2    0.33    0.24
  -8  12   2    0.60    0.20
   7 -12  -2    2.36    0.35
  -7  12   2    3.20    0.34
  -7  12   2    2.73    0.39
   6 -12  -2    1.25    0.22
  -6  12   2    0.72    0.26
  -6  12   2    1.06    0.22
   5 -12  -2    5.78    0.64
  -5  12   2    7.36    0.72
  -5  12   2    7.54    0.60
   4 -12  -2    0.54    0.18
  -4  12   2    0.68    0.25
  -4  12   2    0.53    0.20
   3 -12  -2    0.82    0.18
  -3  12   2    0.65    0.20
  -3  12   2    0.55    0.24
   2 -12  -2    0.57    0.18
  -2  12   2    1.08    0.19
  -2  12   2    1.34    0.26
  -1  12   2   -0.40    0.22
  -1  12   2   -0.24    0.18
   0  12   2   -0.40    0.21
   0  12   2   -0.37    0.16
   0  12   2    0.20    0.15
  -1 -12  -2    2.97    0.53
   1  12   2    3.06    0.34
   1  12   2    2.67    0.35
   1  12   2    2.59    0.38
  -2 -12  -2    0.22    0.23
   2  12   2    0.09    0.15
   2  12   2   -0.10    0.16
   2  12   2    0.01    0.21
  -3 -12  -2    0.11    0.26
   3  12   2    0.16    0.22
   3  12   2    0.36    0.17
   3  12   2    0.36    0.18
  -4 -12  -2   -0.25    0.24
   4  12   2    0.17    0.17
   4  12   2   -0.37    0.17
   4  12   2    0.02    0.23
  -5 -12  -2   -0.14    0.26
   5  12   2   -0.08    0.24
   5  12   2    0.01    0.19
   5  12   2    0.04    0.18
  -6 -12  -2    0.27    0.29
   6  12   2    0.50    0.21
   6  12   2    0.30    0.20
   6  12   2    0.34    0.26
  -7 -12  -2    2.54    0.47
   7  12   2    1.80    0.37
   7  12   2    1.85    0.30
   7  12   2    2.98    0.37
  -8 -12  -2    0.24    0.33
   8  12   2   -0.06    0.22
  -9 -12  -2    0.63    0.36
 -10 -12  -2    0.16    0.36
  12 -13  -2    0.72    0.35
  11 -13  -2    0.31    0.29
  10 -13  -2    0.12    0.26
   9 -13  -2    0.72    0.26
   8 -13  -2    4.27    0.53
  -8  13   2    4.51    0.47
  -8  13   2    4.94    0.60
   7 -13  -2    2.49    0.36
  -7  13   2    2.45    0.41
  -7  13   2    3.05    0.35
   6 -13  -2    0.11    0.19
  -6  13   2    0.06    0.19
  -6  13   2   -0.05    0.24
   5 -13  -2    2.31    0.31
  -5  13   2    2.21    0.37
  -5  13   2    2.06    0.30
   4 -13  -2    0.90    0.21
  -4  13   2    0.84    0.22
  -4  13   2    0.96    0.29
   3 -13  -2    0.12    0.16
  -3  13   2    0.25    0.20
  -3  13   2   -0.20    0.25
  -2  13   2    0.87    0.20
  -2  13   2    0.65    0.26
  -1  13   2    0.31    0.24
  -1  13   2    0.40    0.19
   0  13   2    0.91    0.20
   0  13   2    1.03    0.21
   0  13   2    1.20    0.27
   1  13   2    6.16    0.70
   1  13   2    6.25    0.58
   1  13   2    7.04    0.64
   2  13   2   -0.05    0.17
   2  13   2   -0.11    0.17
   2  13   2   -0.29    0.22
   3  13   2    2.31    0.31
   3  13   2    2.18    0.36
   3  13   2    2.58    0.33
   4  13   2    1.32    0.24
   4  13   2    0.63    0.22
  -5 -13  -2    0.28    0.29
   5  13   2    0.20    0.26
   5  13   2    0.37    0.19
   5  13   2    0.39    0.21
  -6 -13  -2    0.19    0.29
   6  13   2   -0.17    0.26
   6  13   2    0.03    0.19
   6  13   2    0.12    0.21
  -7 -13  -2   -0.15    0.30
   7  13   2   -0.32    0.27
   7  13   2    0.04    0.20
   7  13   2    0.04    0.21
  -8 -13  -2    0.39    0.35
  -9 -13  -2   -0.03    0.35
  12 -14  -2    0.71    0.35
  11 -14  -2    0.52    0.31
  10 -14  -2    0.81    0.29
   9 -14  -2    1.68    0.33
   8 -14  -2    0.31    0.23
  -8  14   2    0.20    0.21
  -8  14   2    0.37    0.27
   7 -14  -2    0.20    0.21
  -7  14   2    0.02    0.20
  -7  14   2    0.04    0.27
   6 -14  -2    0.11    0.19
  -6  14   2    0.22    0.27
  -6  14   2    0.13    0.21
   5 -14  -2    0.06    0.19
  -5  14   2   -0.13    0.19
  -5  14   2   -0.48    0.28
   4 -14  -2   -0.04    0.18
  -4  14   2   -0.09    0.19
  -4  14   2   -0.20    0.28
   3 -14  -2    2.01    0.29
  -3  14   2    2.20    0.31
  -3  14   2    1.98    0.37
   2 -14  -2    0.42    0.19
  -2  14   2    0.54    0.21
  -2  14   2    0.87    0.29
  -1  14   2    0.94    0.29
  -1  14   2    1.02    0.23
   0  14   2    6.55    0.65
   0  14   2    5.54    0.54
   0  14   2    4.71    0.55
   1  14   2    0.54    0.20
   1  14   2    0.32    0.19
   1  14   2    0.29    0.24
   2  14   2    0.57    0.27
   2  14   2    0.99    0.22
   2  14   2    0.93    0.23
   3  14   2    1.81    0.28
   3  14   2    1.43    0.25
   3  14   2    1.13    0.29
   4  14   2    0.76    0.27
   4  14   2    0.42    0.21
   4  14   2    0.48    0.20
   5  14   2    0.03    0.27
   5  14   2    0.25    0.21
   5  14   2   -0.17    0.20
   6  14   2   -0.09    0.21
   6  14   2    0.05    0.27
   6  14   2    0.29    0.21
   7  14   2    0.29    0.22
   7  14   2   -0.16    0.29
  11 -15  -2    0.01    0.30
  10 -15  -2    0.47    0.28
   9 -15  -2    0.61    0.28
   8 -15  -2   -0.08    0.23
  -8  15   2   -0.10    0.28
  -8  15   2    0.12    0.23
   7 -15  -2    0.07    0.23
  -7  15   2    0.35    0.29
  -7  15   2    0.66    0.23
   6 -15  -2    1.65    0.29
  -6  15   2    1.48    0.28
  -6  15   2    0.95    0.35
   5 -15  -2    1.40    0.27
  -5  15   2    1.09    0.26
  -5  15   2    1.72    0.37
   4 -15  -2    0.60    0.22
  -4  15   2    1.11    0.33
  -4  15   2    0.77    0.23
   3 -15  -2    1.49    0.27
  -3  15   2    1.93    0.36
  -3  15   2    1.66    0.28
  -2  15   2    1.77    0.34
   1 -15  -2    3.19    0.39
  -1  15   2    3.36    0.38
  -1  15   2    2.41    0.42
   0  15   2    0.25    0.20
   0  15   2    0.31    0.19
   0  15   2    0.51    0.27
   1  15   2    2.39    0.33
   1  15   2    1.66    0.34
   1  15   2    2.08    0.29
   2  15   2    2.88    0.35
   2  15   2    1.46    0.28
   2  15   2    1.84    0.35
   3  15   2    0.04    0.27
   3  15   2    0.01    0.20
   3  15   2   -0.01    0.20
   4  15   2    0.09    0.27
   4  15   2    0.25    0.21
   4  15   2   -0.12    0.21
   5  15   2   -0.13    0.28
   5  15   2    0.27    0.23
   6  15   2    0.13    0.29
   7  15   2    0.56    0.32
  10 -16  -2    0.15    0.29
   9 -16  -2   -0.12    0.26
   8 -16  -2    1.37    0.31
  -8  16   2    1.22    0.28
  -8  16   2    0.78    0.34
   7 -16  -2    0.00    0.23
  -7  16   2    0.23    0.30
  -7  16   2    0.12    0.23
   6 -16  -2    0.28    0.23
  -6  16   2    0.00    0.22
  -6  16   2   -0.11    0.30
   5 -16  -2    2.11    0.32
  -5  16   2    2.13    0.42
  -5  16   2    1.76    0.33
   4 -16  -2    0.07    0.20
  -4  16   2    0.01    0.32
  -4  16   2    0.29    0.23
   3 -16  -2    0.10    0.21
  -3  16   2    0.22    0.22
  -3  16   2    0.24    0.31
   2 -16  -2    0.32    0.20
  -2  16   2    0.64    0.22
  -2  16   2    0.88    0.32
   1 -16  -2    1.46    0.27
  -1  16   2    1.28    0.34
  -1  16   2    1.53    0.28
   0  16   2    0.60    0.29
   0  16   2    0.27    0.21
   1  16   2    0.75    0.25
   1  16   2    0.90    0.24
   1  16   2    0.64    0.30
   2  16   2    1.20    0.26
   2  16   2    1.56    0.34
   2  16   2    0.94    0.25
   3  16   2    0.83    0.33
   4  16   2    0.12    0.30
   5  16   2    0.50    0.31
   8 -17  -2    0.27    0.27
  -8  17   2    0.06    0.32
  -8  17   2    0.40    0.26
   7 -17  -2   -0.27    0.23
  -7  17   2   -0.44    0.30
  -7  17   2   -0.06    0.23
   6 -17  -2    0.00    0.23
  -6  17   2    0.16    0.32
  -6  17   2   -0.05    0.23
   5 -17  -2    0.46    0.23
  -5  17   2    0.51    0.32
   4 -17  -2    0.00    0.21
  -4  17   2    0.21    0.35
   3 -17  -2    1.01    0.27
  -3  17   2    1.21    0.38
   2 -17  -2    0.40    0.22
  -2  17   2    0.27    0.32
   1 -17  -2    0.13    0.22
  -1  17   2    0.41    0.30
   0  17   2    0.86    0.32
   1  17   2    0.07    0.30
   2  17   2    0.05    0.30
   3  17   2    0.43    0.32
  -7  18   2    0.08    0.34
  -6  18   2    0.41    0.34
  -5  18   2   -0.19    0.32
  -4  18   2    0.31    0.34
  -3  18   2    0.68    0.38
  -2  18   2    0.45    0.35
  -1  18   2    0.67    0.34
   0  18   2   -0.25    0.31
   1  19  -3    0.22    0.32
  -1 -19   3    0.16    0.37
   0  19  -3    0.15    0.29
  -1  19  -3   -0.04    0.31
  -2  19  -3   -0.07    0.33
  -3  19  -3    0.01    0.35
  -4  19  -3   -0.25    0.36
  -5  19  -3    0.17    0.37
  -6  19  -3   -0.04    0.33
  -7  19  -3    0.26    0.35
  -8  19  -3    0.74    0.37
   4  18  -3    0.49    0.31
  -4 -18   3    0.05    0.36
   3  18  -3   -0.08    0.29
  -3 -18   3   -0.24    0.35
   2  18  -3   -0.05    0.20
   2  18  -3    0.42    0.31
  -2 -18   3   -0.17    0.34
   1  18  -3    0.03    0.20
   1  18  -3    0.08    0.30
  -1 -18   3   -0.20    0.32
   0  18  -3   -0.07    0.28
   0  18  -3    0.10    0.20
   0 -18   3   -0.03    0.32
  -1  18  -3    0.56    0.32
   1 -18   3    0.76    0.37
  -2  18  -3    0.05    0.22
  -2  18  -3   -0.30    0.30
   2 -18   3   -0.28    0.32
  -3  18  -3    0.81    0.36
  -3  18  -3    1.01    0.27
   3 -18   3    0.95    0.39
  -4  18  -3    0.26    0.24
  -4  18  -3    0.08    0.33
   4 -18   3    0.22    0.37
  -5  18  -3    0.27    0.33
  -5  18  -3   -0.07    0.22
  -6  18  -3    0.16    0.33
  -6  18  -3    0.50    0.24
  -7  18  -3   -0.24    0.33
  -7  18  -3   -0.07    0.23
  -8  18  -3   -0.07    0.34
  -8  18  -3   -0.21    0.24
  -9  18  -3   -0.08    0.34
   6  17  -3    0.11    0.31
  -6 -17   3   -0.21    0.35
   5  17  -3    0.46    0.31
  -5 -17   3    0.29    0.35
   4  17  -3    0.24    0.28
   4  17  -3    0.12    0.21
  -4 -17   3   -0.11    0.32
   3  17  -3   -0.17    0.29
   3  17  -3    0.06    0.24
   3  17  -3    0.31    0.21
  -3 -17   3   -0.11    0.32
   2  17  -3   -0.05    0.19
   2  17  -3   -0.14    0.21
   2  17  -3   -0.25    0.27
  -2 -17   3   -0.20    0.33
   1  17  -3   -0.05    0.19
   1  17  -3   -0.33    0.20
   1  17  -3   -0.42    0.26
  -1 -17   3   -0.18    0.31
   0  17  -3    1.07    0.31
   0  17  -3    0.95    0.23
   0  17  -3    0.69    0.23
   0 -17   3    0.40    0.34
  -1  17  -3    0.57    0.21
  -1  17  -3    0.51    0.31
  -1  17  -3    0.22    0.22
   1 -17   3    0.18    0.33
  -2  17  -3    0.33    0.31
  -2  17  -3    0.19    0.21
   2 -17   3   -0.06    0.31
  -3  17  -3    1.60    0.29
  -3  17  -3    1.67    0.37
   3 -17   3    1.87    0.44
  -4  17  -3    0.25    0.21
  -4  17  -3    0.31    0.31
   4 -17   3   -0.10    0.33
  -5  17  -3    0.14    0.31
  -5  17  -3   -0.04    0.20
   5 -17   3    0.14    0.34
  -6  17  -3    0.46    0.32
  -6  17  -3    0.55    0.23
   6 -17   3    0.57    0.40
  -7  17  -3    0.01    0.21
  -7  17  -3   -0.14    0.30
   7 -17   3    0.01    0.38
  -8  17  -3    1.16    0.34
  -8  17  -3    0.66    0.23
   8 -17   3    0.32    0.40
  -9  17  -3    0.91    0.34
  -9  17  -3    0.50    0.24
  -7 -16   3   -0.15    0.35
   6  16  -3   -0.13    0.21
   6  16  -3   -0.08    0.29
  -6 -16   3    0.09    0.33
   5  16  -3    0.01    0.19
   5  16  -3    0.04    0.28
   5  16  -3    0.13    0.22
  -5 -16   3   -0.08    0.32
   4  16  -3    0.47    0.22
   4  16  -3    0.35    0.21
   4  16  -3    0.60    0.29
  -4 -16   3    0.06    0.32
   3  16  -3    1.31    0.32
   3  16  -3    1.59    0.29
   3  16  -3    1.80    0.29
  -3 -16   3    1.99    0.44
   2  16  -3    0.39    0.20
   2  16  -3    0.71    0.27
   2  16  -3    0.55    0.21
  -2 -16   3    0.20    0.31
   1  16  -3    0.87    0.29
   1  16  -3    1.12    0.25
   1  16  -3    1.30    0.24
  -1 -16   3    0.99    0.37
   0  16  -3    0.92    0.29
   0  16  -3    0.47    0.19
   0  16  -3    0.31    0.19
   0 -16   3    0.37    0.32
  -1  16  -3    0.01    0.17
  -1  16  -3   -0.11    0.17
  -1  16  -3    0.16    0.27
   1 -16   3   -0.07    0.29
  -2  16  -3   -0.18    0.26
  -2  16  -3    0.28    0.19
   2 -16   3   -0.10    0.30
  -3  16  -3    0.40    0.20
  -3  16  -3    0.40    0.29
   3 -16   3   -0.15    0.16
   3 -16   3    0.08    0.30
  -4  16  -3    0.14    0.29
  -4  16  -3    0.32    0.20
   4 -16   3    0.05    0.32
  -5  16  -3    1.29    0.35
  -5  16  -3    1.78    0.29
   5 -16   3    2.27    0.48
  -6  16  -3    0.06    0.29
  -6  16  -3   -0.09    0.19
   6 -16   3    0.17    0.35
  -7  16  -3    0.18    0.30
  -7  16  -3    0.04    0.20
   7 -16   3    0.45    0.38
  -8  16  -3    0.85    0.33
  -8  16  -3    0.99    0.24
   8 -16   3    0.95    0.40
  -9  16  -3   -0.05    0.20
  -9  16  -3    0.00    0.30
   9 -16   3    0.37    0.41
  10 -16   3    1.56    0.50
  11 -16   3    0.23    0.47
  -9 -15   3    0.15    0.37
  -8 -15   3   -0.21    0.35
   7  15  -3    0.76    0.31
  -7 -15   3    0.57    0.37
   6  15  -3    0.43    0.27
   6  15  -3    0.11    0.22
   6  15  -3    0.10    0.21
  -6 -15   3    0.19    0.34
   5  15  -3    0.18    0.27
   5  15  -3    0.55    0.23
   5  15  -3    0.25    0.21
  -5 -15   3    0.22    0.32
   4  15  -3   -0.18    0.23
   4  15  -3   -0.01    0.20
   4  15  -3   -0.23    0.17
  -4 -15   3   -0.29    0.29
   3  15  -3    0.08    0.24
   3  15  -3    0.23    0.19
   3  15  -3   -0.17    0.17
  -3 -15   3   -0.22    0.29
   2  15  -3    0.08    0.25
   2  15  -3    0.15    0.17
   2  15  -3    0.19    0.19
  -2 -15   3   -0.07    0.29
   1  15  -3    3.35    0.40
   1  15  -3    3.24    0.43
   1  15  -3    2.85    0.37
  -1 -15   3    3.98    0.64
   0  15  -3    0.59    0.19
   0  15  -3    0.19    0.25
   0  15  -3    0.25    0.18
   0 -15   3    0.06    0.29
  -1  15  -3    0.45    0.20
  -1  15  -3    0.36    0.27
  -1  15  -3    0.62    0.18
   1 -15   3    0.34    0.30
  -2  15  -3    2.27    0.39
  -2  15  -3    2.37    0.33
   2 -15   3    3.36    0.51
  -3  15  -3    1.13    0.24
  -3  15  -3    0.92    0.31
   3 -15   3    1.36    0.22
   3 -15   3    1.39    0.38
  -4  15  -3    0.32    0.19
  -4  15  -3    0.42    0.26
   4 -15   3    0.26    0.31
   4 -15   3    0.29    0.17
  -5  15  -3    0.79    0.28
  -5  15  -3    0.48    0.19
   5 -15   3    0.33    0.35
  -6  15  -3   10.72    1.00
  -6  15  -3    9.93    0.86
   6 -15   3   10.60    1.33
  -7  15  -3    1.24    0.33
  -7  15  -3    1.24    0.25
   7 -15   3    2.28    0.50
  -8  15  -3    0.32    0.28
  -8  15  -3    0.68    0.23
   8 -15   3    0.99    0.39
  -9  15  -3   -0.01    0.20
  -9  15  -3    0.02    0.27
   9 -15   3    0.25    0.39
  10 -15   3    0.69    0.42
  11 -15   3    0.91    0.48
  12 -15   3    0.13    0.47
  13 -15   3   -0.13    0.50
 -10 -14   3   -0.14    0.36
  -9 -14   3    0.08    0.34
   8  14  -3    0.19    0.23
  -8 -14   3    0.00    0.32
   7  14  -3    0.46    0.27
   7  14  -3    0.45    0.23
  -7 -14   3    0.73    0.35
   6  14  -3    0.30    0.27
   6  14  -3    0.34    0.21
   6  14  -3    0.22    0.20
  -6 -14   3    0.33    0.32
   5  14  -3    1.31    0.30
   5  14  -3    1.16    0.26
   5  14  -3    1.50    0.25
  -5 -14   3    1.47    0.41
   4  14  -3    3.21    0.42
   4  14  -3    3.87    0.50
   3  14  -3    0.88    0.25
   3  14  -3    0.28    0.18
   3  14  -3    0.62    0.19
  -3 -14   3    0.20    0.30
   2  14  -3    3.61    0.54
   2  14  -3    3.93    0.43
   2  14  -3    4.96    0.48
  -2 -14   3    4.80    0.69
   1  14  -3    0.29    0.17
   1  14  -3    0.61    0.24
   1  14  -3    0.00    0.16
  -1 -14   3    0.18    0.28
   0  14  -3    8.28    0.77
  -1  14  -3    0.98    0.26
  -1  14  -3    0.78    0.19
  -1  14  -3    1.04    0.21
   1 -14   3    0.89    0.32
  -2  14  -3    0.37    0.18
  -2  14  -3    0.63    0.19
  -2  14  -3    0.91    0.26
   2 -14   3    0.55    0.30
  -3  14  -3    2.43    0.33
  -3  14  -3    2.20    0.27
   3 -14   3    1.35    0.23
   3 -14   3    1.43    0.38
  -4  14  -3    0.35    0.18
  -4  14  -3    0.70    0.26
   4 -14   3    0.35    0.31
   4 -14   3    0.43    0.16
   5 -14   3    2.45    0.34
   5 -14   3    3.06    0.51
  -6  14  -3    5.51    0.63
  -6  14  -3    4.97    0.51
   6 -14   3    6.26    0.85
  -7  14  -3    1.02    0.23
  -7  14  -3    0.68    0.28
   7 -14   3    0.90    0.38
  -8  14  -3    1.30    0.30
  -8  14  -3    1.27    0.24
   8 -14   3    0.93    0.41
  -9  14  -3    4.16    0.43
  -9  14  -3    4.20    0.51
   9 -14   3    4.24    0.72
  10 -14   3   -0.16    0.38
  11 -14   3   -0.11    0.41
  12 -14   3   -0.12    0.46
  13 -14   3    0.14    0.49
  14 -14   3    0.57    0.51
 -11 -13   3    0.20    0.39
 -10 -13   3   -0.09    0.35
   9  13  -3    0.41    0.25
  -9 -13   3    0.46    0.36
   8  13  -3    0.42    0.24
  -8 -13   3    0.67    0.35
   7  13  -3    1.26    0.24
   7  13  -3    1.21    0.28
   7  13  -3    0.95    0.24
  -7 -13   3    0.64    0.33
   6  13  -3    1.18    0.25
   6  13  -3    1.11    0.25
   6  13  -3    1.02    0.27
  -6 -13   3    1.17    0.36
   5  13  -3    3.51    0.48
   5  13  -3    2.72    0.35
   5  13  -3    2.90    0.38
  -5 -13   3    3.44    0.54
   4  13  -3    0.69    0.18
   4  13  -3    0.82    0.24
   4  13  -3    0.44    0.19
  -4 -13   3    0.38    0.31
   3  13  -3    2.29    0.33
   3  13  -3    2.08    0.27
   3  13  -3    2.15    0.30
  -3 -13   3    2.32    0.44
   2  13  -3    2.80    0.34
   2  13  -3    3.96    0.44
   2  13  -3    2.99    0.32
  -2 -13   3    1.93    0.46
   1  13  -3    6.87    0.64
   1  13  -3    7.83    0.72
   1  13  -3    8.33    0.76
  -1 -13   3    8.01    1.02
   0  13  -3    3.74    0.37
   0 -13   3    2.63    0.51
  -1  13  -3    4.86    0.48
  -1  13  -3    5.80    0.58
  -2  13  -3    2.76    0.35
   2 -13   3    3.52    0.51
   3 -13   3    5.88    0.56
   3 -13   3    5.84    0.79
  -4  13  -3    3.25    0.37
  -5  13  -3    6.09    0.47
   5 -13   3    3.72    0.47
   5 -13   3    4.87    0.73
  -6  13  -3    2.66    0.34
  -6  13  -3    3.37    0.47
   6 -13   3    3.20    0.38
   6 -13   3    3.45    0.54
  -7  13  -3    1.16    0.21
  -7  13  -3    1.07    0.26
   7 -13   3    1.17    0.40
  -8  13  -3   11.06    0.93
  -8  13  -3   12.09    1.08
  -9  13  -3    0.76    0.20
  -9  13  -3    0.65    0.26
   9 -13   3    0.61    0.38
  10 -13   3    0.71    0.42
  11 -13   3    0.51    0.44
  12 -13   3    0.32    0.45
  13 -13   3    0.08    0.46
  14 -13   3    0.38    0.49
  15 -13   3    0.00    0.51
 -12 -12   3   -0.01    0.39
 -11 -12   3    0.82    0.41
  10  12  -3    0.60    0.26
 -10 -12   3    0.73    0.38
   9  12  -3    1.64    0.31
  -9 -12   3    1.10    0.41
   8  12  -3    0.20    0.21
  -8 -12   3    0.25    0.32
   7  12  -3    2.84    0.34
   7  12  -3    3.11    0.40
   7  12  -3    2.63    0.39
  -7 -12   3    3.19    0.52
   6  12  -3    8.07    0.70
   5  12  -3    1.69    0.24
   5  12  -3    1.77    0.29
   5  12  -3    1.54    0.27
  -5 -12   3    1.32    0.38
   4  12  -3    2.46    0.32
   4  12  -3    3.00    0.36
   4  12  -3    2.77    0.36
  -4 -12   3    3.09    0.51
   3  12  -3    0.47    0.17
   3  12  -3    0.80    0.17
   3  12  -3    0.92    0.22
  -3 -12   3    0.01    0.29
   2  12  -3   12.23    1.02
   2  12  -3   13.02    1.16
   2  12  -3   13.20    1.13
   1  12  -3    4.29    0.49
   1  12  -3    3.73    0.38
   1  12  -3    3.88    0.42
  -1 -12   3    4.19    0.65
   0  12  -3    0.80    0.17
   0  12  -3    0.73    0.17
   0  12  -3    1.37    0.24
   0 -12   3    0.94    0.30
  -1  12  -3    5.26    0.50
  -1  12  -3    4.87    0.55
  -1  12  -3    4.75    0.46
   1 -12   3    5.29    0.73
  -2  12  -3   20.58    1.61
  -2  12  -3   19.60    1.41
  -2  12  -3   15.50    1.55
   2 -12   3   17.45    2.08
  -3  12  -3    0.58    0.21
  -3  12  -3    0.59    0.17
   3 -12   3    0.58    0.25
  -4  12  -3    2.79    0.38
   4 -12   3    4.48    0.40
  -5  12  -3    5.00    0.60
  -5  12  -3    5.51    0.51
   5 -12   3    6.50    0.80
   5 -12   3    5.90    0.54
  -6  12  -3    5.05    0.52
  -6  12  -3    4.98    0.43
   6 -12   3    3.88    0.70
   6 -12   3    3.70    0.44
  -7  12  -3    0.60    0.20
  -8  12  -3    1.33    0.20
  -8  12  -3    1.55    0.26
   8 -12   3    1.09    0.38
  -9  12  -3    0.34    0.21
  -9  12  -3    0.27    0.17
   9 -12   3    0.61    0.35
  10 -12   3    0.75    0.40
  11 -12   3    1.13    0.45
  12 -12   3    0.45    0.44
  13 -12   3    0.15    0.46
  14 -12   3    0.25    0.48
  15 -12   3   -0.37    0.49
 -12 -11   3    0.12    0.37
  11  11  -3    0.22    0.25
 -11 -11   3   -0.02    0.35
  10  11  -3    0.73    0.27
 -10 -11   3    0.72    0.37
   9  11  -3    0.09    0.21
  -9 -11   3    0.19    0.33
   8  11  -3    1.23    0.27
  -8 -11   3    1.00    0.37
   7  11  -3    1.18    0.21
   7  11  -3    1.10    0.24
   7  11  -3    1.31    0.27
  -7 -11   3    0.73    0.34
   6  11  -3    7.26    0.64
   6  11  -3    8.55    0.76
  -6 -11   3    6.75    0.97
   5  11  -3    4.87    0.50
   5  11  -3    4.33    0.40
   5  11  -3    3.84    0.44
  -5 -11   3    3.37    0.66
   4  11  -3   12.95    1.09
   4  11  -3   12.36    1.11
   4  11  -3   11.53    0.97
  -4 -11   3   12.25    1.46
   3  11  -3    0.11    0.15
   3  11  -3    0.34    0.19
   3  11  -3    0.17    0.13
  -3 -11   3    0.40    0.26
   2  11  -3   33.30    2.69
   2  11  -3   35.59    3.03
   2  11  -3   37.42    3.00
   1  11  -3    0.50    0.18
   1  11  -3    0.28    0.13
   1  11  -3   -0.01    0.13
  -1 -11   3    0.34    0.23
   0  11  -3   12.74    1.18
   0  11  -3   13.53    1.04
  -1  11  -3   17.76    1.63
  -1  11  -3   19.14    1.60
  -1  11  -3   17.86    1.44
   1 -11   3   20.04    2.14
  -2  11  -3    8.43    0.86
  -2  11  -3    9.14    0.75
   2 -11   3   10.22    1.11
  -3  11  -3    3.10    0.39
  -3  11  -3    2.59    0.30
   3 -11   3    2.41    0.40
  -4  11  -3    2.91    0.33
  -4  11  -3    2.84    0.41
   4 -11   3    3.28    0.33
   4 -11   3    3.26    0.57
  -5  11  -3    5.89    0.56
  -5  11  -3    6.08    0.47
   5 -11   3    5.04    0.73
   5 -11   3    4.27    0.49
  -6  11  -3   11.83    0.85
  -6  11  -3   11.36    0.97
   6 -11   3    9.16    1.28
   6 -11   3    9.64    0.93
  -7  11  -3    0.23    0.18
  -7  11  -3    0.45    0.16
   7 -11   3    0.39    0.16
   7 -11   3    0.32    0.29
  -8  11  -3    4.06    0.51
  -8  11  -3    4.33    0.42
   8 -11   3    5.04    0.70
  -9  11  -3    2.73    0.36
  -9  11  -3    2.56    0.33
   9 -11   3    3.83    0.62
  10 -11   3    2.56    0.51
  11 -11   3    0.66    0.40
  12 -11   3    2.29    0.51
  13 -11   3   -0.13    0.43
  14 -11   3    0.66    0.47
  15 -11   3   -0.24    0.50
  16 -11   3   -0.24    0.53
  11  10  -3   -0.15    0.23
  10  10  -3    0.96    0.27
   9  10  -3   -0.21    0.19
   8  10  -3    3.64    0.45
   7  10  -3    1.88    0.27
   7  10  -3    1.33    0.25
   7  10  -3    1.57    0.21
  -7 -10   3    0.84    0.34
   6  10  -3    3.34    0.39
   6  10  -3    2.54    0.29
  -6 -10   3    1.70    0.41
   5  10  -3   16.38    1.32
   5  10  -3   16.54    1.17
   5  10  -3   13.33    1.30
  -5 -10   3   13.41    1.74
   4  10  -3    7.47    0.64
   4  10  -3    7.96    0.72
   4  10  -3    7.77    0.74
   3  10  -3    7.77    0.77
   3  10  -3    7.76    0.67
   3  10  -3    8.40    0.75
  -3 -10   3    9.31    1.04
   2  10  -3   18.58    1.54
   2  10  -3   16.69    1.38
   2  10  -3   17.13    1.56
  -2 -10   3   19.24    2.05
   1  10  -3    5.10    0.45
   1  10  -3    4.70    0.54
  -1 -10   3    5.81    0.70
   0  10  -3   12.94    1.31
   0  10  -3   16.41    1.19
   0  10  -3   16.82    1.35
  -1  10  -3    5.62    0.61
  -1  10  -3    6.58    0.57
  -1  10  -3    5.63    0.52
   1 -10   3    7.47    0.81
  -2  10  -3    0.01    0.15
  -2  10  -3   -0.14    0.11
  -2  10  -3    0.05    0.09
  -3  10  -3    0.69    0.19
  -3  10  -3    0.88    0.16
   3 -10   3    0.70    0.23
  -4  10  -3    3.36    0.34
  -5  10  -3    1.22    0.20
   5 -10   3    0.66    0.14
   5 -10   3    0.78    0.24
  -6  10  -3    7.21    0.57
  -6  10  -3    6.05    0.65
   6 -10   3    6.59    0.61
   6 -10   3    6.58    0.88
  -7  10  -3    0.75    0.21
  -7  10  -3    1.04    0.19
   7 -10   3    1.20    0.19
   7 -10   3    1.39    0.32
  -8  10  -3   14.91    1.20
  -8  10  -3   15.60    1.36
   8 -10   3   16.78    1.35
   8 -10   3   14.39    1.80
  -9  10  -3   -0.04    0.17
  -9  10  -3    0.18    0.14
   9 -10   3    0.01    0.31
  10 -10   3    0.21    0.35
  11 -10   3    0.88    0.41
  12 -10   3    0.74    0.43
  13 -10   3    0.05    0.42
  14 -10   3    0.26    0.47
  15 -10   3    0.05    0.50
  16 -10   3   -0.34    0.56
  13   9  -3    0.29    0.57
  12   9  -3    0.18    0.53
  12   9  -3    0.33    0.26
  11   9  -3    0.13    0.51
  11   9  -3    0.51    0.25
  10   9  -3    0.76    0.25
   9   9  -3    6.54    0.66
   8   9  -3    0.82    0.24
   7   9  -3    4.20    0.49
   7   9  -3    3.84    0.40
   7   9  -3    4.05    0.46
  -7  -9   3    4.66    0.62
   6   9  -3    4.09    0.37
   6   9  -3    3.55    0.44
   6   9  -3    3.84    0.42
  -6  -9   3    3.22    0.60
   5   9  -3    0.65    0.19
   5   9  -3    0.90    0.19
   5   9  -3    0.97    0.17
  -5  -9   3    0.65    0.27
   4   9  -3    6.40    0.53
   4   9  -3    5.79    0.61
   4   9  -3    6.60    0.59
   3   9  -3    6.10    0.56
   3   9  -3    5.67    0.51
   3   9  -3    5.70    0.59
  -3  -9   3    6.88    0.79
   2   9  -3    0.95    0.15
   2   9  -3    1.04    0.16
   2   9  -3    0.54    0.17
  -2  -9   3    0.71    0.25
   1   9  -3    1.65    0.20
   1   9  -3    1.13    0.21
   1   9  -3    1.42    0.19
  -1  -9   3    1.65    0.29
   0   9  -3   13.66    0.98
   0   9  -3   13.77    1.11
   0   9  -3   10.41    1.08
  -1   9  -3    0.40    0.12
  -1   9  -3    0.21    0.14
  -1   9  -3    0.05    0.09
   1  -9   3    0.49    0.19
  -2   9  -3    0.10    0.14
  -2   9  -3    0.09    0.08
  -2   9  -3    0.11    0.11
   2  -9   3    0.10    0.17
  -3   9  -3    5.88    0.54
  -3   9  -3    6.04    0.63
   3  -9   3    7.41    0.80
  -4   9  -3    8.89    0.71
  -5   9  -3    7.01    0.63
  -5   9  -3    6.97    0.54
   5  -9   3    5.75    0.57
   5  -9   3    5.97    0.82
  -6   9  -3    5.02    0.41
  -6   9  -3    4.19    0.48
   6  -9   3    4.82    0.44
   6  -9   3    3.61    0.65
  -7   9  -3    0.38    0.13
  -7   9  -3    0.09    0.15
   7  -9   3    0.02    0.12
   7  -9   3    0.25    0.24
  -8   9  -3    5.52    0.46
  -8   9  -3    5.72    0.55
   8  -9   3    4.23    0.75
   8  -9   3    5.17    0.52
  -9   9  -3    0.06    0.13
  -9   9  -3   -0.07    0.15
   9  -9   3    0.44    0.31
  10  -9   3    2.67    0.52
  11  -9   3    1.23    0.42
  12  -9   3    0.34    0.38
  13  -9   3    0.50    0.42
  14  -9   3   -0.05    0.45
  15  -9   3   -0.16    0.50
  16  -9   3   -0.10    0.58
  14   8  -3    0.37    0.65
  13   8  -3   -0.01    0.24
  13   8  -3    0.35    0.61
  12   8  -3    1.01    0.63
  12   8  -3    2.46    0.36
  11   8  -3   -0.25    0.53
  11   8  -3    0.46    0.23
  10   8  -3    0.23    0.21
  10   8  -3    1.46    0.53
   9   8  -3    2.64    0.61
   9   8  -3    3.11    0.39
   8   8  -3    2.47    0.49
   8   8  -3    1.91    0.30
   7   8  -3    3.24    0.36
   7   8  -3    3.34    0.32
   7   8  -3    2.61    0.37
   6   8  -3    9.23    0.81
   6   8  -3    8.61    0.71
   6   8  -3    8.62    0.82
   5   8  -3    2.16    0.22
   5   8  -3    1.17    0.21
   5   8  -3    1.99    0.26
  -5  -8   3    1.29    0.30
   4   8  -3   10.33    0.85
   4   8  -3   11.81    0.96
   4   8  -3   10.44    0.96
  -4  -8   3   10.90    1.28
   3   8  -3    1.80    0.24
   3   8  -3    2.13    0.26
   3   8  -3    2.25    0.27
  -3  -8   3    2.61    0.42
   2   8  -3    2.03    0.26
   2   8  -3    3.03    0.29
   2   8  -3    2.76    0.29
  -2  -8   3    2.54    0.39
   1   8  -3   20.82    1.69
   1   8  -3   20.39    1.90
   1   8  -3   23.53    1.88
  -1  -8   3   23.93    2.49
   0   8  -3    4.31    0.41
  -1   8  -3   17.52    1.53
  -1   8  -3   19.73    1.38
  -1   8  -3   18.42    1.56
   1  -8   3   16.27    2.03
  -2   8  -3    0.39    0.09
  -2   8  -3    0.34    0.14
  -2   8  -3    0.58    0.13
   2  -8   3    0.75    0.19
  -3   8  -3    3.70    0.39
  -3   8  -3    3.55    0.45
   3  -8   3    4.57    0.59
   3  -8   3    5.10    0.40
  -4   8  -3   18.29    1.56
  -4   8  -3   18.39    1.76
   4  -8   3   21.27    2.30
   4  -8   3   23.31    1.72
  -5   8  -3    2.28    0.36
  -5   8  -3    2.13    0.30
   5  -8   3    3.79    0.44
   5  -8   3    3.39    0.31
  -6   8  -3   21.10    1.93
  -6   8  -3   25.01    1.71
   6  -8   3   19.75    2.53
   6  -8   3   23.70    1.90
  -7   8  -3    7.40    0.75
  -7   8  -3    7.15    0.66
   7  -8   3    9.15    1.02
   7  -8   3    8.99    0.73
  -8   8  -3    3.91    0.34
  -8   8  -3    3.82    0.41
   8  -8   3    3.20    0.53
   8  -8   3    3.34    0.39
  -9   8  -3    0.91    0.16
   9  -8   3    0.88    0.34
   9  -8   3    0.79    0.18
  10  -8   3   14.45    1.72
  11  -8   3   -0.16    0.34
  12  -8   3    1.17    0.42
  13  -8   3    0.35    0.43
  14  -8   3    1.09    0.46
  15  -8   3    0.25    0.52
  16  -8   3    0.23    0.60
  17  -8   3   -0.15    0.64
  15   7  -3    0.01    0.69
  14   7  -3   -0.08    0.65
  13   7  -3    1.18    0.29
  13   7  -3    0.65    0.61
  12   7  -3    1.03    0.59
  11   7  -3    0.51    0.23
  11   7  -3    0.85    0.54
  10   7  -3    1.28    0.50
  10   7  -3    0.51    0.22
   9   7  -3    1.83    0.28
   9   7  -3    1.60    0.50
   8   7  -3    3.84    0.69
   7   7  -3   12.15    1.55
   7   7  -3   12.73    1.02
   7   7  -3   13.56    1.15
   7   7  -3   13.63    1.16
   6   7  -3    2.06    0.26
   6   7  -3    3.37    0.48
   5   7  -3   16.40    1.40
   5   7  -3   15.72    1.40
   5   7  -3   16.38    1.24
   4   7  -3   19.88    1.72
   4   7  -3   21.00    1.54
   4   7  -3   21.46    1.74
  -4  -7   3   18.20    2.28
   3   7  -3    0.03    0.10
   3   7  -3    0.22    0.10
   3   7  -3    0.12    0.11
  -3  -7   3    0.05    0.18
   2   7  -3    1.23    0.15
   2   7  -3    1.16    0.17
   2   7  -3    0.64    0.13
  -2  -7   3    0.68    0.23
   1   7  -3    1.38    0.20
   1   7  -3    1.58    0.20
   0   7  -3   49.52    3.70
   0   7  -3   48.70    4.17
  -1   7  -3   14.69    1.18
  -1   7  -3   13.74    1.07
  -1   7  -3   13.32    1.21
   1  -7   3   13.77    1.58
  -2   7  -3    3.44    0.31
  -2   7  -3    3.25    0.31
  -2   7  -3    3.17    0.37
   3  -7   3    9.70    1.15
   3  -7   3    9.91    0.84
  -4   7  -3   22.31    1.85
   4  -7   3   26.22    2.05
  -5   7  -3    3.80    0.39
  -5   7  -3    3.77    0.33
   5  -7   3    3.08    0.52
   5  -7   3    3.03    0.33
  -6   7  -3   11.23    1.02
  -6   7  -3   11.13    0.90
   6  -7   3   12.83    1.00
   6  -7   3   10.85    1.36
  -7   7  -3    1.49    0.18
  -7   7  -3    1.02    0.18
   7  -7   3    1.08    0.30
   7  -7   3    1.11    0.16
  -8   7  -3    9.57    0.74
  -8   7  -3    8.85    0.84
   8  -7   3    9.40    0.83
  -9   7  -3   -0.03    0.12
   9  -7   3    0.15    0.29
   9  -7   3    0.02    0.12
  10  -7   3    0.10    0.14
  10  -7   3    0.12    0.32
  11  -7   3   -0.11    0.35
  12  -7   3    0.95    0.43
  13  -7   3    0.39    0.43
  14  -7   3    1.80    0.55
  15  -7   3    0.66    0.56
  16  -7   3    0.48    0.60
  17  -7   3    0.50    0.69
  15   6  -3   -0.27    0.66
  14   6  -3    0.18    0.24
  14   6  -3   -0.20    0.61
  13   6  -3    0.90    0.27
  13   6  -3    0.38    0.58
  12   6  -3    1.38    0.57
  11   6  -3    4.70    0.83
  11   6  -3    4.56    0.52
  10   6  -3    1.70    0.28
  10   6  -3    1.00    0.49
   9   6  -3    6.40    0.63
   9   6  -3    6.26    0.90
   7   6  -3    1.38    0.19
   7   6  -3    1.46    0.17
   7   6  -3    1.46    0.23
   7   6  -3    1.61    0.40
   6   6  -3    8.21    0.99
   6   6  -3    8.19    0.63
   6   6  -3    8.28    0.72
   6   6  -3    6.98    0.72
   5   6  -3    0.38    0.14
   5   6  -3    0.80    0.27
   5   6  -3    0.44    0.12
   5   6  -3    0.48    0.13
   4   6  -3   37.35    3.15
   4   6  -3   36.73    2.79
   3   6  -3    5.68    0.49
   3   6  -3    5.68    0.55
   3   6  -3    6.13    0.54
  -3  -6   3    6.57    0.75
   2   6  -3    1.64    0.16
   2   6  -3    1.09    0.16
   2   6  -3    1.46    0.18
  -2  -6   3    1.15    0.24
   1   6  -3    6.46    0.62
   1   6  -3    7.18    0.64
   1   6  -3    7.59    0.56
   0   6  -3   51.83    3.92
   0   6  -3   52.32    4.41
  -1   6  -3   28.24    2.57
  -1   6  -3   27.14    2.28
  -1   6  -3   32.56    2.54
   1  -6   3   32.92    3.36
  -2   6  -3    4.42    0.49
  -2   6  -3    5.69    0.43
  -2   6  -3    5.39    0.45
   2  -6   3    5.19    0.64
   3  -6   3   30.17    2.46
   3  -6   3   28.30    3.26
  -5   6  -3   10.13    0.83
  -5   6  -3   10.29    0.94
   5  -6   3   11.11    0.91
   5  -6   3   10.90    1.24
  -6   6  -3    6.61    0.67
  -6   6  -3    7.15    0.58
   6  -6   3    7.86    0.64
  -8   6  -3   37.86    2.89
  -8   6  -3   38.66    3.26
   8  -6   3   38.58    3.24
   9  -6   3    0.17    0.28
   9  -6   3    0.16    0.13
  10  -6   3    4.91    0.72
  10  -6   3    4.54    0.49
  11  -6   3    0.24    0.18
  11  -6   3    1.23    0.38
  12  -6   3    0.52    0.40
  13  -6   3    2.85    0.60
  14  -6   3    2.40    0.61
  15  -6   3    0.06    0.55
  16  -6   3    0.30    0.62
  17  -6   3   -0.07    0.70
  16   5  -3    0.33    0.69
  15   5  -3    0.04    0.61
  14   5  -3    1.11    0.28
  14   5  -3    0.31    0.59
  13   5  -3    0.08    0.23
  13   5  -3    0.18    0.54
  12   5  -3    2.03    0.33
  12   5  -3    1.82    0.57
  11   5  -3    1.01    0.24
  11   5  -3    0.63    0.47
  10   5  -3    0.71    0.20
  10   5  -3    0.93    0.45
   9   5  -3    4.10    0.62
   9   5  -3    3.21    0.41
   8   5  -3    3.79    0.55
   8   5  -3    2.71    0.36
   7   5  -3    1.64    0.41
   7   5  -3    2.22    0.22
   7   5  -3    2.25    0.29
   7   5  -3    1.89    0.26
   6   5  -3   17.21    1.30
   6   5  -3   15.28    1.46
   6   5  -3   19.11    1.97
   5   5  -3    0.82    0.29
   5   5  -3    0.38    0.12
   4   5  -3   59.82    4.82
   4   5  -3   57.65    4.86
   4   5  -3   57.48    6.36
   4   5  -3   54.62    4.31
   3   5  -3   50.05    4.10
   3   5  -3   45.71    3.67
   3   5  -3   46.76    4.14
  -3  -5   3   52.92    5.42
   2   5  -3   38.59    3.07
   2   5  -3   34.90    2.75
   2   5  -3   36.09    3.10
   1   5  -3    6.87    0.53
   1   5  -3    7.00    0.58
   1   5  -3    6.25    0.60
   0   5  -3   11.36    0.81
   0   5  -3   10.49    0.89
   0   5  -3   11.07    0.92
   0  -5   3    9.22    1.19
  -1   5  -3   29.71    2.16
  -1   5  -3   22.51    2.19
  -1   5  -3   25.53    1.95
   1  -5   3   25.09    2.86
  -2   5  -3   29.95    2.34
  -2   5  -3   26.69    2.38
  -2   5  -3   26.40    2.11
   2  -5   3   28.65    3.10
  -3   5  -3   12.78    1.08
  -3   5  -3   12.22    0.96
  -4   5  -3   22.95    1.96
  -4   5  -3   22.93    1.74
   5  -5   3    4.47    0.57
   5  -5   3    3.86    0.37
  -6   5  -3    4.67    0.50
  -6   5  -3    5.80    0.44
   6  -5   3    5.84    0.48
   6  -5   3    4.43    0.71
  -8   5  -3   10.22    0.91
   8  -5   3   10.37    0.90
   9  -5   3    0.85    0.28
   9  -5   3    0.14    0.14
  10  -5   3   15.75    1.92
  10  -5   3   17.08    1.43
  11  -5   3    2.78    0.51
  11  -5   3    2.17    0.30
  12  -5   3    1.49    0.47
  13  -5   3    3.59    0.67
  14  -5   3    1.37    0.55
  15  -5   3   -0.37    0.57
  16  -5   3   -0.40    0.63
  17  -5   3   -0.28    0.70
  16   4  -3    0.22    0.66
  15   4  -3    0.35    0.26
  15   4  -3    0.66    0.61
  14   4  -3    0.93    0.26
  14   4  -3   -0.03    0.56
  13   4  -3    0.15    0.23
  13   4  -3    0.26    0.53
  12   4  -3    0.47    0.49
  12   4  -3    0.91    0.24
  11   4  -3    0.10    0.44
  11   4  -3    0.31    0.19
  10   4  -3    9.36    1.17
  10   4  -3    8.48    0.83
   9   4  -3    7.71    0.75
   9   4  -3    8.36    1.06
   8   4  -3    1.48    0.23
   8   4  -3    1.74    0.40
   7   4  -3    1.93    0.27
   6   4  -3   16.07    1.65
   6   4  -3   12.63    1.21
   5   4  -3   13.22    1.10
   5   4  -3   12.30    0.97
   4   4  -3   28.73    3.29
   4   4  -3   29.82    2.50
   4   4  -3   30.47    2.49
   4   4  -3   28.76    2.22
   3   4  -3    6.31    0.53
   3   4  -3    6.85    0.60
   3   4  -3    7.06    0.60
   2   4  -3   41.98    3.58
   2   4  -3   47.27    3.55
   2   4  -3   42.46    3.18
  -2  -4   3   37.27    4.68
   1   4  -3    0.35    0.09
   1   4  -3    0.51    0.08
   1   4  -3    0.60    0.08
   0   4  -3   10.89    0.95
   0   4  -3   11.76    0.87
  -1   4  -3    6.30    0.60
  -1   4  -3    7.45    0.57
  -1   4  -3    6.61    0.53
   1  -4   3    6.27    0.77
  -2   4  -3   18.89    1.54
  -2   4  -3   20.00    1.74
   2  -4   3   21.76    1.70
   2  -4   3   20.53    2.26
  -3   4  -3    5.84    0.46
  -3   4  -3    5.45    0.52
   3  -4   3    5.57    0.68
   3  -4   3    6.00    0.49
  -4   4  -3    2.76    0.29
  -4   4  -3    2.99    0.26
   4  -4   3    2.64    0.25
  -5   4  -3    2.12    0.28
  -5   4  -3    2.86    0.24
  -6   4  -3    6.31    0.62
  -6   4  -3    6.96    0.55
   6  -4   3    6.95    0.87
   6  -4   3    7.27    0.61
  -7   4  -3   -0.16    0.09
  -7   4  -3   -0.29    0.11
   7  -4   3   -0.25    0.22
   7  -4   3    0.09    0.09
  -8   4  -3    2.59    0.27
   8  -4   3    2.58    0.44
   8  -4   3    2.47    0.28
   9  -4   3    1.99    0.37
   9  -4   3    1.31    0.22
  10  -4   3    4.37    0.46
  10  -4   3    4.63    0.73
  11  -4   3    1.26    0.22
  11  -4   3    0.83    0.40
  12  -4   3    1.61    0.50
  12  -4   3    1.33    0.26
  13  -4   3    0.58    0.49
  14  -4   3    2.94    0.68
  15  -4   3   -0.47    0.58
  16  -4   3   -0.29    0.66
  17  -4   3   -0.42    0.71
  16   3  -3   -0.04    0.64
  15   3  -3    0.06    0.24
  15   3  -3   -0.12    0.57
  14   3  -3    1.82    0.63
  14   3  -3    2.39    0.37
  13   3  -3    3.12    0.42
  13   3  -3    3.03    0.66
  12   3  -3    2.38    0.59
  12   3  -3    3.31    0.41
  11   3  -3    1.24    0.26
  11   3  -3    1.43    0.47
  10   3  -3    1.87    0.31
  10   3  -3    2.89    0.50
   9   3  -3    1.10    0.22
   9   3  -3    1.29    0.36
   8   3  -3   20.50    1.74
   8   3  -3   19.70    2.30
   7   3  -3    3.57    0.52
   7   3  -3    3.61    0.39
   6   3  -3    6.59    0.75
   6   3  -3    4.79    0.51
   5   3  -3    1.90    0.25
   5   3  -3    2.10    0.23
   4   3  -3   38.63    2.97
   4   3  -3   39.78    4.39
   4   3  -3   40.09    3.34
   3   3  -3    1.64    0.17
   3   3  -3    1.19    0.19
   3   3  -3    1.82    0.19
   2   3  -3   54.28    4.77
   2   3  -3   60.11    4.73
   2   3  -3   56.00    4.24
  -2  -3   3   55.36    6.24
   1   3  -3   57.26    4.26
   1   3  -3   56.78    4.75
   1   3  -3   56.25    4.80
   0   3  -3    2.80    0.28
   0   3  -3    2.77    0.25
   0   3  -3    2.89    0.25
  -1   3  -3    2.99    0.25
  -2   3  -3    1.23    0.15
  -2   3  -3    1.62    0.16
   2  -3   3    1.80    0.24
  -3   3  -3   45.00    3.84
  -3   3  -3   45.10    3.41
   3  -3   3   46.02    5.02
  -4   3  -3   14.20    1.24
  -4   3  -3   14.09    1.10
   4  -3   3   15.01    1.63
  -5   3  -3    2.97    0.29
   5  -3   3    3.10    0.45
   5  -3   3    2.56    0.27
  -6   3  -3   12.37    1.12
   6  -3   3   12.75    1.10
   6  -3   3   13.85    1.50
  -7   3  -3   -0.08    0.07
  -7   3  -3    0.06    0.10
   7  -3   3   -0.20    0.21
   7  -3   3   -0.01    0.10
  -8   3  -3    7.96    0.73
   8  -3   3    8.41    0.73
   9  -3   3    3.18    0.51
   9  -3   3    2.90    0.33
  10  -3   3    1.59    0.41
  10  -3   3    1.65    0.23
  11  -3   3   -0.18    0.15
  11  -3   3   -0.61    0.37
  12  -3   3   -0.20    0.16
  12  -3   3   -0.42    0.43
  13  -3   3    1.65    0.55
  13  -3   3    1.23    0.25
  14  -3   3    1.45    0.60
  15  -3   3   -0.68    0.60
  16  -3   3   -0.22    0.66
  17  -3   3   -0.68    0.69
  17   2  -3   -0.04    0.66
  16   2  -3    0.41    0.61
  16   2  -3    0.65    0.28
  15   2  -3    0.44    0.56
  15   2  -3   -0.01    0.24
  14   2  -3    1.72    0.33
  14   2  -3    1.32    0.56
  13   2  -3    0.52    0.48
  13   2  -3    0.30    0.23
  12   2  -3    4.49    0.51
  12   2  -3    4.23    0.76
  11   2  -3    0.14    0.19
  11   2  -3    1.09    0.39
  10   2  -3    2.65    0.40
  10   2  -3    4.18    0.61
   9   2  -3    2.33    0.31
   9   2  -3    1.85    0.40
   8   2  -3   12.14    1.32
   8   2  -3    9.84    0.96
   7   2  -3   27.32    2.29
   7   2  -3   26.50    3.02
   6   2  -3    7.60    0.94
   6   2  -3    7.65    0.69
   5   2  -3   10.93    1.29
   5   2  -3   11.35    0.97
   4   2  -3   10.97    0.94
   4   2  -3   10.69    1.24
   3   2  -3   11.95    0.98
   3   2  -3   12.97    1.10
   3   2  -3   13.88    1.46
   2   2  -3    5.49    0.48
   1   2  -3  223.60   17.41
   1   2  -3  240.97   19.42
   0   2  -3  109.42    8.54
   0   2  -3  118.40    9.52
  -1   2  -3   25.61    1.93
  -2   2  -3    2.44    0.23
  -2   2  -3    2.51    0.26
   2  -2   3    2.91    0.33
  -3   2  -3    8.83    0.63
  -3   2  -3    8.98    0.71
   3  -2   3    6.71    0.93
   3  -2   3    8.01    0.69
  -4   2  -3    0.73    0.08
   4  -2   3    0.40    0.07
   4  -2   3    0.59    0.16
  -5   2  -3   10.11    0.84
   5  -2   3    9.02    0.82
   5  -2   3    9.81    1.12
  -6   2  -3    6.00    0.57
   6  -2   3    7.27    0.57
   6  -2   3    5.34    0.80
  -7   2  -3    1.87    0.27
   7  -2   3    2.27    0.27
   7  -2   3    3.15    0.42
  -8   2  -3    8.20    0.73
   8  -2   3    8.14    0.73
   9  -2   3    0.52    0.31
   9  -2   3    0.25    0.13
  10  -2   3    4.30    0.42
  10  -2   3    3.36    0.65
  11  -2   3    1.18    0.47
  11  -2   3    1.16    0.22
  12  -2   3    0.43    0.50
  12  -2   3    1.02    0.21
  13  -2   3    4.62    0.51
  14  -2   3   -0.03    0.57
  15  -2   3   -0.29    0.62
  16  -2   3    0.00    0.66
  17  -2   3   -0.80    0.68
  17   1  -3   -0.06    0.62
  16   1  -3    0.89    0.61
  16   1  -3    0.74    0.29
  15   1  -3    0.25    0.52
  15   1  -3   -0.06    0.25
  14   1  -3    2.55    0.64
  14   1  -3    3.37    0.43
  13   1  -3    0.94    0.46
  13   1  -3    0.14    0.24
  12   1  -3    3.46    0.45
  12   1  -3    3.95    0.65
  11   1  -3    3.73    0.45
  10   1  -3    6.57    0.65
   9   1  -3    4.46    0.48
   9   1  -3    4.93    0.71
   8   1  -3    0.13    0.13
   8   1  -3    0.00    0.25
   7   1  -3    1.49    0.22
   7   1  -3    1.97    0.32
   5   1  -3    6.58    0.60
   5   1  -3    6.70    0.80
   4   1  -3    4.64    0.43
   3   1  -3   26.28    2.91
   3   1  -3   24.59    1.98
   3   1  -3   27.94    2.21
   2   1  -3    2.40    0.22
   2   1  -3    2.96    0.25
   1   1  -3    5.73    0.45
   1   1  -3    5.86    0.50
   0   1  -3    5.36    0.46
  -1   1  -3    5.50    0.43
   1  -1   3    4.54    0.39
   2  -1   3    0.67    0.07
   2  -1   3    0.48    0.07
   3  -1   3    8.86    0.69
   3  -1   3    9.39    0.78
   3  -1   3    8.82    0.76
   4  -1   3    0.00    0.06
   4  -1   3    0.13    0.05
   4  -1   3    0.12    0.06
   4  -1   3    0.02    0.12
   5  -1   3    4.58    0.40
   5  -1   3    4.60    0.41
   5  -1   3    4.04    0.59
   6  -1   3    8.74    0.76
   7  -1   3    2.07    0.37
   7  -1   3    1.45    0.22
   7  -1   3    1.98    0.21
   8  -1   3    2.58    0.29
   8  -1   3    2.29    0.45
   9  -1   3    0.87    0.35
   9  -1   3    0.68    0.16
  10  -1   3   17.15    1.94
  10  -1   3   15.61    1.41
  11  -1   3    1.64    0.53
  11  -1   3    2.35    0.32
  12  -1   3    4.73    0.83
  12  -1   3    3.94    0.46
  13  -1   3    1.19    0.56
  14  -1   3    0.44    0.58
  14  -1   3    0.41    0.19
  15  -1   3   -0.18    0.60
  16  -1   3   -0.70    0.65
  17  -1   3   -0.39    0.68
  17   0  -3    0.00    0.60
  16   0  -3    1.27    0.59
  16   0  -3    0.81    0.32
  15   0  -3    0.02    0.26
  15   0  -3    0.04    0.51
  14   0  -3    3.39    0.43
  14   0  -3    2.10    0.59
  13   0  -3    1.30    0.46
  13   0  -3    0.58    0.26
  12   0  -3    4.97    0.76
  12   0  -3    3.98    0.51
  11   0  -3    2.10    0.32
  11   0  -3    2.05    0.48
  10   0  -3    6.15    0.81
  10   0  -3    5.09    0.56
   9   0  -3    5.02    0.50
   9   0  -3    4.34    0.71
   8   0  -3    2.35    0.32
   8   0  -3    3.28    0.45
   7   0  -3    3.40    0.37
   7   0  -3    3.58    0.49
   5   0  -3    2.48    0.35
   5   0  -3    2.02    0.25
   4   0  -3    1.33    0.18
   4   0  -3    0.95    0.13
   3   0  -3    7.80    0.66
  -3   0   3    7.49    0.58
  -2   0   3    0.88    0.09
   0   0  -3  105.93    8.52
   0   0   3   98.10    7.65
   1   0   3  287.77   23.82
   1   0   3  285.01   24.04
   1   0   3  282.26   21.37
   2   0   3   10.74    0.91
   2   0   3   10.82    0.81
   2   0   3   10.21    0.89
   3   0   3   51.79    3.87
   3   0   3   51.26    4.36
   4   0   3    1.01    0.13
   4   0   3    1.19    0.16
   5   0   3    2.88    0.24
   5   0   3    2.67    0.28
   5   0   3    2.37    0.27
   5   0   3    3.26    0.41
   6   0   3    6.96    0.60
   6   0   3    6.42    0.53
   6   0   3    5.95    0.85
   6   0   3    7.25    0.60
   7   0   3    8.86    1.13
   7   0   3    8.26    0.80
   7   0   3    9.87    0.80
   7   0   3    9.38    0.71
   8   0   3    7.30    0.59
   8   0   3    5.60    0.56
   9   0   3    2.50    0.47
   9   0   3    1.80    0.25
  10   0   3    5.46    0.50
  10   0   3    4.10    0.77
  11   0   3    0.99    0.20
  11   0   3    0.49    0.48
  12   0   3    2.17    0.30
  12   0   3    2.27    0.59
  13   0   3    0.41    0.19
  13   0   3   -0.06    0.52
  14   0   3    0.26    0.58
  14   0   3    0.96    0.23
  15   0   3   -0.32    0.59
  16   0   3   -0.13    0.62
  17  -1  -3    0.10    0.59
  16  -1  -3    1.75    0.38
  16  -1  -3    1.34    0.59
  15  -1  -3    0.43    0.52
  15  -1  -3    0.24    0.28
  14  -1  -3    3.82    0.49
  14  -1  -3    3.49    0.68
  13  -1  -3    1.00    0.45
  13  -1  -3    0.03    0.24
  12  -1  -3    0.91    0.27
  12  -1  -3    1.34    0.46
  11  -1  -3    0.85    0.23
  11  -1  -3    0.98    0.39
  10  -1  -3    0.47    0.19
  10  -1  -3    0.86    0.35
   9  -1  -3    1.70    0.25
   9  -1  -3    1.78    0.37
   8  -1  -3    8.65    0.83
   8  -1  -3    9.72    1.13
   7  -1  -3    2.89    0.35
   7  -1  -3    3.92    0.48
   6  -1  -3   10.87    1.27
   6  -1  -3   11.05    0.96
   5  -1  -3    7.29    0.69
   5  -1  -3    8.34    0.92
   4  -1  -3    9.62    1.11
   4  -1  -3    9.93    0.85
   3  -1  -3  127.97   10.26
  -3   1   3  117.45    9.19
   2  -1  -3   13.60    1.13
  -2   1   3   13.16    1.01
   1  -1  -3    2.33    0.20
  -1   1   3    2.24    0.19
  -1   1   3    1.66    0.21
   0  -1  -3   40.32    3.24
   0   1   3   37.52    3.27
   0   1   3   38.18    2.91
   1   1   3   15.58    1.16
   1   1   3   13.75    1.31
   1   1   3   16.77    1.30
   2   1   3   23.71    2.01
   2   1   3   24.01    1.78
   2   1   3   23.24    1.99
   3   1   3    6.01    0.55
   3   1   3    6.37    0.49
   3   1   3    6.45    0.54
   4   1   3   11.19    0.89
   4   1   3   10.36    0.79
   4   1   3   10.26    0.90
   4   1   3    9.46    1.20
   5   1   3    2.06    0.41
   5   1   3    2.80    0.27
   6   1   3    4.88    0.73
   6   1   3    5.22    0.50
   6   1   3    5.76    0.50
   6   1   3    5.64    0.44
   7   1   3    6.34    0.56
   7   1   3    6.14    0.56
   7   1   3    6.29    0.85
   7   1   3    5.91    0.49
   8   1   3   30.15    2.68
   8   1   3   31.70    2.69
   8   1   3   33.19    3.57
   9   1   3    0.16    0.36
   9   1   3    0.04    0.12
  10   1   3    0.15    0.40
  10   1   3    0.35    0.16
  11   1   3    0.37    0.17
  11   1   3   -0.12    0.44
  12   1   3    0.12    0.48
  12   1   3    0.19    0.17
  13   1   3    0.21    0.56
  13   1   3    1.61    0.27
  14   1   3    0.86    0.59
  15   1   3   -0.05    0.20
  15   1   3   -0.01    0.59
  16   1   3    0.23    0.64
  17  -2  -3   -0.30    0.58
  16  -2  -3    0.34    0.55
  16  -2  -3    0.27    0.28
  15  -2  -3   -0.04    0.51
  15  -2  -3    0.10    0.24
  14  -2  -3    5.58    0.88
  14  -2  -3    5.40    0.62
  13  -2  -3    0.09    0.45
  13  -2  -3    0.52    0.26
  12  -2  -3    1.61    0.32
  12  -2  -3    2.11    0.51
  11  -2  -3    0.38    0.38
  11  -2  -3    0.83    0.23
   9  -2  -3    4.49    0.59
   9  -2  -3    3.40    0.43
   8  -2  -3    2.29    0.37
   8  -2  -3    1.49    0.24
   7  -2  -3    1.20    0.20
   7  -2  -3    1.93    0.31
   6  -2  -3    9.96    1.10
   6  -2  -3    8.77    0.83
   5  -2  -3   -0.04    0.08
   4  -2  -3   10.51    1.05
  -4   2   3   13.07    1.05
  -4   2   3   12.94    0.93
   3  -2  -3   21.10    1.60
  -3   2   3   17.42    1.60
  -3   2   3   18.27    1.43
   2  -2  -3   50.71    4.52
  -2   2   3   55.97    4.56
  -2   2   3   55.05    4.05
   1  -2  -3   43.09    3.23
  -1   2   3   36.52    2.89
  -1   2   3   35.93    3.26
   1   2   3    5.34    0.42
   2   2   3   15.87    1.21
   2   2   3   15.61    1.36
   2   2   3   16.51    1.35
   2   2   3   15.78    1.78
   3   2   3   11.22    0.96
   3   2   3   11.24    0.95
   3   2   3   10.25    1.26
   3   2   3   11.53    0.85
   4   2   3   22.83    2.01
   4   2   3   24.54    1.79
   4   2   3   23.45    2.65
   6   2   3    6.52    0.94
   6   2   3    7.67    0.66
   6   2   3    7.58    0.58
   6   2   3    7.02    0.65
   7   2   3    0.10    0.09
   7   2   3   -0.04    0.10
   7   2   3    0.08    0.28
   7   2   3    0.24    0.11
   8   2   3    6.15    0.94
   8   2   3    6.48    0.61
   8   2   3    7.05    0.61
   9   2   3    2.31    0.51
   9   2   3    2.29    0.29
  10   2   3   16.97    1.91
  10   2   3   14.70    1.36
  11   2   3    0.18    0.44
  11   2   3   -0.02    0.16
  12   2   3    1.19    0.24
  12   2   3    1.06    0.52
  13   2   3   -0.03    0.53
  13   2   3    0.93    0.24
  14   2   3   -0.60    0.53
  14   2   3    0.33    0.22
  15   2   3    0.32    0.23
  15   2   3   -0.51    0.58
  16   2   3   -0.57    0.62
  17  -3  -3    0.26    0.59
  17  -3  -3    0.01    0.28
  16  -3  -3    0.56    0.29
  16  -3  -3    0.19    0.55
  15  -3  -3    0.23    0.52
  15  -3  -3    0.49    0.27
  14  -3  -3    2.81    0.63
  13  -3  -3    3.64    0.48
  13  -3  -3    3.79    0.69
  12  -3  -3    3.44    0.50
  12  -3  -3    5.08    0.77
  11  -3  -3    1.20    0.40
  11  -3  -3    0.85    0.23
  10  -3  -3    8.39    0.79
   9  -3  -3    4.75    0.76
   9  -3  -3    6.84    0.58
   8  -3  -3    0.77    0.27
   8  -3  -3    0.34    0.15
   7  -3  -3   33.64    2.66
   7  -3  -3   28.97    3.49
   6  -3  -3    0.45    0.19
   6  -3  -3    0.15    0.11
   5  -3  -3    0.12    0.10
   5  -3  -3    0.33    0.15
  -5   3   3    0.33    0.08
  -5   3   3    0.42    0.07
   4  -3  -3   36.98    2.82
  -4   3   3   31.67    2.83
  -4   3   3   31.90    2.52
   3  -3  -3    8.37    0.64
  -3   3   3    6.56    0.63
  -3   3   3    7.03    0.56
   2  -3  -3   36.87    2.94
  -2   3   3   33.98    2.64
  -2   3   3   34.25    2.97
   1  -3  -3   27.19    2.03
  -1   3   3   23.25    1.82
  -1   3   3   22.10    2.05
   0   3   3    7.31    0.60
   0   3   3    6.31    0.53
   1   3   3   25.34    2.08
   1   3   3   29.81    2.32
   2   3   3    7.63    0.93
   2   3   3    7.89    0.71
   2   3   3    8.75    0.70
   2   3   3    7.82    0.62
   3   3   3   37.10    3.18
   3   3   3   37.19    2.82
   3   3   3   38.47    3.15
   3   3   3   37.11    4.16
   4   3   3   56.69    4.80
   4   3   3   57.84    4.85
   4   3   3   57.14    6.34
   4   3   3   57.29    4.30
   5   3   3    2.00    0.24
   5   3   3    2.28    0.36
   6   3   3   12.59    1.14
   6   3   3   15.23    1.14
   6   3   3   12.27    1.01
   6   3   3   12.67    1.55
   7   3   3   -0.29    0.29
   7   3   3    0.13    0.12
   7   3   3    0.14    0.10
   7   3   3    0.30    0.12
   8   3   3    3.46    0.36
   8   3   3    2.98    0.36
   8   3   3    3.32    0.55
   8   3   3    3.02    0.31
   9   3   3    0.83    0.41
   9   3   3    1.17    0.21
  10   3   3    2.26    0.56
  10   3   3    2.85    0.35
  11   3   3    1.24    0.51
  11   3   3    1.77    0.27
  12   3   3    2.17    0.32
  12   3   3    1.96    0.60
  13   3   3    0.24    0.53
  13   3   3    0.22    0.21
  14   3   3    0.34    0.23
  14   3   3   -0.07    0.56
  15   3   3   -0.07    0.61
  15   3   3    0.53    0.25
  17  -4  -3    0.43    0.31
  17  -4  -3    0.09    0.59
  16  -4  -3    1.07    0.59
  16  -4  -3    1.34    0.34
  15  -4  -3    0.39    0.53
  15  -4  -3    0.12    0.25
  14  -4  -3    2.99    0.43
  14  -4  -3    1.62    0.57
  13  -4  -3    0.93    0.49
  13  -4  -3    1.64    0.32
  12  -4  -3    3.52    0.49
  12  -4  -3    4.30    0.76
  11  -4  -3    6.56    0.63
  11  -4  -3    5.21    0.84
  10  -4  -3   10.55    1.01
  10  -4  -3   11.62    1.36
   9  -4  -3    2.67    0.43
   9  -4  -3    2.23    0.31
   8  -4  -3    8.07    0.75
   7  -4  -3    3.60    0.46
   7  -4  -3    3.08    0.37
  -6   4   3    7.14    0.66
  -6   4   3    7.81    0.58
   5  -4  -3   10.79    0.93
  -5   4   3   10.11    0.92
  -5   4   3   10.96    0.82
   4  -4  -3   27.88    2.54
  -4   4   3   31.31    2.27
  -4   4   3   31.01    2.56
   3  -4  -3    1.29    0.18
  -3   4   3    1.39    0.20
  -3   4   3    1.46    0.16
   2  -4  -3   29.70    2.33
  -2   4   3   26.64    2.35
  -2   4   3   26.58    2.08
   1  -4  -3   12.57    1.07
   0   4   3   36.25    2.55
   0   4   3   30.89    2.84
   0   4   3   34.20    2.87
   1   4   3   29.26    2.49
   1   4   3   29.38    2.21
   2   4   3    0.96    0.11
   2   4   3    0.67    0.21
   2   4   3    0.74    0.13
   2   4   3    0.80    0.12
   3   4   3   12.83    1.42
   3   4   3   12.03    1.05
   3   4   3   11.85    1.07
   3   4   3   12.47    0.95
   5   4   3    0.49    0.11
   5   4   3    0.14    0.10
   5   4   3    0.31    0.25
   6   4   3   23.94    1.80
   6   4   3   23.42    2.02
   6   4   3   24.21    2.03
   6   4   3   23.12    2.69
   7   4   3    1.04    0.17
   7   4   3    0.97    0.17
   7   4   3    0.61    0.36
   7   4   3    1.20    0.16
   8   4   3    5.95    0.73
   8   4   3    4.19    0.48
   8   4   3    4.85    0.43
   8   4   3    4.82    0.50
   9   4   3    3.50    0.57
   9   4   3    2.64    0.37
  10   4   3    0.65    0.45
  10   4   3    0.63    0.20
  11   4   3    1.81    0.29
  11   4   3    1.65    0.55
  12   4   3    2.02    0.33
  12   4   3    2.69    0.63
  13   4   3    0.11    0.21
  13   4   3   -0.41    0.53
  14   4   3    0.13    0.60
  15   4   3   -0.05    0.65
  15   4   3    0.55    0.25
  17  -5  -3    0.58    0.32
  16  -5  -3    0.98    0.32
  16  -5  -3    0.03    0.56
  15  -5  -3   -0.06    0.29
  15  -5  -3   -0.33    0.51
  14  -5  -3    3.18    0.43
  14  -5  -3    1.49    0.59
  13  -5  -3    1.08    0.50
  13  -5  -3    1.81    0.34
  12  -5  -3    5.76    0.63
  12  -5  -3    5.24    0.88
  11  -5  -3    1.13    0.42
  11  -5  -3    1.41    0.28
  10  -5  -3    2.07    0.40
  10  -5  -3    0.94    0.25
   9  -5  -3    1.37    0.24
   9  -5  -3    1.14    0.32
   8  -5  -3    0.90    0.26
   8  -5  -3    0.70    0.19
   7  -5  -3    1.95    0.32
   7  -5  -3    2.27    0.28
  -7   5   3    1.60    0.20
   6  -5  -3   12.86    1.81
  -6   5   3   17.29    1.37
  -6   5   3   17.60    1.22
   5  -5  -3    4.66    0.53
   5  -5  -3    4.02    0.39
  -5   5   3    3.51    0.33
  -5   5   3    3.56    0.38
   4  -5  -3   54.10    6.65
  -4   5   3   63.24    4.53
  -4   5   3   63.38    5.10
   3  -5  -3    0.07    0.09
  -3   5   3    0.19    0.11
  -3   5   3    0.35    0.09
   2  -5  -3    0.70    0.11
  -2   5   3    0.75    0.12
  -2   5   3    0.74    0.11
   1  -5  -3    8.52    0.74
  -1   5   3    8.61    0.76
   0  -5  -3   37.64    3.74
   0   5   3   34.67    2.55
   0   5   3   33.80    2.87
   0   5   3   28.89    2.84
   1   5   3   14.46    1.28
   1   5   3   15.54    1.27
   1   5   3   14.51    1.13
   2   5   3    2.73    0.42
   2   5   3    2.19    0.23
   2   5   3    2.54    0.25
   2   5   3    1.96    0.27
   3   5   3    4.32    0.42
   3   5   3    5.23    0.62
   3   5   3    4.20    0.43
   3   5   3    4.24    0.37
   5   5   3    5.52    0.53
   5   5   3    6.17    0.77
   5   5   3    5.04    0.46
   6   5   3    3.62    0.69
   6   5   3    4.33    0.38
   6   5   3    4.13    0.44
   6   5   3    4.11    0.41
   7   5   3    0.77    0.17
   7   5   3    0.80    0.17
   7   5   3    0.96    0.15
   7   5   3    0.93    0.38
   8   5   3   16.78    1.42
   8   5   3   16.14    1.26
   8   5   3   15.67    1.41
   8   5   3   16.24    1.93
   9   5   3    1.39    0.49
   9   5   3    1.63    0.25
  10   5   3    4.01    0.47
  10   5   3    4.54    0.80
  11   5   3    1.64    0.28
  11   5   3    1.08    0.55
  12   5   3    1.88    0.30
  12   5   3    0.74    0.59
  13   5   3    0.10    0.58
  13   5   3    0.39    0.23
  14   5   3   -0.47    0.62
  14   5   3    0.02    0.22
  16  -6  -3    1.04    0.34
  15  -6  -3    0.66    0.33
  14  -6  -3    1.01    0.53
  14  -6  -3    2.06    0.37
  13  -6  -3    0.58    0.45
  13  -6  -3    0.23    0.27
  12  -6  -3    4.05    0.66
  12  -6  -3    3.60    0.49
  11  -6  -3    1.00    0.26
  11  -6  -3    0.64    0.36
  10  -6  -3   14.21    1.49
  10  -6  -3   10.34    1.11
   9  -6  -3    9.28    1.22
   9  -6  -3   10.71    0.93
   8  -6  -3    0.22    0.16
   8  -6  -3    0.50    0.22
  -8   6   3    0.29    0.10
  -8   6   3    0.51    0.12
   7  -6  -3    2.19    0.28
   7  -6  -3    2.39    0.34
  -7   6   3    1.92    0.23
  -7   6   3    2.32    0.25
   6  -6  -3   17.29    2.17
  -6   6   3   19.90    1.66
  -6   6   3   20.66    1.47
   5  -6  -3    0.20    0.15
   5  -6  -3    0.15    0.11
  -5   6   3    0.12    0.09
  -5   6   3    0.17    0.12
   4  -6  -3   36.77    2.88
   4  -6  -3   35.01    3.78
  -4   6   3   32.50    2.90
  -4   6   3   32.18    2.58
   3  -6  -3    3.52    0.33
   3  -6  -3    3.08    0.43
  -3   6   3    3.09    0.36
   2  -6  -3    0.28    0.09
   2  -6  -3    0.45    0.11
  -2   6   3    0.11    0.09
  -2   6   3    0.16    0.12
   1  -6  -3    4.96    0.61
  -1   6   3    4.93    0.49
  -1   6   3    5.35    0.43
   0  -6  -3    5.34    0.63
   0   6   3    4.66    0.50
   0   6   3    5.71    0.48
   0   6   3    5.02    0.44
  -1  -6  -3   17.79    2.10
   1   6   3   18.50    1.62
   1   6   3   20.28    1.60
   1   6   3   18.62    1.44
   2   6   3    3.45    0.31
   2   6   3    2.80    0.29
   2   6   3    2.67    0.34
   3   6   3    6.76    0.65
   3   6   3    8.15    0.89
   3   6   3    6.57    0.57
   4   6   3   23.53    2.06
   4   6   3   24.78    1.83
   4   6   3   24.72    2.04
   4   6   3   23.01    2.71
   5   6   3    1.70    0.23
   5   6   3    1.70    0.23
   5   6   3    1.95    0.38
   5   6   3    1.72    0.20
   6   6   3    7.46    0.71
   6   6   3    7.45    1.04
   6   6   3    7.78    0.64
   6   6   3    8.43    0.74
   7   6   3    1.18    0.17
   7   6   3    0.86    0.20
   7   6   3    0.98    0.20
   7   6   3    0.98    0.42
   8   6   3    5.69    0.58
   8   6   3    5.27    0.48
   8   6   3    5.18    0.54
   8   6   3    5.21    0.89
   9   6   3    2.58    0.34
   9   6   3    2.08    0.57
  10   6   3    1.18    0.25
  10   6   3    0.35    0.52
  11   6   3    0.75    0.56
  11   6   3    1.29    0.26
  12   6   3    1.94    0.31
  12   6   3    1.06    0.62
  13   6   3    0.35    0.22
  13   6   3    0.08    0.60
  14   6   3    0.17    0.23
  14   6   3   -0.15    0.66
  16  -7  -3    0.83    0.33
  15  -7  -3    0.03    0.31
  14  -7  -3    3.19    0.48
  13  -7  -3    1.01    0.32
  12  -7  -3    0.46    0.27
  11  -7  -3    0.25    0.24
  11  -7  -3    0.23    0.33
  10  -7  -3    5.57    0.62
  10  -7  -3    6.30    0.87
   9  -7  -3    3.04    0.42
   9  -7  -3    3.55    0.51
   8  -7  -3    1.76    0.29
   8  -7  -3    2.87    0.41
  -8   7   3    1.97    0.25
   7  -7  -3    1.27    0.21
   7  -7  -3    1.23    0.24
  -7   7   3    1.48    0.17
  -7   7   3    1.05    0.19
   6  -7  -3    6.85    0.82
  -5   7   3    6.14    0.51
   4  -7  -3   18.32    2.15
   4  -7  -3   19.09    1.64
  -4   7   3   20.39    1.66
  -4   7   3   19.30    1.47
   3  -7  -3    6.10    0.50
   3  -7  -3    6.32    0.65
  -3   7   3    4.13    0.52
  -3   7   3    4.42    0.45
   2  -7  -3    2.13    0.34
   2  -7  -3    2.03    0.25
  -2   7   3    2.59    0.30
  -2   7   3    2.50    0.24
   0  -7  -3   11.61    1.16
   0   7   3    9.79    0.80
   0   7   3    9.23    0.88
   0   7   3    9.92    0.91
  -1  -7  -3    0.72    0.18
   1   7   3    0.70    0.13
   1   7   3    0.73    0.13
   1   7   3    0.45    0.15
  -2  -7  -3   -0.11    0.14
   2   7   3   -0.11    0.10
   2   7   3   -0.17    0.12
   2   7   3    0.00    0.10
   3   7   3    0.23    0.14
   3   7   3    0.43    0.11
   3   7   3    0.24    0.11
   4   7   3   11.15    0.88
   4   7   3    9.55    0.78
   4   7   3    9.49    0.89
   4   7   3    8.95    1.17
   5   7   3    4.40    0.42
   5   7   3    4.87    0.50
   6   7   3   11.19    0.97
   6   7   3   10.46    0.95
   6   7   3   10.09    1.30
   6   7   3   10.86    0.85
   7   7   3    3.67    0.42
   7   7   3    3.94    0.48
   7   7   3    3.91    0.70
   7   7   3    3.85    0.38
   8   7   3    1.41    0.26
   8   7   3    1.79    0.23
   8   7   3    1.23    0.49
   8   7   3    1.85    0.28
   9   7   3    2.37    0.60
   9   7   3    2.90    0.37
  10   7   3    0.06    0.52
  10   7   3    0.28    0.19
  11   7   3    0.70    0.23
  11   7   3    0.33    0.55
  12   7   3    0.53    0.24
  12   7   3    0.20    0.59
  13   7   3    0.32    0.24
  13   7   3   -0.18    0.62
  16  -8  -3    0.34    0.35
  15  -8  -3    0.03    0.32
  14  -8  -3    0.86    0.35
  13  -8  -3    0.43    0.30
  12  -8  -3    1.59    0.34
  11  -8  -3    0.15    0.25
  10  -8  -3    0.58    0.25
   9  -8  -3    7.01    0.70
   8  -8  -3    7.74    0.79
  -8   8   3    7.95    0.79
  -8   8   3    9.41    0.68
   7  -8  -3   12.62    1.11
  -7   8   3   12.46    1.11
  -7   8   3   12.35    0.98
   6  -8  -3    3.03    0.34
   6  -8  -3    3.06    0.47
  -6   8   3    2.61    0.30
  -6   8   3    2.49    0.36
   5  -8  -3    2.60    0.30
   5  -8  -3    2.93    0.42
  -5   8   3    2.06    0.29
  -5   8   3    2.37    0.27
   4  -8  -3    9.39    1.06
   4  -8  -3    8.73    0.81
   3  -8  -3    0.05    0.13
   3  -8  -3    0.09    0.10
  -3   8   3    0.21    0.11
  -3   8   3    0.15    0.14
   2  -8  -3    0.58    0.12
   2  -8  -3    0.66    0.16
  -2   8   3    0.52    0.13
  -2   8   3    0.46    0.16
   1  -8  -3    0.66    0.18
  -1   8   3    0.89    0.14
  -1   8   3    0.91    0.17
   0  -8  -3   13.30    1.37
   0   8   3   11.94    0.94
   0   8   3   11.45    1.04
   0   8   3   11.19    1.06
  -1  -8  -3    5.47    0.78
   1   8   3    7.40    0.63
   1   8   3    6.91    0.55
   1   8   3    6.66    0.60
  -2  -8  -3    9.49    1.10
   2   8   3    9.32    0.86
   2   8   3    8.92    0.75
   2   8   3    9.68    0.83
  -3  -8  -3    2.36    0.36
   3   8   3    2.61    0.34
   3   8   3    2.36    0.29
   3   8   3    2.64    0.28
   4   8   3    1.16    0.20
   4   8   3    0.91    0.18
   5   8   3    3.96    0.44
   5   8   3    3.51    0.37
   6   8   3    4.37    0.72
   6   8   3    4.31    0.42
   6   8   3    4.49    0.46
   6   8   3    4.03    0.51
   7   8   3    1.94    0.29
   7   8   3    2.32    0.31
   7   8   3    2.10    0.26
   7   8   3    2.16    0.53
   8   8   3    9.85    1.30
   8   8   3    8.82    0.90
   8   8   3   10.18    0.81
   8   8   3   10.62    0.94
   9   8   3    0.12    0.18
   9   8   3    1.43    0.54
  10   8   3    0.42    0.56
  10   8   3    0.87    0.24
  11   8   3   -0.01    0.20
  11   8   3   -0.17    0.57
  12   8   3    0.43    0.23
  12   8   3    0.10    0.63
  13   8   3   -0.10    0.68
  16  -9  -3    0.00    0.34
  15  -9  -3    0.29    0.36
  14  -9  -3    1.62    0.40
  13  -9  -3    0.21    0.32
  12  -9  -3    6.42    0.72
  10  -9  -3    0.65    0.26
   9  -9  -3    2.04    0.32
   8  -9  -3    3.89    0.46
  -8   9   3    4.02    0.48
  -8   9   3    4.12    0.39
  -7   9   3    3.28    0.42
  -7   9   3    3.27    0.35
  -6   9   3   12.85    1.04
  -6   9   3   13.74    1.19
   5  -9  -3    0.89    0.18
  -5   9   3    0.70    0.20
  -5   9   3    0.75    0.16
   4  -9  -3    5.81    0.54
  -4   9   3    5.59    0.50
  -4   9   3    5.78    0.59
   3  -9  -3    0.73    0.16
  -3   9   3    0.89    0.19
   2  -9  -3   14.43    1.91
  -2   9   3   18.21    1.32
  -2   9   3   18.87    1.49
   1  -9  -3    7.33    0.97
  -1   9   3    8.31    0.67
  -1   9   3    8.84    0.77
   0  -9  -3   10.93    1.18
   0   9   3    9.87    0.81
   0   9   3    9.84    0.92
   0   9   3    9.78    0.89
   1   9   3   22.42    1.85
   1   9   3   20.51    1.82
   1   9   3   20.88    1.63
   2   9   3   17.64    1.50
   2   9   3   17.18    1.35
   2   9   3   17.26    1.53
  -3  -9  -3    0.64    0.23
   3   9   3    0.43    0.19
   3   9   3    0.55    0.16
   3   9   3    0.39    0.15
  -4  -9  -3   14.01    1.57
   4   9   3   13.48    1.19
   4   9   3   12.78    1.06
   4   9   3   13.96    1.22
   5   9   3    3.50    0.33
   5   9   3    2.63    0.36
   6   9   3    2.82    0.33
   6   9   3    3.62    0.44
   6   9   3    2.64    0.37
   7   9   3    0.63    0.19
   7   9   3    0.43    0.20
   7   9   3    0.28    0.23
   7   9   3    1.25    0.42
   8   9   3    1.09    0.52
   8   9   3    1.19    0.29
   8   9   3    1.08    0.22
   8   9   3    1.51    0.25
   9   9   3    0.53    0.21
   9   9   3    0.33    0.54
  10   9   3    0.57    0.59
  10   9   3    1.16    0.26
  11   9   3   -0.71    0.60
  11   9   3    0.17    0.21
  12   9   3   -0.08    0.66
  15 -10  -3    0.36    0.37
  14 -10  -3    0.03    0.34
  13 -10  -3    1.13    0.37
  12 -10  -3    2.96    0.45
  11 -10  -3    0.88    0.31
  10 -10  -3    2.36    0.37
   9 -10  -3    2.30    0.33
   8 -10  -3    1.36    0.27
  -8  10   3    1.52    0.26
  -8  10   3    1.54    0.22
   7 -10  -3    3.46    0.44
  -7  10   3    4.52    0.41
  -6  10   3    5.51    0.58
  -6  10   3    5.59    0.50
   5 -10  -3    9.77    0.77
  -5  10   3    7.77    0.69
  -5  10   3    7.44    0.81
   4 -10  -3    7.80    0.67
  -4  10   3    6.90    0.61
  -4  10   3    6.96    0.72
   3 -10  -3    0.98    0.19
  -3  10   3    1.48    0.23
   2 -10  -3   30.19    2.61
  -2  10   3   30.40    2.34
  -2  10   3   31.65    2.65
  -1  10   3    0.93    0.23
  -1  10   3    1.50    0.21
   0  10   3    1.13    0.19
   0  10   3    0.86    0.18
   0  10   3    0.85    0.22
  -1 -10  -3    3.85    0.64
   1  10   3    4.98    0.45
   1  10   3    5.01    0.48
   1  10   3    5.59    0.55
  -2 -10  -3    4.72    0.63
   2  10   3    5.40    0.44
   2  10   3    3.90    0.45
   2  10   3    3.98    0.53
  -3 -10  -3    8.83    0.96
   3  10   3    7.36    0.76
   3  10   3    6.97    0.65
   3  10   3    7.73    0.72
  -4 -10  -3    8.65    0.95
   4  10   3    7.57    0.71
   4  10   3    7.29    0.75
   4  10   3    6.73    0.63
   5  10   3    2.95    0.34
   5  10   3    2.63    0.37
   5  10   3    3.99    0.45
   6  10   3    6.07    0.63
   6  10   3    5.71    0.54
   6  10   3    5.50    0.58
   7  10   3    0.11    0.19
   7  10   3    0.37    0.24
   7  10   3   -0.14    0.18
   8  10   3    0.43    0.27
   8  10   3    0.58    0.21
   9  10   3    0.58    0.50
   9  10   3   -0.05    0.20
  10  10   3    1.94    0.31
  10  10   3    1.64    0.59
  11  10   3    0.29    0.64
  15 -11  -3   -0.14    0.36
  14 -11  -3    1.00    0.40
  13 -11  -3    0.42    0.34
  12 -11  -3    1.33    0.35
  11 -11  -3    0.30    0.29
  10 -11  -3    1.84    0.34
   9 -11  -3    6.80    0.69
   8 -11  -3    2.97    0.39
  -8  11   3    2.56    0.37
  -8  11   3    3.09    0.35
   7 -11  -3    1.93    0.30
  -7  11   3    2.03    0.32
  -7  11   3    2.15    0.28
   6 -11  -3    1.72    0.30
  -6  11   3    3.47    0.44
  -6  11   3    2.77    0.32
   5 -11  -3    1.00    0.20
  -5  11   3    0.91    0.20
  -5  11   3    1.05    0.25
  -4  11   3   17.37    1.48
  -4  11   3   15.65    1.29
   3 -11  -3    5.07    0.46
  -3  11   3    4.05    0.53
  -3  11   3    4.01    0.43
   2 -11  -3   10.94    0.90
  -2  11   3    9.29    0.82
  -2  11   3    9.69    0.95
  -1  11   3    4.22    0.44
  -1  11   3    4.65    0.53
   0  11   3    3.98    0.40
   0  11   3    3.36    0.48
   0  11   3    3.24    0.37
   1  11   3    3.72    0.43
   1  11   3    3.18    0.37
   1  11   3    3.79    0.40
   2  11   3    0.04    0.21
   2  11   3    0.42    0.17
   2  11   3    0.40    0.18
   3  11   3    1.70    0.25
   3  11   3    1.38    0.24
   3  11   3    1.69    0.28
  -4 -11  -3    1.60    0.33
   4  11   3    1.38    0.24
   4  11   3    1.45    0.29
   4  11   3    1.53    0.25
  -5 -11  -3    0.76    0.30
   5  11   3    0.69    0.25
   5  11   3    0.67    0.20
   5  11   3    0.71    0.19
  -6 -11  -3    7.62    1.13
   6  11   3    9.24    0.76
   6  11   3    9.05    0.85
   6  11   3   10.73    0.90
  -7 -11  -3    0.25    0.30
   7  11   3    0.22    0.26
   7  11   3    0.14    0.20
   7  11   3    0.10    0.20
   8  11   3    1.14    0.27
   9  11   3   -0.06    0.21
  14 -12  -3    2.59    0.50
  13 -12  -3    0.23    0.34
  12 -12  -3    0.10    0.31
  11 -12  -3    0.36    0.30
  10 -12  -3    0.14    0.26
   9 -12  -3   -0.03    0.22
   8 -12  -3    4.22    0.57
  -8  12   3    5.91    0.64
  -8  12   3    6.10    0.52
   7 -12  -3    2.03    0.31
  -7  12   3    1.88    0.34
  -7  12   3    2.02    0.28
  -6  12   3    9.73    0.95
  -6  12   3    9.72    0.81
   5 -12  -3    0.52    0.19
  -5  12   3    0.41    0.19
  -5  12   3    0.26    0.24
  -4  12   3    2.07    0.28
  -4  12   3    2.76    0.37
   3 -12  -3    0.66    0.19
  -3  12   3    0.57    0.25
  -3  12   3    0.65    0.20
   2 -12  -3    2.20    0.31
  -2  12   3    2.12    0.34
  -2  12   3    2.12    0.29
  -1  12   3    7.19    0.66
  -1  12   3    8.07    0.78
   0  12   3    9.35    0.82
   0  12   3   10.44    0.91
   0  12   3   10.23    0.96
   1  12   3    0.18    0.18
   1  12   3    0.42    0.17
   1  12   3    0.75    0.24
   2  12   3    4.35    0.45
   2  12   3    4.64    0.49
   2  12   3    4.89    0.56
   3  12   3    0.24    0.18
   3  12   3    0.30    0.17
   3  12   3    0.33    0.23
   4  12   3    0.37    0.19
   4  12   3    0.10    0.23
   4  12   3    0.41    0.19
   5  12   3    0.20    0.19
   5  12   3    0.16    0.18
   5  12   3    0.32    0.24
   6  12   3    0.12    0.25
   6  12   3    0.24    0.19
   6  12   3   -0.01    0.19
   7  12   3    0.04    0.27
   7  12   3    0.19    0.21
   7  12   3   -0.01    0.21
  -8 -12  -3    0.90    0.37
   8  12   3    0.72    0.25
  -9 -12  -3    0.07    0.34
 -10 -12  -3    0.01    0.36
  13 -13  -3    0.28    0.36
  12 -13  -3    0.60    0.35
  11 -13  -3    0.21    0.29
  10 -13  -3    1.69    0.35
   9 -13  -3    0.32    0.24
   8 -13  -3    0.13    0.22
  -8  13   3    0.12    0.26
  -8  13   3    0.39    0.20
   7 -13  -3    1.51    0.26
  -7  13   3    0.89    0.28
  -7  13   3    0.92    0.22
   6 -13  -3   13.33    1.13
  -6  13   3   11.57    1.01
  -6  13   3   12.44    1.17
   5 -13  -3    0.07    0.18
  -5  13   3    0.31    0.20
  -5  13   3   -0.05    0.24
   4 -13  -3    0.77    0.21
  -4  13   3    0.71    0.27
  -4  13   3    0.59    0.21
   3 -13  -3    0.16    0.17
  -3  13   3    0.22    0.24
  -3  13   3    0.33    0.19
   2 -13  -3    3.02    0.42
  -2  13   3    5.04    0.55
  -2  13   3    4.26    0.44
   1 -13  -3    1.80    0.26
  -1  13   3    1.36    0.25
  -1  13   3    1.58    0.31
   0  13   3    0.65    0.26
   0  13   3    1.13    0.22
   0  13   3    1.04    0.23
   1  13   3    0.54    0.18
   1  13   3    0.46    0.19
   1  13   3    0.77    0.26
   2  13   3    2.14    0.37
   2  13   3    3.10    0.36
   2  13   3    2.53    0.32
   3  13   3    0.28    0.20
   3  13   3    0.59    0.21
   3  13   3    0.64    0.26
   4  13   3    0.41    0.27
   4  13   3    0.68    0.21
   4  13   3    0.32    0.21
   5  13   3   -0.11    0.24
   5  13   3   -0.28    0.17
   5  13   3    0.02    0.18
   6  13   3    0.18    0.19
   6  13   3   -0.07    0.20
   6  13   3   -0.10    0.25
   7  13   3   -0.06    0.28
   7  13   3    0.08    0.22
  12 -14  -3    0.28    0.34
  11 -14  -3    0.15    0.30
  10 -14  -3    2.95    0.44
   9 -14  -3    1.03    0.30
   8 -14  -3    0.40    0.24
  -8  14   3    0.16    0.28
  -8  14   3    0.15    0.21
   7 -14  -3    2.34    0.35
  -7  14   3    2.42    0.33
  -7  14   3    1.98    0.40
   6 -14  -3    0.67    0.24
  -6  14   3    1.24    0.25
  -6  14   3    1.18    0.31
   5 -14  -3    0.14    0.20
  -5  14   3    0.44    0.21
  -5  14   3    0.02    0.26
   4 -14  -3    3.21    0.41
  -4  14   3    2.99    0.46
  -4  14   3    3.96    0.40
   3 -14  -3    1.51    0.28
  -3  14   3    1.86    0.28
  -3  14   3    1.93    0.36
   2 -14  -3    0.17    0.18
  -2  14   3    0.27    0.25
  -2  14   3    0.54    0.21
  -1  14   3    3.33    0.42
   0  14   3    1.24    0.31
   0  14   3    1.75    0.27
   1  14   3    0.15    0.25
   1  14   3    0.27    0.20
   1  14   3    0.06    0.18
   2  14   3    0.27    0.26
   2  14   3    0.07    0.19
   2  14   3    0.02    0.19
   3  14   3    1.09    0.30
   3  14   3    1.16    0.26
   3  14   3    0.97    0.24
   4  14   3    1.11    0.25
   4  14   3    1.10    0.26
   4  14   3    0.79    0.30
   5  14   3   -0.21    0.26
   5  14   3    0.13    0.20
   5  14   3   -0.04    0.19
   6  14   3    0.42    0.23
   6  14   3    0.49    0.30
   7  14   3    0.08    0.29
   7  14   3   -0.14    0.22
  11 -15  -3    0.86    0.34
  10 -15  -3    0.68    0.31
   9 -15  -3    0.11    0.27
   8 -15  -3    0.28    0.25
  -8  15   3    0.30    0.23
  -8  15   3    0.19    0.30
   7 -15  -3    0.28    0.24
  -7  15   3    0.34    0.30
  -7  15   3    0.42    0.23
   6 -15  -3    0.94    0.25
  -6  15   3    0.55    0.32
  -6  15   3    1.01    0.26
   5 -15  -3    0.18    0.21
  -5  15   3    0.11    0.28
  -5  15   3   -0.11    0.20
   4 -15  -3    0.24    0.20
  -4  15   3    0.16    0.28
  -4  15   3    0.25    0.22
   3 -15  -3    0.16    0.20
  -3  15   3    0.24    0.21
  -3  15   3    0.32    0.28
   2 -15  -3    1.16    0.24
  -2  15   3    0.98    0.25
  -2  15   3    0.75    0.30
   1 -15  -3    0.08    0.19
  -1  15   3    0.07    0.26
  -1  15   3    0.64    0.21
   0  15   3    1.85    0.30
   0  15   3    1.40    0.34
   1  15   3   -0.03    0.20
   1  15   3    0.18    0.20
   1  15   3    0.12    0.27
   2  15   3    0.96    0.24
   2  15   3    0.66    0.29
   2  15   3    0.56    0.23
   3  15   3    0.43    0.21
   3  15   3    0.41    0.28
   3  15   3    0.54    0.21
   4  15   3   -0.12    0.27
   4  15   3    0.10    0.20
   5  15   3   -0.03    0.28
   6  15   3    0.22    0.31
   9 -16  -3   -0.15    0.27
   8 -16  -3    0.07    0.26
  -8  16   3   -0.19    0.23
  -8  16   3    0.04    0.31
   7 -16  -3    0.45    0.26
  -7  16   3    0.99    0.36
  -7  16   3    0.48    0.25
   6 -16  -3    0.43    0.24
  -6  16   3    0.35    0.25
  -6  16   3    0.56    0.32
   5 -16  -3   -0.08    0.21
  -5  16   3   -0.24    0.22
  -5  16   3   -0.23    0.29
   4 -16  -3    1.02    0.26
  -4  16   3    0.91    0.27
  -4  16   3    0.82    0.33
   3 -16  -3    0.03    0.21
  -3  16   3    0.11    0.22
  -3  16   3   -0.11    0.32
   2 -16  -3    0.01    0.19
  -2  16   3   -0.06    0.30
  -2  16   3    0.15    0.22
   1 -16  -3    0.14    0.21
  -1  16   3    0.00    0.21
  -1  16   3    0.22    0.29
   0 -16  -3    0.22    0.21
   0  16   3    0.32    0.22
   0  16   3    0.06    0.28
   1  16   3    0.53    0.30
   2  16   3   -0.07    0.28
   3  16   3    0.11    0.29
   4  16   3    0.20    0.29
  -8  17   3    0.06    0.33
  -7  17   3   -0.30    0.31
  -6  17   3   -0.12    0.32
  -5  17   3    0.56    0.34
  -4  17   3    0.71    0.34
  -3  17   3    0.03    0.32
  -2  17   3    0.18    0.33
  -1  17   3    0.17    0.30
   0  17   3   -0.23    0.29
   1  17   3    0.19    0.31
   2  17   3    0.23    0.31
  -4  18   3    0.46    0.35
  -3  18   3   -0.08    0.33
   2  19  -4    0.09    0.33
   1  19  -4    0.21    0.32
  -1 -19   4   -0.01    0.36
   0  19  -4    0.11    0.30
   0 -19   4    0.52    0.37
  -1  19  -4    0.00    0.30
   1 -19   4   -0.11    0.36
  -2  19  -4   -0.47    0.31
   2 -19   4   -0.01    0.34
  -3  19  -4    0.16    0.34
   3 -19   4    0.21    0.37
  -4  19  -4    0.11    0.35
   4 -19   4    0.11    0.38
  -5  19  -4    0.06    0.35
   5 -19   4    0.20    0.40
  -6  19  -4    0.20    0.32
   6 -19   4    0.20    0.43
  -7  19  -4    0.34    0.32
  -8  19  -4   -0.13    0.31
   4  18  -4    0.14    0.32
  -4 -18   4    0.13    0.36
   3  18  -4    0.60    0.32
  -3 -18   4    0.14    0.36
   2  18  -4   -0.02    0.21
   2  18  -4   -0.09    0.30
  -2 -18   4   -0.32    0.33
   1  18  -4   -0.20    0.19
   1  18  -4   -0.06    0.29
  -1 -18   4   -0.08    0.33
   0  18  -4   -0.08    0.27
   0 -18   4   -0.39    0.31
  -1  18  -4    0.06    0.21
  -1  18  -4    0.23    0.29
   1 -18   4   -0.39    0.33
  -2  18  -4   -0.15    0.30
  -2  18  -4    0.02    0.21
   2 -18   4    0.18    0.34
  -3  18  -4   -0.38    0.31
  -3  18  -4   -0.06    0.21
   3 -18   4   -0.31    0.33
  -4  18  -4    0.04    0.22
  -4  18  -4   -0.08    0.32
   4 -18   4   -0.13    0.36
  -5  18  -4    0.97    0.27
  -5  18  -4    0.80    0.35
   5 -18   4    1.49    0.46
  -6  18  -4   -0.01    0.32
  -6  18  -4    0.29    0.23
   6 -18   4    0.20    0.40
  -7  18  -4    0.27    0.33
  -7  18  -4    0.25    0.23
   7 -18   4    0.21    0.42
  -8  18  -4    0.05    0.22
  -8  18  -4    0.38    0.33
   8 -18   4    0.27    0.42
  -9  18  -4    0.72    0.35
  -9  18  -4    0.45    0.25
   9 -18   4    0.18    0.46
   6  17  -4    0.22    0.31
  -6 -17   4   -0.30    0.34
   5  17  -4    0.17    0.30
  -5 -17   4   -0.15    0.34
   4  17  -4    0.30    0.21
   4  17  -4   -0.05    0.23
   4  17  -4   -0.16    0.29
  -4 -17   4    0.13    0.34
   3  17  -4   -0.09    0.20
   3  17  -4   -0.08    0.19
   3  17  -4   -0.66    0.27
  -3 -17   4   -0.07    0.32
   2  17  -4    0.17    0.19
   2  17  -4    0.02    0.27
   2  17  -4    0.02    0.21
  -2 -17   4   -0.19    0.34
   1  17  -4    0.06    0.21
   1  17  -4    0.14    0.20
   1  17  -4   -0.38    0.25
  -1 -17   4   -0.19    0.31
   0  17  -4   -0.51    0.26
   0  17  -4    0.05    0.20
   0  17  -4    0.07    0.18
   0 -17   4    0.04    0.32
  -1  17  -4    0.36    0.22
  -1  17  -4    0.45    0.30
   1 -17   4    0.44    0.34
  -2  17  -4    0.35    0.21
  -2  17  -4   -0.06    0.29
   2 -17   4    0.01    0.33
  -3  17  -4   -0.48    0.29
  -3  17  -4   -0.08    0.20
   3 -17   4   -0.19    0.32
  -4  17  -4    0.06    0.31
  -4  17  -4    0.17    0.21
   4 -17   4   -0.06    0.35
  -5  17  -4    0.39    0.22
  -5  17  -4    0.67    0.32
   5 -17   4    0.58    0.38
  -6  17  -4    0.38    0.22
  -6  17  -4    0.71    0.32
   6 -17   4    0.71    0.40
  -7  17  -4    4.01    0.47
  -7  17  -4    3.83    0.53
   7 -17   4    5.39    0.82
  -8  17  -4    0.21    0.31
  -8  17  -4   -0.09    0.21
   8 -17   4    0.39    0.41
  -9  17  -4    0.90    0.25
  -9  17  -4    1.12    0.34
   9 -17   4    0.67    0.46
  10 -17   4    0.34    0.46
  11 -17   4    0.60    0.50
  -7 -16   4    0.14    0.37
   6  16  -4    0.12    0.29
   6  16  -4    0.02    0.22
  -6 -16   4   -0.15    0.33
   5  16  -4    0.38    0.30
   5  16  -4    0.35    0.23
   5  16  -4    0.34    0.21
  -5 -16   4    0.00    0.33
   4  16  -4    0.51    0.22
   4  16  -4    0.55    0.21
   4  16  -4    0.53    0.29
  -4 -16   4    0.50    0.34
   3  16  -4    0.09    0.25
   3  16  -4   -0.17    0.19
   3  16  -4    0.08    0.19
  -3 -16   4   -0.06    0.31
   2  16  -4    0.39    0.20
   2  16  -4    0.64    0.26
   2  16  -4    0.55    0.20
  -2 -16   4    0.45    0.34
   1  16  -4    4.30    0.53
   1  16  -4    3.41    0.44
   1  16  -4    3.47    0.44
   0  16  -4    0.32    0.27
   0  16  -4    0.59    0.20
   0  16  -4    0.50    0.20
   0 -16   4    0.66    0.33
  -1  16  -4    2.67    0.36
  -1  16  -4    2.61    0.41
  -1  16  -4    2.74    0.35
   1 -16   4    3.36    0.53
  -2  16  -4    0.52    0.27
  -2  16  -4    0.10    0.18
   2 -16   4   -0.02    0.31
  -3  16  -4    1.06    0.24
  -3  16  -4    1.41    0.34
   3 -16   4    1.40    0.38
  -4  16  -4    0.28    0.30
  -4  16  -4    0.22    0.20
   4 -16   4    0.36    0.34
  -5  16  -4    0.38    0.30
  -5  16  -4    0.57    0.22
   5 -16   4    0.28    0.34
  -6  16  -4    1.77    0.38
  -6  16  -4    2.05    0.31
   6 -16   4    2.78    0.54
  -7  16  -4    1.99    0.31
  -7  16  -4    2.26    0.40
   7 -16   4    2.66    0.57
  -8  16  -4    0.98    0.25
  -8  16  -4    0.55    0.32
   8 -16   4    1.70    0.49
  -9  16  -4    2.92    0.43
  -9  16  -4    3.32    0.36
   9 -16   4    1.82    0.52
  10 -16   4    0.24    0.44
  11 -16   4    0.36    0.47
  12 -16   4   -0.13    0.50
  -9 -15   4   -0.11    0.36
  -8 -15   4    0.32    0.36
   7  15  -4   -0.07    0.21
  -7 -15   4   -0.13    0.35
   6  15  -4    0.59    0.27
   6  15  -4    0.13    0.21
   6  15  -4    0.28    0.22
  -6 -15   4    0.06    0.35
   5  15  -4    0.55    0.21
   5  15  -4    0.46    0.21
   5  15  -4    0.43    0.27
  -5 -15   4    0.21    0.32
   4  15  -4    0.40    0.20
   4  15  -4    0.63    0.25
   4  15  -4    0.64    0.20
  -4 -15   4    0.15    0.32
   3  15  -4    1.58    0.30
   3  15  -4    1.46    0.25
   3  15  -4    1.49    0.26
  -3 -15   4    1.63    0.41
   2  15  -4    0.10    0.17
   2  15  -4   -0.34    0.22
   2  15  -4   -0.12    0.17
  -2 -15   4   -0.07    0.29
   1  15  -4    0.71    0.19
   1  15  -4    0.62    0.20
   1  15  -4    0.53    0.26
  -1 -15   4    0.47    0.33
   0  15  -4    0.38    0.26
   0  15  -4    0.42    0.18
   0  15  -4    0.43    0.19
   0 -15   4    0.65    0.32
  -1  15  -4    0.18    0.18
  -1  15  -4    0.49    0.26
  -1  15  -4    0.23    0.16
   1 -15   4   -0.07    0.28
  -2  15  -4    1.51    0.23
  -2  15  -4    1.44    0.26
  -2  15  -4    1.10    0.32
   2 -15   4    1.81    0.40
  -3  15  -4    4.29    0.44
  -3  15  -4    4.30    0.57
  -4  15  -4    0.51    0.20
  -4  15  -4    0.48    0.27
   4 -15   4    0.49    0.33
  -5  15  -4    4.88    0.60
  -5  15  -4    4.29    0.48
   5 -15   4    5.94    0.78
  -6  15  -4    0.30    0.20
  -6  15  -4    0.44    0.28
   6 -15   4    0.49    0.35
  -7  15  -4    1.24    0.24
  -7  15  -4    1.00    0.31
   7 -15   4    1.10    0.40
  -8  15  -4   -0.18    0.27
  -8  15  -4   -0.16    0.19
   8 -15   4    0.20    0.36
  -9  15  -4    3.64    0.39
  -9  15  -4    3.59    0.46
   9 -15   4    2.57    0.57
  10 -15   4    0.03    0.42
  11 -15   4    0.71    0.47
  12 -15   4   -0.09    0.48
  13 -15   4    0.32    0.52
 -10 -14   4    0.24    0.37
  -9 -14   4    0.69    0.37
   8  14  -4    0.59    0.25
  -8 -14   4    0.42    0.34
   7  14  -4    1.00    0.27
   7  14  -4    1.17    0.32
  -7 -14   4    1.34    0.40
   6  14  -4    0.97    0.22
   6  14  -4    0.48    0.21
   6  14  -4    1.01    0.28
  -6 -14   4    0.59    0.35
   5  14  -4    1.41    0.28
   5  14  -4    1.14    0.22
   5  14  -4    1.22    0.25
  -5 -14   4    0.83    0.36
   4  14  -4    1.82    0.29
  -4 -14   4    1.62    0.41
   3  14  -4    4.33    0.46
   3  14  -4    2.99    0.34
   3  14  -4    3.21    0.38
  -3 -14   4    2.03    0.50
   2  14  -4    0.25    0.22
   2  14  -4    0.10    0.16
   2  14  -4   -0.11    0.16
  -2 -14   4   -0.14    0.28
   1  14  -4    5.40    0.56
   1  14  -4    4.35    0.45
   1  14  -4    4.80    0.49
  -1 -14   4    3.81    0.73
   0  14  -4    0.63    0.17
   0  14  -4    0.66    0.24
   0  14  -4    0.16    0.16
   0 -14   4    0.30    0.29
  -2  14  -4   10.05    0.93
  -2  14  -4    8.39    0.79
  -2  14  -4    8.92    0.86
   2 -14   4   11.60    1.20
  -3  14  -4    1.60    0.31
   3 -14   4    1.52    0.37
  -4  14  -4    3.52    0.37
  -4  14  -4    3.82    0.47
   4 -14   4    2.36    0.52
  -5  14  -4    8.29    0.84
  -5  14  -4    7.10    0.71
   5 -14   4   10.11    1.10
  -6  14  -4    1.43    0.25
  -6  14  -4    1.68    0.31
   6 -14   4    1.61    0.44
  -7  14  -4    5.49    0.53
  -7  14  -4    5.69    0.64
  -8  14  -4   -0.17    0.19
  -8  14  -4   -0.04    0.26
   8 -14   4    0.32    0.35
  -9  14  -4   -0.16    0.18
  -9  14  -4   -0.35    0.25
   9 -14   4   -0.13    0.37
  10 -14   4   -0.07    0.39
  11 -14   4   -0.19    0.42
  12 -14   4   -0.30    0.45
  13 -14   4   -0.15    0.49
  14 -14   4    0.18    0.53
 -11 -13   4    0.48    0.40
 -10 -13   4    0.52    0.37
   9  13  -4    0.00    0.24
  -9 -13   4    0.08    0.33
   8  13  -4    0.45    0.23
  -8 -13   4    0.24    0.33
   7  13  -4    0.88    0.23
   7  13  -4    0.68    0.24
   7  13  -4    0.63    0.28
  -7 -13   4    0.79    0.33
   6  13  -4    1.65    0.24
   6  13  -4    2.00    0.30
   6  13  -4    1.18    0.27
  -6 -13   4    1.14    0.37
   5  13  -4    4.65    0.47
   4  13  -4    0.64    0.18
   4  13  -4    0.60    0.23
   4  13  -4    0.42    0.19
  -4 -13   4    0.55    0.32
   3  13  -4   10.24    0.83
   3  13  -4    8.67    0.79
   3  13  -4    8.66    0.72
  -3 -13   4    6.42    1.08
   2  13  -4    5.09    0.55
   2  13  -4    4.59    0.50
   2  13  -4    4.27    0.44
  -2 -13   4    5.71    0.75
   1  13  -4   25.36    2.03
   1  13  -4   24.40    2.26
   1  13  -4   29.98    2.31
   0  13  -4    8.17    0.82
   0  13  -4    8.14    0.74
   0  13  -4   10.44    0.88
   0 -13   4   10.11    1.15
  -1  13  -4    9.79    0.91
  -1  13  -4    8.89    0.78
  -1  13  -4    9.36    0.87
   1 -13   4   10.77    1.21
  -2  13  -4    2.45    0.29
  -2  13  -4    1.78    0.26
  -2  13  -4    2.12    0.32
   2 -13   4    2.34    0.41
  -3  13  -4    7.14    0.73
  -3  13  -4    7.06    0.61
   3 -13   4    6.96    0.93
  -4  13  -4    3.39    0.34
  -4  13  -4    3.85    0.46
   4 -13   4    1.99    0.46
   4 -13   4    2.44    0.32
  -5  13  -4    0.21    0.17
  -5  13  -4   -0.02    0.22
   5 -13   4    0.16    0.28
  -6  13  -4    0.27    0.17
  -6  13  -4    0.17    0.22
   6 -13   4    0.10    0.31
  -7  13  -4    7.59    0.67
  -7  13  -4    7.96    0.79
   7 -13   4    7.77    1.05
  -8  13  -4   -0.03    0.23
  -8  13  -4    0.00    0.18
   8 -13   4   -0.20    0.32
  -9  13  -4   -0.03    0.24
  -9  13  -4   -0.12    0.19
   9 -13   4    0.12    0.36
  10 -13   4    2.65    0.53
  11 -13   4    0.75    0.45
  12 -13   4   -0.17    0.44
  13 -13   4   -0.34    0.46
  14 -13   4   -0.09    0.48
 -12 -12   4    0.06    0.39
 -11 -12   4    0.38    0.38
  10  12  -4    1.00    0.27
 -10 -12   4    0.53    0.37
   9  12  -4    0.72    0.26
  -9 -12   4    0.98    0.38
   8  12  -4    5.66    0.56
  -8 -12   4    4.27    0.74
   7  12  -4    0.78    0.21
   7  12  -4    0.73    0.24
   7  12  -4    0.87    0.27
  -7 -12   4    0.91    0.34
   6  12  -4    0.62    0.22
   6  12  -4    0.82    0.19
   6  12  -4    0.78    0.24
  -6 -12   4    0.46    0.31
   5  12  -4    6.78    0.62
   5  12  -4    6.16    0.53
   5  12  -4    4.50    0.57
  -5 -12   4    5.60    0.82
   4  12  -4    3.17    0.44
   4  12  -4    2.59    0.37
   4  12  -4    3.19    0.34
  -4 -12   4    3.47    0.55
   3  12  -4    6.13    0.57
   3  12  -4    6.29    0.62
   3  12  -4    5.60    0.51
  -3 -12   4    5.19    0.83
   2  12  -4    2.98    0.37
   2  12  -4    2.83    0.32
   2  12  -4    2.50    0.35
  -2 -12   4    3.79    0.51
   1  12  -4    7.68    0.66
   1  12  -4    8.18    0.77
   0  12  -4    3.23    0.47
   0  12  -4    3.77    0.38
   0  12  -4    3.51    0.37
   0 -12   4    3.49    0.63
  -1  12  -4    4.04    0.45
  -1  12  -4    4.12    0.37
  -1  12  -4    3.42    0.37
   1 -12   4    2.70    0.51
  -2  12  -4    1.17    0.18
  -2  12  -4    0.86    0.25
  -2  12  -4    1.34    0.21
   2 -12   4    1.24    0.30
  -3  12  -4   12.59    1.06
  -3  12  -4   12.21    1.21
   3 -12   4   15.69    1.58
  -4  12  -4    3.37    0.38
  -4  12  -4    2.47    0.32
   4 -12   4    2.68    0.32
   4 -12   4    3.37    0.49
  -5  12  -4    0.01    0.20
  -5  12  -4    0.18    0.16
   5 -12   4    0.23    0.26
   5 -12   4    0.17    0.12
  -6  12  -4    6.91    0.55
  -6  12  -4    6.89    0.66
   6 -12   4    4.81    0.87
  -7  12  -4    7.91    0.61
  -7  12  -4    7.17    0.70
   7 -12   4    5.35    0.96
  -8  12  -4    0.87    0.25
  -8  12  -4    1.35    0.22
   8 -12   4    1.23    0.38
  -9  12  -4    2.10    0.26
  -9  12  -4    1.91    0.31
   9 -12   4    1.62    0.45
  10 -12   4    0.24    0.38
  11 -12   4    1.37    0.46
  12 -12   4    0.42    0.45
  13 -12   4    0.22    0.46
  14 -12   4    0.13    0.48
  15 -12   4   -0.18    0.51
 -12 -11   4    0.19    0.38
  11  11  -4    0.38    0.27
 -11 -11   4    0.64    0.37
  10  11  -4   -0.03    0.23
 -10 -11   4    0.23    0.36
   9  11  -4    0.75    0.26
  -9 -11   4    1.07    0.37
   8  11  -4    1.16    0.27
  -8 -11   4    1.30    0.38
   7  11  -4    0.79    0.18
   7  11  -4    0.94    0.24
   7  11  -4    0.57    0.23
   6  11  -4    3.35    0.43
   6  11  -4    2.65    0.37
   6  11  -4    2.88    0.33
  -6 -11   4    2.50    0.48
   5  11  -4    3.26    0.36
   5  11  -4    3.27    0.41
   5  11  -4    3.64    0.47
  -5 -11   4    4.54    0.58
   4  11  -4    2.94    0.41
   4  11  -4    2.71    0.31
   4  11  -4    2.47    0.35
  -4 -11   4    3.66    0.51
   3  11  -4   17.16    1.43
   3  11  -4   19.36    1.62
   3  11  -4   18.92    1.60
   2  11  -4    0.66    0.21
   2  11  -4    0.71    0.16
   2  11  -4    0.54    0.16
  -2 -11   4    0.31    0.26
   1  11  -4    1.92    0.25
   1  11  -4    2.20    0.28
   1  11  -4    1.96    0.29
  -1 -11   4    2.57    0.41
   0  11  -4    4.43    0.39
   0  11  -4    3.19    0.44
   0  11  -4    3.25    0.36
  -1  11  -4   12.00    1.05
  -1  11  -4   11.11    0.92
  -2  11  -4    8.93    0.89
  -2  11  -4    8.59    0.77
  -2  11  -4   10.28    0.84
   2 -11   4   10.27    1.16
  -3  11  -4    6.38    0.64
  -3  11  -4    6.12    0.54
  -4  11  -4    2.68    0.33
  -4  11  -4    3.41    0.38
   4 -11   4    3.21    0.56
   4 -11   4    2.96    0.32
  -5  11  -4    9.12    0.72
   5 -11   4    8.25    0.77
  -6  11  -4    1.10    0.21
  -6  11  -4    0.89    0.25
   6 -11   4    1.80    0.35
  -7  11  -4    6.30    0.65
  -7  11  -4    6.18    0.54
   7 -11   4    5.96    0.86
  -8  11  -4    0.12    0.20
  -8  11  -4    0.42    0.17
   8 -11   4    0.34    0.31
  -9  11  -4    8.30    0.65
  -9  11  -4    8.51    0.75
   9 -11   4    5.94    1.01
  10 -11   4    0.17    0.37
  11 -11   4    2.03    0.50
  12 -11   4   -0.49    0.41
  13 -11   4    0.38    0.44
  14 -11   4   -0.25    0.46
  15 -11   4   -0.37    0.51
  16 -11   4   -0.27    0.54
  11  10  -4   -0.30    0.23
  10  10  -4   -0.02    0.23
 -10 -10   4    0.05    0.32
   9  10  -4    0.12    0.22
  -9 -10   4    0.15    0.31
   8  10  -4    0.03    0.20
  -8 -10   4    0.08    0.29
   7  10  -4    0.57    0.21
   7  10  -4    0.76    0.22
   7  10  -4    0.89    0.17
  -7 -10   4    0.78    0.31
   6  10  -4    1.02    0.21
   6  10  -4    0.47    0.20
   6  10  -4    0.78    0.16
  -6 -10   4    0.55    0.31
   5  10  -4    1.21    0.24
   5  10  -4    1.41    0.25
   5  10  -4    1.71    0.21
  -5 -10   4    1.84    0.36
   4  10  -4    7.53    0.63
   4  10  -4    7.94    0.71
   4  10  -4    7.68    0.73
  -4 -10   4    7.52    0.97
   3  10  -4   18.57    1.51
   3  10  -4   17.75    1.35
   3  10  -4   17.96    1.53
  -3 -10   4   15.24    2.00
   2  10  -4    1.90    0.24
   2  10  -4    2.05    0.26
   2  10  -4    2.10    0.28
  -2 -10   4    2.58    0.39
   1  10  -4   27.85    2.24
   1  10  -4   25.35    2.01
   1  10  -4   25.88    2.27
   0  10  -4    0.17    0.11
   0  10  -4    0.10    0.16
   0  10  -4    0.24    0.12
   0 -10   4    0.19    0.21
  -1  10  -4   20.66    1.90
  -1  10  -4   23.07    1.94
  -1  10  -4   23.78    1.72
  -2  10  -4    0.11    0.09
  -2  10  -4   -0.21    0.15
  -2  10  -4   -0.23    0.11
   2 -10   4    0.02    0.19
  -4  10  -4    1.05    0.17
  -4  10  -4    1.06    0.20
   4 -10   4    0.54    0.24
  -5  10  -4    3.61    0.45
  -6  10  -4    1.14    0.22
  -6  10  -4    1.09    0.25
   6 -10   4    2.05    0.35
   6 -10   4    1.47    0.20
  -7  10  -4    7.45    0.64
  -7  10  -4    7.46    0.74
   7 -10   4    8.02    0.98
  -8  10  -4    4.97    0.48
  -8  10  -4    5.25    0.58
   8 -10   4    6.18    0.79
  -9  10  -4    4.06    0.49
  -9  10  -4    4.30    0.40
   9 -10   4    3.49    0.68
  10 -10   4    0.50    0.39
  11 -10   4    1.39    0.45
  12 -10   4    0.04    0.42
  13 -10   4    0.11    0.44
  14 -10   4   -0.02    0.46
  15 -10   4    0.13    0.51
  16 -10   4   -0.34    0.56
  13   9  -4    0.24    0.57
  12   9  -4    0.10    0.23
  11   9  -4    0.31    0.24
  10   9  -4   -0.02    0.21
   9   9  -4    0.17    0.19
   8   9  -4    4.11    0.46
  -8  -9   4    3.93    0.67
   7   9  -4    6.01    0.61
   7   9  -4    6.06    0.51
   7   9  -4    5.70    0.59
  -7  -9   4    5.65    0.82
   6   9  -4    1.76    0.27
   6   9  -4    2.37    0.27
   6   9  -4    2.29    0.31
   5   9  -4   17.25    1.32
   5   9  -4   16.74    1.49
  -5  -9   4   17.32    1.97
   4   9  -4    0.57    0.14
   4   9  -4    0.43    0.17
   4   9  -4    0.52    0.16
  -4  -9   4    0.71    0.25
   3   9  -4    1.03    0.20
   3   9  -4    1.18    0.18
   3   9  -4    1.68    0.21
  -3  -9   4    1.33    0.30
   2   9  -4    2.33    0.28
   2   9  -4    2.06    0.26
   2   9  -4    2.02    0.26
   1   9  -4   19.17    1.60
   1   9  -4   18.85    1.63
   1   9  -4   18.22    1.44
   0   9  -4    0.37    0.11
   0   9  -4    0.26    0.15
   0   9  -4    0.30    0.12
   0  -9   4    0.45    0.21
  -1   9  -4    5.56    0.55
  -1   9  -4    5.91    0.51
  -1   9  -4    5.20    0.48
   1  -9   4    5.73    0.72
  -2   9  -4    0.23    0.08
  -2   9  -4    0.38    0.15
  -2   9  -4    0.32    0.13
   2  -9   4    0.25    0.19
  -3   9  -4   12.16    1.22
  -3   9  -4   13.90    1.08
   3  -9   4   15.21    1.59
  -4   9  -4    8.12    0.75
  -4   9  -4    8.07    0.65
   4  -9   4    7.30    0.97
   4  -9   4    8.06    0.69
  -5   9  -4    0.23    0.14
  -5   9  -4    0.35    0.16
   5  -9   4    0.36    0.09
   5  -9   4    0.66    0.23
   6  -9   4    1.36    0.19
   6  -9   4    2.04    0.34
  -7   9  -4   17.83    1.30
  -7   9  -4   17.24    1.47
   7  -9   4   17.27    1.44
   7  -9   4   14.55    1.93
  -8   9  -4    0.78    0.18
  -8   9  -4    0.66    0.19
   8  -9   4    0.94    0.32
  -9   9  -4    3.95    0.39
  -9   9  -4    3.98    0.43
   9  -9   4    4.15    0.63
  10  -9   4    0.34    0.37
  11  -9   4    4.06    0.72
  12  -9   4    0.46    0.40
  13  -9   4    0.30    0.42
  14  -9   4   -0.38    0.45
  15  -9   4   -0.05    0.51
  16  -9   4   -0.37    0.59
  14   8  -4    0.66    0.67
  13   8  -4   -0.51    0.61
  13   8  -4    0.13    0.24
  12   8  -4    0.14    0.23
  12   8  -4    0.01    0.57
  11   8  -4    3.95    0.49
  10   8  -4    0.74    0.24
  10   8  -4    1.37    0.49
   9   8  -4    1.21    0.26
   9   8  -4    1.83    0.46
   8   8  -4    2.18    0.32
   7   8  -4    2.12    0.23
   7   8  -4    1.88    0.27
   7   8  -4    2.10    0.29
   6   8  -4    2.83    0.33
   6   8  -4    2.38    0.31
   6   8  -4    3.04    0.28
  -6  -8   4    1.95    0.41
   5   8  -4    9.82    0.84
   5   8  -4   10.97    0.95
   5   8  -4    9.97    0.95
  -5  -8   4   12.10    1.28
   4   8  -4   -0.03    0.12
   4   8  -4   -0.02    0.11
   4   8  -4    0.02    0.10
  -4  -8   4    0.04    0.20
   3   8  -4   15.22    1.39
   3   8  -4   17.76    1.37
   3   8  -4   14.89    1.22
  -3  -8   4   15.75    1.82
   2   8  -4    1.32    0.21
   2   8  -4    1.14    0.18
   2   8  -4    1.28    0.18
  -2  -8   4    1.90    0.30
   1   8  -4    1.71    0.23
   1   8  -4    2.07    0.24
   1   8  -4    2.02    0.22
   0   8  -4    6.14    0.52
   0   8  -4    6.05    0.60
   0   8  -4    6.47    0.56
   0  -8   4    6.55    0.80
  -1   8  -4   17.31    1.47
  -2   8  -4    0.24    0.12
  -2   8  -4    0.34    0.08
   2  -8   4    0.22    0.18
  -3   8  -4   36.35    3.43
  -3   8  -4   35.44    3.04
   3  -8   4   45.27    3.38
   3  -8   4   43.82    4.48
  -4   8  -4    0.90    0.14
  -4   8  -4    0.73    0.15
   4  -8   4    0.54    0.20
   4  -8   4    0.38    0.09
  -5   8  -4   10.65    0.96
   5  -8   4   13.06    1.05
   5  -8   4   13.10    1.44
  -6   8  -4    0.59    0.18
  -6   8  -4    1.03    0.17
   6  -8   4    1.08    0.27
   6  -8   4    1.03    0.14
  -7   8  -4    3.19    0.41
  -7   8  -4    3.16    0.33
   7  -8   4    3.86    0.35
   7  -8   4    2.97    0.49
  -8   8  -4    0.09    0.12
  -8   8  -4   -0.16    0.14
   8  -8   4   -0.17    0.25
  -9   8  -4    4.26    0.40
  -9   8  -4    4.21    0.47
   9  -8   4    4.23    0.71
  10  -8   4   -0.10    0.33
  11  -8   4    1.09    0.42
  12  -8   4    0.39    0.40
  13  -8   4    0.13    0.43
  14  -8   4    0.07    0.48
  15  -8   4    0.34    0.53
  16  -8   4   -0.29    0.60
  15   7  -4    0.49    0.68
  14   7  -4   -0.93    0.60
  13   7  -4    0.55    0.26
  13   7  -4   -0.15    0.57
  12   7  -4   -0.16    0.21
  12   7  -4    0.03    0.54
  11   7  -4    1.62    0.54
  11   7  -4    0.88    0.26
  10   7  -4    0.28    0.46
  10   7  -4    0.32    0.21
   9   7  -4    2.84    0.39
   9   7  -4    3.49    0.60
   8   7  -4    1.00    0.22
   8   7  -4    0.78    0.44
   7   7  -4    3.14    0.30
   7   7  -4    2.64    0.36
   7   7  -4    2.88    0.33
   6   7  -4    5.19    0.53
   6   7  -4    5.00    0.46
   6   7  -4    5.97    0.53
   5   7  -4    1.87    0.24
   5   7  -4    1.89    0.25
   5   7  -4    1.93    0.23
  -5  -7   4    2.28    0.35
   4   7  -4    0.27    0.10
   4   7  -4    0.09    0.12
   4   7  -4    0.19    0.11
  -4  -7   4    0.03    0.19
   3   7  -4   60.99    4.81
   3   7  -4   59.81    4.27
   3   7  -4   49.49    4.76
   2   7  -4   -0.02    0.10
   2   7  -4    0.05    0.09
   2   7  -4    0.02    0.12
   1   7  -4   27.54    2.16
   1   7  -4   30.24    2.40
   1   7  -4   28.01    2.43
  -1  -7   4   27.87    3.18
   0   7  -4    2.61    0.25
   0   7  -4    2.06    0.26
  -1   7  -4   14.09    1.23
  -1   7  -4   14.16    1.09
  -2   7  -4   10.72    1.00
  -2   7  -4   11.90    0.88
  -4   7  -4   15.34    1.34
  -4   7  -4   15.43    1.19
  -5   7  -4   12.83    1.14
  -5   7  -4   12.97    1.01
  -6   7  -4   10.68    0.90
  -6   7  -4   10.77    0.79
   6  -7   4    8.33    1.19
  -7   7  -4   14.06    1.20
  -7   7  -4   13.29    1.06
  -8   7  -4    0.82    0.15
  -8   7  -4    0.77    0.15
   8  -7   4    0.62    0.30
   8  -7   4    0.42    0.13
  -9   7  -4    5.38    0.43
   9  -7   4    3.93    0.76
  10  -7   4    1.93    0.43
  11  -7   4    0.19    0.35
  12  -7   4    0.03    0.39
  13  -7   4    0.87    0.46
  14  -7   4   -0.04    0.49
  15  -7   4    0.26    0.55
  16  -7   4   -0.01    0.60
  17  -7   4    0.31    0.69
  15   6  -4   -0.24    0.64
  14   6  -4   -0.17    0.23
  14   6  -4   -0.18    0.61
  13   6  -4    2.72    0.38
  13   6  -4    1.41    0.64
  12   6  -4    0.09    0.21
  12   6  -4    0.79    0.53
  11   6  -4    0.47    0.48
  11   6  -4    0.69    0.23
  10   6  -4    2.94    0.37
  10   6  -4    2.06    0.57
   9   6  -4    3.40    0.41
   9   6  -4    3.52    0.62
   8   6  -4    1.27    0.42
   8   6  -4    1.40    0.24
   7   6  -4   14.28    1.00
   7   6  -4   12.91    1.13
   7   6  -4   11.25    1.13
   6   6  -4    1.83    0.25
   6   6  -4    2.96    0.28
   6   6  -4    2.73    0.46
   6   6  -4    2.81    0.32
   5   6  -4    9.57    1.00
   5   6  -4   12.38    0.89
   5   6  -4   12.28    1.01
   3   6  -4    8.69    0.78
   3   6  -4    8.77    0.76
   3   6  -4    8.81    0.69
  -3  -6   4    8.22    1.04
   2   6  -4    1.07    0.15
   2   6  -4    1.13    0.14
   2   6  -4    0.99    0.16
   1   6  -4   20.32    1.64
   1   6  -4   19.23    1.67
   1   6  -4   18.61    1.48
   0   6  -4    1.23    0.15
   0   6  -4    1.08    0.14
   0   6  -4    1.11    0.16
   0  -6   4    1.87    0.30
  -1   6  -4   11.86    1.05
  -1   6  -4   11.72    0.93
   1  -6   4   12.52    1.37
  -2   6  -4   13.38    1.21
  -2   6  -4   14.07    1.07
  -2   6  -4   14.65    1.18
   2  -6   4   13.52    1.58
  -3   6  -4    8.15    0.64
  -3   6  -4    6.53    0.73
   3  -6   4    8.84    0.68
  -4   6  -4   -0.08    0.12
  -4   6  -4    0.02    0.10
   4  -6   4    0.06    0.16
   4  -6   4    0.03    0.05
  -5   6  -4    1.90    0.23
  -5   6  -4    2.18    0.21
   5  -6   4    1.57    0.20
   5  -6   4    2.08    0.31
  -7   6  -4   40.62    2.91
  -7   6  -4   36.68    3.28
   7  -6   4   35.49    4.31
   7  -6   4   41.26    3.24
  -8   6  -4    0.47    0.12
  -8   6  -4    0.41    0.14
   8  -6   4    0.54    0.29
   8  -6   4    0.35    0.11
  -9   6  -4    6.37    0.54
   9  -6   4    6.59    0.61
   9  -6   4    6.94    0.92
  10  -6   4    0.77    0.34
  11  -6   4   13.70    1.66
  12  -6   4   -0.14    0.39
  13  -6   4    0.19    0.43
  14  -6   4   -0.07    0.50
  15  -6   4    1.40    0.61
  16  -6   4   -0.68    0.61
  17  -6   4   -0.64    0.69
  16   5  -4   -0.08    0.67
  15   5  -4    0.00    0.61
  14   5  -4   -0.20    0.55
  14   5  -4   -0.08    0.23
  13   5  -4    3.22    0.43
  13   5  -4    2.67    0.66
  12   5  -4   -0.09    0.21
  12   5  -4    0.25    0.48
  11   5  -4    0.94    0.48
  11   5  -4    1.62    0.29
  10   5  -4    0.87    0.44
  10   5  -4    0.25    0.18
   9   5  -4    0.80    0.40
   8   5  -4   -0.14    0.33
   8   5  -4   -0.15    0.14
   7   5  -4    0.11    0.31
   7   5  -4    0.03    0.11
   7   5  -4   -0.11    0.12
   6   5  -4    4.84    0.43
   6   5  -4    5.26    0.49
   6   5  -4    5.63    0.51
   5   5  -4   11.16    1.30
   5   5  -4   10.50    0.97
   5   5  -4   11.57    0.86
   4   5  -4   10.49    0.99
   4   5  -4   12.07    0.88
   3   5  -4   56.52    4.85
   3   5  -4   54.82    4.31
   3   5  -4   57.47    4.81
  -3  -5   4   60.41    6.35
   2   5  -4    2.27    0.25
   2   5  -4    2.53    0.23
   1   5  -4    2.15    0.22
   1   5  -4    2.00    0.26
   1   5  -4    2.13    0.21
  -1  -5   4    2.00    0.35
   0   5  -4    0.66    0.11
   0   5  -4    0.72    0.12
   0   5  -4    0.74    0.09
   0  -5   4    0.85    0.15
  -1   5  -4    0.38    0.10
  -1   5  -4    0.36    0.06
  -1   5  -4    0.54    0.09
   1  -5   4    0.36    0.13
  -2   5  -4    7.09    0.48
  -2   5  -4    4.84    0.55
  -2   5  -4    6.37    0.51
   2  -5   4    5.34    0.71
  -3   5  -4   28.80    2.61
  -3   5  -4   29.12    2.32
   3  -5   4   33.98    3.41
  -4   5  -4    1.43    0.19
  -4   5  -4    1.51    0.16
   4  -5   4    1.07    0.21
  -5   5  -4   23.18    1.81
  -5   5  -4   23.45    2.04
   5  -5   4   24.51    2.68
   5  -5   4   24.13    2.00
  -6   5  -4   12.18    1.06
  -6   5  -4   11.96    0.94
  -7   5  -4   30.70    2.47
  -7   5  -4   30.52    2.20
   7  -5   4   25.44    3.25
  -8   5  -4    0.04    0.11
  -8   5  -4   -0.18    0.13
   8  -5   4    0.30    0.12
   8  -5   4    0.21    0.26
   9  -5   4   21.08    1.80
  10  -5   4    1.98    0.28
  10  -5   4    3.85    0.63
  11  -5   4    6.86    0.98
  12  -5   4    2.57    0.55
  13  -5   4    0.68    0.49
  14  -5   4    0.20    0.52
  15  -5   4    1.34    0.62
  16  -5   4   -0.67    0.64
  17  -5   4   -0.51    0.70
  16   4  -4   -0.28    0.62
  15   4  -4   -0.68    0.58
  15   4  -4    0.62    0.26
  14   4  -4   -0.23    0.22
  14   4  -4   -0.69    0.53
  13   4  -4    0.33    0.50
  13   4  -4    0.34    0.23
  12   4  -4    0.18    0.46
  12   4  -4   -0.24    0.20
  11   4  -4    4.90    0.53
  11   4  -4    4.61    0.80
  10   4  -4    0.31    0.19
  10   4  -4    0.40    0.39
   9   4  -4    1.50    0.25
   9   4  -4    1.75    0.43
   8   4  -4    2.52    0.34
   8   4  -4    2.90    0.48
   7   4  -4   12.84    1.59
   7   4  -4   14.00    1.18
   6   4  -4    1.88    0.26
   6   4  -4    2.59    0.42
   6   4  -4    1.88    0.22
   6   4  -4    2.48    0.29
   5   4  -4   15.78    1.78
   5   4  -4   15.45    1.18
   5   4  -4   15.22    1.33
   4   4  -4    1.62    0.16
   4   4  -4    1.20    0.16
   4   4  -4    1.05    0.17
   3   4  -4   48.70    4.20
   3   4  -4   49.44    3.76
   3   4  -4   51.10    4.24
  -3  -4   4   50.97    5.55
   2   4  -4    6.38    0.55
   2   4  -4    6.49    0.50
   2   4  -4    5.95    0.57
   1   4  -4   15.49    1.14
   1   4  -4   15.19    1.26
   1   4  -4   15.14    1.28
  -1  -4   4   13.62    1.67
   0   4  -4   11.12    0.95
   0   4  -4   10.36    0.92
   0   4  -4   11.20    0.84
  -1   4  -4    2.14    0.21
  -1   4  -4    1.95    0.24
   1  -4   4    2.20    0.31
  -2   4  -4    6.34    0.50
  -2   4  -4    6.61    0.57
   2  -4   4    5.92    0.73
  -3   4  -4    1.32    0.18
  -3   4  -4    1.80    0.19
   3  -4   4    1.99    0.25
  -4   4  -4    1.84    0.21
  -4   4  -4    1.92    0.25
   4  -4   4    1.95    0.33
  -5   4  -4   12.67    0.93
  -5   4  -4   10.74    1.04
   5  -4   4   12.38    1.02
  -6   4  -4    2.05    0.21
  -6   4  -4    2.19    0.24
   6  -4   4    2.75    0.39
  -7   4  -4   17.15    1.53
  -7   4  -4   17.68    1.35
   7  -4   4   14.95    2.03
   7  -4   4   20.74    1.51
  -8   4  -4    4.27    0.32
  -8   4  -4    3.54    0.37
   8  -4   4    3.15    0.55
   8  -4   4    2.65    0.35
   9  -4   4   14.74    1.96
   9  -4   4   19.02    1.46
  10  -4   4    6.10    0.89
  11  -4   4    4.50    0.71
  12  -4   4    1.39    0.50
  13  -4   4    5.69    0.96
  14  -4   4   -0.84    0.53
  15  -4   4    1.01    0.64
  16  -4   4   -0.85    0.66
  17  -4   4   -0.33    0.72
  16   3  -4   -0.08    0.62
  15   3  -4    0.68    0.61
  15   3  -4    1.10    0.31
  14   3  -4    0.17    0.54
  14   3  -4    0.11    0.24
  13   3  -4    1.30    0.31
  13   3  -4    1.17    0.54
  12   3  -4    0.06    0.44
  12   3  -4    0.01    0.20
  11   3  -4    2.89    0.40
  10   3  -4    0.69    0.21
  10   3  -4    0.90    0.39
   9   3  -4    5.63    0.78
   9   3  -4    4.92    0.53
   8   3  -4    3.73    0.40
   8   3  -4    3.25    0.61
   7   3  -4   27.42    2.51
   7   3  -4   31.54    3.31
   6   3  -4   14.97    1.33
   6   3  -4   15.76    1.77
   5   3  -4   29.23    3.24
   5   3  -4   27.95    2.46
   5   3  -4   29.74    2.18
   4   3  -4    0.16    0.16
   4   3  -4   -0.04    0.07
   4   3  -4    0.04    0.08
   4   3  -4   -0.10    0.07
   3   3  -4   11.73    0.90
   3   3  -4   11.66    1.02
   3   3  -4   11.92    1.01
   2   3  -4    0.86    0.12
   2   3  -4    0.89    0.11
   2   3  -4    0.92    0.11
  -2  -3   4    1.27    0.19
   1   3  -4   20.58    1.81
   1   3  -4   20.78    1.83
   1   3  -4   21.31    1.63
  -1  -3   4   23.34    2.39
   0   3  -4    6.26    0.54
   0   3  -4    5.89    0.56
   0   3  -4    6.10    0.50
   0  -3   4    6.99    0.73
  -1   3  -4    0.79    0.10
  -1   3  -4    0.79    0.11
  -2   3  -4   14.98    1.06
   2  -3   4   12.77    1.55
  -3   3  -4    0.13    0.06
  -3   3  -4    0.04    0.07
   3  -3   4    0.36    0.12
  -4   3  -4   18.56    1.50
  -4   3  -4   17.42    1.33
   4  -3   4   16.76    1.47
   4  -3   4   17.38    1.97
  -5   3  -4    3.88    0.30
  -5   3  -4    3.28    0.35
   5  -3   4    3.01    0.29
  -6   3  -4    2.63    0.25
  -6   3  -4    2.30    0.29
   6  -3   4    2.00    0.25
   6  -3   4    2.96    0.37
  -7   3  -4   32.23    2.48
  -7   3  -4   33.84    2.79
   7  -3   4   31.87    2.76
   7  -3   4   33.25    3.67
  -8   3  -4    0.01    0.10
   8  -3   4   -0.08    0.10
   8  -3   4    0.07    0.24
   9  -3   4   13.53    1.16
   9  -3   4   13.22    1.61
  10  -3   4   -0.12    0.12
  10  -3   4   -0.36    0.32
  11  -3   4    0.52    0.40
  12  -3   4    1.81    0.54
  13  -3   4    2.55    0.66
  14  -3   4   -0.89    0.55
  15  -3   4    0.41    0.62
  16  -3   4   -0.72    0.67
  17  -3   4   -0.53    0.70
  16   2  -4    0.08    0.61
  15   2  -4    0.14    0.56
  15   2  -4    0.72    0.28
  14   2  -4   -0.24    0.48
  14   2  -4   -0.14    0.24
  13   2  -4    2.26    0.36
  13   2  -4    1.94    0.57
  12   2  -4    0.43    0.42
  12   2  -4   -0.12    0.20
  11   2  -4    9.72    1.25
  11   2  -4    9.96    0.92
  10   2  -4    0.79    0.36
  10   2  -4    0.55    0.20
   9   2  -4   -0.03    0.14
   9   2  -4    0.65    0.32
   8   2  -4    0.36    0.27
   8   2  -4    0.33    0.14
   7   2  -4   24.22    2.62
   7   2  -4   22.14    1.98
   6   2  -4    8.06    1.00
   6   2  -4    8.46    0.75
   5   2  -4   28.85    2.53
   5   2  -4   30.82    3.33
   4   2  -4    0.57    0.11
   4   2  -4    0.66    0.09
   4   2  -4    0.56    0.09
   3   2  -4    4.32    0.57
   3   2  -4    4.75    0.38
   3   2  -4    5.33    0.43
   3   2  -4    4.63    0.43
   2   2  -4    8.30    0.76
   2   2  -4    9.19    0.76
   2   2  -4    7.80    0.68
  -2  -2   4    9.84    1.00
   1   2  -4   33.91    3.01
   1   2  -4   37.24    2.68
   0   2  -4    0.00    0.04
   0   2  -4    0.03    0.05
  -1   2  -4   73.52    5.55
   1  -2   4   74.34    8.16
   2  -2   4   12.16    1.37
  -3   2  -4    7.72    0.63
   3  -2   4    8.64    0.71
   3  -2   4    7.96    0.93
  -4   2  -4    0.37    0.07
   4  -2   4    0.55    0.08
   4  -2   4    0.68    0.16
   4  -2   4    0.27    0.05
  -5   2  -4    4.32    0.38
   5  -2   4    4.27    0.43
   5  -2   4    4.85    0.59
   5  -2   4    4.67    0.40
   6  -2   4    0.69    0.11
   6  -2   4    0.59    0.23
  -7   2  -4   36.22    2.62
   7  -2   4   33.14    3.89
  -8   2  -4    6.03    0.47
  -8   2  -4    6.08    0.54
   8  -2   4    4.99    0.53
   8  -2   4    5.84    0.82
   9  -2   4   13.23    1.21
   9  -2   4   15.19    1.69
  10  -2   4    7.81    1.04
  10  -2   4    7.27    0.68
  11  -2   4    6.81    0.67
  11  -2   4    7.90    1.08
  12  -2   4    2.77    0.65
  12  -2   4    3.60    0.40
  13  -2   4   -0.31    0.50
  14  -2   4   -0.50    0.57
  15  -2   4    0.57    0.64
  16  -2   4   -0.41    0.66
  17  -2   4   -0.23    0.72
  17   1  -4    0.22    0.64
  16   1  -4    0.39    0.58
  16   1  -4    0.17    0.28
  15   1  -4    1.25    0.31
  15   1  -4    0.90    0.55
  14   1  -4   -0.06    0.47
  14   1  -4   -0.16    0.24
  13   1  -4    0.29    0.25
  13   1  -4    0.76    0.46
  12   1  -4    0.43    0.24
  12   1  -4    1.00    0.42
  11   1  -4   27.03    2.94
  11   1  -4   24.57    2.22
  10   1  -4    0.90    0.23
  10   1  -4    1.50    0.37
   9   1  -4   11.98    1.11
   9   1  -4   13.02    1.48
   8   1  -4    0.60    0.17
   8   1  -4    0.73    0.25
   7   1  -4    9.99    1.17
   7   1  -4    9.59    0.88
   6   1  -4    1.23    0.23
   6   1  -4    0.56    0.14
   5   1  -4   11.68    1.16
   5   1  -4    8.28    0.86
   4   1  -4    0.19    0.06
   4   1  -4    0.26    0.08
   3   1  -4   15.53    1.25
   3   1  -4   13.53    1.64
   3   1  -4   14.92    1.11
   2   1  -4   16.36    1.36
  -2  -1   4   15.74    1.37
   1   1  -4   42.06    3.45
  -1  -1   4   40.32    3.49
   0   1  -4    0.08    0.04
   0  -1   4    0.08    0.05
   0  -1   4    0.06    0.05
  -1   1  -4    3.21    0.27
   1  -1   4    3.12    0.25
   1  -1   4    2.66    0.30
   2  -1   4   14.90    1.27
   2  -1   4   14.95    1.13
   2  -1   4   14.64    1.66
   3  -1   4    1.07    0.12
   3  -1   4    1.57    0.14
   3  -1   4    1.68    0.18
   4  -1   4   19.30    1.68
   4  -1   4   19.05    1.49
   4  -1   4   20.65    1.66
   5  -1   4    4.99    0.52
   5  -1   4    6.26    0.73
   5  -1   4    6.14    0.51
   6  -1   4   -0.06    0.08
   6  -1   4    0.14    0.08
   6  -1   4   -0.04    0.20
   7  -1   4   16.02    1.30
   7  -1   4   13.98    1.29
   7  -1   4   15.31    1.76
   8  -1   4   -0.02    0.10
   8  -1   4   -0.35    0.26
   9  -1   4   18.06    2.00
   9  -1   4   16.09    1.46
  10  -1   4    1.68    0.45
  10  -1   4    1.24    0.20
  11  -1   4   21.73    2.04
  11  -1   4   26.46    2.79
  12  -1   4    0.09    0.48
  12  -1   4    0.32    0.17
  13  -1   4    0.24    0.55
  14  -1   4   -0.44    0.58
  15  -1   4    0.27    0.62
  16  -1   4   -0.05    0.67
  17   0  -4    0.54    0.62
  16   0  -4    0.47    0.57
  16   0  -4    0.00    0.28
  15   0  -4    3.67    0.48
  15   0  -4    2.45    0.59
  14   0  -4    0.34    0.47
  14   0  -4   -0.28    0.25
  13   0  -4    0.91    0.28
  13   0  -4    1.40    0.48
  12   0  -4    0.50    0.39
  12   0  -4   -0.21    0.20
  11   0  -4    5.02    0.73
  11   0  -4    3.99    0.50
  10   0  -4    3.06    0.41
  10   0  -4    3.80    0.63
   9   0  -4   12.65    1.22
   9   0  -4   14.98    1.62
   8   0  -4    1.45    0.30
   8   0  -4    1.27    0.21
   7   0  -4    9.89    1.14
   7   0  -4    9.26    0.86
   6   0  -4    1.07    0.16
   5   0  -4    0.56    0.17
   5   0  -4    0.18    0.09
   4   0  -4    2.81    0.39
   4   0  -4    3.07    0.30
   3   0  -4   16.95    1.47
  -3   0   4   17.69    1.48
  -3   0   4   17.33    1.31
   2   0  -4   -0.01    0.05
  -2   0   4   -0.07    0.05
  -2   0   4   -0.12    0.06
   1   0  -4   38.67    3.07
  -1   0   4   33.76    3.10
  -1   0   4   37.48    2.76
   0   0  -4    1.26    0.13
   0   0   4    1.07    0.15
   0   0   4    1.19    0.13
   1   0   4    1.07    0.12
   1   0   4    0.87    0.11
   2   0   4   14.76    1.16
   2   0   4   15.25    1.28
   2   0   4   15.05    1.30
   2   0   4   15.86    1.70
   3   0   4    1.99    0.19
   3   0   4    2.01    0.18
   3   0   4    1.91    0.21
   3   0   4    1.82    0.30
   4   0   4    1.73    0.28
   4   0   4    1.74    0.19
   4   0   4    1.95    0.22
   4   0   4    1.89    0.18
   5   0   4   28.53    3.08
   5   0   4   26.82    2.08
   5   0   4   27.16    2.34
   6   0   4    7.22    0.65
   7   0   4   28.90    3.09
   7   0   4   27.06    2.34
   7   0   4   27.12    2.07
   7   0   4   26.70    2.32
   8   0   4    0.33    0.31
   8   0   4    0.33    0.12
   8   0   4    0.23    0.11
   9   0   4    6.83    0.99
   9   0   4    7.89    0.69
  10   0   4    1.19    0.47
  10   0   4    1.57    0.23
  11   0   4    4.37    0.81
  11   0   4    4.49    0.48
  12   0   4    0.46    0.18
  12   0   4   -0.24    0.50
  13   0   4   -0.41    0.54
  13   0   4    0.88    0.22
  14   0   4   -0.40    0.57
  15   0   4   -0.50    0.61
  16   0   4   -0.41    0.65
  17  -1  -4   -0.05    0.58
  16  -1  -4   -0.30    0.29
  16  -1  -4   -0.04    0.53
  15  -1  -4    3.80    0.49
  15  -1  -4    2.73    0.63
  14  -1  -4    0.26    0.45
  14  -1  -4    0.36    0.27
  13  -1  -4   11.77    1.02
  13  -1  -4    9.40    1.34
  12  -1  -4    0.61    0.26
  12  -1  -4    0.68    0.40
  11  -1  -4   -0.11    0.33
  11  -1  -4   -0.25    0.19
  10  -1  -4    0.06    0.29
  10  -1  -4    0.05    0.17
   9  -1  -4    7.32    0.70
   8  -1  -4    1.39    0.21
   8  -1  -4    1.54    0.32
   7  -1  -4   17.29    1.96
   7  -1  -4   17.14    1.49
   6  -1  -4    0.80    0.15
   6  -1  -4    1.18    0.22
   5  -1  -4    4.41    0.43
  -5   1   4    4.45    0.41
   4  -1  -4    4.55    0.41
  -4   1   4    4.55    0.40
  -4   1   4    4.10    0.35
   3  -1  -4    4.47    0.39
  -3   1   4    4.23    0.39
  -3   1   4    4.13    0.34
   2  -1  -4    1.08    0.13
  -2   1   4    1.16    0.13
  -2   1   4    1.32    0.12
   1  -1  -4   18.92    1.87
  -1   1   4   25.79    1.89
  -1   1   4   21.96    1.68
   0  -1  -4    0.43    0.06
   0   1   4    0.35    0.07
   0   1   4    0.46    0.08
   1   1   4   47.52    4.06
   1   1   4   48.52    4.02
   1   1   4   48.01    3.61
   2   1   4    7.17    0.63
   2   1   4    7.09    0.56
   2   1   4    7.13    0.61
   2   1   4    7.27    0.82
   3   1   4    0.13    0.15
   3   1   4    0.46    0.08
   3   1   4    0.33    0.07
   3   1   4    0.35    0.07
   4   1   4    0.93    0.24
   4   1   4    0.98    0.13
   4   1   4    1.27    0.15
   5   1   4    3.36    0.49
   5   1   4    2.62    0.34
   5   1   4    3.63    0.29
   6   1   4   15.93    1.43
   6   1   4   17.49    1.28
   6   1   4   17.90    1.44
   6   1   4   15.28    1.92
   7   1   4   38.20    3.33
   7   1   4   39.16    4.39
   7   1   4   37.87    2.96
   7   1   4   41.60    3.31
   8   1   4    1.15    0.18
   8   1   4    1.33    0.39
   8   1   4    1.10    0.16
   8   1   4    1.11    0.15
   9   1   4    4.01    0.42
  10   1   4    3.22    0.65
  10   1   4    3.73    0.40
  11   1   4    0.26    0.45
  11   1   4    0.33    0.17
  12   1   4    0.17    0.52
  12   1   4    1.06    0.22
  13   1   4    0.42    0.21
  13   1   4   -0.58    0.53
  14   1   4    0.04    0.57
  15   1   4   -0.29    0.60
  16   1   4   -0.63    0.63
  17  -2  -4   -0.07    0.56
  16  -2  -4   -0.06    0.26
  16  -2  -4    0.03    0.52
  15  -2  -4    1.77    0.37
  15  -2  -4    1.62    0.56
  14  -2  -4   -0.05    0.26
  14  -2  -4    0.25    0.46
  13  -2  -4   10.11    1.21
  13  -2  -4    8.39    0.90
  12  -2  -4    1.16    0.29
  12  -2  -4    1.23    0.44
  11  -2  -4    6.11    0.82
  11  -2  -4    4.38    0.55
  10  -2  -4    3.06    0.42
  10  -2  -4    4.27    0.66
   8  -2  -4    0.67    0.16
   8  -2  -4    0.58    0.26
   7  -2  -4    0.17    0.14
   7  -2  -4    1.00    0.24
   6  -2  -4    9.15    1.11
  -6   2   4    9.69    0.82
   5  -2  -4   29.49    2.82
   5  -2  -4   21.06    2.15
   4  -2  -4    2.63    0.25
  -4   2   4    2.05    0.24
  -4   2   4    2.12    0.21
   3  -2  -4   12.11    1.15
  -3   2   4   13.78    1.15
  -3   2   4   14.36    1.02
   2  -2  -4    0.19    0.06
  -2   2   4    0.18    0.06
  -2   2   4    0.16    0.06
   1  -2  -4   12.47    1.18
  -1   2   4   14.72    1.20
  -1   2   4   14.74    1.06
   0  -2  -4   12.67    1.00
   0   2   4   11.29    0.90
   0   2   4   11.12    1.01
   1   2   4    0.08    0.06
   1   2   4    0.10    0.05
   1   2   4    0.13    0.06
   2   2   4    5.99    0.59
   2   2   4    7.02    0.57
   2   2   4    6.76    0.52
   2   2   4    6.50    0.77
   3   2   4   41.68    3.45
   3   2   4   40.51    4.56
   3   2   4   41.51    3.10
   3   2   4   40.83    3.49
   4   2   4    0.56    0.09
   4   2   4    0.24    0.09
   4   2   4    0.62    0.24
   4   2   4    0.58    0.11
   5   2   4    0.95    0.28
   5   2   4    0.77    0.12
   5   2   4    0.72    0.13
   5   2   4    0.78    0.12
   6   2   4    4.30    0.62
   6   2   4    4.30    0.41
   7   2   4   10.80    1.41
   7   2   4   11.75    0.89
   7   2   4   11.77    1.01
   7   2   4   11.33    1.00
   8   2   4    1.22    0.17
   8   2   4    1.63    0.21
   8   2   4    1.09    0.18
   8   2   4    1.50    0.41
   9   2   4    4.68    0.48
   9   2   4    4.86    0.74
  10   2   4   -0.65    0.41
  10   2   4    0.16    0.16
  11   2   4    5.28    0.56
  11   2   4    5.88    1.00
  12   2   4    0.50    0.21
  12   2   4   -0.26    0.50
  13   2   4   -0.22    0.53
  13   2   4    0.29    0.21
  14   2   4   -0.75    0.55
  14   2   4    0.27    0.23
  15   2   4   -0.59    0.58
  16   2   4   -0.83    0.63
  17  -3  -4    0.42    0.57
  16  -3  -4    0.00    0.28
  16  -3  -4    0.28    0.52
  15  -3  -4    1.75    0.57
  14  -3  -4    0.48    0.47
  14  -3  -4   -0.12    0.27
  13  -3  -4    1.01    0.47
  13  -3  -4    1.40    0.33
  12  -3  -4    0.61    0.40
  12  -3  -4   -0.07    0.22
  11  -3  -4   33.72    3.81
  10  -3  -4    0.45    0.19
  10  -3  -4    0.59    0.33
   9  -3  -4    2.57    0.41
   9  -3  -4    1.92    0.29
   8  -3  -4    0.04    0.25
   8  -3  -4    0.34    0.14
   7  -3  -4    4.63    0.49
  -7   3   4    5.05    0.46
   6  -3  -4   13.63    1.59
   6  -3  -4   14.81    1.22
  -6   3   4   14.12    1.20
  -6   3   4   13.40    1.07
   5  -3  -4   20.84    2.51
   5  -3  -4   21.92    1.92
  -5   3   4   24.84    1.92
   4  -3  -4    0.54    0.12
  -4   3   4    0.93    0.12
  -4   3   4    0.79    0.10
   3  -3  -4   47.58    4.26
  -3   3   4   51.40    3.81
  -3   3   4   53.11    4.29
   2  -3  -4   14.63    1.10
  -2   3   4   11.56    1.10
  -2   3   4   12.32    0.98
   1  -3  -4    1.88    0.20
  -1   3   4    1.94    0.22
  -1   3   4    1.89    0.19
   0   3   4    1.12    0.12
   0   3   4    1.23    0.15
   2   3   4   13.96    1.21
   2   3   4   17.42    1.78
   2   3   4   15.23    1.36
   2   3   4   16.83    1.35
   3   3   4   49.59    4.46
   3   3   4   53.56    5.83
   3   3   4   51.81    3.96
   3   3   4   55.67    4.42
   4   3   4   12.75    1.46
   4   3   4   12.88    1.08
   4   3   4   11.91    1.10
   4   3   4   12.81    0.97
   5   3   4   14.98    1.29
   6   3   4    0.06    0.09
   6   3   4    0.26    0.12
   6   3   4   -0.17    0.27
   6   3   4   -0.04    0.10
   7   3   4    4.25    0.58
   7   3   4    3.49    0.38
   7   3   4    3.87    0.41
   7   3   4    3.42    0.34
   8   3   4    0.93    0.17
   8   3   4    0.56    0.16
   8   3   4    0.36    0.36
   8   3   4    0.88    0.14
   9   3   4    2.58    0.57
   9   3   4    3.68    0.38
  10   3   4    0.04    0.41
  10   3   4    0.09    0.16
  11   3   4    1.14    0.51
  11   3   4    1.39    0.25
  12   3   4    0.15    0.20
  12   3   4   -0.69    0.49
  13   3   4    0.05    0.54
  13   3   4    0.81    0.24
  14   3   4    0.06    0.22
  14   3   4   -0.72    0.55
  15   3   4   -0.52    0.60
  16  -4  -4   -0.20    0.28
  15  -4  -4    1.71    0.57
  14  -4  -4    0.05    0.28
  14  -4  -4   -0.37    0.46
  13  -4  -4    0.25    0.44
  13  -4  -4    0.36    0.27
  12  -4  -4    0.57    0.41
  12  -4  -4    0.99    0.27
  11  -4  -4   12.11    1.16
  11  -4  -4   13.24    1.55
  10  -4  -4   -0.03    0.18
  10  -4  -4   -0.28    0.31
   9  -4  -4    5.13    0.54
   8  -4  -4    3.92    0.40
   8  -4  -4    2.85    0.56
   7  -4  -4   10.09    1.10
   7  -4  -4    7.97    0.84
  -7   4   4    9.57    0.82
   6  -4  -4    2.08    0.30
   6  -4  -4    2.24    0.28
  -6   4   4    1.93    0.21
  -6   4   4    2.25    0.26
   5  -4  -4   12.11    1.15
   5  -4  -4   11.51    1.50
  -5   4   4   14.70    1.15
  -5   4   4   14.91    1.02
   4  -4  -4   13.97    1.09
  -4   4   4   12.07    0.96
  -4   4   4   11.67    1.08
  -3   4   4   66.44    5.59
  -3   4   4   65.73    4.97
   2  -4  -4    3.08    0.27
  -2   4   4    2.25    0.28
  -2   4   4    2.32    0.24
   1  -4  -4   14.64    1.19
  -1   4   4   14.23    1.21
  -1   4   4   13.21    1.07
   0   4   4    1.16    0.16
   0   4   4    1.40    0.15
   0   4   4    1.29    0.16
   1   4   4    9.42    0.84
   1   4   4   10.59    0.76
   1   4   4    8.60    1.11
   1   4   4   10.35    0.86
   2   4   4   10.55    1.21
   2   4   4   11.39    0.91
   2   4   4    9.90    0.82
   2   4   4   10.14    0.92
   3   4   4    0.04    0.21
   3   4   4   -0.05    0.10
   3   4   4    0.02    0.08
   3   4   4   -0.07    0.07
   4   4   4    0.24    0.10
   4   4   4    0.42    0.24
   4   4   4    0.26    0.12
   4   4   4    0.44    0.10
   5   4   4    7.34    0.96
   5   4   4    7.80    0.70
   6   4   4    3.47    0.62
   6   4   4    2.98    0.36
   6   4   4    3.87    0.33
   6   4   4    3.87    0.39
   7   4   4   17.76    2.05
   7   4   4   17.27    1.35
   7   4   4   17.10    1.51
   7   4   4   18.17    1.53
   8   4   4    2.68    0.34
   8   4   4    1.73    0.21
   8   4   4    1.37    0.45
   8   4   4    1.57    0.24
   9   4   4    4.92    0.68
   9   4   4    3.30    0.42
  10   4   4    1.47    0.25
  10   4   4    0.95    0.49
  11   4   4    0.54    0.49
  11   4   4    0.67    0.20
  12   4   4    0.10    0.51
  12   4   4    0.06    0.19
  13   4   4    1.34    0.27
  13   4   4    0.66    0.58
  14   4   4   -0.08    0.20
  14   4   4   -0.55    0.58
  15   4   4   -0.02    0.22
  15   4   4   -0.24    0.65
  16  -5  -4   -0.54    0.31
  15  -5  -4    2.54    0.45
  14  -5  -4    0.14    0.29
  13  -5  -4    2.33    0.40
  12  -5  -4    0.78    0.28
  12  -5  -4    0.51    0.41
  11  -5  -4    2.36    0.47
  11  -5  -4    2.14    0.36
  10  -5  -4    0.10    0.20
  10  -5  -4    0.36    0.31
   9  -5  -4    0.24    0.18
   9  -5  -4    0.70    0.28
   8  -5  -4    2.69    0.41
   8  -5  -4    2.24    0.31
   6  -5  -4    3.82    0.40
   6  -5  -4    4.00    0.54
  -6   5   4    4.06    0.34
  -6   5   4    3.72    0.39
   5  -5  -4   11.01    0.95
   5  -5  -4   10.83    1.23
  -5   5   4   10.36    0.94
  -5   5   4   10.82    0.84
  -4   5   4    2.71    0.32
  -4   5   4    3.05    0.28
   3  -5  -4    7.70    0.80
  -3   5   4    9.68    0.81
  -3   5   4   10.01    0.72
   2  -5  -4    4.83    0.40
  -2   5   4    4.10    0.36
  -2   5   4    3.76    0.41
   1  -5  -4   21.45    2.10
  -1   5   4   27.10    2.12
  -1   5   4   26.01    1.88
   0   5   4    5.23    0.55
   0   5   4    5.86    0.48
   0   5   4    6.50    0.53
   1   5   4   22.00    1.64
   1   5   4   21.06    1.84
   1   5   4   21.42    1.82
   2   5   4    0.16    0.09
   2   5   4    0.19    0.09
   2   5   4    0.44    0.22
   2   5   4    0.13    0.11
   3   5   4   10.93    1.20
   3   5   4   10.09    0.88
   3   5   4    9.31    0.90
   4   5   4    7.64    0.75
   4   5   4    8.06    0.73
   4   5   4    8.09    0.66
   4   5   4    9.18    1.02
   5   5   4    2.26    0.26
   5   5   4    2.30    0.27
   5   5   4    2.27    0.31
   6   5   4    0.26    0.12
   6   5   4    0.46    0.15
   6   5   4    0.71    0.32
   6   5   4    0.33    0.13
   7   5   4    8.77    0.72
   7   5   4    8.79    0.81
   7   5   4    8.94    1.17
   7   5   4    9.28    0.83
   8   5   4    0.91    0.21
   8   5   4    0.91    0.17
   8   5   4    0.70    0.19
   8   5   4    0.81    0.42
   9   5   4    6.95    1.02
   9   5   4    7.18    0.68
  10   5   4    0.43    0.19
  10   5   4    0.36    0.46
  11   5   4    1.16    0.24
  11   5   4    0.76    0.53
  12   5   4    0.57    0.57
  12   5   4    1.14    0.26
  13   5   4    0.10    0.57
  13   5   4    0.38    0.22
  14   5   4    0.18    0.22
  14   5   4   -0.10    0.64
  16  -6  -4   -0.01    0.33
  15  -6  -4    0.57    0.34
  14  -6  -4    0.12    0.28
  13  -6  -4    1.91    0.38
  12  -6  -4    0.28    0.26
  11  -6  -4    5.71    0.63
  10  -6  -4    0.31    0.22
   9  -6  -4    2.55    0.34
   8  -6  -4   -0.15    0.21
   8  -6  -4   -0.17    0.15
  -8   6   4    0.00    0.12
   7  -6  -4    0.14    0.14
  -7   6   4    0.12    0.12
  -7   6   4    0.28    0.10
   6  -6  -4    2.70    0.33
   6  -6  -4    3.47    0.45
  -6   6   4    2.69    0.27
   5  -6  -4   11.41    1.48
  -5   6   4   13.41    1.15
  -5   6   4   14.96    1.02
   4  -6  -4    0.58    0.13
   4  -6  -4    0.58    0.13
  -4   6   4    0.47    0.11
  -4   6   4    0.67    0.13
   3  -6  -4   51.78    4.03
  -3   6   4   46.33    4.06
  -3   6   4   45.47    3.60
   2  -6  -4    9.46    0.72
  -2   6   4    7.23    0.73
  -2   6   4    7.70    0.65
   1  -6  -4    1.42    0.20
   1  -6  -4    1.74    0.21
  -1   6   4    1.44    0.17
  -1   6   4    1.39    0.20
   0   6   4    7.09    0.61
   0   6   4    6.63    0.55
   1   6   4    0.53    0.12
   1   6   4    0.33    0.10
   1   6   4    0.07    0.09
   2   6   4    0.71    0.13
   2   6   4    0.57    0.13
   2   6   4    0.58    0.15
   3   6   4   13.69    0.94
   3   6   4   12.56    1.04
   3   6   4   10.62    1.05
   3   6   4   10.86    1.39
   4   6   4    1.32    0.19
   4   6   4    1.11    0.17
   4   6   4    0.98    0.33
   4   6   4    1.00    0.19
   5   6   4   19.78    1.54
   5   6   4   20.20    1.72
   5   6   4   20.06    1.74
   5   6   4   19.97    2.29
   6   6   4    0.00    0.13
   6   6   4    0.07    0.12
   6   6   4    0.87    0.36
   6   6   4    0.20    0.16
   7   6   4    5.24    0.93
   7   6   4    7.84    0.67
   7   6   4    6.65    0.63
   7   6   4    6.73    0.57
   8   6   4    0.16    0.15
   8   6   4    0.05    0.19
   8   6   4   -0.03    0.15
   8   6   4    0.06    0.42
   9   6   4    1.93    0.55
   9   6   4    2.11    0.30
  10   6   4    0.38    0.51
  10   6   4    0.14    0.18
  11   6   4    0.64    0.56
  11   6   4    1.18    0.25
  12   6   4   -0.76    0.56
  12   6   4    0.11    0.20
  13   6   4   -0.58    0.61
  13   6   4   -0.10    0.21
  14   6   4   -0.13    0.68
  16  -7  -4   -0.14    0.29
  15  -7  -4    1.07    0.35
  14  -7  -4   -0.04    0.30
  13  -7  -4    0.23    0.30
  12  -7  -4    0.67    0.30
  11  -7  -4    1.56    0.31
  10  -7  -4    1.06    0.28
   9  -7  -4    4.74    0.53
   8  -7  -4    1.43    0.25
  -8   7   4    1.52    0.18
  -8   7   4    1.42    0.20
   7  -7  -4   17.28    1.57
  -7   7   4   18.96    1.57
   6  -7  -4    4.89    0.49
  -6   7   4    5.07    0.42
  -6   7   4    4.84    0.49
  -5   7   4    2.06    0.23
  -5   7   4    2.08    0.28
   4  -7  -4    0.21    0.11
  -4   7   4    0.05    0.10
  -4   7   4    0.13    0.13
   3  -7  -4   13.97    1.41
  -3   7   4   17.55    1.27
  -3   7   4   17.95    1.43
   2  -7  -4    1.62    0.23
   2  -7  -4    2.03    0.30
  -2   7   4    2.31    0.22
  -2   7   4    1.94    0.25
   1  -7  -4   15.43    1.27
   1  -7  -4   15.09    1.66
  -1   7   4   13.82    1.14
  -1   7   4   14.61    1.29
   0  -7  -4    0.14    0.14
   0   7   4    0.22    0.10
   0   7   4    0.53    0.12
   0   7   4    0.25    0.13
   1   7   4   11.50    0.90
   1   7   4   10.57    1.00
   1   7   4   12.59    1.03
  -2  -7  -4   -0.13    0.15
   2   7   4    0.07    0.12
   2   7   4   -0.02    0.10
   2   7   4    0.01    0.10
   3   7   4    0.00    0.14
   3   7   4    0.22    0.11
   3   7   4    0.16    0.12
   4   7   4    2.68    0.30
   4   7   4    3.70    0.57
   4   7   4    3.09    0.38
   4   7   4    2.33    0.32
   5   7   4   12.46    0.93
   5   7   4   11.82    1.04
   5   7   4   12.15    1.06
   5   7   4   10.05    1.39
   6   7   4    4.57    0.42
   6   7   4    3.20    0.45
   6   7   4    5.35    0.51
   6   7   4    6.45    0.80
   7   7   4    7.73    0.72
   7   7   4    7.23    0.61
   7   7   4    6.39    0.98
   7   7   4    6.90    0.67
   8   7   4    0.40    0.46
   8   7   4    1.19    0.23
   8   7   4    0.95    0.25
   8   7   4    1.11    0.21
   9   7   4    0.26    0.18
   9   7   4   -0.24    0.47
  10   7   4   -0.37    0.52
  10   7   4    0.48    0.20
  11   7   4   -0.68    0.54
  11   7   4    0.02    0.19
  12   7   4   -0.77    0.57
  12   7   4   -0.02    0.20
  13   7   4    0.09    0.22
  13   7   4   -0.20    0.65
  16  -8  -4   -0.01    0.35
  15  -8  -4    0.38    0.36
  14  -8  -4   -0.31    0.31
  13  -8  -4    4.41    0.60
  12  -8  -4    0.28    0.29
  11  -8  -4    1.62    0.34
  10  -8  -4    0.82    0.26
   9  -8  -4    0.11    0.19
   8  -8  -4    1.30    0.24
  -8   8   4    0.90    0.15
  -8   8   4    0.93    0.20
   7  -8  -4    3.17    0.39
  -7   8   4    3.47    0.40
   6  -8  -4    2.15    0.31
  -6   8   4    2.49    0.34
  -6   8   4    2.39    0.27
  -5   8   4   14.12    1.24
  -5   8   4   14.13    1.10
   4  -8  -4    0.03    0.12
  -4   8   4    0.18    0.12
  -4   8   4   -0.11    0.14
  -3   8   4    1.07    0.19
  -3   8   4    0.97    0.16
   2  -8  -4    0.64    0.13
  -2   8   4    0.69    0.17
  -2   8   4    0.88    0.14
   1  -8  -4   21.68    1.91
  -1   8   4   22.34    1.71
  -1   8   4   23.25    1.94
   0  -8  -4   -0.10    0.14
   0   8   4    0.14    0.11
   0   8   4    0.05    0.12
   0   8   4    0.02    0.14
  -1  -8  -4    9.41    1.10
   1   8   4   10.36    0.85
   1   8   4    9.37    0.87
   1   8   4    8.90    0.76
   2   8   4   10.51    0.90
   2   8   4    9.60    0.80
   2   8   4   10.16    0.91
  -3  -8  -4    8.91    1.03
   3   8   4    9.34    0.70
   3   8   4    8.24    0.80
   3   8   4    7.84    0.77
   4   8   4    2.24    0.32
   4   8   4    2.75    0.30
   4   8   4    3.34    0.40
   5   8   4    0.19    0.18
   5   8   4    0.05    0.14
   5   8   4    0.13    0.15
   5   8   4    0.61    0.38
   6   8   4    0.53    0.21
   6   8   4    0.50    0.18
   6   8   4    0.34    0.17
   6   8   4    0.39    0.42
   7   8   4    7.34    0.62
   7   8   4    8.31    0.75
   7   8   4    5.83    1.03
   8   8   4    0.40    0.19
   8   8   4   -0.13    0.22
   8   8   4    0.15    0.49
   8   8   4    0.07    0.17
   9   8   4    0.03    0.18
   9   8   4   -0.38    0.51
  10   8   4   -0.22    0.55
  10   8   4    0.35    0.20
  11   8   4   -0.46    0.59
  11   8   4    0.42    0.21
  12   8   4   -0.08    0.21
  12   8   4   -0.69    0.63
  15  -9  -4    0.14    0.36
  14  -9  -4    0.03    0.32
  13  -9  -4    3.14    0.48
  12  -9  -4    0.90    0.32
  11  -9  -4    1.94    0.37
  10  -9  -4   -0.06    0.23
   9  -9  -4    0.85    0.25
   8  -9  -4    1.61    0.30
  -8   9   4    3.26    0.37
  -8   9   4    2.36    0.28
   7  -9  -4    1.99    0.33
  -7   9   4    3.55    0.31
  -7   9   4    2.84    0.39
   6  -9  -4    2.37    0.33
  -6   9   4    2.25    0.31
  -6   9   4    2.40    0.27
  -5   9   4   22.12    1.67
  -5   9   4   21.32    1.89
  -4   9   4    1.23    0.22
  -4   9   4    0.92    0.17
   3  -9  -4   15.11    1.40
  -3   9   4   16.13    1.26
  -3   9   4   17.62    1.43
   2  -9  -4    0.02    0.11
  -2   9   4    0.05    0.17
  -2   9   4    0.51    0.14
   1  -9  -4    1.02    0.17
  -1   9   4    1.16    0.20
  -1   9   4    0.70    0.16
   0   9   4    4.37    0.49
   0   9   4    4.81    0.42
   1   9   4    2.68    0.32
   1   9   4    2.24    0.28
   1   9   4    2.24    0.29
   2   9   4    0.52    0.15
   2   9   4    0.50    0.19
   2   9   4    0.59    0.15
  -3  -9  -4    8.64    1.09
   3   9   4    8.33    0.85
   3   9   4   10.65    0.74
   3   9   4    8.55    0.82
  -4  -9  -4    2.85    0.42
   4   9   4    2.26    0.33
   4   9   4    3.05    0.41
   4   9   4    2.70    0.31
   5   9   4    1.06    0.24
   5   9   4    1.09    0.19
   5   9   4    1.31    0.23
   6   9   4    1.05    0.23
   6   9   4    1.13    0.21
   6   9   4    1.16    0.26
   6   9   4    1.69    0.39
   7   9   4    6.42    0.63
   7   9   4    7.36    0.74
   7   9   4    7.09    0.68
   8   9   4    0.35    0.51
   8   9   4    0.08    0.19
   8   9   4   -0.16    0.24
   8   9   4   -0.05    0.18
   9   9   4    3.24    0.40
   9   9   4    1.80    0.65
  10   9   4    0.07    0.20
  10   9   4   -0.16    0.58
  11   9   4    0.41    0.23
  11   9   4   -0.09    0.62
  15 -10  -4    0.35    0.38
  14 -10  -4    0.44    0.36
  13 -10  -4    0.95    0.36
  12 -10  -4    0.45    0.31
  11 -10  -4    5.93    0.67
  10 -10  -4    1.71    0.34
   9 -10  -4    2.67    0.38
   8 -10  -4    4.48    0.55
  -8  10   4    5.32    0.48
  -8  10   4    6.31    0.58
   7 -10  -4    1.41    0.26
  -7  10   4    1.74    0.27
   6 -10  -4    0.40    0.19
  -6  10   4    0.51    0.21
  -6  10   4    0.50    0.17
  -5  10   4    1.09    0.19
  -5  10   4    1.30    0.24
   4 -10  -4    0.76    0.18
  -4  10   4    1.04    0.19
  -4  10   4    0.73    0.23
   3 -10  -4   17.17    1.44
  -3  10   4   15.78    1.29
  -3  10   4   16.68    1.47
   2 -10  -4    0.31    0.14
  -2  10   4    0.19    0.16
  -2  10   4    0.03    0.19
   1 -10  -4    6.46    0.55
  -1  10   4    5.29    0.60
  -1  10   4    5.05    0.50
   0  10   4    4.11    0.39
   0  10   4    3.52    0.47
   0  10   4    3.75    0.41
   1  10   4    0.21    0.15
   1  10   4    0.31    0.15
   2  10   4    1.16    0.23
   2  10   4    0.65    0.18
   2  10   4    0.96    0.17
   3  10   4    5.21    0.45
   3  10   4    4.75    0.55
   3  10   4    4.84    0.50
   4  10   4    2.65    0.33
   4  10   4    3.45    0.44
   4  10   4    2.82    0.35
   5  10   4    6.98    0.62
   6  10   4   -0.11    0.17
   6  10   4    0.04    0.23
   6  10   4    0.16    0.18
   7  10   4    2.16    0.30
   7  10   4    1.74    0.28
   7  10   4    1.74    0.33
   8  10   4   -0.24    0.26
   8  10   4   -0.03    0.20
   9  10   4    3.18    0.39
   9  10   4    0.64    0.57
  10  10   4    0.15    0.22
  10  10   4    0.59    0.55
  11  10   4    0.21    0.65
  14 -11  -4    0.34    0.37
  13 -11  -4    0.33    0.34
  12 -11  -4    0.13    0.31
  11 -11  -4    0.28    0.30
  10 -11  -4    0.08    0.26
   9 -11  -4    0.32    0.23
   8 -11  -4    0.04    0.21
  -8  11   4   -0.03    0.17
  -8  11   4   -0.22    0.21
   7 -11  -4    2.27    0.34
  -7  11   4    2.48    0.36
  -7  11   4    2.60    0.31
   6 -11  -4    2.56    0.33
  -6  11   4    1.58    0.26
  -6  11   4    2.21    0.32
  -5  11   4    3.75    0.51
  -5  11   4    4.22    0.43
   4 -11  -4    1.06    0.22
  -4  11   4    1.46    0.24
  -4  11   4    1.37    0.28
   3 -11  -4    4.85    0.55
  -3  11   4    6.56    0.64
  -3  11   4    5.84    0.52
   2 -11  -4    0.29    0.16
  -2  11   4    0.55    0.22
  -2  11   4    0.51    0.17
   1 -11  -4   22.91    1.90
  -1  11   4   22.91    1.94
  -1  11   4   20.53    1.71
   0  11   4    8.77    0.85
   0  11   4    9.30    0.78
   0  11   4   10.06    0.90
   1  11   4    5.07    0.51
   1  11   4    4.79    0.47
   1  11   4    5.50    0.59
   2  11   4    9.13    0.90
   2  11   4    9.45    0.82
   2  11   4   11.61    0.95
   3  11   4    0.50    0.17
   3  11   4    0.45    0.19
   3  11   4    0.47    0.22
   4  11   4    0.05    0.16
   4  11   4    0.00    0.16
   4  11   4    0.03    0.21
   5  11   4    1.09    0.26
   5  11   4    0.96    0.22
   6  11   4   -0.02    0.20
   6  11   4    0.31    0.19
   6  11   4    0.50    0.25
   7  11   4    1.22    0.25
   7  11   4    1.26    0.31
   7  11   4    1.49    0.26
   8  11   4    0.33    0.29
   8  11   4    0.38    0.21
   9  11   4    0.42    0.23
  13 -12  -4    0.34    0.34
  12 -12  -4    0.23    0.32
  11 -12  -4    0.23    0.28
  10 -12  -4    0.36    0.26
   9 -12  -4   -0.11    0.22
   8 -12  -4    1.46    0.29
  -8  12   4    1.31    0.24
  -8  12   4    1.06    0.29
   7 -12  -4   10.98    0.93
  -7  12   4   10.06    0.98
  -7  12   4    9.00    0.83
   6 -12  -4    0.48    0.21
  -6  12   4    0.70    0.25
  -6  12   4    0.44    0.20
   5 -12  -4    7.28    0.70
  -5  12   4    7.28    0.76
  -5  12   4    7.07    0.64
   4 -12  -4    0.38    0.18
  -4  12   4    0.56    0.20
  -4  12   4    0.57    0.25
   3 -12  -4    8.29    0.76
  -3  12   4    7.56    0.70
  -3  12   4    8.61    0.83
   2 -12  -4    0.03    0.16
  -2  12   4    0.27    0.23
  -2  12   4    0.79    0.19
   1 -12  -4    3.87    0.45
  -1  12   4    4.21    0.43
  -1  12   4    5.13    0.54
   0  12   4    1.47    0.29
   0  12   4    1.09    0.23
   1  12   4    1.98    0.28
   1  12   4    1.64    0.25
   1  12   4    1.78    0.31
   2  12   4    1.31    0.23
   2  12   4    1.11    0.26
   2  12   4    1.20    0.22
   3  12   4    2.96    0.33
   3  12   4    1.57    0.30
   3  12   4    1.56    0.28
   4  12   4    0.13    0.23
   4  12   4    0.02    0.17
   4  12   4    0.24    0.19
   5  12   4    0.11    0.18
   5  12   4   -0.10    0.24
   5  12   4    0.23    0.19
   6  12   4    0.26    0.21
   6  12   4    0.15    0.19
   6  12   4    0.45    0.27
   7  12   4    1.63    0.27
  13 -13  -4    0.34    0.35
  12 -13  -4   -0.21    0.32
  11 -13  -4    0.85    0.32
  10 -13  -4    0.29    0.27
   9 -13  -4    3.63    0.49
   8 -13  -4    5.21    0.59
  -8  13   4    5.97    0.65
  -8  13   4    4.91    0.52
   7 -13  -4    0.37    0.23
  -7  13   4    0.55    0.27
  -7  13   4    0.34    0.20
   6 -13  -4    3.17    0.41
  -6  13   4    2.70    0.44
  -6  13   4    3.33    0.37
   5 -13  -4    6.11    0.59
  -5  13   4    5.18    0.54
  -5  13   4    5.74    0.67
   4 -13  -4    3.02    0.38
  -4  13   4    2.68    0.35
  -4  13   4    2.94    0.42
   3 -13  -4    2.38    0.34
  -3  13   4    3.52    0.43
  -3  13   4    2.80    0.34
   2 -13  -4    0.03    0.16
  -2  13   4   -0.12    0.18
  -2  13   4    0.31    0.24
   1 -13  -4    0.32    0.19
  -1  13   4    0.42    0.20
  -1  13   4    0.57    0.25
   0  13   4    0.90    0.27
   0  13   4    0.88    0.21
   1  13   4    1.13    0.24
   1  13   4    0.82    0.21
   1  13   4    0.96    0.27
   2  13   4    1.01    0.27
   2  13   4    0.95    0.23
   2  13   4    0.49    0.20
   3  13   4    1.62    0.32
   3  13   4    2.47    0.32
   3  13   4    1.88    0.27
   4  13   4    0.05    0.18
   4  13   4    0.15    0.19
   4  13   4    0.00    0.24
   5  13   4    0.70    0.22
   5  13   4    0.15    0.27
   5  13   4    0.59    0.22
   6  13   4    0.31    0.22
   6  13   4    0.17    0.28
   6  13   4    0.02    0.19
   7  13   4    0.24    0.30
   7  13   4   -0.04    0.22
  11 -14  -4    0.09    0.30
  10 -14  -4    1.67    0.36
   9 -14  -4    0.22    0.25
   8 -14  -4    0.31    0.24
  -8  14   4    0.36    0.29
  -8  14   4    0.43    0.22
   7 -14  -4    2.17    0.36
  -7  14   4    2.58    0.34
  -7  14   4    1.96    0.40
   6 -14  -4    1.41    0.28
  -6  14   4    1.11    0.26
  -6  14   4    1.08    0.32
   5 -14  -4    2.18    0.35
  -5  14   4    3.10    0.35
  -5  14   4    2.53    0.42
   4 -14  -4    1.88    0.30
  -4  14   4    1.98    0.38
  -4  14   4    2.05    0.31
   3 -14  -4    1.39    0.27
  -3  14   4    2.49    0.37
  -3  14   4    1.60    0.27
   2 -14  -4    0.36    0.19
  -2  14   4    0.23    0.20
  -2  14   4    0.16    0.26
   1 -14  -4    3.67    0.43
  -1  14   4    3.24    0.40
  -1  14   4    4.03    0.53
   0  14   4    0.32    0.20
   0  14   4    0.19    0.26
   1  14   4    0.81    0.22
   1  14   4    0.57    0.22
   1  14   4    0.72    0.27
   2  14   4    0.07    0.18
   2  14   4    0.21    0.19
   2  14   4    0.03    0.25
   3  14   4   -0.04    0.18
   3  14   4   -0.02    0.19
   3  14   4    0.01    0.25
   4  14   4   -0.14    0.19
   4  14   4    0.02    0.19
   4  14   4   -0.04    0.26
   5  14   4    0.51    0.23
   5  14   4    0.35    0.29
   6  14   4   -0.18    0.28
   7  14   4    0.02    0.31
  10 -15  -4    0.60    0.32
   9 -15  -4    0.73    0.30
   8 -15  -4    1.06    0.29
  -8  15   4    0.84    0.32
  -8  15   4    0.92    0.25
   7 -15  -4    2.85    0.41
  -7  15   4    2.27    0.43
  -7  15   4    3.17    0.38
   6 -15  -4    0.13    0.23
  -6  15   4    0.05    0.22
  -6  15   4    0.21    0.29
   5 -15  -4    1.29    0.27
  -5  15   4    0.87    0.26
  -5  15   4    1.46    0.36
   4 -15  -4    0.62    0.22
  -4  15   4    0.40    0.23
  -4  15   4    0.65    0.31
   3 -15  -4    0.13    0.20
  -3  15   4    0.11    0.21
  -3  15   4   -0.29    0.30
   2 -15  -4    0.13    0.19
  -2  15   4    0.11    0.21
  -2  15   4   -0.17    0.27
   1 -15  -4    0.01    0.19
  -1  15   4   -0.08    0.20
  -1  15   4   -0.24    0.26
   0 -15  -4    0.05    0.19
   0  15   4   -0.23    0.19
   0  15   4   -0.23    0.26
   1  15   4    0.28    0.27
   1  15   4    0.21    0.20
   2  15   4   -0.16    0.20
   2  15   4   -0.01    0.19
   2  15   4   -0.12    0.25
   3  15   4   -0.01    0.26
   4  15   4   -0.30    0.28
   5  15   4   -0.07    0.29
  -8  16   4    1.87    0.32
  -8  16   4    1.80    0.39
   7 -16  -4   -0.08    0.25
  -7  16   4    0.10    0.24
  -7  16   4    0.06    0.30
   6 -16  -4    0.25    0.24
  -6  16   4    0.24    0.24
  -6  16   4    0.22    0.31
   5 -16  -4    0.57    0.25
  -5  16   4    0.43    0.32
  -5  16   4    0.69    0.25
   4 -16  -4    0.08    0.21
  -4  16   4    0.08    0.23
  -4  16   4    0.00    0.30
   3 -16  -4   -0.20    0.20
  -3  16   4   -0.40    0.32
   2 -16  -4    0.46    0.22
  -2  16   4   -0.21    0.30
  -1  16   4   -0.09    0.29
   0  16   4    0.08    0.28
   1  16   4    0.49    0.29
   2  16   4    0.20    0.28
   3  16   4    0.35    0.30
  -7  17   4    0.02    0.32
  -6  17   4   -0.20    0.32
  -5  17   4    0.03    0.31
  -4  17   4   -0.24    0.30
  -3  17   4    0.89    0.35
  -2  17   4   -0.18    0.32
  -1  17   4    0.20    0.31
   0  17   4   -0.13    0.29
  -2  20  -5    0.53    0.35
  -3  20  -5    0.24    0.36
  -4  20  -5    0.23    0.36
   2  19  -5    0.28    0.32
  -2 -19   5    0.03    0.37
   1  19  -5    0.07    0.31
  -1 -19   5    0.34    0.37
   0  19  -5   -0.10    0.28
   0 -19   5   -0.10    0.35
  -1  19  -5    0.34    0.30
   1 -19   5   -0.17    0.36
  -2  19  -5    0.47    0.33
   2 -19   5    0.26    0.35
  -3  19  -5    0.26    0.34
   3 -19   5    0.29    0.38
  -4  19  -5    0.14    0.35
   4 -19   5    0.51    0.41
  -5  19  -5    0.03    0.34
   5 -19   5    0.44    0.41
  -6  19  -5    0.13    0.34
   6 -19   5    0.45    0.44
  -7  19  -5    0.12    0.34
   7 -19   5    0.14    0.45
  -8  19  -5   -0.24    0.33
   8 -19   5    0.03    0.45
   4  18  -5    0.17    0.32
  -4 -18   5   -0.22    0.35
   3  18  -5    0.40    0.30
   3  18  -5    0.46    0.22
  -3 -18   5   -0.05    0.37
   2  18  -5    0.11    0.29
  -2 -18   5    0.24    0.35
   1  18  -5   -0.07    0.27
  -1 -18   5   -0.25    0.33
   0  18  -5    0.33    0.28
   0 -18   5    0.09    0.34
  -1  18  -5    0.00    0.21
  -1  18  -5   -0.08    0.28
   1 -18   5   -0.08    0.35
  -2  18  -5   -0.07    0.30
  -2  18  -5    0.00    0.21
   2 -18   5   -0.13    0.33
  -3  18  -5    0.47    0.23
  -3  18  -5    0.60    0.33
   3 -18   5    0.23    0.35
  -4  18  -5    0.57    0.34
  -4  18  -5    0.37    0.24
   4 -18   5    1.02    0.42
  -5  18  -5    0.39    0.33
  -5  18  -5    0.09    0.22
   5 -18   5    0.18    0.37
  -6  18  -5    1.72    0.31
  -6  18  -5    1.43    0.39
   6 -18   5    2.24    0.53
  -7  18  -5   -0.02    0.32
  -7  18  -5    0.11    0.23
   7 -18   5    0.20    0.42
  -8  18  -5    0.59    0.24
  -8  18  -5    0.41    0.34
   8 -18   5    0.79    0.46
  -9  18  -5    0.01    0.23
  -9  18  -5   -0.37    0.32
   9 -18   5    0.21    0.46
  10 -18   5    0.20    0.48
   6  17  -5    0.53    0.34
  -6 -17   5    0.55    0.39
   5  17  -5    0.07    0.30
  -5 -17   5    0.05    0.35
   4  17  -5    0.26    0.29
   4  17  -5    0.13    0.23
   4  17  -5    0.37    0.21
  -4 -17   5    0.42    0.36
   3  17  -5    0.11    0.27
   3  17  -5    0.30    0.21
   3  17  -5    0.23    0.20
  -3 -17   5   -0.05    0.33
   2  17  -5    0.06    0.20
   2  17  -5    0.10    0.26
   2  17  -5    0.50    0.20
  -2 -17   5   -0.07    0.34
   1  17  -5   -0.02    0.20
   1  17  -5   -0.07    0.25
  -1 -17   5   -0.11    0.32
   0  17  -5    1.36    0.32
   0  17  -5    0.89    0.24
   0 -17   5    1.06    0.39
  -1  17  -5    0.19    0.21
  -1  17  -5    0.34    0.29
   1 -17   5    0.48    0.34
  -2  17  -5    1.14    0.25
  -2  17  -5    0.97    0.33
   2 -17   5    1.34    0.40
  -3  17  -5   -0.03    0.20
  -3  17  -5    0.16    0.31
   3 -17   5    0.45    0.35
  -4  17  -5   -0.04    0.20
  -4  17  -5   -0.23    0.30
   4 -17   5    0.09    0.35
  -5  17  -5    0.70    0.32
  -5  17  -5    0.60    0.23
   5 -17   5    0.66    0.39
  -6  17  -5    2.02    0.40
  -6  17  -5    1.74    0.32
   6 -17   5    3.30    0.57
  -7  17  -5    0.00    0.21
  -7  17  -5    0.42    0.32
   7 -17   5    0.45    0.40
  -8  17  -5    2.88    0.46
  -8  17  -5    2.69    0.37
   8 -17   5    3.53    0.65
  -9  17  -5    0.04    0.21
  -9  17  -5    0.32    0.32
   9 -17   5    0.47    0.45
  10 -17   5    0.40    0.47
  11 -17   5    0.14    0.49
  -7 -16   5   -0.03    0.36
   6  16  -5    0.05    0.22
   6  16  -5    0.27    0.31
  -6 -16   5    0.32    0.35
   5  16  -5    0.06    0.20
   5  16  -5    0.37    0.28
   5  16  -5   -0.02    0.20
  -5 -16   5   -0.28    0.33
   4  16  -5    1.83    0.27
   4  16  -5    1.30    0.26
   4  16  -5    1.27    0.30
  -4 -16   5    1.39    0.42
   3  16  -5    0.02    0.18
   3  16  -5    0.13    0.20
   3  16  -5    0.10    0.24
  -3 -16   5    0.06    0.32
   2  16  -5    0.46    0.19
   2  16  -5    0.56    0.21
   2  16  -5    0.65    0.26
  -2 -16   5    0.39    0.34
   1  16  -5   -0.01    0.17
   1  16  -5   -0.23    0.24
   1  16  -5    0.02    0.19
  -1 -16   5   -0.17    0.31
   0  16  -5    0.81    0.22
   0  16  -5    0.93    0.30
   0  16  -5    0.86    0.23
   0 -16   5    1.32    0.38
  -1  16  -5    0.52    0.27
  -1  16  -5    0.15    0.18
   1 -16   5    0.25    0.30
  -2  16  -5    1.20    0.25
  -2  16  -5    1.10    0.33
   2 -16   5    1.90    0.43
  -3  16  -5   -0.20    0.18
  -3  16  -5   -0.13    0.28
   3 -16   5   -0.17    0.30
  -4  16  -5    1.65    0.37
  -4  16  -5    1.38    0.28
   4 -16   5    2.59    0.49
  -5  16  -5    0.90    0.31
  -5  16  -5    0.97    0.23
   5 -16   5    0.12    0.33
  -6  16  -5    0.86    0.25
  -6  16  -5    0.58    0.32
   6 -16   5    1.19    0.43
  -7  16  -5    0.26    0.21
  -7  16  -5    0.17    0.30
   7 -16   5    0.25    0.38
  -8  16  -5    2.00    0.40
  -8  16  -5    2.18    0.33
   8 -16   5    3.12    0.59
  -9  16  -5    0.07    0.30
  -9  16  -5    0.03    0.21
   9 -16   5    0.28    0.42
  10 -16   5    0.44    0.45
  11 -16   5    0.21    0.47
  12 -16   5    0.39    0.52
  -9 -15   5   -0.12    0.37
  -8 -15   5   -0.13    0.36
   7  15  -5    0.42    0.23
  -7 -15   5    0.08    0.36
   6  15  -5    0.26    0.25
   6  15  -5    0.42    0.22
   6  15  -5    0.17    0.21
  -6 -15   5    0.19    0.34
   5  15  -5    0.31    0.20
   5  15  -5    0.64    0.20
   5  15  -5    0.93    0.26
  -5 -15   5    0.23    0.33
   4  15  -5    0.17    0.19
   4  15  -5    0.06    0.18
   4  15  -5    0.08    0.24
  -4 -15   5   -0.21    0.31
   3  15  -5    0.09    0.23
   3  15  -5   -0.10    0.18
   3  15  -5   -0.13    0.17
  -3 -15   5   -0.12    0.30
   2  15  -5    1.45    0.26
   2  15  -5    1.73    0.26
   2  15  -5    1.21    0.30
  -2 -15   5    1.69    0.42
   1  15  -5   -0.22    0.24
   1  15  -5    0.10    0.16
   1  15  -5   -0.16    0.17
  -1 -15   5    0.25    0.31
   0  15  -5    0.17    0.26
   0  15  -5    0.36    0.19
   0  15  -5    0.24    0.16
   0 -15   5    0.19    0.30
  -1  15  -5   -0.06    0.15
  -1  15  -5   -0.18    0.18
  -1  15  -5   -0.22    0.26
   1 -15   5    0.02    0.29
  -2  15  -5    1.84    0.29
  -2  15  -5    1.52    0.34
   2 -15   5    2.57    0.46
  -3  15  -5    0.92    0.30
  -3  15  -5    0.82    0.22
   3 -15   5    1.09    0.35
  -4  15  -5    9.79    0.98
  -4  15  -5    8.97    0.83
   4 -15   5   11.55    1.28
  -5  15  -5    0.03    0.27
  -5  15  -5    0.22    0.20
   5 -15   5    0.23    0.32
  -6  15  -5    0.16    0.27
  -6  15  -5    0.58    0.21
   6 -15   5    0.34    0.33
  -7  15  -5   -0.67    0.27
  -7  15  -5   -0.37    0.19
   7 -15   5   -0.01    0.36
  -8  15  -5   -0.36    0.27
  -8  15  -5   -0.31    0.19
   8 -15   5    0.21    0.36
  -9  15  -5    0.06    0.21
  -9  15  -5   -0.37    0.28
   9 -15   5    0.39    0.41
  10 -15   5    0.41    0.43
  11 -15   5    0.08    0.45
  12 -15   5    0.26    0.49
  13 -15   5   -0.17    0.51
 -10 -14   5    0.03    0.35
  -9 -14   5    0.19    0.34
   8  14  -5    0.95    0.29
  -8 -14   5    1.43    0.43
   7  14  -5    0.19    0.21
  -7 -14   5    0.03    0.34
   6  14  -5    0.40    0.20
   6  14  -5    0.29    0.21
   6  14  -5    0.17    0.25
  -6 -14   5   -0.20    0.32
   5  14  -5    5.57    0.60
   5  14  -5    4.85    0.52
   4  14  -5    0.56    0.19
   4  14  -5    0.80    0.25
   4  14  -5    0.88    0.21
  -4 -14   5    0.45    0.32
   3  14  -5    0.94    0.24
   3  14  -5    0.69    0.18
   3  14  -5    0.27    0.18
  -3 -14   5    0.36    0.31
   2  14  -5    5.85    0.60
   2  14  -5    5.17    0.49
   2  14  -5    5.07    0.53
  -2 -14   5    5.20    0.79
   1  14  -5    2.63    0.33
   1  14  -5    2.41    0.35
   1  14  -5    2.86    0.39
  -1 -14   5    3.73    0.63
   0  14  -5   17.28    1.44
   0  14  -5   15.10    1.25
   0  14  -5   15.46    1.38
  -1  14  -5    6.16    0.53
  -1  14  -5    5.70    0.64
   1 -14   5    4.73    0.80
  -2  14  -5    1.08    0.26
  -2  14  -5    0.61    0.19
   2 -14   5    0.55    0.30
  -3  14  -5    1.73    0.33
  -3  14  -5    1.97    0.28
   3 -14   5    2.23    0.42
  -4  14  -5    5.07    0.56
  -4  14  -5    4.01    0.44
  -5  14  -5    0.17    0.25
  -5  14  -5    0.17    0.17
   5 -14   5    0.08    0.31
  -6  14  -5    2.49    0.39
  -6  14  -5    2.22    0.32
   6 -14   5    3.36    0.55
  -7  14  -5    1.01    0.23
  -7  14  -5    1.14    0.30
   7 -14   5    1.55    0.45
  -8  14  -5    0.10    0.27
  -8  14  -5    0.32    0.20
   8 -14   5    0.87    0.37
  -9  14  -5   -0.57    0.24
  -9  14  -5   -0.09    0.18
   9 -14   5    0.15    0.38
  10 -14   5    0.05    0.41
  11 -14   5    0.18    0.44
  12 -14   5   -0.13    0.46
  13 -14   5    0.29    0.51
  14 -14   5    0.10    0.53
 -11 -13   5   -0.02    0.37
 -10 -13   5   -0.13    0.34
   9  13  -5    0.95    0.27
  -9 -13   5    0.55    0.35
   8  13  -5    0.81    0.26
  -8 -13   5    0.80    0.37
   7  13  -5    0.44    0.26
   7  13  -5    0.74    0.23
  -7 -13   5    0.37    0.32
   6  13  -5    2.19    0.38
   6  13  -5    2.90    0.35
   6  13  -5    3.07    0.39
  -6 -13   5    3.58    0.55
   5  13  -5    1.20    0.25
   5  13  -5    0.33    0.21
   5  13  -5    1.04    0.20
  -5 -13   5    0.79    0.34
   4  13  -5    5.43    0.53
   4  13  -5    6.80    0.62
  -4 -13   5    4.80    0.82
   3  13  -5    1.33    0.25
   3  13  -5    0.78    0.18
   3  13  -5    0.10    0.17
  -3 -13   5    0.11    0.30
   2  13  -5    1.62    0.27
   2  13  -5    1.91    0.31
   2  13  -5    2.53    0.28
  -2 -13   5    1.79    0.43
   1  13  -5    0.75    0.24
   1  13  -5    0.73    0.18
  -1 -13   5    0.64    0.31
   0  13  -5   18.23    1.60
   0  13  -5   20.31    1.65
   0  13  -5   18.45    1.44
   0 -13   5   17.18    2.14
  -1  13  -5    5.72    0.61
  -1  13  -5    6.83    0.52
   1 -13   5    4.29    0.79
  -2  13  -5    7.56    0.74
  -2  13  -5    9.52    0.70
  -2  13  -5    9.57    0.81
   2 -13   5    6.53    1.05
  -3  13  -5    0.41    0.17
  -3  13  -5    0.38    0.23
   3 -13   5    0.25    0.27
  -4  13  -5    0.71    0.26
  -4  13  -5    0.48    0.19
   4 -13   5    0.46    0.31
  -5  13  -5    6.77    0.61
  -5  13  -5    7.08    0.73
  -6  13  -5    3.63    0.40
  -6  13  -5    2.64    0.42
   6 -13   5    4.45    0.67
  -7  13  -5    0.71    0.20
  -7  13  -5    0.64    0.26
   7 -13   5    0.60    0.36
  -8  13  -5    2.91    0.35
  -8  13  -5    2.86    0.41
   8 -13   5    3.12    0.55
  -9  13  -5   -0.36    0.17
  -9  13  -5   -0.30    0.24
   9 -13   5    0.29    0.37
  10 -13   5    0.67    0.42
  11 -13   5    0.89    0.47
  12 -13   5   -0.13    0.44
  13 -13   5    0.07    0.49
  14 -13   5   -0.27    0.49
 -12 -12   5    0.44    0.40
 -11 -12   5    0.13    0.38
  10  12  -5    0.36    0.27
 -10 -12   5    0.81    0.38
   9  12  -5    0.23    0.24
  -9 -12   5    0.00    0.33
   8  12  -5   -0.26    0.21
  -8 -12   5    0.10    0.31
   7  12  -5    1.30    0.27
   7  12  -5    0.95    0.21
   7  12  -5    1.43    0.25
  -7 -12   5    0.69    0.33
   6  12  -5    0.08    0.19
   6  12  -5   -0.26    0.22
   6  12  -5    0.01    0.17
  -6 -12   5    0.24    0.31
   5  12  -5    0.86    0.22
   5  12  -5    1.32    0.20
   5  12  -5    1.69    0.27
  -5 -12   5    0.63    0.34
   4  12  -5    1.53    0.25
   4  12  -5    1.82    0.27
   4  12  -5    1.86    0.30
  -4 -12   5    2.08    0.43
   2  12  -5   11.52    0.93
   2  12  -5   11.68    1.06
   2  12  -5   11.49    1.03
   1  12  -5    1.35    0.25
   1  12  -5    1.11    0.21
   1  12  -5    1.20    0.20
  -1 -12   5    1.23    0.34
   0  12  -5    5.57    0.53
   0  12  -5    5.33    0.50
   0  12  -5    6.12    0.60
   0 -12   5    5.37    0.81
   1 -12   5    1.07    0.30
  -2  12  -5   42.87    2.92
  -2  12  -5   34.22    3.23
  -3  12  -5    2.01    0.28
   3 -12   5    1.17    0.31
  -4  12  -5    6.07    0.68
  -4  12  -5    6.34    0.57
   4 -12   5    6.65    0.89
  -5  12  -5    5.59    0.47
  -5  12  -5    5.24    0.56
   5 -12   5    3.71    0.73
  -6  12  -5    8.03    0.82
  -6  12  -5    8.15    0.71
   6 -12   5    8.86    1.09
  -7  12  -5    0.31    0.17
  -7  12  -5    0.19    0.22
   7 -12   5   -0.11    0.30
  -8  12  -5    1.46    0.27
  -8  12  -5    0.86    0.20
   8 -12   5    1.28    0.40
  -9  12  -5   -0.06    0.19
  -9  12  -5   -0.24    0.23
   9 -12   5    0.34    0.36
  10 -12   5    1.51    0.46
  11 -12   5    0.32    0.42
  12 -12   5   -0.26    0.44
  13 -12   5   -0.03    0.47
  14 -12   5    0.07    0.48
  15 -12   5    0.10    0.52
 -12 -11   5    0.41    0.39
  11  11  -5   -0.02    0.25
 -11 -11   5    0.19    0.38
  10  11  -5    0.41    0.26
 -10 -11   5    0.47    0.37
   9  11  -5    0.44    0.22
  -9 -11   5    0.07    0.31
   8  11  -5   -0.09    0.21
  -8 -11   5   -0.06    0.31
   7  11  -5    0.48    0.23
   7  11  -5    0.22    0.17
   7  11  -5    0.58    0.22
  -7 -11   5    0.44    0.30
   6  11  -5    0.58    0.24
   6  11  -5    1.17    0.24
   6  11  -5    1.00    0.20
  -6 -11   5    0.93    0.32
   5  11  -5    0.79    0.21
   5  11  -5    1.34    0.25
   5  11  -5    1.26    0.19
  -5 -11   5    0.71    0.34
   4  11  -5    6.05    0.60
   4  11  -5    5.56    0.54
   4  11  -5    6.17    0.64
  -4 -11   5    7.60    0.89
   3  11  -5    0.02    0.15
   3  11  -5    0.28    0.19
   3  11  -5    0.41    0.15
  -3 -11   5    0.22    0.26
   2  11  -5   44.27    3.44
   2  11  -5   49.13    3.84
   2  11  -5   46.30    3.88
  -2 -11   5   42.25    5.07
   1  11  -5    1.07    0.24
   1  11  -5    0.91    0.18
   1  11  -5    0.86    0.17
  -1 -11   5    1.23    0.30
   0  11  -5   20.15    1.71
   0  11  -5   20.18    1.75
   0  11  -5   19.78    1.55
  -1  11  -5    2.88    0.43
  -1  11  -5    3.48    0.35
  -1  11  -5    2.97    0.36
   1 -11   5    4.22    0.58
  -2  11  -5    5.16    0.45
  -2  11  -5    4.39    0.53
  -3  11  -5    1.07    0.19
  -3  11  -5    1.37    0.25
   3 -11   5    1.30    0.28
  -4  11  -5    7.65    0.62
  -4  11  -5    6.50    0.71
   4 -11   5    7.36    0.94
  -5  11  -5    1.11    0.20
  -5  11  -5    0.95    0.24
   5 -11   5    0.51    0.26
  -6  11  -5    2.75    0.39
  -6  11  -5    3.15    0.35
   6 -11   5    3.38    0.51
  -7  11  -5    6.43    0.58
  -7  11  -5    6.55    0.67
  -8  11  -5    4.75    0.54
  -8  11  -5    4.57    0.44
   8 -11   5    4.26    0.72
  -9  11  -5   -0.14    0.21
  -9  11  -5   -0.24    0.17
   9 -11   5    0.14    0.34
  10 -11   5    0.72    0.41
  11 -11   5    0.57    0.43
  12 -11   5    0.93    0.47
  13 -11   5    0.45    0.48
  14 -11   5   -0.32    0.47
  15 -11   5   -0.29    0.53
 -12 -10   5    0.09    0.37
  11  10  -5    0.04    0.24
 -11 -10   5    0.17    0.36
  10  10  -5    0.01    0.21
 -10 -10   5   -0.07    0.32
   9  10  -5    0.14    0.21
  -9 -10   5    0.28    0.33
   8  10  -5    0.49    0.22
  -8 -10   5    0.27    0.30
   7  10  -5    4.72    0.50
   7  10  -5    4.42    0.52
   7  10  -5    4.14    0.42
   6  10  -5   13.07    1.15
   6  10  -5   12.00    1.14
   6  10  -5   12.38    1.01
  -6 -10   5   13.51    1.52
   5  10  -5    1.20    0.23
   5  10  -5    1.31    0.24
   5  10  -5    1.63    0.21
  -5 -10   5    1.07    0.33
   4  10  -5   10.61    0.90
   4  10  -5    8.86    0.87
   4  10  -5   10.17    0.78
  -4 -10   5    8.79    1.18
   3  10  -5    3.51    0.43
   3  10  -5    3.87    0.34
   3  10  -5    2.39    0.36
  -3 -10   5    3.73    0.54
   2  10  -5    7.53    0.65
   2  10  -5    6.41    0.59
   2  10  -5    6.90    0.69
  -2 -10   5    7.35    0.92
   1  10  -5    0.13    0.13
   1  10  -5    0.13    0.11
   1  10  -5    0.15    0.17
  -1 -10   5    0.23    0.23
   0  10  -5   21.68    1.65
   0  10  -5   23.41    1.83
   0  10  -5   23.00    1.87
   0 -10   5   17.88    2.43
  -1  10  -5    0.38    0.15
  -1  10  -5    0.34    0.19
  -1  10  -5    0.66    0.12
   1 -10   5    0.74    0.24
  -2  10  -5    4.72    0.57
  -2  10  -5    6.14    0.51
  -2  10  -5    5.15    0.49
   2 -10   5    6.08    0.75
  -3  10  -5    4.03    0.37
  -3  10  -5    4.29    0.44
   3 -10   5    2.69    0.54
  -4  10  -5    0.32    0.15
  -4  10  -5    0.19    0.17
   4 -10   5    0.18    0.09
  -5  10  -5    7.82    0.71
  -5  10  -5    7.76    0.61
   5 -10   5    5.73    0.91
  -6  10  -5    1.97    0.31
  -6  10  -5    2.35    0.30
   6 -10   5    2.79    0.42
  -7  10  -5    0.61    0.22
  -7  10  -5    0.85    0.21
   7 -10   5    1.23    0.32
  -8  10  -5    9.38    0.86
  -8  10  -5    8.99    0.73
   8 -10   5    8.32    1.13
  -9  10  -5    0.75    0.19
  -9  10  -5    0.50    0.22
   9 -10   5    0.94    0.37
  10 -10   5    0.41    0.39
  11 -10   5    0.03    0.40
  12 -10   5    0.93    0.46
  13 -10   5    0.21    0.44
  14 -10   5    0.03    0.49
  15 -10   5   -0.20    0.52
  16 -10   5   -0.29    0.56
  12   9  -5    0.10    0.24
  11   9  -5    0.08    0.24
  10   9  -5    1.86    0.32
   9   9  -5    0.37    0.22
  -9  -9   5    0.41    0.31
   8   9  -5    0.60    0.22
  -8  -9   5    0.98    0.32
   7   9  -5    0.44    0.20
   7   9  -5    0.64    0.16
   7   9  -5    0.85    0.21
  -7  -9   5    0.46    0.30
   6   9  -5    2.97    0.33
   6   9  -5    2.81    0.37
   6   9  -5    3.33    0.42
  -6  -9   5    3.95    0.58
   5   9  -5    2.70    0.33
   5   9  -5    2.29    0.34
   5   9  -5    3.04    0.29
  -5  -9   5    3.04    0.46
   4   9  -5    8.07    0.66
   4   9  -5    6.27    0.68
   4   9  -5    6.61    0.59
  -4  -9   5    7.45    0.92
   3   9  -5    0.34    0.13
   3   9  -5    0.23    0.15
   3   9  -5    0.06    0.12
  -3  -9   5    0.18    0.23
   2   9  -5   15.69    1.35
   2   9  -5   16.15    1.38
   2   9  -5   15.31    1.22
   1   9  -5    1.10    0.17
   1   9  -5    0.89    0.17
   1   9  -5    1.15    0.21
  -1  -9   5    1.29    0.27
   0   9  -5    2.45    0.29
   0   9  -5    3.11    0.37
   0   9  -5    2.59    0.29
   0  -9   5    3.21    0.50
  -1   9  -5    0.80    0.19
  -1   9  -5    0.66    0.15
  -1   9  -5    0.89    0.13
   1  -9   5    1.28    0.24
  -2   9  -5   37.30    2.56
  -2   9  -5   35.41    2.88
  -2   9  -5   28.61    2.82
  -3   9  -5    0.14    0.16
  -3   9  -5    0.20    0.14
   3  -9   5    0.16    0.19
  -4   9  -5   17.93    1.43
  -4   9  -5   19.31    1.63
  -5   9  -5   12.48    1.01
  -5   9  -5   14.06    1.15
   5  -9   5   11.89    1.50
  -6   9  -5    3.30    0.35
  -7   9  -5   -0.07    0.14
  -7   9  -5   -0.13    0.16
   7  -9   5    0.08    0.25
  -8   9  -5   -0.23    0.16
  -8   9  -5   -0.09    0.15
   8  -9   5    0.33    0.29
  -9   9  -5    0.13    0.18
  -9   9  -5    0.24    0.16
   9  -9   5    0.26    0.33
  10  -9   5    2.64    0.54
  11  -9   5   -0.20    0.38
  12  -9   5    1.77    0.50
  13  -9   5    0.05    0.43
  14  -9   5   -0.36    0.47
  15  -9   5   -0.38    0.53
  16  -9   5   -0.41    0.59
  14   8  -5   -0.31    0.56
  13   8  -5    0.16    0.25
  13   8  -5    0.06    0.54
  12   8  -5   -0.48    0.49
  12   8  -5    0.13    0.23
  11   8  -5   -0.06    0.46
  11   8  -5    0.42    0.23
  10   8  -5    0.77    0.25
   8   8  -5    1.91    0.30
   7   8  -5    1.43    0.23
   7   8  -5    0.96    0.17
   7   8  -5    1.32    0.22
  -7  -8   5    0.78    0.29
   6   8  -5    2.85    0.32
   6   8  -5    3.19    0.40
   6   8  -5    3.57    0.38
   5   8  -5   14.63    1.27
   5   8  -5   13.56    1.12
   5   8  -5   15.06    1.26
   4   8  -5   11.88    1.04
   4   8  -5   11.68    1.03
   4   8  -5   10.97    0.92
  -4  -8   5   12.49    1.37
   3   8  -5    1.34    0.18
   3   8  -5    1.09    0.19
   3   8  -5    0.94    0.16
  -3  -8   5    1.15    0.28
   2   8  -5   15.91    1.41
   2   8  -5   15.62    1.25
   2   8  -5   17.39    1.39
  -2  -8   5   15.64    1.85
   1   8  -5    1.48    0.19
   1   8  -5    1.06    0.21
   1   8  -5    1.38    0.18
   0   8  -5   35.94    2.99
   0   8  -5   38.91    2.95
   0   8  -5   35.10    2.65
   0  -8   5   29.96    3.90
  -1   8  -5    5.53    0.58
  -1   8  -5    6.36    0.53
  -1   8  -5    5.59    0.50
   1  -8   5    6.04    0.76
  -2   8  -5   20.99    1.83
  -2   8  -5   21.37    1.62
  -3   8  -5    5.45    0.55
  -3   8  -5    6.09    0.47
   3  -8   5    4.51    0.69
  -4   8  -5   12.41    1.01
  -4   8  -5   11.93    1.15
   4  -8   5   13.60    1.51
   4  -8   5   13.76    1.10
  -5   8  -5    1.53    0.19
  -5   8  -5    1.26    0.20
   5  -8   5    0.66    0.26
  -7   8  -5    0.97    0.18
  -7   8  -5    0.97    0.16
  -8   8  -5    2.07    0.27
  -8   8  -5    1.98    0.25
   8  -8   5    2.95    0.45
  -9   8  -5    0.21    0.17
  -9   8  -5    0.29    0.14
   9  -8   5    0.50    0.34
  10  -8   5    6.83    0.97
  11  -8   5    0.19    0.39
  12  -8   5    1.85    0.48
  13  -8   5   -0.19    0.42
  14  -8   5   -0.14    0.48
  15  -8   5   -0.22    0.54
  16  -8   5   -0.50    0.59
  15   7  -5    0.36    0.66
  14   7  -5   -0.11    0.60
  13   7  -5    0.11    0.56
  13   7  -5    0.13    0.25
  12   7  -5    0.15    0.52
  12   7  -5    0.30    0.24
  11   7  -5    0.51    0.24
  11   7  -5    0.73    0.50
  10   7  -5    0.89    0.25
  10   7  -5    0.65    0.48
   9   7  -5    0.21    0.39
   9   7  -5    0.26    0.19
   8   7  -5    9.09    0.84
   7   7  -5    2.33    0.28
   7   7  -5    1.48    0.22
   7   7  -5    1.33    0.19
   6   7  -5    3.36    0.33
   6   7  -5    3.44    0.38
   6   7  -5    3.30    0.40
  -6  -7   5    3.60    0.57
   5   7  -5   19.57    1.73
   5   7  -5   21.44    1.72
   5   7  -5   19.11    1.53
   4   7  -5   14.68    1.12
   4   7  -5   14.28    1.27
   2   7  -5   40.06    3.29
   2   7  -5   37.83    2.92
   2   7  -5   39.70    3.25
  -2  -7   5   36.79    4.30
   1   7  -5    2.46    0.25
   1   7  -5    1.93    0.22
   1   7  -5    1.81    0.24
   0   7  -5   70.45    5.94
   0   7  -5   71.38    5.87
   0   7  -5   68.37    5.27
  -1   7  -5   11.32    0.87
  -1   7  -5   10.01    0.98
  -1   7  -5   11.48    0.94
  -2   7  -5    8.22    0.82
  -2   7  -5   10.97    0.88
  -2   7  -5   10.48    0.77
  -3   7  -5   32.30    2.11
   3  -7   5   23.77    2.33
  -4   7  -5   15.71    1.22
  -5   7  -5   15.78    1.22
  -5   7  -5   16.82    1.38
   5  -7   5   15.95    1.34
   5  -7   5   14.66    1.81
  -6   7  -5    4.65    0.43
   6  -7   5    5.66    0.68
   6  -7   5    4.47    0.43
  -7   7  -5    2.40    0.27
  -7   7  -5    2.73    0.33
   7  -7   5    1.63    0.37
  -8   7  -5   26.33    1.95
  -8   7  -5   26.86    2.20
   8  -7   5   23.23    2.90
  -9   7  -5    0.16    0.15
   9  -7   5    0.22    0.32
  10  -7   5    1.84    0.47
  11  -7   5    0.32    0.38
  12  -7   5    0.39    0.40
  13  -7   5    0.88    0.48
  14  -7   5    0.77    0.50
  15  -7   5   -0.38    0.55
  16  -7   5   -0.54    0.59
  15   6  -5   -0.69    0.63
  14   6  -5   -0.25    0.59
  14   6  -5   -0.07    0.25
  13   6  -5   -0.01    0.23
  13   6  -5   -0.29    0.54
  12   6  -5    1.65    0.30
  12   6  -5    0.82    0.54
  11   6  -5    0.18    0.21
  11   6  -5   -0.05    0.46
  10   6  -5    0.10    0.44
  10   6  -5    0.86    0.22
   9   6  -5    0.28    0.18
   9   6  -5    0.38    0.41
   7   6  -5    2.37    0.23
   7   6  -5    2.20    0.30
   7   6  -5    2.16    0.43
   7   6  -5    1.94    0.25
   6   6  -5   10.93    0.98
   6   6  -5   10.62    0.98
   6   6  -5   11.36    0.86
   5   6  -5    1.28    0.16
   5   6  -5    1.22    0.18
   5   6  -5    1.27    0.18
  -5  -6   5    0.96    0.27
   4   6  -5   16.77    1.28
   4   6  -5   17.10    1.45
  -4  -6   5   16.10    1.90
   3   6  -5   13.64    1.22
   3   6  -5   14.21    1.08
   2   6  -5    9.15    0.71
   2   6  -5    9.08    0.80
   2   6  -5    9.62    0.78
  -2  -6   5    7.49    1.08
   1   6  -5    2.47    0.31
   1   6  -5    2.64    0.27
   1   6  -5    2.33    0.25
   0   6  -5   69.73    5.96
   0   6  -5   75.53    5.89
   0   6  -5   71.93    5.29
   0  -6   5   64.14    7.78
  -1   6  -5    4.21    0.37
  -2   6  -5   53.34    5.39
  -2   6  -5   68.97    5.32
  -2   6  -5   68.49    4.79
  -3   6  -5   10.59    0.92
  -3   6  -5   10.44    0.81
   3  -6   5    9.69    1.18
  -5   6  -5   12.61    1.11
  -5   6  -5   12.29    0.97
  -6   6  -5    0.00    0.15
  -6   6  -5    0.27    0.11
   6  -6   5   -0.09    0.07
  -8   6  -5   10.07    0.79
  -8   6  -5   10.13    0.91
   8  -6   5    9.69    1.23
  10  -6   5    5.73    0.85
  11  -6   5    0.19    0.37
  12  -6   5    0.04    0.40
  13  -6   5    0.08    0.45
  14  -6   5    0.50    0.52
  15  -6   5   -0.78    0.56
  16  -6   5   -0.11    0.65
  15   5  -5   -0.67    0.60
  14   5  -5   -0.10    0.56
  14   5  -5    0.43    0.25
  13   5  -5    0.94    0.55
  13   5  -5    0.70    0.27
  12   5  -5    2.22    0.62
  12   5  -5    3.47    0.42
  11   5  -5   -0.04    0.19
  11   5  -5    0.23    0.45
  10   5  -5    0.40    0.45
  10   5  -5    1.16    0.24
   9   5  -5   -0.05    0.37
   9   5  -5    0.47    0.18
   8   5  -5    0.23    0.34
   8   5  -5    0.03    0.16
   7   5  -5    0.56    0.16
   7   5  -5    0.44    0.33
   7   5  -5    0.54    0.13
   6   5  -5    2.51    0.34
   6   5  -5    3.45    0.34
   6   5  -5    3.06    0.29
   6   5  -5    3.21    0.49
   5   5  -5   23.41    1.99
   5   5  -5   21.60    1.77
   5   5  -5   24.96    1.99
   4   5  -5   64.32    5.67
   4   5  -5   66.29    5.72
   4   5  -5   67.26    5.08
  -4  -5   5   72.31    7.48
   3   5  -5    4.07    0.44
   3   5  -5    3.70    0.40
  -3  -5   5    5.31    0.59
   2   5  -5   85.75    6.37
   2   5  -5   83.39    7.17
   2   5  -5   85.31    7.10
  -2  -5   5   84.85    9.38
   1   5  -5    1.88    0.19
   1   5  -5    1.65    0.21
   1   5  -5    1.55    0.19
  -1  -5   5    2.28    0.29
   0   5  -5    5.77    0.51
   0   5  -5    5.55    0.44
   0   5  -5    5.37    0.46
   0  -5   5    4.47    0.65
  -1   5  -5    1.66    0.20
  -1   5  -5    1.78    0.17
  -1   5  -5    1.86    0.19
  -2   5  -5    6.95    0.49
  -2   5  -5    5.54    0.57
   2  -5   5    5.54    0.72
  -3   5  -5    3.23    0.38
  -3   5  -5    3.32    0.32
   3  -5   5    3.89    0.49
  -4   5  -5    4.15    0.37
  -4   5  -5    4.29    0.44
  -5   5  -5   19.30    1.64
  -5   5  -5   18.71    1.45
  -6   5  -5    3.36    0.43
  -6   5  -5    4.90    0.37
  -7   5  -5    1.62    0.20
  -7   5  -5    1.66    0.23
   7  -5   5    2.27    0.35
   7  -5   5    1.78    0.20
  -8   5  -5    3.16    0.31
  -8   5  -5    3.23    0.38
   8  -5   5    3.34    0.58
  -9   5  -5    0.22    0.13
   9  -5   5    0.85    0.30
  10  -5   5   14.21    1.69
  11  -5   5   -0.19    0.36
  12  -5   5    0.92    0.44
  13  -5   5   -0.74    0.44
  14  -5   5    0.09    0.54
  15  -5   5   -0.73    0.57
  16  -5   5   -0.42    0.65
  17  -5   5   -1.12    0.69
  16   4  -5   -0.49    0.62
  15   4  -5   -0.70    0.55
  15   4  -5    0.08    0.25
  14   4  -5   -0.10    0.23
  14   4  -5   -0.42    0.52
  13   4  -5   -0.20    0.48
  13   4  -5   -0.38    0.22
  12   4  -5    3.28    0.42
  12   4  -5    2.59    0.60
  11   4  -5    0.05    0.20
  11   4  -5    0.28    0.42
  10   4  -5    7.68    1.05
  10   4  -5    8.10    0.76
   9   4  -5    2.08    0.48
   9   4  -5    2.46    0.32
   8   4  -5   17.20    1.96
   8   4  -5   16.46    1.47
   7   4  -5    5.13    0.47
   7   4  -5    3.48    0.68
   7   4  -5    4.61    0.44
   6   4  -5    6.45    0.71
   6   4  -5    6.98    0.70
   6   4  -5    8.84    0.62
   6   4  -5    9.23    0.99
   5   4  -5    3.57    0.47
   5   4  -5    2.57    0.34
   5   4  -5    3.04    0.34
   5   4  -5    2.97    0.29
   4   4  -5   33.38    2.47
   4   4  -5   32.58    2.78
   4   4  -5   29.32    2.75
  -4  -4   5   35.19    3.64
   3   4  -5    1.82    0.18
   3   4  -5    1.69    0.20
   3   4  -5    1.52    0.20
   2   4  -5   97.09    7.59
   2   4  -5   96.33    8.54
   2   4  -5   98.74    8.46
  -2  -4   5  112.15   11.16
   1   4  -5    3.16    0.28
   1   4  -5    2.85    0.31
   1   4  -5    2.80    0.27
   0   4  -5    8.70    0.65
   0   4  -5    8.58    0.74
   0   4  -5    8.26    0.71
   0  -4   5    7.72    0.95
  -1   4  -5   14.82    1.09
  -1   4  -5   13.64    1.23
  -2   4  -5    8.81    0.70
  -2   4  -5    8.23    0.79
   2  -4   5    9.59    1.02
  -3   4  -5    2.66    0.28
  -3   4  -5    2.97    0.32
   3  -4   5    3.30    0.43
  -4   4  -5    9.33    0.86
  -4   4  -5    8.84    0.76
   4  -4   5   10.81    1.13
  -5   4  -5    0.70    0.12
  -5   4  -5    1.22    0.15
   5  -4   5    0.92    0.23
  -6   4  -5   27.25    2.53
  -6   4  -5   31.64    2.24
   6  -4   5   29.79    2.48
  -8   4  -5   13.66    1.01
  -8   4  -5   13.00    1.14
   8  -4   5   13.73    1.12
   8  -4   5   11.16    1.55
   9  -4   5    0.50    0.13
   9  -4   5    0.40    0.29
  10  -4   5    1.83    0.44
  11  -4   5    3.09    0.58
  12  -4   5    1.40    0.49
  13  -4   5   -0.48    0.48
  14  -4   5    0.11    0.55
  15  -4   5   -0.83    0.59
  16  -4   5   -1.11    0.65
  16   3  -5   -0.10    0.61
  15   3  -5   -0.29    0.24
  15   3  -5   -0.68    0.55
  14   3  -5    0.16    0.25
  14   3  -5    0.25    0.52
  13   3  -5   -0.16    0.46
  13   3  -5    0.05    0.23
  12   3  -5    3.94    0.76
  12   3  -5    5.17    0.54
  11   3  -5    1.16    0.42
  11   3  -5    0.15    0.21
  10   3  -5    3.93    0.45
  10   3  -5    3.64    0.65
   9   3  -5    0.73    0.34
   9   3  -5    0.33    0.17
   8   3  -5    8.45    0.85
   8   3  -5   10.44    1.16
   7   3  -5    3.81    0.64
   7   3  -5    4.60    0.44
   6   3  -5   18.52    1.52
   6   3  -5   17.14    2.01
   6   3  -5   17.24    1.51
   5   3  -5    4.27    0.44
   5   3  -5    4.15    0.43
   5   3  -5    4.86    0.63
   5   3  -5    4.56    0.38
   4   3  -5    2.51    0.28
   4   3  -5    1.96    0.24
   3   3  -5    2.04    0.24
   3   3  -5    1.91    0.20
   2   3  -5   30.00    2.42
   2   3  -5   27.37    2.17
   2   3  -5   27.60    2.44
  -2  -3   5   29.69    3.19
   1   3  -5    4.18    0.36
   1   3  -5    3.96    0.38
   1   3  -5    3.73    0.34
   0   3  -5  177.00   15.06
   0   3  -5  179.91   13.38
  -2   3  -5    5.51    0.53
  -2   3  -5    5.91    0.47
   2  -3   5    6.10    0.69
  -3   3  -5   10.03    0.78
  -3   3  -5   10.01    0.88
  -4   3  -5    2.91    0.29
  -4   3  -5    1.97    0.25
   4  -3   5    3.70    0.42
  -5   3  -5    1.89    0.19
  -5   3  -5    1.42    0.17
   5  -3   5    1.55    0.16
   5  -3   5    1.30    0.25
  -6   3  -5    8.84    0.73
  -6   3  -5    8.74    0.83
   6  -3   5   10.60    1.13
  -7   3  -5    3.16    0.38
  -7   3  -5    4.02    0.32
   7  -3   5    2.94    0.33
   7  -3   5    3.69    0.51
  -8   3  -5   22.34    1.84
  -8   3  -5   21.37    1.62
   8  -3   5   19.62    2.44
   8  -3   5   21.65    1.81
   9  -3   5    0.06    0.10
   9  -3   5   -0.10    0.28
  10  -3   5    0.65    0.36
  11  -3   5    1.80    0.49
  12  -3   5   -0.16    0.44
  13  -3   5   -0.53    0.49
  14  -3   5   -0.53    0.57
  15  -3   5   -0.89    0.60
  16  -3   5   -0.51    0.68
  16   2  -5   -0.12    0.59
  15   2  -5   -0.06    0.54
  15   2  -5    0.05    0.26
  14   2  -5    0.69    0.54
  14   2  -5    1.35    0.31
  13   2  -5    0.17    0.25
  13   2  -5   -0.06    0.46
  12   2  -5    1.71    0.52
  12   2  -5    1.93    0.33
  11   2  -5    0.15    0.20
  11   2  -5    0.32    0.39
  10   2  -5    1.78    0.30
  10   2  -5    2.59    0.48
   9   2  -5    4.20    0.68
   9   2  -5    4.62    0.48
   8   2  -5    5.23    0.52
   7   2  -5    6.39    0.57
   7   2  -5    5.56    0.54
   7   2  -5    5.87    0.78
   6   2  -5   37.82    4.19
   6   2  -5   37.47    3.19
   5   2  -5    2.00    0.25
   5   2  -5    2.90    0.37
   5   2  -5    2.03    0.23
   4   2  -5   25.46    2.49
   4   2  -5   26.18    2.47
   4   2  -5   32.41    3.26
   4   2  -5   33.08    2.21
   3   2  -5    5.38    0.46
   3   2  -5    5.62    0.52
   3   2  -5    6.11    0.52
  -3  -2   5    5.99    0.69
   2   2  -5   39.50    3.10
   2   2  -5   43.50    3.46
  -2  -2   5   40.54    4.56
   1   2  -5   19.89    1.61
   1   2  -5   17.50    1.44
  -1  -2   5   19.65    2.12
   0   2  -5    5.30    0.46
   0   2  -5    4.73    0.43
   0  -2   5    5.98    0.62
   0  -2   5    5.26    0.49
  -1   2  -5   28.32    2.29
  -1   2  -5   29.81    2.54
   1  -2   5   31.76    3.36
   1  -2   5   31.54    2.58
  -2   2  -5    1.26    0.13
   2  -2   5    1.03    0.14
  -3   2  -5    0.02    0.06
   3  -2   5    0.20    0.13
   3  -2   5    0.08    0.06
  -4   2  -5    2.84    0.29
   4  -2   5    3.35    0.28
   4  -2   5    2.99    0.33
  -5   2  -5    1.21    0.16
   5  -2   5    1.72    0.22
   5  -2   5    1.69    0.29
  -6   2  -5    2.86    0.27
  -7   2  -5   10.19    0.80
   7  -2   5   10.04    1.23
   7  -2   5   10.24    0.88
  -8   2  -5   11.54    0.91
   8  -2   5   12.23    1.01
   8  -2   5   10.93    1.41
   9  -2   5    0.19    0.31
   9  -2   5    0.25    0.12
  10  -2   5   15.98    1.84
  10  -2   5   14.64    1.32
  11  -2   5   -0.43    0.40
  12  -2   5    0.47    0.49
  13  -2   5   -0.88    0.52
  14  -2   5   -0.81    0.57
  15  -2   5   -1.01    0.62
  16  -2   5   -1.11    0.66
  17   1  -5   -0.35    0.61
  16   1  -5   -0.10    0.57
  15   1  -5    0.08    0.27
  15   1  -5    0.52    0.54
  14   1  -5    1.32    0.32
  14   1  -5    1.28    0.52
  13   1  -5    0.30    0.44
  13   1  -5    0.03    0.23
  12   1  -5    1.87    0.33
  12   1  -5    2.33    0.52
  11   1  -5   -0.14    0.19
  11   1  -5    0.55    0.38
  10   1  -5   23.64    2.66
  10   1  -5   23.04    2.02
   9   1  -5    2.41    0.36
   9   1  -5    3.35    0.49
   8   1  -5    5.35    0.54
   7   1  -5   14.54    1.19
   7   1  -5   12.44    1.55
   6   1  -5    1.84    0.24
   5   1  -5    1.84    0.24
   5   1  -5    2.52    0.37
   5   1  -5    1.64    0.24
   5   1  -5    2.27    0.21
   4   1  -5    6.41    0.51
   3   1  -5   -0.04    0.06
  -3  -1   5    0.04    0.06
  -3  -1   5   -0.08    0.10
   2   1  -5    0.71    0.10
  -2  -1   5    0.95    0.11
   1   1  -5   28.68    2.33
  -1  -1   5   27.70    2.09
  -1  -1   5   26.70    2.35
   0   1  -5    1.27    0.14
  -1   1  -5    8.75    0.74
   1  -1   5    8.19    0.67
   1  -1   5    7.56    0.76
   1  -1   5   10.22    0.99
   2  -1   5   34.09    3.83
   2  -1   5   34.76    2.61
   2  -1   5   34.82    2.93
   3  -1   5    8.48    1.00
   3  -1   5    9.00    0.68
   3  -1   5    8.64    0.76
   4  -1   5   30.81    3.35
   4  -1   5   29.16    2.52
   4  -1   5   30.18    2.27
   4  -1   5   30.28    2.56
   5  -1   5    1.73    0.29
   5  -1   5    1.38    0.18
   5  -1   5    1.63    0.18
   5  -1   5    1.41    0.18
   6  -1   5   24.96    2.22
   6  -1   5   26.92    1.97
   7  -1   5    0.04    0.09
   7  -1   5   -0.11    0.10
   7  -1   5   -0.13    0.23
   8  -1   5    3.86    0.57
   8  -1   5    4.34    0.38
   8  -1   5    2.97    0.39
   9  -1   5   10.42    1.20
   9  -1   5    8.50    0.82
  10  -1   5    7.11    0.66
  10  -1   5    6.72    1.05
  11  -1   5    0.32    0.44
[truncated: 517,896 more chars]
